# Supplementary material for: Targeting A-kinase anchoring protein 12 phosphorylation in hepatic stellate cells regulates liver injury and fibrosis in mouse models
Source: eLife. 2022 Oct 4;11:e78430. doi: 10.7554/eLife.78430 (PMC9531947; doi:10.7554/eLife.78430)
Supplement: Figure 1—source data 4. [file elife-78430-fig1-data4.xlsx]

## Sheet: fig 1A 
Figure 1A
	AKAP12	AKAP12	AKAP12	Alpha-SMA	Alpha-SMA	Alpha-SMA
OIL	1.11557	1.1423	1.12902	0.137848	0.157681	0.139864
CCl4	1.00714	1.00533	0.955938	0.911539	0.934957	0.944489
	Protein	treatment pair	Tukey HSD	Tukey HSD	Tukey HSD
			Q statistic	p-value	inferfence
	AKAP12	CCl4 vs. oil	16.8924	0.0010064	** p<0.01
	α-SMA	CCl4 vs. oil	150.807	0.0010053	** p<0.01
Figure 1A	Akap12	Akap12	Akap12	Akap12	Acta2	Acta2	Acta2	Acta2
OIL	1.7606	0.85623	0.483327	1	0.95402	0.750355	1.16011	1
CCl4	0.905948	0.987943	0.984525	0.854114	1.52626	1.48968	1.42899	1.50525
	RNA	treatment pair	Tukey HSD	Tukey HSD	Tukey HSD
		pair	Q statistic	p-value	inferfence
	Akap12	CCl4 vs. oil	11.9934	0.0010053	** p<0.01
	Acta2	CCl4 vs. oil	0.6802	0.899995	insignificant

## Sheet: Fig 1B
Figure 1B	DESMIN	DESMIN	DESMIN	DESMIN	P-AKAP12	P-AKAP12	P-AKAP12	P-AKAP12
OIL	356	621	520	673	380	191	331	717
CCl4	724	1681	1001	928	1486	3180	2811	1147
	PLA staining	treatment pair	Tukey HSD	Tukey HSD	Tukey HSD
			Q statistic	p-value	inferfence
	Desmin	CCl4 vs. oil	4.9399	0.0200423	* p<0.05
	P-AKAP12	CCl4 vs. oil	6.898	0.0018618	** p<0.01
Figure 1B	AKAP12	AKAP12	AKAP12	AKAP12
OIL	10.092	14.667	12.363	13.44
CCl4	7.382	11.56	9.951	9.191
	IHC staining	treatment pair	Tukey HSD	Tukey HSD	Tukey HSD
			Q statistic	p-value	inferfence
	AKAP12	CCl4 vs. oil	4.7916	0.0240802	* p<0.05

## Sheet: fig1C
Figure 1C	IP:AKAP12 WB:HSP47	IP:AKAP12 WB:HSP47	IP:AKAP12 WB:HSP47	WB: HSP47	WB: HSP47	WB: HSP47
OIL	3.72292	2.42429	2.29767	0.130509	0.169502	0.411115
CCl4	1.52871	1.46554	0.89973	0.711842	0.584956	1.50918
	Sample	treatment pair	Tukey HSD	Tukey HSD	Tukey HSD
			Q statistic	p-value	inferfence
	IP:AKAP12 WB:HSP47		6.8194	0.0032677	** p<0.01
	WB: HSP47		5.1655	0.019494	* p<0.05

## Sheet: Figure 1D
Figure 1D	AKAP12-HSP47	AKAP12-HSP47	AKAP12-HSP47	AKAP12-HSP47	AKAP12-HSP47	AKAP12-HSP47	AKAP12-HSP47	AKAP12-HSP47	AKAP12-HSP47	AKAP12-HSP47	AKAP12-HSP47	AKAP12-HSP47	AKAP12-HSP47	AKAP12-HSP47	AKAP12-HSP47	AKAP12-HSP47	AKAP12	AKAP12	AKAP12	AKAP12	AKAP12	AKAP12	AKAP12	AKAP12	AKAP12	AKAP12	AKAP12	AKAP12	AKAP12	AKAP12	AKAP12	AKAP12	HSP47	HSP47	HSP47	HSP47	HSP47	HSP47	HSP47	HSP47	HSP47	HSP47	HSP47	HSP47	HSP47	HSP47	HSP47	HSP47
NORMAL	4366	2417	3886	3138	3061	4577	3109	3590	5220	5353	3695						3277	5954	2394	3304	5981	2421	3297	5974	2414	6001	2441						2309	797	1026	1319	2317	805	1034	1327	2325	813	1042
LIVER FIBROSIS	1245	690	901	1945	1584	1036	2653	2775	1885	1336	710	544	836	226	889	619	1532	2983	3666	1559	3010	3693	1548	2999	3682	1575	3026	3709	1554	3005	3688	1581	4318	4886	8357	3511	4337	4905	8376	3530	4322	4890	8361	3515	4341	4909	8380	3534
	Sample	treatment pair	Tukey HSD	Tukey HSD	Tukey HSD
			Q statistic	p-value	inferfence
	AKAP12-HSP47		12.7156	0.0010053	** p<0.01
	AKAP12		4.0383	0.0362433	* p<0.05
	HSP47		10.2475	0.0010053	** p<0.01
