# Supplementary material for: Targeting A-kinase anchoring protein 12 phosphorylation in hepatic stellate cells regulates liver injury and fibrosis in mouse models
Source: eLife. 2022 Oct 4;11:e78430. doi: 10.7554/eLife.78430 (PMC9531947; doi:10.7554/eLife.78430)
Supplement: Figure 2—source data 4. [file elife-78430-fig2-data4.xlsx]

## Sheet: fig 2A
Figure 2A	IP:AKAP12 WB:HSP47	IP:AKAP12 WB:HSP47	IP:AKAP12 WB:HSP47	alpha-SMA	alpha-SMA	alpha-SMA
Day 0	0.420433	0.230551	0.278429	0.052915	0.044959	0.14844
Day 3	0.172445	0.096619	0.110275	0.52687	0.231109	0.449133
Day 6	0.024395	0.053307	0.053741	0.729209	0.274213	0.434224
	Sample	treatment pair	Tukey HSD	Tukey HSD	Tukey HSD
			Q statistic	p-value	inferfence
	IP:AKAP12 WB:HSP47	Day3 vs. Day 0	6.6553	0.0038779	** p<0.01
		Day 6 vs. Day 0	10.2838	0.0010053	** p<0.01
	α-SMA	Day3 vs. Day 0	7.5734	0.0015257	** p<0.01
		Day 6 vs. Day 0	6.4653	0.0047309	** p<0.01

## Sheet: fig 2C
Figure 2C	WT	WT	WT	HDR	HDR	HDR
IP:AKAP12 WB:HSP47	1.35385	1.49252	1.52413	3.43219	4.30892	3.24196
HSP47	1.25863	1.07971	1.10274	0.707021	0.895378	0.93303
AKAP12	2.32262	1.58335	1.88683	1.3158	1.90255	1.59343
alpha-SMA	0.736289	0.828916	0.745375	0.486614	0.462333	0.429655
		Sample	treatment pair	Tukey HSD	Tukey HSD	Tukey HSD
				Q statistic	p-value	inferfence
		IP:AKAP12 WB:HSP47	HDR vs. WT	15.5371	0.0010053	** p<0.01
		HSP47	HDR vs. WT	7.8929	0.0010053	** p<0.01
		AKAP12	HDR vs. WT	2.8051	0.251377	insignificant
		α-SMA	HDR vs. WT	21.5659	0.0010053	** p<0.01

## Sheet: Fig 2E
Figure 2C	WT	WT	WT	WT	HDR	HDR	HDR	HDR
Calreticulin (ER marker)	327	348	226	230	156	214	315	246
AKAP12-HSP47	383	364	363	223	837	988	1532	566
	WT	WT	WT	WT	HDR	HDR	HDR	HDR
Calreticulin (ER marker)	688	1034	352	1059	586	270	230	1487
Collagen-HSP47	2871	1086	1274	2656	584	447	350	1339
			treatment pair	Tukey HSD	Tukey HSD	Tukey HSD
				Q statistic	p-value	inferfence
		Calreticulin (ER marker)	HDR vs. WT	2.2623	0.413418	insignificant
		AKAP12-HSP47	HDR vs. WT	6.2628	0.0039538	** p<0.01
			treatment pair	Tukey HSD	Tukey HSD	Tukey HSD
				Q statistic	p-value	inferfence
		Calreticulin (ER marker)	HDR vs. WT	0.8659	0.899995	insignificant
		Collagen-HSP47	HDR vs. WT	5.2443	0.0122924	* p<0.05
