# Supplementary material for: Targeting A-kinase anchoring protein 12 phosphorylation in hepatic stellate cells regulates liver injury and fibrosis in mouse models
Source: eLife. 2022 Oct 4;11:e78430. doi: 10.7554/eLife.78430 (PMC9531947; doi:10.7554/eLife.78430)
Supplement: Figure 3—source data 4. [file elife-78430-fig3-data4.xlsx]

## Sheet: Figure 3 source data 4
Figure 3C	PKC-alpha	PKC-alpha	PKC-alpha	PKC-alpha	PKC-alpha	IP: AKAP12 WB:HSP47	IP: AKAP12 WB:HSP47	IP: AKAP12 WB:HSP47	IP: AKAP12 WB:HSP47	IP: AKAP12 WB:HSP47	HSP47	HSP47	HSP47	HSP47	HSP47
NEG	0.927496	1.51214	0.743915	2.83274	2.53797	0.082744	0.280175	0.827858	0.226831	0.144395	1.72568	1.54412	2.28573	1.838	2.04869
siA	0.359866	0.369517	0.762767	0.321422	0.42079	1.37576	1.18286	0.957255	0.279131	0.867422	2.35314	2.05129	1.31586	1.28126	1.79197
siB	0.286852	0.404016	0.305875	0.075508	0.094365	2.51117	2.34391	2.67209	2.4416	3.12712	1.82122	1.49443	2.55839	1.49653	1.88524
			Sample	treatment pair	Tukey HSD	Tukey HSD	Tukey HSD
					Q statistic	p-value	inferfence
			PKC-α	siA vs. Neg	5.8966	0.0036307	** p<0.01
			PKC-α	siB vs. Neg	6.8169	0.0010053	** p<0.01
			PKC-α	siB vs. siA	4.1558	0.0430876	* p<0.05
			IP:AKAP12 WB:HSP47	siA vs. Neg	4.645	0.0218134	* p<0.05
			IP:AKAP12 WB:HSP47	siB vs. Neg	17.2797	0.0010053	** p<0.01
			IP:AKAP12 WB:HSP47	siB vs. siA	14.5798	0.0010053	** p<0.01
			HSP47	siA vs. Neg	0.8309	0.899995	insignificant
			HSP47	siB vs. Neg	0.2387	0.899995	insignificant
			HSP47	siB vs. siA	0.6499	0.899995	insignificant
