# Supplementary material for: Targeting A-kinase anchoring protein 12 phosphorylation in hepatic stellate cells regulates liver injury and fibrosis in mouse models
Source: eLife. 2022 Oct 4;11:e78430. doi: 10.7554/eLife.78430 (PMC9531947; doi:10.7554/eLife.78430)
Supplement: Figure 4—source data 3. [file elife-78430-fig4-data3.xlsx]

## Sheet: fig 4D
Figure 4D		OIL	OIL	OIL	OIL	OIL	OIL	CCl4	CCl4	CCl4	CCl4	CCl4	CCl4
SaCas9 count per Desmin area	PDEL	64.6927	99.0854	59.2446	59.3333	90.4667	54.6772	100.554	161.495	223.545	121.182	161.549	337.621
	PMUT	68.4138	96.9906	82.9141	84.4339	116.535	78.4106	117.707	180.348	240.55	139.265	180.446	353.904
			Sample	treatment pair	Tukey HSD	Tukey HSD	Tukey HSD
					Q statistic	p-value	inferfence
			SaCas9 count per desmin area	PDEL Oil vs. PDEL CCl4	5.9634	0.0026641	** p<0.01
			SaCas9 count per desmin area	PMUT Oil vs. PMUT CCl4	5.6088	0.0045788	** p<0.01
			SaCas9 count per desmin area	PDEL Oil vs. PMUT Oil	3.0887	0.165595	insignificant
			SaCas9 count per desmin area	PDEL CCl4 vs. PMUT CCl4	0.6784	0.899995	insignificant

## Sheet: fig 4F
Figure 4F		OIL	OIL	OIL	OIL	OIL	OIL	CCl4	CCl4	CCl4	CCl4	CCl4	CCl4
SaCas9 count per albumin area	PDEL	1.22599	1.03333	0.50159	0.613101	0.517464	1.00259	0.864865	2.30885	0.702612	0.694995	1.51461	0.410944
	PMUT	3.06968	0.775	3.51669	2.45399	0.776197	2.50432	2.33918	2.31388	1.40741	1.45263	3.53409	1.84615
			Sample	treatment pair	Tukey HSD	Tukey HSD	Tukey HSD
					Q statistic	p-value	inferfence
			SaCas9 count per albumin area	PDEL Oil vs. PDEL CCl4	0.8187	0.899995	insignificant
			SaCas9 count per albumin area	PMUT Oil vs. PMUT CCl4	0.1035	0.899995	insignificant
			SaCas9 count per albumin area	PDEL Oil vs. PMUT Oil	3.3709	0.112901	insignificant
			SaCas9 count per albumin area	PDEL CCl4 vs. PMUT CCl4	3.2675	0.128991	insignificant
