# Supplementary material for: Targeting A-kinase anchoring protein 12 phosphorylation in hepatic stellate cells regulates liver injury and fibrosis in mouse models
Source: eLife. 2022 Oct 4;11:e78430. doi: 10.7554/eLife.78430 (PMC9531947; doi:10.7554/eLife.78430)
Supplement: Figure 5—source data 3. [file elife-78430-fig5-data3.xlsx]

## Sheet: fig 5A
Figure 5A	OIL+EV	OIL+EV	OIL+EV	OIL+EV	OIL+EV	OIL+EV	OIL+CR-PDEL	OIL+CR-PDEL	OIL+CR-PDEL	OIL+CR-PDEL	OIL+CR-PDEL	OIL+CR-PDEL	CCL4+EV	CCL4+EV	CCL4+EV	CCL4+EV	CCL4+EV	CCL4+EV	CCL4+CR-PDEL	CCL4+CR-PDEL	CCL4+CR-PDEL	CCL4+CR-PDEL	CCL4+CR-PDEL	CCL4+CR-PDEL
PDEL	32	33	32	25	26	29.6	33	29	33	25	26	29	27	24	25	22	21	24	29	31	30	24	28.5	29
Figure 5A	OIL+EV	OIL+EV	OIL+EV	OIL+EV	OIL+EV	OIL+EV	OIL+CR-PMUT	OIL+CR-PMUT	OIL+CR-PMUT	OIL+CR-PMUT	OIL+CR-PMUT	OIL+CR-PMUT	CCL4+EV	CCL4+EV	CCL4+EV	CCL4+EV	CCL4+EV	CCL4+EV	CCL4+CR-PMUT	CCL4+CR-PMUT	CCL4+CR-PMUT	CCL4+CR-PMUT	CCL4+CR-PMUT	CCL4+CR-PMUT
PMUT	32	28	28	27	32	27	32	32	30	31	29	33	25	23	22	26	25	25	30	29	30	26	27	26
						Tukey HSD	Tukey HSD	Tukey HSD				Tukey HSD	Tukey HSD	Tukey HSD
				Body weight	Treatment pair	Q statistic	p-value	inferfence		Body weight	Treatment pair	Q statistic	p-value	inferfence
				PDEL	Oil+CR vs. Oil+EV	0.3683	0.899995	insignificant		PMUT	Oil+CR vs. Oil+EV	2.8747	0.209634	insignificant
				PDEL	CCl4+EV vs. Oil+EV	4.9019	0.0120022	* p<0.05		PMUT	CCl4+EV vs. Oil+EV	6.1917	0.0015278	** p<0.01
				PDEL	CCl4+CR vs. Oil+EV	0.8642	0.899995	insignificant		PMUT	CCl4+CR vs. Oil+EV	1.3268	0.76475	insignificant
				PDEL	CCl4+CR vs. CCl4+EV	4.0377	0.0445749	* p<0.05		PMUT	CCl4+CR vs. CCl4+EV	4.8649	0.0127171	* p<0.05
				PDEL	CCL4+CR vs. OIL+CR	0.4959	0.899995	insignificant		PMUT	CCL4+CR vs. OIL+CR	4.8649	0.0127171	* p<0.05

## Sheet: fig 5B
Figure 5B	OIL+EV	OIL+EV	OIL+EV	OIL+EV	OIL+EV	OIL+EV	OIL+CR-PDEL	OIL+CR-PDEL	OIL+CR-PDEL	OIL+CR-PDEL	OIL+CR-PDEL	OIL+CR-PDEL	CCL4+EV	CCL4+EV	CCL4+EV	CCL4+EV	CCL4+EV	CCL4+EV	CCl4+CR-PDEL	CCl4+CR-PDEL	CCl4+CR-PDEL	CCl4+CR-PDEL	CCl4+CR-PDEL	CCl4+CR-PDEL
PDEL	4.375	4.54545	4.375	4.4	4.61538	4.46023	4.54545	6.37931	4.51515	4.04	3.96154	5.46238	5.18518	5.41667	5.2	5.90909	5.71429	5.30093	4.48276	4.83871	4.16667	4.58333	4.91228	4.66073
Figure 5B	OIL+EV	OIL+EV	OIL+EV	OIL+EV	OIL+EV	OIL+EV	OIL+CR-PMUT	OIL+CR-PMUT	OIL+CR-PMUT	OIL+CR-PMUT	OIL+CR-PMUT	OIL+CR-PMUT	CCL4+EV	CCL4+EV	CCL4+EV	CCL4+EV	CCL4+EV	CCL4+EV	CCL4+CR-PMUT	CCL4+CR-PMUT	CCL4+CR-PMUT	CCL4+CR-PMUT	CCL4+CR-PMUT	CCL4+CR-PMUT
PMUT	4.375	4.54545	4.375	4.46023	4.3875	4.53781	4.0625	4.0625	4	4.34	4.7	4.5	5.90909	5.41667	5.2	5.30093	5.1	5.1	5	4.82759	4.33333	5.1	5.1	5.2
						Tukey HSD	Tukey HSD	Tukey HSD				Tukey HSD	Tukey HSD	Tukey HSD
				Liver/body weight ratio	Treatment pair	Q statistic	p-value	inferfence		Liver/body weight ratio	Treatment pair	Q statistic	p-value	inferfence
				PDEL	Oil+CR vs. Oil+EV	1.707	0.618052	insignificant		PMUT	Oil+CR vs. Oil+EV	1.5649	0.672878	insignificant
				PDEL	CCl4+EV vs. Oil+EV	4.7664	0.0148269	* p<0.05		PMUT	CCl4+EV vs. Oil+EV	8.234	0.0010053	** p<0.01
				PDEL	CCl4+CR vs. Oil+EV	0.6991	0.899995	insignificant		PMUT	CCl4+CR vs. Oil+EV	4.4345	0.0246787	* p<0.05
				PDEL	CCl4+CR vs. CCl4+EV	4.0673	0.042687	* p<0.05		PMUT	CCl4+CR vs. CCl4+EV	3.7994	0.0451875	* p<0.05
				PDEL	CCL4+CR vs. OIL+CR	1.008	0.887755	insignificant		PMUT	CCL4+CR vs. OIL+CR	5.9995	0.0020858	** p<0.01

## Sheet: fig 5E
Figure 5E	OIL+EV	OIL+EV	OIL+EV	OIL+EV	OIL+EV	OIL+EV	OIL+CR-PDEL	OIL+CR-PDEL	OIL+CR-PDEL	OIL+CR-PDEL	OIL+CR-PDEL	OIL+CR-PDEL	CCL4+EV	CCL4+EV	CCL4+EV	CCL4+EV	CCL4+EV	CCL4+EV	CCL4+CR-PDEL	CCL4+CR-PDEL	CCL4+CR-PDEL	CCL4+CR-PDEL	CCL4+CR-PDEL	CCL4+CR-PDEL
PDEL	85.33	66.4947	65.9106	86.37	74.9839	65.6838	67.5949	98.3607	96.0883	142.302	67.7005	67.7	184.891	162.791	222.81	159.097	128.649	196.721	102.502	108.501	103.871	60.3758	118.146	65.7482
Figure 5E	OIL+EV	OIL+EV	OIL+EV	OIL+EV	OIL+EV	OIL+EV	OIL+CR-PMUT	OIL+CR-PMUT	OIL+CR-PMUT	OIL+CR-PMUT	OIL+CR-PMUT	OIL+CR-PMUT	CCL4+EV	CCL4+EV	CCL4+EV	CCL4+EV	CCL4+EV	CCL4+EV	CCL4+CR-PMUT	CCL4+CR-PMUT	CCL4+CR-PMUT	CCL4+CR-PMUT	CCL4+CR-PMUT	CCL4+CR-PMUT
PMUT	73.7215	60.3279	58.9094	75.4852	66.3981	58.8462	68.1251	95.8747	73.31	68.1251	125.935	75.6309	141.532	162.04	143.395	122.993	159.083	168.482	124.876	115.401	118.25	101.681	118.173	130.496
					Tukey HSD	Tukey HSD	Tukey HSD				Tukey HSD	Tukey HSD	Tukey HSD
			Hydroxyproline content	Treatment pair	Q statistic	p-value	inferfence		Hydroxyproline content	Treatment pair	Q statistic	p-value	inferfence
			PDEL	Oil+CR vs. Oil+EV	1.5149	0.692186	insignificant		PMUT	Oil+CR vs. Oil+EV	2.9992	0.180634	insignificant
			PDEL	CCl4+EV vs. Oil+EV	9.7328	0.0010053	** p<0.01		PMUT	CCl4+EV vs. Oil+EV	13.3357	0.0010053	** p<0.01
			PDEL	CCl4+CR vs. Oil+EV	1.8243	0.572818	insignificant		PMUT	CCl4+CR vs. Oil+EV	8.3425	0.0010053	** p<0.01
			PDEL	CCl4+CR vs. CCl4+EV	7.9085	0.0010053	** p<0.01		PMUT	CCl4+CR vs. CCl4+EV	4.9932	0.0104013	* p<0.05
			PDEL	CCL4+CR vs. OIL+CR	0.3094	0.899995	insignificant		PMUT	CCL4+CR vs. OIL+CR	5.3433	0.0059754	** p<0.01

## Sheet: fig 5F
Figure 5F
PDEL	OIL+EV	OIL+EV	OIL+EV	OIL+EV	OIL+EV	OIL+EV	OIL+CR-PDEL	OIL+CR-PDEL	OIL+CR-PDEL	OIL+CR-PDEL	OIL+CR-PDEL	OIL+CR-PDEL	CCL4+EV	CCL4+EV	CCL4+EV	CCL4+EV	CCL4+EV	CCL4+EV	CCL4+CR-PDEL	CCL4+CR-PDEL	CCL4+CR-PDEL	CCL4+CR-PDEL	CCL4+CR-PDEL	CCL4+CR-PDEL
ALT	1.53285	0.510949	92.2263	1.53285	5.36496	20.2336	2.0438	154.307	15.3285	4.85402	9.19708	37.146	121.606	143.066	298.139	132.336	126.46	212.299	6.13139	7.66423	1.0219	80.4745	112.153	41.489
AST	11.0706	17.4574	30.2311	7.23844	15.7543	16.3504	17.8832	32.573	47.2628	16.1801	44.2822	30.2311	164.355	162.226	168.187	405.353	163.291	286.77	41.7275	66.4234	106.448	7.66423	81.7518	44.708
Figure 5F
PMUT	OIL+EV	OIL+EV	OIL+EV	OIL+EV	OIL+EV	OIL+EV	OIL+CR-PMUT	OIL+CR-PMUT	OIL+CR-PMUT	OIL+CR-PMUT	OIL+CR-PMUT	OIL+CR-PMUT	CCL4+EV	CCL4+EV	CCL4+EV	CCL4+EV	CCL4+EV	CCL4+EV	CCL4+CR-PMUT	CCL4+CR-PMUT	CCL4+CR-PMUT	CCL4+CR-PMUT	CCL4+CR-PMUT	CCL4+CR-PMUT
ALT	1.0219	46.8796	12.7993	19.4161	20.438	50.5839	15.3285	4.85402	9.19708	18.3942	16.0949	36.7883	132.336	215.237	169.38	142.555	247.555	319.088	58.7591	58.3333	76.6423	47.5183	41.3869	21.9708
AST	14.264	18.7348	16.0523	40.8759	63.4428	34.489	47.2628	16.1801	44.2822	136.679	105.596	133.698	163.291	286.77	225.03	253.771	251.642	172.445	42.4726	24.2701	54.6077	81.326	81.7518	80.0487
						Tukey HSD	Tukey HSD	Tukey HSD				Tukey HSD	Tukey HSD	Tukey HSD
				ALT/AST levels	Treatment pair	Q statistic	p-value	inferfence		ALT/AST levels	Treatment pair	Q statistic	p-value	inferfence
				PDEL-ALT	Oil+CR vs. Oil+EV	0.7637	0.899995	insignificant		PMUT-ALT	Oil+CR vs. Oil+EV	0.5356	0.899995	insignificant
				PDEL-ALT	CCl4+EV vs. Oil+EV	6.8673	0.0010053	** p<0.01		PMUT-ALT	CCl4+EV vs. Oil+EV	11.406	0.0010053	** p<0.01
				PDEL-ALT	CCl4+CR vs. Oil+EV	0.9598	0.899995	insignificant		PMUT-ALT	CCl4+CR vs. Oil+EV	1.6284	0.648408	insignificant
				PDEL-ALT	CCl4+CR vs. CCl4+EV	5.9075	0.0024186	** p<0.01		PMUT-ALT	CCl4+CR vs. CCl4+EV	9.7776	0.0010053	** p<0.01
				PDEL-ALT	CCL4+CR vs. OIL+CR	0.1961	0.899995	insignificant		PMUT-ALT	CCL4+CR vs. OIL+CR	7.164	0.00314803	*p<0.05
				PDEL-AST	Oil+CR vs. Oil+EV	0.6841	0.899995	insignificant		PMUT-AST	Oil+CR vs. Oil+EV	3.1264	0.154505	insignificant
				PDEL-AST	CCl4+EV vs. Oil+EV	9.4843	0.0010053	** p<0.01		PMUT-AST	CCl4+EV vs. Oil+EV	12.3128	0.0010053	** p<0.01
				PDEL-AST	CCl4+CR vs. Oil+EV	1.8984	0.544221	insignificant		PMUT-AST	CCl4+CR vs. Oil+EV	1.8665	0.556527	insignificant
				PDEL-AST	CCl4+CR vs. CCl4+EV	7.5859	0.0010053	** p<0.01		PMUT-AST	CCl4+CR vs. CCl4+EV	10.4462	0.0010053	** p<0.01
				PDEL-AST	CCL4+CR vs. OIL+CR	1.2143	0.808142	insignificant		PMUT-AST	CCL4+CR vs. OIL+CR	1.2599	0.790546	insignificant
