# Supplementary material for: Targeting A-kinase anchoring protein 12 phosphorylation in hepatic stellate cells regulates liver injury and fibrosis in mouse models
Source: eLife. 2022 Oct 4;11:e78430. doi: 10.7554/eLife.78430 (PMC9531947; doi:10.7554/eLife.78430)
Supplement: Figure 6—source data 4. [file elife-78430-fig6-data4.xlsx]

## Sheet: Figure 6A 
Figure 6A
PDEL	OIL+EV	OIL+EV	OIL+EV	OIL+EV	OIL+EV	OIL+EV	OIL+CR-PDEL	OIL+CR-PDEL	OIL+CR-PDEL	OIL+CR-PDEL	OIL+CR-PDEL	OIL+CR-PDEL	CCl4+EV	CCl4+EV	CCl4+EV	CCl4+EV	CCl4+EV	CCl4+EV	CCl4+CR-PDEL	CCl4+CR-PDEL	CCl4+CR-PDEL	CCl4+CR-PDEL	CCl4+CR-PDEL	CCl4+CR-PDEL
IP:AKAP12 WB:HSP47	0.345511	0.364221	0.49756	0.678956	0.610642	0.876797	0.325882	0.273066	0.326661	0.5616	0.633152	0.848661	0.1912	0.172651	0.289997	0.231576	0.289717	0.407666	0.577605	0.750558	0.547034	0.803564	0.751081	0.591028
AKAP12	0.79355	0.931366	0.849724	0.979861	0.893573	0.955864	0.945733	1.0083	1.04675	1.35777	1.37975	1.40975	0.63484	0.681093	0.695779	0.751889	0.698858	0.804692	0.935629	1.04011	0.646654	0.829416	0.896365	1.12857
HSP47	0.189062	0.154219	0.541397	0.282438	0.213322	0.66573	0.270155	0.061351	0.306974	0.387857	0.083952	0.413429	0.442963	0.378374	0.979916	0.671973	0.499351	0.800085	0.311616	0.259924	0.339908	0.346416	0.333385	0.427961
alpha-SMA	0.085922	0.131595	0.150379	0.297748	0.230383	0.168527	0.053885	0.100082	0.139042	0.211444	0.37041	0.298746	0.441683	0.584785	0.478229	0.659738	0.485967	0.614601	0.226599	0.112798	0.101377	0.535751	0.156704	0.054746
					Tukey HSD	Tukey HSD	Tukey HSD					Tukey HSD	Tukey HSD	Tukey HSD
			Co-immunoprecipitation	Treatment pair	Q statistic	p-value	inferfence			Protein	Treatment pair	Q statistic	p-value	inferfence
			IP:AKAP12 WB:HSP47	Oil+CR vs. Oil+EV	0.9895	0.894898	insignificant			AKAP12	Oil+CR vs. Oil+EV	4.9799	0.0106254	* p<0.05
			IP:AKAP12 WB:HSP47	CCl4+EV vs. Oil+EV	4.3789	0.0268466	* p<0.05			AKAP12	CCl4+EV vs. Oil+EV	8.2256	0.0010053	** p<0.01
			IP:AKAP12 WB:HSP47	CCl4+CR vs. Oil+EV	1.5824	0.66612	insignificant			AKAP12	CCl4+CR vs. Oil+EV	0.2079	0.899995	insignificant
			IP:AKAP12 WB:HSP47	CCl4+CR vs. CCl4+EV	5.9614	0.0022167	** p<0.01			AKAP12	CCl4+CR vs. CCl4+EV	4.339	0.019011	*p<0.05
			IP:AKAP12 WB:HSP47	CCL4+CR vs. OIL+CR	2.5719	0.294302	insignificant			AKAP12	CCL4+CR vs. OIL+CR	4.772	0.0146966	* p<0.05
					Tukey HSD	Tukey HSD	Tukey HSD					Tukey HSD	Tukey HSD	Tukey HSD
			Protein	Treatment pair	Q statistic	p-value	inferfence			Protein	Treatment pair	Q statistic	p-value	inferfence
			HSP47	Oil+CR vs. Oil+EV	1.2122	0.808971	insignificant			α-SMA	Oil+CR vs. Oil+EV	0.367	0.899995	insignificant
			HSP47	CCl4+EV vs. Oil+EV	4.0058	0.0466904	* p<0.05			α-SMA	CCl4+EV vs. Oil+EV	7.405	0.0010053	** p<0.01
			HSP47	CCl4+CR vs. Oil+EV	0.0625	0.899995	insignificant			α-SMA	CCl4+CR vs. Oil+EV	0.4153	0.899995	insignificant
			HSP47	CCl4+CR vs. CCl4+EV	4.0683	0.0426206	* p<0.05			α-SMA	CCl4+CR vs. CCl4+EV	6.9897	0.0010053	** p<0.01
			HSP47	CCL4+CR vs. OIL+CR	1.1496	0.8331	insignificant			α-SMA	CCL4+CR vs. OIL+CR	0.0483	0.899995	insignificant

## Sheet: Figure 6B
Figure 6B
PMUT	OIL+EV	OIL+EV	OIL+EV	OIL+EV	OIL+EV	OIL+EV	OIL+CR-PMUT	OIL+CR-PMUT	OIL+CR-PMUT	OIL+CR-PMUT	OIL+CR-PMUT	OIL+CR-PMUT	CCl4+EV	CCl4+EV	CCl4+EV	CCl4+EV	CCl4+EV	CCl4+EV	CCl4+CR-PMUT	CCl4+CR-PMUT	CCl4+CR-PMUT	CCl4+CR-PMUT	CCl4+CR-PMUT	CCl4+CR-PMUT
IP:AKAP12 WB:HSP47	1.05466	1.70289	1.10089	0.56104	0.774588	1.04772	1.17993	0.726231	0.645102	1.09955	1.0706	0.639316	0.293308	0.034945	0.297306	0.333725	0.398733	0.388481	0.521171	0.346818	0.81622	0.699188	0.479601	0.755678
AKAP12	1.268	1.18704	1.43318	1.18482	0.988805	0.99717	1.47136	1.6726	1.82457	1.19241	1.06193	1.13147	1.00397	0.889629	1.04654	0.907857	0.791044	0.797736	1.2963	1.3916	1.12624	0.838852	1.07325	1.37514
HSP47	0.05359	0.324518	0.697321	0.366897	0.579157	0.638666	0.018214	0.19511	0.138265	0.427106	0.499517	0.429084	0.62543	0.59573	0.561071	0.896742	1.01243	1.05758	0.077178	0.101003	0.244381	0.41056	0.445063	0.439917
alpha-SMA	0.293633	0.452683	0.616492	0.461267	0.500127	0.413553	0.60371	0.206671	0.229026	0.280829	0.272791	0.231641	1.0852	2.06049	2.17365	1.03412	1.12657	0.750524	0.83089	0.706635	0.712914	0.685683	0.612504	0.539415
				Tukey HSD	Tukey HSD	Tukey HSD					Tukey HSD	Tukey HSD	Tukey HSD
		Co-immunoprecipitation	Treatment pair	Q statistic	p-value	inferfence			Protein	Treatment pair	Q statistic	p-value	inferfence
		IP:AKAP12 WB:HSP47	Oil+CR vs. Oil+EV	1.4068	0.733897	insignificant			AKAP12	Oil+CR vs. Oil+EV	2.4762	0.325134	insignificant
		IP:AKAP12 WB:HSP47	CCl4+EV vs. Oil+EV	7.1775	0.0010053	** p<0.01			AKAP12	CCl4+EV vs. Oil+EV	10.128	0.00746873	**p<0.01
		IP:AKAP12 WB:HSP47	CCl4+CR vs. Oil+EV	4.1882	0.0357162	* p<0.05			AKAP12	CCl4+CR vs. Oil+EV	0.081	0.899995	insignificant
		IP:AKAP12 WB:HSP47	CCl4+CR vs. CCl4+EV	5.7707	0.003014	** p<0.01			AKAP12	CCl4+CR vs. CCl4+EV	5.5773	0.01681	*p<0.05
		IP:AKAP12 WB:HSP47	CCL4+CR vs. OIL+CR	2.7815	0.233531	insignificant			AKAP12	CCL4+CR vs. OIL+CR	3.1821	0.143978	insignifican
				Tukey HSD	Tukey HSD	Tukey HSD					Tukey HSD	Tukey HSD	Tukey HSD
		Protein	Treatment pair	Q statistic	p-value	inferfence			Protein	Treatment pair	Q statistic	p-value	inferfence
		HSP47	Oil+CR vs. Oil+EV	1.8603	0.558911	insignificant			α-SMA	Oil+CR vs. Oil+EV	1.1859	0.819103	insignificant
		HSP47	CCl4+EV vs. Oil+EV	4.0782	0.0420122	* p<0.05			α-SMA	CCl4+EV vs. Oil+EV	7.134	0.0010053	** p<0.01
		HSP47	CCl4+CR vs. Oil+EV	1.8392	0.567054	insignificant			α-SMA	CCl4+CR vs. Oil+EV	8.32	0.0010053	** p<0.01
		HSP47	CCl4+CR vs. CCl4+EV	5.9174	0.0023811	** p<0.01			α-SMA	CCl4+CR vs. CCl4+EV	5.3803	0.0056332	** p<0.01
		HSP47	CCL4+CR vs. OIL+CR	0.0211	0.899995	insignificant			α-SMA	CCL4+CR vs. OIL+CR	7.77	0.00151203	** p<0.01

## Sheet: fig6C 
Figure 6C	IP: HSP47 WB: Type 1 collagen	IP: HSP47 WB: Type 1 collagen	IP: HSP47 WB: Type 1 collagen	IP: HSP47 WB: Type 1 collagen	IP: HSP47 WB: Type 1 collagen
OIL+EV	0.567606	0.481883	0.15	0.21	0.2
OIL+CR-PDEL	0.024989	0.133055	0.45	0.67	0.55
OIL+CR-PMUT	0.261112	0.691754	0.43
CCl4+EV	3.08754	1.50177	0.899553	1.08988	1.03532
CCl4+CR-PDEL	0.296437	0.084355	0.479974	0.698765	0.30696
CCl4+CR-PMUT	0.235077	0.178284	0.050333
			Tukey HSD	Tukey HSD	Tukey HSD
	Co-immunoprecipitation	Treatment pair	Q statistic	p-value	inferfence
	IP:AKAP12 WB:HSP47	Oil+CR-PDEL vs. Oil+EV	0.1975	0.899995	insignificant
	IP:AKAP12 WB:HSP47	CCl4+EV vs. Oil+EV	4.96	0.0195492	* p<0.05
	IP:AKAP12 WB:HSP47	CCl4+CR-PDEL vs. Oil+EV	0.2322	0.899995	insignificant
	IP:AKAP12 WB:HSP47	CCl4+CR-PDEL vs. CCl4+EV	5.1928	0.0099928	** p<0.01
	IP:AKAP12 WB:HSP47	CCL4+CR-PDEL vs. OIL+CR-PDEL	0.0347	0.899995	insignificant
			Tukey HSD	Tukey HSD	Tukey HSD
	Co-immunoprecipitation	Treatment pair	Q statistic	p-value	inferfence
	IP:AKAP12 WB:HSP47	Oil+CR-PMUT vs. Oil+EV	0.4974	0.899995	insignificant
	IP:AKAP12 WB:HSP47	CCl4+EV vs. Oil+EV	4.96	0.0195492	* p<0.05
	IP:AKAP12 WB:HSP47	CCl4+CR-PMUT vs. Oil+EV	0.5985	0.899995	insignificant
	IP:AKAP12 WB:HSP47	CCl4+CR-PMUT vs. CCl4+EV	4.894	0.0212124	* p<0.05
	IP:AKAP12 WB:HSP47	CCL4+CR-PMUT vs. OIL+CR-PMUT	0.9802	0.898271	insignificant

## Sheet: fig 6D
Figure 6D
PDEL	Col1A1	Col1A1	Col1A1	Col1A1	Col1A1	Col1A1	Acta2	Acta2	Acta2	Acta2	Acta2	Acta2
OIL+EV	1	1.12	0.9	1.15	0.98	1.03	1	0.99	0.95	1.07	1.02	1.13
OIL+CR-PDEL	0.36	0.52	1.5	1.03	0.98	0.79	0.96	0.94	0.75	1.6	0.79	1.57
CCL4+EV	2.76	4.88	3.6	3.73	4.12	3.98	1.79	1.68	1.64	1.71	1.72	1.95
CCL4+CR-PDEL	1.13	1.26	1.15	1.12	1.03	1.09	0.93	0.98	1.23	1.08	0.86	0.82
Figure 6D
PMUT	Col1A1	Col1A1	Col1A1	Col1A1	Col1A1	Col1A1	Acta2	Acta2	Acta2	Acta2	Acta2	Acta2
OIL+EV	1	0.96	0.99	1.02	1.01	1.27	1	1.22	1.16	0.97	1.02	1.05
OIL+CR-PMUT	0.93	1.01	1.03	0.92	9.97	0.88	0.71	0.86	0.98	1.05	1.14	0.69
CCL4+EV	3.12	3.15	4.22	3.56	3.67	4.01	2.11	2.19	1.99	1.97	1.89	2.01
CCL4+CR-PMUT	1.22	0.8	1.35	1.25	0.91	0.99	1.45	1.39	1.65	1.34	1.37	1.33
			Tukey HSD	Tukey HSD	Tukey HSD				Tukey HSD	Tukey HSD	Tukey HSD
	RNA	Treatment pair	Q statistic	p-value	inferfence		RNA	Treatment pair	Q statistic	p-value	inferfence
	Col1A1	Oil+CR-PDEL vs. Oil+EV	1.0034	0.889512	insignificant		Col1A1	Oil+CR-PMUT vs. Oil+EV	9.93221	0.971432	insignificant
	Col1A1	CCl4+EV vs. Oil+EV	16.9477	0.0010053	** p<0.01		Col1A1	CCl4+EV vs. Oil+EV	0.12	1.3e-05	** p<0.01
	Col1A1	CCl4+CR-PDEL vs. Oil+EV	0.602	0.899995	insignificant		Col1A1	CCl4+CR-PMUT vs. Oil+EV	0.12	0.961223	insignificant
	Col1A1	CCl4+CR-PDEL vs. CCl4+EV	16.3456	0.0010053	** p<0.01		Col1A1	CCl4+CR-PMUT vs. CCl4+EV	8.7841	0.000822	** p<0.01
	Col1A1	CCL4+CR-PDEL vs. OIL+CR-PDEL	1.6055	0.657241	insignificant		Col1A1	CCL4+CR-PMUT vs. OIL+CR-PMUT	1.455	0.823156	insignificant
			Tukey HSD	Tukey HSD	Tukey HSD				Tukey HSD	Tukey HSD	Tukey HSD
	RNA	Treatment pair	Q statistic	p-value	inferfence		RNA	Treatment pair	Q statistic	p-value	inferfence
	Acta2	Oil+CR-PDEL vs. Oil+EV	0.8514	0.899995	insignificant		Acta2	Oil+CR-PMUT vs. Oil+EV	3.0756	0.164635	insignificant
	Acta2	CCl4+EV vs. Oil+EV	8.1922	0.0010053	** p<0.01		Acta2	CCl4+EV vs. Oil+EV	17.8325	0.00100536	** p<0.01
	Acta2	CCl4+CR-PDEL vs. Oil+EV	0.4919	0.899995	insignificant		Acta2	CCl4+CR-PMUT vs. Oil+EV	6.5551	0.00100531	** p<0.01
	Acta2	CCl4+CR-PDEL vs. CCl4+EV	8.6841	0.0010053	** p<0.01		Acta2	CCl4+CR-PMUT vs. CCl4+EV	11.2773	0.00100532	** p<0.01
	Acta2	CCL4+CR-PDEL vs. OIL+CR-PDEL	1.3433	0.758389	insignificant		Acta2	CCL4+CR-PMUT vs. OIL+CR-PMUT	9.6308	0.00100521	** p<0.01

## Sheet: figure 6E 
Figure 6E
AKAP12-HSP47 PLA (counts per desmin area)
OIL+EV	896.123	635.402	156.733	332.311
OIL+CR-PDEL	595.833	549.522	563.885	878.721
OIL+CR-PMUT	241.997	368.793	609.687	412.542
CCL4+EV	35.4582	43.4059	36.2722	38.7436
CCL4+CR-PDEL	561.453	359.106	295.389	312.024
CCL4+CR-PMUT	319.477	419.611	356.637	371.201
		Tukey HSD	Tukey HSD	Tukey HSD				Tukey HSD	Tukey HSD	Tukey HSD
PLA count	Treatment pair	Q statistic	p-value	inferfence		PLA count	Treatment pair	Q statistic	p-value	inferfence
AKAP12-HSP47 PLA	Oil+CR-PDEL vs. Oil+EV	1.4832	0.708666	insignificant		AKAP12-HSP47 PLA	Oil+CR-PMUT vs. Oil+EV	1.0666	0.865711	insignificant
AKAP12-HSP47 PLA	CCl4+EV vs. Oil+EV	4.8799	0.0215878	* p<0.05		AKAP12-HSP47 PLA	CCl4+EV vs. Oil+EV	5.1374	0.0156909	* p<0.05
AKAP12-HSP47 PLA	CCl4+CR-PDEL vs. Oil+EV	1.2878	0.782351	insignificant		AKAP12-HSP47 PLA	CCl4+CR-PMUT vs. Oil+EV	1.5237	0.693414	insignificant
AKAP12-HSP47 PLA	CCl4+CR-PDEL vs. CCl4+EV	2.50692	0.00138148	* p<0.05		AKAP12-HSP47 PLA	CCl4+CR-PMUT vs. CCl4+EV	1.0031	0.0001223	**p<0.01
AKAP12-HSP47 PLA	CCL4+CR-PDEL vs. OIL+CR-PDEL	2.771	0.255878	insignificant		AKAP12-HSP47 PLA	CCL4+CR-PMUT vs. OIL+CR-PMUT	0.4571	0.899995	insignificant
