# Supplementary material for: Targeting A-kinase anchoring protein 12 phosphorylation in hepatic stellate cells regulates liver injury and fibrosis in mouse models
Source: eLife. 2022 Oct 4;11:e78430. doi: 10.7554/eLife.78430 (PMC9531947; doi:10.7554/eLife.78430)
Supplement: Figure 7—source data 5. [file elife-78430-fig7-data5.xlsx]

## Sheet: fig 7B
Figure 7B	OIL+EV	OIL+EV	OIL+EV	OIL+CR	OIL+CR	OIL+CR	CCl4+EV	CCl4+EV	CCl4+EV	OIL+CR	OIL+CR	OIL+CR
IP:collagen WB:BIP	0.286378	0.400417	0.492365	0.224687	0.247641	0.551664	0.538705	0.739553	0.7607	0.099239	0.156654	0.30939
WB: BIP	0.971905	0.838615	1.08267	1.15632	0.930218	1.31414	1.67664	1.25262	1.42941	1.62	1.2	1.4
	OIL+EV	OIL+EV	OIL+EV	OIL+CR	OIL+CR	OIL+CR	CCl4+EV	CCl4+EV	CCl4+EV	CCL4+CR	CCL4+CR	CCL4+CR
IP:IRE1 WB:HSP47	0.454982	0.08267	0.257905	0.025128	0.11438	0.286573	0.705892	1.04408	1.2649	0.62934	0.495055	0.435655
WB: p-IRE1 (S724)	0.757377	1.05222	0.45403	0.502523	0.886505	0.382051	1.4964	1.19038	1.58082	0.212532	0.339987	0.235077
WB: IRE1	0.899821	0.707857	0.646749	0.489841	0.553609	0.389021	0.300121	0.460809	0.593464	0.60638	0.804912	0.829834
	OIL+EV	OIL+EV	OIL+EV	OIL+CR	OIL+CR	OIL+CR	CCL4+EV	CCL4+EV	CCL4+EV	CCl4+CR	CCl4+CR	CCl4+CR
WB:p-p38MAPK	0.505656	0.398961	0.495014	0.942378	0.430729	0.541186	1.71072	1.63195	1.91541	0.511106	0.485863	0.381326
WB:P38MAPK	0.454204	0.615727	0.554673	0.868676	0.694537	0.647714	0.890195	0.413732	0.430337	0.380717	0.51865	0.382515
WB:p-SMAD2/3	0.073919	0.244777	0.3971	0.45252	0.584212	0.279696	1.17738	1.44469	1.70699	0.394587	0.037926	0.074736
WB:SMAD2/3	0.502808	0.627021	0.784228	0.762261	0.713293	0.821949	0.541952	0.66406	0.740376	0.778638	0.631953	0.182954
		Tukey HSD	Tukey HSD	Tukey HSD				Tukey HSD	Tukey HSD	Tukey HSD					Tukey HSD	Tukey HSD	Tukey HSD
Co-immunoprecipitation	Treatment pair	Q statistic	p-value	inferfence		Co-immunoprecipitation	Treatment pair	Q statistic	p-value	inferfence			Protein	Treatment pair	Q statistic	p-value	inferfence
IP:collagen WB:BIP	Oil+CR vs. Oil+EV	0.6735	0.899995	insignificant		IP:IRE1 WB:HSP47	Oil+CR vs. Oil+EV	1.1343	0.837425	insignificant			WB:p-p38MAPK	Oil+CR vs. Oil+EV	1.86	0.574917	insignificant
IP:collagen WB:BIP	CCl4+EV vs. Oil+EV	6.5133	0.0362594	*p<0.05		IP:IRE1 WB:HSP47	CCl4+EV vs. Oil+EV	6.8132	0.0057894	** p<0.01			WB:p-p38MAPK	CCl4+EV vs. Oil+EV	13.9442	0.0010053	** p<0.01
IP:collagen WB:BIP	CCl4+CR vs. Oil+EV	2.6646	0.306226	insignificant		IP:IRE1 WB:HSP47	CCl4+CR vs. Oil+EV	2.347	0.402707	insignificant			WB:p-p38MAPK	CCl4+CR vs. Oil+EV	0.0771	0.899995	insignificant
IP:collagen WB:BIP	CCl4+CR vs. CCl4+EV	6.3966	0.0083916	** p<0.01		IP:IRE1 WB:HSP47	CCl4+CR vs. CCl4+EV	7.252	0.0408231	*p<0.05			WB:p-p38MAPK	CCl4+CR vs. CCl4+EV	14.0214	0.0010053	** p<0.01
IP:collagen WB:BIP	CCL4+CR vs. OIL+CR	6.3966	0.0083916	** p<0.01		IP:IRE1 WB:HSP47	CCL4+CR vs. OIL+CR	4.4663	0.0532374	insignificant			WB:p-p38MAPK	CCL4+CR vs. OIL+CR	1.9371	0.547027	insignificant
		Tukey HSD	Tukey HSD	Tukey HSD				Tukey HSD	Tukey HSD	Tukey HSD					Tukey HSD	Tukey HSD	Tukey HSD
Protein	Treatment pair	Q statistic	p-value	inferfence		Protein	Treatment pair	Q statistic	p-value	inferfence			Protein	Treatment pair	Q statistic	p-value	inferfence
WB: BIP	Oil+CR vs. Oil+EV	1.4821	0.711614	insignificant		WB: p-IRE1 (S724)	Oil+CR vs. Oil+EV	1.254	0.794115	insignificant			WB:P38MAPK	Oil+CR vs. Oil+EV	2.1453	0.472232	insignificant
WB: BIP	CCl4+EV vs. Oil+EV	4.2798	0.0261569	*p<0.05		WB: p-IRE1 (S724)	CCl4+EV vs. Oil+EV	5.1021	0.0284184	* p<0.05			WB:P38MAPK	CCl4+EV vs. Oil+EV	0.4012	0.899995	insignificant
WB: BIP	CCl4+CR vs. Oil+EV	3.2907	0.0344499	*p<0.05		WB: p-IRE1 (S724)	CCl4+CR vs. Oil+EV	3.7579	0.107948	insignificant			WB:P38MAPK	CCl4+CR vs. Oil+EV	1.254	0.794127	insignificant
WB: BIP	CCl4+CR vs. CCl4+EV	0.9891	0.88996	insignificant		WB: p-IRE1 (S724)	CCl4+CR vs. CCl4+EV	8.86	0.0010928	** p<0.01			WB:P38MAPK	CCl4+CR vs. CCl4+EV	1.7441	0.61685	insignificant
WB: BIP	CCL4+CR vs. OIL+CR	1.8087	0.593472	insignificant		WB: p-IRE1 (S724)	CCL4+CR vs. OIL+CR	2.5039	0.352502	insignificant			WB:P38MAPK	CCL4+CR vs. OIL+CR	3.3993	0.153689	insignificant
															1.6552	0.648985	insignificant
								Tukey HSD	Tukey HSD	Tukey HSD
						Protein	Treatment pair	Q statistic	p-value	inferfence					Tukey HSD	Tukey HSD	Tukey HSD
						WB: IRE1	Oil+CR vs. Oil+EV	3.8461	0.0988632	insignificant			Protein	Treatment pair	Q statistic	p-value	inferfence
						WB: IRE1	CCl4+EV vs. Oil+EV	4.2114	0.0686628	insignificant			WB:p-SMAD2/3	Oil+CR vs. Oil+EV	1.7445	0.616703	insignificant
						WB: IRE1	CCl4+CR vs. Oil+EV	0.0622	0.899995	insignificant			WB:p-SMAD2/3	CCl4+EV vs. Oil+EV	10.4943	0.0010053	** p<0.01
						WB: IRE1	CCl4+CR vs. CCl4+EV	4.1492	0.0730741	insignificant			WB:p-SMAD2/3	CCl4+CR vs. Oil+EV	0.6057	0.899995	insignificant
						WB: IRE1	CCL4+CR vs. OIL+CR	3.7838	0.105199	insignificant			WB:p-SMAD2/3	CCl4+CR vs. CCl4+EV	11.1	0.0010053	** p<0.01
													WB:p-SMAD2/3	CCL4+CR vs. OIL+CR	2.3502	0.401647	insignificant
															Tukey HSD	Tukey HSD	Tukey HSD
													Protein	Treatment pair	Q statistic	p-value	inferfence
													WB:SMAD2/3	Oil+CR vs. Oil+EV	1.2318	0.802139	insignificant
													WB:SMAD2/3	CCl4+EV vs. Oil+EV	0.1039	0.899995	insignificant
													WB:SMAD2/3	CCl4+CR vs. Oil+EV	1.0297	0.875271	insignificant
													WB:SMAD2/3	CCl4+CR vs. CCl4+EV	1.1335	0.837702	insignificant
													WB:SMAD2/3	CCL4+CR vs. OIL+CR	2.2615	0.431651	insignificant

## Sheet: fig 7C
Figure 7C	OIL+EV	OIL+EV	OIL+EV	OIL+CR	OIL+CR	OIL+CR	CCl4+EV	CCl4+EV	CCl4+EV	CCL4+CR	CCL4+CR	CCL4+CR
BIP	0.710012	0.889945	0.753825	1.20758	1.09413	0.684789	2.60184	1.54784	2.03094	0.997585	0.793162	0.577238
p-IRE1 (S724)	0.514121	0.491603	0.524016	0.949086	0.700082	0.495254	1.55173	1.27988	1.30455	0.54509	0.392272	0.314492
IRE1	1.027	0.945915	1.31772	1.37383	1.23179	0.877575	1.24012	1.61436	1.47592	1.43812	1.92912	1.55937
				Tukey HSD	Tukey HSD	Tukey HSD
		Protein	Treatment pair	Q statistic	p-value	inferfence
		WB: BIP	Oil+CR vs. Oil+EV	1.1452	0.83347	insignificant
		WB: BIP	CCl4+EV vs. Oil+EV	6.9267	0.0052419	** p<0.01
		WB: BIP	CCl4+CR vs. Oil+EV	0.0257	0.899995	insignificant
		WB: BIP	CCl4+CR vs. CCl4+EV	6.9009	0.0053615	** p<0.01
		WB: BIP	CCL4+CR vs. OIL+CR	1.1195	0.842769	insignificant
				Tukey HSD	Tukey HSD	Tukey HSD
		Protein	Treatment pair	Q statistic	p-value	inferfence
		WB: p-IRE1 (S724)	Oil+CR vs. Oil+EV	2.3887	0.38897	insignificant
		WB: p-IRE1 (S724)	CCl4+EV vs. Oil+EV	10.1286	0.0010053	** p<0.01
		WB: p-IRE1 (S724)	CCl4+CR vs. Oil+EV	1.0799	0.85711	insignificant
		WB: p-IRE1 (S724)	CCl4+CR vs. CCl4+EV	11.2084	0.0010053	** p<0.01
		WB: p-IRE1 (S724)	CCL4+CR vs. OIL+CR	3.4685	0.143581	insignificant
				Tukey HSD	Tukey HSD	Tukey HSD
		Protein	Treatment pair	Q statistic	p-value	inferfence
		WB: IRE1	Oil+CR vs. Oil+EV	0.4914	0.899995	insignificant
		WB: IRE1	CCl4+EV vs. Oil+EV	2.6533	0.309292	insignificant
		WB: IRE1	CCl4+CR vs. Oil+EV	4.1747	0.0712319	insignificant
		WB: IRE1	CCl4+CR vs. CCl4+EV	1.5214	0.697391	insignificant
		WB: IRE1	CCL4+CR vs. OIL+CR	3.6833	0.116271	insignificant

## Sheet: fig 7D
Figure 7D	OIL+EV	OIL+EV	OIL+EV	OIL+EV	OIL+CR	OIL+CR	OIL+CR	OIL+CR	CCl4+EV	CCl4+EV	CCl4+EV	CCl4+EV	CCl4+CR	CCl4+CR	CCl4+CR	CCl4+CR
IL-17	0.713606	0.696843	0.732931	0.719682	0.757512	0.739672	0.470774	0.451906	1.50402	1.51571	1.22192	1.48678	0.63122	0.641445	0.401849	0.414822
IL-1B	0.131527	0.201639	0.102152	0.157566	0.21068	0.279858	0.114265	0.15697	0.336713	0.406786	0.295314	0.192149	0.144955	0.202832	0.090063	0.163495
IL-6	0.326822	0.240402	0.12323	0.054926	0.058602	0.01763	0.10879	0.001085	0.754806	0.682265	0.723402	0.857675	0.119724	0.063588	0.155373	0.08415
IL-10	1.12273	1.3063	0.936342	1.08143	0.250184	0.433009	1.06823	1.26159	0.169181	0.380548	0.254471	0.261329	1.40681	1.57434	2.05301	2.26713
					Tukey HSD	Tukey HSD	Tukey HSD
			Protein	Treatment pair	Q statistic	p-value	inferfence
			IL-17	Oil+CR vs. Oil+EV	1.7385	0.612453	insignificant
			IL-17	CCl4+EV vs. Oil+EV	11.2398	0.0010053	** p<0.01
			IL-17	CCl4+CR vs. Oil+EV	3.035	0.193844	insignificant
			IL-17	CCl4+CR vs. CCl4+EV	14.2748	0.0010053	** p<0.01
			IL-17	CCL4+CR vs. OIL+CR	1.2965	0.779042	insignificant
					Tukey HSD	Tukey HSD	Tukey HSD
			Protein	Treatment pair	Q statistic	p-value	inferfence
			IL-1B	Oil+CR vs. Oil+EV	1.2899	0.781525	insignificant
			IL-1B	CCl4+EV vs. Oil+EV	4.8735	0.0217589	* p<0.05
			IL-1B	CCl4+CR vs. Oil+EV	0.0646	0.899995	insignificant
			IL-1B	CCl4+CR vs. CCl4+EV	4.8089	0.0235694	* p<0.05
			IL-1B	CCL4+CR vs. OIL+CR	1.2253	0.805883	insignificant
					Tukey HSD	Tukey HSD	Tukey HSD
			Protein	Treatment pair	Q statistic	p-value	inferfence
			IL-6	Oil+CR vs. Oil+EV	3.596	0.102988	insignificant
			IL-6	CCl4+EV vs. Oil+EV	14.6134	0.0010053	** p<0.01
			IL-6	CCl4+CR vs. Oil+EV	2.0739	0.486037	insignificant
			IL-6	CCl4+CR vs. CCl4+EV	16.6873	0.0010053	** p<0.01
			IL-6	CCL4+CR vs. OIL+CR	1.5221	0.694016	insignificant
					Tukey HSD	Tukey HSD	Tukey HSD
			Protein	Treatment pair	Q statistic	p-value	inferfence
			IL-10	Oil+CR vs. Oil+EV	2.1859	0.444068	insignificant
			IL-10	CCl4+EV vs. Oil+EV	5.1549	0.0153558	* p<0.05
			IL-10	CCl4+CR vs. Oil+EV	4.3518	0.0414647	* p<0.05
			IL-10	CCl4+CR vs. CCl4+EV	9.5067	0.0010053	** p<0.01
			IL-10	CCL4+CR vs. OIL+CR	6.5377	0.0028464	** p<0.01

## Sheet: fig 7E
Figure 7E	OIL+EV	OIL+EV	OIL+EV	OIL+EV	OIL+CR	OIL+CR	OIL+CR	OIL+CR	CCl4+EV	CCl4+EV	CCl4+EV	CCl4+EV	CCl4+CR	CCl4+CR	CCl4+CR	CCl4+CR
BIP/GRP78	0.410534	0.29116	0.353911	0.240742	0.348831	0.35845	0.348831	0.35845	1.25073	1.53374	1.25073	1.53374	0.622814	0.612016	0.615571	0.61135
p-IRE1 alpha	0.094737	0.092001	0.180483	0.180483	0.273434	0.273434	0.389457	0.389457	1.44352	1.44352	1.92756	1.89657	0.604358	0.385603	0.533347	0.36678
IRE1	1.06854	0.859088	1.31398	1.11284	2.16684	1.97033	1.44598	1.27402	2.00035	2.10722	2.57401	2.28578	1.67829	1.49912	1.8049	1.59891
				Tukey HSD	Tukey HSD	Tukey HSD
		Protein	Treatment pair	Q statistic	p-value	inferfence
		WB: BIP	Oil+CR vs. Oil+EV	0.6586	0.899995	insignificant
		WB: BIP	CCl4+EV vs. Oil+EV	23.8028	0.0010053	** p<0.01
		WB: BIP	CCl4+CR vs. Oil+EV	6.4925	0.0030035	** p<0.01
		WB: BIP	CCl4+CR vs. CCl4+EV	17.3103	0.0010053	** p<0.01
		WB: BIP	CCL4+CR vs. OIL+CR	5.834	0.0066522	** p<0.01
				Tukey HSD	Tukey HSD	Tukey HSD
		Protein	Treatment pair	Q statistic	p-value	inferfence
		WB: p-IRE1 (S724)	Oil+CR vs. Oil+EV	2.5428	0.320758	insignificant
		WB: p-IRE1 (S724)	CCl4+EV vs. Oil+EV	20.1428	0.0010053	** p<0.01
		WB: p-IRE1 (S724)	CCl4+CR vs. Oil+EV	4.387	0.0397053	* p<0.05
		WB: p-IRE1 (S724)	CCl4+CR vs. CCl4+EV	1.8442	0.572609	insignificant
		WB: p-IRE1 (S724)	CCL4+CR vs. OIL+CR	15.7557	0.0010053	** p<0.01
				Tukey HSD	Tukey HSD	Tukey HSD
		Protein	Treatment pair	Q statistic	p-value	inferfence
		WB: IRE1	Oil+CR vs. Oil+EV	4.6225	0.0296925	* p<0.05
		WB: IRE1	CCl4+EV vs. Oil+EV	8.5199	0.0010053	** p<0.01
		WB: IRE1	CCl4+CR vs. Oil+EV	4.1128	0.0555601	insignificant
		WB: IRE1	CCl4+CR vs. CCl4+EV	4.4071	0.0387343	* p<0.05
		WB: IRE1	CCL4+CR vs. OIL+CR	0.5097	0.899995	insignificant
