# Supplementary material for: Targeting A-kinase anchoring protein 12 phosphorylation in hepatic stellate cells regulates liver injury and fibrosis in mouse models
Source: eLife. 2022 Oct 4;11:e78430. doi: 10.7554/eLife.78430 (PMC9531947; doi:10.7554/eLife.78430)
Supplement: Supplementary file 2. — Genomic DNA of HSCs isolated from oil or CCl4 injected mice treated with AKAP12 PDEL CRISPR +GFAP-Cas9 or LRAT-Cas9 were submitted for NGS to Azenta Life Sciences as described under methods. Hepatocytes from PDEL CRISPR +GFAP-Cas9 were also processed as above for NGS. Representative raw reads of WT, deletion or base changes are shown for each data set and summarized in the first summary tab of the excel. [file elife-78430-supp2.xlsx]

## Sheet: SUMMARY sheet
Liver cell+promoter Cas9	ID	Sample
HSC-GFAP-Cas9	A1	Oil+EV
	A2	Oil+CR
	A3	CCl4+EV
	A4	CCl4+CR
Hepatocyte-GFAP Cas9	A5	Oil+EV
	A6	Oil+CR
	A7	CCl4+EV
	A8	CCl4+CR
HSC-LRAT Cas9	A9	Oil+EV
	A10	Oil+CR
	A11	CCl4+EV
	A12	CCl4+CR

## Sheet: A1-Oil+EV GFAP
Reference sequence	Target sequence	Reads	Type	TargetAA	ReferenceAA
GTCAAGAGTGCCACCTTGTCCTCCACGGAGAGCACGGCGTCTGGAATGCAGGATGAGGTCAGAGCGGTTGGCGAGGAGCAAAGGTCAGAGGAGCCAAAGCGCAGGGTGGATACTTCAGTGTCTTGGGAGGCGTTGATTTGTGTCGGATCGTCCAAGAAGAGAGCGAGGAAGGCATCCTCTTCAGATGATGAAGGAGGGCCAAGAACACTGGGAGGGGATGGCCACAGAGCGGAGGAGGCTAGCAAAGACAAAGAAG	GTCAAGAGTGCCACCTTGTCCTCCACGGAGAGCACGGCGTCTGGAATGCAGGATGAGGTCAGAGCGGTTGGCGAGGAGCAAAGGTCAGAGGAGCCAAAGCGCAGGGTGGATACTTCAGTGTCTTGGGAGGCGTTGATTTGTGTCGGATCGTCCAAGAAGAGAGCGAGGAAGGCATCCTCTTCAGATGATGAAGGAGGGCCAAGAACACTGGGAGGGGATGGCCACAGAGCGGAGGAGGCTAGCAAAGACAAAGAAG	158634	WT	VKSATLSSTESTASGMQDEVRAVGEEQRSEEPKRRVDTSVSWEALICVGSSKKRARKASSSDDEGGPRTLGGDGHRAEEASKDKE	VKSATLSSTESTASGMQDEVRAVGEEQRSEEPKRRVDTSVSWEALICVGSSKKRARKASSSDDEGGPRTLGGDGHRAEEASKDKE
GTCAAAAGTGCCACCTTGTCCTCCACGGAGAGCACGGCGTCTGGAATGCAGGATGAGGTCAGAGCGGTTGGCGAGGAGCAAAGGTCAGAGGAGCCAAGGCGCAGGGTGGATACTTCAGTGTCTTGGGAGGCGTTGATTTGTGTCGGATCGTCCAAGAAGAGAGCGAGGAAGGCATCCTCTTCAGATGATGAAGGAGGGCCAAGAACACTGGGAGGGGATGGCCACAGAGCGGAGGAGGCTAGCAAAGACAAAGAAG	GTCAAAAGTGCCACCTTGTCCTCCACGGAGAGCACGGCGTCTGGAATGCAGGATGAGGTCAGAGCGGTTGGCGAGGAGCAAAGGTCAGAGGAGCCAAGGCGCAGGGTGGATACTTCAGTGTCTTGGGAGGCGTTGATTTGTGTCGGATCGTCCAAGAAGAGAGCGAGGAAGGCATCCTCTTCAGATGATGAAGGAGGGCCAAGAACACTGGGAGGGGATGGCCACAGAGCGGAGGAGGCTAGCAAAGACAAAGAAG	1	2 Base Changes	VKSATLSSTESTASGMQDEVRAVGEEQRSEEPRRRVDTSVSWEALICVGSSKKRARKASSSDDEGGPRTLGGDGHRAEEASKDKE	VKSATLSSTESTASGMQDEVRAVGEEQRSEEPKRRVDTSVSWEALICVGSSKKRARKASSSDDEGGPRTLGGDGHRAEEASKDKE
GTCAAAAGTGCCACCTTGTCCTCCACGGAGAGCACGGCGTTTGGAATGCAGGATGAGGTCAGAGCGGTTGGCGAGGAGCAAAGGTCAGAGGAGCCAAAGCGCAGGGTGGATACTTCAGTGTCTTGGGAGGCGTTGATTTGTGCCAGGTCGTCCAAGAAGAGAGCGAGGAAGGCATCCTCTTCAGATGATGAAGGAGGGCCAAGAACACTGGGAGGGGATGGCCACAGAGCGGAGGAGGCTAGCAAAGACAAAGAAG	GTCAAAAGTGCCACCTTGTCCTCCACGGAGAGCACGGCGTTTGGAATGCAGGATGAGGTCAGAGCGGTTGGCGAGGAGCAAAGGTCAGAGGAGCCAAAGCGCAGGGTGGATACTTCAGTGTCTTGGGAGGCGTTGATTTGTGCCAGGTCGTCCAAGAAGAGAGCGAGGAAGGCATCCTCTTCAGATGATGAAGGAGGGCCAAGAACACTGGGAGGGGATGGCCACAGAGCGGAGGAGGCTAGCAAAGACAAAGAAG	1	5 Base Changes	VKSATLSSTESTAFGMQDEVRAVGEEQRSEEPKRRVDTSVSWEALICARSSKKRARKASSSDDEGGPRTLGGDGHRAEEASKDKE	VKSATLSSTESTASGMQDEVRAVGEEQRSEEPKRRVDTSVSWEALICVGSSKKRARKASSSDDEGGPRTLGGDGHRAEEASKDKE
GTCAACAGTGACACCTTGTCCTCCACGGAGAGCACGGCGTCTGGAATGCAGGATGAGGTCAGAGCGGTTGGCGAGGAGCAAAGGTCAGAGGAGCCAAAGCGCAGGGTGGATACTTCAGTGTCTTGGGAGGCGTTGATTTGTGTCGGATCGTCCAAGAAGAGAGCGAGGAAGGCATCCTCTTCAGATGATGAAGGAGGGCCAAGAACACTGGGAGGGGATGGCCACAGAGCGGAGGAGGCTAGCAAAGACAAAGAAG	GTCAACAGTGACACCTTGTCCTCCACGGAGAGCACGGCGTCTGGAATGCAGGATGAGGTCAGAGCGGTTGGCGAGGAGCAAAGGTCAGAGGAGCCAAAGCGCAGGGTGGATACTTCAGTGTCTTGGGAGGCGTTGATTTGTGTCGGATCGTCCAAGAAGAGAGCGAGGAAGGCATCCTCTTCAGATGATGAAGGAGGGCCAAGAACACTGGGAGGGGATGGCCACAGAGCGGAGGAGGCTAGCAAAGACAAAGAAG	1	2 Base Changes	VNSDTLSSTESTASGMQDEVRAVGEEQRSEEPKRRVDTSVSWEALICVGSSKKRARKASSSDDEGGPRTLGGDGHRAEEASKDKE	VKSATLSSTESTASGMQDEVRAVGEEQRSEEPKRRVDTSVSWEALICVGSSKKRARKASSSDDEGGPRTLGGDGHRAEEASKDKE
GTCAACAGTGCCAACTTGTACTCCACGGAGAGCACGGCGTCTGGAATGCAGGATGAGGTGAGAGCGGTTGGCGAGGAGCAAAGGACAGAGGAGCCAAAGCGCAGGGTGGATACTTCAGTGTCTTGTGAGGCGTTGATTTGTGTCGGATCGTCCAAGAAGAGAGCGAGGAAGGCATCCTCTTCAGATGATGAAGGAGGGCCAAGAACACTGGGAGGGGATGGCCACAGAGCGGAGGAGGCTAGCAAAGACAAAGAAG	GTCAACAGTGCCAACTTGTACTCCACGGAGAGCACGGCGTCTGGAATGCAGGATGAGGTGAGAGCGGTTGGCGAGGAGCAAAGGACAGAGGAGCCAAAGCGCAGGGTGGATACTTCAGTGTCTTGTGAGGCGTTGATTTGTGTCGGATCGTCCAAGAAGAGAGCGAGGAAGGCATCCTCTTCAGATGATGAAGGAGGGCCAAGAACACTGGGAGGGGATGGCCACAGAGCGGAGGAGGCTAGCAAAGACAAAGAAG	1	6 Base Changes	VNSANLYSTESTASGMQDEVRAVGEEQRTEEPKRRVDTSVSCEALICVGSSKKRARKASSSDDEGGPRTLGGDGHRAEEASKDKE	VKSATLSSTESTASGMQDEVRAVGEEQRSEEPKRRVDTSVSWEALICVGSSKKRARKASSSDDEGGPRTLGGDGHRAEEASKDKE
GTCAACAGTGCCACCATCTCCTCCACGGAGAGCACGGCGTCTGGAATGCAGGATGAGGTCAGAGCGGTTGGCGAGGAGCAAAGGTCAGAGGAGCCAAAGCGCAGGGTGGATACTTCAGTGTCTTGGGAGGCGTTGATTTGTGTCGGATCGTCCAAGAAGAGAGCGAGGAAGGCATCCTCTTCAGATGATGAAGGAGGGCCAAGAACACTGGGAGGGGATGGCCACAGAGCGGAGGAGGCTTGGAAAGACAAAGAAG	GTCAACAGTGCCACCATCTCCTCCACGGAGAGCACGGCGTCTGGAATGCAGGATGAGGTCAGAGCGGTTGGCGAGGAGCAAAGGTCAGAGGAGCCAAAGCGCAGGGTGGATACTTCAGTGTCTTGGGAGGCGTTGATTTGTGTCGGATCGTCCAAGAAGAGAGCGAGGAAGGCATCCTCTTCAGATGATGAAGGAGGGCCAAGAACACTGGGAGGGGATGGCCACAGAGCGGAGGAGGCTTGGAAAGACAAAGAAG	1	5 Base Changes	VNSATISSTESTASGMQDEVRAVGEEQRSEEPKRRVDTSVSWEALICVGSSKKRARKASSSDDEGGPRTLGGDGHRAEEAWKDKE	VKSATLSSTESTASGMQDEVRAVGEEQRSEEPKRRVDTSVSWEALICVGSSKKRARKASSSDDEGGPRTLGGDGHRAEEASKDKE
GTCAACAGTGCCACCATGTACTCCACGGAGAGCACGGCGTCTGGAATGCAGGATGAGGTCAGAGCGGTTGGCGAGGAGCAAAGGTCAGAGGAGCCAAAGCGCAGGGTGGATACTTCAGTGTCTTGGGAGGCGTTGATTTGTGTCGGATCGTCCAAGAAGAGAGCGAGGAAGGCATCCTCTTCAGATGATGAAGGAGGGCCAAGAACACTGGGAGGGGATGGCCACAAAGCGGAGGAGGCTAGCAAAGACAAAGAAG	GTCAACAGTGCCACCATGTACTCCACGGAGAGCACGGCGTCTGGAATGCAGGATGAGGTCAGAGCGGTTGGCGAGGAGCAAAGGTCAGAGGAGCCAAAGCGCAGGGTGGATACTTCAGTGTCTTGGGAGGCGTTGATTTGTGTCGGATCGTCCAAGAAGAGAGCGAGGAAGGCATCCTCTTCAGATGATGAAGGAGGGCCAAGAACACTGGGAGGGGATGGCCACAAAGCGGAGGAGGCTAGCAAAGACAAAGAAG	1	4 Base Changes	VNSATMYSTESTASGMQDEVRAVGEEQRSEEPKRRVDTSVSWEALICVGSSKKRARKASSSDDEGGPRTLGGDGHKAEEASKDKE	VKSATLSSTESTASGMQDEVRAVGEEQRSEEPKRRVDTSVSWEALICVGSSKKRARKASSSDDEGGPRTLGGDGHRAEEASKDKE
GTCAACAGTGCCACCATGTCCACCACGGAGAGCACGGCGTCTGGAATGCAGGATGAGGTCAGAGGGGTTGGGGTGGAGCATAGGTGAGAGGAGCCTAAGCGCTGGGTGGATTCTTCAGTGTCTTGGGAGGCGTTGTTTTGTGTCGGATCGTCCAAGAAGAGAGCGAGGAAGGCATCCTCTTCAGATGATGAAGGAGGGCCAAGAACACTGGGTGGGGATGGCCACAGAGCGGAGGAGGCTAGCAAAGACAAAGAAG	GTCAACAGTGCCACCATGTCCACCACGGAGAGCACGGCGTCTGGAATGCAGGATGAGGTCAGAGGGGTTGGGGTGGAGCATAGGTGAGAGGAGCCTAAGCGCTGGGTGGATTCTTCAGTGTCTTGGGAGGCGTTGTTTTGTGTCGGATCGTCCAAGAAGAGAGCGAGGAAGGCATCCTCTTCAGATGATGAAGGAGGGCCAAGAACACTGGGTGGGGATGGCCACAGAGCGGAGGAGGCTAGCAAAGACAAAGAAG	1	13 Base Changes	VNSATMSTTESTASGMQDEVRGVGVEHR*	VKSATLSSTESTASGMQDEVRAVGEEQRSEEPKRRVDTSVSWEALICVGSSKKRARKASSSDDEGGPRTLGGDGHRAEEASKDKE
GTCAACAGTGCCACCATTTCATCCACGGAGATCACGGCGTCAGGAATTCAGGATGAGGTCAGAGCGGTTGGAGAGGAGCAAAGGTCAGAGGAGCCTAAGCGCAGGGTGGATACTTCAGTGTCTTGGGAGGCGTTGATTTGTGTCGGATCGTCCAAGAAGAGAGCGAGGAAGGCATCCTCTTCAGATGATGAAGGAGGGCCAAGAACACTGGGAGGGGATGGCCACAGAGCGGAGGAGGCTAGCAAAGACAAAGAAG	GTCAACAGTGCCACCATTTCATCCACGGAGATCACGGCGTCAGGAATTCAGGATGAGGTCAGAGCGGTTGGAGAGGAGCAAAGGTCAGAGGAGCCTAAGCGCAGGGTGGATACTTCAGTGTCTTGGGAGGCGTTGATTTGTGTCGGATCGTCCAAGAAGAGAGCGAGGAAGGCATCCTCTTCAGATGATGAAGGAGGGCCAAGAACACTGGGAGGGGATGGCCACAGAGCGGAGGAGGCTAGCAAAGACAAAGAAG	1	9 Base Changes	VNSATISSTEITASGIQDEVRAVGEEQRSEEPKRRVDTSVSWEALICVGSSKKRARKASSSDDEGGPRTLGGDGHRAEEASKDKE	VKSATLSSTESTASGMQDEVRAVGEEQRSEEPKRRVDTSVSWEALICVGSSKKRARKASSSDDEGGPRTLGGDGHRAEEASKDKE
GTCAACAGTGCCACCATTTCCTCCACGGAGAGCACGGCGTCTGGAATGCAGGATGAGGTCAGAGCGGTTGGCGAGGAGCAAAGGTCAGAGGAGCCAAAGCGCAGGGTGGATACTTCAGTGTCTTGGGAGGCGTTGATTTGTGTCGGATCGTCCAAGAAGAGAGCGAGGAAGGCATCCTCTTCAGATGATGAAGGAGGGCCAAGAACACTGGGAGGGGATGGCCACAGAGCGGAGGAGGCTAGCAAAGACAAAGAAG	GTCAACAGTGCCACCATTTCCTCCACGGAGAGCACGGCGTCTGGAATGCAGGATGAGGTCAGAGCGGTTGGCGAGGAGCAAAGGTCAGAGGAGCCAAAGCGCAGGGTGGATACTTCAGTGTCTTGGGAGGCGTTGATTTGTGTCGGATCGTCCAAGAAGAGAGCGAGGAAGGCATCCTCTTCAGATGATGAAGGAGGGCCAAGAACACTGGGAGGGGATGGCCACAGAGCGGAGGAGGCTAGCAAAGACAAAGAAG	1	3 Base Changes	VNSATISSTESTASGMQDEVRAVGEEQRSEEPKRRVDTSVSWEALICVGSSKKRARKASSSDDEGGPRTLGGDGHRAEEASKDKE	VKSATLSSTESTASGMQDEVRAVGEEQRSEEPKRRVDTSVSWEALICVGSSKKRARKASSSDDEGGPRTLGGDGHRAEEASKDKE
GTCAACAGTGCCACCTTGTCATCCACGGAGAGCACGGCGTCTGGAATGCAGGATGAGGTCAGAGCGGTTGGCGAGGAGCAAAGGTCAGATGAGCAAAAGCGCAGGGTGGACACTTCAGTGTCTTGGGAGGCGTTGATTTGTGTCGGATCGTCCAAGAAGAGAGCGAGGAAGGCATCCTCTTCAGATGATGAAGGAGGGCCAGGAACACTGGGAGGGGATGGCCACAGAGCGGAGGAGGCTAGCAAAGACTAAGAAG	GTCAACAGTGCCACCTTGTCATCCACGGAGAGCACGGCGTCTGGAATGCAGGATGAGGTCAGAGCGGTTGGCGAGGAGCAAAGGTCAGATGAGCAAAAGCGCAGGGTGGACACTTCAGTGTCTTGGGAGGCGTTGATTTGTGTCGGATCGTCCAAGAAGAGAGCGAGGAAGGCATCCTCTTCAGATGATGAAGGAGGGCCAGGAACACTGGGAGGGGATGGCCACAGAGCGGAGGAGGCTAGCAAAGACTAAGAAG	1	7 Base Changes	VNSATLSSTESTASGMQDEVRAVGEEQRSDEQKRRVDTSVSWEALICVGSSKKRARKASSSDDEGGPGTLGGDGHRAEEASKD*	VKSATLSSTESTASGMQDEVRAVGEEQRSEEPKRRVDTSVSWEALICVGSSKKRARKASSSDDEGGPRTLGGDGHRAEEASKDKE
GTCAACAGTGCCACCTTGTCCACCACGGAGAGCACGGCGTCTGGAATGCAGGATGAGGTCAGAGCGGTTGGCGAGGAGCAAAGGTCAGAGGAGCCAAAGCGCAGGGTGGATACTTCAGTGTCTTGGGAGGCGTTGATTTGTGTCGGATCGTCCAAGAAGAGAGAGAGGAAGGCATCCTCTTCAGATGATGAAGGAGGGCCAAGAACACTGGGAGGGGATGGCCACAGAGCGGAGGAGGCTAGCAAAGACAAAGAAG	GTCAACAGTGCCACCTTGTCCACCACGGAGAGCACGGCGTCTGGAATGCAGGATGAGGTCAGAGCGGTTGGCGAGGAGCAAAGGTCAGAGGAGCCAAAGCGCAGGGTGGATACTTCAGTGTCTTGGGAGGCGTTGATTTGTGTCGGATCGTCCAAGAAGAGAGAGAGGAAGGCATCCTCTTCAGATGATGAAGGAGGGCCAAGAACACTGGGAGGGGATGGCCACAGAGCGGAGGAGGCTAGCAAAGACAAAGAAG	1	3 Base Changes	VNSATLSTTESTASGMQDEVRAVGEEQRSEEPKRRVDTSVSWEALICVGSSKKRERKASSSDDEGGPRTLGGDGHRAEEASKDKE	VKSATLSSTESTASGMQDEVRAVGEEQRSEEPKRRVDTSVSWEALICVGSSKKRARKASSSDDEGGPRTLGGDGHRAEEASKDKE
GTCAACAGTGCCACCTTGTCCACCACGGAGAGCACGGCGTCTGGAATGCAGGATGAGGTCAGAGCGGTTGGCGAGGAGCAAAGGTCAGAGGAGCCAAAGCGCAGGGTGGATACTTCAGTGTCTTGGGAGGCGTTGATTTGTGTCGGATCGTCCAAGAAGAGAGCGAGGAAGGCATCCTCTTAAGATGATGAAGGAGGGCCAAGAACACTGGGAGGGGATGGCCACAGAGCGGAGGAGGCTAGCAAAGACAAAGAAG	GTCAACAGTGCCACCTTGTCCACCACGGAGAGCACGGCGTCTGGAATGCAGGATGAGGTCAGAGCGGTTGGCGAGGAGCAAAGGTCAGAGGAGCCAAAGCGCAGGGTGGATACTTCAGTGTCTTGGGAGGCGTTGATTTGTGTCGGATCGTCCAAGAAGAGAGCGAGGAAGGCATCCTCTTAAGATGATGAAGGAGGGCCAAGAACACTGGGAGGGGATGGCCACAGAGCGGAGGAGGCTAGCAAAGACAAAGAAG	1	3 Base Changes	VNSATLSTTESTASGMQDEVRAVGEEQRSEEPKRRVDTSVSWEALICVGSSKKRARKASS*	VKSATLSSTESTASGMQDEVRAVGEEQRSEEPKRRVDTSVSWEALICVGSSKKRARKASSSDDEGGPRTLGGDGHRAEEASKDKE
GTCAACAGTGCCACCTTGTCCTCCACGGAGAGCACGGCGTCTGGAATGCAGGATGAGGTCAGAGCGGGTGGCGAGGAGCAAAGGTCAGAGGAGCCAATGCGCAGGGTGGATACTTCAGTGTCTTGGGAGGCGTTGATTTGTGTCTGATCGTCCAAGAAGAGAGCGAGGAAGGCATCCTCTTCAGATGATGAAGGAGGGCCAAGAACACTGGGAGGGGATGGCCACAGAGCGGAGGAGGCTAGCAAAGACAAAGAAG	GTCAACAGTGCCACCTTGTCCTCCACGGAGAGCACGGCGTCTGGAATGCAGGATGAGGTCAGAGCGGGTGGCGAGGAGCAAAGGTCAGAGGAGCCAATGCGCAGGGTGGATACTTCAGTGTCTTGGGAGGCGTTGATTTGTGTCTGATCGTCCAAGAAGAGAGCGAGGAAGGCATCCTCTTCAGATGATGAAGGAGGGCCAAGAACACTGGGAGGGGATGGCCACAGAGCGGAGGAGGCTAGCAAAGACAAAGAAG	1	4 Base Changes	VNSATLSSTESTASGMQDEVRAGGEEQRSEEPMRRVDTSVSWEALICV*	VKSATLSSTESTASGMQDEVRAVGEEQRSEEPKRRVDTSVSWEALICVGSSKKRARKASSSDDEGGPRTLGGDGHRAEEASKDKE
GTCAACAGTGCCACCTTGTCCTCCACGGAGAGCACGGCGTCTGGAATGCAGGATGAGGTCAGAGCGGTTGGCGAGGAGCAAAGGTCAGAGGAGCCAAAGCGCAGGGTGGATACTTCAGTGTCTTGGGAGGCGTTGATTTGTGTCGGATCGTCCAAGAAGAGAGCGAGGAAGGCATCCTCTTCAGATGATGAAGGAGGGCCAAGAACACTGGGAGGGGATTGCCACAGAGCGGAGGAGGCTAGCAAAGACAAAGAAG	GTCAACAGTGCCACCTTGTCCTCCACGGAGAGCACGGCGTCTGGAATGCAGGATGAGGTCAGAGCGGTTGGCGAGGAGCAAAGGTCAGAGGAGCCAAAGCGCAGGGTGGATACTTCAGTGTCTTGGGAGGCGTTGATTTGTGTCGGATCGTCCAAGAAGAGAGCGAGGAAGGCATCCTCTTCAGATGATGAAGGAGGGCCAAGAACACTGGGAGGGGATTGCCACAGAGCGGAGGAGGCTAGCAAAGACAAAGAAG	1	2 Base Changes	VNSATLSSTESTASGMQDEVRAVGEEQRSEEPKRRVDTSVSWEALICVGSSKKRARKASSSDDEGGPRTLGGDCHRAEEASKDKE	VKSATLSSTESTASGMQDEVRAVGEEQRSEEPKRRVDTSVSWEALICVGSSKKRARKASSSDDEGGPRTLGGDGHRAEEASKDKE
GTCAACAGTGCCACCTTGTCCTCCACGGAGAGCACGGCGTCTGGAATGCAGGATGAGGTCAGAGCGGTTGGCGAGGAGCAAAGGTCAGAGGAGCCAATGCGCAGGGTGGATACTTCAGTGTCTTGGGAGGCGTTGATTTGTGTCTGATCGTCCAAGAAGAGAGCGAGGAAGGCATCCTCTTCAGATGATGAAGGAGGGCCAAGAACACTGGGAGGGGATTGCCACAGAGCGGAGGAGGCTAGCAAAGACAAAGAAG	GTCAACAGTGCCACCTTGTCCTCCACGGAGAGCACGGCGTCTGGAATGCAGGATGAGGTCAGAGCGGTTGGCGAGGAGCAAAGGTCAGAGGAGCCAATGCGCAGGGTGGATACTTCAGTGTCTTGGGAGGCGTTGATTTGTGTCTGATCGTCCAAGAAGAGAGCGAGGAAGGCATCCTCTTCAGATGATGAAGGAGGGCCAAGAACACTGGGAGGGGATTGCCACAGAGCGGAGGAGGCTAGCAAAGACAAAGAAG	1	4 Base Changes	VNSATLSSTESTASGMQDEVRAVGEEQRSEEPMRRVDTSVSWEALICV*	VKSATLSSTESTASGMQDEVRAVGEEQRSEEPKRRVDTSVSWEALICVGSSKKRARKASSSDDEGGPRTLGGDGHRAEEASKDKE
GTCAACAGTGCCACCTTGTCCTCCTCGGAGAGCACGGCGTCTGGAATGCAGGATGAGGTCAGAGCGGTTGGCGAGGAGCAAAGGTCAGAGGAGCCAAAGCGCAGGGTGGATACTTCAGTGTCTTGGGAGGCGTTGATTTGTGTCGGATCGTCCAAGAAGAGAGCGAGGAAGGCATCCTCTTCAGATGATGAAGGAGGGCCAAGAACACTGGGAGGGGATGGCCACAGAGCGGAGGAGGCTAGCGAAGACAAAGAAG	GTCAACAGTGCCACCTTGTCCTCCTCGGAGAGCACGGCGTCTGGAATGCAGGATGAGGTCAGAGCGGTTGGCGAGGAGCAAAGGTCAGAGGAGCCAAAGCGCAGGGTGGATACTTCAGTGTCTTGGGAGGCGTTGATTTGTGTCGGATCGTCCAAGAAGAGAGCGAGGAAGGCATCCTCTTCAGATGATGAAGGAGGGCCAAGAACACTGGGAGGGGATGGCCACAGAGCGGAGGAGGCTAGCGAAGACAAAGAAG	1	3 Base Changes	VNSATLSSSESTASGMQDEVRAVGEEQRSEEPKRRVDTSVSWEALICVGSSKKRARKASSSDDEGGPRTLGGDGHRAEEASEDKE	VKSATLSSTESTASGMQDEVRAVGEEQRSEEPKRRVDTSVSWEALICVGSSKKRARKASSSDDEGGPRTLGGDGHRAEEASKDKE
GTCAAGAATGCCACCTTGCCCTCCACGGAGAGCACGGCGTCTGGAATGCAGGATGAGGTCAGAGCGGTTGGCGAGGAGCAAAGGTCAGAGGAGCCAAAGCGCAGGGTGGATACTTCAGTGTCTTGGGAGGCGTTGATTTGTGTCGGATCGTCCAAGAAGAGAGCGAGGAAGGCATCCTCTTCAGATGATGAAGGAGGGCCAAGAACACTGGGAGGGGATGGCCACAGAGCGGAGGAGGCTAGCAAAGACAAAGAAG	GTCAAGAATGCCACCTTGCCCTCCACGGAGAGCACGGCGTCTGGAATGCAGGATGAGGTCAGAGCGGTTGGCGAGGAGCAAAGGTCAGAGGAGCCAAAGCGCAGGGTGGATACTTCAGTGTCTTGGGAGGCGTTGATTTGTGTCGGATCGTCCAAGAAGAGAGCGAGGAAGGCATCCTCTTCAGATGATGAAGGAGGGCCAAGAACACTGGGAGGGGATGGCCACAGAGCGGAGGAGGCTAGCAAAGACAAAGAAG	1	2 Base Changes	VKNATLPSTESTASGMQDEVRAVGEEQRSEEPKRRVDTSVSWEALICVGSSKKRARKASSSDDEGGPRTLGGDGHRAEEASKDKE	VKSATLSSTESTASGMQDEVRAVGEEQRSEEPKRRVDTSVSWEALICVGSSKKRARKASSSDDEGGPRTLGGDGHRAEEASKDKE
GTCAAGAATGCCACCTTGTCATCCACGGAGAGCACGGCGTCTGGAATGCAGGATGAGGTCAGAGCGGTTGGCGAGGAGCAAAGGTCAGAGGAGCCAAAGCGCAGGGTGGATACTTCAGTGTCTTGGGAGGCGTTGATTTGTGTCGGATCGTCCAAGAAGAGAGCGAGGAAGGCATCCTCTTCAGATGATGAAGGAGGGCCAAGAACACTGGGTGGGGATGGCCACAGAGCGGAGGAGGCTAGCAAAGACAAAGAAG	GTCAAGAATGCCACCTTGTCATCCACGGAGAGCACGGCGTCTGGAATGCAGGATGAGGTCAGAGCGGTTGGCGAGGAGCAAAGGTCAGAGGAGCCAAAGCGCAGGGTGGATACTTCAGTGTCTTGGGAGGCGTTGATTTGTGTCGGATCGTCCAAGAAGAGAGCGAGGAAGGCATCCTCTTCAGATGATGAAGGAGGGCCAAGAACACTGGGTGGGGATGGCCACAGAGCGGAGGAGGCTAGCAAAGACAAAGAAG	1	3 Base Changes	VKNATLSSTESTASGMQDEVRAVGEEQRSEEPKRRVDTSVSWEALICVGSSKKRARKASSSDDEGGPRTLGGDGHRAEEASKDKE	VKSATLSSTESTASGMQDEVRAVGEEQRSEEPKRRVDTSVSWEALICVGSSKKRARKASSSDDEGGPRTLGGDGHRAEEASKDKE
GTCAAGAATGCCACCTTGTCCTCCACGGAGAGCACGGCGTCTGGAATGCAGGATGAGGTCAGAGCGGTTGGCGAGGAGCAAAGGTCAGAGGAGCCAAAGCGCAGGGTGGATACTTCAGTGTCTTGGGAGGCGTTGATTTGTGTCGGATCGTCCAAGAAGAGAGCGAGGAAGGCATCCTCTTCAGATGATGAAGGAGGGCCAAGAACACTGGGAGGGGATGGCCACAGAGCGGAGGAGGCTAGCGAAGACAAAGAAG	GTCAAGAATGCCACCTTGTCCTCCACGGAGAGCACGGCGTCTGGAATGCAGGATGAGGTCAGAGCGGTTGGCGAGGAGCAAAGGTCAGAGGAGCCAAAGCGCAGGGTGGATACTTCAGTGTCTTGGGAGGCGTTGATTTGTGTCGGATCGTCCAAGAAGAGAGCGAGGAAGGCATCCTCTTCAGATGATGAAGGAGGGCCAAGAACACTGGGAGGGGATGGCCACAGAGCGGAGGAGGCTAGCGAAGACAAAGAAG	1	2 Base Changes	VKNATLSSTESTASGMQDEVRAVGEEQRSEEPKRRVDTSVSWEALICVGSSKKRARKASSSDDEGGPRTLGGDGHRAEEASEDKE	VKSATLSSTESTASGMQDEVRAVGEEQRSEEPKRRVDTSVSWEALICVGSSKKRARKASSSDDEGGPRTLGGDGHRAEEASKDKE
GTCAAGAATGCCACCTTGTCCTCCACGGAGAGCACGGCGTCTGGAATGCAGGATGAGGTCAGAGCGGTTGGCGAGGAGCAAAGGTCAGAGGAGCCAAAGCGCAGGGTGGATACTTCAGTGTCTTGGGAGGCGTTGATTTGTGTCGGATCGTCCAAGAAGAGAGCGAGGAAGGCATCCTCTTCAGATGATGAAGGAGGGCCAAGAACACTGGGAGGGGATGGCCACAGAGCGGAGGAGGTTAGCAAAGACAAAGAAG	GTCAAGAATGCCACCTTGTCCTCCACGGAGAGCACGGCGTCTGGAATGCAGGATGAGGTCAGAGCGGTTGGCGAGGAGCAAAGGTCAGAGGAGCCAAAGCGCAGGGTGGATACTTCAGTGTCTTGGGAGGCGTTGATTTGTGTCGGATCGTCCAAGAAGAGAGCGAGGAAGGCATCCTCTTCAGATGATGAAGGAGGGCCAAGAACACTGGGAGGGGATGGCCACAGAGCGGAGGAGGTTAGCAAAGACAAAGAAG	1	2 Base Changes	VKNATLSSTESTASGMQDEVRAVGEEQRSEEPKRRVDTSVSWEALICVGSSKKRARKASSSDDEGGPRTLGGDGHRAEEVSKDKE	VKSATLSSTESTASGMQDEVRAVGEEQRSEEPKRRVDTSVSWEALICVGSSKKRARKASSSDDEGGPRTLGGDGHRAEEASKDKE
GTCAAGAATGCCACCTTGTCCTCCACGGAGAGCACGGCGTCTGGAATGCAGGATGAGGTCAGAGCGGTTGGCGAGGAGCAAAGGTCAGAGGAGCCAAAGCGCAGGGTGGATACTTCAGTGTCTTGGGAGGCGTTGATTTGTGTCGGATCGTCCAAGAAGAGAGCGAGGAAGGCATCCTCTTCAGATGATGAAGGAGGGCCGAGAACACTGGGAGGGGATGGCCACAGAGCGGAGGAGGCTAGCAAAGACAAAGAAG	GTCAAGAATGCCACCTTGTCCTCCACGGAGAGCACGGCGTCTGGAATGCAGGATGAGGTCAGAGCGGTTGGCGAGGAGCAAAGGTCAGAGGAGCCAAAGCGCAGGGTGGATACTTCAGTGTCTTGGGAGGCGTTGATTTGTGTCGGATCGTCCAAGAAGAGAGCGAGGAAGGCATCCTCTTCAGATGATGAAGGAGGGCCGAGAACACTGGGAGGGGATGGCCACAGAGCGGAGGAGGCTAGCAAAGACAAAGAAG	1	2 Base Changes	VKNATLSSTESTASGMQDEVRAVGEEQRSEEPKRRVDTSVSWEALICVGSSKKRARKASSSDDEGGPRTLGGDGHRAEEASKDKE	VKSATLSSTESTASGMQDEVRAVGEEQRSEEPKRRVDTSVSWEALICVGSSKKRARKASSSDDEGGPRTLGGDGHRAEEASKDKE
GTCAAGAATGCCACCTTGTCCTCCACGGAGAGCACGGCGTCTGGAATGCAGGATGAGGTCAGAGCGGTTGGCGAGGAGCAAAGGTCAGAGGAGCCAAAGCGCAGGGTGGATACTTCAGTGTCTTGGGAGGCGTTGATTTGTGTCGGATCGTCCAAGGAGAGAGCGAGGAAGGCATCCTCTTCAGATGATGAAGGAGGGCCAAGAACACTGGGAGGGGATGGCCACAGAGCGGAGGAGGCTAGCAAAGACAAAGAAG	GTCAAGAATGCCACCTTGTCCTCCACGGAGAGCACGGCGTCTGGAATGCAGGATGAGGTCAGAGCGGTTGGCGAGGAGCAAAGGTCAGAGGAGCCAAAGCGCAGGGTGGATACTTCAGTGTCTTGGGAGGCGTTGATTTGTGTCGGATCGTCCAAGGAGAGAGCGAGGAAGGCATCCTCTTCAGATGATGAAGGAGGGCCAAGAACACTGGGAGGGGATGGCCACAGAGCGGAGGAGGCTAGCAAAGACAAAGAAG	1	2 Base Changes	VKNATLSSTESTASGMQDEVRAVGEEQRSEEPKRRVDTSVSWEALICVGSSKERARKASSSDDEGGPRTLGGDGHRAEEASKDKE	VKSATLSSTESTASGMQDEVRAVGEEQRSEEPKRRVDTSVSWEALICVGSSKKRARKASSSDDEGGPRTLGGDGHRAEEASKDKE
GTCAAGAATGCCACCTTGTCCTCCACGGAGAGCACGGCGTCTGGAATGCAGGATGAGGTCAGAGCGGTTGGCGAGGAGCAAAGGTCAGAGGAGCCAAAGCGCAGGGTGGATACTTCAGTGTCTTGGGAGGCGTTGATTTGTGTCGGATCGTCCGAGAAGAGAGCGAGGAAGGCATCCTCTTCAGATGATGAAGGAGGGCCAAGAACACTGGGAGGGGATGGCCACAGAGCGGAGGAGGCTAGCAAAGACAAAGAAG	GTCAAGAATGCCACCTTGTCCTCCACGGAGAGCACGGCGTCTGGAATGCAGGATGAGGTCAGAGCGGTTGGCGAGGAGCAAAGGTCAGAGGAGCCAAAGCGCAGGGTGGATACTTCAGTGTCTTGGGAGGCGTTGATTTGTGTCGGATCGTCCGAGAAGAGAGCGAGGAAGGCATCCTCTTCAGATGATGAAGGAGGGCCAAGAACACTGGGAGGGGATGGCCACAGAGCGGAGGAGGCTAGCAAAGACAAAGAAG	1	2 Base Changes	VKNATLSSTESTASGMQDEVRAVGEEQRSEEPKRRVDTSVSWEALICVGSSEKRARKASSSDDEGGPRTLGGDGHRAEEASKDKE	VKSATLSSTESTASGMQDEVRAVGEEQRSEEPKRRVDTSVSWEALICVGSSKKRARKASSSDDEGGPRTLGGDGHRAEEASKDKE
GTCAAGAATGCCACCTTGTCCTCCACGGAGAGCACGGCGTCTGGAATGCAGGATGAGGTCAGAGCGGTTGGCGAGGAGCAAAGGTCAGAGGAGCCAAAGCGCAGGGTGGATGCTTCAGTGTCTTGGGAGGCGTTGATTTGTGTCGGATCGTCCAAGAAGAGAGCGAGGAAGGCATCCTCTTCAGATGATGAAGGGGGGCCAAGAACACTGGGAGGGGATGGCCACAGAGCGGAGGAGGCTAGCAAAGACAAAGAAG	GTCAAGAATGCCACCTTGTCCTCCACGGAGAGCACGGCGTCTGGAATGCAGGATGAGGTCAGAGCGGTTGGCGAGGAGCAAAGGTCAGAGGAGCCAAAGCGCAGGGTGGATGCTTCAGTGTCTTGGGAGGCGTTGATTTGTGTCGGATCGTCCAAGAAGAGAGCGAGGAAGGCATCCTCTTCAGATGATGAAGGGGGGCCAAGAACACTGGGAGGGGATGGCCACAGAGCGGAGGAGGCTAGCAAAGACAAAGAAG	1	3 Base Changes	VKNATLSSTESTASGMQDEVRAVGEEQRSEEPKRRVDASVSWEALICVGSSKKRARKASSSDDEGGPRTLGGDGHRAEEASKDKE	VKSATLSSTESTASGMQDEVRAVGEEQRSEEPKRRVDTSVSWEALICVGSSKKRARKASSSDDEGGPRTLGGDGHRAEEASKDKE
GTCAAGAATGCCACCTTGTCCTCCACGGAGAGCACGGCGTCTGGAATGCAGGATGAGGTCAGAGCGGTTGGCGAGGAGCAAAGGTCAGAGGAGCCAAAGCGCGGGGTGGATACTTCAGCGTCTTGGGAGGCGTTGATTTGTGTCGGATCGTCCAAGAAGAGAGCGAGGAAGGCATCCTCTTCAGATGATGAAGGAGGGCCAAGAACACTGGGAGGGGATGGCCACAGAGCGGAGGAGGCTAGCAAAGACAAAGAAG	GTCAAGAATGCCACCTTGTCCTCCACGGAGAGCACGGCGTCTGGAATGCAGGATGAGGTCAGAGCGGTTGGCGAGGAGCAAAGGTCAGAGGAGCCAAAGCGCGGGGTGGATACTTCAGCGTCTTGGGAGGCGTTGATTTGTGTCGGATCGTCCAAGAAGAGAGCGAGGAAGGCATCCTCTTCAGATGATGAAGGAGGGCCAAGAACACTGGGAGGGGATGGCCACAGAGCGGAGGAGGCTAGCAAAGACAAAGAAG	1	3 Base Changes	VKNATLSSTESTASGMQDEVRAVGEEQRSEEPKRGVDTSASWEALICVGSSKKRARKASSSDDEGGPRTLGGDGHRAEEASKDKE	VKSATLSSTESTASGMQDEVRAVGEEQRSEEPKRRVDTSVSWEALICVGSSKKRARKASSSDDEGGPRTLGGDGHRAEEASKDKE
GTCAAGAATGCCACCTTGTCCTCCACGGAGAGCACGGCGTCTGGAATGCAGGATGAGGTCAGAGCGGTTGGCGAGGAGCAAAGGTCAGAGGATCCAAAGCGCAGGGTGGATACTTCAGTGTCTTGGGAGGCGTTGATTTGTGTCGGATCGTCCAAGAAGAGAGCGAGGAAGGCATCCTCTTCAGATGATGAAGGAGGGCCAAGAACACTGGGAGGGGATGGCCACAGAGCGGAGGAGGCGAGCAAAGACAAAGAAG	GTCAAGAATGCCACCTTGTCCTCCACGGAGAGCACGGCGTCTGGAATGCAGGATGAGGTCAGAGCGGTTGGCGAGGAGCAAAGGTCAGAGGATCCAAAGCGCAGGGTGGATACTTCAGTGTCTTGGGAGGCGTTGATTTGTGTCGGATCGTCCAAGAAGAGAGCGAGGAAGGCATCCTCTTCAGATGATGAAGGAGGGCCAAGAACACTGGGAGGGGATGGCCACAGAGCGGAGGAGGCGAGCAAAGACAAAGAAG	1	3 Base Changes	VKNATLSSTESTASGMQDEVRAVGEEQRSEDPKRRVDTSVSWEALICVGSSKKRARKASSSDDEGGPRTLGGDGHRAEEASKDKE	VKSATLSSTESTASGMQDEVRAVGEEQRSEEPKRRVDTSVSWEALICVGSSKKRARKASSSDDEGGPRTLGGDGHRAEEASKDKE
GTCAAGAATGCCACCTTGTCCTCCACGGAGAGCACGGCGTCTGGAATGCAGGATGAGGTCAGAGCGGTTGGCGAGGAGCAAAGGTCAGGGGAGCCAAAGCGCAGGGTGGATACTTCAGTGTCTTGGGAGGCGTTGATTTGTGTCGGATCGTCCAAGAAGAGAGCGAGGAAGGCATCCTCTTCAGATGATGAAGGAGGGCCAAGAACACTGGGAGGGGATGGCCACAGAGCGGAGGAGGCTAGCAAAGACAAAGAAG	GTCAAGAATGCCACCTTGTCCTCCACGGAGAGCACGGCGTCTGGAATGCAGGATGAGGTCAGAGCGGTTGGCGAGGAGCAAAGGTCAGGGGAGCCAAAGCGCAGGGTGGATACTTCAGTGTCTTGGGAGGCGTTGATTTGTGTCGGATCGTCCAAGAAGAGAGCGAGGAAGGCATCCTCTTCAGATGATGAAGGAGGGCCAAGAACACTGGGAGGGGATGGCCACAGAGCGGAGGAGGCTAGCAAAGACAAAGAAG	1	2 Base Changes	VKNATLSSTESTASGMQDEVRAVGEEQRSGEPKRRVDTSVSWEALICVGSSKKRARKASSSDDEGGPRTLGGDGHRAEEASKDKE	VKSATLSSTESTASGMQDEVRAVGEEQRSEEPKRRVDTSVSWEALICVGSSKKRARKASSSDDEGGPRTLGGDGHRAEEASKDKE
GTCAAGAATGCCACCTTGTCCTCCACGGAGAGCACGGCGTCTGGAATGCAGGATGAGGTCAGAGCGGTTGGCGAGGGGCAAAGGTCAGAGGAGCCAAAGCGCAGGGTGGATACTTCAGTGTCTTGGGAGGCGTTGATTTGTGTCGGATCGTCCAAGAAGAGAGCGAGGAAGGCATCCTCTTCAGATGATGAAGGAGGGCCAAGAACACTGGGAGGGGATGGCCACAGAGCGGAGGAGGCTAGCAAAGACAAAGAAG	GTCAAGAATGCCACCTTGTCCTCCACGGAGAGCACGGCGTCTGGAATGCAGGATGAGGTCAGAGCGGTTGGCGAGGGGCAAAGGTCAGAGGAGCCAAAGCGCAGGGTGGATACTTCAGTGTCTTGGGAGGCGTTGATTTGTGTCGGATCGTCCAAGAAGAGAGCGAGGAAGGCATCCTCTTCAGATGATGAAGGAGGGCCAAGAACACTGGGAGGGGATGGCCACAGAGCGGAGGAGGCTAGCAAAGACAAAGAAG	1	2 Base Changes	VKNATLSSTESTASGMQDEVRAVGEGQRSEEPKRRVDTSVSWEALICVGSSKKRARKASSSDDEGGPRTLGGDGHRAEEASKDKE	VKSATLSSTESTASGMQDEVRAVGEEQRSEEPKRRVDTSVSWEALICVGSSKKRARKASSSDDEGGPRTLGGDGHRAEEASKDKE
GTCAAGACTGCAACCTTGTCCTCCACGGAGAGCACGGCGTCTGGAATGCAGGATGAGGTCAGAGCGGTTGGCGAGGAGCAAAGGTCAGATGAGCCAAAGCGCAGGGTGGATACTTCAGTGTCTTGGGAGGCGTTGATTTGTGTCGGATCGTCCAAGAAGAGAGCGAGGAAGGCATCCTCTTAAGATGATGAAGGAGGGCCAAGAACACTGGGAGGGGATGGCCACAGTGCGGAGGAGGCTAGCAAAGACAAAGAAG	GTCAAGACTGCAACCTTGTCCTCCACGGAGAGCACGGCGTCTGGAATGCAGGATGAGGTCAGAGCGGTTGGCGAGGAGCAAAGGTCAGATGAGCCAAAGCGCAGGGTGGATACTTCAGTGTCTTGGGAGGCGTTGATTTGTGTCGGATCGTCCAAGAAGAGAGCGAGGAAGGCATCCTCTTAAGATGATGAAGGAGGGCCAAGAACACTGGGAGGGGATGGCCACAGTGCGGAGGAGGCTAGCAAAGACAAAGAAG	1	5 Base Changes	VKTATLSSTESTASGMQDEVRAVGEEQRSDEPKRRVDTSVSWEALICVGSSKKRARKASS*	VKSATLSSTESTASGMQDEVRAVGEEQRSEEPKRRVDTSVSWEALICVGSSKKRARKASSSDDEGGPRTLGGDGHRAEEASKDKE
GTCAAGACTGCAACCTTGTCCTCCACGGAGAGCACGGCGTCTGGAATGCAGGATGAGGTCAGAGCGGTTTGCGAGGAGCAAAGGTCAGAGGAGCCAAAGCGAAGGGTGGATACTTCAGTGTCTTGGGAGGCGTTGATTTGTGTCGGATCGTCCAAGAAGAGAGCGAGGAAGGCATCCTCTTCAGATGATGAAGGAGGGCCAAGAAAACTGGGAGGGGATGGCCACAGAGCGGAGGTGGCTAGCAAAGACAAAGAAG	GTCAAGACTGCAACCTTGTCCTCCACGGAGAGCACGGCGTCTGGAATGCAGGATGAGGTCAGAGCGGTTTGCGAGGAGCAAAGGTCAGAGGAGCCAAAGCGAAGGGTGGATACTTCAGTGTCTTGGGAGGCGTTGATTTGTGTCGGATCGTCCAAGAAGAGAGCGAGGAAGGCATCCTCTTCAGATGATGAAGGAGGGCCAAGAAAACTGGGAGGGGATGGCCACAGAGCGGAGGTGGCTAGCAAAGACAAAGAAG	1	6 Base Changes	VKTATLSSTESTASGMQDEVRAVCEEQRSEEPKRRVDTSVSWEALICVGSSKKRARKASSSDDEGGPRKLGGDGHRAEVASKDKE	VKSATLSSTESTASGMQDEVRAVGEEQRSEEPKRRVDTSVSWEALICVGSSKKRARKASSSDDEGGPRTLGGDGHRAEEASKDKE
GTCAAGACTGCCACCTCGTCCTCCACGGAGAGCACGGCGTCTGGAATGCAGGATGAGGTCAGAGCGGTTGGCGAGGAGCAAAGGTCAGAGGAGCCAAAGCGCAGGGTGGATACTTCAGTGTCTTGGGAGGCGTTGATTTGTGTCGGATCGTCCAAGAAGAGAGCGAGGAAGGCATCCTCTTCAGATGATGAAGGAGGGCCAAGAACACTGGGAGGGGATGGCCACAGAGCGGAGGAGGCTAGCAAAGACAAAGAAG	GTCAAGACTGCCACCTCGTCCTCCACGGAGAGCACGGCGTCTGGAATGCAGGATGAGGTCAGAGCGGTTGGCGAGGAGCAAAGGTCAGAGGAGCCAAAGCGCAGGGTGGATACTTCAGTGTCTTGGGAGGCGTTGATTTGTGTCGGATCGTCCAAGAAGAGAGCGAGGAAGGCATCCTCTTCAGATGATGAAGGAGGGCCAAGAACACTGGGAGGGGATGGCCACAGAGCGGAGGAGGCTAGCAAAGACAAAGAAG	1	2 Base Changes	VKTATSSSTESTASGMQDEVRAVGEEQRSEEPKRRVDTSVSWEALICVGSSKKRARKASSSDDEGGPRTLGGDGHRAEEASKDKE	VKSATLSSTESTASGMQDEVRAVGEEQRSEEPKRRVDTSVSWEALICVGSSKKRARKASSSDDEGGPRTLGGDGHRAEEASKDKE
GTCAAGACTGCCACCTTGTCCACCACGGAGAGCACGGCGTCTGGAATGCAGGATGAGGTCAGAGCGGTTGGCGAGGAGCAAAGGTCAGAGGAGCCAAAGCGCAGGGTGGATACTTCAGTGTCTTGGGAGGCGTTGATTTGTGTCGGATCGTCCATGAAGAGAGCGAGGAAGGCATCCTCTTCAGATGATGAAGGAGGGCCAAGAACAGTGGGAGGGGATGGCCACAGAGGGGAGGAGGCTAGCAAATACAAAGAAG	GTCAAGACTGCCACCTTGTCCACCACGGAGAGCACGGCGTCTGGAATGCAGGATGAGGTCAGAGCGGTTGGCGAGGAGCAAAGGTCAGAGGAGCCAAAGCGCAGGGTGGATACTTCAGTGTCTTGGGAGGCGTTGATTTGTGTCGGATCGTCCATGAAGAGAGCGAGGAAGGCATCCTCTTCAGATGATGAAGGAGGGCCAAGAACAGTGGGAGGGGATGGCCACAGAGGGGAGGAGGCTAGCAAATACAAAGAAG	1	6 Base Changes	VKTATLSTTESTASGMQDEVRAVGEEQRSEEPKRRVDTSVSWEALICVGSSMKRARKASSSDDEGGPRTVGGDGHRGEEASKYKE	VKSATLSSTESTASGMQDEVRAVGEEQRSEEPKRRVDTSVSWEALICVGSSKKRARKASSSDDEGGPRTLGGDGHRAEEASKDKE
GTCAAGACTGCCACCTTGTCCTCCACGGAGAGCACGGCGTCTGGAAGGCAGGATGAGGTCAGAGCGGTTGGCGAGGAGCAAAGGTCAGAGGAGCCAAAGCGCAGGGTGGATACTTCAGTGTCTTGGGAGGCGTTGATTTGTGTCGGATCGTCCAAGAAGAGAGCGAGGAAGGCATCCTCTTCAGATGATGAAGGAGGGCCAAGAACACTGGGAGGGGATGGCCACAGAGCGGAGGAGGCTAGCAAAGACAAAGAAG	GTCAAGACTGCCACCTTGTCCTCCACGGAGAGCACGGCGTCTGGAAGGCAGGATGAGGTCAGAGCGGTTGGCGAGGAGCAAAGGTCAGAGGAGCCAAAGCGCAGGGTGGATACTTCAGTGTCTTGGGAGGCGTTGATTTGTGTCGGATCGTCCAAGAAGAGAGCGAGGAAGGCATCCTCTTCAGATGATGAAGGAGGGCCAAGAACACTGGGAGGGGATGGCCACAGAGCGGAGGAGGCTAGCAAAGACAAAGAAG	1	2 Base Changes	VKTATLSSTESTASGRQDEVRAVGEEQRSEEPKRRVDTSVSWEALICVGSSKKRARKASSSDDEGGPRTLGGDGHRAEEASKDKE	VKSATLSSTESTASGMQDEVRAVGEEQRSEEPKRRVDTSVSWEALICVGSSKKRARKASSSDDEGGPRTLGGDGHRAEEASKDKE
GTCAAGACTGCCACCTTGTCCTCCACGGAGAGCACGGCGTCTGGAATGCAGGATGAGGTCAGAGCGGTTGGCGAGGAGCATAGGTCAGAGGAGCCAAAGCGCAGGGCGGATACTTCAGTGTCTTGGGAGGCGTTGATTTGTGTCGGATCGTCCAAGAAGAGAGCGAGGGAGGCTTCCTCTTCAGATGATGAAGGAGGGCCAAGAACACTGGGAGGGGATGGCCACAGAGCGGAGGAGGCTAGCGAAGACAAAGAAG	GTCAAGACTGCCACCTTGTCCTCCACGGAGAGCACGGCGTCTGGAATGCAGGATGAGGTCAGAGCGGTTGGCGAGGAGCATAGGTCAGAGGAGCCAAAGCGCAGGGCGGATACTTCAGTGTCTTGGGAGGCGTTGATTTGTGTCGGATCGTCCAAGAAGAGAGCGAGGGAGGCTTCCTCTTCAGATGATGAAGGAGGGCCAAGAACACTGGGAGGGGATGGCCACAGAGCGGAGGAGGCTAGCGAAGACAAAGAAG	1	6 Base Changes	VKTATLSSTESTASGMQDEVRAVGEEHRSEEPKRRADTSVSWEALICVGSSKKRAREASSSDDEGGPRTLGGDGHRAEEASEDKE	VKSATLSSTESTASGMQDEVRAVGEEQRSEEPKRRVDTSVSWEALICVGSSKKRARKASSSDDEGGPRTLGGDGHRAEEASKDKE
GTCAAGACTGCCACCTTGTCCTCCACGGAGAGCACGGCGTCTGGAATGCAGGATGAGGTCAGAGCGGTTGGCGAGGAGCATAGGTCAGAGGAGCCAAAGCGCAGGGTGGATACTTCAGTGTCTTGGGAGGCGTTGATTTGTGTCGGATCGTCCAAGAAGAGAGCGAGGAAGGCATCCTCTTCAGATGATGAAGGAGGGCCAAGAACACTGGGAGGTGATGGCCACAGAGCGGAGGAGGCTAGCAAAGACAAAGAAG	GTCAAGACTGCCACCTTGTCCTCCACGGAGAGCACGGCGTCTGGAATGCAGGATGAGGTCAGAGCGGTTGGCGAGGAGCATAGGTCAGAGGAGCCAAAGCGCAGGGTGGATACTTCAGTGTCTTGGGAGGCGTTGATTTGTGTCGGATCGTCCAAGAAGAGAGCGAGGAAGGCATCCTCTTCAGATGATGAAGGAGGGCCAAGAACACTGGGAGGTGATGGCCACAGAGCGGAGGAGGCTAGCAAAGACAAAGAAG	1	3 Base Changes	VKTATLSSTESTASGMQDEVRAVGEEHRSEEPKRRVDTSVSWEALICVGSSKKRARKASSSDDEGGPRTLGGDGHRAEEASKDKE	VKSATLSSTESTASGMQDEVRAVGEEQRSEEPKRRVDTSVSWEALICVGSSKKRARKASSSDDEGGPRTLGGDGHRAEEASKDKE
GTCAAGACTGCCACCTTGTCCTCCACGGAGAGCACGGCGTCTGGAATGCAGGATGAGGTCAGAGCGGTTGGCGATGAGCAAAGGTCAGAGGAGCCAAAGCGCAGGGTGGATACTTCAGTGTCTTGGGAGGCGTTGATTTGTGTCGGATCGTCCAAGAAGAGAGCGAGGAAGGCATCCTCTTCAGATGATGAAGGAGGGCCAAGAACACTGGGAGGGGATGGCCACAGAGCGGAGGAGGCTAGCAAAGACAAAGAAG	GTCAAGACTGCCACCTTGTCCTCCACGGAGAGCACGGCGTCTGGAATGCAGGATGAGGTCAGAGCGGTTGGCGATGAGCAAAGGTCAGAGGAGCCAAAGCGCAGGGTGGATACTTCAGTGTCTTGGGAGGCGTTGATTTGTGTCGGATCGTCCAAGAAGAGAGCGAGGAAGGCATCCTCTTCAGATGATGAAGGAGGGCCAAGAACACTGGGAGGGGATGGCCACAGAGCGGAGGAGGCTAGCAAAGACAAAGAAG	1	2 Base Changes	VKTATLSSTESTASGMQDEVRAVGDEQRSEEPKRRVDTSVSWEALICVGSSKKRARKASSSDDEGGPRTLGGDGHRAEEASKDKE	VKSATLSSTESTASGMQDEVRAVGEEQRSEEPKRRVDTSVSWEALICVGSSKKRARKASSSDDEGGPRTLGGDGHRAEEASKDKE
GTCAAGACTGCCACCTTGTCCTCCACGGAGAGCACGGCGTCTGGAATGCAGGATGAGGTCAGATCGGTTGGCGAGGAGCAAAGGTCAGAGGAGCCAAAGCGCAGGGTGGATACTTCAGTGTCTTGGGAGGCGTTGATTTGTGTCGGATCGTCCAAGAAGAGAGCGAGGAAGGCATCCTCTTCAGATGATGAAGGAGGGCCAAGAACACTGGGAGGGGAAGGCCACAGAGCGGGGGAGGCTAGCAAAGACAAAGAAG	GTCAAGACTGCCACCTTGTCCTCCACGGAGAGCACGGCGTCTGGAATGCAGGATGAGGTCAGATCGGTTGGCGAGGAGCAAAGGTCAGAGGAGCCAAAGCGCAGGGTGGATACTTCAGTGTCTTGGGAGGCGTTGATTTGTGTCGGATCGTCCAAGAAGAGAGCGAGGAAGGCATCCTCTTCAGATGATGAAGGAGGGCCAAGAACACTGGGAGGGGAAGGCCACAGAGCGGGGGAGGCTAGCAAAGACAAAGAAG	1	4 Base Changes	VKTATLSSTESTASGMQDEVRSVGEEQRSEEPKRRVDTSVSWEALICVGSSKKRARKASSSDDEGGPRTLGGEGHRAGEASKDKE	VKSATLSSTESTASGMQDEVRAVGEEQRSEEPKRRVDTSVSWEALICVGSSKKRARKASSSDDEGGPRTLGGDGHRAEEASKDKE
GTCAAGACTGCCACCTTGTCCTCCACGGAGAGCACGGCGTCTGTAATGCAGGATGAGGTCAGAGAGGTTGGCGAGGAGCAAAGGTCAGAGGAGCCAAAGCGCAGGGTGGATACTTCAGTGTCTTGGGAGGCGTTGATTTGTGTCGGATCGTCCAAGAAGAGAGCGAGGAAGGCATCCTCTTCAGATGATGAAGGAGGGCCAAGAACACTGGGAGGGGATGGCCACAGAGCGGAGGAGGCTAGCAAAGACAAAGAAG	GTCAAGACTGCCACCTTGTCCTCCACGGAGAGCACGGCGTCTGTAATGCAGGATGAGGTCAGAGAGGTTGGCGAGGAGCAAAGGTCAGAGGAGCCAAAGCGCAGGGTGGATACTTCAGTGTCTTGGGAGGCGTTGATTTGTGTCGGATCGTCCAAGAAGAGAGCGAGGAAGGCATCCTCTTCAGATGATGAAGGAGGGCCAAGAACACTGGGAGGGGATGGCCACAGAGCGGAGGAGGCTAGCAAAGACAAAGAAG	1	3 Base Changes	VKTATLSSTESTASVMQDEVREVGEEQRSEEPKRRVDTSVSWEALICVGSSKKRARKASSSDDEGGPRTLGGDGHRAEEASKDKE	VKSATLSSTESTASGMQDEVRAVGEEQRSEEPKRRVDTSVSWEALICVGSSKKRARKASSSDDEGGPRTLGGDGHRAEEASKDKE
GTCAAGAGAGACACCTTGTCCTCCACGGAGAGCACGGCGTCTGGAATGCAGGATGAGGTCAGAGCGGTTGGCGAGGAGCAAAGGTCAGAGGAGCCAAAGCGCAGGGTGGATACTTCAGTGTCTTGGGAGGCGTTGATTTGTGTCGGATCGTCCAAGAAGAGAGCGAGGAAGGCATCCTCTTCAGATGATGAAGGAGGGCCAAGAACACTGGGAGGGGATGGCCACAGAGCGGAGGAGGCTAGCAAAGACAAAGAAG	GTCAAGAGAGACACCTTGTCCTCCACGGAGAGCACGGCGTCTGGAATGCAGGATGAGGTCAGAGCGGTTGGCGAGGAGCAAAGGTCAGAGGAGCCAAAGCGCAGGGTGGATACTTCAGTGTCTTGGGAGGCGTTGATTTGTGTCGGATCGTCCAAGAAGAGAGCGAGGAAGGCATCCTCTTCAGATGATGAAGGAGGGCCAAGAACACTGGGAGGGGATGGCCACAGAGCGGAGGAGGCTAGCAAAGACAAAGAAG	1	2 Base Changes	VKRDTLSSTESTASGMQDEVRAVGEEQRSEEPKRRVDTSVSWEALICVGSSKKRARKASSSDDEGGPRTLGGDGHRAEEASKDKE	VKSATLSSTESTASGMQDEVRAVGEEQRSEEPKRRVDTSVSWEALICVGSSKKRARKASSSDDEGGPRTLGGDGHRAEEASKDKE
GTCAAGAGAGCAACCTTGACCTACACGGAGAGCACGGCGTATGGAATGCAGGATGAGGTCAGAGCGGTTGGCGATGAGCAAAGGTCAGAGGAGCCAAAGCGCAGGGTGGATACTTCAGTGTCTTGGGAGGCGTTGATTTGTGTCGGATCGTCCAAGAAGAGAGCGAGGAAGGCATCCTCTTCAGATGATGAAGGAGGGCCAAGAACACTGGGAGGGGATGGCCACAGAGCGGAGGAGGCTAGCAAAGACAAAGAAG	GTCAAGAGAGCAACCTTGACCTACACGGAGAGCACGGCGTATGGAATGCAGGATGAGGTCAGAGCGGTTGGCGATGAGCAAAGGTCAGAGGAGCCAAAGCGCAGGGTGGATACTTCAGTGTCTTGGGAGGCGTTGATTTGTGTCGGATCGTCCAAGAAGAGAGCGAGGAAGGCATCCTCTTCAGATGATGAAGGAGGGCCAAGAACACTGGGAGGGGATGGCCACAGAGCGGAGGAGGCTAGCAAAGACAAAGAAG	1	6 Base Changes	VKRATLTYTESTAYGMQDEVRAVGDEQRSEEPKRRVDTSVSWEALICVGSSKKRARKASSSDDEGGPRTLGGDGHRAEEASKDKE	VKSATLSSTESTASGMQDEVRAVGEEQRSEEPKRRVDTSVSWEALICVGSSKKRARKASSSDDEGGPRTLGGDGHRAEEASKDKE
GTCAAGAGAGCAACCTTGTCCTCCACGGAGAGCACGGCGTCTGGCATGCAGGATGAGGTCAGAGCGGTTGGCGAGGATCAAAGGTCAGATGAGCCAAAGCGCAGGGTGGATACTTCAGTGTCTTGGGAGGCGTTGATTTGTGTCGGATCGTCCAAGAAGAGAGCGAGGAAGGCATCCTCTTCAGATGGTGAAGGAGGGCCCAGAACACTGGGAGGGGATGGCCACAGAGCGGAGGAGGCTAGCAAAGACATAGAAG	GTCAAGAGAGCAACCTTGTCCTCCACGGAGAGCACGGCGTCTGGCATGCAGGATGAGGTCAGAGCGGTTGGCGAGGATCAAAGGTCAGATGAGCCAAAGCGCAGGGTGGATACTTCAGTGTCTTGGGAGGCGTTGATTTGTGTCGGATCGTCCAAGAAGAGAGCGAGGAAGGCATCCTCTTCAGATGGTGAAGGAGGGCCCAGAACACTGGGAGGGGATGGCCACAGAGCGGAGGAGGCTAGCAAAGACATAGAAG	1	8 Base Changes	VKRATLSSTESTASGMQDEVRAVGEDQRSDEPKRRVDTSVSWEALICVGSSKKRARKASSSDGEGGPRTLGGDGHRAEEASKDIE	VKSATLSSTESTASGMQDEVRAVGEEQRSEEPKRRVDTSVSWEALICVGSSKKRARKASSSDDEGGPRTLGGDGHRAEEASKDKE
GTCAAGAGAGCCAACTTGTCCTCAACGGAGAGCACGGCGTCTGGAATGCAGGATGAGGTCAGAGCGGTTGGCGAGGAGCAAAGGTCAGAGGAGCCAAAGCGCAGGGTGGATACTTCAGTGTCTTGGGAGGCGTTGATTTGTGTCGGATCGTCCAAGAAGAGAGCGAGGAAGGCATCCTCTTCAGATGATGAAGGAGGGCCAAGAACACTGGGAGGGGATGGCCACAGAGCGGAGGAGGCTAGCAAAGACAAAGAAG	GTCAAGAGAGCCAACTTGTCCTCAACGGAGAGCACGGCGTCTGGAATGCAGGATGAGGTCAGAGCGGTTGGCGAGGAGCAAAGGTCAGAGGAGCCAAAGCGCAGGGTGGATACTTCAGTGTCTTGGGAGGCGTTGATTTGTGTCGGATCGTCCAAGAAGAGAGCGAGGAAGGCATCCTCTTCAGATGATGAAGGAGGGCCAAGAACACTGGGAGGGGATGGCCACAGAGCGGAGGAGGCTAGCAAAGACAAAGAAG	1	3 Base Changes	VKRANLSSTESTASGMQDEVRAVGEEQRSEEPKRRVDTSVSWEALICVGSSKKRARKASSSDDEGGPRTLGGDGHRAEEASKDKE	VKSATLSSTESTASGMQDEVRAVGEEQRSEEPKRRVDTSVSWEALICVGSSKKRARKASSSDDEGGPRTLGGDGHRAEEASKDKE
GTCAAGAGAGCCAACTTGTCCTCCACGGAGAGCACGGCGTCTTGAATGCAGGATGAGGTCAGAGCGGTTGGCGAGGAGCAAAGGTGAGATGAGCCAAAGCGCAGGGTGGATACTTCAGTGTCTTGGGAGGCGTTGATTTGTGTCGGATCGTCCAAGAAGAGAGCGAGGAAGGCATCCTCTTCAGATGATGAAGGAGGGCCAAGAACACTGGGAGGGGATGGCCACAGAGCGGAGGAGGCTAGCAAAGACAAAGAAG	GTCAAGAGAGCCAACTTGTCCTCCACGGAGAGCACGGCGTCTTGAATGCAGGATGAGGTCAGAGCGGTTGGCGAGGAGCAAAGGTGAGATGAGCCAAAGCGCAGGGTGGATACTTCAGTGTCTTGGGAGGCGTTGATTTGTGTCGGATCGTCCAAGAAGAGAGCGAGGAAGGCATCCTCTTCAGATGATGAAGGAGGGCCAAGAACACTGGGAGGGGATGGCCACAGAGCGGAGGAGGCTAGCAAAGACAAAGAAG	1	5 Base Changes	VKRANLSSTESTAS*	VKSATLSSTESTASGMQDEVRAVGEEQRSEEPKRRVDTSVSWEALICVGSSKKRARKASSSDDEGGPRTLGGDGHRAEEASKDKE
GTCAAGAGAGCCAACTTGTCCTCCACGGAGATCACGGCGTCTTGAATGCAGGATGAGGTCAGAGCGGTTGGCGAGGAGCAAAGGTCAGAGGAGCCAAAGCGCAGGGTGGATACTTCAGTGTCTTGGGAGGCGTTGATTTGTGTCGGATCGTCCAAGAAGAGAGCGAGGAAGGCATCCTCTTCAGATGATGAAGGAGGGCCAAGAACACTGGGAGGGGATGGCCACAGAGCGGAGGAGGCTAGCAAAGACAAAGAAG	GTCAAGAGAGCCAACTTGTCCTCCACGGAGATCACGGCGTCTTGAATGCAGGATGAGGTCAGAGCGGTTGGCGAGGAGCAAAGGTCAGAGGAGCCAAAGCGCAGGGTGGATACTTCAGTGTCTTGGGAGGCGTTGATTTGTGTCGGATCGTCCAAGAAGAGAGCGAGGAAGGCATCCTCTTCAGATGATGAAGGAGGGCCAAGAACACTGGGAGGGGATGGCCACAGAGCGGAGGAGGCTAGCAAAGACAAAGAAG	1	4 Base Changes	VKRANLSSTEITAS*	VKSATLSSTESTASGMQDEVRAVGEEQRSEEPKRRVDTSVSWEALICVGSSKKRARKASSSDDEGGPRTLGGDGHRAEEASKDKE
GTCAAGAGAGCCACATTCTCCACCACGGAGAGCACGGCGTCTGGAATGCAGGATGAGGTCAGAGCGGTTGGCGAGGAGCAAAGGTCAGAGGAGCCAAAGCGCAGGGTGGATACATCAGTGTCTTGGGAGGCGTTGATTTGTGTCGGATCGACCAAGAAGAGAGCGAGGAAGGCATCCTCTTCAGATGATGAAGGAGGGCCCAGAACACTGGCAGGGGATGGCCACAGAGCGGAGGAGGCTAGCAAAGACAAAGAAG	GTCAAGAGAGCCACATTCTCCACCACGGAGAGCACGGCGTCTGGAATGCAGGATGAGGTCAGAGCGGTTGGCGAGGAGCAAAGGTCAGAGGAGCCAAAGCGCAGGGTGGATACATCAGTGTCTTGGGAGGCGTTGATTTGTGTCGGATCGACCAAGAAGAGAGCGAGGAAGGCATCCTCTTCAGATGATGAAGGAGGGCCCAGAACACTGGCAGGGGATGGCCACAGAGCGGAGGAGGCTAGCAAAGACAAAGAAG	1	8 Base Changes	VKRATFSTTESTASGMQDEVRAVGEEQRSEEPKRRVDTSVSWEALICVGSTKKRARKASSSDDEGGPRTLAGDGHRAEEASKDKE	VKSATLSSTESTASGMQDEVRAVGEEQRSEEPKRRVDTSVSWEALICVGSSKKRARKASSSDDEGGPRTLGGDGHRAEEASKDKE
GTCAAGAGAGCCACCATGTCCTCCACGGAGAGCACGGCGTCTGGAATGCAGGATGAGGTCAGAGCGGTTGGCGAGGAGCAAAGGTCAGAGGAGCCAAAGCGCAGGGTGGATACTTCAGTGTCTTGGGAGGCGTTGATTTGTGTCGGATCGTCCAAGAAGAGAGCGAGGAAGGCATCCTCTTCAGATGATGAAGGAGGGCCAAGAACACTGGGAGGGGATGGCCACAGAGCGGAGGAGGCTAGCAAAGACAAAGAAG	GTCAAGAGAGCCACCATGTCCTCCACGGAGAGCACGGCGTCTGGAATGCAGGATGAGGTCAGAGCGGTTGGCGAGGAGCAAAGGTCAGAGGAGCCAAAGCGCAGGGTGGATACTTCAGTGTCTTGGGAGGCGTTGATTTGTGTCGGATCGTCCAAGAAGAGAGCGAGGAAGGCATCCTCTTCAGATGATGAAGGAGGGCCAAGAACACTGGGAGGGGATGGCCACAGAGCGGAGGAGGCTAGCAAAGACAAAGAAG	1	2 Base Changes	VKRATMSSTESTASGMQDEVRAVGEEQRSEEPKRRVDTSVSWEALICVGSSKKRARKASSSDDEGGPRTLGGDGHRAEEASKDKE	VKSATLSSTESTASGMQDEVRAVGEEQRSEEPKRRVDTSVSWEALICVGSSKKRARKASSSDDEGGPRTLGGDGHRAEEASKDKE
GTCAAGAGAGCCACCATGTCCTCCACGGAGAGCACGGCGTCTGGAATGCAGGATGAGGTCAGAGCGGTTGGCGAGGAGCAAAGGTCAGAGGAGCCAAAGCGCAGGGTGGATACTTCAGTGTCTTGGGAGGCGTTGATTTGTGTCGGATCGTCCAATAAGAGAGCGAGGAAGGCATCCTCTTCAGATGATGAGGGAGGGCCAAGAACACTGGGAGGGGATGGCCACAGAGCGGAGGAGGCTAGCAAAGACAAAGAAG	GTCAAGAGAGCCACCATGTCCTCCACGGAGAGCACGGCGTCTGGAATGCAGGATGAGGTCAGAGCGGTTGGCGAGGAGCAAAGGTCAGAGGAGCCAAAGCGCAGGGTGGATACTTCAGTGTCTTGGGAGGCGTTGATTTGTGTCGGATCGTCCAATAAGAGAGCGAGGAAGGCATCCTCTTCAGATGATGAGGGAGGGCCAAGAACACTGGGAGGGGATGGCCACAGAGCGGAGGAGGCTAGCAAAGACAAAGAAG	1	4 Base Changes	VKRATMSSTESTASGMQDEVRAVGEEQRSEEPKRRVDTSVSWEALICVGSSNKRARKASSSDDEGGPRTLGGDGHRAEEASKDKE	VKSATLSSTESTASGMQDEVRAVGEEQRSEEPKRRVDTSVSWEALICVGSSKKRARKASSSDDEGGPRTLGGDGHRAEEASKDKE
GTCAAGAGAGCCACCCTGTCCTCCACGGAGAGCACGGCGTCTGGAATGCAGGATGAGGTCAGAGCGGTTGGCGAGGAGCAAAGGTCAGAGGAGCCAAAGAGCAGGGTGGATACTTCAGTGTCTTGGGAGGCGTTGACTTGTGTCGGATCGTCCAAGAAGAGAGCGAGGAAGGCATCCTCTTCAGATGATGAAGGAGGGCCAAGAACACTGGGAGGGGATGGCCACAGAGCGGAGGAGGCTAGCAAAGACAAAGAAG	GTCAAGAGAGCCACCCTGTCCTCCACGGAGAGCACGGCGTCTGGAATGCAGGATGAGGTCAGAGCGGTTGGCGAGGAGCAAAGGTCAGAGGAGCCAAAGAGCAGGGTGGATACTTCAGTGTCTTGGGAGGCGTTGACTTGTGTCGGATCGTCCAAGAAGAGAGCGAGGAAGGCATCCTCTTCAGATGATGAAGGAGGGCCAAGAACACTGGGAGGGGATGGCCACAGAGCGGAGGAGGCTAGCAAAGACAAAGAAG	1	4 Base Changes	VKRATLSSTESTASGMQDEVRAVGEEQRSEEPKSRVDTSVSWEALTCVGSSKKRARKASSSDDEGGPRTLGGDGHRAEEASKDKE	VKSATLSSTESTASGMQDEVRAVGEEQRSEEPKRRVDTSVSWEALICVGSSKKRARKASSSDDEGGPRTLGGDGHRAEEASKDKE
GTCAAGAGAGCCACCTAGTCCTCCACGGAGAGCACGGCGTCTGGAATGCAGGATGAGGTCAGAGCGGTTGGCGAGGAGCAAAGGTCAGAGGAGCCAAAGCGCAGGGTGGATACTTCAGTGTCTTGGGAGGCGTTGATTTGTGTCGGATCGTCCAAGAAGAGAGCGAGGAAGGCATCCTCTTCAGATGATGAAGGAGGGCCAAGAACACTGGGAGGGGATGGCCACAGAGCGGAGGAGGCTAGCAAAGACAAAGAAG	GTCAAGAGAGCCACCTAGTCCTCCACGGAGAGCACGGCGTCTGGAATGCAGGATGAGGTCAGAGCGGTTGGCGAGGAGCAAAGGTCAGAGGAGCCAAAGCGCAGGGTGGATACTTCAGTGTCTTGGGAGGCGTTGATTTGTGTCGGATCGTCCAAGAAGAGAGCGAGGAAGGCATCCTCTTCAGATGATGAAGGAGGGCCAAGAACACTGGGAGGGGATGGCCACAGAGCGGAGGAGGCTAGCAAAGACAAAGAAG	1	2 Base Changes	VKRAT*	VKSATLSSTESTASGMQDEVRAVGEEQRSEEPKRRVDTSVSWEALICVGSSKKRARKASSSDDEGGPRTLGGDGHRAEEASKDKE
GTCAAGAGAGCCACCTATTCCTCCACGGAGAGCACGGCGTCTGGAATGCAGGATGAGGTCAGAGCGGTTAGCGAGGAGCAAAGGTCAGAGGAGCCAAAGCGCAGGGTGGATACTTCAGTGTCTTGGGAGGCGTTGATTTGTGTCGGATCGTCCAAGAAGAGAGCGAGGAAGGCATCCTCTTCAGATGATGAAGGAGGGCCAAGAACACTGGGAGGGGATGGCCACAGAGCGGAGGAGGCTAGCAAAGACAAAGAAG	GTCAAGAGAGCCACCTATTCCTCCACGGAGAGCACGGCGTCTGGAATGCAGGATGAGGTCAGAGCGGTTAGCGAGGAGCAAAGGTCAGAGGAGCCAAAGCGCAGGGTGGATACTTCAGTGTCTTGGGAGGCGTTGATTTGTGTCGGATCGTCCAAGAAGAGAGCGAGGAAGGCATCCTCTTCAGATGATGAAGGAGGGCCAAGAACACTGGGAGGGGATGGCCACAGAGCGGAGGAGGCTAGCAAAGACAAAGAAG	1	4 Base Changes	VKRATYSSTESTASGMQDEVRAVSEEQRSEEPKRRVDTSVSWEALICVGSSKKRARKASSSDDEGGPRTLGGDGHRAEEASKDKE	VKSATLSSTESTASGMQDEVRAVGEEQRSEEPKRRVDTSVSWEALICVGSSKKRARKASSSDDEGGPRTLGGDGHRAEEASKDKE
GTCAAGAGAGCCACCTTCTCCTCCACGGAGAGCACGGCGTCTGGAATGCAGGATGAGGTCAGAGCGGTTGGCGATGAGAAAAGGTCAGAGGAGCCAAAGCGCAGGGTGGATACTTCAGTGTCTTGGGAGGCGTTGATTTGTGTCGGATCGTCCAAGAAGAGAGCGAGGAAGGCATCCTCTTCAGATGATGAAGGAGGGCCAAGAACACTGGGAGGGGATGGCCACAGAGCGGAGGAGGCTAGCAAAGACAAAGAAG	GTCAAGAGAGCCACCTTCTCCTCCACGGAGAGCACGGCGTCTGGAATGCAGGATGAGGTCAGAGCGGTTGGCGATGAGAAAAGGTCAGAGGAGCCAAAGCGCAGGGTGGATACTTCAGTGTCTTGGGAGGCGTTGATTTGTGTCGGATCGTCCAAGAAGAGAGCGAGGAAGGCATCCTCTTCAGATGATGAAGGAGGGCCAAGAACACTGGGAGGGGATGGCCACAGAGCGGAGGAGGCTAGCAAAGACAAAGAAG	1	4 Base Changes	VKRATFSSTESTASGMQDEVRAVGDEKRSEEPKRRVDTSVSWEALICVGSSKKRARKASSSDDEGGPRTLGGDGHRAEEASKDKE	VKSATLSSTESTASGMQDEVRAVGEEQRSEEPKRRVDTSVSWEALICVGSSKKRARKASSSDDEGGPRTLGGDGHRAEEASKDKE
GTCAAGAGAGCCACCTTGCCCTCCACGGAGAGCACGGCGTCTGGAATGCAGGTTGAGGTCAGAGCGGTTGGCGCGGAGCGAAGGTCCGAGGAGCCCGAGAGCAGGGGGGATACTTCAGTGTCGGGGGAGGCGTTGATTTGGGTCGGATCGTCCAAGAAGAGAGCGAGGAAGGCATCCTCTTCAGATGATGAAGGAGGGCCAAGAACACTGGGAGGGGATGGCCACAGAGCGGAGGAGGCTAGCAAAGACAAAGAAG	GTCAAGAGAGCCACCTTGCCCTCCACGGAGAGCACGGCGTCTGGAATGCAGGTTGAGGTCAGAGCGGTTGGCGCGGAGCGAAGGTCCGAGGAGCCCGAGAGCAGGGGGGATACTTCAGTGTCGGGGGAGGCGTTGATTTGGGTCGGATCGTCCAAGAAGAGAGCGAGGAAGGCATCCTCTTCAGATGATGAAGGAGGGCCAAGAACACTGGGAGGGGATGGCCACAGAGCGGAGGAGGCTAGCAAAGACAAAGAAG	1	13 Base Changes	VKRATLPSTESTASGMQVEVRAVGAERRSEEPESRGDTSVSGEALIWVGSSKKRARKASSSDDEGGPRTLGGDGHRAEEASKDKE	VKSATLSSTESTASGMQDEVRAVGEEQRSEEPKRRVDTSVSWEALICVGSSKKRARKASSSDDEGGPRTLGGDGHRAEEASKDKE
GTCAAGAGAGCCACCTTGTACTCCACGGAGAGCACGGCGTCTGGAATGCAGGATGAGGTCAGAGCGGTTGGCGAGGAGCAAAGGTCAGAGGAGCCAAAGCGCAGGGTGGATACTTCAGTGTCTTGGGAGGCGTTGATTTGTGTCGGATCGTCCAAGAAGAGAGCGAGGAAGGCATCCTCTTCAGATGATGAAGGAGGGCCAAGAACACTGGGAGGGGATGGCCACAGAGCGGAGGAGGCTAGCAAAGACAAAGAAG	GTCAAGAGAGCCACCTTGTACTCCACGGAGAGCACGGCGTCTGGAATGCAGGATGAGGTCAGAGCGGTTGGCGAGGAGCAAAGGTCAGAGGAGCCAAAGCGCAGGGTGGATACTTCAGTGTCTTGGGAGGCGTTGATTTGTGTCGGATCGTCCAAGAAGAGAGCGAGGAAGGCATCCTCTTCAGATGATGAAGGAGGGCCAAGAACACTGGGAGGGGATGGCCACAGAGCGGAGGAGGCTAGCAAAGACAAAGAAG	1	2 Base Changes	VKRATLYSTESTASGMQDEVRAVGEEQRSEEPKRRVDTSVSWEALICVGSSKKRARKASSSDDEGGPRTLGGDGHRAEEASKDKE	VKSATLSSTESTASGMQDEVRAVGEEQRSEEPKRRVDTSVSWEALICVGSSKKRARKASSSDDEGGPRTLGGDGHRAEEASKDKE
GTCAAGAGAGCCACCTTGTACTCCACGGAGAGCACGGCGTCTGGAATGCAGGATGAGGTCAGAGCGGTTGGCGAGGAGCAAAGGTCAGAGGAGCCAAAGCTCAGGGTGGATAATTCAGTGTCTTGGGAGGCGTTGATTTGTGTCGGATCGTCCAAGAAGAGAGCGAGGAAGGCATCCTCTTCAGATGATGAAGGAGGGCCAAGAACACTGTGAGGGGATGGCCACAGAGAGGAGGATGCTAGCAAAGACAAAGAAG	GTCAAGAGAGCCACCTTGTACTCCACGGAGAGCACGGCGTCTGGAATGCAGGATGAGGTCAGAGCGGTTGGCGAGGAGCAAAGGTCAGAGGAGCCAAAGCTCAGGGTGGATAATTCAGTGTCTTGGGAGGCGTTGATTTGTGTCGGATCGTCCAAGAAGAGAGCGAGGAAGGCATCCTCTTCAGATGATGAAGGAGGGCCAAGAACACTGTGAGGGGATGGCCACAGAGAGGAGGATGCTAGCAAAGACAAAGAAG	1	7 Base Changes	VKRATLYSTESTASGMQDEVRAVGEEQRSEEPKLRVDNSVSWEALICVGSSKKRARKASSSDDEGGPRTL*	VKSATLSSTESTASGMQDEVRAVGEEQRSEEPKRRVDTSVSWEALICVGSSKKRARKASSSDDEGGPRTLGGDGHRAEEASKDKE
GTCAAGAGAGCCACCTTGTCCTACACGGAGAGCACGGCGTCTGGAATGCAGGATGAGGTCAGAGCGGTTGGCGAGGAGCAAAGGTCAGAGGACCCAAAGCGCAGGGTGGATACTTCAGTGTCTTGGGAGGCGTTGATTTGTGTCGGATCGTCCAAGAAGAGAGCGAGGAAGTCATCCTCTTCAGATGATGAAGGAGGGCAAAGAACACTGGGAGGGGATGGCCACAGAGCGGAGGAGGATAGCAAAGACAAAGAAG	GTCAAGAGAGCCACCTTGTCCTACACGGAGAGCACGGCGTCTGGAATGCAGGATGAGGTCAGAGCGGTTGGCGAGGAGCAAAGGTCAGAGGACCCAAAGCGCAGGGTGGATACTTCAGTGTCTTGGGAGGCGTTGATTTGTGTCGGATCGTCCAAGAAGAGAGCGAGGAAGTCATCCTCTTCAGATGATGAAGGAGGGCAAAGAACACTGGGAGGGGATGGCCACAGAGCGGAGGAGGATAGCAAAGACAAAGAAG	1	6 Base Changes	VKRATLSYTESTASGMQDEVRAVGEEQRSEDPKRRVDTSVSWEALICVGSSKKRARKSSSSDDEGGQRTLGGDGHRAEEDSKDKE	VKSATLSSTESTASGMQDEVRAVGEEQRSEEPKRRVDTSVSWEALICVGSSKKRARKASSSDDEGGPRTLGGDGHRAEEASKDKE
GTCAAGAGAGCCACCTTGTCCTCCACGGAGAGCACGGAGTCTGGAATGCAGGATGAGGTCAGAGCGGTTGGCGAGGAGCAAAGGTCAGAGGAGCCAAAGCGCAGGGTGGATACTTCAGTGTCTTGGGAGGCGTTGATTTGTGTCGGATCGTCCAAGAAGAGAGCGAGGAAGGCATCCTCTTCAGATGATGAAGGAGGGCCAAGAACACTGGGAGGGGATGGCCACAGAGCGGAGGAGGCTAGCAAAGACAAAGAAG	GTCAAGAGAGCCACCTTGTCCTCCACGGAGAGCACGGAGTCTGGAATGCAGGATGAGGTCAGAGCGGTTGGCGAGGAGCAAAGGTCAGAGGAGCCAAAGCGCAGGGTGGATACTTCAGTGTCTTGGGAGGCGTTGATTTGTGTCGGATCGTCCAAGAAGAGAGCGAGGAAGGCATCCTCTTCAGATGATGAAGGAGGGCCAAGAACACTGGGAGGGGATGGCCACAGAGCGGAGGAGGCTAGCAAAGACAAAGAAG	1	2 Base Changes	VKRATLSSTESTESGMQDEVRAVGEEQRSEEPKRRVDTSVSWEALICVGSSKKRARKASSSDDEGGPRTLGGDGHRAEEASKDKE	VKSATLSSTESTASGMQDEVRAVGEEQRSEEPKRRVDTSVSWEALICVGSSKKRARKASSSDDEGGPRTLGGDGHRAEEASKDKE
GTCAAGAGAGCCACCTTGTCCTCCACGGAGAGCACGGCGTCTGCAATGCAGGATGAGGTCAGAGCGGTTGGCGAGGAGCAAAGGTCCGAGGAGCCAAAGCTCAGGTTGGATACTTCAGTGTCTTGGGAGGCGTTGATTTGTGTCGGATCGTCCAAGAAGAGAGCGAGGAAGGCATCCTCTTCAGATGATGAAGGAGGGCCAAGAACACTGGGAGGGGATGGCCACAGAGCGGAGGATGCTAGCAAAGACAAAGAAG	GTCAAGAGAGCCACCTTGTCCTCCACGGAGAGCACGGCGTCTGCAATGCAGGATGAGGTCAGAGCGGTTGGCGAGGAGCAAAGGTCCGAGGAGCCAAAGCTCAGGTTGGATACTTCAGTGTCTTGGGAGGCGTTGATTTGTGTCGGATCGTCCAAGAAGAGAGCGAGGAAGGCATCCTCTTCAGATGATGAAGGAGGGCCAAGAACACTGGGAGGGGATGGCCACAGAGCGGAGGATGCTAGCAAAGACAAAGAAG	1	6 Base Changes	VKRATLSSTESTASAMQDEVRAVGEEQRSEEPKLRLDTSVSWEALICVGSSKKRARKASSSDDEGGPRTLGGDGHRAEDASKDKE	VKSATLSSTESTASGMQDEVRAVGEEQRSEEPKRRVDTSVSWEALICVGSSKKRARKASSSDDEGGPRTLGGDGHRAEEASKDKE
GTCAAGAGAGCCACCTTGTCCTCCACGGAGAGCACGGCGTCTGGAACGCAGGATGAGGTCAGAGCGGTTGGCGAGGAGCAAAGGTCAGAGGAGCCAAAGCGCAGGGTGGATACTTCAGTGTCTTGGGAGGCGTAGATTTGTGTCGGATCGTCCAAGAAGAGAGCGAGGAAGGCATCCTCTTCAGATGATGAAGGAGGGCCAAGAACACTGGGAGGGGATGGCCACAGAGCGGAGGAGGCTAGCAAAGACAAAGAAG	GTCAAGAGAGCCACCTTGTCCTCCACGGAGAGCACGGCGTCTGGAACGCAGGATGAGGTCAGAGCGGTTGGCGAGGAGCAAAGGTCAGAGGAGCCAAAGCGCAGGGTGGATACTTCAGTGTCTTGGGAGGCGTAGATTTGTGTCGGATCGTCCAAGAAGAGAGCGAGGAAGGCATCCTCTTCAGATGATGAAGGAGGGCCAAGAACACTGGGAGGGGATGGCCACAGAGCGGAGGAGGCTAGCAAAGACAAAGAAG	1	3 Base Changes	VKRATLSSTESTASGTQDEVRAVGEEQRSEEPKRRVDTSVSWEA*	VKSATLSSTESTASGMQDEVRAVGEEQRSEEPKRRVDTSVSWEALICVGSSKKRARKASSSDDEGGPRTLGGDGHRAEEASKDKE
GTCAAGAGAGCCACCTTGTCCTCCACGGAGAGCACGGCGTCTGGAATGCAGGATGAGGTCAGAGCGCTTGGCGAGGAGCAAAGGTCAGAGGAGCCAAAGCGCAGGGTGGATACTTCAGTGTCTTGGGAGGCGTTGATTTGTGTCGGATCGTCCAAGAAGAGAGCGAGGAAGGCATCCTCTTCAGATGATGAAGGAGGGCCAAGAACACTGGGAGGGGATGGCCACAGAGCGGAGGAGGCTAGCAAAGACAAAGAAG	GTCAAGAGAGCCACCTTGTCCTCCACGGAGAGCACGGCGTCTGGAATGCAGGATGAGGTCAGAGCGCTTGGCGAGGAGCAAAGGTCAGAGGAGCCAAAGCGCAGGGTGGATACTTCAGTGTCTTGGGAGGCGTTGATTTGTGTCGGATCGTCCAAGAAGAGAGCGAGGAAGGCATCCTCTTCAGATGATGAAGGAGGGCCAAGAACACTGGGAGGGGATGGCCACAGAGCGGAGGAGGCTAGCAAAGACAAAGAAG	1	2 Base Changes	VKRATLSSTESTASGMQDEVRALGEEQRSEEPKRRVDTSVSWEALICVGSSKKRARKASSSDDEGGPRTLGGDGHRAEEASKDKE	VKSATLSSTESTASGMQDEVRAVGEEQRSEEPKRRVDTSVSWEALICVGSSKKRARKASSSDDEGGPRTLGGDGHRAEEASKDKE
GTCAAGAGAGCCACCTTGTCCTCCACGGAGAGCACGGCGTCTGGAATGCAGGATGAGGTCAGAGCGGGTGGCGAGGAGCAAAGGTCAGAGGAGCCAAAGCGCAGGGTGGATACTTCAGTGTCTTGGGAGGCGTTGATTTGTGTCGGATCGTCCAAGAAGAGAGCGAGGAAGGCATCCTCTTCAGATGATGAAGGAGGGCCAAGAACACTGGGAGGGGATGGCCACAGAGCGGAGGAGGCTAGCAAAGACAAAGAAG	GTCAAGAGAGCCACCTTGTCCTCCACGGAGAGCACGGCGTCTGGAATGCAGGATGAGGTCAGAGCGGGTGGCGAGGAGCAAAGGTCAGAGGAGCCAAAGCGCAGGGTGGATACTTCAGTGTCTTGGGAGGCGTTGATTTGTGTCGGATCGTCCAAGAAGAGAGCGAGGAAGGCATCCTCTTCAGATGATGAAGGAGGGCCAAGAACACTGGGAGGGGATGGCCACAGAGCGGAGGAGGCTAGCAAAGACAAAGAAG	1	2 Base Changes	VKRATLSSTESTASGMQDEVRAGGEEQRSEEPKRRVDTSVSWEALICVGSSKKRARKASSSDDEGGPRTLGGDGHRAEEASKDKE	VKSATLSSTESTASGMQDEVRAVGEEQRSEEPKRRVDTSVSWEALICVGSSKKRARKASSSDDEGGPRTLGGDGHRAEEASKDKE
GTCAAGAGAGCCACCTTGTCCTCCACGGAGAGCACGGCGTCTGGAATGCAGGATGAGGTCAGAGCGGTGGGCGAGGAGCAAAGGTCAGAGGAGCCACAGCGCAGGGTGGAAACTTCAGTGTCTTGGGAGGCGTTGATTTGTGTCGGATCGTCCAAGAAGAGAGCGAGGAAGGCATCCTCTTCAGATGATGAAGGAGGGCCAAGAACACTGGGAGGGGATGGCCACAGAGCGGAGGAGGCGAGCAAAGACAAAGAAG	GTCAAGAGAGCCACCTTGTCCTCCACGGAGAGCACGGCGTCTGGAATGCAGGATGAGGTCAGAGCGGTGGGCGAGGAGCAAAGGTCAGAGGAGCCACAGCGCAGGGTGGAAACTTCAGTGTCTTGGGAGGCGTTGATTTGTGTCGGATCGTCCAAGAAGAGAGCGAGGAAGGCATCCTCTTCAGATGATGAAGGAGGGCCAAGAACACTGGGAGGGGATGGCCACAGAGCGGAGGAGGCGAGCAAAGACAAAGAAG	1	5 Base Changes	VKRATLSSTESTASGMQDEVRAVGEEQRSEEPQRRVETSVSWEALICVGSSKKRARKASSSDDEGGPRTLGGDGHRAEEASKDKE	VKSATLSSTESTASGMQDEVRAVGEEQRSEEPKRRVDTSVSWEALICVGSSKKRARKASSSDDEGGPRTLGGDGHRAEEASKDKE
GTCAAGAGAGCCACCTTGTCCTCCACGGAGAGCACGGCGTCTGGAATGCAGGATGAGGTCAGAGCGGTTGGCGAGGAGCAAAGGTCAAAGGAGCCAAAGCGCAGGGTGGATACTTCAGTGTCTTGGGAGGCGTTGATTTGTGTCGGATCGTCCAAGAAGAGAGCGAGGAAGGCATCCTCTTCAGATGATGAAGGAGGGCCAAGAACACTGGGAGGGGATGGCCACAGAGCGGAGGAGGCTAGCAAAGACAAAGAAG	GTCAAGAGAGCCACCTTGTCCTCCACGGAGAGCACGGCGTCTGGAATGCAGGATGAGGTCAGAGCGGTTGGCGAGGAGCAAAGGTCAAAGGAGCCAAAGCGCAGGGTGGATACTTCAGTGTCTTGGGAGGCGTTGATTTGTGTCGGATCGTCCAAGAAGAGAGCGAGGAAGGCATCCTCTTCAGATGATGAAGGAGGGCCAAGAACACTGGGAGGGGATGGCCACAGAGCGGAGGAGGCTAGCAAAGACAAAGAAG	1	2 Base Changes	VKRATLSSTESTASGMQDEVRAVGEEQRSKEPKRRVDTSVSWEALICVGSSKKRARKASSSDDEGGPRTLGGDGHRAEEASKDKE	VKSATLSSTESTASGMQDEVRAVGEEQRSEEPKRRVDTSVSWEALICVGSSKKRARKASSSDDEGGPRTLGGDGHRAEEASKDKE
GTCAAGAGAGCCACCTTGTCCTCCACGGAGAGCACGGCGTCTGGAATGCAGGATGAGGTCAGAGCGGTTGGCGAGGAGCAAAGGTCACAGGAGCCAAAGCGCAGGGTGGATACTTCAGTGTCTTGGGAGGCGTTGATTTGTGTCGGATCGTCAAAGAAGAGAGCGAGGAAGGCATCCTCTTGAGATGATGAAGGAGGGCCAAGAACACTGGGAGGGGATGGCCACGGTGCGTAGGATGCTAGAAAAGTCAAAGAAG	GTCAAGAGAGCCACCTTGTCCTCCACGGAGAGCACGGCGTCTGGAATGCAGGATGAGGTCAGAGCGGTTGGCGAGGAGCAAAGGTCACAGGAGCCAAAGCGCAGGGTGGATACTTCAGTGTCTTGGGAGGCGTTGATTTGTGTCGGATCGTCAAAGAAGAGAGCGAGGAAGGCATCCTCTTGAGATGATGAAGGAGGGCCAAGAACACTGGGAGGGGATGGCCACGGTGCGTAGGATGCTAGAAAAGTCAAAGAAG	1	10 Base Changes	VKRATLSSTESTASGMQDEVRAVGEEQRSQEPKRRVDTSVSWEALICVGSSKKRARKASS*	VKSATLSSTESTASGMQDEVRAVGEEQRSEEPKRRVDTSVSWEALICVGSSKKRARKASSSDDEGGPRTLGGDGHRAEEASKDKE
GTCAAGAGAGCCACCTTGTCCTCCACGGAGAGCACGGCGTCTGGAATGCAGGATGAGGTCAGAGCGGTTGGCGAGGAGCAAAGGTCAGAGGAGCCAAAGCGCAGGGTGGATACTTAAGTGTCTTGGGAGGCGTTGATTTGTGTCGGATCGTCCAAGAAGAGAGCGAGGAAGGCATCCTCTTCAGATGATGAAGGAGGGCCAAGAACACTGGGAGGGGATGGCCACAGAGCGGAGGAGGCTAGCAAAGACAAAGAAG	GTCAAGAGAGCCACCTTGTCCTCCACGGAGAGCACGGCGTCTGGAATGCAGGATGAGGTCAGAGCGGTTGGCGAGGAGCAAAGGTCAGAGGAGCCAAAGCGCAGGGTGGATACTTAAGTGTCTTGGGAGGCGTTGATTTGTGTCGGATCGTCCAAGAAGAGAGCGAGGAAGGCATCCTCTTCAGATGATGAAGGAGGGCCAAGAACACTGGGAGGGGATGGCCACAGAGCGGAGGAGGCTAGCAAAGACAAAGAAG	1	2 Base Changes	VKRATLSSTESTASGMQDEVRAVGEEQRSEEPKRRVDT*	VKSATLSSTESTASGMQDEVRAVGEEQRSEEPKRRVDTSVSWEALICVGSSKKRARKASSSDDEGGPRTLGGDGHRAEEASKDKE
GTCAAGAGAGCCACCTTGTCCTCCACGGAGAGCACGGCGTCTGGAATGCAGGATGAGGTCAGAGCGGTTGGCGAGGAGCAAAGGTCAGAGGAGCCAAAGCGCAGGGTGGATACTTCAGTGTCTTGGGAGGCGTTGATATGTGTCGGATCGTCCAAGAAGAGAGCGAGGAAGGCATCCTCTTCAGATGATGAAGGAGGGCCAAGAACACTGGGAGGGGATGGCCACAGAGCGGAGGAGGCTAGCAAAGACAAAGAAG	GTCAAGAGAGCCACCTTGTCCTCCACGGAGAGCACGGCGTCTGGAATGCAGGATGAGGTCAGAGCGGTTGGCGAGGAGCAAAGGTCAGAGGAGCCAAAGCGCAGGGTGGATACTTCAGTGTCTTGGGAGGCGTTGATATGTGTCGGATCGTCCAAGAAGAGAGCGAGGAAGGCATCCTCTTCAGATGATGAAGGAGGGCCAAGAACACTGGGAGGGGATGGCCACAGAGCGGAGGAGGCTAGCAAAGACAAAGAAG	1	2 Base Changes	VKRATLSSTESTASGMQDEVRAVGEEQRSEEPKRRVDTSVSWEALICVGSSKKRARKASSSDDEGGPRTLGGDGHRAEEASKDKE	VKSATLSSTESTASGMQDEVRAVGEEQRSEEPKRRVDTSVSWEALICVGSSKKRARKASSSDDEGGPRTLGGDGHRAEEASKDKE
GTCAAGAGAGCCACCTTGTCCTCCACGGAGAGCACGGCGTCTGGAATGCAGGATGAGGTCAGAGCGGTTGGCGAGGAGCAAAGGTCAGAGGAGCCAAAGCGCAGGGTGGATACTTCAGTGTCTTGGGAGGCGTTGATTTGTGTCGGATAGTCAAAGAAGAGAGCTAGGAAGGCATACTCTTCAGATGATGAAGGAGGGCCAAGAACACTGGGAGGTGATGGCCACAGAGCGGAGGAGGCTAGCAAAGACAAAGAAG	GTCAAGAGAGCCACCTTGTCCTCCACGGAGAGCACGGCGTCTGGAATGCAGGATGAGGTCAGAGCGGTTGGCGAGGAGCAAAGGTCAGAGGAGCCAAAGCGCAGGGTGGATACTTCAGTGTCTTGGGAGGCGTTGATTTGTGTCGGATAGTCAAAGAAGAGAGCTAGGAAGGCATACTCTTCAGATGATGAAGGAGGGCCAAGAACACTGGGAGGTGATGGCCACAGAGCGGAGGAGGCTAGCAAAGACAAAGAAG	1	6 Base Changes	VKRATLSSTESTASGMQDEVRAVGEEQRSEEPKRRVDTSVSWEALICVG*	VKSATLSSTESTASGMQDEVRAVGEEQRSEEPKRRVDTSVSWEALICVGSSKKRARKASSSDDEGGPRTLGGDGHRAEEASKDKE
GTCAAGAGAGCCACCTTGTCCTCCACGGAGAGCACGGCGTCTGGAATGCAGGATGAGGTCAGAGCGGTTGGCGAGGAGCAAAGGTCAGAGGAGCCAAAGCGCAGGGTGGATACTTCAGTGTCTTGGGAGGCGTTGATTTGTGTCGGATCGTCAAAGAAGAGAGCGAGGAAGGCATCCTCTTCAGATGATGAAGGAGGGCCAAGAACACTGGGAGGGGATGGCCACAGAGCGGAGGAGGCTAGCAAAGACAAAGAAG	GTCAAGAGAGCCACCTTGTCCTCCACGGAGAGCACGGCGTCTGGAATGCAGGATGAGGTCAGAGCGGTTGGCGAGGAGCAAAGGTCAGAGGAGCCAAAGCGCAGGGTGGATACTTCAGTGTCTTGGGAGGCGTTGATTTGTGTCGGATCGTCAAAGAAGAGAGCGAGGAAGGCATCCTCTTCAGATGATGAAGGAGGGCCAAGAACACTGGGAGGGGATGGCCACAGAGCGGAGGAGGCTAGCAAAGACAAAGAAG	1	2 Base Changes	VKRATLSSTESTASGMQDEVRAVGEEQRSEEPKRRVDTSVSWEALICVGSSKKRARKASSSDDEGGPRTLGGDGHRAEEASKDKE	VKSATLSSTESTASGMQDEVRAVGEEQRSEEPKRRVDTSVSWEALICVGSSKKRARKASSSDDEGGPRTLGGDGHRAEEASKDKE
GTCAAGAGAGCCACCTTGTCCTCCACGGAGAGCACGGCGTCTGGAATGCAGGATGAGGTCAGAGCGGTTGGCGAGGAGCAAAGGTCAGAGGAGCCAAAGCGCAGGGTGGATACTTCAGTGTCTTGGGAGGCGTTGATTTGTGTCGGATCGTCCAAGAAGACAGCGAGGAAGGCATCCTCTTCAGATGATGAAGGAGGGCCAAGAACACTGGGAGGGGATGGCCACAGAGCGGAGGAGGCTAGCAAAGACAAAGAAG	GTCAAGAGAGCCACCTTGTCCTCCACGGAGAGCACGGCGTCTGGAATGCAGGATGAGGTCAGAGCGGTTGGCGAGGAGCAAAGGTCAGAGGAGCCAAAGCGCAGGGTGGATACTTCAGTGTCTTGGGAGGCGTTGATTTGTGTCGGATCGTCCAAGAAGACAGCGAGGAAGGCATCCTCTTCAGATGATGAAGGAGGGCCAAGAACACTGGGAGGGGATGGCCACAGAGCGGAGGAGGCTAGCAAAGACAAAGAAG	1	2 Base Changes	VKRATLSSTESTASGMQDEVRAVGEEQRSEEPKRRVDTSVSWEALICVGSSKKTARKASSSDDEGGPRTLGGDGHRAEEASKDKE	VKSATLSSTESTASGMQDEVRAVGEEQRSEEPKRRVDTSVSWEALICVGSSKKRARKASSSDDEGGPRTLGGDGHRAEEASKDKE
GTCAAGAGAGCCACCTTGTCCTCCACGGAGAGCACGGCGTCTGGAATGCAGGATGAGGTCAGAGCGGTTGGCGAGGAGCAAAGGTCAGAGGAGCCAAAGCGCAGGGTGGATACTTCAGTGTCTTGGGAGGCGTTGATTTGTGTCGGATCGTCCAAGAAGAGAGAGAGGAAGGCATCCTCTTCAGATGATGAAGGAGGGCCAAGAACACTGGGAGGGGATGGCCACAGAGCGGAGGAGGCTAGCAAAGACAAAGAAG	GTCAAGAGAGCCACCTTGTCCTCCACGGAGAGCACGGCGTCTGGAATGCAGGATGAGGTCAGAGCGGTTGGCGAGGAGCAAAGGTCAGAGGAGCCAAAGCGCAGGGTGGATACTTCAGTGTCTTGGGAGGCGTTGATTTGTGTCGGATCGTCCAAGAAGAGAGAGAGGAAGGCATCCTCTTCAGATGATGAAGGAGGGCCAAGAACACTGGGAGGGGATGGCCACAGAGCGGAGGAGGCTAGCAAAGACAAAGAAG	1	2 Base Changes	VKRATLSSTESTASGMQDEVRAVGEEQRSEEPKRRVDTSVSWEALICVGSSKKRERKASSSDDEGGPRTLGGDGHRAEEASKDKE	VKSATLSSTESTASGMQDEVRAVGEEQRSEEPKRRVDTSVSWEALICVGSSKKRARKASSSDDEGGPRTLGGDGHRAEEASKDKE
GTCAAGAGAGCCACCTTGTCCTCCACGGAGAGCACGGCGTCTGGAATGCAGGATGAGGTCAGAGCGGTTGGCGAGGAGCAAAGGTCAGAGGAGCCAAAGCGCAGGGTGGATACTTCAGTGTCTTGGGAGGCGTTGATTTGTGTCGGATCGTCCAAGAAGAGAGCGAGGAAGGCATCCTCCTCAGATGATGAAGGAGGGCCAAGAACACTGGGAGGGGATGGCCACAGAGCGGAGGAGGCTAGCAAAGACAAAGAAG	GTCAAGAGAGCCACCTTGTCCTCCACGGAGAGCACGGCGTCTGGAATGCAGGATGAGGTCAGAGCGGTTGGCGAGGAGCAAAGGTCAGAGGAGCCAAAGCGCAGGGTGGATACTTCAGTGTCTTGGGAGGCGTTGATTTGTGTCGGATCGTCCAAGAAGAGAGCGAGGAAGGCATCCTCCTCAGATGATGAAGGAGGGCCAAGAACACTGGGAGGGGATGGCCACAGAGCGGAGGAGGCTAGCAAAGACAAAGAAG	1	2 Base Changes	VKRATLSSTESTASGMQDEVRAVGEEQRSEEPKRRVDTSVSWEALICVGSSKKRARKASSSDDEGGPRTLGGDGHRAEEASKDKE	VKSATLSSTESTASGMQDEVRAVGEEQRSEEPKRRVDTSVSWEALICVGSSKKRARKASSSDDEGGPRTLGGDGHRAEEASKDKE
GTCAAGAGAGCCACCTTGTCCTCCACGGAGAGCACGGCGTCTGGAATGCAGGATGAGGTCAGAGCGGTTGGCGAGGAGCAAAGGTCAGAGGAGCCAAAGCGCAGGGTGGATACTTCAGTGTCTTGGGAGGCGTTGATTTGTGTCGGATCGTCCAAGAAGAGAGCGAGGAAGGCATCCTCTTAAGATGATGAAGGAGGGCCAAGAACACTGGGAGGGGATGGCCACAGAGCGGAGGAGGCTAGCAAAGACAAAGAAG	GTCAAGAGAGCCACCTTGTCCTCCACGGAGAGCACGGCGTCTGGAATGCAGGATGAGGTCAGAGCGGTTGGCGAGGAGCAAAGGTCAGAGGAGCCAAAGCGCAGGGTGGATACTTCAGTGTCTTGGGAGGCGTTGATTTGTGTCGGATCGTCCAAGAAGAGAGCGAGGAAGGCATCCTCTTAAGATGATGAAGGAGGGCCAAGAACACTGGGAGGGGATGGCCACAGAGCGGAGGAGGCTAGCAAAGACAAAGAAG	1	2 Base Changes	VKRATLSSTESTASGMQDEVRAVGEEQRSEEPKRRVDTSVSWEALICVGSSKKRARKASS*	VKSATLSSTESTASGMQDEVRAVGEEQRSEEPKRRVDTSVSWEALICVGSSKKRARKASSSDDEGGPRTLGGDGHRAEEASKDKE
GTCAAGAGAGCCACCTTGTCCTCCACGGAGAGCACGGCGTCTGGAATGCAGGATGAGGTCAGAGCGGTTGGCGAGGAGCAAAGGTCAGAGGAGCCAAAGCGCAGGGTGGATACTTCAGTGTCTTGGGAGGCGTTGATTTGTGTCGGATCGTCCAAGAAGAGAGCGAGGAAGGCATCCTCTTCAGATGAGGAAGGAGGGCCAAGAACACTGTGAGGGGATGGCCACAGAGCGGAGGAGGCTAGCAAAGACAAAGAAG	GTCAAGAGAGCCACCTTGTCCTCCACGGAGAGCACGGCGTCTGGAATGCAGGATGAGGTCAGAGCGGTTGGCGAGGAGCAAAGGTCAGAGGAGCCAAAGCGCAGGGTGGATACTTCAGTGTCTTGGGAGGCGTTGATTTGTGTCGGATCGTCCAAGAAGAGAGCGAGGAAGGCATCCTCTTCAGATGAGGAAGGAGGGCCAAGAACACTGTGAGGGGATGGCCACAGAGCGGAGGAGGCTAGCAAAGACAAAGAAG	1	3 Base Changes	VKRATLSSTESTASGMQDEVRAVGEEQRSEEPKRRVDTSVSWEALICVGSSKKRARKASSSDEEGGPRTL*	VKSATLSSTESTASGMQDEVRAVGEEQRSEEPKRRVDTSVSWEALICVGSSKKRARKASSSDDEGGPRTLGGDGHRAEEASKDKE
GTCAAGAGAGCCACCTTGTCCTCCACGGAGAGCACGGCGTCTGGAATGCAGGATGAGGTCAGAGCGGTTGGCGAGGAGCAAAGGTCAGAGGAGCCAAAGCGCAGGGTGGATACTTCAGTGTCTTGGGAGGCGTTGATTTGTGTCGGATCGTCCAAGAAGAGAGCGAGGAAGGCATCCTCTTCAGATGATGAAGGAGAGCCAAGGACACTGGGAGGGGATGGCCACAGAGCGGAGGAGGCTAGCAAAGACAAAGAAG	GTCAAGAGAGCCACCTTGTCCTCCACGGAGAGCACGGCGTCTGGAATGCAGGATGAGGTCAGAGCGGTTGGCGAGGAGCAAAGGTCAGAGGAGCCAAAGCGCAGGGTGGATACTTCAGTGTCTTGGGAGGCGTTGATTTGTGTCGGATCGTCCAAGAAGAGAGCGAGGAAGGCATCCTCTTCAGATGATGAAGGAGAGCCAAGGACACTGGGAGGGGATGGCCACAGAGCGGAGGAGGCTAGCAAAGACAAAGAAG	1	3 Base Changes	VKRATLSSTESTASGMQDEVRAVGEEQRSEEPKRRVDTSVSWEALICVGSSKKRARKASSSDDEGEPRTLGGDGHRAEEASKDKE	VKSATLSSTESTASGMQDEVRAVGEEQRSEEPKRRVDTSVSWEALICVGSSKKRARKASSSDDEGGPRTLGGDGHRAEEASKDKE
GTCAAGAGAGCCACCTTGTCCTCCACGGAGAGCACGGCGTCTGGAATGCAGGATGAGGTCAGAGCGGTTGGCGAGGAGCAAAGGTCAGAGGAGCCAAAGCGCAGGGTGGATACTTCAGTGTCTTGGGAGGCGTTGATTTGTGTCGGATCGTCCAAGAAGAGAGCGAGGAAGGCATCCTCTTCAGATGATGAAGGAGGGCAAAGAACACTGGGAGTGGATGGCCACAGAGCGGAGGAGGCTAGCAAAGACAAAGAAG	GTCAAGAGAGCCACCTTGTCCTCCACGGAGAGCACGGCGTCTGGAATGCAGGATGAGGTCAGAGCGGTTGGCGAGGAGCAAAGGTCAGAGGAGCCAAAGCGCAGGGTGGATACTTCAGTGTCTTGGGAGGCGTTGATTTGTGTCGGATCGTCCAAGAAGAGAGCGAGGAAGGCATCCTCTTCAGATGATGAAGGAGGGCAAAGAACACTGGGAGTGGATGGCCACAGAGCGGAGGAGGCTAGCAAAGACAAAGAAG	1	3 Base Changes	VKRATLSSTESTASGMQDEVRAVGEEQRSEEPKRRVDTSVSWEALICVGSSKKRARKASSSDDEGGQRTLGVDGHRAEEASKDKE	VKSATLSSTESTASGMQDEVRAVGEEQRSEEPKRRVDTSVSWEALICVGSSKKRARKASSSDDEGGPRTLGGDGHRAEEASKDKE
GTCAAGAGAGCCACCTTGTCCTCCACGGAGAGCACGGCGTCTGGAATGCAGGATGAGGTCAGAGCGGTTGGCGAGGAGCAAAGGTCAGAGGAGCCAAAGCGCAGGGTGGATACTTCAGTGTCTTGGGAGGCGTTGATTTGTGTCGGATCGTCCAAGAAGAGAGCGAGGAAGGCATCCTCTTCAGATGATGAAGGAGGGCCAAGAACACTCGGAGGGGATGGCCACAGATCGGAGGAGGCTAGCAAAGACAAAGAAG	GTCAAGAGAGCCACCTTGTCCTCCACGGAGAGCACGGCGTCTGGAATGCAGGATGAGGTCAGAGCGGTTGGCGAGGAGCAAAGGTCAGAGGAGCCAAAGCGCAGGGTGGATACTTCAGTGTCTTGGGAGGCGTTGATTTGTGTCGGATCGTCCAAGAAGAGAGCGAGGAAGGCATCCTCTTCAGATGATGAAGGAGGGCCAAGAACACTCGGAGGGGATGGCCACAGATCGGAGGAGGCTAGCAAAGACAAAGAAG	1	3 Base Changes	VKRATLSSTESTASGMQDEVRAVGEEQRSEEPKRRVDTSVSWEALICVGSSKKRARKASSSDDEGGPRTLGGDGHRSEEASKDKE	VKSATLSSTESTASGMQDEVRAVGEEQRSEEPKRRVDTSVSWEALICVGSSKKRARKASSSDDEGGPRTLGGDGHRAEEASKDKE
GTCAAGAGAGCCACCTTGTCCTCCACGGAGAGCACGGCGTCTGGAATGCAGGATGAGGTCAGAGCGGTTGGCGAGGAGCAAAGGTCAGAGGAGCCAAAGCGCAGGGTGGATACTTCAGTGTCTTGGGAGGCGTTGATTTGTGTCGGATCGTCCAAGAAGAGAGCGAGGAAGGCATCCTCTTCAGATGATGAAGGAGGGCCAAGAACACTGGGAGGGGATGGCCACACAGCGGAGGAGGCTAGCAAAGACAAAGAAG	GTCAAGAGAGCCACCTTGTCCTCCACGGAGAGCACGGCGTCTGGAATGCAGGATGAGGTCAGAGCGGTTGGCGAGGAGCAAAGGTCAGAGGAGCCAAAGCGCAGGGTGGATACTTCAGTGTCTTGGGAGGCGTTGATTTGTGTCGGATCGTCCAAGAAGAGAGCGAGGAAGGCATCCTCTTCAGATGATGAAGGAGGGCCAAGAACACTGGGAGGGGATGGCCACACAGCGGAGGAGGCTAGCAAAGACAAAGAAG	1	2 Base Changes	VKRATLSSTESTASGMQDEVRAVGEEQRSEEPKRRVDTSVSWEALICVGSSKKRARKASSSDDEGGPRTLGGDGHTAEEASKDKE	VKSATLSSTESTASGMQDEVRAVGEEQRSEEPKRRVDTSVSWEALICVGSSKKRARKASSSDDEGGPRTLGGDGHRAEEASKDKE
GTCAAGAGAGCCACCTTGTCCTCCACGGAGAGCACGGCGTCTGGAATGCAGGATGAGGTCAGAGCGGTTGGCGAGGAGCAAAGGTCAGAGGAGCCAAAGCGCAGGGTGGATACTTCAGTGTCTTGGGAGGCGTTGATTTGTGTCGGATCGTCCAAGAAGAGAGCGAGGAAGGCATCCTCTTCAGATGATGAAGGAGGGCCAAGAACACTGGGAGGGGATGGCCACAGAGCGAAGGAGGCTAGCAAAGACAAAGAAG	GTCAAGAGAGCCACCTTGTCCTCCACGGAGAGCACGGCGTCTGGAATGCAGGATGAGGTCAGAGCGGTTGGCGAGGAGCAAAGGTCAGAGGAGCCAAAGCGCAGGGTGGATACTTCAGTGTCTTGGGAGGCGTTGATTTGTGTCGGATCGTCCAAGAAGAGAGCGAGGAAGGCATCCTCTTCAGATGATGAAGGAGGGCCAAGAACACTGGGAGGGGATGGCCACAGAGCGAAGGAGGCTAGCAAAGACAAAGAAG	1	2 Base Changes	VKRATLSSTESTASGMQDEVRAVGEEQRSEEPKRRVDTSVSWEALICVGSSKKRARKASSSDDEGGPRTLGGDGHRAKEASKDKE	VKSATLSSTESTASGMQDEVRAVGEEQRSEEPKRRVDTSVSWEALICVGSSKKRARKASSSDDEGGPRTLGGDGHRAEEASKDKE
GTCAAGAGAGCCACCTTGTCCTCCACGGAGAGCACGGCGTCTGGAATGCAGGATGAGGTCAGAGCGGTTGGCGAGGAGCAAAGGTCAGAGGAGCCAAAGCGCAGGGTGGATACTTCAGTGTCTTGGGAGGCGTTGATTTGTGTCGGATCGTCCAAGAAGAGAGCGAGGAAGGCATCCTCTTCAGATGATGAAGGAGGGCCAAGAACACTGGGAGGGGATGGCCACAGAGCGGAGGAGGCTAGAAAAGACAAAGAAG	GTCAAGAGAGCCACCTTGTCCTCCACGGAGAGCACGGCGTCTGGAATGCAGGATGAGGTCAGAGCGGTTGGCGAGGAGCAAAGGTCAGAGGAGCCAAAGCGCAGGGTGGATACTTCAGTGTCTTGGGAGGCGTTGATTTGTGTCGGATCGTCCAAGAAGAGAGCGAGGAAGGCATCCTCTTCAGATGATGAAGGAGGGCCAAGAACACTGGGAGGGGATGGCCACAGAGCGGAGGAGGCTAGAAAAGACAAAGAAG	1	2 Base Changes	VKRATLSSTESTASGMQDEVRAVGEEQRSEEPKRRVDTSVSWEALICVGSSKKRARKASSSDDEGGPRTLGGDGHRAEEARKDKE	VKSATLSSTESTASGMQDEVRAVGEEQRSEEPKRRVDTSVSWEALICVGSSKKRARKASSSDDEGGPRTLGGDGHRAEEASKDKE
GTCAAGAGAGCCACCTTGTCCTCCACGGAGAGCACGGCGTCTGGAATGCAGGATGAGGTCAGAGCGGTTGGCGAGGAGCAAAGGTCAGAGGAGCCAAAGCGCAGGGTGGATACTTCAGTGTCTTGGGAGGCGTTGATTTGTGTCGGATCGTCCAAGAAGAGAGCGAGGAAGGCATCCTCTTCAGATGATGAAGGAGGGCCAAGAACACTGGGAGGGGATGGCCACAGTGCGGAGGAGGCTAGCAAAGACAAAGAAG	GTCAAGAGAGCCACCTTGTCCTCCACGGAGAGCACGGCGTCTGGAATGCAGGATGAGGTCAGAGCGGTTGGCGAGGAGCAAAGGTCAGAGGAGCCAAAGCGCAGGGTGGATACTTCAGTGTCTTGGGAGGCGTTGATTTGTGTCGGATCGTCCAAGAAGAGAGCGAGGAAGGCATCCTCTTCAGATGATGAAGGAGGGCCAAGAACACTGGGAGGGGATGGCCACAGTGCGGAGGAGGCTAGCAAAGACAAAGAAG	1	2 Base Changes	VKRATLSSTESTASGMQDEVRAVGEEQRSEEPKRRVDTSVSWEALICVGSSKKRARKASSSDDEGGPRTLGGDGHSAEEASKDKE	VKSATLSSTESTASGMQDEVRAVGEEQRSEEPKRRVDTSVSWEALICVGSSKKRARKASSSDDEGGPRTLGGDGHRAEEASKDKE
GTCAAGAGAGCCACCTTGTCCTCCACGGAGAGCACGGCGTCTGGAATGCAGGATGAGGTCAGAGCGGTTGGCGAGGAGCAAAGGTCAGAGGAGCCAAAGCGCAGGGTGGATACTTCAGTGTCTTGGGAGGCGTTGATTTGTGTCGGATCGTCCAAGAAGAGAGCGAGGAAGGCATCCTCTTCAGATGATGAAGGAGGGCCAAGAACACTGGGAGGGGATGGCCACANAGCGGAGGAGGCTAGCAAAGACAAAGAAG	GTCAAGAGAGCCACCTTGTCCTCCACGGAGAGCACGGCGTCTGGAATGCAGGATGAGGTCAGAGCGGTTGGCGAGGAGCAAAGGTCAGAGGAGCCAAAGCGCAGGGTGGATACTTCAGTGTCTTGGGAGGCGTTGATTTGTGTCGGATCGTCCAAGAAGAGAGCGAGGAAGGCATCCTCTTCAGATGATGAAGGAGGGCCAAGAACACTGGGAGGGGATGGCCACANAGCGGAGGAGGCTAGCAAAGACAAAGAAG	1	2 Base Changes	VKRATLSSTESTASGMQDEVRAVGEEQRSEEPKRRVDTSVSWEALICVGSSKKRARKASSSDDEGGPRTLGGDGHXAEEASKDKE	VKSATLSSTESTASGMQDEVRAVGEEQRSEEPKRRVDTSVSWEALICVGSSKKRARKASSSDDEGGPRTLGGDGHRAEEASKDKE
GTCAAGAGAGCCACCTTGTCCTCCACGGAGAGCACGGCGTCTGGAATGCAGGATGAGGTCAGAGCGGTTGGCGAGGAGCAAAGGTCAGAGGAGCCAAAGCGCAGGGTGGATACTTCAGTGTCTTGGGAGGCGTTGATTTGTGTCGGATCGTCCAAGAAGAGAGCGAGGAAGGCATCCTCTTCAGATGATGAAGGAGGGCCCAGAACACTGGGAGGGGACGGCCACAGAGCGGAGGAGGCTAGCAAAGACAAAGAAG	GTCAAGAGAGCCACCTTGTCCTCCACGGAGAGCACGGCGTCTGGAATGCAGGATGAGGTCAGAGCGGTTGGCGAGGAGCAAAGGTCAGAGGAGCCAAAGCGCAGGGTGGATACTTCAGTGTCTTGGGAGGCGTTGATTTGTGTCGGATCGTCCAAGAAGAGAGCGAGGAAGGCATCCTCTTCAGATGATGAAGGAGGGCCCAGAACACTGGGAGGGGACGGCCACAGAGCGGAGGAGGCTAGCAAAGACAAAGAAG	1	3 Base Changes	VKRATLSSTESTASGMQDEVRAVGEEQRSEEPKRRVDTSVSWEALICVGSSKKRARKASSSDDEGGPRTLGGDGHRAEEASKDKE	VKSATLSSTESTASGMQDEVRAVGEEQRSEEPKRRVDTSVSWEALICVGSSKKRARKASSSDDEGGPRTLGGDGHRAEEASKDKE
GTCAAGAGAGCCACCTTGTCCTCCACGGAGAGCACGGCGTCTGGAATGCAGGATGAGGTCAGAGCGGTTGGCGAGGAGCAAAGGTCAGAGGAGCCAAAGCGCAGGGTGGATACTTCAGTGTCTTGGGAGGCGTTGATTTGTGTCGGATCGTCCAAGAAGAGAGCGAGGAAGGCATCCTCTTCAGATGATGATGGAGGGCCAAGAACACTGGGAGGGGATGGCCACAGAGCGGAGGAGGCTAGCAAAGACAAAGAAG	GTCAAGAGAGCCACCTTGTCCTCCACGGAGAGCACGGCGTCTGGAATGCAGGATGAGGTCAGAGCGGTTGGCGAGGAGCAAAGGTCAGAGGAGCCAAAGCGCAGGGTGGATACTTCAGTGTCTTGGGAGGCGTTGATTTGTGTCGGATCGTCCAAGAAGAGAGCGAGGAAGGCATCCTCTTCAGATGATGATGGAGGGCCAAGAACACTGGGAGGGGATGGCCACAGAGCGGAGGAGGCTAGCAAAGACAAAGAAG	1	2 Base Changes	VKRATLSSTESTASGMQDEVRAVGEEQRSEEPKRRVDTSVSWEALICVGSSKKRARKASSSDDDGGPRTLGGDGHRAEEASKDKE	VKSATLSSTESTASGMQDEVRAVGEEQRSEEPKRRVDTSVSWEALICVGSSKKRARKASSSDDEGGPRTLGGDGHRAEEASKDKE
GTCAAGAGAGCCACCTTGTCCTCCACGGAGAGCACGGCGTCTGGAATGCAGGATGAGGTCAGAGCGGTTGGCGAGGAGCAAAGGTCAGAGGAGCCAAAGCGCAGGGTGGATACTTCAGTGTCTTGGGAGGCGTTGATTTGTGTCGGATCGTCCAAGAAGAGAGCGAGGAAGGCATTCTCTTCAGATGATGAAGGAGGGCCAAGAACACTGGGAGGGGATGGCCACAGAGCGGAGGAGGCTAGCAAAGACAAAGAAG	GTCAAGAGAGCCACCTTGTCCTCCACGGAGAGCACGGCGTCTGGAATGCAGGATGAGGTCAGAGCGGTTGGCGAGGAGCAAAGGTCAGAGGAGCCAAAGCGCAGGGTGGATACTTCAGTGTCTTGGGAGGCGTTGATTTGTGTCGGATCGTCCAAGAAGAGAGCGAGGAAGGCATTCTCTTCAGATGATGAAGGAGGGCCAAGAACACTGGGAGGGGATGGCCACAGAGCGGAGGAGGCTAGCAAAGACAAAGAAG	1	2 Base Changes	VKRATLSSTESTASGMQDEVRAVGEEQRSEEPKRRVDTSVSWEALICVGSSKKRARKAFSSDDEGGPRTLGGDGHRAEEASKDKE	VKSATLSSTESTASGMQDEVRAVGEEQRSEEPKRRVDTSVSWEALICVGSSKKRARKASSSDDEGGPRTLGGDGHRAEEASKDKE
GTCAAGAGAGCCACCTTGTCCTCCACGGAGAGCACGGCGTCTGGAATGCAGGATGAGGTCAGAGCGGTTGGCGAGGAGCAAAGGTCAGAGGAGCCAAAGCGCAGGGTGGATACTTCAGTGTCTTGGGAGGCGTTGATTTGTGTCGGATCGTCCAAGAAGAGAGCGAGGAAGGCGTCGTCTTCAGATGATGAAGGAGGGCCAAGAACACTGGGAGGGGATGGCCACAGAGCGGAGGAGGCTAGCAAAGACAAAGAAG	GTCAAGAGAGCCACCTTGTCCTCCACGGAGAGCACGGCGTCTGGAATGCAGGATGAGGTCAGAGCGGTTGGCGAGGAGCAAAGGTCAGAGGAGCCAAAGCGCAGGGTGGATACTTCAGTGTCTTGGGAGGCGTTGATTTGTGTCGGATCGTCCAAGAAGAGAGCGAGGAAGGCGTCGTCTTCAGATGATGAAGGAGGGCCAAGAACACTGGGAGGGGATGGCCACAGAGCGGAGGAGGCTAGCAAAGACAAAGAAG	1	3 Base Changes	VKRATLSSTESTASGMQDEVRAVGEEQRSEEPKRRVDTSVSWEALICVGSSKKRARKASSSDDEGGPRTLGGDGHRAEEASKDKE	VKSATLSSTESTASGMQDEVRAVGEEQRSEEPKRRVDTSVSWEALICVGSSKKRARKASSSDDEGGPRTLGGDGHRAEEASKDKE
GTCAAGAGAGCCACCTTGTCCTCCACGGAGAGCACGGCGTCTGGAATGCAGGATGAGGTCAGAGCGGTTGGCGAGGAGCAAAGGTCAGAGGAGCCAAAGCGCAGGGTGGATACTTCAGTGTCTTGGGAGGCGTTGATTTGTGTCGGATCGTCCAAGAAGAGAGCGAGGACGGCATCCTCTTCAGATGATGAAGGAGGGCCAAGAACACTGGGAGGGGATGGCCACAGAGCGGAGGAGGCTAGCAAAGACAAAGAAG	GTCAAGAGAGCCACCTTGTCCTCCACGGAGAGCACGGCGTCTGGAATGCAGGATGAGGTCAGAGCGGTTGGCGAGGAGCAAAGGTCAGAGGAGCCAAAGCGCAGGGTGGATACTTCAGTGTCTTGGGAGGCGTTGATTTGTGTCGGATCGTCCAAGAAGAGAGCGAGGACGGCATCCTCTTCAGATGATGAAGGAGGGCCAAGAACACTGGGAGGGGATGGCCACAGAGCGGAGGAGGCTAGCAAAGACAAAGAAG	1	2 Base Changes	VKRATLSSTESTASGMQDEVRAVGEEQRSEEPKRRVDTSVSWEALICVGSSKKRARTASSSDDEGGPRTLGGDGHRAEEASKDKE	VKSATLSSTESTASGMQDEVRAVGEEQRSEEPKRRVDTSVSWEALICVGSSKKRARKASSSDDEGGPRTLGGDGHRAEEASKDKE
GTCAAGAGAGCCACCTTGTCCTCCACGGAGAGCACGGCGTCTGGAATGCAGGATGAGGTCAGAGCGGTTGGCGAGGAGCAAAGGTCAGAGGAGCCAAAGCGCAGGGTGGATACTTCAGTGTCTTGGGAGGCGTTGATTTGTGTCGGATCGTCCAAGAAGGGAGCGAGGAAGGCATCCTCTTCAGATGATGAAGGAGGGCCAAGAACACTGGGAGGGGATGGCCACAGAGCGGAGGAGGCTAGAATAGACAAAGAAG	GTCAAGAGAGCCACCTTGTCCTCCACGGAGAGCACGGCGTCTGGAATGCAGGATGAGGTCAGAGCGGTTGGCGAGGAGCAAAGGTCAGAGGAGCCAAAGCGCAGGGTGGATACTTCAGTGTCTTGGGAGGCGTTGATTTGTGTCGGATCGTCCAAGAAGGGAGCGAGGAAGGCATCCTCTTCAGATGATGAAGGAGGGCCAAGAACACTGGGAGGGGATGGCCACAGAGCGGAGGAGGCTAGAATAGACAAAGAAG	1	4 Base Changes	VKRATLSSTESTASGMQDEVRAVGEEQRSEEPKRRVDTSVSWEALICVGSSKKGARKASSSDDEGGPRTLGGDGHRAEEARIDKE	VKSATLSSTESTASGMQDEVRAVGEEQRSEEPKRRVDTSVSWEALICVGSSKKRARKASSSDDEGGPRTLGGDGHRAEEASKDKE
GTCAAGAGAGCCACCTTGTCCTCCACGGAGAGCACGGCGTCTGGAATGCAGGATGAGGTCAGAGCGGTTGGCGAGGAGCAAAGGTCAGAGGAGCCAAAGCGCAGGGTGGATACTTCAGTGTCTTGGGAGGCGTTGATTTGTGTCGGATCGTCCAATAAGAGAGCGAGGAAGGCATCCTCTTCAGATGATGAAGGAGGGCCAAGAACACTGGGAGGGGATGGCTACAGAGCGGAGGAGGCTAGCAAAGACAAAGAAG	GTCAAGAGAGCCACCTTGTCCTCCACGGAGAGCACGGCGTCTGGAATGCAGGATGAGGTCAGAGCGGTTGGCGAGGAGCAAAGGTCAGAGGAGCCAAAGCGCAGGGTGGATACTTCAGTGTCTTGGGAGGCGTTGATTTGTGTCGGATCGTCCAATAAGAGAGCGAGGAAGGCATCCTCTTCAGATGATGAAGGAGGGCCAAGAACACTGGGAGGGGATGGCTACAGAGCGGAGGAGGCTAGCAAAGACAAAGAAG	1	3 Base Changes	VKRATLSSTESTASGMQDEVRAVGEEQRSEEPKRRVDTSVSWEALICVGSSNKRARKASSSDDEGGPRTLGGDGYRAEEASKDKE	VKSATLSSTESTASGMQDEVRAVGEEQRSEEPKRRVDTSVSWEALICVGSSKKRARKASSSDDEGGPRTLGGDGHRAEEASKDKE
GTCAAGAGAGCCACCTTGTCCTCCACGGAGAGCACGGCGTCTGGAATGCAGGATGAGGTCAGAGCGGTTGGCGAGGAGCAAAGGTCAGAGGAGCCAAAGCGCAGGGTGGATACTTCCGTGTCTTGGGAGGCGTTGATTTGTGTCGGATCGTCCAAGAAGAGAGCGAGGAAGGCATCCTCTTCAGATGATGAAGGAGGGCCAAGAACACTGGGAGGGGATGGCCACAGAGCGGAGGAGGCTAGCAAAGACAAAGAAG	GTCAAGAGAGCCACCTTGTCCTCCACGGAGAGCACGGCGTCTGGAATGCAGGATGAGGTCAGAGCGGTTGGCGAGGAGCAAAGGTCAGAGGAGCCAAAGCGCAGGGTGGATACTTCCGTGTCTTGGGAGGCGTTGATTTGTGTCGGATCGTCCAAGAAGAGAGCGAGGAAGGCATCCTCTTCAGATGATGAAGGAGGGCCAAGAACACTGGGAGGGGATGGCCACAGAGCGGAGGAGGCTAGCAAAGACAAAGAAG	1	2 Base Changes	VKRATLSSTESTASGMQDEVRAVGEEQRSEEPKRRVDTSVSWEALICVGSSKKRARKASSSDDEGGPRTLGGDGHRAEEASKDKE	VKSATLSSTESTASGMQDEVRAVGEEQRSEEPKRRVDTSVSWEALICVGSSKKRARKASSSDDEGGPRTLGGDGHRAEEASKDKE
GTCAAGAGAGCCACCTTGTCCTCCACGGAGAGCACGGCGTCTGGAATGCAGGATGAGGTCAGAGCGGTTGGCGAGGAGCAAAGGTCAGAGGAGCCAAAGCGCAGGGTGGATGCTTCAGTGTCTTGGGAGGCGTTGATTTGTGTAGGATCGTCCAAGAAGAGAGAGAGGAAGGCATCCTCTTCAGATGATGAAGGAGGGCCAAGAACACTGGGAGGGGATGGCCACAGAGCGGAGGAGGCTAGCAAAGACAAAGAAG	GTCAAGAGAGCCACCTTGTCCTCCACGGAGAGCACGGCGTCTGGAATGCAGGATGAGGTCAGAGCGGTTGGCGAGGAGCAAAGGTCAGAGGAGCCAAAGCGCAGGGTGGATGCTTCAGTGTCTTGGGAGGCGTTGATTTGTGTAGGATCGTCCAAGAAGAGAGAGAGGAAGGCATCCTCTTCAGATGATGAAGGAGGGCCAAGAACACTGGGAGGGGATGGCCACAGAGCGGAGGAGGCTAGCAAAGACAAAGAAG	1	4 Base Changes	VKRATLSSTESTASGMQDEVRAVGEEQRSEEPKRRVDASVSWEALICVGSSKKRERKASSSDDEGGPRTLGGDGHRAEEASKDKE	VKSATLSSTESTASGMQDEVRAVGEEQRSEEPKRRVDTSVSWEALICVGSSKKRARKASSSDDEGGPRTLGGDGHRAEEASKDKE
GTCAAGAGAGCCACCTTGTCCTCCACGGAGAGCACGGCGTCTGGAATGCAGGATGAGGTCAGAGCGGTTGGCGAGGAGCAAAGGTCAGAGGAGCCAAAGCGCAGGGTTGATACTTCAGTGTCTTGGGAGGCTTTGATTTGTGTCGGATCGTCCAAGAAGAGAGCGAGGAAGGCATCCTCTTCAGATGATGAAGGAGGGCCAAGAACACTGGGAGGGGATGGCCACAGAGCGTAGGAGGCTAGCAAAGACAAAGAAG	GTCAAGAGAGCCACCTTGTCCTCCACGGAGAGCACGGCGTCTGGAATGCAGGATGAGGTCAGAGCGGTTGGCGAGGAGCAAAGGTCAGAGGAGCCAAAGCGCAGGGTTGATACTTCAGTGTCTTGGGAGGCTTTGATTTGTGTCGGATCGTCCAAGAAGAGAGCGAGGAAGGCATCCTCTTCAGATGATGAAGGAGGGCCAAGAACACTGGGAGGGGATGGCCACAGAGCGTAGGAGGCTAGCAAAGACAAAGAAG	1	4 Base Changes	VKRATLSSTESTASGMQDEVRAVGEEQRSEEPKRRVDTSVSWEALICVGSSKKRARKASSSDDEGGPRTLGGDGHRA*	VKSATLSSTESTASGMQDEVRAVGEEQRSEEPKRRVDTSVSWEALICVGSSKKRARKASSSDDEGGPRTLGGDGHRAEEASKDKE
GTCAAGAGAGCCACCTTGTCCTCCACGGAGAGCACGGCGTCTGGAATGCAGGATGAGGTCAGAGCGGTTGGCGAGGAGCAAAGGTCAGAGGAGCCAAAGCGCAGTGTGGATACTTCAGTGTCTTGGGAGGCGTTGATTTGTGTCGGATCGTCCAAGAAGAGAGCGAGGAAGGCATCCTCTTCAGATGATGAAGGAGGGCCAAGAACACTGGGAGGGGATGGCCACAGAGCGGAGGAGGCTAGCAAAGACAAAGAAG	GTCAAGAGAGCCACCTTGTCCTCCACGGAGAGCACGGCGTCTGGAATGCAGGATGAGGTCAGAGCGGTTGGCGAGGAGCAAAGGTCAGAGGAGCCAAAGCGCAGTGTGGATACTTCAGTGTCTTGGGAGGCGTTGATTTGTGTCGGATCGTCCAAGAAGAGAGCGAGGAAGGCATCCTCTTCAGATGATGAAGGAGGGCCAAGAACACTGGGAGGGGATGGCCACAGAGCGGAGGAGGCTAGCAAAGACAAAGAAG	1	2 Base Changes	VKRATLSSTESTASGMQDEVRAVGEEQRSEEPKRSVDTSVSWEALICVGSSKKRARKASSSDDEGGPRTLGGDGHRAEEASKDKE	VKSATLSSTESTASGMQDEVRAVGEEQRSEEPKRRVDTSVSWEALICVGSSKKRARKASSSDDEGGPRTLGGDGHRAEEASKDKE
GTCAAGAGAGCCACCTTGTCCTCCACGGAGAGCACGGCGTCTGGAATGCAGGATGAGGTCAGAGCGGTTGGCGAGGAGCAAAGGTCAGAGGAGCCAAAGCGCTGGGTGGATACTTCAGTGTCTTGGGAGGCGTTGATTTGTGTCGGATCGTCCAAGAAGAGTGCGAGGAAGGCATCCTCTTCAGATGATGAAGGAGGGCCAAGAACACTGGGAGGGGATGGCCACAGAGCGGAGGAGGCTAGCAAAGACAAAGAAG	GTCAAGAGAGCCACCTTGTCCTCCACGGAGAGCACGGCGTCTGGAATGCAGGATGAGGTCAGAGCGGTTGGCGAGGAGCAAAGGTCAGAGGAGCCAAAGCGCTGGGTGGATACTTCAGTGTCTTGGGAGGCGTTGATTTGTGTCGGATCGTCCAAGAAGAGTGCGAGGAAGGCATCCTCTTCAGATGATGAAGGAGGGCCAAGAACACTGGGAGGGGATGGCCACAGAGCGGAGGAGGCTAGCAAAGACAAAGAAG	1	3 Base Changes	VKRATLSSTESTASGMQDEVRAVGEEQRSEEPKRWVDTSVSWEALICVGSSKKSARKASSSDDEGGPRTLGGDGHRAEEASKDKE	VKSATLSSTESTASGMQDEVRAVGEEQRSEEPKRRVDTSVSWEALICVGSSKKRARKASSSDDEGGPRTLGGDGHRAEEASKDKE
GTCAAGAGAGCCACCTTGTCCTCCACGGAGAGCACGGCGTCTGGAATGCAGGATGAGGTCAGAGCGGTTGGCGAGGAGCAAAGGTCAGAGGAGCCAAAGCTCAGGGTGGATACTTCAGTGTCTTGGGAGGCGTTGATTTGTGTCGGATCGTCCAAGAAGAGAGCGAGGAAGGCATCCTCTTCAGATGATGAAGGAGGGCCAAGAACACTGGGAGGGGATGGCCACAGAGCGGAGGAGGCTAGCAAAGACAAAGAAG	GTCAAGAGAGCCACCTTGTCCTCCACGGAGAGCACGGCGTCTGGAATGCAGGATGAGGTCAGAGCGGTTGGCGAGGAGCAAAGGTCAGAGGAGCCAAAGCTCAGGGTGGATACTTCAGTGTCTTGGGAGGCGTTGATTTGTGTCGGATCGTCCAAGAAGAGAGCGAGGAAGGCATCCTCTTCAGATGATGAAGGAGGGCCAAGAACACTGGGAGGGGATGGCCACAGAGCGGAGGAGGCTAGCAAAGACAAAGAAG	1	2 Base Changes	VKRATLSSTESTASGMQDEVRAVGEEQRSEEPKLRVDTSVSWEALICVGSSKKRARKASSSDDEGGPRTLGGDGHRAEEASKDKE	VKSATLSSTESTASGMQDEVRAVGEEQRSEEPKRRVDTSVSWEALICVGSSKKRARKASSSDDEGGPRTLGGDGHRAEEASKDKE
GTCAAGAGAGCCACCTTGTCCTCCACGGAGAGCACGGCGTCTGGAATGCAGGATGAGGTCAGAGCGGTTGGCGAGGAGCAAAGGTCAGAGGAGCCAAATCGCAGGGTGGATACTTCAGTGTCTTGGGAGGCGTTGATTTGTGTCGGATCGTCCAAGAAGAGAGCGAGGAAGGCATCCTCTTCAGATGATGAAGGAGGGCCAAGAACACTGGGAGGGGATGGCCACAGAGCGGAGGAGGCTAGCAAAGACAAAGAAG	GTCAAGAGAGCCACCTTGTCCTCCACGGAGAGCACGGCGTCTGGAATGCAGGATGAGGTCAGAGCGGTTGGCGAGGAGCAAAGGTCAGAGGAGCCAAATCGCAGGGTGGATACTTCAGTGTCTTGGGAGGCGTTGATTTGTGTCGGATCGTCCAAGAAGAGAGCGAGGAAGGCATCCTCTTCAGATGATGAAGGAGGGCCAAGAACACTGGGAGGGGATGGCCACAGAGCGGAGGAGGCTAGCAAAGACAAAGAAG	1	2 Base Changes	VKRATLSSTESTASGMQDEVRAVGEEQRSEEPNRRVDTSVSWEALICVGSSKKRARKASSSDDEGGPRTLGGDGHRAEEASKDKE	VKSATLSSTESTASGMQDEVRAVGEEQRSEEPKRRVDTSVSWEALICVGSSKKRARKASSSDDEGGPRTLGGDGHRAEEASKDKE
GTCAAGAGAGCCACCTTGTCCTCCACGGAGAGCACGGCGTCTGGAATGCAGGATGAGGTCAGAGCGGTTGGCGAGGAGCAAAGGTCAGAGGAGCCAATGCGCAGGGTGGATACTTCAGTGTCTTGGGAGGAGTTGATTTGTGTCGGATCGTCCAAGAAGAGAGCGAGGAAGGCATCCTCTTCAGATGATGAAGGAGGGCCAAGAACACTGGGAGGGGATGGCCACAGAGCGGAGGAGGCTAGCAAAGACAAAGAAG	GTCAAGAGAGCCACCTTGTCCTCCACGGAGAGCACGGCGTCTGGAATGCAGGATGAGGTCAGAGCGGTTGGCGAGGAGCAAAGGTCAGAGGAGCCAATGCGCAGGGTGGATACTTCAGTGTCTTGGGAGGAGTTGATTTGTGTCGGATCGTCCAAGAAGAGAGCGAGGAAGGCATCCTCTTCAGATGATGAAGGAGGGCCAAGAACACTGGGAGGGGATGGCCACAGAGCGGAGGAGGCTAGCAAAGACAAAGAAG	1	3 Base Changes	VKRATLSSTESTASGMQDEVRAVGEEQRSEEPMRRVDTSVSWEELICVGSSKKRARKASSSDDEGGPRTLGGDGHRAEEASKDKE	VKSATLSSTESTASGMQDEVRAVGEEQRSEEPKRRVDTSVSWEALICVGSSKKRARKASSSDDEGGPRTLGGDGHRAEEASKDKE
GTCAAGAGAGCCACCTTGTCCTCCACGGAGAGCACGGCGTCTGGAATGCAGGATGAGGTCAGAGCGGTTGGCGAGGAGCAAAGGTCAGAGGAGCCACAGCGCAGGGTGGATACTTCAGTGTCTTGGGAGGCGTTGATTTGTGTCGGATCGTCCAAGAAGAGAGCGAGGAAGGCATCCTCTTCAGATTATGAAGGAGGGCCAAGAACACTGGGAGGGGATGGCCACAGAGCGGAGGAGGCTAGCAAAGACAAAGAAG	GTCAAGAGAGCCACCTTGTCCTCCACGGAGAGCACGGCGTCTGGAATGCAGGATGAGGTCAGAGCGGTTGGCGAGGAGCAAAGGTCAGAGGAGCCACAGCGCAGGGTGGATACTTCAGTGTCTTGGGAGGCGTTGATTTGTGTCGGATCGTCCAAGAAGAGAGCGAGGAAGGCATCCTCTTCAGATTATGAAGGAGGGCCAAGAACACTGGGAGGGGATGGCCACAGAGCGGAGGAGGCTAGCAAAGACAAAGAAG	1	3 Base Changes	VKRATLSSTESTASGMQDEVRAVGEEQRSEEPQRRVDTSVSWEALICVGSSKKRARKASSSDYEGGPRTLGGDGHRAEEASKDKE	VKSATLSSTESTASGMQDEVRAVGEEQRSEEPKRRVDTSVSWEALICVGSSKKRARKASSSDDEGGPRTLGGDGHRAEEASKDKE
GTCAAGAGAGCCACCTTGTCCTCCACGGAGAGCACGGCGTCTGGAATGCAGGATGAGGTCAGAGCGGTTGGCGAGGAGCAAAGGTCAGGGGAGCCAAAGCGCAGGGTGGATACTTCAGTGTCTTGGGAGGCGTTGATTTGTGTCGGATCGTCCAAGAAGAGAGCGAGGAAGGCATCCTCTTCAGATGATGAAGGAGGGCCAAGAACACTGGGAGGGGATGGCCACAGAGCGGAGGAGGCTAGCAAAGAAAAAGAAG	GTCAAGAGAGCCACCTTGTCCTCCACGGAGAGCACGGCGTCTGGAATGCAGGATGAGGTCAGAGCGGTTGGCGAGGAGCAAAGGTCAGGGGAGCCAAAGCGCAGGGTGGATACTTCAGTGTCTTGGGAGGCGTTGATTTGTGTCGGATCGTCCAAGAAGAGAGCGAGGAAGGCATCCTCTTCAGATGATGAAGGAGGGCCAAGAACACTGGGAGGGGATGGCCACAGAGCGGAGGAGGCTAGCAAAGAAAAAGAAG	1	3 Base Changes	VKRATLSSTESTASGMQDEVRAVGEEQRSGEPKRRVDTSVSWEALICVGSSKKRARKASSSDDEGGPRTLGGDGHRAEEASKEKE	VKSATLSSTESTASGMQDEVRAVGEEQRSEEPKRRVDTSVSWEALICVGSSKKRARKASSSDDEGGPRTLGGDGHRAEEASKDKE
GTCAAGAGAGCCACCTTGTCCTCCACGGAGAGCACGGCGTCTGGAATGCAGGATGAGGTCAGAGCGGTTGGCGAGGAGCAAAGGTGAGAGTAGCCAAAGCGTAGGGTGGATACTTCAGTGTCTTGGGAGGCGTTGATTTGTGTCGTATCGTCCAAGTAGAGAGCGAGTAAGGCATCCTATTCAGATTATGAAGGAGGGCCAAGAACAATGGGAGGGGATGGCCACAGATCGGAGGAGTCTATCAAAGACAAAGAAG	GTCAAGAGAGCCACCTTGTCCTCCACGGAGAGCACGGCGTCTGGAATGCAGGATGAGGTCAGAGCGGTTGGCGAGGAGCAAAGGTGAGAGTAGCCAAAGCGTAGGGTGGATACTTCAGTGTCTTGGGAGGCGTTGATTTGTGTCGTATCGTCCAAGTAGAGAGCGAGTAAGGCATCCTATTCAGATTATGAAGGAGGGCCAAGAACAATGGGAGGGGATGGCCACAGATCGGAGGAGTCTATCAAAGACAAAGAAG	1	13 Base Changes	VKRATLSSTESTASGMQDEVRAVGEEQR*	VKSATLSSTESTASGMQDEVRAVGEEQRSEEPKRRVDTSVSWEALICVGSSKKRARKASSSDDEGGPRTLGGDGHRAEEASKDKE
GTCAAGAGAGCCACCTTGTCCTCCACGGAGAGCACGGCGTCTGGAATGCAGGATGATGTCAGAGCGGTTGGCGAGGAGCAAAGGTCAGAGGAGCCAAAGCGCAGGGTGGATAGTTCAGTGTCTTGGGAGGAGTTGATTTGTGTCGGATCGTCCAAGAAGAGAGCGAGGAAGGCATCCTCTTCAGATGATGAAGGAGGGCCAAGAACACTGGGAGGGGATGGCCACAGAGCGGAGGAGGCTAGCAAAGACAAAGAAG	GTCAAGAGAGCCACCTTGTCCTCCACGGAGAGCACGGCGTCTGGAATGCAGGATGATGTCAGAGCGGTTGGCGAGGAGCAAAGGTCAGAGGAGCCAAAGCGCAGGGTGGATAGTTCAGTGTCTTGGGAGGAGTTGATTTGTGTCGGATCGTCCAAGAAGAGAGCGAGGAAGGCATCCTCTTCAGATGATGAAGGAGGGCCAAGAACACTGGGAGGGGATGGCCACAGAGCGGAGGAGGCTAGCAAAGACAAAGAAG	1	4 Base Changes	VKRATLSSTESTASGMQDDVRAVGEEQRSEEPKRRVDSSVSWEELICVGSSKKRARKASSSDDEGGPRTLGGDGHRAEEASKDKE	VKSATLSSTESTASGMQDEVRAVGEEQRSEEPKRRVDTSVSWEALICVGSSKKRARKASSSDDEGGPRTLGGDGHRAEEASKDKE
GTCAAGAGAGCCACCTTGTCCTCCACGGAGAGCACGGCGTCTGGAATGCTGGATGAGGTCAGAGCGGTTGGCGAGGAGCAAAGGTCAGAGGAGCCAAAGCGCAGGGTGGATACTTCAGTGTCTTGGGAGGCGTTGATTTGTGTCGGATCGTCCAAGAAGAGAGCGAGGAAGGCATCCTCTTCAGATGATGAAGGAGGGCCAAGAACACTGGGAGGGGATGGCCACAGAGCGGAGGAGGCTAGCAAAGACAAAGAAG	GTCAAGAGAGCCACCTTGTCCTCCACGGAGAGCACGGCGTCTGGAATGCTGGATGAGGTCAGAGCGGTTGGCGAGGAGCAAAGGTCAGAGGAGCCAAAGCGCAGGGTGGATACTTCAGTGTCTTGGGAGGCGTTGATTTGTGTCGGATCGTCCAAGAAGAGAGCGAGGAAGGCATCCTCTTCAGATGATGAAGGAGGGCCAAGAACACTGGGAGGGGATGGCCACAGAGCGGAGGAGGCTAGCAAAGACAAAGAAG	1	2 Base Changes	VKRATLSSTESTASGMLDEVRAVGEEQRSEEPKRRVDTSVSWEALICVGSSKKRARKASSSDDEGGPRTLGGDGHRAEEASKDKE	VKSATLSSTESTASGMQDEVRAVGEEQRSEEPKRRVDTSVSWEALICVGSSKKRARKASSSDDEGGPRTLGGDGHRAEEASKDKE
GTCAAGAGAGCCACCTTGTCCTCCACGGAGAGCACGGCGTCTGGTATGCAGGATGAGGTCAGAGCGGTTGGCGAGGAGCAAAGGTGAGAGGAGCCAAAGCGCAGGGTGGATACTTCAGTGTCTTGGGAGGGGTTGATTTGTGTCGGATCGTCCAAGAAGAGAGCGAGGAAGGCATCGTCTTCAGATGATGAAGGAGGGCCAAGAACACTGGGAGGGGATGGCCACAGAGCGGAGGAGGCTAGCAAAGACAAAGAAG	GTCAAGAGAGCCACCTTGTCCTCCACGGAGAGCACGGCGTCTGGTATGCAGGATGAGGTCAGAGCGGTTGGCGAGGAGCAAAGGTGAGAGGAGCCAAAGCGCAGGGTGGATACTTCAGTGTCTTGGGAGGGGTTGATTTGTGTCGGATCGTCCAAGAAGAGAGCGAGGAAGGCATCGTCTTCAGATGATGAAGGAGGGCCAAGAACACTGGGAGGGGATGGCCACAGAGCGGAGGAGGCTAGCAAAGACAAAGAAG	1	5 Base Changes	VKRATLSSTESTASGMQDEVRAVGEEQR*	VKSATLSSTESTASGMQDEVRAVGEEQRSEEPKRRVDTSVSWEALICVGSSKKRARKASSSDDEGGPRTLGGDGHRAEEASKDKE
GTCAAGAGAGCCACCTTGTCCTCCACGGAGAGCACGGCGTCTGTAATGCAGGATGAGGTCAGAGCGGTTGGCGAGGAGCAAAGGTCAGAGGAGCCAAAGCGCAGGGTGGATACTTCAGTGTCTTGGGAGGCGTTGATTTGTGTCGGATCGTCCAAGAAGAGAGCGAGGAAGGCATCCTCTTCAGATGATGAAGGAGGGCCAAGAACACTGGGAGGGGATGGCCACAGAGCGGAGTAGGCTAGCAAAGACAAAGAAG	GTCAAGAGAGCCACCTTGTCCTCCACGGAGAGCACGGCGTCTGTAATGCAGGATGAGGTCAGAGCGGTTGGCGAGGAGCAAAGGTCAGAGGAGCCAAAGCGCAGGGTGGATACTTCAGTGTCTTGGGAGGCGTTGATTTGTGTCGGATCGTCCAAGAAGAGAGCGAGGAAGGCATCCTCTTCAGATGATGAAGGAGGGCCAAGAACACTGGGAGGGGATGGCCACAGAGCGGAGTAGGCTAGCAAAGACAAAGAAG	1	3 Base Changes	VKRATLSSTESTASVMQDEVRAVGEEQRSEEPKRRVDTSVSWEALICVGSSKKRARKASSSDDEGGPRTLGGDGHRAE*	VKSATLSSTESTASGMQDEVRAVGEEQRSEEPKRRVDTSVSWEALICVGSSKKRARKASSSDDEGGPRTLGGDGHRAEEASKDKE
GTCAAGAGAGCCACCTTGTCCTCCACGGAGATCACGGAGTCTGGAATGCAGGATGAGGTCAGAGCGGTTGTCGAGGAGCAAAGGTCAGAGGAGCCAAAGCGCAGGGTGGATACTTCAGTGTCTTGGTAGGCGTTGATTTGTGTCGGATCGTCCAAGAAGAGAGCGAGGAAGGCATCCTCTTCAGATGATGAAGGAGTGCCAATAACACTGGGAGGGGATGGCCACAGAGCGGAGGAGGCTAGCAAAGACAAAGAAG	GTCAAGAGAGCCACCTTGTCCTCCACGGAGATCACGGAGTCTGGAATGCAGGATGAGGTCAGAGCGGTTGTCGAGGAGCAAAGGTCAGAGGAGCCAAAGCGCAGGGTGGATACTTCAGTGTCTTGGTAGGCGTTGATTTGTGTCGGATCGTCCAAGAAGAGAGCGAGGAAGGCATCCTCTTCAGATGATGAAGGAGTGCCAATAACACTGGGAGGGGATGGCCACAGAGCGGAGGAGGCTAGCAAAGACAAAGAAG	1	7 Base Changes	VKRATLSSTEITESGMQDEVRAVVEEQRSEEPKRRVDTSVSW*	VKSATLSSTESTASGMQDEVRAVGEEQRSEEPKRRVDTSVSWEALICVGSSKKRARKASSSDDEGGPRTLGGDGHRAEEASKDKE
GTCAAGAGAGCCACCTTGTCCTCCACGGCGAGCACGGCGAATGGAATGCAGGCTGAGGTCAGAGCGGTTGGCGAGGAGCACAGGACAGAGGAGCCAAAGCGCAGGGTGGATACTTCAGTGTCTTGGGAGGCGTTGATTTGTGTCGGATCGTCCAAGAAGAGAGCGAGGAAGGCATCCTCTTCAGATGATGAAGGAGGGCCAAGAACACTGGGAGGGGATGGCCACAGAGCGGAGGAGGCTAGCAAAGACAAAGAAG	GTCAAGAGAGCCACCTTGTCCTCCACGGCGAGCACGGCGAATGGAATGCAGGCTGAGGTCAGAGCGGTTGGCGAGGAGCACAGGACAGAGGAGCCAAAGCGCAGGGTGGATACTTCAGTGTCTTGGGAGGCGTTGATTTGTGTCGGATCGTCCAAGAAGAGAGCGAGGAAGGCATCCTCTTCAGATGATGAAGGAGGGCCAAGAACACTGGGAGGGGATGGCCACAGAGCGGAGGAGGCTAGCAAAGACAAAGAAG	1	7 Base Changes	VKRATLSSTASTANGMQAEVRAVGEEHRTEEPKRRVDTSVSWEALICVGSSKKRARKASSSDDEGGPRTLGGDGHRAEEASKDKE	VKSATLSSTESTASGMQDEVRAVGEEQRSEEPKRRVDTSVSWEALICVGSSKKRARKASSSDDEGGPRTLGGDGHRAEEASKDKE
GTCAAGAGAGCCACCTTGTCCTCCACGTAGAGCACGGCGTCTGGAATGCAGGATGAGGTCAGAGCGGTTGGCGAGGAGCAAAGGTCAGAGGAGCCAAAGCGCAGGGTGGATACTTCAGTGTCTTGGGAGGCGTTGATTTGTGTCGGATCGTCCAAGAAGAGAGCGAGGAAGGCATCCTCTTCAGATGATGAAGGAGGGCCAAGAACACTGGGAGGGGATGGCCACAGAGCGGAGGAGGCTAGCAAAGACAAAGAAG	GTCAAGAGAGCCACCTTGTCCTCCACGTAGAGCACGGCGTCTGGAATGCAGGATGAGGTCAGAGCGGTTGGCGAGGAGCAAAGGTCAGAGGAGCCAAAGCGCAGGGTGGATACTTCAGTGTCTTGGGAGGCGTTGATTTGTGTCGGATCGTCCAAGAAGAGAGCGAGGAAGGCATCCTCTTCAGATGATGAAGGAGGGCCAAGAACACTGGGAGGGGATGGCCACAGAGCGGAGGAGGCTAGCAAAGACAAAGAAG	1	2 Base Changes	VKRATLSST*	VKSATLSSTESTASGMQDEVRAVGEEQRSEEPKRRVDTSVSWEALICVGSSKKRARKASSSDDEGGPRTLGGDGHRAEEASKDKE
GTCAAGAGAGCCACCTTGTCCTCCACGTAGAGCACGTCGTCTGGAATGCAGTATGAGGTCAGAGCGGTTGGCGAGTAGCAAAGGTCAGAGGAGCCAAAGCGCAGGGTGGATACTTCAGTGTCTTGTGAGGCGTTGATTTGTGTCGGATCGTCCAAGAAGAGAGCGAGGAAGGCATCCTCCTCAGATGATGAATGAGGGCCAAGAACACTGGTAGGGGATGGCCACAGTGCGGAGGTGGCTAGCTTAGACAAAGAAG	GTCAAGAGAGCCACCTTGTCCTCCACGTAGAGCACGTCGTCTGGAATGCAGTATGAGGTCAGAGCGGTTGGCGAGTAGCAAAGGTCAGAGGAGCCAAAGCGCAGGGTGGATACTTCAGTGTCTTGTGAGGCGTTGATTTGTGTCGGATCGTCCAAGAAGAGAGCGAGGAAGGCATCCTCCTCAGATGATGAATGAGGGCCAAGAACACTGGTAGGGGATGGCCACAGTGCGGAGGTGGCTAGCTTAGACAAAGAAG	1	13 Base Changes	VKRATLSST*	VKSATLSSTESTASGMQDEVRAVGEEQRSEEPKRRVDTSVSWEALICVGSSKKRARKASSSDDEGGPRTLGGDGHRAEEASKDKE
GTCAAGAGAGCCACCTTTTCCTCAACGGAGAGCACGGCGTCTGGAATGCAGGATGAGGTCAGAGCGGTTGGCGTGGAGCAAAGGTCAGAGGAGCCAAAGCGCAGGGTGGATACTTCAGTGTCTTGGGAGGCGTTGATTTGTGTCGGATCGTCCAAGAAGAGAGCGAGGAAGGCATCCTCTTCAGATGATGAAGGAGGGCCAAGAACACTGGGAGGGGATGGCCACAGAGCGGAGGAGGCTAGCAAAGACAAAGAAG	GTCAAGAGAGCCACCTTTTCCTCAACGGAGAGCACGGCGTCTGGAATGCAGGATGAGGTCAGAGCGGTTGGCGTGGAGCAAAGGTCAGAGGAGCCAAAGCGCAGGGTGGATACTTCAGTGTCTTGGGAGGCGTTGATTTGTGTCGGATCGTCCAAGAAGAGAGCGAGGAAGGCATCCTCTTCAGATGATGAAGGAGGGCCAAGAACACTGGGAGGGGATGGCCACAGAGCGGAGGAGGCTAGCAAAGACAAAGAAG	1	4 Base Changes	VKRATFSSTESTASGMQDEVRAVGVEQRSEEPKRRVDTSVSWEALICVGSSKKRARKASSSDDEGGPRTLGGDGHRAEEASKDKE	VKSATLSSTESTASGMQDEVRAVGEEQRSEEPKRRVDTSVSWEALICVGSSKKRARKASSSDDEGGPRTLGGDGHRAEEASKDKE
GTCAAGAGAGCCACCTTTTCCTCCACGGAGAGCACGGCGTCTGGAATGCAGGATGAGGTCAGAGCGGTTGGCGAGGAGCAAAGGTCAGAGGAGCCAAAGCGCAGGGTGGATACTTCAGTGTCTTGGGAGGCGTTGATTTGTGTCGGATCGTCCAAGAAGAGAGCGAGGAAGGCATCCTCTTCAGATGATGAAGGAGGGCCAAGAACACTGGGAGGGGATGGTCACAGAGCGGAGGAGGCTAGCAAAGACAAAGAAG	GTCAAGAGAGCCACCTTTTCCTCCACGGAGAGCACGGCGTCTGGAATGCAGGATGAGGTCAGAGCGGTTGGCGAGGAGCAAAGGTCAGAGGAGCCAAAGCGCAGGGTGGATACTTCAGTGTCTTGGGAGGCGTTGATTTGTGTCGGATCGTCCAAGAAGAGAGCGAGGAAGGCATCCTCTTCAGATGATGAAGGAGGGCCAAGAACACTGGGAGGGGATGGTCACAGAGCGGAGGAGGCTAGCAAAGACAAAGAAG	1	3 Base Changes	VKRATFSSTESTASGMQDEVRAVGEEQRSEEPKRRVDTSVSWEALICVGSSKKRARKASSSDDEGGPRTLGGDGHRAEEASKDKE	VKSATLSSTESTASGMQDEVRAVGEEQRSEEPKRRVDTSVSWEALICVGSSKKRARKASSSDDEGGPRTLGGDGHRAEEASKDKE
GTCAAGAGAGCCACCTTTTCCTCCACGGAGAGCACGGCGTCTGGAATGCAGGATGAGGTCAGAGCGGTTGGCGAGGAGCAAAGGTCAGAGGAGCCAAAGCGCAGGGTGGATACTTCAGTGTCTTGGGAGGCGTTTATTTTTGTCGGATCGTCCAAGAAGAGAGCGAGGAAGGCATCCTCTTCAGATGATGAAGGAGGGCCAAGAACACTGGGAGGGGATGGCCACAGAGCGGAGGAGGCTAGCAAAGACAAAGAAG	GTCAAGAGAGCCACCTTTTCCTCCACGGAGAGCACGGCGTCTGGAATGCAGGATGAGGTCAGAGCGGTTGGCGAGGAGCAAAGGTCAGAGGAGCCAAAGCGCAGGGTGGATACTTCAGTGTCTTGGGAGGCGTTTATTTTTGTCGGATCGTCCAAGAAGAGAGCGAGGAAGGCATCCTCTTCAGATGATGAAGGAGGGCCAAGAACACTGGGAGGGGATGGCCACAGAGCGGAGGAGGCTAGCAAAGACAAAGAAG	1	4 Base Changes	VKRATFSSTESTASGMQDEVRAVGEEQRSEEPKRRVDTSVSWEAFIFVGSSKKRARKASSSDDEGGPRTLGGDGHRAEEASKDKE	VKSATLSSTESTASGMQDEVRAVGEEQRSEEPKRRVDTSVSWEALICVGSSKKRARKASSSDDEGGPRTLGGDGHRAEEASKDKE
GTCAAGAGAGCCACCTTTTCCTCCACGGAGAGCACGGCGTCTGGAATGCAGGATGAGGTCAGAGCGGTTGGCGAGGGGCAAAGGTCAGAGGAGCCAAAGCGCAGGGTGGATACTTCAGTGTCTTGGGAGGCGTTGATTTGTGTCGGATCGTCCAAGAAGAGAGCGAGGAAGGCATCCTCTTCAGATGATGAAGGAGGGCCAAGAACACTGGGAGGGGATGGCCACAGAGCGGAGGAGGCTAGCAAAGACAAAGAAG	GTCAAGAGAGCCACCTTTTCCTCCACGGAGAGCACGGCGTCTGGAATGCAGGATGAGGTCAGAGCGGTTGGCGAGGGGCAAAGGTCAGAGGAGCCAAAGCGCAGGGTGGATACTTCAGTGTCTTGGGAGGCGTTGATTTGTGTCGGATCGTCCAAGAAGAGAGCGAGGAAGGCATCCTCTTCAGATGATGAAGGAGGGCCAAGAACACTGGGAGGGGATGGCCACAGAGCGGAGGAGGCTAGCAAAGACAAAGAAG	1	3 Base Changes	VKRATFSSTESTASGMQDEVRAVGEGQRSEEPKRRVDTSVSWEALICVGSSKKRARKASSSDDEGGPRTLGGDGHRAEEASKDKE	VKSATLSSTESTASGMQDEVRAVGEEQRSEEPKRRVDTSVSWEALICVGSSKKRARKASSSDDEGGPRTLGGDGHRAEEASKDKE
GTCAAGAGCGCCACCTCGTCCTCCACGGAGAGCACGGCGTCTGGAATGCAGGATGAGGTCAGAGCGGTTGGCGAGGAGCAGAGGTCAGAGGAGCCAAAGCGCAGGGTGGATACTTCAGTGTCTTGGGAGGCGTTGATTTGTGTCGGATCGTCCAAGAGGAGAGCGAGGAAGGCATCCTCTTCAGATGATGAAGGAGGGCCAAGAACACTGGGAGGGGATGGCCACAGAGCGGAGGAGGCTAGCAAAGACAAAGAAG	GTCAAGAGCGCCACCTCGTCCTCCACGGAGAGCACGGCGTCTGGAATGCAGGATGAGGTCAGAGCGGTTGGCGAGGAGCAGAGGTCAGAGGAGCCAAAGCGCAGGGTGGATACTTCAGTGTCTTGGGAGGCGTTGATTTGTGTCGGATCGTCCAAGAGGAGAGCGAGGAAGGCATCCTCTTCAGATGATGAAGGAGGGCCAAGAACACTGGGAGGGGATGGCCACAGAGCGGAGGAGGCTAGCAAAGACAAAGAAG	1	4 Base Changes	VKSATSSSTESTASGMQDEVRAVGEEQRSEEPKRRVDTSVSWEALICVGSSKRRARKASSSDDEGGPRTLGGDGHRAEEASKDKE	VKSATLSSTESTASGMQDEVRAVGEEQRSEEPKRRVDTSVSWEALICVGSSKKRARKASSSDDEGGPRTLGGDGHRAEEASKDKE
GTCAAGAGCGCCACCTTGTACTCCACGGAGAGCACGGCGTCTTGAATGCAGGATGAGGTCAGAGCGGTTGGCGAGGAGCAAAGGTCAGAGGAGCCAAAGCGCAGGGTGGATACTTCAGTGTCTTGGGAGGCGTTGATTTGTGTCGGATCGTCCAAGAAGAGAGCGAGGAAGGCATCCTCTTCAGATGATGAAGGAGGGCCAAGAACACTGGGAGGGGATGGCCACAGAGCGGAGGAGGCTAGCAAAGACAAAGAAG	GTCAAGAGCGCCACCTTGTACTCCACGGAGAGCACGGCGTCTTGAATGCAGGATGAGGTCAGAGCGGTTGGCGAGGAGCAAAGGTCAGAGGAGCCAAAGCGCAGGGTGGATACTTCAGTGTCTTGGGAGGCGTTGATTTGTGTCGGATCGTCCAAGAAGAGAGCGAGGAAGGCATCCTCTTCAGATGATGAAGGAGGGCCAAGAACACTGGGAGGGGATGGCCACAGAGCGGAGGAGGCTAGCAAAGACAAAGAAG	1	3 Base Changes	VKSATLYSTESTAS*	VKSATLSSTESTASGMQDEVRAVGEEQRSEEPKRRVDTSVSWEALICVGSSKKRARKASSSDDEGGPRTLGGDGHRAEEASKDKE
GTCAAGAGCGCCACCTTGTCCTCCAAGGAGAGCACGGCGTCTGGAATGCAGGATGAGGTCAGAGCGGTTGGCGAGGAGCAAAGGTCAGAGGAGCCAAAGCGCAGGGTGGATACTTCAGTGTCTTGGGAGGCGTTGATTTGTGTCGGATCGTCCAAGAAGAGAGCGAGTAAGGCATCCTCTTCAGATGATGAAGGAGGGCCAAGAACACTGGGAGGGGATGGCCACAGAGCGGAGGAGGCTAGCAAAGACAAAGAAG	GTCAAGAGCGCCACCTTGTCCTCCAAGGAGAGCACGGCGTCTGGAATGCAGGATGAGGTCAGAGCGGTTGGCGAGGAGCAAAGGTCAGAGGAGCCAAAGCGCAGGGTGGATACTTCAGTGTCTTGGGAGGCGTTGATTTGTGTCGGATCGTCCAAGAAGAGAGCGAGTAAGGCATCCTCTTCAGATGATGAAGGAGGGCCAAGAACACTGGGAGGGGATGGCCACAGAGCGGAGGAGGCTAGCAAAGACAAAGAAG	1	3 Base Changes	VKSATLSSKESTASGMQDEVRAVGEEQRSEEPKRRVDTSVSWEALICVGSSKKRASKASSSDDEGGPRTLGGDGHRAEEASKDKE	VKSATLSSTESTASGMQDEVRAVGEEQRSEEPKRRVDTSVSWEALICVGSSKKRARKASSSDDEGGPRTLGGDGHRAEEASKDKE
GTCAAGAGCGCCACCTTGTCCTCCACAGAGAGCACGGCGTCTGGAATGCAGGATGAGGTCAGAGCGGTTGGCGAGGAGCAAAGGTCAGAGGAGCCAAAGCGCAGGGTGGATACTTCAGTGTCTTGGGAGGCGTTGATTTGTGTCGGATCGTCCAAGAAGAGAGCGAGGAAGGCATCCTCTTCAGATGATGAAGGAGGGCCAAGAACACTGGGAGGGGATGGCCACAGAGCGGAGGAGGCTAGCAAAGACAAAGAAG	GTCAAGAGCGCCACCTTGTCCTCCACAGAGAGCACGGCGTCTGGAATGCAGGATGAGGTCAGAGCGGTTGGCGAGGAGCAAAGGTCAGAGGAGCCAAAGCGCAGGGTGGATACTTCAGTGTCTTGGGAGGCGTTGATTTGTGTCGGATCGTCCAAGAAGAGAGCGAGGAAGGCATCCTCTTCAGATGATGAAGGAGGGCCAAGAACACTGGGAGGGGATGGCCACAGAGCGGAGGAGGCTAGCAAAGACAAAGAAG	1	2 Base Changes	VKSATLSSTESTASGMQDEVRAVGEEQRSEEPKRRVDTSVSWEALICVGSSKKRARKASSSDDEGGPRTLGGDGHRAEEASKDKE	VKSATLSSTESTASGMQDEVRAVGEEQRSEEPKRRVDTSVSWEALICVGSSKKRARKASSSDDEGGPRTLGGDGHRAEEASKDKE
GTCAAGAGCGCCACCTTGTCCTCCACGGAGAGCACGGCGTCTGGAACGCAGGATGAGGTCAGAGCGGTTGGCGAGGAGCAAAGGTCAGAGGAGCCAAAGCGCAGGGTGGATACTTCAGTGTCTTGGGAGGCGTTGATTTGTGTCGGATCGTCCAAGAAGAGAGCGAGGAAGGCATCCTCTTCAGATGATGAAGGAGGGCCAAGAACACTGGGAGGGGATGGCCACAGAGCGGAGGAGGCTAGCAAAGACAAAGAAG	GTCAAGAGCGCCACCTTGTCCTCCACGGAGAGCACGGCGTCTGGAACGCAGGATGAGGTCAGAGCGGTTGGCGAGGAGCAAAGGTCAGAGGAGCCAAAGCGCAGGGTGGATACTTCAGTGTCTTGGGAGGCGTTGATTTGTGTCGGATCGTCCAAGAAGAGAGCGAGGAAGGCATCCTCTTCAGATGATGAAGGAGGGCCAAGAACACTGGGAGGGGATGGCCACAGAGCGGAGGAGGCTAGCAAAGACAAAGAAG	1	2 Base Changes	VKSATLSSTESTASGTQDEVRAVGEEQRSEEPKRRVDTSVSWEALICVGSSKKRARKASSSDDEGGPRTLGGDGHRAEEASKDKE	VKSATLSSTESTASGMQDEVRAVGEEQRSEEPKRRVDTSVSWEALICVGSSKKRARKASSSDDEGGPRTLGGDGHRAEEASKDKE
GTCAAGAGCGCCACCTTGTCCTCCACGGAGAGCACGGCGTCTGGAATGCAGGATGAGGCCAGAGCGGTTGGCGAGGAGCAAAGGTCAGAGGAGCCAAAGCGCAGGGTGGATACTTCAGTGTCTTGGGAGGCGTTGATTTGTGTCGGATCGTCCAAGAAGAGAGCGAGGAAGGCATCCTCTTCAGATGATGAAGGAGGGCCAAGAACACTGGGAGGGGATGGCCACAGAGCGGAGGAGGCTAGCAAAGACAAAGAAG	GTCAAGAGCGCCACCTTGTCCTCCACGGAGAGCACGGCGTCTGGAATGCAGGATGAGGCCAGAGCGGTTGGCGAGGAGCAAAGGTCAGAGGAGCCAAAGCGCAGGGTGGATACTTCAGTGTCTTGGGAGGCGTTGATTTGTGTCGGATCGTCCAAGAAGAGAGCGAGGAAGGCATCCTCTTCAGATGATGAAGGAGGGCCAAGAACACTGGGAGGGGATGGCCACAGAGCGGAGGAGGCTAGCAAAGACAAAGAAG	1	2 Base Changes	VKSATLSSTESTASGMQDEARAVGEEQRSEEPKRRVDTSVSWEALICVGSSKKRARKASSSDDEGGPRTLGGDGHRAEEASKDKE	VKSATLSSTESTASGMQDEVRAVGEEQRSEEPKRRVDTSVSWEALICVGSSKKRARKASSSDDEGGPRTLGGDGHRAEEASKDKE
GTCAAGAGCGCCACCTTGTCCTCCACGGAGAGCACGGCGTCTGGAATGCAGGATGAGGTCAGAACGGTTGGCGAGGAGCAAAGGTCAGAGGAGCCAAAGCGCAGGGTGGATACTTCAGTGTCTTGGGAGGCGTTGATTTGTGTCGGATCGTCCAAGAAGAGAGCGAGGAAGGCATCCTCTTCAGATGATGAAGGAGGGCCAAGAACACTGGGAGGGGATGGCCACAGAGCGGAGGAGGCTAGCAAAGACAAAGAAG	GTCAAGAGCGCCACCTTGTCCTCCACGGAGAGCACGGCGTCTGGAATGCAGGATGAGGTCAGAACGGTTGGCGAGGAGCAAAGGTCAGAGGAGCCAAAGCGCAGGGTGGATACTTCAGTGTCTTGGGAGGCGTTGATTTGTGTCGGATCGTCCAAGAAGAGAGCGAGGAAGGCATCCTCTTCAGATGATGAAGGAGGGCCAAGAACACTGGGAGGGGATGGCCACAGAGCGGAGGAGGCTAGCAAAGACAAAGAAG	1	2 Base Changes	VKSATLSSTESTASGMQDEVRTVGEEQRSEEPKRRVDTSVSWEALICVGSSKKRARKASSSDDEGGPRTLGGDGHRAEEASKDKE	VKSATLSSTESTASGMQDEVRAVGEEQRSEEPKRRVDTSVSWEALICVGSSKKRARKASSSDDEGGPRTLGGDGHRAEEASKDKE
GTCAAGAGCGCCACCTTGTCCTCCACGGAGAGCACGGCGTCTGGAATGCAGGATGAGGTCAGAGCGGTTGGCGAGGAGCAAACGTCAGAGGAGCCAAAGCGCAGGGTGGATACTCCAGTGTCTTGGGAGGCGTTGATTTGTGTCGGATCGTCCAAGAAGAGAGCGAGGAAGGCATCCTCTTCAGATGATGAAGGAGGGCCAAGAACACTGGGAGGGGATGGCCACAGAGCGGAGGAGGCTAGCAAAGACAAAGAAG	GTCAAGAGCGCCACCTTGTCCTCCACGGAGAGCACGGCGTCTGGAATGCAGGATGAGGTCAGAGCGGTTGGCGAGGAGCAAACGTCAGAGGAGCCAAAGCGCAGGGTGGATACTCCAGTGTCTTGGGAGGCGTTGATTTGTGTCGGATCGTCCAAGAAGAGAGCGAGGAAGGCATCCTCTTCAGATGATGAAGGAGGGCCAAGAACACTGGGAGGGGATGGCCACAGAGCGGAGGAGGCTAGCAAAGACAAAGAAG	1	3 Base Changes	VKSATLSSTESTASGMQDEVRAVGEEQTSEEPKRRVDTPVSWEALICVGSSKKRARKASSSDDEGGPRTLGGDGHRAEEASKDKE	VKSATLSSTESTASGMQDEVRAVGEEQRSEEPKRRVDTSVSWEALICVGSSKKRARKASSSDDEGGPRTLGGDGHRAEEASKDKE
GTCAAGAGCGCCACCTTGTCCTCCACGGAGAGCACGGCGTCTGGAATGCAGGATGAGGTCAGAGCGGTTGGCGAGGAGCAAAGGTCAGAGGAGCCAAAGCGCAGGGCGGATACTTCAGTGTCTTGGGAGGCGTTGATTTGTGTCGGATCGTCCAAGAAGAGAGCGAGGAAGGCATCCTCTTCAGATGATGAAGGAGGGCCAAGAACACTGGGAGGGGATGGCCACAGAGCGGAGGAGGCTAGCAAAGACAAAGAAG	GTCAAGAGCGCCACCTTGTCCTCCACGGAGAGCACGGCGTCTGGAATGCAGGATGAGGTCAGAGCGGTTGGCGAGGAGCAAAGGTCAGAGGAGCCAAAGCGCAGGGCGGATACTTCAGTGTCTTGGGAGGCGTTGATTTGTGTCGGATCGTCCAAGAAGAGAGCGAGGAAGGCATCCTCTTCAGATGATGAAGGAGGGCCAAGAACACTGGGAGGGGATGGCCACAGAGCGGAGGAGGCTAGCAAAGACAAAGAAG	1	2 Base Changes	VKSATLSSTESTASGMQDEVRAVGEEQRSEEPKRRADTSVSWEALICVGSSKKRARKASSSDDEGGPRTLGGDGHRAEEASKDKE	VKSATLSSTESTASGMQDEVRAVGEEQRSEEPKRRVDTSVSWEALICVGSSKKRARKASSSDDEGGPRTLGGDGHRAEEASKDKE
GTCAAGAGCGCCACCTTGTCCTCCACGGAGAGCACGGCGTCTGGAATGCAGGATGAGGTCAGAGCGGTTGGCGAGGAGCAAAGGTCAGAGGAGCCAAAGCGCAGGGTAGATACTTCAGTGTCTTGGGAGGCGTTGATTTGTGTCGGATCGTCCAAGAAGAGAGCGAGGAAGGCATCCTCTTCAGATGATGAAGGAGGGCCAAGAACACTGGGAGGGGATGGCCACAGAGCGGAGGAGGCTAGCAAAGACAAAGAAG	GTCAAGAGCGCCACCTTGTCCTCCACGGAGAGCACGGCGTCTGGAATGCAGGATGAGGTCAGAGCGGTTGGCGAGGAGCAAAGGTCAGAGGAGCCAAAGCGCAGGGTAGATACTTCAGTGTCTTGGGAGGCGTTGATTTGTGTCGGATCGTCCAAGAAGAGAGCGAGGAAGGCATCCTCTTCAGATGATGAAGGAGGGCCAAGAACACTGGGAGGGGATGGCCACAGAGCGGAGGAGGCTAGCAAAGACAAAGAAG	1	2 Base Changes	VKSATLSSTESTASGMQDEVRAVGEEQRSEEPKRRVDTSVSWEALICVGSSKKRARKASSSDDEGGPRTLGGDGHRAEEASKDKE	VKSATLSSTESTASGMQDEVRAVGEEQRSEEPKRRVDTSVSWEALICVGSSKKRARKASSSDDEGGPRTLGGDGHRAEEASKDKE
GTCAAGAGCGCCACCTTGTCCTCCACGGAGAGCACGGCGTCTGGAATGCAGGATGAGGTCAGAGCGGTTGGCGAGGAGCAAAGGTCAGAGGAGCCAAAGCGCAGGGTGGACACTTCAGTGTCTTGGGAGGCGTTGATTTGTGTCGGATCGTCCAAGAAGAGAGCGAGGAAGGCATCCTCTTCAGATGATGAAGGAGGGCCAAGAACACTGGGAGGGGATGGCCACAGAGCGGAGGAGGCTAGCAAAGACAAAGAAG	GTCAAGAGCGCCACCTTGTCCTCCACGGAGAGCACGGCGTCTGGAATGCAGGATGAGGTCAGAGCGGTTGGCGAGGAGCAAAGGTCAGAGGAGCCAAAGCGCAGGGTGGACACTTCAGTGTCTTGGGAGGCGTTGATTTGTGTCGGATCGTCCAAGAAGAGAGCGAGGAAGGCATCCTCTTCAGATGATGAAGGAGGGCCAAGAACACTGGGAGGGGATGGCCACAGAGCGGAGGAGGCTAGCAAAGACAAAGAAG	1	2 Base Changes	VKSATLSSTESTASGMQDEVRAVGEEQRSEEPKRRVDTSVSWEALICVGSSKKRARKASSSDDEGGPRTLGGDGHRAEEASKDKE	VKSATLSSTESTASGMQDEVRAVGEEQRSEEPKRRVDTSVSWEALICVGSSKKRARKASSSDDEGGPRTLGGDGHRAEEASKDKE
GTCAAGAGCGCCACCTTGTCCTCCACGGAGAGCACGGCGTCTGGAATGCAGGATGAGGTCAGAGCGGTTGGCGAGGAGCAAAGGTCAGAGGAGCCAAAGCGCAGGGTGGATACTCCAGTGTCTTGGGAGGCGTTGATTTGTGTCGGATCGTCCAAGAAGAGAGCGAGGAAGGCATCCTCTTCAGATGATGAAGGAGGGCCAAGAACACTGGGAGGGGATGGCCACAGAGCGGAGGAGGCTAGCAAAGACAAAGAAG	GTCAAGAGCGCCACCTTGTCCTCCACGGAGAGCACGGCGTCTGGAATGCAGGATGAGGTCAGAGCGGTTGGCGAGGAGCAAAGGTCAGAGGAGCCAAAGCGCAGGGTGGATACTCCAGTGTCTTGGGAGGCGTTGATTTGTGTCGGATCGTCCAAGAAGAGAGCGAGGAAGGCATCCTCTTCAGATGATGAAGGAGGGCCAAGAACACTGGGAGGGGATGGCCACAGAGCGGAGGAGGCTAGCAAAGACAAAGAAG	1	2 Base Changes	VKSATLSSTESTASGMQDEVRAVGEEQRSEEPKRRVDTPVSWEALICVGSSKKRARKASSSDDEGGPRTLGGDGHRAEEASKDKE	VKSATLSSTESTASGMQDEVRAVGEEQRSEEPKRRVDTSVSWEALICVGSSKKRARKASSSDDEGGPRTLGGDGHRAEEASKDKE
GTCAAGAGCGCCACCTTGTCCTCCACGGAGAGCACGGCGTCTGGAATGCAGGATGAGGTCAGAGCGGTTGGCGAGGAGCAAAGGTCAGAGGAGCCAAAGCGCAGGGTGGATACTTCAGCGTCTTGGGAGGCGTTGATTTGTGTCGGATCGTCCAAGAAGAGAGCGTGGAAGGCATCCTCTTCAGATGATGAAGGAGGGCCAAGAACACTGGGAGGGGATGGCCACAGAGCGGAGGAGGCTAGCAAAGACAAAGAAG	GTCAAGAGCGCCACCTTGTCCTCCACGGAGAGCACGGCGTCTGGAATGCAGGATGAGGTCAGAGCGGTTGGCGAGGAGCAAAGGTCAGAGGAGCCAAAGCGCAGGGTGGATACTTCAGCGTCTTGGGAGGCGTTGATTTGTGTCGGATCGTCCAAGAAGAGAGCGTGGAAGGCATCCTCTTCAGATGATGAAGGAGGGCCAAGAACACTGGGAGGGGATGGCCACAGAGCGGAGGAGGCTAGCAAAGACAAAGAAG	1	3 Base Changes	VKSATLSSTESTASGMQDEVRAVGEEQRSEEPKRRVDTSASWEALICVGSSKKRAWKASSSDDEGGPRTLGGDGHRAEEASKDKE	VKSATLSSTESTASGMQDEVRAVGEEQRSEEPKRRVDTSVSWEALICVGSSKKRARKASSSDDEGGPRTLGGDGHRAEEASKDKE
GTCAAGAGCGCCACCTTGTCCTCCACGGAGAGCACGGCGTCTGGAATGCAGGATGAGGTCAGAGCGGTTGGCGAGGAGCAAAGGTCAGAGGAGCCAAAGCGCAGGGTGGATACTTCAGTGTCCTGGGAGGCGTTGATTTGTGTCGGATCGTCCAAGAAGAGAGCGAGGAAGGCATCCTCTTCAGATGATGAAGGAGGGCCAAGAACACTGGGAGGGGATGGCCACAGAGCGGAGGAGGCTAGCAAAGACAAAGAAG	GTCAAGAGCGCCACCTTGTCCTCCACGGAGAGCACGGCGTCTGGAATGCAGGATGAGGTCAGAGCGGTTGGCGAGGAGCAAAGGTCAGAGGAGCCAAAGCGCAGGGTGGATACTTCAGTGTCCTGGGAGGCGTTGATTTGTGTCGGATCGTCCAAGAAGAGAGCGAGGAAGGCATCCTCTTCAGATGATGAAGGAGGGCCAAGAACACTGGGAGGGGATGGCCACAGAGCGGAGGAGGCTAGCAAAGACAAAGAAG	1	2 Base Changes	VKSATLSSTESTASGMQDEVRAVGEEQRSEEPKRRVDTSVSWEALICVGSSKKRARKASSSDDEGGPRTLGGDGHRAEEASKDKE	VKSATLSSTESTASGMQDEVRAVGEEQRSEEPKRRVDTSVSWEALICVGSSKKRARKASSSDDEGGPRTLGGDGHRAEEASKDKE
GTCAAGAGCGCCACCTTGTCCTCCACGGAGAGCACGGCGTCTGGAATGCAGGATGAGGTCAGAGCGGTTGGCGAGGAGCAAAGGTCAGAGGAGCCAAAGCGCAGGGTGGATACTTCAGTGTCTTGGGAGGCGTCGATTTGTGTCGGATCGTCCAAGAAGAGAGCGAGGAAGGCATCCTCTTCAGATGATGAAGGAGGGCCAAGAACACTGGGAGGGGATGGCCACAGAGCGGAGGAGGCTAGCAAAGACAAAGAAG	GTCAAGAGCGCCACCTTGTCCTCCACGGAGAGCACGGCGTCTGGAATGCAGGATGAGGTCAGAGCGGTTGGCGAGGAGCAAAGGTCAGAGGAGCCAAAGCGCAGGGTGGATACTTCAGTGTCTTGGGAGGCGTCGATTTGTGTCGGATCGTCCAAGAAGAGAGCGAGGAAGGCATCCTCTTCAGATGATGAAGGAGGGCCAAGAACACTGGGAGGGGATGGCCACAGAGCGGAGGAGGCTAGCAAAGACAAAGAAG	1	2 Base Changes	VKSATLSSTESTASGMQDEVRAVGEEQRSEEPKRRVDTSVSWEASICVGSSKKRARKASSSDDEGGPRTLGGDGHRAEEASKDKE	VKSATLSSTESTASGMQDEVRAVGEEQRSEEPKRRVDTSVSWEALICVGSSKKRARKASSSDDEGGPRTLGGDGHRAEEASKDKE
GTCAAGAGCGCCACCTTGTCCTCCACGGAGAGCACGGCGTCTGGAATGCAGGATGAGGTCAGAGCGGTTGGCGAGGAGCAAAGGTCAGAGGAGCCAAAGCGCAGGGTGGATACTTCAGTGTCTTGGGAGGCGTTGATATGTGTCGGATCGTCCAAGAAGAGAGCGAGGAAGGCATCCTCTTCAGATGATGAAGGAGGGCCAAGAACACTGGGAGGGGATGGCCACAGAGCGGAGGAGGCTAGCAAAGACAAAGAAG	GTCAAGAGCGCCACCTTGTCCTCCACGGAGAGCACGGCGTCTGGAATGCAGGATGAGGTCAGAGCGGTTGGCGAGGAGCAAAGGTCAGAGGAGCCAAAGCGCAGGGTGGATACTTCAGTGTCTTGGGAGGCGTTGATATGTGTCGGATCGTCCAAGAAGAGAGCGAGGAAGGCATCCTCTTCAGATGATGAAGGAGGGCCAAGAACACTGGGAGGGGATGGCCACAGAGCGGAGGAGGCTAGCAAAGACAAAGAAG	1	2 Base Changes	VKSATLSSTESTASGMQDEVRAVGEEQRSEEPKRRVDTSVSWEALICVGSSKKRARKASSSDDEGGPRTLGGDGHRAEEASKDKE	VKSATLSSTESTASGMQDEVRAVGEEQRSEEPKRRVDTSVSWEALICVGSSKKRARKASSSDDEGGPRTLGGDGHRAEEASKDKE
GTCAAGAGCGCCACCTTGTCCTCCACGGAGAGCACGGCGTCTGGAATGCAGGATGAGGTCAGAGCGGTTGGCGAGGAGCAAAGGTCAGAGGAGCCAAAGCGCAGGGTGGATACTTCAGTGTCTTGGGAGGCGTTGATCTGTGTCGGATCGTCCAAGAAGAGAGCGAGGAGGGCATCCTCTTCAGATGATGAAGGAGGGCCAAGAACACTGGGAGGGGATGGCCACAGAGCGGAGGAGGCTAGCAAAGACAAAGAAG	GTCAAGAGCGCCACCTTGTCCTCCACGGAGAGCACGGCGTCTGGAATGCAGGATGAGGTCAGAGCGGTTGGCGAGGAGCAAAGGTCAGAGGAGCCAAAGCGCAGGGTGGATACTTCAGTGTCTTGGGAGGCGTTGATCTGTGTCGGATCGTCCAAGAAGAGAGCGAGGAGGGCATCCTCTTCAGATGATGAAGGAGGGCCAAGAACACTGGGAGGGGATGGCCACAGAGCGGAGGAGGCTAGCAAAGACAAAGAAG	1	3 Base Changes	VKSATLSSTESTASGMQDEVRAVGEEQRSEEPKRRVDTSVSWEALICVGSSKKRARRASSSDDEGGPRTLGGDGHRAEEASKDKE	VKSATLSSTESTASGMQDEVRAVGEEQRSEEPKRRVDTSVSWEALICVGSSKKRARKASSSDDEGGPRTLGGDGHRAEEASKDKE
GTCAAGAGCGCCACCTTGTCCTCCACGGAGAGCACGGCGTCTGGAATGCAGGATGAGGTCAGAGCGGTTGGCGAGGAGCAAAGGTCAGAGGAGCCAAAGCGCAGGGTGGATACTTCAGTGTCTTGGGAGGCGTTGATTTGCGTCGGATCGTCCAAGAAGAGAGCGAGGAAGGCATCCTCTTCAGATGATGAAGGAGGGCCAAGAACACTGGGAGGGGATGGCCACAGAGCGGAGGAGGCTAGCAAAGACAAAGAAG	GTCAAGAGCGCCACCTTGTCCTCCACGGAGAGCACGGCGTCTGGAATGCAGGATGAGGTCAGAGCGGTTGGCGAGGAGCAAAGGTCAGAGGAGCCAAAGCGCAGGGTGGATACTTCAGTGTCTTGGGAGGCGTTGATTTGCGTCGGATCGTCCAAGAAGAGAGCGAGGAAGGCATCCTCTTCAGATGATGAAGGAGGGCCAAGAACACTGGGAGGGGATGGCCACAGAGCGGAGGAGGCTAGCAAAGACAAAGAAG	1	2 Base Changes	VKSATLSSTESTASGMQDEVRAVGEEQRSEEPKRRVDTSVSWEALICVGSSKKRARKASSSDDEGGPRTLGGDGHRAEEASKDKE	VKSATLSSTESTASGMQDEVRAVGEEQRSEEPKRRVDTSVSWEALICVGSSKKRARKASSSDDEGGPRTLGGDGHRAEEASKDKE
GTCAAGAGCGCCACCTTGTCCTCCACGGAGAGCACGGCGTCTGGAATGCAGGATGAGGTCAGAGCGGTTGGCGAGGAGCAAAGGTCAGAGGAGCCAAAGCGCAGGGTGGATACTTCAGTGTCTTGGGAGGCGTTGATTTGTGTCGAATCGTCCAAGAAGAGAGCGAGGAAGGCATCCTCTTCAGATGATGAAGGAGGGCCAAGAACACTGGGAGGGGATGGCCACAGAGCGGAGGAGGCTAGCAAAGACAAAGAAG	GTCAAGAGCGCCACCTTGTCCTCCACGGAGAGCACGGCGTCTGGAATGCAGGATGAGGTCAGAGCGGTTGGCGAGGAGCAAAGGTCAGAGGAGCCAAAGCGCAGGGTGGATACTTCAGTGTCTTGGGAGGCGTTGATTTGTGTCGAATCGTCCAAGAAGAGAGCGAGGAAGGCATCCTCTTCAGATGATGAAGGAGGGCCAAGAACACTGGGAGGGGATGGCCACAGAGCGGAGGAGGCTAGCAAAGACAAAGAAG	1	2 Base Changes	VKSATLSSTESTASGMQDEVRAVGEEQRSEEPKRRVDTSVSWEALICVESSKKRARKASSSDDEGGPRTLGGDGHRAEEASKDKE	VKSATLSSTESTASGMQDEVRAVGEEQRSEEPKRRVDTSVSWEALICVGSSKKRARKASSSDDEGGPRTLGGDGHRAEEASKDKE
GTCAAGAGCGCCACCTTGTCCTCCACGGAGAGCACGGCGTCTGGAATGCAGGATGAGGTCAGAGCGGTTGGCGAGGAGCAAAGGTCAGAGGAGCCAAAGCGCAGGGTGGATACTTCAGTGTCTTGGGAGGCGTTGATTTGTGTCGGACCGTCCAAGAAGAGAGCGAGGAAGGCATCCTCTTCAGATGATGAAGGAGGGCCAAGAACACTGGGAGGGGATGGCCACAGAGCGGAGGAGGCTAGCAAAGACAAAGAAG	GTCAAGAGCGCCACCTTGTCCTCCACGGAGAGCACGGCGTCTGGAATGCAGGATGAGGTCAGAGCGGTTGGCGAGGAGCAAAGGTCAGAGGAGCCAAAGCGCAGGGTGGATACTTCAGTGTCTTGGGAGGCGTTGATTTGTGTCGGACCGTCCAAGAAGAGAGCGAGGAAGGCATCCTCTTCAGATGATGAAGGAGGGCCAAGAACACTGGGAGGGGATGGCCACAGAGCGGAGGAGGCTAGCAAAGACAAAGAAG	1	2 Base Changes	VKSATLSSTESTASGMQDEVRAVGEEQRSEEPKRRVDTSVSWEALICVGPSKKRARKASSSDDEGGPRTLGGDGHRAEEASKDKE	VKSATLSSTESTASGMQDEVRAVGEEQRSEEPKRRVDTSVSWEALICVGSSKKRARKASSSDDEGGPRTLGGDGHRAEEASKDKE
GTCAAGAGCGCCACCTTGTCCTCCACGGAGAGCACGGCGTCTGGAATGCAGGATGAGGTCAGAGCGGTTGGCGAGGAGCAAAGGTCAGAGGAGCCAAAGCGCAGGGTGGATACTTCAGTGTCTTGGGAGGCGTTGATTTGTGTCGGATCGTCCAAGAAGAGAGCGAGGAAGGCACCCTCTTCAGATGATGAAGGAGGGCCAAGAACACTGGGAGGGGATGGCTACAGAGCGGAGGAGGCTAGCAAAGACAAAGAAG	GTCAAGAGCGCCACCTTGTCCTCCACGGAGAGCACGGCGTCTGGAATGCAGGATGAGGTCAGAGCGGTTGGCGAGGAGCAAAGGTCAGAGGAGCCAAAGCGCAGGGTGGATACTTCAGTGTCTTGGGAGGCGTTGATTTGTGTCGGATCGTCCAAGAAGAGAGCGAGGAAGGCACCCTCTTCAGATGATGAAGGAGGGCCAAGAACACTGGGAGGGGATGGCTACAGAGCGGAGGAGGCTAGCAAAGACAAAGAAG	1	3 Base Changes	VKSATLSSTESTASGMQDEVRAVGEEQRSEEPKRRVDTSVSWEALICVGSSKKRARKAPSSDDEGGPRTLGGDGYRAEEASKDKE	VKSATLSSTESTASGMQDEVRAVGEEQRSEEPKRRVDTSVSWEALICVGSSKKRARKASSSDDEGGPRTLGGDGHRAEEASKDKE
GTCAAGAGCGCCACCTTGTCCTCCACGGAGAGCACGGCGTCTGGAATGCAGGATGAGGTCAGAGCGGTTGGCGAGGAGCAAAGGTCAGAGGAGCCAAAGCGCAGGGTGGATACTTCAGTGTCTTGGGAGGCGTTGATTTGTGTCGGATCGTCCAAGAAGAGAGCGAGGAAGGCATCCTCTTCAGATAATGAAGGAGGGCCAAGAACACTGGGAGGGGATGGCCACAGAGCGGAGGAGGCTAGCAAAGACAAAGAAG	GTCAAGAGCGCCACCTTGTCCTCCACGGAGAGCACGGCGTCTGGAATGCAGGATGAGGTCAGAGCGGTTGGCGAGGAGCAAAGGTCAGAGGAGCCAAAGCGCAGGGTGGATACTTCAGTGTCTTGGGAGGCGTTGATTTGTGTCGGATCGTCCAAGAAGAGAGCGAGGAAGGCATCCTCTTCAGATAATGAAGGAGGGCCAAGAACACTGGGAGGGGATGGCCACAGAGCGGAGGAGGCTAGCAAAGACAAAGAAG	1	2 Base Changes	VKSATLSSTESTASGMQDEVRAVGEEQRSEEPKRRVDTSVSWEALICVGSSKKRARKASSSDNEGGPRTLGGDGHRAEEASKDKE	VKSATLSSTESTASGMQDEVRAVGEEQRSEEPKRRVDTSVSWEALICVGSSKKRARKASSSDDEGGPRTLGGDGHRAEEASKDKE
GTCAAGAGCGCCACCTTGTCCTCCACGGAGAGCACGGCGTCTGGAATGCAGGATGAGGTCAGAGCGGTTGGCGAGGAGCAAAGGTCAGAGGAGCCAAAGCGCAGGGTGGATACTTCAGTGTCTTGGGAGGCGTTGATTTGTGTCGGATCGTCCAAGAAGAGAGCGAGGAAGGCATCCTCTTCAGATGATGAAGGAGGGCCAAGAACACTGGGAGGGGATGGCCACAGAGCGGAGGAAGCTAGCAAAGACAAAGAAG	GTCAAGAGCGCCACCTTGTCCTCCACGGAGAGCACGGCGTCTGGAATGCAGGATGAGGTCAGAGCGGTTGGCGAGGAGCAAAGGTCAGAGGAGCCAAAGCGCAGGGTGGATACTTCAGTGTCTTGGGAGGCGTTGATTTGTGTCGGATCGTCCAAGAAGAGAGCGAGGAAGGCATCCTCTTCAGATGATGAAGGAGGGCCAAGAACACTGGGAGGGGATGGCCACAGAGCGGAGGAAGCTAGCAAAGACAAAGAAG	1	2 Base Changes	VKSATLSSTESTASGMQDEVRAVGEEQRSEEPKRRVDTSVSWEALICVGSSKKRARKASSSDDEGGPRTLGGDGHRAEEASKDKE	VKSATLSSTESTASGMQDEVRAVGEEQRSEEPKRRVDTSVSWEALICVGSSKKRARKASSSDDEGGPRTLGGDGHRAEEASKDKE
GTCAAGAGCGCCACCTTGTCCTCCACGGAGAGCACGGCGTCTGGAATGCAGGATGAGGTCAGAGCGGTTGGCGAGGAGCAAAGGTCAGAGGAGCCAAAGCGCAGGGTGGATACTTCAGTGTCTTGGGAGGCGTTGATTTGTGTCGGATCGTCCAAGAAGAGAGCGAGGAAGGCATCCTCTTCAGATGATGAAGGAGGGCCAAGAACACTGGGAGGGGATGGCCACAGAGCGGAGGAGACTAGCAAAGACAAAGAAG	GTCAAGAGCGCCACCTTGTCCTCCACGGAGAGCACGGCGTCTGGAATGCAGGATGAGGTCAGAGCGGTTGGCGAGGAGCAAAGGTCAGAGGAGCCAAAGCGCAGGGTGGATACTTCAGTGTCTTGGGAGGCGTTGATTTGTGTCGGATCGTCCAAGAAGAGAGCGAGGAAGGCATCCTCTTCAGATGATGAAGGAGGGCCAAGAACACTGGGAGGGGATGGCCACAGAGCGGAGGAGACTAGCAAAGACAAAGAAG	1	2 Base Changes	VKSATLSSTESTASGMQDEVRAVGEEQRSEEPKRRVDTSVSWEALICVGSSKKRARKASSSDDEGGPRTLGGDGHRAEETSKDKE	VKSATLSSTESTASGMQDEVRAVGEEQRSEEPKRRVDTSVSWEALICVGSSKKRARKASSSDDEGGPRTLGGDGHRAEEASKDKE
GTCAAGAGCGCCACCTTGTCCTCCACGGAGAGCACGGCGTCTGGAATGCAGGATGAGGTCAGAGCGGTTGGCGAGGAGCAAAGGTCAGAGGAGCCAAAGCGCAGGGTGGATACTTCAGTGTCTTGGGAGGCGTTGATTTGTGTCGGATCGTCCAAGAAGAGAGCGAGGAAGGCATCCTCTTCAGATGATGAAGGAGGGCCAAGAACACTGGGAGGGGATGGCCACAGAGCGGAGGAGGCTAGCAGAGACAAAGAAG	GTCAAGAGCGCCACCTTGTCCTCCACGGAGAGCACGGCGTCTGGAATGCAGGATGAGGTCAGAGCGGTTGGCGAGGAGCAAAGGTCAGAGGAGCCAAAGCGCAGGGTGGATACTTCAGTGTCTTGGGAGGCGTTGATTTGTGTCGGATCGTCCAAGAAGAGAGCGAGGAAGGCATCCTCTTCAGATGATGAAGGAGGGCCAAGAACACTGGGAGGGGATGGCCACAGAGCGGAGGAGGCTAGCAGAGACAAAGAAG	1	2 Base Changes	VKSATLSSTESTASGMQDEVRAVGEEQRSEEPKRRVDTSVSWEALICVGSSKKRARKASSSDDEGGPRTLGGDGHRAEEASRDKE	VKSATLSSTESTASGMQDEVRAVGEEQRSEEPKRRVDTSVSWEALICVGSSKKRARKASSSDDEGGPRTLGGDGHRAEEASKDKE
GTCAAGAGCGCCACCTTGTCCTCCACGGAGAGCACGGCGTCTGGAATGCAGGATGAGGTCAGAGCGGTTGGCGAGGAGCAAAGGTCAGAGGAGCCAAAGCGCAGGGTGGATACTTCAGTGTCTTGGGAGGCGTTGATTTGTGTCGGATCGTCCAAGAAGAGAGCGAGGAAGGCATCCTCTTCAGATGATGAAGGAGGGCCAAGAACACTGGGAGGGGATGGCCGCAGAGCGGAGGAGGCTAGCAAAGACAAAGAAG	GTCAAGAGCGCCACCTTGTCCTCCACGGAGAGCACGGCGTCTGGAATGCAGGATGAGGTCAGAGCGGTTGGCGAGGAGCAAAGGTCAGAGGAGCCAAAGCGCAGGGTGGATACTTCAGTGTCTTGGGAGGCGTTGATTTGTGTCGGATCGTCCAAGAAGAGAGCGAGGAAGGCATCCTCTTCAGATGATGAAGGAGGGCCAAGAACACTGGGAGGGGATGGCCGCAGAGCGGAGGAGGCTAGCAAAGACAAAGAAG	1	2 Base Changes	VKSATLSSTESTASGMQDEVRAVGEEQRSEEPKRRVDTSVSWEALICVGSSKKRARKASSSDDEGGPRTLGGDGRRAEEASKDKE	VKSATLSSTESTASGMQDEVRAVGEEQRSEEPKRRVDTSVSWEALICVGSSKKRARKASSSDDEGGPRTLGGDGHRAEEASKDKE
GTCAAGAGCGCCACCTTGTCCTCCACGGAGAGCACGGCGTCTGGAATGCAGGATGAGGTCAGAGCGGTTGGCGAGGAGCAAAGGTCAGAGGAGCCAAAGCGCAGGGTGGATACTTCAGTGTCTTGGGAGGCGTTGATTTGTGTCGGATCGTCCAAGAAGAGAGCGAGGAAGGCATCCTCTTCAGATGATGAAGGAGGGCCAAGAACACTGGGAGGGGCTGGCCACAGAGCGGAGGAGGCTAGCAAAGACAAAGAAG	GTCAAGAGCGCCACCTTGTCCTCCACGGAGAGCACGGCGTCTGGAATGCAGGATGAGGTCAGAGCGGTTGGCGAGGAGCAAAGGTCAGAGGAGCCAAAGCGCAGGGTGGATACTTCAGTGTCTTGGGAGGCGTTGATTTGTGTCGGATCGTCCAAGAAGAGAGCGAGGAAGGCATCCTCTTCAGATGATGAAGGAGGGCCAAGAACACTGGGAGGGGCTGGCCACAGAGCGGAGGAGGCTAGCAAAGACAAAGAAG	1	2 Base Changes	VKSATLSSTESTASGMQDEVRAVGEEQRSEEPKRRVDTSVSWEALICVGSSKKRARKASSSDDEGGPRTLGGAGHRAEEASKDKE	VKSATLSSTESTASGMQDEVRAVGEEQRSEEPKRRVDTSVSWEALICVGSSKKRARKASSSDDEGGPRTLGGDGHRAEEASKDKE
GTCAAGAGCGCCACCTTGTCCTCCACGGAGAGCACGGCGTCTGGAATGCAGGATGAGGTCAGAGCGGTTGGCGAGGAGCAAAGGTCAGAGGAGCCAAAGCGCAGGGTGGATACTTCAGTGTCTTGGGAGGCGTTGATTTGTGTCGGATCGTCCAAGAAGAGAGCGAGGAAGGCATCCTCTTCAGATGATGAAGGAGGGCCAAGAACACTGGGGGGGGATGGCCACAGAGCGGAGGAGGCTAGCAAAGACAAAGAAG	GTCAAGAGCGCCACCTTGTCCTCCACGGAGAGCACGGCGTCTGGAATGCAGGATGAGGTCAGAGCGGTTGGCGAGGAGCAAAGGTCAGAGGAGCCAAAGCGCAGGGTGGATACTTCAGTGTCTTGGGAGGCGTTGATTTGTGTCGGATCGTCCAAGAAGAGAGCGAGGAAGGCATCCTCTTCAGATGATGAAGGAGGGCCAAGAACACTGGGGGGGGATGGCCACAGAGCGGAGGAGGCTAGCAAAGACAAAGAAG	1	2 Base Changes	VKSATLSSTESTASGMQDEVRAVGEEQRSEEPKRRVDTSVSWEALICVGSSKKRARKASSSDDEGGPRTLGGDGHRAEEASKDKE	VKSATLSSTESTASGMQDEVRAVGEEQRSEEPKRRVDTSVSWEALICVGSSKKRARKASSSDDEGGPRTLGGDGHRAEEASKDKE
GTCAAGAGCGCCACCTTGTCCTCCACGGAGAGCACGGCGTCTGGAATGCAGGATGAGGTCAGAGCGGTTGGCGAGGAGCAAAGGTCAGAGGAGCCAAAGCGCAGGGTGGATACTTCAGTGTCTTGGGAGGCGTTGATTTGTGTCGGATCGTCCAAGAAGAGAGCGAGGAAGGCATCCTCTTCAGATGATGAAGGAGGGCCAAGAACGCTGGGAGGGGATGGCCACAGAGCAGAGGAGGCTAGCAAAGACAAAGAAG	GTCAAGAGCGCCACCTTGTCCTCCACGGAGAGCACGGCGTCTGGAATGCAGGATGAGGTCAGAGCGGTTGGCGAGGAGCAAAGGTCAGAGGAGCCAAAGCGCAGGGTGGATACTTCAGTGTCTTGGGAGGCGTTGATTTGTGTCGGATCGTCCAAGAAGAGAGCGAGGAAGGCATCCTCTTCAGATGATGAAGGAGGGCCAAGAACGCTGGGAGGGGATGGCCACAGAGCAGAGGAGGCTAGCAAAGACAAAGAAG	1	3 Base Changes	VKSATLSSTESTASGMQDEVRAVGEEQRSEEPKRRVDTSVSWEALICVGSSKKRARKASSSDDEGGPRTLGGDGHRAEEASKDKE	VKSATLSSTESTASGMQDEVRAVGEEQRSEEPKRRVDTSVSWEALICVGSSKKRARKASSSDDEGGPRTLGGDGHRAEEASKDKE
GTCAAGAGCGCCACCTTGTCCTCCACGGAGAGCACGGCGTCTGGAATGCAGGATGAGGTCAGAGCGGTTGGCGAGGAGCAAAGGTCAGAGGAGCCAAAGCGCAGGGTGGATACTTCAGTGTCTTGGGAGGCGTTGATTTGTGTCGGATCGTCCAAGAAGAGAGCGAGGAAGGCATCCTCTTCAGATGATGAAGGAGGGCCAAGACCACTGGGAGGGGATGGCCACAGAGCGGAGGAGGCTAGCAAAGACAAAGAAG	GTCAAGAGCGCCACCTTGTCCTCCACGGAGAGCACGGCGTCTGGAATGCAGGATGAGGTCAGAGCGGTTGGCGAGGAGCAAAGGTCAGAGGAGCCAAAGCGCAGGGTGGATACTTCAGTGTCTTGGGAGGCGTTGATTTGTGTCGGATCGTCCAAGAAGAGAGCGAGGAAGGCATCCTCTTCAGATGATGAAGGAGGGCCAAGACCACTGGGAGGGGATGGCCACAGAGCGGAGGAGGCTAGCAAAGACAAAGAAG	1	2 Base Changes	VKSATLSSTESTASGMQDEVRAVGEEQRSEEPKRRVDTSVSWEALICVGSSKKRARKASSSDDEGGPRPLGGDGHRAEEASKDKE	VKSATLSSTESTASGMQDEVRAVGEEQRSEEPKRRVDTSVSWEALICVGSSKKRARKASSSDDEGGPRTLGGDGHRAEEASKDKE
GTCAAGAGCGCCACCTTGTCCTCCACGGAGAGCACGGCGTCTGGAATGCAGGATGAGGTCAGAGCGGTTGGCGAGGAGCAAAGGTCAGAGGAGCCAAAGCGCAGGGTGGATACTTCAGTGTCTTGGGAGGCGTTGATTTGTGTCGGATCGTCCAAGAAGAGAGCGAGGAAGGCATCCTCTTCAGATGATGAAGGAGGGCCACGAACACTGGGAGGGGATGGCCACAGAGCGGAGGAGGCTAGCAAAGACAAAGAAG	GTCAAGAGCGCCACCTTGTCCTCCACGGAGAGCACGGCGTCTGGAATGCAGGATGAGGTCAGAGCGGTTGGCGAGGAGCAAAGGTCAGAGGAGCCAAAGCGCAGGGTGGATACTTCAGTGTCTTGGGAGGCGTTGATTTGTGTCGGATCGTCCAAGAAGAGAGCGAGGAAGGCATCCTCTTCAGATGATGAAGGAGGGCCACGAACACTGGGAGGGGATGGCCACAGAGCGGAGGAGGCTAGCAAAGACAAAGAAG	1	2 Base Changes	VKSATLSSTESTASGMQDEVRAVGEEQRSEEPKRRVDTSVSWEALICVGSSKKRARKASSSDDEGGPRTLGGDGHRAEEASKDKE	VKSATLSSTESTASGMQDEVRAVGEEQRSEEPKRRVDTSVSWEALICVGSSKKRARKASSSDDEGGPRTLGGDGHRAEEASKDKE
GTCAAGAGCGCCACCTTGTCCTCCACGGAGAGCACGGCGTCTGGAATGCAGGATGAGGTCAGAGCGGTTGGCGAGGAGCAAAGGTCAGAGGAGCCAAAGCGCAGGGTGGATACTTCAGTGTCTTGGGAGGCGTTGATTTGTGTCGGATCGTCCAAGAAGAGAGCGAGGAAGGCATCCTCTTCAGATGATGAAGGAGGGCCAGGAACACTGGGAGGGGATGGCCACAGAGCGGAGGAGGCTAGCAAAGACAAAGAAG	GTCAAGAGCGCCACCTTGTCCTCCACGGAGAGCACGGCGTCTGGAATGCAGGATGAGGTCAGAGCGGTTGGCGAGGAGCAAAGGTCAGAGGAGCCAAAGCGCAGGGTGGATACTTCAGTGTCTTGGGAGGCGTTGATTTGTGTCGGATCGTCCAAGAAGAGAGCGAGGAAGGCATCCTCTTCAGATGATGAAGGAGGGCCAGGAACACTGGGAGGGGATGGCCACAGAGCGGAGGAGGCTAGCAAAGACAAAGAAG	1	2 Base Changes	VKSATLSSTESTASGMQDEVRAVGEEQRSEEPKRRVDTSVSWEALICVGSSKKRARKASSSDDEGGPGTLGGDGHRAEEASKDKE	VKSATLSSTESTASGMQDEVRAVGEEQRSEEPKRRVDTSVSWEALICVGSSKKRARKASSSDDEGGPRTLGGDGHRAEEASKDKE
GTCAAGAGCGCCACCTTGTCCTCCACGGAGAGCACGGCGTCTGGAATGCAGGATGAGGTCAGAGCGGTTGGCGAGGAGCAAAGGTCAGAGGAGCCAAAGCGCAGGGTGGATACTTCAGTGTCTTGGGAGGCGTTGATTTGTGTCGGATCGTCCAAGAAGAGAGCGAGGAGGGCATCCTCTTCAGATGATGAAGGAGGGCCAAGAACACTGGGAGGGGATGGCCACAGAGCGGAGGAGGCTAGCAAAGACAAAGAAG	GTCAAGAGCGCCACCTTGTCCTCCACGGAGAGCACGGCGTCTGGAATGCAGGATGAGGTCAGAGCGGTTGGCGAGGAGCAAAGGTCAGAGGAGCCAAAGCGCAGGGTGGATACTTCAGTGTCTTGGGAGGCGTTGATTTGTGTCGGATCGTCCAAGAAGAGAGCGAGGAGGGCATCCTCTTCAGATGATGAAGGAGGGCCAAGAACACTGGGAGGGGATGGCCACAGAGCGGAGGAGGCTAGCAAAGACAAAGAAG	1	2 Base Changes	VKSATLSSTESTASGMQDEVRAVGEEQRSEEPKRRVDTSVSWEALICVGSSKKRARRASSSDDEGGPRTLGGDGHRAEEASKDKE	VKSATLSSTESTASGMQDEVRAVGEEQRSEEPKRRVDTSVSWEALICVGSSKKRARKASSSDDEGGPRTLGGDGHRAEEASKDKE
GTCAAGAGCGCCACCTTGTCCTCCACGGAGAGCACGGCGTCTGGAATGCAGGATGAGGTCAGAGCGGTTGGCGAGGAGCAAAGGTCAGAGGAGCCAAAGCGCAGGGTGGATACTTCAGTGTCTTGGGAGGCGTTGATTTGTGTCGGATCGTCCAAGAAGAGAGCGAGGATGGCATCCTCTTCAGATGATGAAGGAGGGCCAAGAACACTGGGAGGGGATGGCCACAGAGCGGAGGAGGCTAGCAAAGACAAAGAAG	GTCAAGAGCGCCACCTTGTCCTCCACGGAGAGCACGGCGTCTGGAATGCAGGATGAGGTCAGAGCGGTTGGCGAGGAGCAAAGGTCAGAGGAGCCAAAGCGCAGGGTGGATACTTCAGTGTCTTGGGAGGCGTTGATTTGTGTCGGATCGTCCAAGAAGAGAGCGAGGATGGCATCCTCTTCAGATGATGAAGGAGGGCCAAGAACACTGGGAGGGGATGGCCACAGAGCGGAGGAGGCTAGCAAAGACAAAGAAG	1	2 Base Changes	VKSATLSSTESTASGMQDEVRAVGEEQRSEEPKRRVDTSVSWEALICVGSSKKRARMASSSDDEGGPRTLGGDGHRAEEASKDKE	VKSATLSSTESTASGMQDEVRAVGEEQRSEEPKRRVDTSVSWEALICVGSSKKRARKASSSDDEGGPRTLGGDGHRAEEASKDKE
GTCAAGAGCGCCACCTTGTCCTCCACGGAGAGCACGGCGTCTGGAATGCAGGATGAGGTCAGAGCGGTTGGCGAGGAGCAAAGGTCAGAGGAGCCAAAGCGCAGGGTGGATACTTCAGTGTCTTGGGAGGCGTTGATTTGTGTCGGATCGTCCAAGAAGAGAGTGAGGAAGGCATCCTCTTCAGATGATGAAGGAGGGCCAAGAACACTGGGAGGGGATGGCCACAGAGCGGAGGAGGCTAGCAAAGACAAAGAAG	GTCAAGAGCGCCACCTTGTCCTCCACGGAGAGCACGGCGTCTGGAATGCAGGATGAGGTCAGAGCGGTTGGCGAGGAGCAAAGGTCAGAGGAGCCAAAGCGCAGGGTGGATACTTCAGTGTCTTGGGAGGCGTTGATTTGTGTCGGATCGTCCAAGAAGAGAGTGAGGAAGGCATCCTCTTCAGATGATGAAGGAGGGCCAAGAACACTGGGAGGGGATGGCCACAGAGCGGAGGAGGCTAGCAAAGACAAAGAAG	1	2 Base Changes	VKSATLSSTESTASGMQDEVRAVGEEQRSEEPKRRVDTSVSWEALICVGSSKKRVRKASSSDDEGGPRTLGGDGHRAEEASKDKE	VKSATLSSTESTASGMQDEVRAVGEEQRSEEPKRRVDTSVSWEALICVGSSKKRARKASSSDDEGGPRTLGGDGHRAEEASKDKE
GTCAAGAGCGCCACCTTGTCCTCCACGGAGAGCACGGCGTCTGGAATGCAGGATGAGGTCAGAGCGGTTGGCGAGGAGCAAAGGTCAGAGGAGCCAAAGCGCAGGGTGGATACTTCAGTGTCTTGGGAGGCGTTGATTTGTGTCGGATCGTCCAAGAAGAGGGCGAGGAAGGCATCCTCTTCAGATGATGAAGGAGGGCCAAGAACACTGGGAGGGGATGGCCACAGAGCGGAGGAGGCTAGCAAAGACAAAGAAG	GTCAAGAGCGCCACCTTGTCCTCCACGGAGAGCACGGCGTCTGGAATGCAGGATGAGGTCAGAGCGGTTGGCGAGGAGCAAAGGTCAGAGGAGCCAAAGCGCAGGGTGGATACTTCAGTGTCTTGGGAGGCGTTGATTTGTGTCGGATCGTCCAAGAAGAGGGCGAGGAAGGCATCCTCTTCAGATGATGAAGGAGGGCCAAGAACACTGGGAGGGGATGGCCACAGAGCGGAGGAGGCTAGCAAAGACAAAGAAG	1	2 Base Changes	VKSATLSSTESTASGMQDEVRAVGEEQRSEEPKRRVDTSVSWEALICVGSSKKRARKASSSDDEGGPRTLGGDGHRAEEASKDKE	VKSATLSSTESTASGMQDEVRAVGEEQRSEEPKRRVDTSVSWEALICVGSSKKRARKASSSDDEGGPRTLGGDGHRAEEASKDKE
GTCAAGAGCGCCACCTTGTCCTCCACGGAGAGCACGGCGTCTGGAATGCAGGATGAGGTCAGAGCGGTTGGCGAGGAGCAAAGGTCAGAGGAGCCAAAGCGCAGGGTGGATACTTCAGTGTCTTGGGAGGCGTTGATTTGTGTCGGATCGTCCAAGAAGAGTGCGAGGAAGGCATCCTCTTCAGATGATGAAGGAGGGCCAAGAACACTGGGAGGGGATGGCCACAGAGCGGAGGAGGCTAGCAAAGACAAAGAAG	GTCAAGAGCGCCACCTTGTCCTCCACGGAGAGCACGGCGTCTGGAATGCAGGATGAGGTCAGAGCGGTTGGCGAGGAGCAAAGGTCAGAGGAGCCAAAGCGCAGGGTGGATACTTCAGTGTCTTGGGAGGCGTTGATTTGTGTCGGATCGTCCAAGAAGAGTGCGAGGAAGGCATCCTCTTCAGATGATGAAGGAGGGCCAAGAACACTGGGAGGGGATGGCCACAGAGCGGAGGAGGCTAGCAAAGACAAAGAAG	1	2 Base Changes	VKSATLSSTESTASGMQDEVRAVGEEQRSEEPKRRVDTSVSWEALICVGSSKKSARKASSSDDEGGPRTLGGDGHRAEEASKDKE	VKSATLSSTESTASGMQDEVRAVGEEQRSEEPKRRVDTSVSWEALICVGSSKKRARKASSSDDEGGPRTLGGDGHRAEEASKDKE
GTCAAGAGCGCCACCTTGTCCTCCACGGAGAGCACGGCGTCTGGAATGCAGGATGAGGTCAGAGCGGTTGGCGAGGAGCAAAGGTCAGAGGAGCCAAAGCGCAGGGTGGATACTTCAGTGTCTTGGGAGGCTTTGATTTGTGTCGGATCGTCCAAGAAGAGAGCGAGGAAGGCATCCTCTTCAGATGATGAAGGAGGGCCAAGAACACTGGGAGGGGATGGCCACAGAGCGGAGGAGGCTAGCAAAGACAAAGAAG	GTCAAGAGCGCCACCTTGTCCTCCACGGAGAGCACGGCGTCTGGAATGCAGGATGAGGTCAGAGCGGTTGGCGAGGAGCAAAGGTCAGAGGAGCCAAAGCGCAGGGTGGATACTTCAGTGTCTTGGGAGGCTTTGATTTGTGTCGGATCGTCCAAGAAGAGAGCGAGGAAGGCATCCTCTTCAGATGATGAAGGAGGGCCAAGAACACTGGGAGGGGATGGCCACAGAGCGGAGGAGGCTAGCAAAGACAAAGAAG	1	2 Base Changes	VKSATLSSTESTASGMQDEVRAVGEEQRSEEPKRRVDTSVSWEALICVGSSKKRARKASSSDDEGGPRTLGGDGHRAEEASKDKE	VKSATLSSTESTASGMQDEVRAVGEEQRSEEPKRRVDTSVSWEALICVGSSKKRARKASSSDDEGGPRTLGGDGHRAEEASKDKE
GTCAAGAGCGCCACCTTGTCCTCCACGGAGAGCACGGCGTCTGGAATGCAGGATGAGGTCAGAGCGGTTGGCGAGGAGCAAAGGTCAGAGGAGCCAAAGCGCAGGGTGGATACTTCAGTGTCTTGGGGGGCGTTGATTTGTGTCGGATCGTCCAAGAAGAGAGCGAGGAAGGCATCCTCTTCAGATGATGAAGGAGGGCCAAGAACACTGGGAGGGGATGGCCACAGAGCGGAGGAGGCTAGCAAAGACAAAGAAG	GTCAAGAGCGCCACCTTGTCCTCCACGGAGAGCACGGCGTCTGGAATGCAGGATGAGGTCAGAGCGGTTGGCGAGGAGCAAAGGTCAGAGGAGCCAAAGCGCAGGGTGGATACTTCAGTGTCTTGGGGGGCGTTGATTTGTGTCGGATCGTCCAAGAAGAGAGCGAGGAAGGCATCCTCTTCAGATGATGAAGGAGGGCCAAGAACACTGGGAGGGGATGGCCACAGAGCGGAGGAGGCTAGCAAAGACAAAGAAG	1	2 Base Changes	VKSATLSSTESTASGMQDEVRAVGEEQRSEEPKRRVDTSVSWGALICVGSSKKRARKASSSDDEGGPRTLGGDGHRAEEASKDKE	VKSATLSSTESTASGMQDEVRAVGEEQRSEEPKRRVDTSVSWEALICVGSSKKRARKASSSDDEGGPRTLGGDGHRAEEASKDKE
GTCAAGAGCGCCACCTTGTCCTCCACGGAGAGCACGGCGTCTGGAATGCAGGATGAGGTCAGAGCGGTTGGCGAGGAGCAAAGGTCAGAGGAGCCAAAGCGCAGGGTGGATACTTCAGTGTCTTGGGGGGCGTTGATTTGTGTCGGATCGTCCAAGAAGAGAGCGAGGAAGGCATCCTCTTCAGATGATGAAGGAGGGCCAAGAACACTGGGAGGGGATGGCCACAGAGCGGAGGATGCTAGCAAAGACTAAGAAG	GTCAAGAGCGCCACCTTGTCCTCCACGGAGAGCACGGCGTCTGGAATGCAGGATGAGGTCAGAGCGGTTGGCGAGGAGCAAAGGTCAGAGGAGCCAAAGCGCAGGGTGGATACTTCAGTGTCTTGGGGGGCGTTGATTTGTGTCGGATCGTCCAAGAAGAGAGCGAGGAAGGCATCCTCTTCAGATGATGAAGGAGGGCCAAGAACACTGGGAGGGGATGGCCACAGAGCGGAGGATGCTAGCAAAGACTAAGAAG	1	4 Base Changes	VKSATLSSTESTASGMQDEVRAVGEEQRSEEPKRRVDTSVSWGALICVGSSKKRARKASSSDDEGGPRTLGGDGHRAEDASKD*	VKSATLSSTESTASGMQDEVRAVGEEQRSEEPKRRVDTSVSWEALICVGSSKKRARKASSSDDEGGPRTLGGDGHRAEEASKDKE
GTCAAGAGCGCCACCTTGTCCTCCACGGAGAGCACGGCGTCTGGAATGCAGGATGAGGTCAGAGCGGTTGGCGAGGAGCAAGGGTCAGAGGAGCCAAAGCGCAGGGTGGATACTTCAGTGTCTTGGGAGGCGTTGATTTGTGTCGGATCGTCCAAGAAGAGAGCGAGGAAGGCATCCTCTTCAGATGATGAAGGAGGGCCAAGAACACTGGGAGGGGATGGCCACAGAGCGGAGGAGGCTAGCAAAGACAAAGAAG	GTCAAGAGCGCCACCTTGTCCTCCACGGAGAGCACGGCGTCTGGAATGCAGGATGAGGTCAGAGCGGTTGGCGAGGAGCAAGGGTCAGAGGAGCCAAAGCGCAGGGTGGATACTTCAGTGTCTTGGGAGGCGTTGATTTGTGTCGGATCGTCCAAGAAGAGAGCGAGGAAGGCATCCTCTTCAGATGATGAAGGAGGGCCAAGAACACTGGGAGGGGATGGCCACAGAGCGGAGGAGGCTAGCAAAGACAAAGAAG	1	2 Base Changes	VKSATLSSTESTASGMQDEVRAVGEEQGSEEPKRRVDTSVSWEALICVGSSKKRARKASSSDDEGGPRTLGGDGHRAEEASKDKE	VKSATLSSTESTASGMQDEVRAVGEEQRSEEPKRRVDTSVSWEALICVGSSKKRARKASSSDDEGGPRTLGGDGHRAEEASKDKE
GTCAAGAGCGCCACCTTGTCCTCCACGGAGAGCACGGCGTCTGGAATGCAGGATGAGGTCAGAGCGGTTGGCGAGGAGCACAGGTCAGAGGAGCCAAAGCGCAGGGTGGATACTTCAGTGTCTTGGGAGGCGTTGATTTGTGTCGGATCGTCCAAGAAGAGAGCGAGGAAGGCATCCTCTTCAGATGATGAAGGAGGGCCAAGAACACTGGGAGGGGATGGCCACAGAGCGGAGGAGGCTAGCAAAGACAAAGAAG	GTCAAGAGCGCCACCTTGTCCTCCACGGAGAGCACGGCGTCTGGAATGCAGGATGAGGTCAGAGCGGTTGGCGAGGAGCACAGGTCAGAGGAGCCAAAGCGCAGGGTGGATACTTCAGTGTCTTGGGAGGCGTTGATTTGTGTCGGATCGTCCAAGAAGAGAGCGAGGAAGGCATCCTCTTCAGATGATGAAGGAGGGCCAAGAACACTGGGAGGGGATGGCCACAGAGCGGAGGAGGCTAGCAAAGACAAAGAAG	1	2 Base Changes	VKSATLSSTESTASGMQDEVRAVGEEHRSEEPKRRVDTSVSWEALICVGSSKKRARKASSSDDEGGPRTLGGDGHRAEEASKDKE	VKSATLSSTESTASGMQDEVRAVGEEQRSEEPKRRVDTSVSWEALICVGSSKKRARKASSSDDEGGPRTLGGDGHRAEEASKDKE
GTCAAGAGCGCCACCTTGTCCTCCACGGAGAGCACGGCGTCTGGAATGCAGGATGAGGTCGGAGCGGTTGGCGAGGAGCAAAGGTCAGAGGAGCCAAAGCGCAGGGTGGATACTTCAGTGTCTTGGGAGGCGTTGATTTGTGTCGGATCGTCCAAGAAGAGAGCGAGGAAGGCATCCTCTTCAGATGATGAAGGAGGGCCAAGAACACTGGGAGGGGATGGCCACAGAGCGGAGGAGGCTAGCAAAGACAAAGAAG	GTCAAGAGCGCCACCTTGTCCTCCACGGAGAGCACGGCGTCTGGAATGCAGGATGAGGTCGGAGCGGTTGGCGAGGAGCAAAGGTCAGAGGAGCCAAAGCGCAGGGTGGATACTTCAGTGTCTTGGGAGGCGTTGATTTGTGTCGGATCGTCCAAGAAGAGAGCGAGGAAGGCATCCTCTTCAGATGATGAAGGAGGGCCAAGAACACTGGGAGGGGATGGCCACAGAGCGGAGGAGGCTAGCAAAGACAAAGAAG	1	2 Base Changes	VKSATLSSTESTASGMQDEVGAVGEEQRSEEPKRRVDTSVSWEALICVGSSKKRARKASSSDDEGGPRTLGGDGHRAEEASKDKE	VKSATLSSTESTASGMQDEVRAVGEEQRSEEPKRRVDTSVSWEALICVGSSKKRARKASSSDDEGGPRTLGGDGHRAEEASKDKE
GTCAAGAGCGCCACCTTGTCCTCCACGGAGAGCACGGCGTCTGGAATGCAGGATGGGGTCAGAGCGGTTGGCGAGGAGCAAAGGTCAGAGGAGCCAAAGCGCAGGGTGGATACTTCAGTGTCTTGGGAGGCGTTGATTTGTGTCGGATCGTCCAAGAAGAGAGCGAGGAAGGCATCCTCTTCAGATGATGAAGGAGGGCCAAGAACACTGGGAGGGGACGGCCACAGAGCGGAGGAGGCTAGCAAAGACAAAGAAG	GTCAAGAGCGCCACCTTGTCCTCCACGGAGAGCACGGCGTCTGGAATGCAGGATGGGGTCAGAGCGGTTGGCGAGGAGCAAAGGTCAGAGGAGCCAAAGCGCAGGGTGGATACTTCAGTGTCTTGGGAGGCGTTGATTTGTGTCGGATCGTCCAAGAAGAGAGCGAGGAAGGCATCCTCTTCAGATGATGAAGGAGGGCCAAGAACACTGGGAGGGGACGGCCACAGAGCGGAGGAGGCTAGCAAAGACAAAGAAG	1	3 Base Changes	VKSATLSSTESTASGMQDGVRAVGEEQRSEEPKRRVDTSVSWEALICVGSSKKRARKASSSDDEGGPRTLGGDGHRAEEASKDKE	VKSATLSSTESTASGMQDEVRAVGEEQRSEEPKRRVDTSVSWEALICVGSSKKRARKASSSDDEGGPRTLGGDGHRAEEASKDKE
GTCAAGAGCGCCACCTTGTCCTCCACGGAGAGCACGGCGTCTGGAATGCAGGATGTGGTCAGAGCGGTTGGCGAGGAGCAAAGGTCAGAGGAGCCAAAGCGCAGGGTGGATACTTCAGTGTCTTGGGAGGCGTTGATTTGTGTCGGATCGTCCAAGAAGAGAGCGAGGAAGGCATCCTCTTCAGATGATGAAGGAGGGCCAAGAACACTGGGAGGGGATGGCCACAGAGCGGAGGAGGCTAGCAAAGACAAAGAAG	GTCAAGAGCGCCACCTTGTCCTCCACGGAGAGCACGGCGTCTGGAATGCAGGATGTGGTCAGAGCGGTTGGCGAGGAGCAAAGGTCAGAGGAGCCAAAGCGCAGGGTGGATACTTCAGTGTCTTGGGAGGCGTTGATTTGTGTCGGATCGTCCAAGAAGAGAGCGAGGAAGGCATCCTCTTCAGATGATGAAGGAGGGCCAAGAACACTGGGAGGGGATGGCCACAGAGCGGAGGAGGCTAGCAAAGACAAAGAAG	1	2 Base Changes	VKSATLSSTESTASGMQDVVRAVGEEQRSEEPKRRVDTSVSWEALICVGSSKKRARKASSSDDEGGPRTLGGDGHRAEEASKDKE	VKSATLSSTESTASGMQDEVRAVGEEQRSEEPKRRVDTSVSWEALICVGSSKKRARKASSSDDEGGPRTLGGDGHRAEEASKDKE
GTCAAGAGCGCCACCTTGTCCTCCACGGAGAGCACGGCGTCTGGAATGCAGGCTGAGGTCAGAGCGGTTGGCGAGGAGCAAAGGTCAGAGGAGCCAAAGCGCAGGGTGGATACTTCAGTGTCTTGGGAGGCGTTGATTTGTGTCGGATCGTCCAAGAAGAGAGCGAGGAAGGCATCCTCTTCAGATGATGAAGGAGGGCCAAGAACACTGGGAGGGGATGGCCACAGAGCGGAGGAGGCTAGCAAAGACAAAGAAG	GTCAAGAGCGCCACCTTGTCCTCCACGGAGAGCACGGCGTCTGGAATGCAGGCTGAGGTCAGAGCGGTTGGCGAGGAGCAAAGGTCAGAGGAGCCAAAGCGCAGGGTGGATACTTCAGTGTCTTGGGAGGCGTTGATTTGTGTCGGATCGTCCAAGAAGAGAGCGAGGAAGGCATCCTCTTCAGATGATGAAGGAGGGCCAAGAACACTGGGAGGGGATGGCCACAGAGCGGAGGAGGCTAGCAAAGACAAAGAAG	1	2 Base Changes	VKSATLSSTESTASGMQAEVRAVGEEQRSEEPKRRVDTSVSWEALICVGSSKKRARKASSSDDEGGPRTLGGDGHRAEEASKDKE	VKSATLSSTESTASGMQDEVRAVGEEQRSEEPKRRVDTSVSWEALICVGSSKKRARKASSSDDEGGPRTLGGDGHRAEEASKDKE
GTCAAGAGCGCCACCTTGTCCTCCACGGAGGGCACGGCGTCTGGAATGCAGGATGAGGTCAGAGCGGTTGGCGAGGAGCAAAGGTCAGAGGAGCCAAAGCGCAGGGTGGATACTTCAGTGTCTTGGGAGGCGTTGATTTGTGTCGGATCGTCCAAGAAGAGAGCGAGGAAGGCATCCTCTTCAGATGATGAAGGAGGGCCAAGAACACTGGGAGGGGATGGCCACAGAGCGGAGGAGGCTAGCAAAGACAAAGAAG	GTCAAGAGCGCCACCTTGTCCTCCACGGAGGGCACGGCGTCTGGAATGCAGGATGAGGTCAGAGCGGTTGGCGAGGAGCAAAGGTCAGAGGAGCCAAAGCGCAGGGTGGATACTTCAGTGTCTTGGGAGGCGTTGATTTGTGTCGGATCGTCCAAGAAGAGAGCGAGGAAGGCATCCTCTTCAGATGATGAAGGAGGGCCAAGAACACTGGGAGGGGATGGCCACAGAGCGGAGGAGGCTAGCAAAGACAAAGAAG	1	2 Base Changes	VKSATLSSTEGTASGMQDEVRAVGEEQRSEEPKRRVDTSVSWEALICVGSSKKRARKASSSDDEGGPRTLGGDGHRAEEASKDKE	VKSATLSSTESTASGMQDEVRAVGEEQRSEEPKRRVDTSVSWEALICVGSSKKRARKASSSDDEGGPRTLGGDGHRAEEASKDKE
GTCAAGAGCGCCACCTTGTCCTCCACGGGGAGCACGGCGTCTGGAATGCAGGATGAGGTCAGAGCGGTTGGCGAGGAGCAAAGGTCAGAGGAGCCAAAGCGCAGGGTGGATACTTCAGTGTCTTGGGAGGCGTTGATTTGTGTCGGATCGTCCAAGAAGAGAGCGAGGAAGGCATCCTCTTCAGATGATGAAGGAGGGCCAAGAACACTGGGAGGGGATGGCCACAGAGCGGAGGAGGCTAGCAAAGACAAAGAAG	GTCAAGAGCGCCACCTTGTCCTCCACGGGGAGCACGGCGTCTGGAATGCAGGATGAGGTCAGAGCGGTTGGCGAGGAGCAAAGGTCAGAGGAGCCAAAGCGCAGGGTGGATACTTCAGTGTCTTGGGAGGCGTTGATTTGTGTCGGATCGTCCAAGAAGAGAGCGAGGAAGGCATCCTCTTCAGATGATGAAGGAGGGCCAAGAACACTGGGAGGGGATGGCCACAGAGCGGAGGAGGCTAGCAAAGACAAAGAAG	1	2 Base Changes	VKSATLSSTGSTASGMQDEVRAVGEEQRSEEPKRRVDTSVSWEALICVGSSKKRARKASSSDDEGGPRTLGGDGHRAEEASKDKE	VKSATLSSTESTASGMQDEVRAVGEEQRSEEPKRRVDTSVSWEALICVGSSKKRARKASSSDDEGGPRTLGGDGHRAEEASKDKE
GTCAAGAGGGCCACCTTGTCCTCCACGGAGAGCACGGCGTCTGGAATGCAGGATGAGGTCAGAGCGGTTGGCGAGGAGCAAAGGTCAGAGGAGCCAAAGCGCAGGGTGGATACTTCAGTGTCTTGGGAGGCGTTGATTTGTGTCGGATCGTCCAAGAAGAGAGCGAGGAAGGCATCCTCTTCAGATGATGAAGGAGGGCCAAGAACACTGGGAGGGGATGGCCACAGAGCGGAGGAGGCTAGCAGAGACAAAGAAG	GTCAAGAGGGCCACCTTGTCCTCCACGGAGAGCACGGCGTCTGGAATGCAGGATGAGGTCAGAGCGGTTGGCGAGGAGCAAAGGTCAGAGGAGCCAAAGCGCAGGGTGGATACTTCAGTGTCTTGGGAGGCGTTGATTTGTGTCGGATCGTCCAAGAAGAGAGCGAGGAAGGCATCCTCTTCAGATGATGAAGGAGGGCCAAGAACACTGGGAGGGGATGGCCACAGAGCGGAGGAGGCTAGCAGAGACAAAGAAG	1	2 Base Changes	VKRATLSSTESTASGMQDEVRAVGEEQRSEEPKRRVDTSVSWEALICVGSSKKRARKASSSDDEGGPRTLGGDGHRAEEASRDKE	VKSATLSSTESTASGMQDEVRAVGEEQRSEEPKRRVDTSVSWEALICVGSSKKRARKASSSDDEGGPRTLGGDGHRAEEASKDKE
GTCAAGAGGGCCACCTTGTCCTCCACGGAGAGCACGGCGTCTGGAATGCAGGATGAGGTCAGAGCGGTTGGCGAGGAGCAAAGGTCAGAGGAGCCAAAGCGCAGGGTGGATACTTCAGTGTCTTGGGAGGCGTTGATTTGTGTCGGATCGTCCAAGAAGAGAGCGAGGAAGTCATCCTCTTCAGATGATGAAGGAGGGCCAAGAACACTGGGAGGGGATGGCCACAGAGCGGATGAGGCTAGCAAAGACAAAGAAG	GTCAAGAGGGCCACCTTGTCCTCCACGGAGAGCACGGCGTCTGGAATGCAGGATGAGGTCAGAGCGGTTGGCGAGGAGCAAAGGTCAGAGGAGCCAAAGCGCAGGGTGGATACTTCAGTGTCTTGGGAGGCGTTGATTTGTGTCGGATCGTCCAAGAAGAGAGCGAGGAAGTCATCCTCTTCAGATGATGAAGGAGGGCCAAGAACACTGGGAGGGGATGGCCACAGAGCGGATGAGGCTAGCAAAGACAAAGAAG	1	3 Base Changes	VKRATLSSTESTASGMQDEVRAVGEEQRSEEPKRRVDTSVSWEALICVGSSKKRARKSSSSDDEGGPRTLGGDGHRADEASKDKE	VKSATLSSTESTASGMQDEVRAVGEEQRSEEPKRRVDTSVSWEALICVGSSKKRARKASSSDDEGGPRTLGGDGHRAEEASKDKE
GTCAAGAGGGCCACCTTGTCCTCCACGGAGAGCACGGCGTCTGGAATGCAGGATGAGGTCAGAGCGGTTGGCGAGGAGCAAAGGTCAGAGGAGCCAAAGCGCAGGGTGGATACTTCAGTGTCTTGGGAGGCGTTGATTTGTGTCGGATCGTCCAAGACGAGCGCGAGGAAGGCATCCTCTTCAGATGATGAAGGAGGGCCAGGAACACTGGGAGGGGATGGCCACAGAGCGGAGGAGGCTAGCAAAGACAAAGAAG	GTCAAGAGGGCCACCTTGTCCTCCACGGAGAGCACGGCGTCTGGAATGCAGGATGAGGTCAGAGCGGTTGGCGAGGAGCAAAGGTCAGAGGAGCCAAAGCGCAGGGTGGATACTTCAGTGTCTTGGGAGGCGTTGATTTGTGTCGGATCGTCCAAGACGAGCGCGAGGAAGGCATCCTCTTCAGATGATGAAGGAGGGCCAGGAACACTGGGAGGGGATGGCCACAGAGCGGAGGAGGCTAGCAAAGACAAAGAAG	1	4 Base Changes	VKRATLSSTESTASGMQDEVRAVGEEQRSEEPKRRVDTSVSWEALICVGSSKTSARKASSSDDEGGPGTLGGDGHRAEEASKDKE	VKSATLSSTESTASGMQDEVRAVGEEQRSEEPKRRVDTSVSWEALICVGSSKKRARKASSSDDEGGPRTLGGDGHRAEEASKDKE
GTCAAGAGTACCACCTTGTCCTCCACGGAGAGCACGGCGTCTGGAATGCAGGATGAGATCAGAGCGGTTGGCGAGGAGCAAAGGTCAGAGGAGCCAAAGCGCAGGGTGGATACTTCAGTGTCTTGGGAGGCGTTGATTTGTGTCGGATCGTCCAAGAAGAGAGCGAGGAAGGCATCCTCTTCAGATGATGAAGGAGGGCCAAGAACACTGGGAGGGGATGGCCACAGAGCGGAGGAGGCTAGCAAAGACAAAGAAG	GTCAAGAGTACCACCTTGTCCTCCACGGAGAGCACGGCGTCTGGAATGCAGGATGAGATCAGAGCGGTTGGCGAGGAGCAAAGGTCAGAGGAGCCAAAGCGCAGGGTGGATACTTCAGTGTCTTGGGAGGCGTTGATTTGTGTCGGATCGTCCAAGAAGAGAGCGAGGAAGGCATCCTCTTCAGATGATGAAGGAGGGCCAAGAACACTGGGAGGGGATGGCCACAGAGCGGAGGAGGCTAGCAAAGACAAAGAAG	1	2 Base Changes	VKSTTLSSTESTASGMQDEIRAVGEEQRSEEPKRRVDTSVSWEALICVGSSKKRARKASSSDDEGGPRTLGGDGHRAEEASKDKE	VKSATLSSTESTASGMQDEVRAVGEEQRSEEPKRRVDTSVSWEALICVGSSKKRARKASSSDDEGGPRTLGGDGHRAEEASKDKE
GTCAAGAGTACCACCTTGTCCTCCACGGAGAGCACGGCGTCTGGAATGCAGGATGAGGTCAGAGCGGTTGGCGAGGAGCAAAGGTCAGAGGAGCCAAAGCGCAGGGCGGATACTTCAGTGTCTTGGGAGGCGTTGATTTGTGTCGGATCGTCCAAGAAGAGAGCGAGGAAGGCATCCTCTTCAGATGATGAGGGAGGGCCAAGAACACTGGGAGGGGATGGCCACAGAGCGGAGGAGGCTAGCAAAGACAAAGAAG	GTCAAGAGTACCACCTTGTCCTCCACGGAGAGCACGGCGTCTGGAATGCAGGATGAGGTCAGAGCGGTTGGCGAGGAGCAAAGGTCAGAGGAGCCAAAGCGCAGGGCGGATACTTCAGTGTCTTGGGAGGCGTTGATTTGTGTCGGATCGTCCAAGAAGAGAGCGAGGAAGGCATCCTCTTCAGATGATGAGGGAGGGCCAAGAACACTGGGAGGGGATGGCCACAGAGCGGAGGAGGCTAGCAAAGACAAAGAAG	1	3 Base Changes	VKSTTLSSTESTASGMQDEVRAVGEEQRSEEPKRRADTSVSWEALICVGSSKKRARKASSSDDEGGPRTLGGDGHRAEEASKDKE	VKSATLSSTESTASGMQDEVRAVGEEQRSEEPKRRVDTSVSWEALICVGSSKKRARKASSSDDEGGPRTLGGDGHRAEEASKDKE
GTCAAGAGTACCACCTTGTCCTCCACGGAGAGCACGGCGTCTGGAATGCAGGATGAGGTCAGAGCGGTTGGCGAGGAGCAAAGGTCAGAGGAGCCAAAGCGCAGGGTGGATACTTCAGTGTCTTGGGAGGCGGTGATTTGTGTCGGATCGTCCAAGAAGAGAGCGAGGAAGGCATCCTCTTCAGATGATGAAGGAGGGCCAAGAACACTGGGAGGGGATGGCCACAGAGCGGAGGAGGCTAGCCAAGACAAAGAAG	GTCAAGAGTACCACCTTGTCCTCCACGGAGAGCACGGCGTCTGGAATGCAGGATGAGGTCAGAGCGGTTGGCGAGGAGCAAAGGTCAGAGGAGCCAAAGCGCAGGGTGGATACTTCAGTGTCTTGGGAGGCGGTGATTTGTGTCGGATCGTCCAAGAAGAGAGCGAGGAAGGCATCCTCTTCAGATGATGAAGGAGGGCCAAGAACACTGGGAGGGGATGGCCACAGAGCGGAGGAGGCTAGCCAAGACAAAGAAG	1	3 Base Changes	VKSTTLSSTESTASGMQDEVRAVGEEQRSEEPKRRVDTSVSWEAVICVGSSKKRARKASSSDDEGGPRTLGGDGHRAEEASQDKE	VKSATLSSTESTASGMQDEVRAVGEEQRSEEPKRRVDTSVSWEALICVGSSKKRARKASSSDDEGGPRTLGGDGHRAEEASKDKE
GTCAAGAGTACCACCTTGTCCTCCACGGAGAGCACGGCGTCTGGAATGCAGGATGAGGTCAGAGCGGTTGGCGAGGAGCAAAGGTCAGAGGAGCCAAAGCGCAGGGTGGATACTTCAGTGTCTTGGGAGGCGTTGATTTGTATCGGATCGTCCAAGAAGAGAGCGAGGAAGGCATCCTCTTCAGATGATGAAGGAGGGCCAAGAACACTGGGAGGGGATGGCCACAGAGCGGAGGAGGCTAGCAAAGACAAAGAAG	GTCAAGAGTACCACCTTGTCCTCCACGGAGAGCACGGCGTCTGGAATGCAGGATGAGGTCAGAGCGGTTGGCGAGGAGCAAAGGTCAGAGGAGCCAAAGCGCAGGGTGGATACTTCAGTGTCTTGGGAGGCGTTGATTTGTATCGGATCGTCCAAGAAGAGAGCGAGGAAGGCATCCTCTTCAGATGATGAAGGAGGGCCAAGAACACTGGGAGGGGATGGCCACAGAGCGGAGGAGGCTAGCAAAGACAAAGAAG	1	2 Base Changes	VKSTTLSSTESTASGMQDEVRAVGEEQRSEEPKRRVDTSVSWEALICIGSSKKRARKASSSDDEGGPRTLGGDGHRAEEASKDKE	VKSATLSSTESTASGMQDEVRAVGEEQRSEEPKRRVDTSVSWEALICVGSSKKRARKASSSDDEGGPRTLGGDGHRAEEASKDKE
GTCAAGAGTACCACCTTGTCCTCCACGGAGAGCACGGCGTCTGGAATGCAGGATGAGGTCAGAGCGGTTGGCGAGGAGCAAAGGTCAGAGGAGCCAAAGCGCAGGGTGGATACTTCAGTGTCTTGGGAGGCGTTGATTTGTGTCGGATCGTCCAAGAAGAGAGCGAGGAAGGCATCCTCATCAGATGATGAAGGAGGGCCAAGAACACTGGGAGGGGATGGCCACAGAGCGGAGGAGGCTAGCAAAGACAAAGAAG	GTCAAGAGTACCACCTTGTCCTCCACGGAGAGCACGGCGTCTGGAATGCAGGATGAGGTCAGAGCGGTTGGCGAGGAGCAAAGGTCAGAGGAGCCAAAGCGCAGGGTGGATACTTCAGTGTCTTGGGAGGCGTTGATTTGTGTCGGATCGTCCAAGAAGAGAGCGAGGAAGGCATCCTCATCAGATGATGAAGGAGGGCCAAGAACACTGGGAGGGGATGGCCACAGAGCGGAGGAGGCTAGCAAAGACAAAGAAG	1	2 Base Changes	VKSTTLSSTESTASGMQDEVRAVGEEQRSEEPKRRVDTSVSWEALICVGSSKKRARKASSSDDEGGPRTLGGDGHRAEEASKDKE	VKSATLSSTESTASGMQDEVRAVGEEQRSEEPKRRVDTSVSWEALICVGSSKKRARKASSSDDEGGPRTLGGDGHRAEEASKDKE
GTCAAGAGTACCACCTTGTCCTCCACGGAGAGCACGGCGTCTGGAATGCAGGATGAGGTCAGAGCGGTTGGCGAGGAGCAAAGGTCAGAGGAGCCAAAGCGCAGGGTGGATACTTCAGTGTCTTGGGAGGCGTTGATTTGTGTCGGATCGTCCAAGAAGAGAGCGAGGAAGGCATCCTCTTCAGATGATGAAGGAGGGCCAAGAACACTGGGAGGGGATGGCCACAGAGCAGAGGAGGCTAGCAAAGACAAAGAAG	GTCAAGAGTACCACCTTGTCCTCCACGGAGAGCACGGCGTCTGGAATGCAGGATGAGGTCAGAGCGGTTGGCGAGGAGCAAAGGTCAGAGGAGCCAAAGCGCAGGGTGGATACTTCAGTGTCTTGGGAGGCGTTGATTTGTGTCGGATCGTCCAAGAAGAGAGCGAGGAAGGCATCCTCTTCAGATGATGAAGGAGGGCCAAGAACACTGGGAGGGGATGGCCACAGAGCAGAGGAGGCTAGCAAAGACAAAGAAG	1	2 Base Changes	VKSTTLSSTESTASGMQDEVRAVGEEQRSEEPKRRVDTSVSWEALICVGSSKKRARKASSSDDEGGPRTLGGDGHRAEEASKDKE	VKSATLSSTESTASGMQDEVRAVGEEQRSEEPKRRVDTSVSWEALICVGSSKKRARKASSSDDEGGPRTLGGDGHRAEEASKDKE
GTCAAGAGTACCACCTTGTCCTCCACGGAGAGCACGGCGTCTGGAATGCAGGATGAGGTCAGAGCGGTTGGCGAGGAGCAAAGGTCAGAGGAGCCAAAGCGCAGGGTGGATACTTCAGTGTCTTGGGAGGCGTTGATTTGTGTCGGATCGTCCAAGAAGAGAGCGAGGAAGGCATCCTCTTCAGGTGATGAAGGAGGGCCAAGAACACTGGGAGGGGATGGCCACAGAGCGGAGGAGGCTAGCAAAGACAAAGAAG	GTCAAGAGTACCACCTTGTCCTCCACGGAGAGCACGGCGTCTGGAATGCAGGATGAGGTCAGAGCGGTTGGCGAGGAGCAAAGGTCAGAGGAGCCAAAGCGCAGGGTGGATACTTCAGTGTCTTGGGAGGCGTTGATTTGTGTCGGATCGTCCAAGAAGAGAGCGAGGAAGGCATCCTCTTCAGGTGATGAAGGAGGGCCAAGAACACTGGGAGGGGATGGCCACAGAGCGGAGGAGGCTAGCAAAGACAAAGAAG	1	2 Base Changes	VKSTTLSSTESTASGMQDEVRAVGEEQRSEEPKRRVDTSVSWEALICVGSSKKRARKASSSGDEGGPRTLGGDGHRAEEASKDKE	VKSATLSSTESTASGMQDEVRAVGEEQRSEEPKRRVDTSVSWEALICVGSSKKRARKASSSDDEGGPRTLGGDGHRAEEASKDKE
GTCAAGAGTACCACCTTGTCCTCCACGGAGAGCACGGCGTCTGGAATGCAGGATGAGGTCAGAGCGGTTGGCGAGGAGCAAAGGTCAGAGGAGCCAAAGCGCAGGGTGGATACTTCAGTGTCTTGGGAGGCGTTGATTTGTGTCGGATCGTCCAAGAAGAGGGCGAGGAAGGCATCCTCTTCAGATGATGAAGGAGGGCCAAGAACACTGGGAGGGGATGGCCACAGAGCGGAGGAGTCTAGCAAAGACAAAGAAG	GTCAAGAGTACCACCTTGTCCTCCACGGAGAGCACGGCGTCTGGAATGCAGGATGAGGTCAGAGCGGTTGGCGAGGAGCAAAGGTCAGAGGAGCCAAAGCGCAGGGTGGATACTTCAGTGTCTTGGGAGGCGTTGATTTGTGTCGGATCGTCCAAGAAGAGGGCGAGGAAGGCATCCTCTTCAGATGATGAAGGAGGGCCAAGAACACTGGGAGGGGATGGCCACAGAGCGGAGGAGTCTAGCAAAGACAAAGAAG	1	3 Base Changes	VKSTTLSSTESTASGMQDEVRAVGEEQRSEEPKRRVDTSVSWEALICVGSSKKRARKASSSDDEGGPRTLGGDGHRAEESSKDKE	VKSATLSSTESTASGMQDEVRAVGEEQRSEEPKRRVDTSVSWEALICVGSSKKRARKASSSDDEGGPRTLGGDGHRAEEASKDKE
GTCAAGAGTACCACCTTGTCCTCCACGGAGAGCACGGCGTCTGGAATGCAGGATGAGGTCAGAGCGGTTGGCGAGGAGCAAAGGTCAGAGGAGCCAAAGCGCAGGGTGGATACTTCAGTGTCTTGGGAGGCGTTGATTTGTGTCGGATCGTCCAAGGAGAGAGCGAGGAAGGCATCCTCTTCAGATGATGAAGGAGGGCCAAGAACACTGGGAGGGGATGGCCACAGAGCGGAGGAGGCTAGCAAAGACAAAGAAG	GTCAAGAGTACCACCTTGTCCTCCACGGAGAGCACGGCGTCTGGAATGCAGGATGAGGTCAGAGCGGTTGGCGAGGAGCAAAGGTCAGAGGAGCCAAAGCGCAGGGTGGATACTTCAGTGTCTTGGGAGGCGTTGATTTGTGTCGGATCGTCCAAGGAGAGAGCGAGGAAGGCATCCTCTTCAGATGATGAAGGAGGGCCAAGAACACTGGGAGGGGATGGCCACAGAGCGGAGGAGGCTAGCAAAGACAAAGAAG	1	2 Base Changes	VKSTTLSSTESTASGMQDEVRAVGEEQRSEEPKRRVDTSVSWEALICVGSSKERARKASSSDDEGGPRTLGGDGHRAEEASKDKE	VKSATLSSTESTASGMQDEVRAVGEEQRSEEPKRRVDTSVSWEALICVGSSKKRARKASSSDDEGGPRTLGGDGHRAEEASKDKE
GTCAAGAGTACCACCTTGTCCTCCACGGAGAGCACGGCGTCTGGAATGCAGGATGAGGTCAGAGCGGTTGGCGGGGAGCAAAGGTCAGAGGAGCCAAAGCGCAGGGTGGATACTTCAGTGTCTTGGGAGGCGTTGATTTGTGTCGGATCGTCCAAGAAGAGAGCGGGGAAGGCATCCTCTTCAGATGATGAAGGAGGGCCAAGAGCACTGGGAGGGGATGGCCACAGAGCGGAGGAGGCTAGCAAAGACAAAGAAG	GTCAAGAGTACCACCTTGTCCTCCACGGAGAGCACGGCGTCTGGAATGCAGGATGAGGTCAGAGCGGTTGGCGGGGAGCAAAGGTCAGAGGAGCCAAAGCGCAGGGTGGATACTTCAGTGTCTTGGGAGGCGTTGATTTGTGTCGGATCGTCCAAGAAGAGAGCGGGGAAGGCATCCTCTTCAGATGATGAAGGAGGGCCAAGAGCACTGGGAGGGGATGGCCACAGAGCGGAGGAGGCTAGCAAAGACAAAGAAG	1	4 Base Changes	VKSTTLSSTESTASGMQDEVRAVGGEQRSEEPKRRVDTSVSWEALICVGSSKKRAGKASSSDDEGGPRALGGDGHRAEEASKDKE	VKSATLSSTESTASGMQDEVRAVGEEQRSEEPKRRVDTSVSWEALICVGSSKKRARKASSSDDEGGPRTLGGDGHRAEEASKDKE
GTCAAGAGTACCACCTTGTCCTCCACGGAGAGCACGGCGTCTGGAATGCAGGATGAGGTCAGGGCGGTTGGCGAGGAGCAAAGGTCAGAGGAGCCAAAGCGCAGGGTGGATACTTCAGTGTCTTGGGAGGCGTTGATTTGTGTCGGATCGTCCAAGAAGAGAGCGAGGAAGGCATCCTCTTCAGATGATGAAGGAGGGCCAAGAACACTGGGAGGGGATGGCCACAGAGCGGAGGAGGCTAGCAAAGACAAAGAAG	GTCAAGAGTACCACCTTGTCCTCCACGGAGAGCACGGCGTCTGGAATGCAGGATGAGGTCAGGGCGGTTGGCGAGGAGCAAAGGTCAGAGGAGCCAAAGCGCAGGGTGGATACTTCAGTGTCTTGGGAGGCGTTGATTTGTGTCGGATCGTCCAAGAAGAGAGCGAGGAAGGCATCCTCTTCAGATGATGAAGGAGGGCCAAGAACACTGGGAGGGGATGGCCACAGAGCGGAGGAGGCTAGCAAAGACAAAGAAG	1	2 Base Changes	VKSTTLSSTESTASGMQDEVRAVGEEQRSEEPKRRVDTSVSWEALICVGSSKKRARKASSSDDEGGPRTLGGDGHRAEEASKDKE	VKSATLSSTESTASGMQDEVRAVGEEQRSEEPKRRVDTSVSWEALICVGSSKKRARKASSSDDEGGPRTLGGDGHRAEEASKDKE
GTCAAGAGTACCACCTTGTCCTCCACGGAGAGCACGGCGTCTGGAATGCAGGATGGGGTCAGAGCGGTTGGCGAGGAGCAAAGGTCAGAGGAGCCAAAGCGCAGGGTGGATACTTCAGTGTCTTGGGAGGCGTTGATTTGTGTCGGATCGTCCAAGAAGAGAGCGAGGAAGGCATCCTCTTCAGATGATGAAGGAGGGCCAAGAACACTGGGAGGGGATGGCCACAGAGCGGAGGAGGCTAGCAAAGACAAAGAAG	GTCAAGAGTACCACCTTGTCCTCCACGGAGAGCACGGCGTCTGGAATGCAGGATGGGGTCAGAGCGGTTGGCGAGGAGCAAAGGTCAGAGGAGCCAAAGCGCAGGGTGGATACTTCAGTGTCTTGGGAGGCGTTGATTTGTGTCGGATCGTCCAAGAAGAGAGCGAGGAAGGCATCCTCTTCAGATGATGAAGGAGGGCCAAGAACACTGGGAGGGGATGGCCACAGAGCGGAGGAGGCTAGCAAAGACAAAGAAG	1	2 Base Changes	VKSTTLSSTESTASGMQDGVRAVGEEQRSEEPKRRVDTSVSWEALICVGSSKKRARKASSSDDEGGPRTLGGDGHRAEEASKDKE	VKSATLSSTESTASGMQDEVRAVGEEQRSEEPKRRVDTSVSWEALICVGSSKKRARKASSSDDEGGPRTLGGDGHRAEEASKDKE
GTCAAGAGTACCACCTTGTCCTCCACGGAGAGCACGGCGTCTGGAATTGAGGATGAGGTCAGAGCGGTTGGCGAGGAGCAAAGGTCAGAGGAGCCAAAGCGCAGGGTGGATACTTCAGTGTCTTTGGAGGCGTTTATTTGTGTCGGATCGTCCAAGAAGAGAGCGAGGAAGGCATCCTCTTCAGATGATGAAGTAGGTCCAAGAACACTTGGAGGGTATGGCCACAGAGCGGAGGAGGCTAGCAAATACAAAGAAG	GTCAAGAGTACCACCTTGTCCTCCACGGAGAGCACGGCGTCTGGAATTGAGGATGAGGTCAGAGCGGTTGGCGAGGAGCAAAGGTCAGAGGAGCCAAAGCGCAGGGTGGATACTTCAGTGTCTTTGGAGGCGTTTATTTGTGTCGGATCGTCCAAGAAGAGAGCGAGGAAGGCATCCTCTTCAGATGATGAAGTAGGTCCAAGAACACTTGGAGGGTATGGCCACAGAGCGGAGGAGGCTAGCAAATACAAAGAAG	1	10 Base Changes	VKSTTLSSTESTASGIEDEVRAVGEEQRSEEPKRRVDTSVSLEAFICVGSSKKRARKASSSDDEVGPRTLGGYGHRAEEASKYKE	VKSATLSSTESTASGMQDEVRAVGEEQRSEEPKRRVDTSVSWEALICVGSSKKRARKASSSDDEGGPRTLGGDGHRAEEASKDKE
GTCAAGAGTCCCACCATGTCCTCCACGGAGAGCACGGCGTCTGGAATGCAGGATGAGGTCAGAGCGGTTGGCGAGGAGCATAGGTCAGAGGAGCCAAAGCGCAGGGTGGATACTTCAGTGTCTTGGGAGGCGTTGATTTGTGTCGGATCGTCCAAGAAGAGAGCGAGGAAGGCATCCTCTTCAGATGATGAAGGAGGGCCAAGAACACTGGGAGGGGATGGCCACAGAGCGGAGGAGGCTAGCAAAGACACAGAAG	GTCAAGAGTCCCACCATGTCCTCCACGGAGAGCACGGCGTCTGGAATGCAGGATGAGGTCAGAGCGGTTGGCGAGGAGCATAGGTCAGAGGAGCCAAAGCGCAGGGTGGATACTTCAGTGTCTTGGGAGGCGTTGATTTGTGTCGGATCGTCCAAGAAGAGAGCGAGGAAGGCATCCTCTTCAGATGATGAAGGAGGGCCAAGAACACTGGGAGGGGATGGCCACAGAGCGGAGGAGGCTAGCAAAGACACAGAAG	1	4 Base Changes	VKSPTMSSTESTASGMQDEVRAVGEEHRSEEPKRRVDTSVSWEALICVGSSKKRARKASSSDDEGGPRTLGGDGHRAEEASKDTE	VKSATLSSTESTASGMQDEVRAVGEEQRSEEPKRRVDTSVSWEALICVGSSKKRARKASSSDDEGGPRTLGGDGHRAEEASKDKE
GTCAAGAGTCCCACCTTGACCACCACGGAGAGCACGGCGTCTGGAATGCAGGATGAGGTCAGAGCGGTTGGCGAGGAGCAAAGGTCAGAGGAGCCAAAGCGCAGGGTGGATACTTCAGTGTCTTGGGAGGCGTTGATTTGTGTCGGATCGTCCAAGAAGAGAGCGAGGAAGGCATCCTCTTCAGATGATGAAGGAGGGCCAAGAAAACTGGGAGGGGATGGACACAGAGCGGAGGAGGCTAGCAAAGACAAAGAAG	GTCAAGAGTCCCACCTTGACCACCACGGAGAGCACGGCGTCTGGAATGCAGGATGAGGTCAGAGCGGTTGGCGAGGAGCAAAGGTCAGAGGAGCCAAAGCGCAGGGTGGATACTTCAGTGTCTTGGGAGGCGTTGATTTGTGTCGGATCGTCCAAGAAGAGAGCGAGGAAGGCATCCTCTTCAGATGATGAAGGAGGGCCAAGAAAACTGGGAGGGGATGGACACAGAGCGGAGGAGGCTAGCAAAGACAAAGAAG	1	5 Base Changes	VKSPTLTTTESTASGMQDEVRAVGEEQRSEEPKRRVDTSVSWEALICVGSSKKRARKASSSDDEGGPRKLGGDGHRAEEASKDKE	VKSATLSSTESTASGMQDEVRAVGEEQRSEEPKRRVDTSVSWEALICVGSSKKRARKASSSDDEGGPRTLGGDGHRAEEASKDKE
GTCAAGAGTCCCACCTTGTCCACCACGGAGAGCACGGCGTCTGGAATGCAGGATGAGGTCAGAGCGGTTGGCGAGGAGCAAAGGTCAGAGGAGCCAAAGCGCAGGGTGGATACTTCAGTGTCTTGGGAGGCGTTGATTTGTGTCGGATCGTCCAAGAAGAGAGCGAGGAAGGCATCCTCTTCAGATGATGAAGGAGGGCCAATAACACTGGGAGGGGATGGCCACAGAGCGGAGGAGGCTAGCAAAGACAAAGAAG	GTCAAGAGTCCCACCTTGTCCACCACGGAGAGCACGGCGTCTGGAATGCAGGATGAGGTCAGAGCGGTTGGCGAGGAGCAAAGGTCAGAGGAGCCAAAGCGCAGGGTGGATACTTCAGTGTCTTGGGAGGCGTTGATTTGTGTCGGATCGTCCAAGAAGAGAGCGAGGAAGGCATCCTCTTCAGATGATGAAGGAGGGCCAATAACACTGGGAGGGGATGGCCACAGAGCGGAGGAGGCTAGCAAAGACAAAGAAG	1	3 Base Changes	VKSPTLSTTESTASGMQDEVRAVGEEQRSEEPKRRVDTSVSWEALICVGSSKKRARKASSSDDEGGPITLGGDGHRAEEASKDKE	VKSATLSSTESTASGMQDEVRAVGEEQRSEEPKRRVDTSVSWEALICVGSSKKRARKASSSDDEGGPRTLGGDGHRAEEASKDKE
GTCAAGAGTCCCACCTTGTCCTACACGGAGAGCACGGCGTCTGTAATGCAGGATGAGGTCAGAGCGGTTTGCGAGGAGCAAATGTCAGAGGAGCCAAAGCGCAGGGTGGATACTTCAGTGTCTTGGGATGCGTTGATTTGTGTCGGATCGTCCAAGAAGAGAGCGAGGAAGGCATCCTCTTCAGATGATGAAGGAGGGCCAAGAACACTGGGAGGGGATGGCCACAGAGCGGAGGAGGCTAGCAAAGACAAAGAAG	GTCAAGAGTCCCACCTTGTCCTACACGGAGAGCACGGCGTCTGTAATGCAGGATGAGGTCAGAGCGGTTTGCGAGGAGCAAATGTCAGAGGAGCCAAAGCGCAGGGTGGATACTTCAGTGTCTTGGGATGCGTTGATTTGTGTCGGATCGTCCAAGAAGAGAGCGAGGAAGGCATCCTCTTCAGATGATGAAGGAGGGCCAAGAACACTGGGAGGGGATGGCCACAGAGCGGAGGAGGCTAGCAAAGACAAAGAAG	1	6 Base Changes	VKSPTLSYTESTASVMQDEVRAVCEEQMSEEPKRRVDTSVSWDALICVGSSKKRARKASSSDDEGGPRTLGGDGHRAEEASKDKE	VKSATLSSTESTASGMQDEVRAVGEEQRSEEPKRRVDTSVSWEALICVGSSKKRARKASSSDDEGGPRTLGGDGHRAEEASKDKE
GTCAAGAGTCCCACCTTGTCCTCCACGGAGAGCACGGCGTCAGGAATGCAGGATGAGGTCAGAGCGGTTGGCGGGGAGCAAAGGTCAGAGGAGCCAAAGCGCAGGGTGGATACTTCAGTGTCTTGGGAGGCGTTGATTTGTGTCGGATCGTCCAAGAAGAGAGCGAGGAAGGCATCCTCTTCAGATGATGAAGGAGGGCCAAGAACACTGGGAGGGGATGGCCACAGAGCGGAGGAGGCTAGCAAAGACAAAGAAG	GTCAAGAGTCCCACCTTGTCCTCCACGGAGAGCACGGCGTCAGGAATGCAGGATGAGGTCAGAGCGGTTGGCGGGGAGCAAAGGTCAGAGGAGCCAAAGCGCAGGGTGGATACTTCAGTGTCTTGGGAGGCGTTGATTTGTGTCGGATCGTCCAAGAAGAGAGCGAGGAAGGCATCCTCTTCAGATGATGAAGGAGGGCCAAGAACACTGGGAGGGGATGGCCACAGAGCGGAGGAGGCTAGCAAAGACAAAGAAG	1	3 Base Changes	VKSPTLSSTESTASGMQDEVRAVGGEQRSEEPKRRVDTSVSWEALICVGSSKKRARKASSSDDEGGPRTLGGDGHRAEEASKDKE	VKSATLSSTESTASGMQDEVRAVGEEQRSEEPKRRVDTSVSWEALICVGSSKKRARKASSSDDEGGPRTLGGDGHRAEEASKDKE
GTCAAGAGTCCCACCTTGTCCTCCACGGAGAGCACGGCGTCGGGAATGCAGGATGAGGTCAGAGCGGTTGGCGAGGAGCAAAGGTCAGAGGAGCCAAAGCGCAGGGTGGCTACTTCAGTGTCTTGGGAGGCGTTGATTTGTGTCGGATCGTCCAAGTAGAGAGCGAGGAAGGCATCCTCTTCAGATGATGAAGGAGGGCCAAGAACACTGGGAGGGGATGGCCACAGAGCGGAGGAGGCTAGCAAAGACAAAGAAG	GTCAAGAGTCCCACCTTGTCCTCCACGGAGAGCACGGCGTCGGGAATGCAGGATGAGGTCAGAGCGGTTGGCGAGGAGCAAAGGTCAGAGGAGCCAAAGCGCAGGGTGGCTACTTCAGTGTCTTGGGAGGCGTTGATTTGTGTCGGATCGTCCAAGTAGAGAGCGAGGAAGGCATCCTCTTCAGATGATGAAGGAGGGCCAAGAACACTGGGAGGGGATGGCCACAGAGCGGAGGAGGCTAGCAAAGACAAAGAAG	1	4 Base Changes	VKSPTLSSTESTASGMQDEVRAVGEEQRSEEPKRRVATSVSWEALICVGSSK*	VKSATLSSTESTASGMQDEVRAVGEEQRSEEPKRRVDTSVSWEALICVGSSKKRARKASSSDDEGGPRTLGGDGHRAEEASKDKE
GTCAAGAGTCCCACCTTGTCCTCCACGGAGAGCACGGCGTCTGGAATGCAGGACGAGGTCAGAGCGGTTGGCGAGGAGCAAAGGTCAGAGGAGCCAAAGCGCAGGGGGGATACTTCAGTGTCTTGGGAGGCGTTGAGTTGTGTCGGATCGTCCAAGAAGAGAGCGAGGAAGGCATCCTCTTCAGATGATGAAGGAGGGCCAAGAACACTGGGAGGGGATGGCCACAGAGCGGAGGAGGCTAGCAAAGACAAAGAAG	GTCAAGAGTCCCACCTTGTCCTCCACGGAGAGCACGGCGTCTGGAATGCAGGACGAGGTCAGAGCGGTTGGCGAGGAGCAAAGGTCAGAGGAGCCAAAGCGCAGGGGGGATACTTCAGTGTCTTGGGAGGCGTTGAGTTGTGTCGGATCGTCCAAGAAGAGAGCGAGGAAGGCATCCTCTTCAGATGATGAAGGAGGGCCAAGAACACTGGGAGGGGATGGCCACAGAGCGGAGGAGGCTAGCAAAGACAAAGAAG	1	4 Base Changes	VKSPTLSSTESTASGMQDEVRAVGEEQRSEEPKRRGDTSVSWEALSCVGSSKKRARKASSSDDEGGPRTLGGDGHRAEEASKDKE	VKSATLSSTESTASGMQDEVRAVGEEQRSEEPKRRVDTSVSWEALICVGSSKKRARKASSSDDEGGPRTLGGDGHRAEEASKDKE
GTCAAGAGTCCCACCTTGTCCTCCACGGAGAGCACGGCGTCTGGAATGCAGGATGAGGTCAGAGCGGTTGGCGAGGAGCAAAGGTCAGAGGAGCCAAAGCGCAGGGTGGATACTTCAGTGTCTTGGAAGGCGTTGATTTGTGTCGGATCGTCCAAGAAGAGAGCGAGGAAGGCATCCTCTTCAGATGATGAAGGAGGGCCAAGAACACTGGGAGGGGATGGCCACAGAGCGGAGGAGGCTAGCAAAGACAAAGAAG	GTCAAGAGTCCCACCTTGTCCTCCACGGAGAGCACGGCGTCTGGAATGCAGGATGAGGTCAGAGCGGTTGGCGAGGAGCAAAGGTCAGAGGAGCCAAAGCGCAGGGTGGATACTTCAGTGTCTTGGAAGGCGTTGATTTGTGTCGGATCGTCCAAGAAGAGAGCGAGGAAGGCATCCTCTTCAGATGATGAAGGAGGGCCAAGAACACTGGGAGGGGATGGCCACAGAGCGGAGGAGGCTAGCAAAGACAAAGAAG	1	2 Base Changes	VKSPTLSSTESTASGMQDEVRAVGEEQRSEEPKRRVDTSVSWKALICVGSSKKRARKASSSDDEGGPRTLGGDGHRAEEASKDKE	VKSATLSSTESTASGMQDEVRAVGEEQRSEEPKRRVDTSVSWEALICVGSSKKRARKASSSDDEGGPRTLGGDGHRAEEASKDKE
GTCAAGAGTCCCACCTTGTCCTCCACGGAGAGCACGGCGTCTGGAATGCAGGATGAGGTCAGAGCGGTTGGCGAGGAGCAAAGGTCAGAGGAGCCAAAGCGCAGGGTGGATACTTCAGTGTCTTGGGAGGCGTTGATTTGTGTCGGATCGTCCAAGAAGAGAGCGAGGAAGGCATCCTCTTCAGATGATGAAGGAGGGCCAAGAACACTGGGAGGGGATGGCCACAGAGCGGAGGAGGCTAGCAGAGACAAAGAAG	GTCAAGAGTCCCACCTTGTCCTCCACGGAGAGCACGGCGTCTGGAATGCAGGATGAGGTCAGAGCGGTTGGCGAGGAGCAAAGGTCAGAGGAGCCAAAGCGCAGGGTGGATACTTCAGTGTCTTGGGAGGCGTTGATTTGTGTCGGATCGTCCAAGAAGAGAGCGAGGAAGGCATCCTCTTCAGATGATGAAGGAGGGCCAAGAACACTGGGAGGGGATGGCCACAGAGCGGAGGAGGCTAGCAGAGACAAAGAAG	1	2 Base Changes	VKSPTLSSTESTASGMQDEVRAVGEEQRSEEPKRRVDTSVSWEALICVGSSKKRARKASSSDDEGGPRTLGGDGHRAEEASRDKE	VKSATLSSTESTASGMQDEVRAVGEEQRSEEPKRRVDTSVSWEALICVGSSKKRARKASSSDDEGGPRTLGGDGHRAEEASKDKE
GTCAAGAGTCCCACCTTGTCCTCCACGGAGAGCACGGCGTCTGGAATGCAGGATGAGGTCAGAGCGGTTGGCGAGGAGCAAAGGTCAGAGGAGCCAAAGCGCAGGGTGGATACTTCAGTGTCTTGGGAGGCGTTGATTTGTGTCGGATCGTCCAAGAAGAGAGCGAGGAAGGCATCCTCTTCAGATGATGAAGGAGGGCCAAGAACACTGGGAGGGGATGGCCACAGAGCGGGGGAGGCTAGCAAAGACAAAGAAG	GTCAAGAGTCCCACCTTGTCCTCCACGGAGAGCACGGCGTCTGGAATGCAGGATGAGGTCAGAGCGGTTGGCGAGGAGCAAAGGTCAGAGGAGCCAAAGCGCAGGGTGGATACTTCAGTGTCTTGGGAGGCGTTGATTTGTGTCGGATCGTCCAAGAAGAGAGCGAGGAAGGCATCCTCTTCAGATGATGAAGGAGGGCCAAGAACACTGGGAGGGGATGGCCACAGAGCGGGGGAGGCTAGCAAAGACAAAGAAG	1	2 Base Changes	VKSPTLSSTESTASGMQDEVRAVGEEQRSEEPKRRVDTSVSWEALICVGSSKKRARKASSSDDEGGPRTLGGDGHRAGEASKDKE	VKSATLSSTESTASGMQDEVRAVGEEQRSEEPKRRVDTSVSWEALICVGSSKKRARKASSSDDEGGPRTLGGDGHRAEEASKDKE
GTCAAGAGTCCCACCTTGTCCTCCACGGAGAGCACGGCGTCTGGAATGCAGGATGAGGTCAGAGCGGTTGGCGAGGAGCAAAGGTCAGAGGAGCCAAAGCGCAGGGTGGATACTTCAGTGTCTTGGGAGGCGTTGATTTGTGTCGGATCGTCCAAGAAGAGAGCGAGGAAGGCATCCTCTTCAGATGATGAAGGAGGGCCAAGAACACTGGGAGGGGATGGCCACAGGGCGGAGGAGGCTAGCAAAGACAAAGAAG	GTCAAGAGTCCCACCTTGTCCTCCACGGAGAGCACGGCGTCTGGAATGCAGGATGAGGTCAGAGCGGTTGGCGAGGAGCAAAGGTCAGAGGAGCCAAAGCGCAGGGTGGATACTTCAGTGTCTTGGGAGGCGTTGATTTGTGTCGGATCGTCCAAGAAGAGAGCGAGGAAGGCATCCTCTTCAGATGATGAAGGAGGGCCAAGAACACTGGGAGGGGATGGCCACAGGGCGGAGGAGGCTAGCAAAGACAAAGAAG	1	2 Base Changes	VKSPTLSSTESTASGMQDEVRAVGEEQRSEEPKRRVDTSVSWEALICVGSSKKRARKASSSDDEGGPRTLGGDGHRAEEASKDKE	VKSATLSSTESTASGMQDEVRAVGEEQRSEEPKRRVDTSVSWEALICVGSSKKRARKASSSDDEGGPRTLGGDGHRAEEASKDKE
GTCAAGAGTCCCACCTTGTCCTCCACGGAGAGCACGGCGTCTGGAATGCAGGATGAGGTCAGAGCGGTTGGCGAGGAGCAAAGGTCAGAGGAGCCAAAGCGCAGGGTGGATACTTCAGTGTCTTGGGAGGCGTTGATTTGTGTCGGATCGTCCAAGAAGAGAGCGAGGAAGGCATCCTCTTCAGATGATGAAGGAGGGCCTAGAACACTGGGAGGGGATGGCCACAGAGCGGAGGAGGCTAGCAAAGACAAAGAAG	GTCAAGAGTCCCACCTTGTCCTCCACGGAGAGCACGGCGTCTGGAATGCAGGATGAGGTCAGAGCGGTTGGCGAGGAGCAAAGGTCAGAGGAGCCAAAGCGCAGGGTGGATACTTCAGTGTCTTGGGAGGCGTTGATTTGTGTCGGATCGTCCAAGAAGAGAGCGAGGAAGGCATCCTCTTCAGATGATGAAGGAGGGCCTAGAACACTGGGAGGGGATGGCCACAGAGCGGAGGAGGCTAGCAAAGACAAAGAAG	1	2 Base Changes	VKSPTLSSTESTASGMQDEVRAVGEEQRSEEPKRRVDTSVSWEALICVGSSKKRARKASSSDDEGGPRTLGGDGHRAEEASKDKE	VKSATLSSTESTASGMQDEVRAVGEEQRSEEPKRRVDTSVSWEALICVGSSKKRARKASSSDDEGGPRTLGGDGHRAEEASKDKE
GTCAAGAGTCCCACCTTGTCCTCCACGGAGAGCACGGCGTCTGGAATGCAGGATGAGGTCAGAGCGGTTGGCGAGGAGCAAAGGTCAGAGGAGCCAAAGCGCAGGGTGGATACTTCATTGTCTTGGGAGGCGTTGATTTGTGTCGGATCGTCCAAGAAGAGAGCGAGGAAGGCATCCTCTTCAGATGATTAAGGAGGGCCAAGAACACTGGGAGGGGATGGCCACAGAGCGGAGGAGGCTAGCAAAGACAAAGAAG	GTCAAGAGTCCCACCTTGTCCTCCACGGAGAGCACGGCGTCTGGAATGCAGGATGAGGTCAGAGCGGTTGGCGAGGAGCAAAGGTCAGAGGAGCCAAAGCGCAGGGTGGATACTTCATTGTCTTGGGAGGCGTTGATTTGTGTCGGATCGTCCAAGAAGAGAGCGAGGAAGGCATCCTCTTCAGATGATTAAGGAGGGCCAAGAACACTGGGAGGGGATGGCCACAGAGCGGAGGAGGCTAGCAAAGACAAAGAAG	1	3 Base Changes	VKSPTLSSTESTASGMQDEVRAVGEEQRSEEPKRRVDTSLSWEALICVGSSKKRARKASSSDD*	VKSATLSSTESTASGMQDEVRAVGEEQRSEEPKRRVDTSVSWEALICVGSSKKRARKASSSDDEGGPRTLGGDGHRAEEASKDKE
GTCAAGAGTCCCACCTTGTCCTCCACGGAGAGCACGGCGTCTGGAATGCAGGGTGAGGTCAGAGCGGTTGGCGAGGAGCAAAGGTCAGAGGAGCCAAAGCGCAGGGTGGATACTTCAGTGTCTTGGGAGGCGTTGATTTGTGTCGGATCGTCCAAGAAGAGAGCGAGGAAGGCATCCTCTTCAGATGATGAAGGAGGGCCAAGAACATTGGGAGGGGATGGCCACAGAGCGGAGGAGGCTAGCAAAGACAAAGAAG	GTCAAGAGTCCCACCTTGTCCTCCACGGAGAGCACGGCGTCTGGAATGCAGGGTGAGGTCAGAGCGGTTGGCGAGGAGCAAAGGTCAGAGGAGCCAAAGCGCAGGGTGGATACTTCAGTGTCTTGGGAGGCGTTGATTTGTGTCGGATCGTCCAAGAAGAGAGCGAGGAAGGCATCCTCTTCAGATGATGAAGGAGGGCCAAGAACATTGGGAGGGGATGGCCACAGAGCGGAGGAGGCTAGCAAAGACAAAGAAG	1	3 Base Changes	VKSPTLSSTESTASGMQGEVRAVGEEQRSEEPKRRVDTSVSWEALICVGSSKKRARKASSSDDEGGPRTLGGDGHRAEEASKDKE	VKSATLSSTESTASGMQDEVRAVGEEQRSEEPKRRVDTSVSWEALICVGSSKKRARKASSSDDEGGPRTLGGDGHRAEEASKDKE
GTCAAGAGTCCCACCTTGTCCTCCACGGAGAGCACGGCGTCTGGAATGCGGGATGAGGTCAGAGCGGTTGGCGAGGAGCAAAGGTCAGAGGAGCCAAAGCGCAGGGTGGATACTTCAGTGTCTTGGGAGGCGTTGATTTGTGTCGGATCGTCCAAGAAGAGAGCGAGGAAGGCATCCTCTTCAGATGATGAAGGAGGGCCAAGAACACTGGGAGGGGATGGCCACAGAGCGGAGGAGGCTAGCAAAGACAAAGAAG	GTCAAGAGTCCCACCTTGTCCTCCACGGAGAGCACGGCGTCTGGAATGCGGGATGAGGTCAGAGCGGTTGGCGAGGAGCAAAGGTCAGAGGAGCCAAAGCGCAGGGTGGATACTTCAGTGTCTTGGGAGGCGTTGATTTGTGTCGGATCGTCCAAGAAGAGAGCGAGGAAGGCATCCTCTTCAGATGATGAAGGAGGGCCAAGAACACTGGGAGGGGATGGCCACAGAGCGGAGGAGGCTAGCAAAGACAAAGAAG	1	2 Base Changes	VKSPTLSSTESTASGMRDEVRAVGEEQRSEEPKRRVDTSVSWEALICVGSSKKRARKASSSDDEGGPRTLGGDGHRAEEASKDKE	VKSATLSSTESTASGMQDEVRAVGEEQRSEEPKRRVDTSVSWEALICVGSSKKRARKASSSDDEGGPRTLGGDGHRAEEASKDKE
GTCAAGAGTCCCACCTTGTCCTCCACGGAGAGCACGGCGTCTGGCATGCAGGATGAGGTCAGAGCGGTTGGCGAGGAGCAAAGGTCAGAGGAGCCAAAGCGCAGGGTGGATACTTCAGTGTCTTGGGAGGCGTTGATTTGTGTCGGATCGTCCAAGAAGAGAGCGAGGAAGGCATCCTCTTCAGATGATGAAGGAGGGCCAAGAACACTGGGAGGGGATGGCCACAGAGCGGAGGAGGCTAGCAAAGACAAAGAAG	GTCAAGAGTCCCACCTTGTCCTCCACGGAGAGCACGGCGTCTGGCATGCAGGATGAGGTCAGAGCGGTTGGCGAGGAGCAAAGGTCAGAGGAGCCAAAGCGCAGGGTGGATACTTCAGTGTCTTGGGAGGCGTTGATTTGTGTCGGATCGTCCAAGAAGAGAGCGAGGAAGGCATCCTCTTCAGATGATGAAGGAGGGCCAAGAACACTGGGAGGGGATGGCCACAGAGCGGAGGAGGCTAGCAAAGACAAAGAAG	1	2 Base Changes	VKSPTLSSTESTASGMQDEVRAVGEEQRSEEPKRRVDTSVSWEALICVGSSKKRARKASSSDDEGGPRTLGGDGHRAEEASKDKE	VKSATLSSTESTASGMQDEVRAVGEEQRSEEPKRRVDTSVSWEALICVGSSKKRARKASSSDDEGGPRTLGGDGHRAEEASKDKE
GTCAAGAGTCCCACCTTGTCCTCCACGGAGAGCGCGGCGTCTGGAATGCAGGATGAGGTCAGAGCGGTTGGCGAGGAGCAAAGGTCAGAGGAGCCAAAGCGCAGGGTGGATACTTCAGTGTCTTGGGAGGCGTTGATTTGTGTCGGATCGTCCAAGAAGAGAGCGAGGAAGGCATCCTCTTCAGATGATGAAGGAGTGCCAAGAACACTGGGAGGGGATGGCCACAGAGCGGAGGAGGCTAGCAAAGACAAAGAAG	GTCAAGAGTCCCACCTTGTCCTCCACGGAGAGCGCGGCGTCTGGAATGCAGGATGAGGTCAGAGCGGTTGGCGAGGAGCAAAGGTCAGAGGAGCCAAAGCGCAGGGTGGATACTTCAGTGTCTTGGGAGGCGTTGATTTGTGTCGGATCGTCCAAGAAGAGAGCGAGGAAGGCATCCTCTTCAGATGATGAAGGAGTGCCAAGAACACTGGGAGGGGATGGCCACAGAGCGGAGGAGGCTAGCAAAGACAAAGAAG	1	3 Base Changes	VKSPTLSSTESAASGMQDEVRAVGEEQRSEEPKRRVDTSVSWEALICVGSSKKRARKASSSDDEGVPRTLGGDGHRAEEASKDKE	VKSATLSSTESTASGMQDEVRAVGEEQRSEEPKRRVDTSVSWEALICVGSSKKRARKASSSDDEGGPRTLGGDGHRAEEASKDKE
GTCAAGAGTGAAACCTTGTCCTCCACGGAGAGCACGGCGTCTGGAATGCAGGATGAGGTCAGAGCGGTTGGCGAGGAGCAAAGGTCAGAGGAGCCAAAGCGCAGGGTGGATACTTCAGTGTCTTGGGAGGCGTTGATTTGTGTCGGATCGTCCAAGAAGAGAGCGAGGAAGGCATCCTCTTCAGATGATGAAGGAGGGCCAAGAACACTGGGAGGGGATGGCCACAGAGCGGAGGAGGCTAGCAAAGACAAAGAAG	GTCAAGAGTGAAACCTTGTCCTCCACGGAGAGCACGGCGTCTGGAATGCAGGATGAGGTCAGAGCGGTTGGCGAGGAGCAAAGGTCAGAGGAGCCAAAGCGCAGGGTGGATACTTCAGTGTCTTGGGAGGCGTTGATTTGTGTCGGATCGTCCAAGAAGAGAGCGAGGAAGGCATCCTCTTCAGATGATGAAGGAGGGCCAAGAACACTGGGAGGGGATGGCCACAGAGCGGAGGAGGCTAGCAAAGACAAAGAAG	1	2 Base Changes	VKSETLSSTESTASGMQDEVRAVGEEQRSEEPKRRVDTSVSWEALICVGSSKKRARKASSSDDEGGPRTLGGDGHRAEEASKDKE	VKSATLSSTESTASGMQDEVRAVGEEQRSEEPKRRVDTSVSWEALICVGSSKKRARKASSSDDEGGPRTLGGDGHRAEEASKDKE
GTCAAGAGTGACAACTTTTCCTCAACGGAGAGCTCGGCGTCTTGAATGCATGATGAGGTCAGAGCGGTTGGCGATGAGAAAAGGTCAGAGGAGCCAAAGCGCAGTGTGGATACTTCAGTGTCTTGGTATGCGTTGATTTGTGTCGGATCGTCCAAGAAGATAGAGAGGAAGGCATCCTCTTCAGATGATGAAGGGGGGCCAAGGACACTGGGAGGGGATGGCCACAGAGCGGAGGAGGCTAGCAAAGACAAAGAAG	GTCAAGAGTGACAACTTTTCCTCAACGGAGAGCTCGGCGTCTTGAATGCATGATGAGGTCAGAGCGGTTGGCGATGAGAAAAGGTCAGAGGAGCCAAAGCGCAGTGTGGATACTTCAGTGTCTTGGTATGCGTTGATTTGTGTCGGATCGTCCAAGAAGATAGAGAGGAAGGCATCCTCTTCAGATGATGAAGGGGGGCCAAGGACACTGGGAGGGGATGGCCACAGAGCGGAGGAGGCTAGCAAAGACAAAGAAG	1	16 Base Changes	VKSDNFSSTESSAS*	VKSATLSSTESTASGMQDEVRAVGEEQRSEEPKRRVDTSVSWEALICVGSSKKRARKASSSDDEGGPRTLGGDGHRAEEASKDKE
GTCAAGAGTGACACATAGTCCTCCACGGAGAGCACGGCGTCTGGAATGCAGGATGAGGTCAGTTCGGTTGGCGAGGAGCAAAGGTCAGAGGAGCCAAAGCGAAGGGTGGATACTTCAGTGTCTTGGGAGGCGTTGATTTGTGTCGGATCGTCAAACAAGAGAGCGAGGAAGGCATCCTCTTCATATGATGAAGGAGGGCCAAGAACACTGGGAGGGGATGGCCACATAGCGGAGGAGGCTAGCAAAGACAAAGAAG	GTCAAGAGTGACACATAGTCCTCCACGGAGAGCACGGCGTCTGGAATGCAGGATGAGGTCAGTTCGGTTGGCGAGGAGCAAAGGTCAGAGGAGCCAAAGCGAAGGGTGGATACTTCAGTGTCTTGGGAGGCGTTGATTTGTGTCGGATCGTCAAACAAGAGAGCGAGGAAGGCATCCTCTTCATATGATGAAGGAGGGCCAAGAACACTGGGAGGGGATGGCCACATAGCGGAGGAGGCTAGCAAAGACAAAGAAG	1	10 Base Changes	VKSDT*	VKSATLSSTESTASGMQDEVRAVGEEQRSEEPKRRVDTSVSWEALICVGSSKKRARKASSSDDEGGPRTLGGDGHRAEEASKDKE
GTCAAGAGTGACACATTGTACTCAACGGAGAGCACGGCGTCTGGAATGCAGGCTGAGGTCAGAGCGGTTGGCGAGGAGCAAAGGTCAGAGGAGCAAAAGCGCAGGGTGGATACTTCAGTGTCTTGGGAGGCGTTGATTTGTGTCGGATCGTCCAAGAAGAGAGCGAGGAAGGCATCCTCTTCAGATGATGAAGGAGGGCCAAGAACACTGGGTGGGGATGGCCACAGAGCGGAGGAGGCTAGCAAAGACAAAGAAG	GTCAAGAGTGACACATTGTACTCAACGGAGAGCACGGCGTCTGGAATGCAGGCTGAGGTCAGAGCGGTTGGCGAGGAGCAAAGGTCAGAGGAGCAAAAGCGCAGGGTGGATACTTCAGTGTCTTGGGAGGCGTTGATTTGTGTCGGATCGTCCAAGAAGAGAGCGAGGAAGGCATCCTCTTCAGATGATGAAGGAGGGCCAAGAACACTGGGTGGGGATGGCCACAGAGCGGAGGAGGCTAGCAAAGACAAAGAAG	1	7 Base Changes	VKSDTLYSTESTASGMQAEVRAVGEEQRSEEQKRRVDTSVSWEALICVGSSKKRARKASSSDDEGGPRTLGGDGHRAEEASKDKE	VKSATLSSTESTASGMQDEVRAVGEEQRSEEPKRRVDTSVSWEALICVGSSKKRARKASSSDDEGGPRTLGGDGHRAEEASKDKE
GTCAAGAGTGACACCATGTCCTCCACGGAGAGCACGGCGTCTGGAATGCAGGATGAGGTCAGAGCGGTTGGCGAGGAGCAAAGGTCAGAGGAGCCAAAGCGCAGGGTGGATACTTCAGTGTCTTGGGAGGCGTTGATTTGTGTCGGATCGTCCAAGAAGAGAGAGAGGAAGGCATCCTCTTCAGATGATGAAGGAGGGCCAAGAACACTGGGAGGGGATGGCCACAGAGCGGAGGAGGCTAGCAAAGACAAAGAAG	GTCAAGAGTGACACCATGTCCTCCACGGAGAGCACGGCGTCTGGAATGCAGGATGAGGTCAGAGCGGTTGGCGAGGAGCAAAGGTCAGAGGAGCCAAAGCGCAGGGTGGATACTTCAGTGTCTTGGGAGGCGTTGATTTGTGTCGGATCGTCCAAGAAGAGAGAGAGGAAGGCATCCTCTTCAGATGATGAAGGAGGGCCAAGAACACTGGGAGGGGATGGCCACAGAGCGGAGGAGGCTAGCAAAGACAAAGAAG	1	3 Base Changes	VKSDTMSSTESTASGMQDEVRAVGEEQRSEEPKRRVDTSVSWEALICVGSSKKRERKASSSDDEGGPRTLGGDGHRAEEASKDKE	VKSATLSSTESTASGMQDEVRAVGEEQRSEEPKRRVDTSVSWEALICVGSSKKRARKASSSDDEGGPRTLGGDGHRAEEASKDKE
GTCAAGAGTGACACCCTGTCCTCCACGGAGAGCACGTCGTCTGGAATGCAGGATGAGGTCAGAGCGGTTGGCGAGGAGCAAAGGTCAGAGGAGCCAAAGCGCAGGGTGGATACTTCAGTGTCTTGGGAGGCGTTGATTTGTGTCGGATCGTCCAAGAAGAGAGCGAGGAAGGCATCCTCTTCAGATGATGAAGGAGGGCCAAGAACACTGGGAGGGGATGGCCACAGAGCGGAGGAGGCTAGCAAAGACAAAGAAG	GTCAAGAGTGACACCCTGTCCTCCACGGAGAGCACGTCGTCTGGAATGCAGGATGAGGTCAGAGCGGTTGGCGAGGAGCAAAGGTCAGAGGAGCCAAAGCGCAGGGTGGATACTTCAGTGTCTTGGGAGGCGTTGATTTGTGTCGGATCGTCCAAGAAGAGAGCGAGGAAGGCATCCTCTTCAGATGATGAAGGAGGGCCAAGAACACTGGGAGGGGATGGCCACAGAGCGGAGGAGGCTAGCAAAGACAAAGAAG	1	3 Base Changes	VKSDTLSSTESTSSGMQDEVRAVGEEQRSEEPKRRVDTSVSWEALICVGSSKKRARKASSSDDEGGPRTLGGDGHRAEEASKDKE	VKSATLSSTESTASGMQDEVRAVGEEQRSEEPKRRVDTSVSWEALICVGSSKKRARKASSSDDEGGPRTLGGDGHRAEEASKDKE
GTCAAGAGTGACACCTTGACCTCAACGGAGAGCACGGCGTCTGGAATGCAGGATGAGGTCAGAGCGGTTGGCGAGGAGCAAAGGTCAGAGGAGCCAAAGCGCAGGGTGGATACTTCAGTGTCTTGGGAGGCGTTGATTTGTGTCGGATCGTCCAAGAAGAGAGCGAGGAAGGCATCCTCTTCAGATGATGAAGGAGGGCCAAGAACACTGGGAGGGGATGGCCACAGAGCGGAGGAGGCTAGCAAAGACAAAGAAG	GTCAAGAGTGACACCTTGACCTCAACGGAGAGCACGGCGTCTGGAATGCAGGATGAGGTCAGAGCGGTTGGCGAGGAGCAAAGGTCAGAGGAGCCAAAGCGCAGGGTGGATACTTCAGTGTCTTGGGAGGCGTTGATTTGTGTCGGATCGTCCAAGAAGAGAGCGAGGAAGGCATCCTCTTCAGATGATGAAGGAGGGCCAAGAACACTGGGAGGGGATGGCCACAGAGCGGAGGAGGCTAGCAAAGACAAAGAAG	1	3 Base Changes	VKSDTLTSTESTASGMQDEVRAVGEEQRSEEPKRRVDTSVSWEALICVGSSKKRARKASSSDDEGGPRTLGGDGHRAEEASKDKE	VKSATLSSTESTASGMQDEVRAVGEEQRSEEPKRRVDTSVSWEALICVGSSKKRARKASSSDDEGGPRTLGGDGHRAEEASKDKE
GTCAAGAGTGACACCTTGACCTCCACGGAGAGCACGGCGTCTGGAATGCAGGATGAGGTCAGAGCGGTTGGCGAGGAGCAAAGGTCAGAGGAGCCAAAGCGCAGGGTGGATACTTCAGTGTCTTGGGAGGCGTTGATTTGTGTCGGATCGTCCAAGAAGAGAGCGAGGAAGGCATCCTCTTCAGATGATGAAGGAGGGCCAAGAACACTGGGAGGGGATGGCCACAGAGCGGAGGAGGCTAGCAAAGACAAAGAAG	GTCAAGAGTGACACCTTGACCTCCACGGAGAGCACGGCGTCTGGAATGCAGGATGAGGTCAGAGCGGTTGGCGAGGAGCAAAGGTCAGAGGAGCCAAAGCGCAGGGTGGATACTTCAGTGTCTTGGGAGGCGTTGATTTGTGTCGGATCGTCCAAGAAGAGAGCGAGGAAGGCATCCTCTTCAGATGATGAAGGAGGGCCAAGAACACTGGGAGGGGATGGCCACAGAGCGGAGGAGGCTAGCAAAGACAAAGAAG	1	2 Base Changes	VKSDTLTSTESTASGMQDEVRAVGEEQRSEEPKRRVDTSVSWEALICVGSSKKRARKASSSDDEGGPRTLGGDGHRAEEASKDKE	VKSATLSSTESTASGMQDEVRAVGEEQRSEEPKRRVDTSVSWEALICVGSSKKRARKASSSDDEGGPRTLGGDGHRAEEASKDKE
GTCAAGAGTGACACCTTGTCATCCACGGAGAGCACGGCGTCTGGAATGCAGGATGAGGTCAGAGCGGTTGGCGAGGAGCAAAGGTCAGAGGATCCAAAGCGCAGGGTGGATACTTCAGTGTCTTGGGAGGCGTTGATTTGTGTCGGATCGTCCAAGAAGAGAGCGAGGAAGGCATCCTCTTCAGATGATGAAGGAGGGCCAAGAACACTGGGAGGGGATGGCCACAGAGCGGAGGAGGCTAGCAAAGACAAAGAAG	GTCAAGAGTGACACCTTGTCATCCACGGAGAGCACGGCGTCTGGAATGCAGGATGAGGTCAGAGCGGTTGGCGAGGAGCAAAGGTCAGAGGATCCAAAGCGCAGGGTGGATACTTCAGTGTCTTGGGAGGCGTTGATTTGTGTCGGATCGTCCAAGAAGAGAGCGAGGAAGGCATCCTCTTCAGATGATGAAGGAGGGCCAAGAACACTGGGAGGGGATGGCCACAGAGCGGAGGAGGCTAGCAAAGACAAAGAAG	1	3 Base Changes	VKSDTLSSTESTASGMQDEVRAVGEEQRSEDPKRRVDTSVSWEALICVGSSKKRARKASSSDDEGGPRTLGGDGHRAEEASKDKE	VKSATLSSTESTASGMQDEVRAVGEEQRSEEPKRRVDTSVSWEALICVGSSKKRARKASSSDDEGGPRTLGGDGHRAEEASKDKE
GTCAAGAGTGACACCTTGTCATCCACGGAGAGCACGTCGTCTGGAATGCAGGATGAGGTCAGAGCGGTTGGCGAGGAGCAAAGGTAAGAGGAGCCAAAGCGCAGGGTGGATAATTCAGTGTCTTGGGATGCGTTGTTTTGTGTCGGATCGTCCAATAAGAGAGCGAGGAAGGCATCCTCTTCAGATGATGAAGGAGGGCCAAGAACACTGGGAGGGGATGGCCACAGAGCGGAGGAGGCTAGCAAAGAAAAAGAAG	GTCAAGAGTGACACCTTGTCATCCACGGAGAGCACGTCGTCTGGAATGCAGGATGAGGTCAGAGCGGTTGGCGAGGAGCAAAGGTAAGAGGAGCCAAAGCGCAGGGTGGATAATTCAGTGTCTTGGGATGCGTTGTTTTGTGTCGGATCGTCCAATAAGAGAGCGAGGAAGGCATCCTCTTCAGATGATGAAGGAGGGCCAAGAACACTGGGAGGGGATGGCCACAGAGCGGAGGAGGCTAGCAAAGAAAAAGAAG	1	9 Base Changes	VKSDTLSSTESTSSGMQDEVRAVGEEQR*	VKSATLSSTESTASGMQDEVRAVGEEQRSEEPKRRVDTSVSWEALICVGSSKKRARKASSSDDEGGPRTLGGDGHRAEEASKDKE
GTCAAGAGTGACACCTTGTCATCCACGGAGATCACGGCGTCTGGAATGCAGGATGAGGTCAGAGCGGTTGGCGAGGAGCAAAGGTCAGAGGAGCCAAAGCGCAGGGTGGATACTTCAGTGTCTTGGGAGGAGTTGATTTGTGTCGGATCGTCCAAGAAGAGAGCGAGGAAGGCATCCTCTTCAGATGATGAAGGAGGGCCAAGAACACTGGGAGGGGATGGCCACAGAGCGGAGTAGGCTAGCAAAGACAAAGAAG	GTCAAGAGTGACACCTTGTCATCCACGGAGATCACGGCGTCTGGAATGCAGGATGAGGTCAGAGCGGTTGGCGAGGAGCAAAGGTCAGAGGAGCCAAAGCGCAGGGTGGATACTTCAGTGTCTTGGGAGGAGTTGATTTGTGTCGGATCGTCCAAGAAGAGAGCGAGGAAGGCATCCTCTTCAGATGATGAAGGAGGGCCAAGAACACTGGGAGGGGATGGCCACAGAGCGGAGTAGGCTAGCAAAGACAAAGAAG	1	5 Base Changes	VKSDTLSSTEITASGMQDEVRAVGEEQRSEEPKRRVDTSVSWEELICVGSSKKRARKASSSDDEGGPRTLGGDGHRAE*	VKSATLSSTESTASGMQDEVRAVGEEQRSEEPKRRVDTSVSWEALICVGSSKKRARKASSSDDEGGPRTLGGDGHRAEEASKDKE
GTCAAGAGTGACACCTTGTCCACCACGGAGAGCACGGCGTCTGGAATGCAGGATGAGGTCAGAGCGGTTGGCGAGGAGCAAAGGTCAGAGGAGCCAAAGCGCAGGGTGGATACTTCAGTGTCTTGGGAGGCGTTGATTTGTGTCGGATCGTCCAAGAAGAGAGCGAGGAAGGCATCCTCTTCAGATGATGAAGGAGGGCCAAGAACACTGGGAGGGGATGGCCACAGAGCGGAGGAGGCTAGCAAAGACTAAGAAG	GTCAAGAGTGACACCTTGTCCACCACGGAGAGCACGGCGTCTGGAATGCAGGATGAGGTCAGAGCGGTTGGCGAGGAGCAAAGGTCAGAGGAGCCAAAGCGCAGGGTGGATACTTCAGTGTCTTGGGAGGCGTTGATTTGTGTCGGATCGTCCAAGAAGAGAGCGAGGAAGGCATCCTCTTCAGATGATGAAGGAGGGCCAAGAACACTGGGAGGGGATGGCCACAGAGCGGAGGAGGCTAGCAAAGACTAAGAAG	1	3 Base Changes	VKSDTLSTTESTASGMQDEVRAVGEEQRSEEPKRRVDTSVSWEALICVGSSKKRARKASSSDDEGGPRTLGGDGHRAEEASKD*	VKSATLSSTESTASGMQDEVRAVGEEQRSEEPKRRVDTSVSWEALICVGSSKKRARKASSSDDEGGPRTLGGDGHRAEEASKDKE
GTCAAGAGTGACACCTTGTCCTCCACGGAAGGCACGGCGTCTGGAATGCAGGATGAGGTCAGAGCGGTTGGCGAGGAGCAAAGGTCAGAGGAGCCAAAGCGCAGGGTGGATACTTCAGTGTCTTGGGAGGCGTTGATTTGTGTCGGATCGTCCAAGAAGAGAGCGAGGAAGGCATCCTCTTCAGATGATGAAGGAGGGCCAAGAACACTGGGAGGGGATGGCCACAGAGCGGAGGAGGCTAGCAAAGACAAAGAAG	GTCAAGAGTGACACCTTGTCCTCCACGGAAGGCACGGCGTCTGGAATGCAGGATGAGGTCAGAGCGGTTGGCGAGGAGCAAAGGTCAGAGGAGCCAAAGCGCAGGGTGGATACTTCAGTGTCTTGGGAGGCGTTGATTTGTGTCGGATCGTCCAAGAAGAGAGCGAGGAAGGCATCCTCTTCAGATGATGAAGGAGGGCCAAGAACACTGGGAGGGGATGGCCACAGAGCGGAGGAGGCTAGCAAAGACAAAGAAG	1	3 Base Changes	VKSDTLSSTEGTASGMQDEVRAVGEEQRSEEPKRRVDTSVSWEALICVGSSKKRARKASSSDDEGGPRTLGGDGHRAEEASKDKE	VKSATLSSTESTASGMQDEVRAVGEEQRSEEPKRRVDTSVSWEALICVGSSKKRARKASSSDDEGGPRTLGGDGHRAEEASKDKE
GTCAAGAGTGACACCTTGTCCTCCACGGAGAGAACGGCGACTGGAATGCAGGATGAGGTCAGAGCGGTTGGCGAGGAGCACAGGTCAGAGGAGCCACAGCGCAGGGTGGATCCTTCAGTGTCGTGGGAGGCGTGGGTTTGTGTCGGAGCGTCGAAGAAGAGATCGAGGACGGCATCCTCTTCAGATGATGTAGGAGGGCCACGGACACTGGGAGGGGATGGCCACCGAGCGGAGGACGCTAGAAAAGACAAAGAAG	GTCAAGAGTGACACCTTGTCCTCCACGGAGAGAACGGCGACTGGAATGCAGGATGAGGTCAGAGCGGTTGGCGAGGAGCACAGGTCAGAGGAGCCACAGCGCAGGGTGGATCCTTCAGTGTCGTGGGAGGCGTGGGTTTGTGTCGGAGCGTCGAAGAAGAGATCGAGGACGGCATCCTCTTCAGATGATGTAGGAGGGCCACGGACACTGGGAGGGGATGGCCACCGAGCGGAGGACGCTAGAAAAGACAAAGAAG	1	19 Base Changes	VKSDTLSSTERTATGMQDEVRAVGEEHRSEEPQRRVDPSVSWEAWVCVGASKKRSRTASSSDDVGGPRTLGGDGHRAEDARKDKE	VKSATLSSTESTASGMQDEVRAVGEEQRSEEPKRRVDTSVSWEALICVGSSKKRARKASSSDDEGGPRTLGGDGHRAEEASKDKE
GTCAAGAGTGACACCTTGTCCTCCACGGAGAGCACGGAGTCTGGAATGCAGGATGAGGTCAGAGCGGTTGGCGAGGAGCAAAGGTCAGAGGAGCCAAAGCGCAGGGTGGATACTTCAGTGTCTTGGGAGGCGTTGATTTGTGTCGGATCGTCCAAGAAGAGAGCGAGGAAGGCATCCTCTTCAGATGATGAAGGAGGGCCAAGAACACTTGGAGGGGATGGCCACAGAGCGGAGGAGGCTAGCAAAGACAAAGAAG	GTCAAGAGTGACACCTTGTCCTCCACGGAGAGCACGGAGTCTGGAATGCAGGATGAGGTCAGAGCGGTTGGCGAGGAGCAAAGGTCAGAGGAGCCAAAGCGCAGGGTGGATACTTCAGTGTCTTGGGAGGCGTTGATTTGTGTCGGATCGTCCAAGAAGAGAGCGAGGAAGGCATCCTCTTCAGATGATGAAGGAGGGCCAAGAACACTTGGAGGGGATGGCCACAGAGCGGAGGAGGCTAGCAAAGACAAAGAAG	1	3 Base Changes	VKSDTLSSTESTESGMQDEVRAVGEEQRSEEPKRRVDTSVSWEALICVGSSKKRARKASSSDDEGGPRTLGGDGHRAEEASKDKE	VKSATLSSTESTASGMQDEVRAVGEEQRSEEPKRRVDTSVSWEALICVGSSKKRARKASSSDDEGGPRTLGGDGHRAEEASKDKE
GTCAAGAGTGACACCTTGTCCTCCACGGAGAGCACGGCGTATGGAATGCAGGATGAGGTCAGAGCGGTTGGCGAGGAGCAAAGGTCAGAGGAGCCAAAGCGCAGGGTGGATACTTCAGTGTCTTGGGAGGCGTTGATTTGTGTCGGATCGTCCAAGAAGAGAGCGAGGAAGGCATCCTCTTCAGATGATGAAGGAGGGCCAAGAACACTGGGAGGGGATGGCCACAGAGCGGAGGAGGCTAGCAAAGACAAAGAAG	GTCAAGAGTGACACCTTGTCCTCCACGGAGAGCACGGCGTATGGAATGCAGGATGAGGTCAGAGCGGTTGGCGAGGAGCAAAGGTCAGAGGAGCCAAAGCGCAGGGTGGATACTTCAGTGTCTTGGGAGGCGTTGATTTGTGTCGGATCGTCCAAGAAGAGAGCGAGGAAGGCATCCTCTTCAGATGATGAAGGAGGGCCAAGAACACTGGGAGGGGATGGCCACAGAGCGGAGGAGGCTAGCAAAGACAAAGAAG	1	2 Base Changes	VKSDTLSSTESTAYGMQDEVRAVGEEQRSEEPKRRVDTSVSWEALICVGSSKKRARKASSSDDEGGPRTLGGDGHRAEEASKDKE	VKSATLSSTESTASGMQDEVRAVGEEQRSEEPKRRVDTSVSWEALICVGSSKKRARKASSSDDEGGPRTLGGDGHRAEEASKDKE
GTCAAGAGTGACACCTTGTCCTCCACGGAGAGCACGGCGTCTGGAATGCAGGATGAGGTCAGAGCGGTTGGAGAGGAGCAAAGGTCAGAGGAGCCCAAGCGCAGGGTGGATACTTCAGTGTCTTGGGAGGCGTTGATTTGTGTCGGATCGTCCAAGAAGAGAGCGAGGAAGGCATCCTCTTCAGATGATGAAGGAGGGCCAAGAACACTGGGAGGGGATGGCCACAGAGCGGAGGCGGCTAGCAAAGGCAAAGAAG	GTCAAGAGTGACACCTTGTCCTCCACGGAGAGCACGGCGTCTGGAATGCAGGATGAGGTCAGAGCGGTTGGAGAGGAGCAAAGGTCAGAGGAGCCCAAGCGCAGGGTGGATACTTCAGTGTCTTGGGAGGCGTTGATTTGTGTCGGATCGTCCAAGAAGAGAGCGAGGAAGGCATCCTCTTCAGATGATGAAGGAGGGCCAAGAACACTGGGAGGGGATGGCCACAGAGCGGAGGCGGCTAGCAAAGGCAAAGAAG	1	5 Base Changes	VKSDTLSSTESTASGMQDEVRAVGEEQRSEEPKRRVDTSVSWEALICVGSSKKRARKASSSDDEGGPRTLGGDGHRAEAASKGKE	VKSATLSSTESTASGMQDEVRAVGEEQRSEEPKRRVDTSVSWEALICVGSSKKRARKASSSDDEGGPRTLGGDGHRAEEASKDKE
GTCAAGAGTGACACCTTGTCCTCCACGGAGAGCACGGCGTCTGGAATGCAGGATGAGGTCAGAGCGGTTGGCAAGGAGCAAAGGTCAGAGGAGCCAAAGCGCAGGGTGGATACTTCAGTGTCTTGGGAGGCGTTGATTTGTGTCGGATCGTCCAAGAAGAGGGCGAGGAAGGCATCCTCTTCAGATGATGAAGGAGGGCCAAGAACACTGGGAGGGGATGGCCACAGAGCGGAGGAGGCTAGCAAAGACAAAGAAG	GTCAAGAGTGACACCTTGTCCTCCACGGAGAGCACGGCGTCTGGAATGCAGGATGAGGTCAGAGCGGTTGGCAAGGAGCAAAGGTCAGAGGAGCCAAAGCGCAGGGTGGATACTTCAGTGTCTTGGGAGGCGTTGATTTGTGTCGGATCGTCCAAGAAGAGGGCGAGGAAGGCATCCTCTTCAGATGATGAAGGAGGGCCAAGAACACTGGGAGGGGATGGCCACAGAGCGGAGGAGGCTAGCAAAGACAAAGAAG	1	3 Base Changes	VKSDTLSSTESTASGMQDEVRAVGKEQRSEEPKRRVDTSVSWEALICVGSSKKRARKASSSDDEGGPRTLGGDGHRAEEASKDKE	VKSATLSSTESTASGMQDEVRAVGEEQRSEEPKRRVDTSVSWEALICVGSSKKRARKASSSDDEGGPRTLGGDGHRAEEASKDKE
GTCAAGAGTGACACCTTGTCCTCCACGGAGAGCACGGCGTCTGGAATGCAGGATGAGGTCAGAGCGGTTGGCGAGGAGCAAAGGTCAGAGGAGCCAAAGCGCAGGGCGGATACTTCAGTGTCTTGGGAGGCGTTGATTTGTGTCGGATCGTCCAAGAAGAGAGCGAGGAAGGCATCCTCTTCAGATGATGAAGGAGGGCCAAGAACACTGGGAGGGGATGGCCACAGAGCGGAGGAGGCTAGCAAAGACAGAGAAG	GTCAAGAGTGACACCTTGTCCTCCACGGAGAGCACGGCGTCTGGAATGCAGGATGAGGTCAGAGCGGTTGGCGAGGAGCAAAGGTCAGAGGAGCCAAAGCGCAGGGCGGATACTTCAGTGTCTTGGGAGGCGTTGATTTGTGTCGGATCGTCCAAGAAGAGAGCGAGGAAGGCATCCTCTTCAGATGATGAAGGAGGGCCAAGAACACTGGGAGGGGATGGCCACAGAGCGGAGGAGGCTAGCAAAGACAGAGAAG	1	3 Base Changes	VKSDTLSSTESTASGMQDEVRAVGEEQRSEEPKRRADTSVSWEALICVGSSKKRARKASSSDDEGGPRTLGGDGHRAEEASKDRE	VKSATLSSTESTASGMQDEVRAVGEEQRSEEPKRRVDTSVSWEALICVGSSKKRARKASSSDDEGGPRTLGGDGHRAEEASKDKE
GTCAAGAGTGACACCTTGTCCTCCACGGAGAGCACGGCGTCTGGAATGCAGGATGAGGTCAGAGCGGTTGGCGAGGAGCAAAGGTCAGAGGAGCCAAAGCGCAGGGTGGATACTTCAGTGTCTTGGGAGGCGTTGATTTGTGTCGGATCGTCCAAGAAGAGAGCGAGGAAGGCATCCTCTTAAGATGATGAAGGAGGGCCAAGAACACTGGGAGGGGATGGCCACAGAGCGGAGGAGGATAGCAAAGACAAAGAAG	GTCAAGAGTGACACCTTGTCCTCCACGGAGAGCACGGCGTCTGGAATGCAGGATGAGGTCAGAGCGGTTGGCGAGGAGCAAAGGTCAGAGGAGCCAAAGCGCAGGGTGGATACTTCAGTGTCTTGGGAGGCGTTGATTTGTGTCGGATCGTCCAAGAAGAGAGCGAGGAAGGCATCCTCTTAAGATGATGAAGGAGGGCCAAGAACACTGGGAGGGGATGGCCACAGAGCGGAGGAGGATAGCAAAGACAAAGAAG	1	3 Base Changes	VKSDTLSSTESTASGMQDEVRAVGEEQRSEEPKRRVDTSVSWEALICVGSSKKRARKASS*	VKSATLSSTESTASGMQDEVRAVGEEQRSEEPKRRVDTSVSWEALICVGSSKKRARKASSSDDEGGPRTLGGDGHRAEEASKDKE
GTCAAGAGTGACACCTTGTCCTCCACGGAGAGCACGGCGTCTGGAATGCAGGATGAGGTCAGAGCGGTTGGCGAGGAGCAAAGGTCAGAGGAGCCAAAGCGCAGGGTGGATACTTCAGTGTCTTGGGAGGCGTTGATTTGTGTCGGATCGTCCAAGAAGAGAGCGAGGAAGGCATCCTCTTCAGATGATGAAGGAGGGCCAAGAACACTGGGAGGGGATGGCCACAGAGAGGAGGAGGCTAGCAAAGACAAAGAAG	GTCAAGAGTGACACCTTGTCCTCCACGGAGAGCACGGCGTCTGGAATGCAGGATGAGGTCAGAGCGGTTGGCGAGGAGCAAAGGTCAGAGGAGCCAAAGCGCAGGGTGGATACTTCAGTGTCTTGGGAGGCGTTGATTTGTGTCGGATCGTCCAAGAAGAGAGCGAGGAAGGCATCCTCTTCAGATGATGAAGGAGGGCCAAGAACACTGGGAGGGGATGGCCACAGAGAGGAGGAGGCTAGCAAAGACAAAGAAG	1	2 Base Changes	VKSDTLSSTESTASGMQDEVRAVGEEQRSEEPKRRVDTSVSWEALICVGSSKKRARKASSSDDEGGPRTLGGDGHREEEASKDKE	VKSATLSSTESTASGMQDEVRAVGEEQRSEEPKRRVDTSVSWEALICVGSSKKRARKASSSDDEGGPRTLGGDGHRAEEASKDKE
GTCAAGAGTGACACCTTGTCCTCCACGGAGAGCACGGCGTCTGGAATGCAGGATGAGGTCAGAGCGGTTGGCGAGGAGCAAAGGTCAGAGGAGCCAAAGCGCAGGGTGGATACTTCAGTGTCTTGGGAGGCGTTGATTTGTGTCGGATCGTCCAAGAAGAGAGCGAGGAAGGCATCCTCTTCAGATGATGAAGGAGGGCCAAGAACACTGGGAGGGGATGGCCACAGAGCGGAGGAGGCTAGCAAAGACATAGAAG	GTCAAGAGTGACACCTTGTCCTCCACGGAGAGCACGGCGTCTGGAATGCAGGATGAGGTCAGAGCGGTTGGCGAGGAGCAAAGGTCAGAGGAGCCAAAGCGCAGGGTGGATACTTCAGTGTCTTGGGAGGCGTTGATTTGTGTCGGATCGTCCAAGAAGAGAGCGAGGAAGGCATCCTCTTCAGATGATGAAGGAGGGCCAAGAACACTGGGAGGGGATGGCCACAGAGCGGAGGAGGCTAGCAAAGACATAGAAG	1	2 Base Changes	VKSDTLSSTESTASGMQDEVRAVGEEQRSEEPKRRVDTSVSWEALICVGSSKKRARKASSSDDEGGPRTLGGDGHRAEEASKDIE	VKSATLSSTESTASGMQDEVRAVGEEQRSEEPKRRVDTSVSWEALICVGSSKKRARKASSSDDEGGPRTLGGDGHRAEEASKDKE
GTCAAGAGTGACACCTTGTCCTCCACGGAGAGCACGGCGTCTGGAATGCAGGATGAGGTCAGAGCGGTTGGCGAGGAGCAAAGGTCAGAGGAGCCAAAGCGCAGGGTGGATACTTCAGTGTCTTGGGAGGCGTTGATTTGTGTCGGATCGTCCAAGAAGAGAGCGAGGAAGGCATCCTCTTCAGATGATGAAGGAGGGCCAAGAACACTGGGAGGGGATGGCCACAGAGCGGAGGAGGCTAGCAAATACAAAGAAG	GTCAAGAGTGACACCTTGTCCTCCACGGAGAGCACGGCGTCTGGAATGCAGGATGAGGTCAGAGCGGTTGGCGAGGAGCAAAGGTCAGAGGAGCCAAAGCGCAGGGTGGATACTTCAGTGTCTTGGGAGGCGTTGATTTGTGTCGGATCGTCCAAGAAGAGAGCGAGGAAGGCATCCTCTTCAGATGATGAAGGAGGGCCAAGAACACTGGGAGGGGATGGCCACAGAGCGGAGGAGGCTAGCAAATACAAAGAAG	1	2 Base Changes	VKSDTLSSTESTASGMQDEVRAVGEEQRSEEPKRRVDTSVSWEALICVGSSKKRARKASSSDDEGGPRTLGGDGHRAEEASKYKE	VKSATLSSTESTASGMQDEVRAVGEEQRSEEPKRRVDTSVSWEALICVGSSKKRARKASSSDDEGGPRTLGGDGHRAEEASKDKE
GTCAAGAGTGACACCTTGTCCTCCACGGAGAGCACGGCGTCTGGAATGCAGGATGAGGTCAGAGCGGTTGGCGAGGAGCAAAGGTCAGAGGAGCCAAAGCGCAGGGTGGATACTTCAGTGTCTTGGGAGGCGTTGATTTGTGTCGGATCGTCCAAGAAGAGAGCGAGGAAGGCATCCTCTTCAGATGATGAAGGAGGGCCAAGAACACTGGGAGGGGATGGCCACAGAGCGTAGGAGGCTAGCAAAGACAAAGAAG	GTCAAGAGTGACACCTTGTCCTCCACGGAGAGCACGGCGTCTGGAATGCAGGATGAGGTCAGAGCGGTTGGCGAGGAGCAAAGGTCAGAGGAGCCAAAGCGCAGGGTGGATACTTCAGTGTCTTGGGAGGCGTTGATTTGTGTCGGATCGTCCAAGAAGAGAGCGAGGAAGGCATCCTCTTCAGATGATGAAGGAGGGCCAAGAACACTGGGAGGGGATGGCCACAGAGCGTAGGAGGCTAGCAAAGACAAAGAAG	1	2 Base Changes	VKSDTLSSTESTASGMQDEVRAVGEEQRSEEPKRRVDTSVSWEALICVGSSKKRARKASSSDDEGGPRTLGGDGHRA*	VKSATLSSTESTASGMQDEVRAVGEEQRSEEPKRRVDTSVSWEALICVGSSKKRARKASSSDDEGGPRTLGGDGHRAEEASKDKE
GTCAAGAGTGACACCTTGTCCTCCACGGAGAGCACGGCGTCTGGAATGCAGGATGAGGTCAGAGCGGTTGGCGAGGAGCAAAGGTCAGAGGAGCCAAAGCGCAGGGTGGATACTTCAGTGTCTTGGGAGGCGTTGATTTGTGTCGGATCGTCCAAGAAGAGAGCGAGGAAGGCATCCTCTTCAGATGATGAAGGAGGGCCAAGAACACTGGGAGGGGATGGCCACAGTGCGGAGGAGGCTAGCAAAGACAAAGAAG	GTCAAGAGTGACACCTTGTCCTCCACGGAGAGCACGGCGTCTGGAATGCAGGATGAGGTCAGAGCGGTTGGCGAGGAGCAAAGGTCAGAGGAGCCAAAGCGCAGGGTGGATACTTCAGTGTCTTGGGAGGCGTTGATTTGTGTCGGATCGTCCAAGAAGAGAGCGAGGAAGGCATCCTCTTCAGATGATGAAGGAGGGCCAAGAACACTGGGAGGGGATGGCCACAGTGCGGAGGAGGCTAGCAAAGACAAAGAAG	1	2 Base Changes	VKSDTLSSTESTASGMQDEVRAVGEEQRSEEPKRRVDTSVSWEALICVGSSKKRARKASSSDDEGGPRTLGGDGHSAEEASKDKE	VKSATLSSTESTASGMQDEVRAVGEEQRSEEPKRRVDTSVSWEALICVGSSKKRARKASSSDDEGGPRTLGGDGHRAEEASKDKE
GTCAAGAGTGACACCTTGTCCTCCACGGAGAGCACGGCGTCTGGAATGCAGGATGAGGTCAGAGCGGTTGGCGAGGAGCAAAGGTCAGAGGAGCCAAAGCGCAGGGTGGATACTTCAGTGTCTTGGGAGGCGTTGATTTGTGTCGGATCGTCCAAGAAGAGAGCGAGGAAGGCATCCTCTTCAGATGATGAAGGAGGGCCAATAACACTGGGAGGGGATGGCCACAGAGCGGAGGAGGCTAGCAAAGACAAAGAAG	GTCAAGAGTGACACCTTGTCCTCCACGGAGAGCACGGCGTCTGGAATGCAGGATGAGGTCAGAGCGGTTGGCGAGGAGCAAAGGTCAGAGGAGCCAAAGCGCAGGGTGGATACTTCAGTGTCTTGGGAGGCGTTGATTTGTGTCGGATCGTCCAAGAAGAGAGCGAGGAAGGCATCCTCTTCAGATGATGAAGGAGGGCCAATAACACTGGGAGGGGATGGCCACAGAGCGGAGGAGGCTAGCAAAGACAAAGAAG	1	2 Base Changes	VKSDTLSSTESTASGMQDEVRAVGEEQRSEEPKRRVDTSVSWEALICVGSSKKRARKASSSDDEGGPITLGGDGHRAEEASKDKE	VKSATLSSTESTASGMQDEVRAVGEEQRSEEPKRRVDTSVSWEALICVGSSKKRARKASSSDDEGGPRTLGGDGHRAEEASKDKE
GTCAAGAGTGACACCTTGTCCTCCACGGAGAGCACGGCGTCTGGAATGCAGGATGAGGTCAGAGCGGTTGGCGAGGAGCAAAGGTCAGAGGAGCCAAAGCGCAGGGTGGATACTTCAGTGTCTTGGGAGGCGTTGATTTGTGTCGGATCGTCCAAGAAGAGAGCGAGGAAGGCATCCTCTTCAGATGATGAAGGAGGGCCACGAACACTGGGAGGGGATGGCCACAGAGGGGAGGAGGCTAGCAAAGACAAAGAAG	GTCAAGAGTGACACCTTGTCCTCCACGGAGAGCACGGCGTCTGGAATGCAGGATGAGGTCAGAGCGGTTGGCGAGGAGCAAAGGTCAGAGGAGCCAAAGCGCAGGGTGGATACTTCAGTGTCTTGGGAGGCGTTGATTTGTGTCGGATCGTCCAAGAAGAGAGCGAGGAAGGCATCCTCTTCAGATGATGAAGGAGGGCCACGAACACTGGGAGGGGATGGCCACAGAGGGGAGGAGGCTAGCAAAGACAAAGAAG	1	3 Base Changes	VKSDTLSSTESTASGMQDEVRAVGEEQRSEEPKRRVDTSVSWEALICVGSSKKRARKASSSDDEGGPRTLGGDGHRGEEASKDKE	VKSATLSSTESTASGMQDEVRAVGEEQRSEEPKRRVDTSVSWEALICVGSSKKRARKASSSDDEGGPRTLGGDGHRAEEASKDKE
GTCAAGAGTGACACCTTGTCCTCCACGGAGAGCACGGCGTCTGGAATGCAGGATGAGGTCAGAGCGGTTGGCGAGGAGCAAAGGTCAGAGGAGCCAAAGCGCAGGGTGGATACTTCAGTGTCTTGGGAGGCGTTGATTTGTGTCTGATCGTCCAAGAAGAGAGCGAGGAAGGCATCCTCTTCAGATGATGAAGGAGGGCCAAGAACACTGGGAGGGGATGGCCACAGAGCGGAGGAGGCTAGCAAAGACAAAGAAG	GTCAAGAGTGACACCTTGTCCTCCACGGAGAGCACGGCGTCTGGAATGCAGGATGAGGTCAGAGCGGTTGGCGAGGAGCAAAGGTCAGAGGAGCCAAAGCGCAGGGTGGATACTTCAGTGTCTTGGGAGGCGTTGATTTGTGTCTGATCGTCCAAGAAGAGAGCGAGGAAGGCATCCTCTTCAGATGATGAAGGAGGGCCAAGAACACTGGGAGGGGATGGCCACAGAGCGGAGGAGGCTAGCAAAGACAAAGAAG	1	2 Base Changes	VKSDTLSSTESTASGMQDEVRAVGEEQRSEEPKRRVDTSVSWEALICV*	VKSATLSSTESTASGMQDEVRAVGEEQRSEEPKRRVDTSVSWEALICVGSSKKRARKASSSDDEGGPRTLGGDGHRAEEASKDKE
GTCAAGAGTGACACCTTGTCCTCCACGGAGAGCACGGCGTCTGGAATGCAGGATGAGGTCAGAGCGGTTGGCGAGGAGCAAAGGTCAGAGGAGCCAAAGCGCAGGGTTGATACTTCAGTGTCTTGGGAGGCGTTGATTTGTGTCGGATCGTCCAAGAAGAGAGCGAGGAAGGCATCCTCTTCAGATGATGAAGGAGGGCCAAGAACACTGGGAGGGGATGGCCACAGAGCGGAGGAGGCTAGCAAAGACAAAGAAG	GTCAAGAGTGACACCTTGTCCTCCACGGAGAGCACGGCGTCTGGAATGCAGGATGAGGTCAGAGCGGTTGGCGAGGAGCAAAGGTCAGAGGAGCCAAAGCGCAGGGTTGATACTTCAGTGTCTTGGGAGGCGTTGATTTGTGTCGGATCGTCCAAGAAGAGAGCGAGGAAGGCATCCTCTTCAGATGATGAAGGAGGGCCAAGAACACTGGGAGGGGATGGCCACAGAGCGGAGGAGGCTAGCAAAGACAAAGAAG	1	2 Base Changes	VKSDTLSSTESTASGMQDEVRAVGEEQRSEEPKRRVDTSVSWEALICVGSSKKRARKASSSDDEGGPRTLGGDGHRAEEASKDKE	VKSATLSSTESTASGMQDEVRAVGEEQRSEEPKRRVDTSVSWEALICVGSSKKRARKASSSDDEGGPRTLGGDGHRAEEASKDKE
GTCAAGAGTGACACCTTGTCCTCCACGGAGAGCACGGCGTCTGGAATGCAGTATGAGGTCAGAGCGGTTGGCGAGGAGCAAAGGTCAGAGGAGCCAAAGCGCAGGGTGGATACTTCAGTGTCTTGGGAGGCGTTGATTTGTGTCGGATCGTCCAAGAAGAGAGCGAGGAAGGCATCCTCTTCAGATGAGGAAGGAGGGCCAAGAACACTGGGAGGGGATGGCCACAGAGCGGAGGAGGCTAGCAAAGACAAAGAAG	GTCAAGAGTGACACCTTGTCCTCCACGGAGAGCACGGCGTCTGGAATGCAGTATGAGGTCAGAGCGGTTGGCGAGGAGCAAAGGTCAGAGGAGCCAAAGCGCAGGGTGGATACTTCAGTGTCTTGGGAGGCGTTGATTTGTGTCGGATCGTCCAAGAAGAGAGCGAGGAAGGCATCCTCTTCAGATGAGGAAGGAGGGCCAAGAACACTGGGAGGGGATGGCCACAGAGCGGAGGAGGCTAGCAAAGACAAAGAAG	1	3 Base Changes	VKSDTLSSTESTASGMQYEVRAVGEEQRSEEPKRRVDTSVSWEALICVGSSKKRARKASSSDEEGGPRTLGGDGHRAEEASKDKE	VKSATLSSTESTASGMQDEVRAVGEEQRSEEPKRRVDTSVSWEALICVGSSKKRARKASSSDDEGGPRTLGGDGHRAEEASKDKE
GTCAAGAGTGACACCTTGTCCTCCACGGAGAGCACGGCGTCTGGAATGCGGGATGAGGTCAGAGCGGTTGGCGAGGAGCAAAGGTCAGAGGAGCCAAAGCGCAGGGTGGATACTTCAGTGTCTTGGGAGGCGTTGATTTGTGTCGGATCGTCCAAGAAGAGAGCGAGGAAGGCATCCTCTTCAGATGATGAAGGAGGGCCAAGAACACTGGGAGTGGATGGCCACAGAGCGGAGGAGTCTTGCAAAGACAAAGAAG	GTCAAGAGTGACACCTTGTCCTCCACGGAGAGCACGGCGTCTGGAATGCGGGATGAGGTCAGAGCGGTTGGCGAGGAGCAAAGGTCAGAGGAGCCAAAGCGCAGGGTGGATACTTCAGTGTCTTGGGAGGCGTTGATTTGTGTCGGATCGTCCAAGAAGAGAGCGAGGAAGGCATCCTCTTCAGATGATGAAGGAGGGCCAAGAACACTGGGAGTGGATGGCCACAGAGCGGAGGAGTCTTGCAAAGACAAAGAAG	1	5 Base Changes	VKSDTLSSTESTASGMRDEVRAVGEEQRSEEPKRRVDTSVSWEALICVGSSKKRARKASSSDDEGGPRTLGVDGHRAEESCKDKE	VKSATLSSTESTASGMQDEVRAVGEEQRSEEPKRRVDTSVSWEALICVGSSKKRARKASSSDDEGGPRTLGGDGHRAEEASKDKE
GTCAAGAGTGACACCTTGTCCTCCACGGAGAGCACGGCGTCTGGAATTCAGGATGAGGTCAGAGCGGTTGGCGAGGAGCAAAGGTCAGAGGAGCCAAAGCGCAGGGTGGATACTTCAGTGTCTTGGGAGGCGTTGATTTGTGTCGGATCGTCCAAGAAGAGAGCGAGGAAGGCATCCTCTTCAGATGATGAAGGAGGGCCAAGAACACTGGGAGGGGATGGCCACAGAGCGGAGGAGGCTAGCAAAGACAAAGAAG	GTCAAGAGTGACACCTTGTCCTCCACGGAGAGCACGGCGTCTGGAATTCAGGATGAGGTCAGAGCGGTTGGCGAGGAGCAAAGGTCAGAGGAGCCAAAGCGCAGGGTGGATACTTCAGTGTCTTGGGAGGCGTTGATTTGTGTCGGATCGTCCAAGAAGAGAGCGAGGAAGGCATCCTCTTCAGATGATGAAGGAGGGCCAAGAACACTGGGAGGGGATGGCCACAGAGCGGAGGAGGCTAGCAAAGACAAAGAAG	1	2 Base Changes	VKSDTLSSTESTASGIQDEVRAVGEEQRSEEPKRRVDTSVSWEALICVGSSKKRARKASSSDDEGGPRTLGGDGHRAEEASKDKE	VKSATLSSTESTASGMQDEVRAVGEEQRSEEPKRRVDTSVSWEALICVGSSKKRARKASSSDDEGGPRTLGGDGHRAEEASKDKE
GTCAAGAGTGACACCTTGTCCTCCACGGAGAGCACGGCGTCTTGAATGCAGGATGAGGTCAGAGCGGTTGGCGAGGAGCAAAGGTCAGAGGAGCCAAAGCGCAGGGTGGATACTTCAGTGTCTTGGGAGGCGTTGATTTGTGTCGGATCGTCCAAGAAGAGAGCGAGGAAGGCATCCTCTTCAGATGATGAAGGAGGGCCAAGAACACTGGGAGGGGATGGCCACAGAGCGGAGGAGGCTAGCAAAGACAAAGAAG	GTCAAGAGTGACACCTTGTCCTCCACGGAGAGCACGGCGTCTTGAATGCAGGATGAGGTCAGAGCGGTTGGCGAGGAGCAAAGGTCAGAGGAGCCAAAGCGCAGGGTGGATACTTCAGTGTCTTGGGAGGCGTTGATTTGTGTCGGATCGTCCAAGAAGAGAGCGAGGAAGGCATCCTCTTCAGATGATGAAGGAGGGCCAAGAACACTGGGAGGGGATGGCCACAGAGCGGAGGAGGCTAGCAAAGACAAAGAAG	1	2 Base Changes	VKSDTLSSTESTAS*	VKSATLSSTESTASGMQDEVRAVGEEQRSEEPKRRVDTSVSWEALICVGSSKKRARKASSSDDEGGPRTLGGDGHRAEEASKDKE
GTCAAGAGTGACACCTTGTCCTCCACGGAGAGCACTGCGTCTGGAATGCAGGATGAGGTCAGAGCGGTTGGCGAGGAGCAAAGGTCAGAGGAGCCAAAGCGCAGGGTGGATACTTCAGTGTCTTGGGAGGCGTTGATGTGTGTCGGATCGTCCAAGAAGAGAGCGAGGAAGGCATCCTCTTCAGATGATGAAGGAGGGCCAAGAACACTGGGAGGGGATGGCCACAGAGCGGAGGAGGCTAGCAAAGACAAAGAAG	GTCAAGAGTGACACCTTGTCCTCCACGGAGAGCACTGCGTCTGGAATGCAGGATGAGGTCAGAGCGGTTGGCGAGGAGCAAAGGTCAGAGGAGCCAAAGCGCAGGGTGGATACTTCAGTGTCTTGGGAGGCGTTGATGTGTGTCGGATCGTCCAAGAAGAGAGCGAGGAAGGCATCCTCTTCAGATGATGAAGGAGGGCCAAGAACACTGGGAGGGGATGGCCACAGAGCGGAGGAGGCTAGCAAAGACAAAGAAG	1	3 Base Changes	VKSDTLSSTESTASGMQDEVRAVGEEQRSEEPKRRVDTSVSWEALMCVGSSKKRARKASSSDDEGGPRTLGGDGHRAEEASKDKE	VKSATLSSTESTASGMQDEVRAVGEEQRSEEPKRRVDTSVSWEALICVGSSKKRARKASSSDDEGGPRTLGGDGHRAEEASKDKE
GTCAAGAGTGACACCTTGTCCTCCACGGAGAGCGCGGCGTCTGGAATGCAGGATGAGGTCAGAGCGGTTGGCGAGGAGCAAAGGTCAGAGGAGCCAAAGCGCAGGGTGGATACTTCAGTGTCTTGGGAGGCGTTGATTTGTGTCGGATCGTCCAAGAAGAGAGCGAGGAAGGCATCCTCTTCAGATGATGAAGGAGGGCCAAGAACACTGGGAGGGGATGGCCACAGAGCGGAGGAGGCTAGCAAAGACAAAGAAG	GTCAAGAGTGACACCTTGTCCTCCACGGAGAGCGCGGCGTCTGGAATGCAGGATGAGGTCAGAGCGGTTGGCGAGGAGCAAAGGTCAGAGGAGCCAAAGCGCAGGGTGGATACTTCAGTGTCTTGGGAGGCGTTGATTTGTGTCGGATCGTCCAAGAAGAGAGCGAGGAAGGCATCCTCTTCAGATGATGAAGGAGGGCCAAGAACACTGGGAGGGGATGGCCACAGAGCGGAGGAGGCTAGCAAAGACAAAGAAG	1	2 Base Changes	VKSDTLSSTESAASGMQDEVRAVGEEQRSEEPKRRVDTSVSWEALICVGSSKKRARKASSSDDEGGPRTLGGDGHRAEEASKDKE	VKSATLSSTESTASGMQDEVRAVGEEQRSEEPKRRVDTSVSWEALICVGSSKKRARKASSSDDEGGPRTLGGDGHRAEEASKDKE
GTCAAGAGTGACACCTTGTCCTCCACGGATAGCACGGAGTATGGAATGCAGGATGAGGTGAGAGCGGTTGGCGAGGAGCAAAGGTCAGAGGAGCCAAAGCGCAGGGTGGATACTTCAGTGTCTTGGGAGGCGTTGATTTGTGTCGGATCGTCCAAGAAGAGAGCGAGGAAGGCATCCTCTTCAGATGATGAAGGAGGGCCAAGAACACTGCGAGGGGATGGCCACAGAGCGGAGGAGGCTAGCAAAGACAAAGAAG	GTCAAGAGTGACACCTTGTCCTCCACGGATAGCACGGAGTATGGAATGCAGGATGAGGTGAGAGCGGTTGGCGAGGAGCAAAGGTCAGAGGAGCCAAAGCGCAGGGTGGATACTTCAGTGTCTTGGGAGGCGTTGATTTGTGTCGGATCGTCCAAGAAGAGAGCGAGGAAGGCATCCTCTTCAGATGATGAAGGAGGGCCAAGAACACTGCGAGGGGATGGCCACAGAGCGGAGGAGGCTAGCAAAGACAAAGAAG	1	6 Base Changes	VKSDTLSSTDSTEYGMQDEVRAVGEEQRSEEPKRRVDTSVSWEALICVGSSKKRARKASSSDDEGGPRTLRGDGHRAEEASKDKE	VKSATLSSTESTASGMQDEVRAVGEEQRSEEPKRRVDTSVSWEALICVGSSKKRARKASSSDDEGGPRTLGGDGHRAEEASKDKE
GTCAAGAGTGACACCTTGTCCTCCACGGATAGCACGGCGTCTGGAATGCAGTCTGAGGTCAGTGCGGTTGTCGAGGAGCAAAGGTCAGATGAGCCAAAGCGCAGGGTGTATACTTCAGTGTCTTGGGAGGCGTTGATTTGTGTCGGATAGTCCAAGAAGAGAGCGAGGAAGGCATACTCTTCAGATGATGAAGGAGGGCCAAGAACACTGGGAGGGGATGGCCACAGAGCGGATGAGGCTAGCAAAGACAAAGAAG	GTCAAGAGTGACACCTTGTCCTCCACGGATAGCACGGCGTCTGGAATGCAGTCTGAGGTCAGTGCGGTTGTCGAGGAGCAAAGGTCAGATGAGCCAAAGCGCAGGGTGTATACTTCAGTGTCTTGGGAGGCGTTGATTTGTGTCGGATAGTCCAAGAAGAGAGCGAGGAAGGCATACTCTTCAGATGATGAAGGAGGGCCAAGAACACTGGGAGGGGATGGCCACAGAGCGGATGAGGCTAGCAAAGACAAAGAAG	1	11 Base Changes	VKSDTLSSTDSTASGMQSEVSAVVEEQRSDEPKRRVYTSVSWEALICVG*	VKSATLSSTESTASGMQDEVRAVGEEQRSEEPKRRVDTSVSWEALICVGSSKKRARKASSSDDEGGPRTLGGDGHRAEEASKDKE
GTCAAGAGTGACACCTTTTCCTCCACGGAGAGCACGGCGTCTGGAATGCAGGATGAGGTCAGAGCGGTTGGCGAGGAGCAAAGGTCAGAGGAGCCAAAGCGCAGGGTGGATACTTCAGTGTCCTGGGAGGCGTTGATTTGTGTCGGATCGTCCAAGAAGAGAGAGAGGAAGGCATCCTCTTCAGATGATGAAGGAGGGCCAAGAACACTGGGAGGGGATGGCCACAGAGCGGAGGAGGCTAGCAAAGACAAAGAAG	GTCAAGAGTGACACCTTTTCCTCCACGGAGAGCACGGCGTCTGGAATGCAGGATGAGGTCAGAGCGGTTGGCGAGGAGCAAAGGTCAGAGGAGCCAAAGCGCAGGGTGGATACTTCAGTGTCCTGGGAGGCGTTGATTTGTGTCGGATCGTCCAAGAAGAGAGAGAGGAAGGCATCCTCTTCAGATGATGAAGGAGGGCCAAGAACACTGGGAGGGGATGGCCACAGAGCGGAGGAGGCTAGCAAAGACAAAGAAG	1	4 Base Changes	VKSDTFSSTESTASGMQDEVRAVGEEQRSEEPKRRVDTSVSWEALICVGSSKKRERKASSSDDEGGPRTLGGDGHRAEEASKDKE	VKSATLSSTESTASGMQDEVRAVGEEQRSEEPKRRVDTSVSWEALICVGSSKKRARKASSSDDEGGPRTLGGDGHRAEEASKDKE
GTCAAGAGTGACACCTTTTCCTCCACGGAGAGCACGGCGTCTGGAATGCAGGATGAGGTCAGAGCGGTTGGCGAGGAGCAAAGGTCAGAGGAGCCAAAGCGCAGGGTGGATACTTCAGTGTCTTGGGAGGCGTTGATTTGTGTCGGATCGTCCAAGAAGAGAGCGAGGAAGGCATCCTCTTCAGATGATGAAGGAGGGCCAAGAACAATGGGAGGGGATGGCCACAGAGCGGAGGAGGCTAGCAAAGACAAAGAAG	GTCAAGAGTGACACCTTTTCCTCCACGGAGAGCACGGCGTCTGGAATGCAGGATGAGGTCAGAGCGGTTGGCGAGGAGCAAAGGTCAGAGGAGCCAAAGCGCAGGGTGGATACTTCAGTGTCTTGGGAGGCGTTGATTTGTGTCGGATCGTCCAAGAAGAGAGCGAGGAAGGCATCCTCTTCAGATGATGAAGGAGGGCCAAGAACAATGGGAGGGGATGGCCACAGAGCGGAGGAGGCTAGCAAAGACAAAGAAG	1	3 Base Changes	VKSDTFSSTESTASGMQDEVRAVGEEQRSEEPKRRVDTSVSWEALICVGSSKKRARKASSSDDEGGPRTMGGDGHRAEEASKDKE	VKSATLSSTESTASGMQDEVRAVGEEQRSEEPKRRVDTSVSWEALICVGSSKKRARKASSSDDEGGPRTLGGDGHRAEEASKDKE
GTCAAGAGTGACACCTTTTCCTCCACGGAGAGCACGGCGTCTGGAATGCAGGATGAGGTCAGAGCGGTTGGCGAGGAGCAAAGGTCAGAGGAGCCAAAGCGCAGGGTGGATACTTCAGTGTCTTGGGAGGCGTTGATTTGTGTCGGATCGTCCAAGAAGAGAGCGAGGAAGGCATCCTCTTCAGATGATGAAGGAGGGCCAAGAACACTGGGAGGGGATGGCCACAGAGCGGAGGAGGCTAGCAAAGACAAAGAAG	GTCAAGAGTGACACCTTTTCCTCCACGGAGAGCACGGCGTCTGGAATGCAGGATGAGGTCAGAGCGGTTGGCGAGGAGCAAAGGTCAGAGGAGCCAAAGCGCAGGGTGGATACTTCAGTGTCTTGGGAGGCGTTGATTTGTGTCGGATCGTCCAAGAAGAGAGCGAGGAAGGCATCCTCTTCAGATGATGAAGGAGGGCCAAGAACACTGGGAGGGGATGGCCACAGAGCGGAGGAGGCTAGCAAAGACAAAGAAG	1	2 Base Changes	VKSDTFSSTESTASGMQDEVRAVGEEQRSEEPKRRVDTSVSWEALICVGSSKKRARKASSSDDEGGPRTLGGDGHRAEEASKDKE	VKSATLSSTESTASGMQDEVRAVGEEQRSEEPKRRVDTSVSWEALICVGSSKKRARKASSSDDEGGPRTLGGDGHRAEEASKDKE
GTCAAGAGTGCAAACTTGTCCTCAACGGAGAGCACGGCGTCTGGAATGCAGGATGAGGTCAGAGCGGTTGGCGAGGAGCAAAGGTCAGAGGAGCCAAAGCGCAGGGTGGATACTTCAGTGTCTTGGGAGGCGTTGATTTGTGTCGGATCGTCCAAGAAGAGAGCGAGGAAGGCATCCTCTTCAGATGATGAAGGAGGGCCAAGAACACTGGGAGGGGATGGCCACAGAGCGGAGGAGGCTAGCAAAGACAAAGAAG	GTCAAGAGTGCAAACTTGTCCTCAACGGAGAGCACGGCGTCTGGAATGCAGGATGAGGTCAGAGCGGTTGGCGAGGAGCAAAGGTCAGAGGAGCCAAAGCGCAGGGTGGATACTTCAGTGTCTTGGGAGGCGTTGATTTGTGTCGGATCGTCCAAGAAGAGAGCGAGGAAGGCATCCTCTTCAGATGATGAAGGAGGGCCAAGAACACTGGGAGGGGATGGCCACAGAGCGGAGGAGGCTAGCAAAGACAAAGAAG	1	3 Base Changes	VKSANLSSTESTASGMQDEVRAVGEEQRSEEPKRRVDTSVSWEALICVGSSKKRARKASSSDDEGGPRTLGGDGHRAEEASKDKE	VKSATLSSTESTASGMQDEVRAVGEEQRSEEPKRRVDTSVSWEALICVGSSKKRARKASSSDDEGGPRTLGGDGHRAEEASKDKE
GTCAAGAGTGCAAACTTGTCCTCCACGGAGAGCACGGCGTCTGGAATGCAGGATGAGGTCAGAGCGGTTGGCGAGGAGCAAAGGTCAGAGGAGCCAAAGCGCAGGGTGGATACTTCAGTGTCTTGGGAGGCGTTGATTTGTGTCGGATCGTCCAAGAAGAGAGCGAGGAAGGCATCCTCTTCAGATGATGAAGGAGGGCCAAGAACACTGGGAGGGGATGGCCACAGAGCGGAGGAGGCTAGCAAAGACAAAGAAG	GTCAAGAGTGCAAACTTGTCCTCCACGGAGAGCACGGCGTCTGGAATGCAGGATGAGGTCAGAGCGGTTGGCGAGGAGCAAAGGTCAGAGGAGCCAAAGCGCAGGGTGGATACTTCAGTGTCTTGGGAGGCGTTGATTTGTGTCGGATCGTCCAAGAAGAGAGCGAGGAAGGCATCCTCTTCAGATGATGAAGGAGGGCCAAGAACACTGGGAGGGGATGGCCACAGAGCGGAGGAGGCTAGCAAAGACAAAGAAG	1	2 Base Changes	VKSANLSSTESTASGMQDEVRAVGEEQRSEEPKRRVDTSVSWEALICVGSSKKRARKASSSDDEGGPRTLGGDGHRAEEASKDKE	VKSATLSSTESTASGMQDEVRAVGEEQRSEEPKRRVDTSVSWEALICVGSSKKRARKASSSDDEGGPRTLGGDGHRAEEASKDKE
GTCAAGAGTGCAACATTGTCCTCCACGGAGAGCACGGCGTCTGGAATGCAGGATGAGGTCAGAGCGGTTGGCGAGGAGCAAAGGTCAGAGGAGCCAAAGCGCAGGGTGGATACTTCAGTGTCTTGGGAGGCGTTGATTTGTGTCGGATCGTCCAAGAAGAGAGCGAGGAAGGCATCCTCTTCAGATGATGAAGGAGGGCCAAGAACACTGGGAGGGGATGGCCACAGAGCGGAGGAGGCTAGCAAAGACAAAGAAG	GTCAAGAGTGCAACATTGTCCTCCACGGAGAGCACGGCGTCTGGAATGCAGGATGAGGTCAGAGCGGTTGGCGAGGAGCAAAGGTCAGAGGAGCCAAAGCGCAGGGTGGATACTTCAGTGTCTTGGGAGGCGTTGATTTGTGTCGGATCGTCCAAGAAGAGAGCGAGGAAGGCATCCTCTTCAGATGATGAAGGAGGGCCAAGAACACTGGGAGGGGATGGCCACAGAGCGGAGGAGGCTAGCAAAGACAAAGAAG	1	2 Base Changes	VKSATLSSTESTASGMQDEVRAVGEEQRSEEPKRRVDTSVSWEALICVGSSKKRARKASSSDDEGGPRTLGGDGHRAEEASKDKE	VKSATLSSTESTASGMQDEVRAVGEEQRSEEPKRRVDTSVSWEALICVGSSKKRARKASSSDDEGGPRTLGGDGHRAEEASKDKE
GTCAAGAGTGCAACATTTTCCTCCACGGAGAGCACGGCGTCTGGAATGCAGGATGAGGTCAGAGCGGTTGGCGAGGAGCAAAGGTCAGAGGAGCCAAAGCGCAGGGTGGATACTTCAGTGTCTTGGGAGGCGTTGATTTGTGTCGGATCGTCCAAGAAGAGAGCGAGGAAGGAATCCTCTTCAGATGATGAAGGAGGGCCAAGAACACTGGGAGGGGATGGCAACAGAGCGGAGGAGGCTAGCAAAGACAAAGAAG	GTCAAGAGTGCAACATTTTCCTCCACGGAGAGCACGGCGTCTGGAATGCAGGATGAGGTCAGAGCGGTTGGCGAGGAGCAAAGGTCAGAGGAGCCAAAGCGCAGGGTGGATACTTCAGTGTCTTGGGAGGCGTTGATTTGTGTCGGATCGTCCAAGAAGAGAGCGAGGAAGGAATCCTCTTCAGATGATGAAGGAGGGCCAAGAACACTGGGAGGGGATGGCAACAGAGCGGAGGAGGCTAGCAAAGACAAAGAAG	1	5 Base Changes	VKSATFSSTESTASGMQDEVRAVGEEQRSEEPKRRVDTSVSWEALICVGSSKKRARKESSSDDEGGPRTLGGDGNRAEEASKDKE	VKSATLSSTESTASGMQDEVRAVGEEQRSEEPKRRVDTSVSWEALICVGSSKKRARKASSSDDEGGPRTLGGDGHRAEEASKDKE
GTCAAGAGTGCAACCATGTCCTCAACGGAGAGCACGGCGTCTGGAATGCAGGATGAGGTCAGAGCGGTTGGCGAGGAGCAAAGGTCAGAGGAGCCAAAGCGCAGGGTGGATACTTCAGTGTCTTGGGAGGCGTTGATTTGTGTCGGATCGTCCAAGAAGAGAGCGAGGAAGGCATCCTCTTCAGATGATGAAGGAGGGCCAAGAACACTGGGAGGGGATGGCCACAGAGCGGAGGAGGCTAGCAAAGACAAAGAAG	GTCAAGAGTGCAACCATGTCCTCAACGGAGAGCACGGCGTCTGGAATGCAGGATGAGGTCAGAGCGGTTGGCGAGGAGCAAAGGTCAGAGGAGCCAAAGCGCAGGGTGGATACTTCAGTGTCTTGGGAGGCGTTGATTTGTGTCGGATCGTCCAAGAAGAGAGCGAGGAAGGCATCCTCTTCAGATGATGAAGGAGGGCCAAGAACACTGGGAGGGGATGGCCACAGAGCGGAGGAGGCTAGCAAAGACAAAGAAG	1	3 Base Changes	VKSATMSSTESTASGMQDEVRAVGEEQRSEEPKRRVDTSVSWEALICVGSSKKRARKASSSDDEGGPRTLGGDGHRAEEASKDKE	VKSATLSSTESTASGMQDEVRAVGEEQRSEEPKRRVDTSVSWEALICVGSSKKRARKASSSDDEGGPRTLGGDGHRAEEASKDKE
GTCAAGAGTGCAACCGTGTCCTCCACGGAGAGCACGGCGTCTGGAATGCAGGATGAGGTCAGAGCGGTTGGCGAGGAGCAAAGGTCAGAGGAGCCAAAGCGCAGGGTGGATACTTCAGTGTCTTGGGAGGCGTTGATTTGTGTCGGATCGTCCAAGAAGAGAGCGAGGAAGGCATCCTCTTCAGATGATGAAGGAGGGCCAAGAACACTGGGAGGGGATGGCCACAGAGCGGAGGAGGCTAGCAAAGACAAAGAAG	GTCAAGAGTGCAACCGTGTCCTCCACGGAGAGCACGGCGTCTGGAATGCAGGATGAGGTCAGAGCGGTTGGCGAGGAGCAAAGGTCAGAGGAGCCAAAGCGCAGGGTGGATACTTCAGTGTCTTGGGAGGCGTTGATTTGTGTCGGATCGTCCAAGAAGAGAGCGAGGAAGGCATCCTCTTCAGATGATGAAGGAGGGCCAAGAACACTGGGAGGGGATGGCCACAGAGCGGAGGAGGCTAGCAAAGACAAAGAAG	1	2 Base Changes	VKSATVSSTESTASGMQDEVRAVGEEQRSEEPKRRVDTSVSWEALICVGSSKKRARKASSSDDEGGPRTLGGDGHRAEEASKDKE	VKSATLSSTESTASGMQDEVRAVGEEQRSEEPKRRVDTSVSWEALICVGSSKKRARKASSSDDEGGPRTLGGDGHRAEEASKDKE
GTCAAGAGTGCAACCTAGTCCTCCACGGAGAGCACGGCGTCTGGAATGCAGGATGAGGTCAGGGCGGTTGGCGAGGAGCAAAGGTCAGAGGAGCCAAAGCGCAGGGTGGATACTTCAGTGTCTTGGGAGGCGTTGATTTGTGTCGGATCGTCCAAGAAGAGAGCGATGAATGCATCCTCTTCAGATGATGAAGGAGGGCCAAGAACACTGGGAGGGGATGGCAACAGAGCGGAGGAGGCTAGCAAAGACAAAGAAG	GTCAAGAGTGCAACCTAGTCCTCCACGGAGAGCACGGCGTCTGGAATGCAGGATGAGGTCAGGGCGGTTGGCGAGGAGCAAAGGTCAGAGGAGCCAAAGCGCAGGGTGGATACTTCAGTGTCTTGGGAGGCGTTGATTTGTGTCGGATCGTCCAAGAAGAGAGCGATGAATGCATCCTCTTCAGATGATGAAGGAGGGCCAAGAACACTGGGAGGGGATGGCAACAGAGCGGAGGAGGCTAGCAAAGACAAAGAAG	1	6 Base Changes	VKSAT*	VKSATLSSTESTASGMQDEVRAVGEEQRSEEPKRRVDTSVSWEALICVGSSKKRARKASSSDDEGGPRTLGGDGHRAEEASKDKE
GTCAAGAGTGCAACCTGGTCCTCCACGGAGAGCACGTCGTCTGGAATGCAGGATGAGGTCAGAGCGGCTGGCGAGGAGCAAAGGTCAGAGGAGCCAAAGCGCAGGGTGGATACTTCAGTGTCTTGGGAGGCGTTGTTTTGTGTCGGATCGTCCAAGAAGAGAGAGAGGAAGGCATCCTCTTCTGATGATGAAGGAGGGCCAAGAACACTGGGAGGGGATGGCCACAGAGCGGAGGAGGCTAGCAAAGACAAAGAAG	GTCAAGAGTGCAACCTGGTCCTCCACGGAGAGCACGTCGTCTGGAATGCAGGATGAGGTCAGAGCGGCTGGCGAGGAGCAAAGGTCAGAGGAGCCAAAGCGCAGGGTGGATACTTCAGTGTCTTGGGAGGCGTTGTTTTGTGTCGGATCGTCCAAGAAGAGAGAGAGGAAGGCATCCTCTTCTGATGATGAAGGAGGGCCAAGAACACTGGGAGGGGATGGCCACAGAGCGGAGGAGGCTAGCAAAGACAAAGAAG	1	7 Base Changes	VKSATWSSTESTSSGMQDEVRAAGEEQRSEEPKRRVDTSVSWEALFCVGSSKKRERKASSSDDEGGPRTLGGDGHRAEEASKDKE	VKSATLSSTESTASGMQDEVRAVGEEQRSEEPKRRVDTSVSWEALICVGSSKKRARKASSSDDEGGPRTLGGDGHRAEEASKDKE
GTCAAGAGTGCAACCTTGTACACCACGGAGAGCACGGCGTCTTGAATGCAGGATGAGGTCAGAGCGGTTGGCGAGGAGCAAAGGTCAGAGGAGCCAAAGCGCAGGGTGGATACTTCAGTGTCTTGGGAGGCGTTGATTTGTGTCGGATCGTCCAAGAAGAGAGCGAGGAAGGCATCCTCTTCAGATGATGAAGGAGGGCCAAGAACACTGGGAGGGGATGGCCACAGAGCGGAGGAGGCTAGCAAAGACAAAGAAG	GTCAAGAGTGCAACCTTGTACACCACGGAGAGCACGGCGTCTTGAATGCAGGATGAGGTCAGAGCGGTTGGCGAGGAGCAAAGGTCAGAGGAGCCAAAGCGCAGGGTGGATACTTCAGTGTCTTGGGAGGCGTTGATTTGTGTCGGATCGTCCAAGAAGAGAGCGAGGAAGGCATCCTCTTCAGATGATGAAGGAGGGCCAAGAACACTGGGAGGGGATGGCCACAGAGCGGAGGAGGCTAGCAAAGACAAAGAAG	1	4 Base Changes	VKSATLYTTESTAS*	VKSATLSSTESTASGMQDEVRAVGEEQRSEEPKRRVDTSVSWEALICVGSSKKRARKASSSDDEGGPRTLGGDGHRAEEASKDKE
GTCAAGAGTGCAACCTTGTACTCCACGGAGAGCACGGCGTCTGGAATGCAGGATGAGGTCAGAGCGGTTTGCGAGGAGCAAAGGTCAGAGGAGCCAAGGCGCAGGGTGGATACTTCAGTGTATTGGGAGGCGTTGATTTGTGTCGGATCGTCCAAGAAGAGAGCGAGGAAGGCATCCTCTTCAGATGATGAAGGAGGGCCAAGAACACTTGGAGGGGATGGCCACAGAGCGGAGGAGGCTAGCAAAGACAAAGAAG	GTCAAGAGTGCAACCTTGTACTCCACGGAGAGCACGGCGTCTGGAATGCAGGATGAGGTCAGAGCGGTTTGCGAGGAGCAAAGGTCAGAGGAGCCAAGGCGCAGGGTGGATACTTCAGTGTATTGGGAGGCGTTGATTTGTGTCGGATCGTCCAAGAAGAGAGCGAGGAAGGCATCCTCTTCAGATGATGAAGGAGGGCCAAGAACACTTGGAGGGGATGGCCACAGAGCGGAGGAGGCTAGCAAAGACAAAGAAG	1	6 Base Changes	VKSATLYSTESTASGMQDEVRAVCEEQRSEEPRRRVDTSVYWEALICVGSSKKRARKASSSDDEGGPRTLGGDGHRAEEASKDKE	VKSATLSSTESTASGMQDEVRAVGEEQRSEEPKRRVDTSVSWEALICVGSSKKRARKASSSDDEGGPRTLGGDGHRAEEASKDKE
GTCAAGAGTGCAACCTTGTCAACCACGGAGAGCACGGCGTCTGGAATGCAGGATGAGGTCAGAGCGGTTGGCGAGGAGCAAAGGTCAGAGGAGCCAAAGCGCAGTGTGGATACTTCAGTGTCTTGGGAGGCGTTGATTTGTGTCGGATCGTCCAAGAAGAGAGCGAGGAAGGCATCCTCTTCAGATGATGAAGGAGGGCCAAGAACACTGGGAGGGGATGGCCACAGAGCGGAGGAGGCTAGCAAAGACAAAGAAG	GTCAAGAGTGCAACCTTGTCAACCACGGAGAGCACGGCGTCTGGAATGCAGGATGAGGTCAGAGCGGTTGGCGAGGAGCAAAGGTCAGAGGAGCCAAAGCGCAGTGTGGATACTTCAGTGTCTTGGGAGGCGTTGATTTGTGTCGGATCGTCCAAGAAGAGAGCGAGGAAGGCATCCTCTTCAGATGATGAAGGAGGGCCAAGAACACTGGGAGGGGATGGCCACAGAGCGGAGGAGGCTAGCAAAGACAAAGAAG	1	4 Base Changes	VKSATLSTTESTASGMQDEVRAVGEEQRSEEPKRSVDTSVSWEALICVGSSKKRARKASSSDDEGGPRTLGGDGHRAEEASKDKE	VKSATLSSTESTASGMQDEVRAVGEEQRSEEPKRRVDTSVSWEALICVGSSKKRARKASSSDDEGGPRTLGGDGHRAEEASKDKE
GTCAAGAGTGCAACCTTGTCATCCACGGAGAGCACGGCGTCTGTAATGCAGGATGAGGTCAGAGCGGTTGGAGAGGAGCAAAGGTCAGAGGAGCCAAAGCGCAGGGTGGATACTTCAGTGTCTTGGGAGGCGTTTATTTGTGTCGGATCGTCGAAGAAGAGAGCGAGGAAGGCATCCTCTTCAGATGATGAAGGAGGGCCAAGAACACTGGTAGGGGATGGCCACAGAGCGGAGGAGGCTAGCAAAGAAAAAGAAG	GTCAAGAGTGCAACCTTGTCATCCACGGAGAGCACGGCGTCTGTAATGCAGGATGAGGTCAGAGCGGTTGGAGAGGAGCAAAGGTCAGAGGAGCCAAAGCGCAGGGTGGATACTTCAGTGTCTTGGGAGGCGTTTATTTGTGTCGGATCGTCGAAGAAGAGAGCGAGGAAGGCATCCTCTTCAGATGATGAAGGAGGGCCAAGAACACTGGTAGGGGATGGCCACAGAGCGGAGGAGGCTAGCAAAGAAAAAGAAG	1	8 Base Changes	VKSATLSSTESTASVMQDEVRAVGEEQRSEEPKRRVDTSVSWEAFICVGSSKKRARKASSSDDEGGPRTLVGDGHRAEEASKEKE	VKSATLSSTESTASGMQDEVRAVGEEQRSEEPKRRVDTSVSWEALICVGSSKKRARKASSSDDEGGPRTLGGDGHRAEEASKDKE
GTCAAGAGTGCAACCTTGTCCTACACGGAGAGCACGGCGTCTGGAATGCAGGATGAGGTCAGAGCGGTTGGCGAGGAGCAAAGGTCAGAGGAGCCAAAGCGCAGGGTGGATACTTCAGTGTCTTGGGAGGCGTTGATTTGTGTCGGATCGTCCAAGAAGAGAGCGAGGAAGGCATCCTCTTCAGATGATGAAGGAGGGCCAAGAACACTGGGAGGGGATGGCCACAGAGCGGAGGAGGCTAGCAAAGACAAAGAAG	GTCAAGAGTGCAACCTTGTCCTACACGGAGAGCACGGCGTCTGGAATGCAGGATGAGGTCAGAGCGGTTGGCGAGGAGCAAAGGTCAGAGGAGCCAAAGCGCAGGGTGGATACTTCAGTGTCTTGGGAGGCGTTGATTTGTGTCGGATCGTCCAAGAAGAGAGCGAGGAAGGCATCCTCTTCAGATGATGAAGGAGGGCCAAGAACACTGGGAGGGGATGGCCACAGAGCGGAGGAGGCTAGCAAAGACAAAGAAG	1	2 Base Changes	VKSATLSYTESTASGMQDEVRAVGEEQRSEEPKRRVDTSVSWEALICVGSSKKRARKASSSDDEGGPRTLGGDGHRAEEASKDKE	VKSATLSSTESTASGMQDEVRAVGEEQRSEEPKRRVDTSVSWEALICVGSSKKRARKASSSDDEGGPRTLGGDGHRAEEASKDKE
GTCAAGAGTGCAACCTTGTCCTCCACGGAGAGAACGGCGTCTGGAATGCAGGATGAGGTCAGAGCGGTTGGCGAGGAGCAAAGGTCAGAGGAGCCAAAGCGCTGGGTGGATACTTCATTGTCTTGGGAGGCGTTGATTTGTGTCGGATCGTCCAAGAAGAGAGCGAGGAAGGCATCCTCTTAAGATGATGAAGGAGGGCCAAGAACACTGGGAGGGGATGGCCACAGAGCGGAGGAGGCTAGCAAAGACAAAGAAG	GTCAAGAGTGCAACCTTGTCCTCCACGGAGAGAACGGCGTCTGGAATGCAGGATGAGGTCAGAGCGGTTGGCGAGGAGCAAAGGTCAGAGGAGCCAAAGCGCTGGGTGGATACTTCATTGTCTTGGGAGGCGTTGATTTGTGTCGGATCGTCCAAGAAGAGAGCGAGGAAGGCATCCTCTTAAGATGATGAAGGAGGGCCAAGAACACTGGGAGGGGATGGCCACAGAGCGGAGGAGGCTAGCAAAGACAAAGAAG	1	5 Base Changes	VKSATLSSTERTASGMQDEVRAVGEEQRSEEPKRWVDTSLSWEALICVGSSKKRARKASS*	VKSATLSSTESTASGMQDEVRAVGEEQRSEEPKRRVDTSVSWEALICVGSSKKRARKASSSDDEGGPRTLGGDGHRAEEASKDKE
GTCAAGAGTGCAACCTTGTCCTCCACGGAGAGCACGGAGTCTGGAATGCAGGATGAGGTCAGAGCGGTTGGCGAGGAGCAAAGGTCAGAGGAGCCAAAGCACAGGGTGGATACTTCAGTGTCTTGGGAGGCGTTGATTTGTGTCGGATCGTCCAAGAAGAGAGCGAGGAAGGCATCCTCTTCAGATGATGAAGGAGGGCCAAGAACACTGGGAGGGGATGGCCACAGAGCGGAGGAGGCTAGCAAAGACAAAGAAG	GTCAAGAGTGCAACCTTGTCCTCCACGGAGAGCACGGAGTCTGGAATGCAGGATGAGGTCAGAGCGGTTGGCGAGGAGCAAAGGTCAGAGGAGCCAAAGCACAGGGTGGATACTTCAGTGTCTTGGGAGGCGTTGATTTGTGTCGGATCGTCCAAGAAGAGAGCGAGGAAGGCATCCTCTTCAGATGATGAAGGAGGGCCAAGAACACTGGGAGGGGATGGCCACAGAGCGGAGGAGGCTAGCAAAGACAAAGAAG	1	3 Base Changes	VKSATLSSTESTESGMQDEVRAVGEEQRSEEPKHRVDTSVSWEALICVGSSKKRARKASSSDDEGGPRTLGGDGHRAEEASKDKE	VKSATLSSTESTASGMQDEVRAVGEEQRSEEPKRRVDTSVSWEALICVGSSKKRARKASSSDDEGGPRTLGGDGHRAEEASKDKE
GTCAAGAGTGCAACCTTGTCCTCCACGGAGAGCACGGCGTCTGGAATGCAGGATAAGGTCAGAGCGGTTGGCGAGGAGCAAAGGTCAGAGGAGCCAAAGCGCAGGGTGGATACTTCAGTGTCTTGGGAGGCGTTGATTTGTGTCGGATCGTCCAAGAAGAGAGCGAGGAAGGCATCCTCTTCAGATGATGAAGGAGGGCCAAGAACACTGGGAGGGGATGGCCACAGAGCGGAGGAGGCTAGCAAAGACAAAGAAG	GTCAAGAGTGCAACCTTGTCCTCCACGGAGAGCACGGCGTCTGGAATGCAGGATAAGGTCAGAGCGGTTGGCGAGGAGCAAAGGTCAGAGGAGCCAAAGCGCAGGGTGGATACTTCAGTGTCTTGGGAGGCGTTGATTTGTGTCGGATCGTCCAAGAAGAGAGCGAGGAAGGCATCCTCTTCAGATGATGAAGGAGGGCCAAGAACACTGGGAGGGGATGGCCACAGAGCGGAGGAGGCTAGCAAAGACAAAGAAG	1	2 Base Changes	VKSATLSSTESTASGMQDKVRAVGEEQRSEEPKRRVDTSVSWEALICVGSSKKRARKASSSDDEGGPRTLGGDGHRAEEASKDKE	VKSATLSSTESTASGMQDEVRAVGEEQRSEEPKRRVDTSVSWEALICVGSSKKRARKASSSDDEGGPRTLGGDGHRAEEASKDKE
GTCAAGAGTGCAACCTTGTCCTCCACGGAGAGCACGGCGTCTGGAATGCAGGATGAGGTCAGAGCGGTTGGCGAGGAGCAAAGGTCAGAGGAGCCAAAGCGCAGGGTGGATACTTCAGTGTCTTGGGAGGAGTTGATTTGTGTCGGATCGTCCAAGAAGAGAGCGAGGAAGGCATCATCTTCAGATGATGAAGGAGGGCCAATAACACTGGGAGGGGATGGACACAGAGCGGAGGAGGCTAGCAAAGACAAAGAAG	GTCAAGAGTGCAACCTTGTCCTCCACGGAGAGCACGGCGTCTGGAATGCAGGATGAGGTCAGAGCGGTTGGCGAGGAGCAAAGGTCAGAGGAGCCAAAGCGCAGGGTGGATACTTCAGTGTCTTGGGAGGAGTTGATTTGTGTCGGATCGTCCAAGAAGAGAGCGAGGAAGGCATCATCTTCAGATGATGAAGGAGGGCCAATAACACTGGGAGGGGATGGACACAGAGCGGAGGAGGCTAGCAAAGACAAAGAAG	1	5 Base Changes	VKSATLSSTESTASGMQDEVRAVGEEQRSEEPKRRVDTSVSWEELICVGSSKKRARKASSSDDEGGPITLGGDGHRAEEASKDKE	VKSATLSSTESTASGMQDEVRAVGEEQRSEEPKRRVDTSVSWEALICVGSSKKRARKASSSDDEGGPRTLGGDGHRAEEASKDKE
GTCAAGAGTGCAACCTTGTCCTCCACGGAGAGCACGGCGTCTGGAATGCAGGATGAGGTCAGAGCGGTTGGCGAGGAGCAAAGGTCAGAGGAGCCAAAGCGCAGGGTGGATACTTCAGTGTCTTGGGAGGCGTTGATTTGTGACGGATCGTCCAAGAAGAGAGCGAGGAAGGCATCCTCTTCAGATGATGAAGGAGGGCCAAGAACACTGGGAGGGGATGGCCACAGAGCGGAGGAGGCTAGCAAAGACAAAGAAG	GTCAAGAGTGCAACCTTGTCCTCCACGGAGAGCACGGCGTCTGGAATGCAGGATGAGGTCAGAGCGGTTGGCGAGGAGCAAAGGTCAGAGGAGCCAAAGCGCAGGGTGGATACTTCAGTGTCTTGGGAGGCGTTGATTTGTGACGGATCGTCCAAGAAGAGAGCGAGGAAGGCATCCTCTTCAGATGATGAAGGAGGGCCAAGAACACTGGGAGGGGATGGCCACAGAGCGGAGGAGGCTAGCAAAGACAAAGAAG	1	2 Base Changes	VKSATLSSTESTASGMQDEVRAVGEEQRSEEPKRRVDTSVSWEALICDGSSKKRARKASSSDDEGGPRTLGGDGHRAEEASKDKE	VKSATLSSTESTASGMQDEVRAVGEEQRSEEPKRRVDTSVSWEALICVGSSKKRARKASSSDDEGGPRTLGGDGHRAEEASKDKE
GTCAAGAGTGCAACCTTGTCCTCCACGGAGAGCACGGCGTCTGGAATGCAGGATGAGGTCAGAGCGGTTGGCGAGGAGCAAAGGTCAGAGGAGCCAAAGCGCAGGGTGGATACTTCAGTGTCTTGGGAGGCGTTGATTTGTGTCGGATCGTCCAAGAAGAGAGCGAGGAAGGCATCCTCTTCAGATGATGAAGGAGGGCCAAGAACACTGGGAGGGGATGGCCACAGAGCGGAGGAGGCTAGCAAAGCCAAAGAAG	GTCAAGAGTGCAACCTTGTCCTCCACGGAGAGCACGGCGTCTGGAATGCAGGATGAGGTCAGAGCGGTTGGCGAGGAGCAAAGGTCAGAGGAGCCAAAGCGCAGGGTGGATACTTCAGTGTCTTGGGAGGCGTTGATTTGTGTCGGATCGTCCAAGAAGAGAGCGAGGAAGGCATCCTCTTCAGATGATGAAGGAGGGCCAAGAACACTGGGAGGGGATGGCCACAGAGCGGAGGAGGCTAGCAAAGCCAAAGAAG	1	2 Base Changes	VKSATLSSTESTASGMQDEVRAVGEEQRSEEPKRRVDTSVSWEALICVGSSKKRARKASSSDDEGGPRTLGGDGHRAEEASKAKE	VKSATLSSTESTASGMQDEVRAVGEEQRSEEPKRRVDTSVSWEALICVGSSKKRARKASSSDDEGGPRTLGGDGHRAEEASKDKE
GTCAAGAGTGCAACCTTGTCCTCCACGGAGAGCACGGCGTCTGGAATGCAGGATGAGGTCAGAGCGGTTGGCGAGGAGCAAAGGTCAGAGGAGCCAAAGCGCAGGGTGGATACTTCAGTGTCTTGGGAGGCGTTGATTTGTGTCGGATCGTCCAAGAAGAGAGCGAGGAAGGCATCCTCTTCAGATGATGAAGGAGGGCCAAGAACACTGGGAGGGGATGGCCACAGAGCGGAGGAGGCTAGCAAAGGCAAAGAAG	GTCAAGAGTGCAACCTTGTCCTCCACGGAGAGCACGGCGTCTGGAATGCAGGATGAGGTCAGAGCGGTTGGCGAGGAGCAAAGGTCAGAGGAGCCAAAGCGCAGGGTGGATACTTCAGTGTCTTGGGAGGCGTTGATTTGTGTCGGATCGTCCAAGAAGAGAGCGAGGAAGGCATCCTCTTCAGATGATGAAGGAGGGCCAAGAACACTGGGAGGGGATGGCCACAGAGCGGAGGAGGCTAGCAAAGGCAAAGAAG	1	2 Base Changes	VKSATLSSTESTASGMQDEVRAVGEEQRSEEPKRRVDTSVSWEALICVGSSKKRARKASSSDDEGGPRTLGGDGHRAEEASKGKE	VKSATLSSTESTASGMQDEVRAVGEEQRSEEPKRRVDTSVSWEALICVGSSKKRARKASSSDDEGGPRTLGGDGHRAEEASKDKE
GTCAAGAGTGCAACCTTGTCCTCCACGGAGAGCACGGCGTCTGGAATGCAGGATGAGGTCAGAGCGGTTGGCGAGGAGCAAAGGTCAGAGGAGCCAAAGCGCAGGGTGGATACTTCAGTGTCTTGGGAGGCGTTGATTTGTGTCGGATCGTCCAAGAAGAGAGCGAGGAAGGCATCCTCTTCAGATGATGAAGGAGGGCCAAGAACACTGGGAGGGGATGGCCACAGAGCGGAGGAGGCTATCAAAGACAAAGAAG	GTCAAGAGTGCAACCTTGTCCTCCACGGAGAGCACGGCGTCTGGAATGCAGGATGAGGTCAGAGCGGTTGGCGAGGAGCAAAGGTCAGAGGAGCCAAAGCGCAGGGTGGATACTTCAGTGTCTTGGGAGGCGTTGATTTGTGTCGGATCGTCCAAGAAGAGAGCGAGGAAGGCATCCTCTTCAGATGATGAAGGAGGGCCAAGAACACTGGGAGGGGATGGCCACAGAGCGGAGGAGGCTATCAAAGACAAAGAAG	1	2 Base Changes	VKSATLSSTESTASGMQDEVRAVGEEQRSEEPKRRVDTSVSWEALICVGSSKKRARKASSSDDEGGPRTLGGDGHRAEEAIKDKE	VKSATLSSTESTASGMQDEVRAVGEEQRSEEPKRRVDTSVSWEALICVGSSKKRARKASSSDDEGGPRTLGGDGHRAEEASKDKE
GTCAAGAGTGCAACCTTGTCCTCCACGGAGAGCACGGCGTCTGGAATGCAGGATGAGGTCAGAGCGGTTGGCGAGGAGCAAAGGTCAGAGGAGCCAAAGCGCAGGGTGGATACTTCAGTGTCTTGGGAGGCGTTGATTTGTGTCGGATCGTCCAAGAAGAGAGCGAGGAAGGCATCCTCTTCAGATGATGAAGGAGGGCCAAGAACACTGGGAGGGGATGGCCATAGAGCGGAGGAGGCTAGCAAAGACAAAGAAG	GTCAAGAGTGCAACCTTGTCCTCCACGGAGAGCACGGCGTCTGGAATGCAGGATGAGGTCAGAGCGGTTGGCGAGGAGCAAAGGTCAGAGGAGCCAAAGCGCAGGGTGGATACTTCAGTGTCTTGGGAGGCGTTGATTTGTGTCGGATCGTCCAAGAAGAGAGCGAGGAAGGCATCCTCTTCAGATGATGAAGGAGGGCCAAGAACACTGGGAGGGGATGGCCATAGAGCGGAGGAGGCTAGCAAAGACAAAGAAG	1	2 Base Changes	VKSATLSSTESTASGMQDEVRAVGEEQRSEEPKRRVDTSVSWEALICVGSSKKRARKASSSDDEGGPRTLGGDGHRAEEASKDKE	VKSATLSSTESTASGMQDEVRAVGEEQRSEEPKRRVDTSVSWEALICVGSSKKRARKASSSDDEGGPRTLGGDGHRAEEASKDKE
GTCAAGAGTGCAACCTTGTCCTCCACGGAGAGCACGGCGTCTGGAATGCAGGATGAGGTCAGAGCGGTTGGCGAGGAGCAAAGGTCAGAGGAGCCAAAGCGCAGGGTGGATACTTCAGTGTCTTGGGAGGCGTTGATTTGTGTCGGATCGTCCAAGAAGAGAGCGAGGAAGGCATCCTCTTCAGATGATGAAGGAGGGCCAAGAACACTGGGAGGGGATGTCCACAGAGCGGAGGAGGCTAGCAAAGACAAAGAAG	GTCAAGAGTGCAACCTTGTCCTCCACGGAGAGCACGGCGTCTGGAATGCAGGATGAGGTCAGAGCGGTTGGCGAGGAGCAAAGGTCAGAGGAGCCAAAGCGCAGGGTGGATACTTCAGTGTCTTGGGAGGCGTTGATTTGTGTCGGATCGTCCAAGAAGAGAGCGAGGAAGGCATCCTCTTCAGATGATGAAGGAGGGCCAAGAACACTGGGAGGGGATGTCCACAGAGCGGAGGAGGCTAGCAAAGACAAAGAAG	1	2 Base Changes	VKSATLSSTESTASGMQDEVRAVGEEQRSEEPKRRVDTSVSWEALICVGSSKKRARKASSSDDEGGPRTLGGDVHRAEEASKDKE	VKSATLSSTESTASGMQDEVRAVGEEQRSEEPKRRVDTSVSWEALICVGSSKKRARKASSSDDEGGPRTLGGDGHRAEEASKDKE
GTCAAGAGTGCAACCTTGTCCTCCACGGAGAGCACGGCGTCTGGAATGCAGGATGAGGTCAGAGCGGTTGGCGAGGAGCAAAGGTCAGAGGAGCCAAAGCGCAGGGTGGATACTTCAGTGTCTTGGGAGGCGTTGATTTGTGTCGGATCGTCCAAGAAGAGAGCGAGGAAGGCATCCTCTTCAGATGATGAAGGAGGGCCAAGAACACTGGGAGGGGGTGGCCACAGAGCGGAGGAGGCTAGCAAAGACAAAGAAG	GTCAAGAGTGCAACCTTGTCCTCCACGGAGAGCACGGCGTCTGGAATGCAGGATGAGGTCAGAGCGGTTGGCGAGGAGCAAAGGTCAGAGGAGCCAAAGCGCAGGGTGGATACTTCAGTGTCTTGGGAGGCGTTGATTTGTGTCGGATCGTCCAAGAAGAGAGCGAGGAAGGCATCCTCTTCAGATGATGAAGGAGGGCCAAGAACACTGGGAGGGGGTGGCCACAGAGCGGAGGAGGCTAGCAAAGACAAAGAAG	1	2 Base Changes	VKSATLSSTESTASGMQDEVRAVGEEQRSEEPKRRVDTSVSWEALICVGSSKKRARKASSSDDEGGPRTLGGGGHRAEEASKDKE	VKSATLSSTESTASGMQDEVRAVGEEQRSEEPKRRVDTSVSWEALICVGSSKKRARKASSSDDEGGPRTLGGDGHRAEEASKDKE
GTCAAGAGTGCAACCTTGTCCTCCACGGAGAGCACGGCGTCTGGAATGCAGGATGAGGTCAGAGCGGTTGGCGAGGAGCAAAGGTCAGAGGAGCCAAAGCGCAGGGTGGATACTTCAGTGTCTTGGGAGGCGTTGATTTGTGTCGGATCGTCCAAGAAGAGAGCGAGGAAGGCATCCTCTTCAGATGATGAAGGAGGGCCAAGAACACTGGGAGGGTATGGCCACAGAGCGGAGGAGGCTAGCAAAGACAAAGAAG	GTCAAGAGTGCAACCTTGTCCTCCACGGAGAGCACGGCGTCTGGAATGCAGGATGAGGTCAGAGCGGTTGGCGAGGAGCAAAGGTCAGAGGAGCCAAAGCGCAGGGTGGATACTTCAGTGTCTTGGGAGGCGTTGATTTGTGTCGGATCGTCCAAGAAGAGAGCGAGGAAGGCATCCTCTTCAGATGATGAAGGAGGGCCAAGAACACTGGGAGGGTATGGCCACAGAGCGGAGGAGGCTAGCAAAGACAAAGAAG	1	2 Base Changes	VKSATLSSTESTASGMQDEVRAVGEEQRSEEPKRRVDTSVSWEALICVGSSKKRARKASSSDDEGGPRTLGGYGHRAEEASKDKE	VKSATLSSTESTASGMQDEVRAVGEEQRSEEPKRRVDTSVSWEALICVGSSKKRARKASSSDDEGGPRTLGGDGHRAEEASKDKE
GTCAAGAGTGCAACCTTGTCCTCCACGGAGAGCACGGCGTCTGGAATGCAGGATGAGGTCAGAGCGGTTGGCGAGGAGCAAAGGTCAGAGGAGCCAAAGCGCAGGGTGGATACTTCATTGTCTTGGGAGGCGTTGATTTGTGTCGGATCGTCCAAGAAGAGAGAGAGGAAGGCATCCTCTTCAGATGATGAAGGAGGGCCAAGAACACTGGGAGGGGATGGCCACAGAGCGGAGGAGGCTAGCAAAGACAAAGAAG	GTCAAGAGTGCAACCTTGTCCTCCACGGAGAGCACGGCGTCTGGAATGCAGGATGAGGTCAGAGCGGTTGGCGAGGAGCAAAGGTCAGAGGAGCCAAAGCGCAGGGTGGATACTTCATTGTCTTGGGAGGCGTTGATTTGTGTCGGATCGTCCAAGAAGAGAGAGAGGAAGGCATCCTCTTCAGATGATGAAGGAGGGCCAAGAACACTGGGAGGGGATGGCCACAGAGCGGAGGAGGCTAGCAAAGACAAAGAAG	1	3 Base Changes	VKSATLSSTESTASGMQDEVRAVGEEQRSEEPKRRVDTSLSWEALICVGSSKKRERKASSSDDEGGPRTLGGDGHRAEEASKDKE	VKSATLSSTESTASGMQDEVRAVGEEQRSEEPKRRVDTSVSWEALICVGSSKKRARKASSSDDEGGPRTLGGDGHRAEEASKDKE
GTCAAGAGTGCAACCTTGTCCTCCACGGAGAGCACGGCGTCTGGAATGCAGGATGAGGTCAGAGCGGTTGGCGAGGAGCAAAGGTCAGAGGAGCCAAAGCGCATGGTGGATACTTCAGTGTCTTGGGAGGCGTTGATTTGTGTCGGATCGTCCAAGAAGAGAGCGAGGAAGGCATCCTCTTCAGATGATGAAGGAGGGCCAAGAACACTGGGAGGGGCTGGCCACAGAGCGGCGGAGGCTAGCAAAGACAAAGAAG	GTCAAGAGTGCAACCTTGTCCTCCACGGAGAGCACGGCGTCTGGAATGCAGGATGAGGTCAGAGCGGTTGGCGAGGAGCAAAGGTCAGAGGAGCCAAAGCGCATGGTGGATACTTCAGTGTCTTGGGAGGCGTTGATTTGTGTCGGATCGTCCAAGAAGAGAGCGAGGAAGGCATCCTCTTCAGATGATGAAGGAGGGCCAAGAACACTGGGAGGGGCTGGCCACAGAGCGGCGGAGGCTAGCAAAGACAAAGAAG	1	4 Base Changes	VKSATLSSTESTASGMQDEVRAVGEEQRSEEPKRMVDTSVSWEALICVGSSKKRARKASSSDDEGGPRTLGGAGHRAAEASKDKE	VKSATLSSTESTASGMQDEVRAVGEEQRSEEPKRRVDTSVSWEALICVGSSKKRARKASSSDDEGGPRTLGGDGHRAEEASKDKE
GTCAAGAGTGCAACCTTGTCCTCCACGGAGAGCACGGCGTCTGGAATGCAGGATGAGGTCAGAGCGGTTGGCGAGGAGCAAATGTCAGAGGAGCCAAAGCGCAGGGTGGATACTTCAGTGTCTTGGGAGGCGTTGATTTGTGTCGGATCGTACAAGAAGAGAGCGAGGAAGGCATCCTCTTCAGATGATGAAGGAGGGCCAAGAACACTGGGAGGGGATGGCCACAGAGCGGAGGAGGCTAGCAAAGACAAAGAAG	GTCAAGAGTGCAACCTTGTCCTCCACGGAGAGCACGGCGTCTGGAATGCAGGATGAGGTCAGAGCGGTTGGCGAGGAGCAAATGTCAGAGGAGCCAAAGCGCAGGGTGGATACTTCAGTGTCTTGGGAGGCGTTGATTTGTGTCGGATCGTACAAGAAGAGAGCGAGGAAGGCATCCTCTTCAGATGATGAAGGAGGGCCAAGAACACTGGGAGGGGATGGCCACAGAGCGGAGGAGGCTAGCAAAGACAAAGAAG	1	3 Base Changes	VKSATLSSTESTASGMQDEVRAVGEEQMSEEPKRRVDTSVSWEALICVGSYKKRARKASSSDDEGGPRTLGGDGHRAEEASKDKE	VKSATLSSTESTASGMQDEVRAVGEEQRSEEPKRRVDTSVSWEALICVGSSKKRARKASSSDDEGGPRTLGGDGHRAEEASKDKE
GTCAAGAGTGCAACCTTGTCCTCCACGGAGAGCACGGCGTCTGGAATGCAGGATGAGGTCAGAGCTGTTGGCGAGGAGCAAAGGTCAGAGGAGCCAAAGCGCAGGGTGGATACTTCAGTGTCTTGGGAGGCGTTGATTTGTGTCGGATCGTCCAAGAAGAGAGCGAGGAAGGCATCCTCTTCAGATGATGAAGGATGGCCAAGAACACTGGGAGGGGATGGCCACAGAGCGGAGGAGGCTAGCAAAGACAAAGAAG	GTCAAGAGTGCAACCTTGTCCTCCACGGAGAGCACGGCGTCTGGAATGCAGGATGAGGTCAGAGCTGTTGGCGAGGAGCAAAGGTCAGAGGAGCCAAAGCGCAGGGTGGATACTTCAGTGTCTTGGGAGGCGTTGATTTGTGTCGGATCGTCCAAGAAGAGAGCGAGGAAGGCATCCTCTTCAGATGATGAAGGATGGCCAAGAACACTGGGAGGGGATGGCCACAGAGCGGAGGAGGCTAGCAAAGACAAAGAAG	1	3 Base Changes	VKSATLSSTESTASGMQDEVRAVGEEQRSEEPKRRVDTSVSWEALICVGSSKKRARKASSSDDEGWPRTLGGDGHRAEEASKDKE	VKSATLSSTESTASGMQDEVRAVGEEQRSEEPKRRVDTSVSWEALICVGSSKKRARKASSSDDEGGPRTLGGDGHRAEEASKDKE
GTCAAGAGTGCAACCTTGTCCTCCACGGAGAGCACGGCGTCTGGAATGCAGTATGAGGTCAGAGCGGTTGGCGAGGAGCAAAGGTCAGAGGAGCCAAAGCGCAGGGTGGATACTTCAGTGTCTTGGGAGGCGTTGATTTGTGTCGGATCGTCCAAGAAGAGAGCGAGGAAGGCATCCTCTTCAGATGATGAAGGAGGGCCAAGAACACTGGGAGGGGATGGCCACAGAGCGGAGGAGGCTAGCAAAGACAAAGAAG	GTCAAGAGTGCAACCTTGTCCTCCACGGAGAGCACGGCGTCTGGAATGCAGTATGAGGTCAGAGCGGTTGGCGAGGAGCAAAGGTCAGAGGAGCCAAAGCGCAGGGTGGATACTTCAGTGTCTTGGGAGGCGTTGATTTGTGTCGGATCGTCCAAGAAGAGAGCGAGGAAGGCATCCTCTTCAGATGATGAAGGAGGGCCAAGAACACTGGGAGGGGATGGCCACAGAGCGGAGGAGGCTAGCAAAGACAAAGAAG	1	2 Base Changes	VKSATLSSTESTASGMQYEVRAVGEEQRSEEPKRRVDTSVSWEALICVGSSKKRARKASSSDDEGGPRTLGGDGHRAEEASKDKE	VKSATLSSTESTASGMQDEVRAVGEEQRSEEPKRRVDTSVSWEALICVGSSKKRARKASSSDDEGGPRTLGGDGHRAEEASKDKE
GTCAAGAGTGCAACCTTGTCCTCCACGGAGAGCACGGCGTCTGGAATTCAGGATGAGGTCAGAGCGGTTGGCGAGGAGCAAAGGTCAGAGGAGCCAAAGCGCAGGGTGGATACTTCTGTGTCTTGGGAGGCGTTGATTTGTGTCGGATCGTCCAAGAAGAGAGCGAGGAAGGCATCCTCTTCAGATGATGAAGGAGGGCCAAGAACACTGGGAGGGGATGGCCACAGAGCGGAGGAGGCTAGCAAAGACAAAGAAG	GTCAAGAGTGCAACCTTGTCCTCCACGGAGAGCACGGCGTCTGGAATTCAGGATGAGGTCAGAGCGGTTGGCGAGGAGCAAAGGTCAGAGGAGCCAAAGCGCAGGGTGGATACTTCTGTGTCTTGGGAGGCGTTGATTTGTGTCGGATCGTCCAAGAAGAGAGCGAGGAAGGCATCCTCTTCAGATGATGAAGGAGGGCCAAGAACACTGGGAGGGGATGGCCACAGAGCGGAGGAGGCTAGCAAAGACAAAGAAG	1	3 Base Changes	VKSATLSSTESTASGIQDEVRAVGEEQRSEEPKRRVDTSVSWEALICVGSSKKRARKASSSDDEGGPRTLGGDGHRAEEASKDKE	VKSATLSSTESTASGMQDEVRAVGEEQRSEEPKRRVDTSVSWEALICVGSSKKRARKASSSDDEGGPRTLGGDGHRAEEASKDKE
GTCAAGAGTGCAACCTTGTCCTCCACGGAGAGCACGGCGTGTGGAATGCAGGATGAGGTCAGAGCGGTTGGCGAGGAGCAAAGGTCAGAGGAGCCAAAGCGCAGGGTGGATACTTCAGTGTCTTGGGAGGCGTTGATTTGTGTCGTATCGTCCAAGAAGAGAGCGAGGAAGGCATCCTCTTCAGATGATGAAGGATGGCCAAGAACACTGGGAGGGGATGGCCACAGAGCGGAGGAGGCTAGCAAAGACGAAGAAG	GTCAAGAGTGCAACCTTGTCCTCCACGGAGAGCACGGCGTGTGGAATGCAGGATGAGGTCAGAGCGGTTGGCGAGGAGCAAAGGTCAGAGGAGCCAAAGCGCAGGGTGGATACTTCAGTGTCTTGGGAGGCGTTGATTTGTGTCGTATCGTCCAAGAAGAGAGCGAGGAAGGCATCCTCTTCAGATGATGAAGGATGGCCAAGAACACTGGGAGGGGATGGCCACAGAGCGGAGGAGGCTAGCAAAGACGAAGAAG	1	5 Base Changes	VKSATLSSTESTACGMQDEVRAVGEEQRSEEPKRRVDTSVSWEALICVVSSKKRARKASSSDDEGWPRTLGGDGHRAEEASKDEE	VKSATLSSTESTASGMQDEVRAVGEEQRSEEPKRRVDTSVSWEALICVGSSKKRARKASSSDDEGGPRTLGGDGHRAEEASKDKE
GTCAAGAGTGCAACCTTGTCCTCCACGGAGATCACGGCGTCTGGAATGCAGGATGAGGTCAGAGCGGTTGGCGAGGAGCAAAGGTCAGAGGAGCCAAAGCGCAGGGTGGATACTTCAGTGTCTTGGGAGGCGTTGATTTGTGTCTGATCGTCCAAGAAGAGAGCGAGGAAGGCATCCTCTTCAGATGATGAAGGAGGGCCAAGAACACTGGGAGGGGATGGCCACAGAGCGGAGGAGGCTAGCAAAGACAAAGAAG	GTCAAGAGTGCAACCTTGTCCTCCACGGAGATCACGGCGTCTGGAATGCAGGATGAGGTCAGAGCGGTTGGCGAGGAGCAAAGGTCAGAGGAGCCAAAGCGCAGGGTGGATACTTCAGTGTCTTGGGAGGCGTTGATTTGTGTCTGATCGTCCAAGAAGAGAGCGAGGAAGGCATCCTCTTCAGATGATGAAGGAGGGCCAAGAACACTGGGAGGGGATGGCCACAGAGCGGAGGAGGCTAGCAAAGACAAAGAAG	1	3 Base Changes	VKSATLSSTEITASGMQDEVRAVGEEQRSEEPKRRVDTSVSWEALICV*	VKSATLSSTESTASGMQDEVRAVGEEQRSEEPKRRVDTSVSWEALICVGSSKKRARKASSSDDEGGPRTLGGDGHRAEEASKDKE
GTCAAGAGTGCAACCTTTTCCTCCACGGAGAGCACGGCGTCTGCAATGCAGGATGGGGTCAGAGCGGTTGGCGAGGAGCAAAGGTCAGAGGAGCCAAAGCGCAGGGTGGATACTTCAGTGTCTTGTGAGGCGTTGATTTGTGTCGGATCGTCCTAGAAGAGAGCGAGGAAGGAATCCTATTCAGATGATGAAGGAGGGCCAAGAACACTGGGAGGGGATGGCCACAGAGCGGAGGAGGCTAGCAAAGACAAAGAAG	GTCAAGAGTGCAACCTTTTCCTCCACGGAGAGCACGGCGTCTGCAATGCAGGATGGGGTCAGAGCGGTTGGCGAGGAGCAAAGGTCAGAGGAGCCAAAGCGCAGGGTGGATACTTCAGTGTCTTGTGAGGCGTTGATTTGTGTCGGATCGTCCTAGAAGAGAGCGAGGAAGGAATCCTATTCAGATGATGAAGGAGGGCCAAGAACACTGGGAGGGGATGGCCACAGAGCGGAGGAGGCTAGCAAAGACAAAGAAG	1	8 Base Changes	VKSATFSSTESTASAMQDGVRAVGEEQRSEEPKRRVDTSVSCEALICVGSS*	VKSATLSSTESTASGMQDEVRAVGEEQRSEEPKRRVDTSVSWEALICVGSSKKRARKASSSDDEGGPRTLGGDGHRAEEASKDKE
GTCAAGAGTGCAACCTTTTCCTCCACGGAGAGCACGGCGTCTGGAATGCAGGATGAGGTCAGAGCGGTTGGCGAGGAGCAAAGGTCAGAGGAGCCAAAGCGCAGGGTGGATACTTCAGTGTCTTGGGAGGCGTTGATTTGTGTCGGATCGTCCAAGAAGAGAGCGAGGAAGGCATCCTCTTCAGATGATGAAGGAGGGCCAAGAACACTGGGAGGGGATGGCCACAGAGCGGAGGAGGCGAGCAAAGACAAAGAAG	GTCAAGAGTGCAACCTTTTCCTCCACGGAGAGCACGGCGTCTGGAATGCAGGATGAGGTCAGAGCGGTTGGCGAGGAGCAAAGGTCAGAGGAGCCAAAGCGCAGGGTGGATACTTCAGTGTCTTGGGAGGCGTTGATTTGTGTCGGATCGTCCAAGAAGAGAGCGAGGAAGGCATCCTCTTCAGATGATGAAGGAGGGCCAAGAACACTGGGAGGGGATGGCCACAGAGCGGAGGAGGCGAGCAAAGACAAAGAAG	1	3 Base Changes	VKSATFSSTESTASGMQDEVRAVGEEQRSEEPKRRVDTSVSWEALICVGSSKKRARKASSSDDEGGPRTLGGDGHRAEEASKDKE	VKSATLSSTESTASGMQDEVRAVGEEQRSEEPKRRVDTSVSWEALICVGSSKKRARKASSSDDEGGPRTLGGDGHRAEEASKDKE
GTCAAGAGTGCCAAATTGTCCTCCACGGAGAGCACGGCGTCTGGAATGCAGGATGAGGTCAGAGCGGTTGGCGAGGAGCAAAGGTCAGAGGAGCCAAAGAGCAGGGTGGATACTTCAGTGTCTTGTGAGGCGTTGATTTGTGTCTGATCGTCCAAGAAGAGTGCGGGGAAGGCATCCTCTTCAGATGATGAAGGAGGGCCAAGAACACTGGGAGGGGATGGCCACAGAGCGGAGGAGGCTAGCCAAGACAAAGAAG	GTCAAGAGTGCCAAATTGTCCTCCACGGAGAGCACGGCGTCTGGAATGCAGGATGAGGTCAGAGCGGTTGGCGAGGAGCAAAGGTCAGAGGAGCCAAAGAGCAGGGTGGATACTTCAGTGTCTTGTGAGGCGTTGATTTGTGTCTGATCGTCCAAGAAGAGTGCGGGGAAGGCATCCTCTTCAGATGATGAAGGAGGGCCAAGAACACTGGGAGGGGATGGCCACAGAGCGGAGGAGGCTAGCCAAGACAAAGAAG	1	8 Base Changes	VKSAKLSSTESTASGMQDEVRAVGEEQRSEEPKSRVDTSVSCEALICV*	VKSATLSSTESTASGMQDEVRAVGEEQRSEEPKRRVDTSVSWEALICVGSSKKRARKASSSDDEGGPRTLGGDGHRAEEASKDKE
GTCAAGAGTGCCAACTACTCCTCCACGGAGAGCACGGCGTCTGGAATGCAGGATGAGGTCAGAGCGGTTGGCGAGGAGCAAAGGTCAGAGGAGCCAAAGCGCAGGGTGGATACTTCAGTGTCTTGGGAGGCGTTGATTTGTGTCGGATCGTCCAAGGAGAGAGCGAGGAAGGCATCCTCTTCAGATGATGAAGGAGGGCCAAGAACACTGGGAGGGGATGGCCACAGAGCGGAGGAGGCTAGCAAAGACAAAGAAG	GTCAAGAGTGCCAACTACTCCTCCACGGAGAGCACGGCGTCTGGAATGCAGGATGAGGTCAGAGCGGTTGGCGAGGAGCAAAGGTCAGAGGAGCCAAAGCGCAGGGTGGATACTTCAGTGTCTTGGGAGGCGTTGATTTGTGTCGGATCGTCCAAGGAGAGAGCGAGGAAGGCATCCTCTTCAGATGATGAAGGAGGGCCAAGAACACTGGGAGGGGATGGCCACAGAGCGGAGGAGGCTAGCAAAGACAAAGAAG	1	4 Base Changes	VKSANYSSTESTASGMQDEVRAVGEEQRSEEPKRRVDTSVSWEALICVGSSKERARKASSSDDEGGPRTLGGDGHRAEEASKDKE	VKSATLSSTESTASGMQDEVRAVGEEQRSEEPKRRVDTSVSWEALICVGSSKKRARKASSSDDEGGPRTLGGDGHRAEEASKDKE
GTCAAGAGTGCCAACTAGTCCTCCACGGAGAGCACGGCGTCTGGAATGCAGGATGAGGTCAGAGCGGTTGGCGAGGAGCAAAGGTCAGAGGAGCCAAAGCGCAGGGTGGATACTTCAGTGTCTTGGGAGGCGTTGATTTGTGTCGGATCGTCCAAGAAGAGAGCGAGGAAGGCATCCTCTTCAGATGATGAAGGAGGGCCAAGAACACTGGGAGGGGATGGCCACAGAGCGGAGGAGGCTAGCAAAGACAAAGAAG	GTCAAGAGTGCCAACTAGTCCTCCACGGAGAGCACGGCGTCTGGAATGCAGGATGAGGTCAGAGCGGTTGGCGAGGAGCAAAGGTCAGAGGAGCCAAAGCGCAGGGTGGATACTTCAGTGTCTTGGGAGGCGTTGATTTGTGTCGGATCGTCCAAGAAGAGAGCGAGGAAGGCATCCTCTTCAGATGATGAAGGAGGGCCAAGAACACTGGGAGGGGATGGCCACAGAGCGGAGGAGGCTAGCAAAGACAAAGAAG	1	2 Base Changes	VKSAN*	VKSATLSSTESTASGMQDEVRAVGEEQRSEEPKRRVDTSVSWEALICVGSSKKRARKASSSDDEGGPRTLGGDGHRAEEASKDKE
GTCAAGAGTGCCAACTTGACCTCCACGGAGAGCACAGCGTCTGGAATGCAGGATGAGGTCAGAGCGGTGTGCGAGGAGCAAAGGTCAGAGGAGCCAAAGCGCAGGGTGGATACTTCAGTGTCTTGGGAGGCGTTGATTTGTGTCGGATCGTCCAAGAAGAGTGCGAGGAAGGCATCCTCTTCAGATGATGAAGGAGGGCCAGGAACACTGGGTGGGGATGGCCACAGAGCGGAGGAGGCTAGCAAAGACAAAGAAG	GTCAAGAGTGCCAACTTGACCTCCACGGAGAGCACAGCGTCTGGAATGCAGGATGAGGTCAGAGCGGTGTGCGAGGAGCAAAGGTCAGAGGAGCCAAAGCGCAGGGTGGATACTTCAGTGTCTTGGGAGGCGTTGATTTGTGTCGGATCGTCCAAGAAGAGTGCGAGGAAGGCATCCTCTTCAGATGATGAAGGAGGGCCAGGAACACTGGGTGGGGATGGCCACAGAGCGGAGGAGGCTAGCAAAGACAAAGAAG	1	8 Base Changes	VKSANLTSTESTASGMQDEVRAVCEEQRSEEPKRRVDTSVSWEALICVGSSKKSARKASSSDDEGGPGTLGGDGHRAEEASKDKE	VKSATLSSTESTASGMQDEVRAVGEEQRSEEPKRRVDTSVSWEALICVGSSKKRARKASSSDDEGGPRTLGGDGHRAEEASKDKE
GTCAAGAGTGCCAACTTGACCTCCACGGAGAGCACGGCGTCTGGAATGCAGGATGTGGTCAGAGCGGTTGGCGAGGAGCAAAGGTCAGAGGAGCCAAAGCGAAGGGTGGATACTTCAGTGTCTTGGGAGGCGTTGATTTGTGTCGGATCGTCCGAGAAGAGAGCGAGGACGGCATCCTCTTCACATGATGAAGGAGGGCCAAGACCACTGGGAGGGGATGGCCACAGAGCGGAGGAGGCTAGCAAAGACAAAGAAG	GTCAAGAGTGCCAACTTGACCTCCACGGAGAGCACGGCGTCTGGAATGCAGGATGTGGTCAGAGCGGTTGGCGAGGAGCAAAGGTCAGAGGAGCCAAAGCGAAGGGTGGATACTTCAGTGTCTTGGGAGGCGTTGATTTGTGTCGGATCGTCCGAGAAGAGAGCGAGGACGGCATCCTCTTCACATGATGAAGGAGGGCCAAGACCACTGGGAGGGGATGGCCACAGAGCGGAGGAGGCTAGCAAAGACAAAGAAG	1	8 Base Changes	VKSANLTSTESTASGMQDVVRAVGEEQRSEEPKRRVDTSVSWEALICVGSSEKRARTASSSHDEGGPRPLGGDGHRAEEASKDKE	VKSATLSSTESTASGMQDEVRAVGEEQRSEEPKRRVDTSVSWEALICVGSSKKRARKASSSDDEGGPRTLGGDGHRAEEASKDKE
GTCAAGAGTGCCAACTTGCCCTCCACGGAGAGCACGGCGTCTTGAATGCAGGATGAGGTCAGAGCGGTTGGCGAGGAGCAAAGGTCAGAGGAGCCAAAGCGCAGGGTGGATACTTCAGTGTCTTGGGAGGCGTTGATTTGTGTCGGATCGTCCAAGAAGAGAGCGAGGAAGGCATCCTCTTCAGATGATGAAGGAGGGCCAAGAACACTGGGAGGGGATGGCCACAGAGCGGAGGAGGCTAGCAAAGACAAAGAAG	GTCAAGAGTGCCAACTTGCCCTCCACGGAGAGCACGGCGTCTTGAATGCAGGATGAGGTCAGAGCGGTTGGCGAGGAGCAAAGGTCAGAGGAGCCAAAGCGCAGGGTGGATACTTCAGTGTCTTGGGAGGCGTTGATTTGTGTCGGATCGTCCAAGAAGAGAGCGAGGAAGGCATCCTCTTCAGATGATGAAGGAGGGCCAAGAACACTGGGAGGGGATGGCCACAGAGCGGAGGAGGCTAGCAAAGACAAAGAAG	1	3 Base Changes	VKSANLPSTESTAS*	VKSATLSSTESTASGMQDEVRAVGEEQRSEEPKRRVDTSVSWEALICVGSSKKRARKASSSDDEGGPRTLGGDGHRAEEASKDKE
GTCAAGAGTGCCAACTTGTCCTCAACGGAGAGCACGGCGTCTGGAATGCAGGATGAGGTCAGAGCGGTTGGCGAGGAGCAAAGGTCAGAGGAGCCAAAGCGCAGGGTGGATACTTCAGTGTCTTGGGAGGCGTTGATTTGTGTCGGATCGTCCAAGAAGAGAGCGAGGAAGGCATCCTCTTCAGATGATGAAGGAGGGCCAAGAACACTGGGAGGGGATGGCCACAGAGCGGAGGAGGCTAGCAAAGACAAAGAAG	GTCAAGAGTGCCAACTTGTCCTCAACGGAGAGCACGGCGTCTGGAATGCAGGATGAGGTCAGAGCGGTTGGCGAGGAGCAAAGGTCAGAGGAGCCAAAGCGCAGGGTGGATACTTCAGTGTCTTGGGAGGCGTTGATTTGTGTCGGATCGTCCAAGAAGAGAGCGAGGAAGGCATCCTCTTCAGATGATGAAGGAGGGCCAAGAACACTGGGAGGGGATGGCCACAGAGCGGAGGAGGCTAGCAAAGACAAAGAAG	1	2 Base Changes	VKSANLSSTESTASGMQDEVRAVGEEQRSEEPKRRVDTSVSWEALICVGSSKKRARKASSSDDEGGPRTLGGDGHRAEEASKDKE	VKSATLSSTESTASGMQDEVRAVGEEQRSEEPKRRVDTSVSWEALICVGSSKKRARKASSSDDEGGPRTLGGDGHRAEEASKDKE
GTCAAGAGTGCCAACTTGTCCTCAACGGAGAGCACGGCGTCTGGAATGCAGGATGAGGTCAGAGCGGTTGGCGAGGAGCAAAGGTCAGAGGAGCCAAAGCGCAGGGTGGATACTTCAGTGTCTTGGGAGGCGTTGATTTGTGTCGGATCGTCCAAGAAGAGAGCGAGGAAGGCATCCTCTTCAGATGATGAAGGAGGGCTAAGAACACTGGGAGGGGATGGCCACAGAGCGGAGGAGGCTAGCAAAGACAAAGAAG	GTCAAGAGTGCCAACTTGTCCTCAACGGAGAGCACGGCGTCTGGAATGCAGGATGAGGTCAGAGCGGTTGGCGAGGAGCAAAGGTCAGAGGAGCCAAAGCGCAGGGTGGATACTTCAGTGTCTTGGGAGGCGTTGATTTGTGTCGGATCGTCCAAGAAGAGAGCGAGGAAGGCATCCTCTTCAGATGATGAAGGAGGGCTAAGAACACTGGGAGGGGATGGCCACAGAGCGGAGGAGGCTAGCAAAGACAAAGAAG	1	3 Base Changes	VKSANLSSTESTASGMQDEVRAVGEEQRSEEPKRRVDTSVSWEALICVGSSKKRARKASSSDDEGGLRTLGGDGHRAEEASKDKE	VKSATLSSTESTASGMQDEVRAVGEEQRSEEPKRRVDTSVSWEALICVGSSKKRARKASSSDDEGGPRTLGGDGHRAEEASKDKE
GTCAAGAGTGCCAACTTGTCCTCCACCGAGAGCACGGCGTCTGGAATGCAGGATGAGGTCAGAGCGGTTGGCGAGGAGCAAAGGTCAGAGGGGCCAAAGCGCAGGGTGGATACTTCAGTGTCTTGGGAGGCGTTGATTTGTGTCGGATCGTCCAAGAAGAGAGCGAGGAAGGCATCCTCTTCAGATGATGAAGGAGGGCCAAGAACACTGGGAGGGGATGGCCACAGAGCGGAGGAGTCTAGCAAAGACAAAGAAG	GTCAAGAGTGCCAACTTGTCCTCCACCGAGAGCACGGCGTCTGGAATGCAGGATGAGGTCAGAGCGGTTGGCGAGGAGCAAAGGTCAGAGGGGCCAAAGCGCAGGGTGGATACTTCAGTGTCTTGGGAGGCGTTGATTTGTGTCGGATCGTCCAAGAAGAGAGCGAGGAAGGCATCCTCTTCAGATGATGAAGGAGGGCCAAGAACACTGGGAGGGGATGGCCACAGAGCGGAGGAGTCTAGCAAAGACAAAGAAG	1	4 Base Changes	VKSANLSSTESTASGMQDEVRAVGEEQRSEGPKRRVDTSVSWEALICVGSSKKRARKASSSDDEGGPRTLGGDGHRAEESSKDKE	VKSATLSSTESTASGMQDEVRAVGEEQRSEEPKRRVDTSVSWEALICVGSSKKRARKASSSDDEGGPRTLGGDGHRAEEASKDKE
GTCAAGAGTGCCAACTTGTCCTCCACGGAGAGCACGGAGTCTGGAATGCAGGATGAGGTCAGAGCGGTTGGCGAGGAGCAAAGGTCAGAGGAGCCAAAGCGCAGGGTGTATACTTCAGTGTCTTGGGAGGCGTTGATTTGTGTCGGATCGTCCAAGAAGAGAGCGAGGAAGGCATCCTCTTCAGATGATGAAGGAGGGCCAAGAACTCTGGGAGGGGATGGCCACAGAGCGGAGGAGGCTAGCAAATACAAAGAAG	GTCAAGAGTGCCAACTTGTCCTCCACGGAGAGCACGGAGTCTGGAATGCAGGATGAGGTCAGAGCGGTTGGCGAGGAGCAAAGGTCAGAGGAGCCAAAGCGCAGGGTGTATACTTCAGTGTCTTGGGAGGCGTTGATTTGTGTCGGATCGTCCAAGAAGAGAGCGAGGAAGGCATCCTCTTCAGATGATGAAGGAGGGCCAAGAACTCTGGGAGGGGATGGCCACAGAGCGGAGGAGGCTAGCAAATACAAAGAAG	1	5 Base Changes	VKSANLSSTESTESGMQDEVRAVGEEQRSEEPKRRVYTSVSWEALICVGSSKKRARKASSSDDEGGPRTLGGDGHRAEEASKYKE	VKSATLSSTESTASGMQDEVRAVGEEQRSEEPKRRVDTSVSWEALICVGSSKKRARKASSSDDEGGPRTLGGDGHRAEEASKDKE
GTCAAGAGTGCCAACTTGTCCTCCACGGAGAGCACGGCGTCTGGAATGCAGGATGAGGTCAGAGCGGTTGGAGAGGAGCAAAGGTCAGAGGAGCCAAAGCGCAGGGTGGATACTTCAGTGTCTTGGGAGGCGTTGATTTGTGTCGGATCGTCCAAGAAGAGAGAGAGGAAGGCATCCTCTTCAGATGATGAAGGAGGGCCAAGAACACTGGGAGGGGATGGCCACAGAGCGGAGGAGGCTAGCAAAGACAAAGAAG	GTCAAGAGTGCCAACTTGTCCTCCACGGAGAGCACGGCGTCTGGAATGCAGGATGAGGTCAGAGCGGTTGGAGAGGAGCAAAGGTCAGAGGAGCCAAAGCGCAGGGTGGATACTTCAGTGTCTTGGGAGGCGTTGATTTGTGTCGGATCGTCCAAGAAGAGAGAGAGGAAGGCATCCTCTTCAGATGATGAAGGAGGGCCAAGAACACTGGGAGGGGATGGCCACAGAGCGGAGGAGGCTAGCAAAGACAAAGAAG	1	3 Base Changes	VKSANLSSTESTASGMQDEVRAVGEEQRSEEPKRRVDTSVSWEALICVGSSKKRERKASSSDDEGGPRTLGGDGHRAEEASKDKE	VKSATLSSTESTASGMQDEVRAVGEEQRSEEPKRRVDTSVSWEALICVGSSKKRARKASSSDDEGGPRTLGGDGHRAEEASKDKE
GTCAAGAGTGCCAACTTGTCCTCCACGGAGAGCACGGCGTCTGGAATGCAGGATGAGGTCAGAGCGGTTGGCGAGGAGCAAAGGTCAGAGGAGCCAAAGCGCAGGGTGGATACTTCAGTGTCTTGGGAGGAGTTGATTTGTGTCGGATCGTCCAAGAAGAGAGCGAGGAAGGCATCCTCTTCAGATGATGAAGGAGGGCCAAGAACACTGGGAGGGGATGGCCACAGAGCGGAGGAGGCTAGCAAAGACAAAGAAG	GTCAAGAGTGCCAACTTGTCCTCCACGGAGAGCACGGCGTCTGGAATGCAGGATGAGGTCAGAGCGGTTGGCGAGGAGCAAAGGTCAGAGGAGCCAAAGCGCAGGGTGGATACTTCAGTGTCTTGGGAGGAGTTGATTTGTGTCGGATCGTCCAAGAAGAGAGCGAGGAAGGCATCCTCTTCAGATGATGAAGGAGGGCCAAGAACACTGGGAGGGGATGGCCACAGAGCGGAGGAGGCTAGCAAAGACAAAGAAG	1	2 Base Changes	VKSANLSSTESTASGMQDEVRAVGEEQRSEEPKRRVDTSVSWEELICVGSSKKRARKASSSDDEGGPRTLGGDGHRAEEASKDKE	VKSATLSSTESTASGMQDEVRAVGEEQRSEEPKRRVDTSVSWEALICVGSSKKRARKASSSDDEGGPRTLGGDGHRAEEASKDKE
GTCAAGAGTGCCAACTTGTCCTCCACGGAGAGCACGGCGTCTGGAATGCAGGATGAGGTCAGAGCGGTTGGCGAGGAGCAAAGGTCAGAGGAGCCAAAGCGCAGGGTGGATACTTCAGTGTCTTGGGAGGCGTTGATTTGTGTCGGATCGTCCAAGAAGAGAGCGAGGAAGGCATCCTCTTCAGATGATGAAGGAGGGCCAAGAACACTGGGAGGGGATGGCCACAGAGCGGAGGAGGCTAGCAAATACAAAGAAG	GTCAAGAGTGCCAACTTGTCCTCCACGGAGAGCACGGCGTCTGGAATGCAGGATGAGGTCAGAGCGGTTGGCGAGGAGCAAAGGTCAGAGGAGCCAAAGCGCAGGGTGGATACTTCAGTGTCTTGGGAGGCGTTGATTTGTGTCGGATCGTCCAAGAAGAGAGCGAGGAAGGCATCCTCTTCAGATGATGAAGGAGGGCCAAGAACACTGGGAGGGGATGGCCACAGAGCGGAGGAGGCTAGCAAATACAAAGAAG	1	2 Base Changes	VKSANLSSTESTASGMQDEVRAVGEEQRSEEPKRRVDTSVSWEALICVGSSKKRARKASSSDDEGGPRTLGGDGHRAEEASKYKE	VKSATLSSTESTASGMQDEVRAVGEEQRSEEPKRRVDTSVSWEALICVGSSKKRARKASSSDDEGGPRTLGGDGHRAEEASKDKE
GTCAAGAGTGCCAACTTGTCCTCCACGGAGAGCACGGCGTCTGGAATGCAGGATGAGGTCAGAGCGGTTGGCGAGGAGCAAAGGTCAGAGGAGCCAAAGCGCAGGGTGGATACTTCAGTGTCTTGGGAGGCGTTGATTTGTGTCGGATCGTCCAAGAAGAGAGCGAGGAAGGCATCCTCTTCAGATGATGAATGAGGGCCAAGAACACTGGGAGGGGATGGCCACAGAGCGGAGGAGGCTAGCAAAGACAAAGAAG	GTCAAGAGTGCCAACTTGTCCTCCACGGAGAGCACGGCGTCTGGAATGCAGGATGAGGTCAGAGCGGTTGGCGAGGAGCAAAGGTCAGAGGAGCCAAAGCGCAGGGTGGATACTTCAGTGTCTTGGGAGGCGTTGATTTGTGTCGGATCGTCCAAGAAGAGAGCGAGGAAGGCATCCTCTTCAGATGATGAATGAGGGCCAAGAACACTGGGAGGGGATGGCCACAGAGCGGAGGAGGCTAGCAAAGACAAAGAAG	1	2 Base Changes	VKSANLSSTESTASGMQDEVRAVGEEQRSEEPKRRVDTSVSWEALICVGSSKKRARKASSSDDE*	VKSATLSSTESTASGMQDEVRAVGEEQRSEEPKRRVDTSVSWEALICVGSSKKRARKASSSDDEGGPRTLGGDGHRAEEASKDKE
GTCAAGAGTGCCAACTTGTCCTCCACGGAGAGCACGGCGTCTGGAATGCAGGATGAGGTCAGAGCGGTTGGCGAGGAGCAGAGGTCAGAGGAGCCAAAGCGCAGGGTGGATACTTCAGTGTCTTGGGAGGCGTTGATTTGTGTCGGATCGTCCAAGAAGAGAGCGAGGAAGGCATCCTCTTCAGATGATGAAGGAGGGCCACGAACACTGGGAGGGGATGGCCACAGAGCGGAGGAGGCTAGCAAAGACAAAGAAG	GTCAAGAGTGCCAACTTGTCCTCCACGGAGAGCACGGCGTCTGGAATGCAGGATGAGGTCAGAGCGGTTGGCGAGGAGCAGAGGTCAGAGGAGCCAAAGCGCAGGGTGGATACTTCAGTGTCTTGGGAGGCGTTGATTTGTGTCGGATCGTCCAAGAAGAGAGCGAGGAAGGCATCCTCTTCAGATGATGAAGGAGGGCCACGAACACTGGGAGGGGATGGCCACAGAGCGGAGGAGGCTAGCAAAGACAAAGAAG	1	3 Base Changes	VKSANLSSTESTASGMQDEVRAVGEEQRSEEPKRRVDTSVSWEALICVGSSKKRARKASSSDDEGGPRTLGGDGHRAEEASKDKE	VKSATLSSTESTASGMQDEVRAVGEEQRSEEPKRRVDTSVSWEALICVGSSKKRARKASSSDDEGGPRTLGGDGHRAEEASKDKE
GTCAAGAGTGCCAACTTGTCCTCCACGGAGAGCACGGCGTCTGGAATGCAGGATGAGGTCAGAGCGGTTGGCGAGGGGCAAAGGTCAGAGGAGCCAAAGCGCAGGGTGGATACTTCAGTGTCTTGGGAGGCGTTGATTTGTGTCGGATCGTCCAAGAAGAGAGCGAGGAAGGCATCCTCTTCAGATGATGAAGGAGGGCCAAGAACACTGGGAGGGGATGGCCACAGAGCGGAGGAGGCTAGCAAAGACAAAGAAG	GTCAAGAGTGCCAACTTGTCCTCCACGGAGAGCACGGCGTCTGGAATGCAGGATGAGGTCAGAGCGGTTGGCGAGGGGCAAAGGTCAGAGGAGCCAAAGCGCAGGGTGGATACTTCAGTGTCTTGGGAGGCGTTGATTTGTGTCGGATCGTCCAAGAAGAGAGCGAGGAAGGCATCCTCTTCAGATGATGAAGGAGGGCCAAGAACACTGGGAGGGGATGGCCACAGAGCGGAGGAGGCTAGCAAAGACAAAGAAG	1	2 Base Changes	VKSANLSSTESTASGMQDEVRAVGEGQRSEEPKRRVDTSVSWEALICVGSSKKRARKASSSDDEGGPRTLGGDGHRAEEASKDKE	VKSATLSSTESTASGMQDEVRAVGEEQRSEEPKRRVDTSVSWEALICVGSSKKRARKASSSDDEGGPRTLGGDGHRAEEASKDKE
GTCAAGAGTGCCAACTTGTCCTCCACGGAGAGCACGGCGTCTGGAATGCAGGATGAGGTCAGAGCGGTTGGCGATGAGCAAAGGTCAGAGGAGCCAAAGCGCAGGGTGGATACTTCAGTGTCTTGGGAGGCGTTGATTTGTGTCGGATCGTCCAAGAAGAGAGCGAGGAAGGCATCCTCTTCAGATGATGAAGGAGGGCCAAGAACACTGGGAGGGGATGGACACAGAGCGGAGGAGGCTAGCAAAGACAAAGAAG	GTCAAGAGTGCCAACTTGTCCTCCACGGAGAGCACGGCGTCTGGAATGCAGGATGAGGTCAGAGCGGTTGGCGATGAGCAAAGGTCAGAGGAGCCAAAGCGCAGGGTGGATACTTCAGTGTCTTGGGAGGCGTTGATTTGTGTCGGATCGTCCAAGAAGAGAGCGAGGAAGGCATCCTCTTCAGATGATGAAGGAGGGCCAAGAACACTGGGAGGGGATGGACACAGAGCGGAGGAGGCTAGCAAAGACAAAGAAG	1	3 Base Changes	VKSANLSSTESTASGMQDEVRAVGDEQRSEEPKRRVDTSVSWEALICVGSSKKRARKASSSDDEGGPRTLGGDGHRAEEASKDKE	VKSATLSSTESTASGMQDEVRAVGEEQRSEEPKRRVDTSVSWEALICVGSSKKRARKASSSDDEGGPRTLGGDGHRAEEASKDKE
GTCAAGAGTGCCAACTTGTCCTCCACGGAGAGCACGGCGTCTGGACTGCTGGATGAGGTCAGAGCGGTTGGCGAGGAGCACAGGTCAGAGGAGCCAAAGCGCAGGGTGGATACTTCAGTGTCTTGGGAGGCGTTGATTTGTGTCGGATCGTCCAAGAAGAGAGCGAGGAAGGCATCCTCTTCAGATGATGAAGGAGGGCCAAGAACACTGGGAGGGGATGGCCACAGAGCGGAGGAGGCTAGCAAAGACAAAGAAG	GTCAAGAGTGCCAACTTGTCCTCCACGGAGAGCACGGCGTCTGGACTGCTGGATGAGGTCAGAGCGGTTGGCGAGGAGCACAGGTCAGAGGAGCCAAAGCGCAGGGTGGATACTTCAGTGTCTTGGGAGGCGTTGATTTGTGTCGGATCGTCCAAGAAGAGAGCGAGGAAGGCATCCTCTTCAGATGATGAAGGAGGGCCAAGAACACTGGGAGGGGATGGCCACAGAGCGGAGGAGGCTAGCAAAGACAAAGAAG	1	4 Base Changes	VKSANLSSTESTASGLLDEVRAVGEEHRSEEPKRRVDTSVSWEALICVGSSKKRARKASSSDDEGGPRTLGGDGHRAEEASKDKE	VKSATLSSTESTASGMQDEVRAVGEEQRSEEPKRRVDTSVSWEALICVGSSKKRARKASSSDDEGGPRTLGGDGHRAEEASKDKE
GTCAAGAGTGCCAACTTGTCCTCCACGGAGATCACGGCTTCTGGAATGCAGGATGAGGTCAGAGCGGTTGGAGAGGAGCAAAGGTCAGAGGAGCCAAAGCGCAGGATGGATACTTCAGTGTCTTGGGAGGCGTTGATTTGTGTCGGATCGACCAAGAATAGAGCGAGGAAGGCATGCTCTTCATATGATGAAGGAGGGCCAAGAACACTGGGAGGGGATGGCCACAGTGCGGAGGAGGCTAGCAAAGACAAAGAAG	GTCAAGAGTGCCAACTTGTCCTCCACGGAGATCACGGCTTCTGGAATGCAGGATGAGGTCAGAGCGGTTGGAGAGGAGCAAAGGTCAGAGGAGCCAAAGCGCAGGATGGATACTTCAGTGTCTTGGGAGGCGTTGATTTGTGTCGGATCGACCAAGAATAGAGCGAGGAAGGCATGCTCTTCATATGATGAAGGAGGGCCAAGAACACTGGGAGGGGATGGCCACAGTGCGGAGGAGGCTAGCAAAGACAAAGAAG	1	10 Base Changes	VKSANLSSTEITASGMQDEVRAVGEEQRSEEPKRRMDTSVSWEALICVGSTKNRARKACSSYDEGGPRTLGGDGHSAEEASKDKE	VKSATLSSTESTASGMQDEVRAVGEEQRSEEPKRRVDTSVSWEALICVGSSKKRARKASSSDDEGGPRTLGGDGHRAEEASKDKE
GTCAAGAGTGCCAACTTGTCCTCCACGGAGGGCACGGCGTCTGGAATGCAGGATGAGGTCAGAGCGGTTGGCGAGTAGCAAAGGTCAGAGGAGCCAAAGCGCAGGGTGGATACTTCAGTGTCTTGGGAGGCGTTGATTTGTGTCGGATCGTCCAAGAAGAGAGCGAGGAAGGCATCCTCTTCAGATGATGAAGGAGGGCCAAGAACACTGGGAGGGGATGGCCACAGAGCGGAGGAGGCTAGCAAAGACAAAGAAG	GTCAAGAGTGCCAACTTGTCCTCCACGGAGGGCACGGCGTCTGGAATGCAGGATGAGGTCAGAGCGGTTGGCGAGTAGCAAAGGTCAGAGGAGCCAAAGCGCAGGGTGGATACTTCAGTGTCTTGGGAGGCGTTGATTTGTGTCGGATCGTCCAAGAAGAGAGCGAGGAAGGCATCCTCTTCAGATGATGAAGGAGGGCCAAGAACACTGGGAGGGGATGGCCACAGAGCGGAGGAGGCTAGCAAAGACAAAGAAG	1	3 Base Changes	VKSANLSSTEGTASGMQDEVRAVGE*	VKSATLSSTESTASGMQDEVRAVGEEQRSEEPKRRVDTSVSWEALICVGSSKKRARKASSSDDEGGPRTLGGDGHRAEEASKDKE
GTCAAGAGTGCCAACTTGTCCTCCAGGGAGAGCACGGCGTCTTGAATGCAGGATGAGGTCAGAGCGGTTGGCGAGGATCAAAGGTCAGAGGAGCCAAAGCGCAGGGTGGATACTTCAGTGTCTTGGGAGGCGTTGATTTGTGTCGGATCGTCCAAGAAGAGAGCGAGGAAGGCATCCTCTTCAGATGATGAAGGAGGGCCAAGAACACTGGGAGGGGATGGCCACAGAGCGGAGGAGGCTAGCAAAGACAAAGAAG	GTCAAGAGTGCCAACTTGTCCTCCAGGGAGAGCACGGCGTCTTGAATGCAGGATGAGGTCAGAGCGGTTGGCGAGGATCAAAGGTCAGAGGAGCCAAAGCGCAGGGTGGATACTTCAGTGTCTTGGGAGGCGTTGATTTGTGTCGGATCGTCCAAGAAGAGAGCGAGGAAGGCATCCTCTTCAGATGATGAAGGAGGGCCAAGAACACTGGGAGGGGATGGCCACAGAGCGGAGGAGGCTAGCAAAGACAAAGAAG	1	4 Base Changes	VKSANLSSRESTAS*	VKSATLSSTESTASGMQDEVRAVGEEQRSEEPKRRVDTSVSWEALICVGSSKKRARKASSSDDEGGPRTLGGDGHRAEEASKDKE
GTCAAGAGTGCCAACTTTTCCTCCACGGAGAGCACGGCGTCTGGAATGCAGGATGAGGTCAGAGCTGTTGGCGAGGAGCAAAGGTCAGAGGAGCCAAAGCGCAGGGTGGATACTTCAGTGTCTTGGGAGGCGTTGATTTGTGTAGGATCGTCCAAGAAGAGAGCGAGGAAGGCATCCTCTTCAGATGATGAATGAGGGACAAGAACACTAGGAGGGGATGGCCACAGAGCGGAGGAGGCTAGCAAAGACAAAGAAG	GTCAAGAGTGCCAACTTTTCCTCCACGGAGAGCACGGCGTCTGGAATGCAGGATGAGGTCAGAGCTGTTGGCGAGGAGCAAAGGTCAGAGGAGCCAAAGCGCAGGGTGGATACTTCAGTGTCTTGGGAGGCGTTGATTTGTGTAGGATCGTCCAAGAAGAGAGCGAGGAAGGCATCCTCTTCAGATGATGAATGAGGGACAAGAACACTAGGAGGGGATGGCCACAGAGCGGAGGAGGCTAGCAAAGACAAAGAAG	1	7 Base Changes	VKSANFSSTESTASGMQDEVRAVGEEQRSEEPKRRVDTSVSWEALICVGSSKKRARKASSSDDE*	VKSATLSSTESTASGMQDEVRAVGEEQRSEEPKRRVDTSVSWEALICVGSSKKRARKASSSDDEGGPRTLGGDGHRAEEASKDKE
GTCAAGAGTGCCACAATGTCCTCCACGGAGAGCACGGCGTCTGGAATGCAGGATGAGGTCAGAGCGGTTGGCGAGGAGCAAAGGTCAGAGGAGCCAAAGCGCAGGGTGGAAACTTCAGTGTCTTGGGAGGCGTTGATTTGTGTCGGATCGTCCAAGAAGAGAGCGAGGAAGGCATCATCTTCAGATGATGAAGGAGGGCCAAGAACACTGGGAGGGGATGGCCACAGAGCGGAGGAGGCTAGCAAAGACAAAGAAG	GTCAAGAGTGCCACAATGTCCTCCACGGAGAGCACGGCGTCTGGAATGCAGGATGAGGTCAGAGCGGTTGGCGAGGAGCAAAGGTCAGAGGAGCCAAAGCGCAGGGTGGAAACTTCAGTGTCTTGGGAGGCGTTGATTTGTGTCGGATCGTCCAAGAAGAGAGCGAGGAAGGCATCATCTTCAGATGATGAAGGAGGGCCAAGAACACTGGGAGGGGATGGCCACAGAGCGGAGGAGGCTAGCAAAGACAAAGAAG	1	4 Base Changes	VKSATMSSTESTASGMQDEVRAVGEEQRSEEPKRRVETSVSWEALICVGSSKKRARKASSSDDEGGPRTLGGDGHRAEEASKDKE	VKSATLSSTESTASGMQDEVRAVGEEQRSEEPKRRVDTSVSWEALICVGSSKKRARKASSSDDEGGPRTLGGDGHRAEEASKDKE
GTCAAGAGTGCCACAGTGTCCTCCACGGAGAGCACGGCGTCTGGAATGCAGGATGAGGTCAGAGCGGTTTGAGAGTAGCAAAGGTCAGAGGAGCCAAAGCGCAGGGTGGATACTTCAGTGTCTTGGGAGGAGTTGATTTGTGTCGGATCGTCAAAGAGGAGAGCGAGGAAGGCATCCTCCTCAGATGATGAAGGAGGGCCAAGAACACTGGGAGGGGATGGACACAGAGCGGAGGAGGCTAGCAAAGACAAAGAAG	GTCAAGAGTGCCACAGTGTCCTCCACGGAGAGCACGGCGTCTGGAATGCAGGATGAGGTCAGAGCGGTTTGAGAGTAGCAAAGGTCAGAGGAGCCAAAGCGCAGGGTGGATACTTCAGTGTCTTGGGAGGAGTTGATTTGTGTCGGATCGTCAAAGAGGAGAGCGAGGAAGGCATCCTCCTCAGATGATGAAGGAGGGCCAAGAACACTGGGAGGGGATGGACACAGAGCGGAGGAGGCTAGCAAAGACAAAGAAG	1	10 Base Changes	VKSATVSSTESTASGMQDEVRAV*	VKSATLSSTESTASGMQDEVRAVGEEQRSEEPKRRVDTSVSWEALICVGSSKKRARKASSSDDEGGPRTLGGDGHRAEEASKDKE
GTCAAGAGTGCCACATAGTCCTCCACGGAGAGCACGGCGTCTGGAATGCAGGATGAGGTCAGAGCGGTTGGCGAGGAGCAAAGGTCAGAGGAGCCAAAGCGCAGGGTGGATACTTCAGTGTCTTGGGAGGCGTTGATTTGTGTCGGATCGTACAAGAAGAGAGCGAGGAAGGCATCCTCTTCAGATGATGAATGAGGGCCAAGAACACTGGGAGGGGATGGCCACAGAGCGGAGGAGGCTAGCAAAGACAAAGAAG	GTCAAGAGTGCCACATAGTCCTCCACGGAGAGCACGGCGTCTGGAATGCAGGATGAGGTCAGAGCGGTTGGCGAGGAGCAAAGGTCAGAGGAGCCAAAGCGCAGGGTGGATACTTCAGTGTCTTGGGAGGCGTTGATTTGTGTCGGATCGTACAAGAAGAGAGCGAGGAAGGCATCCTCTTCAGATGATGAATGAGGGCCAAGAACACTGGGAGGGGATGGCCACAGAGCGGAGGAGGCTAGCAAAGACAAAGAAG	1	4 Base Changes	VKSAT*	VKSATLSSTESTASGMQDEVRAVGEEQRSEEPKRRVDTSVSWEALICVGSSKKRARKASSSDDEGGPRTLGGDGHRAEEASKDKE
GTCAAGAGTGCCACATAGTCCTCCACGGAGAGCACGGCGTCTGGAATGCAGGATGAGGTCAGAGCGGTTGGCGAGGAGCAAAGGTCAGAGGAGCCAAAGCGCAGGGTGGATACTTCAGTGTCTTGGGAGGCGTTGATTTGTGTCGGATCGTCCAAGAAGAGAGCGAGGAAGGCATCCTCTTCAGATGATGAAGGAGGGCCAAGAACACTGGGAGGGGATGGCCACAGAGCGGAGGAGGCTAGCAAAGACAAAGAAG	GTCAAGAGTGCCACATAGTCCTCCACGGAGAGCACGGCGTCTGGAATGCAGGATGAGGTCAGAGCGGTTGGCGAGGAGCAAAGGTCAGAGGAGCCAAAGCGCAGGGTGGATACTTCAGTGTCTTGGGAGGCGTTGATTTGTGTCGGATCGTCCAAGAAGAGAGCGAGGAAGGCATCCTCTTCAGATGATGAAGGAGGGCCAAGAACACTGGGAGGGGATGGCCACAGAGCGGAGGAGGCTAGCAAAGACAAAGAAG	1	2 Base Changes	VKSAT*	VKSATLSSTESTASGMQDEVRAVGEEQRSEEPKRRVDTSVSWEALICVGSSKKRARKASSSDDEGGPRTLGGDGHRAEEASKDKE
GTCAAGAGTGCCACATTCTCATCCACGGAGAGCACGGCGTCTGGAATGCAGGATGAGGTCAGAGCGGTTGGCGAGGAGCAAAGGTCAGAGGAGCCAAAGCGCAGGGTGGATACTTCAGTGTCTTGGGAGGCGTTGATTTGTGTAGGATCGACAAAGAAGAGAGCGAGGAAGGCATCCTCTTCAGATGATGAAGGAGGGCCAAGAACACTGGGAGGGGATGGCCACAGAGCGGAGGAGGCTAGCAAAGACAAAGAAG	GTCAAGAGTGCCACATTCTCATCCACGGAGAGCACGGCGTCTGGAATGCAGGATGAGGTCAGAGCGGTTGGCGAGGAGCAAAGGTCAGAGGAGCCAAAGCGCAGGGTGGATACTTCAGTGTCTTGGGAGGCGTTGATTTGTGTAGGATCGACAAAGAAGAGAGCGAGGAAGGCATCCTCTTCAGATGATGAAGGAGGGCCAAGAACACTGGGAGGGGATGGCCACAGAGCGGAGGAGGCTAGCAAAGACAAAGAAG	1	6 Base Changes	VKSATFSSTESTASGMQDEVRAVGEEQRSEEPKRRVDTSVSWEALICVGSTKKRARKASSSDDEGGPRTLGGDGHRAEEASKDKE	VKSATLSSTESTASGMQDEVRAVGEEQRSEEPKRRVDTSVSWEALICVGSSKKRARKASSSDDEGGPRTLGGDGHRAEEASKDKE
GTCAAGAGTGCCACATTCTCATCCACGGAGATCACGGCGTCTGGAATGCAGGATGAGGTCAGAGCGGTTGGCGAGGAGCAAATGTCAGAGGAGCCAAAGCGCAGGGTGGATACTTCAGTGTCTTGGGAGGCGTTGATTTGTGTCGGATCGTCCAAGAAGATAGCGAGGAAGGCATCCTCTTCAGATGATGAAGGAGGGCCAAGAACACTGGGTGGGGATGGCCACAGAGCGGAGGAGGCTAGCATAGACAAAGAAG	GTCAAGAGTGCCACATTCTCATCCACGGAGATCACGGCGTCTGGAATGCAGGATGAGGTCAGAGCGGTTGGCGAGGAGCAAATGTCAGAGGAGCCAAAGCGCAGGGTGGATACTTCAGTGTCTTGGGAGGCGTTGATTTGTGTCGGATCGTCCAAGAAGATAGCGAGGAAGGCATCCTCTTCAGATGATGAAGGAGGGCCAAGAACACTGGGTGGGGATGGCCACAGAGCGGAGGAGGCTAGCATAGACAAAGAAG	1	8 Base Changes	VKSATFSSTEITASGMQDEVRAVGEEQMSEEPKRRVDTSVSWEALICVGSSKKIARKASSSDDEGGPRTLGGDGHRAEEASIDKE	VKSATLSSTESTASGMQDEVRAVGEEQRSEEPKRRVDTSVSWEALICVGSSKKRARKASSSDDEGGPRTLGGDGHRAEEASKDKE
GTCAAGAGTGCCACATTGTCATCCACGGAGAGCACGGCGTCTGGAATGCAGGATGAGGTCAGAGCGGTTGGCGAGGAGCATAGGTCAGAGGAGCCAAAGCGCAGGGTGGATACTTCAGTGTCTTGGGAGGCGTTGATTTGTGTCGGATCGTCCAAGAAGAGAGCGAGGAAGGCATCCTCTTCAGATGATGAAGGAGGGCCAAGAACACTGGGAGGGGATGGCCACAGAGCGGAGTAGGCTAGCAAAGACAAAGAAG	GTCAAGAGTGCCACATTGTCATCCACGGAGAGCACGGCGTCTGGAATGCAGGATGAGGTCAGAGCGGTTGGCGAGGAGCATAGGTCAGAGGAGCCAAAGCGCAGGGTGGATACTTCAGTGTCTTGGGAGGCGTTGATTTGTGTCGGATCGTCCAAGAAGAGAGCGAGGAAGGCATCCTCTTCAGATGATGAAGGAGGGCCAAGAACACTGGGAGGGGATGGCCACAGAGCGGAGTAGGCTAGCAAAGACAAAGAAG	1	4 Base Changes	VKSATLSSTESTASGMQDEVRAVGEEHRSEEPKRRVDTSVSWEALICVGSSKKRARKASSSDDEGGPRTLGGDGHRAE*	VKSATLSSTESTASGMQDEVRAVGEEQRSEEPKRRVDTSVSWEALICVGSSKKRARKASSSDDEGGPRTLGGDGHRAEEASKDKE
GTCAAGAGTGCCACATTGTCATCCACGGAGAGCACGGCGTCTGTAATGCAGGATGAGGTCAGAGCGGTTGGCGAGGAGCAAAGGTCAGAGGAGCCAAAGCGCAGGGTGGATACTTCAGTGTCTTGGGAGGCGTTGATTTGTGTCGGATCGTCCAAGAAGAGAGCGAGGAAGGCATCCTCTTCAGATGATGAAGGAGGGCCAAGAACACTGGGAGGGGATGGCCACAGAGCGGAGGAGGCTAGCAAAGACAAAGAAG	GTCAAGAGTGCCACATTGTCATCCACGGAGAGCACGGCGTCTGTAATGCAGGATGAGGTCAGAGCGGTTGGCGAGGAGCAAAGGTCAGAGGAGCCAAAGCGCAGGGTGGATACTTCAGTGTCTTGGGAGGCGTTGATTTGTGTCGGATCGTCCAAGAAGAGAGCGAGGAAGGCATCCTCTTCAGATGATGAAGGAGGGCCAAGAACACTGGGAGGGGATGGCCACAGAGCGGAGGAGGCTAGCAAAGACAAAGAAG	1	3 Base Changes	VKSATLSSTESTASVMQDEVRAVGEEQRSEEPKRRVDTSVSWEALICVGSSKKRARKASSSDDEGGPRTLGGDGHRAEEASKDKE	VKSATLSSTESTASGMQDEVRAVGEEQRSEEPKRRVDTSVSWEALICVGSSKKRARKASSSDDEGGPRTLGGDGHRAEEASKDKE
GTCAAGAGTGCCACATTGTCCACCACGGAGAGCACGGCGTCTGGAATGCAGGATGAGGTCAGAGCGGTTGGCGAGGAGCAAAGGTCAGAGGAGCCAAAGCGCAGGGTCGATACTTCAGTGTCTTGGGAGGCGTTGATTTGTGTCGGATCGTCCAAGAAGAGAGCGAGGAAGGCATCCTCTTCAGATGATGAAGGAGGGCCAAGAACACTGGGAGGGGATGGCCACAGAGCGGAGGAGGCTAGCAAAGACAAAGAAG	GTCAAGAGTGCCACATTGTCCACCACGGAGAGCACGGCGTCTGGAATGCAGGATGAGGTCAGAGCGGTTGGCGAGGAGCAAAGGTCAGAGGAGCCAAAGCGCAGGGTCGATACTTCAGTGTCTTGGGAGGCGTTGATTTGTGTCGGATCGTCCAAGAAGAGAGCGAGGAAGGCATCCTCTTCAGATGATGAAGGAGGGCCAAGAACACTGGGAGGGGATGGCCACAGAGCGGAGGAGGCTAGCAAAGACAAAGAAG	1	3 Base Changes	VKSATLSTTESTASGMQDEVRAVGEEQRSEEPKRRVDTSVSWEALICVGSSKKRARKASSSDDEGGPRTLGGDGHRAEEASKDKE	VKSATLSSTESTASGMQDEVRAVGEEQRSEEPKRRVDTSVSWEALICVGSSKKRARKASSSDDEGGPRTLGGDGHRAEEASKDKE
GTCAAGAGTGCCACATTGTCCACCACGGAGAGCACGGCGTCTGGAATGCAGGATGAGGTCAGAGCGGTTGGCGAGGAGCAAAGGTCAGAGGAGCCAAAGCGCAGGGTGGATAATTCAGTGTCTTGGGAGGCGTTGATTTGTGTCGGATCGTCCAAGAAGAGAGCGAGGAAGGCATCCTCTTCAGATGATGAAGGAGGGCCAAGAACACTGGGAGGGGATGGCCACAGAGCGTAGGAGGCTAGCAAAGACAAAGAAG	GTCAAGAGTGCCACATTGTCCACCACGGAGAGCACGGCGTCTGGAATGCAGGATGAGGTCAGAGCGGTTGGCGAGGAGCAAAGGTCAGAGGAGCCAAAGCGCAGGGTGGATAATTCAGTGTCTTGGGAGGCGTTGATTTGTGTCGGATCGTCCAAGAAGAGAGCGAGGAAGGCATCCTCTTCAGATGATGAAGGAGGGCCAAGAACACTGGGAGGGGATGGCCACAGAGCGTAGGAGGCTAGCAAAGACAAAGAAG	1	4 Base Changes	VKSATLSTTESTASGMQDEVRAVGEEQRSEEPKRRVDNSVSWEALICVGSSKKRARKASSSDDEGGPRTLGGDGHRA*	VKSATLSSTESTASGMQDEVRAVGEEQRSEEPKRRVDTSVSWEALICVGSSKKRARKASSSDDEGGPRTLGGDGHRAEEASKDKE
GTCAAGAGTGCCACATTGTCCACCACGGAGAGCACGGCGTCTGGAATGCAGGATGAGGTCAGAGCGGTTGGCGAGGAGCAAAGGTCAGAGGAGCCAAAGCGCAGGGTGGATACTTCAGTGTCTTGGGAGGCGTTGATTTGTGTCGGATCGTCCAAGAAGAGAGCGAGGAAGGCATCCTCTTCAGATGATGAAGGAGGGCCAAGAACACTGGGAGGGGATGGCCACAGAGCGGAGGAGGCTAGCAAAGACAAAGAAG	GTCAAGAGTGCCACATTGTCCACCACGGAGAGCACGGCGTCTGGAATGCAGGATGAGGTCAGAGCGGTTGGCGAGGAGCAAAGGTCAGAGGAGCCAAAGCGCAGGGTGGATACTTCAGTGTCTTGGGAGGCGTTGATTTGTGTCGGATCGTCCAAGAAGAGAGCGAGGAAGGCATCCTCTTCAGATGATGAAGGAGGGCCAAGAACACTGGGAGGGGATGGCCACAGAGCGGAGGAGGCTAGCAAAGACAAAGAAG	1	2 Base Changes	VKSATLSTTESTASGMQDEVRAVGEEQRSEEPKRRVDTSVSWEALICVGSSKKRARKASSSDDEGGPRTLGGDGHRAEEASKDKE	VKSATLSSTESTASGMQDEVRAVGEEQRSEEPKRRVDTSVSWEALICVGSSKKRARKASSSDDEGGPRTLGGDGHRAEEASKDKE
GTCAAGAGTGCCACATTGTCCACCACGGAGAGCACGGCGTCTGGAATGCAGGATGAGGTCAGAGCGGTTGGCGAGGAGCAAAGGTCAGAGGAGCCAAAGCGCAGGGTGGATACTTCAGTGTCTTGGGAGGCGTTGATTTGTGTCGGATCGTCCAAGAAGAGAGCGAGGAAGGCATCCTCTTCAGATGATGAAGGAGGGCCAAGAACACTGGGAGGGGATGGCCACAGAGCGTAGGAGGATAGCAAAGACAAAGAAG	GTCAAGAGTGCCACATTGTCCACCACGGAGAGCACGGCGTCTGGAATGCAGGATGAGGTCAGAGCGGTTGGCGAGGAGCAAAGGTCAGAGGAGCCAAAGCGCAGGGTGGATACTTCAGTGTCTTGGGAGGCGTTGATTTGTGTCGGATCGTCCAAGAAGAGAGCGAGGAAGGCATCCTCTTCAGATGATGAAGGAGGGCCAAGAACACTGGGAGGGGATGGCCACAGAGCGTAGGAGGATAGCAAAGACAAAGAAG	1	4 Base Changes	VKSATLSTTESTASGMQDEVRAVGEEQRSEEPKRRVDTSVSWEALICVGSSKKRARKASSSDDEGGPRTLGGDGHRA*	VKSATLSSTESTASGMQDEVRAVGEEQRSEEPKRRVDTSVSWEALICVGSSKKRARKASSSDDEGGPRTLGGDGHRAEEASKDKE
GTCAAGAGTGCCACATTGTCCCCCACGGAGAGCACGGCGACTGGAATGCAGGATGAGGACAGAGCGGGTGGCGAGGAGCAAAGGTCAGAGGAGCCAAAGCGCAGGGTGGATACTTCAGTGTCTTGGGAGGCGTTGATTTGTGTCGGATCGTCCAAGAAGAGAGCGAGGAAGGCATCCTCTTCAGATGATGAAGGAGGGCCAAGAACACTGGGAGGGGGTGGCCACAGAGCGGAGGAGGCTAGCAAAGACAAAGAAG	GTCAAGAGTGCCACATTGTCCCCCACGGAGAGCACGGCGACTGGAATGCAGGATGAGGACAGAGCGGGTGGCGAGGAGCAAAGGTCAGAGGAGCCAAAGCGCAGGGTGGATACTTCAGTGTCTTGGGAGGCGTTGATTTGTGTCGGATCGTCCAAGAAGAGAGCGAGGAAGGCATCCTCTTCAGATGATGAAGGAGGGCCAAGAACACTGGGAGGGGGTGGCCACAGAGCGGAGGAGGCTAGCAAAGACAAAGAAG	1	6 Base Changes	VKSATLSPTESTATGMQDEDRAGGEEQRSEEPKRRVDTSVSWEALICVGSSKKRARKASSSDDEGGPRTLGGGGHRAEEASKDKE	VKSATLSSTESTASGMQDEVRAVGEEQRSEEPKRRVDTSVSWEALICVGSSKKRARKASSSDDEGGPRTLGGDGHRAEEASKDKE
GTCAAGAGTGCCACATTGTCCTACACGGAGAGCACGGCGTCTGGAATGCAGGATGAGGTCAGAGCGGTTGGCGAGGAGCAAAGGTCAGAGGAGCCAAAGCGCAGGGTGGATACTTCAGTGTCTTGGGAGGCGTTGATTTGTGTCGGATCGTCCAAGAAGAGAGCGAGGAAGGCATCCTCTTCAGATGATGAAGGAGGGCCAAGAACACTGGGAGGGGATGGCCACAGAGCGGAGGAGGCTAGCAAAGACAAAGAAG	GTCAAGAGTGCCACATTGTCCTACACGGAGAGCACGGCGTCTGGAATGCAGGATGAGGTCAGAGCGGTTGGCGAGGAGCAAAGGTCAGAGGAGCCAAAGCGCAGGGTGGATACTTCAGTGTCTTGGGAGGCGTTGATTTGTGTCGGATCGTCCAAGAAGAGAGCGAGGAAGGCATCCTCTTCAGATGATGAAGGAGGGCCAAGAACACTGGGAGGGGATGGCCACAGAGCGGAGGAGGCTAGCAAAGACAAAGAAG	1	2 Base Changes	VKSATLSYTESTASGMQDEVRAVGEEQRSEEPKRRVDTSVSWEALICVGSSKKRARKASSSDDEGGPRTLGGDGHRAEEASKDKE	VKSATLSSTESTASGMQDEVRAVGEEQRSEEPKRRVDTSVSWEALICVGSSKKRARKASSSDDEGGPRTLGGDGHRAEEASKDKE
GTCAAGAGTGCCACATTGTCCTCCACGGAGAGAACGGCGTCTGGAATGCATGATGAGGTCAGAGCGGTTTGAGAGGAGCAAAGGTCAGGTGAGCCAAAGAGCAGGGTGGATACTTCAGTGTCTTGGGAGGCGTTGATTTTTGTCGGATCGTCAAAGAAGAGAGCGAGGAAGGCATCCTCTTCAGATGATGAAGGAGGTCCAAGAACACTGGGAGGGGATGGCCACAGAGCTGAGGTGGCTAGCAAAGACAAAGAAG	GTCAAGAGTGCCACATTGTCCTCCACGGAGAGAACGGCGTCTGGAATGCATGATGAGGTCAGAGCGGTTTGAGAGGAGCAAAGGTCAGGTGAGCCAAAGAGCAGGGTGGATACTTCAGTGTCTTGGGAGGCGTTGATTTTTGTCGGATCGTCAAAGAAGAGAGCGAGGAAGGCATCCTCTTCAGATGATGAAGGAGGTCCAAGAACACTGGGAGGGGATGGCCACAGAGCTGAGGTGGCTAGCAAAGACAAAGAAG	1	13 Base Changes	VKSATLSSTERTASGMHDEVRAV*	VKSATLSSTESTASGMQDEVRAVGEEQRSEEPKRRVDTSVSWEALICVGSSKKRARKASSSDDEGGPRTLGGDGHRAEEASKDKE
GTCAAGAGTGCCACATTGTCCTCCACGGAGAGCACGGAGTCTGGAATGCAGGATGAGGTCAGAGCGGTTGGCGAGGAGCAAAGGTCAGAGGAGCCAAAGCGCAGGGTGGATACTTCAGTGTCTTTGGAGGAGTTGATTTGTGTCGGATCGTCCAAGAAGAGAGAGAGGAAGGCATCCTCTTCAGATGATGAAGGAGGGCCAAGAACACAGGGAGGGGATGGCCACAGAGCGGAGGAGGCTAGCAAAGACAAAGAAG	GTCAAGAGTGCCACATTGTCCTCCACGGAGAGCACGGAGTCTGGAATGCAGGATGAGGTCAGAGCGGTTGGCGAGGAGCAAAGGTCAGAGGAGCCAAAGCGCAGGGTGGATACTTCAGTGTCTTTGGAGGAGTTGATTTGTGTCGGATCGTCCAAGAAGAGAGAGAGGAAGGCATCCTCTTCAGATGATGAAGGAGGGCCAAGAACACAGGGAGGGGATGGCCACAGAGCGGAGGAGGCTAGCAAAGACAAAGAAG	1	6 Base Changes	VKSATLSSTESTESGMQDEVRAVGEEQRSEEPKRRVDTSVSLEELICVGSSKKRERKASSSDDEGGPRTQGGDGHRAEEASKDKE	VKSATLSSTESTASGMQDEVRAVGEEQRSEEPKRRVDTSVSWEALICVGSSKKRARKASSSDDEGGPRTLGGDGHRAEEASKDKE
GTCAAGAGTGCCACATTGTCCTCCACGGAGAGCACGGAGTCTGGAATGCAGGATGAGGTCAGAGCGTTTGGCGAGGAGCAAATGTCAGAGGAGCCAAATCGCAGGGTGGATACTTCAGTGTCTTGGGAGGAGTTGATTTGTGTCGGATCGTCCAAGAAGAGAGCGAGGAAGGCATCCTCTTCAGATGATGAAGGAGGGCCAAGAACACTGGGAGGGGATGGCCACAGAGCGGAGGAGGCTAGCAAAGACAAAGAAG	GTCAAGAGTGCCACATTGTCCTCCACGGAGAGCACGGAGTCTGGAATGCAGGATGAGGTCAGAGCGTTTGGCGAGGAGCAAATGTCAGAGGAGCCAAATCGCAGGGTGGATACTTCAGTGTCTTGGGAGGAGTTGATTTGTGTCGGATCGTCCAAGAAGAGAGCGAGGAAGGCATCCTCTTCAGATGATGAAGGAGGGCCAAGAACACTGGGAGGGGATGGCCACAGAGCGGAGGAGGCTAGCAAAGACAAAGAAG	1	6 Base Changes	VKSATLSSTESTESGMQDEVRAFGEEQMSEEPNRRVDTSVSWEELICVGSSKKRARKASSSDDEGGPRTLGGDGHRAEEASKDKE	VKSATLSSTESTASGMQDEVRAVGEEQRSEEPKRRVDTSVSWEALICVGSSKKRARKASSSDDEGGPRTLGGDGHRAEEASKDKE
GTCAAGAGTGCCACATTGTCCTCCACGGAGAGCACGGCGTCTGGAATGAAGGATGAGGTCAGATCGGTTGGCGAGGAGCAAAGGTCAGAGGAGACAAATCGCAGGGTGGATACTTCAGTGTCTTGGTAGGCGTTGATTTGTGTCGGATCGTCCAAGAAGAGAGCGAGGAAGGCATCCTCTTCAGATGATGAAGGAGGGCCAAGAACACTGGGAGGGGATGGCCACAGAGCGGAGGAGGCTATAAAAGACAAAGAAG	GTCAAGAGTGCCACATTGTCCTCCACGGAGAGCACGGCGTCTGGAATGAAGGATGAGGTCAGATCGGTTGGCGAGGAGCAAAGGTCAGAGGAGACAAATCGCAGGGTGGATACTTCAGTGTCTTGGTAGGCGTTGATTTGTGTCGGATCGTCCAAGAAGAGAGCGAGGAAGGCATCCTCTTCAGATGATGAAGGAGGGCCAAGAACACTGGGAGGGGATGGCCACAGAGCGGAGGAGGCTATAAAAGACAAAGAAG	1	8 Base Changes	VKSATLSSTESTASGMKDEVRSVGEEQRSEETNRRVDTSVSW*	VKSATLSSTESTASGMQDEVRAVGEEQRSEEPKRRVDTSVSWEALICVGSSKKRARKASSSDDEGGPRTLGGDGHRAEEASKDKE
GTCAAGAGTGCCACATTGTCCTCCACGGAGAGCACGGCGTCTGGAATGCAGGATGAGGTCAGAGCGGTTGGCGAGGAGAAAAGGTCAGAGGATCCAAAGCGCAGGTTGGATACTTCAGTGTCTTGGGAGGCGTTGATTTGTGTCGGATCGTCCAAGAAGAGAGCGAGGAAGGCATCCTCTTCAGATGATGAAGGAGGGCCAAGAACACTGGGAGGGGATGGCCACAGAGCGGAGGAGGCTAGCAAAGACAAAGAAG	GTCAAGAGTGCCACATTGTCCTCCACGGAGAGCACGGCGTCTGGAATGCAGGATGAGGTCAGAGCGGTTGGCGAGGAGAAAAGGTCAGAGGATCCAAAGCGCAGGTTGGATACTTCAGTGTCTTGGGAGGCGTTGATTTGTGTCGGATCGTCCAAGAAGAGAGCGAGGAAGGCATCCTCTTCAGATGATGAAGGAGGGCCAAGAACACTGGGAGGGGATGGCCACAGAGCGGAGGAGGCTAGCAAAGACAAAGAAG	1	4 Base Changes	VKSATLSSTESTASGMQDEVRAVGEEKRSEDPKRRLDTSVSWEALICVGSSKKRARKASSSDDEGGPRTLGGDGHRAEEASKDKE	VKSATLSSTESTASGMQDEVRAVGEEQRSEEPKRRVDTSVSWEALICVGSSKKRARKASSSDDEGGPRTLGGDGHRAEEASKDKE
GTCAAGAGTGCCACATTGTCCTCCACGGAGAGCACGGCGTCTGGAATGCAGGATGAGGTCAGAGCGGTTGGCGAGGAGCAAAGGTCAGAGGAGCAAAAGCGCAGGGTGGATACTTCAGTGTCTTGGGAGGCGTTGATTTGTGTCGGATCGTCCAAGAAGAGAGCGAGGAAGGCATCCTCTTCAGATGATGAAGGAGGGCCAAGAACACTGGGAGGGGATGGCCACAGAGCGGAGGAGGCTAGCAAAGACAAAGAAG	GTCAAGAGTGCCACATTGTCCTCCACGGAGAGCACGGCGTCTGGAATGCAGGATGAGGTCAGAGCGGTTGGCGAGGAGCAAAGGTCAGAGGAGCAAAAGCGCAGGGTGGATACTTCAGTGTCTTGGGAGGCGTTGATTTGTGTCGGATCGTCCAAGAAGAGAGCGAGGAAGGCATCCTCTTCAGATGATGAAGGAGGGCCAAGAACACTGGGAGGGGATGGCCACAGAGCGGAGGAGGCTAGCAAAGACAAAGAAG	1	2 Base Changes	VKSATLSSTESTASGMQDEVRAVGEEQRSEEQKRRVDTSVSWEALICVGSSKKRARKASSSDDEGGPRTLGGDGHRAEEASKDKE	VKSATLSSTESTASGMQDEVRAVGEEQRSEEPKRRVDTSVSWEALICVGSSKKRARKASSSDDEGGPRTLGGDGHRAEEASKDKE
GTCAAGAGTGCCACATTGTCCTCCACGGAGAGCACGGCGTCTGGAATGCAGGATGAGGTCAGAGCGGTTGGCGAGGAGCAAAGGTCAGAGGAGCCAAAGCGCAGGGTGGATACTTCAGTGTCTAGGGAGGCGTTGATTTGTGTCGGATCGTCCAAGAAGAGAGCGAGGAAGGCATCCTCTTCAGATGATGAAGGAGGGCCAAGAACACTGGGAGGGGATGGCCACAGAGCGGAGGAGGCTAGCAAAGACAAAGAAG	GTCAAGAGTGCCACATTGTCCTCCACGGAGAGCACGGCGTCTGGAATGCAGGATGAGGTCAGAGCGGTTGGCGAGGAGCAAAGGTCAGAGGAGCCAAAGCGCAGGGTGGATACTTCAGTGTCTAGGGAGGCGTTGATTTGTGTCGGATCGTCCAAGAAGAGAGCGAGGAAGGCATCCTCTTCAGATGATGAAGGAGGGCCAAGAACACTGGGAGGGGATGGCCACAGAGCGGAGGAGGCTAGCAAAGACAAAGAAG	1	2 Base Changes	VKSATLSSTESTASGMQDEVRAVGEEQRSEEPKRRVDTSVSREALICVGSSKKRARKASSSDDEGGPRTLGGDGHRAEEASKDKE	VKSATLSSTESTASGMQDEVRAVGEEQRSEEPKRRVDTSVSWEALICVGSSKKRARKASSSDDEGGPRTLGGDGHRAEEASKDKE
GTCAAGAGTGCCACATTGTCCTCCACGGAGAGCACGGCGTCTGGAATGCAGGATGAGGTCAGAGCGGTTGGCGAGGAGCAAAGGTCAGAGGAGCCAAAGCGCAGGGTGGATACTTCAGTGTCTTGGGAGGATTTGATTTGTGTCGGATCGTCCAAGAAGAGAGCGAGGAAGGCATCCTCTTCAGATGATGAATGAGGGCCAAGAACACTGGGAGGGGATGGCCACAGAGCGGAGGAGGCTAGCAAAGACAAAGAAG	GTCAAGAGTGCCACATTGTCCTCCACGGAGAGCACGGCGTCTGGAATGCAGGATGAGGTCAGAGCGGTTGGCGAGGAGCAAAGGTCAGAGGAGCCAAAGCGCAGGGTGGATACTTCAGTGTCTTGGGAGGATTTGATTTGTGTCGGATCGTCCAAGAAGAGAGCGAGGAAGGCATCCTCTTCAGATGATGAATGAGGGCCAAGAACACTGGGAGGGGATGGCCACAGAGCGGAGGAGGCTAGCAAAGACAAAGAAG	1	4 Base Changes	VKSATLSSTESTASGMQDEVRAVGEEQRSEEPKRRVDTSVSWEDLICVGSSKKRARKASSSDDE*	VKSATLSSTESTASGMQDEVRAVGEEQRSEEPKRRVDTSVSWEALICVGSSKKRARKASSSDDEGGPRTLGGDGHRAEEASKDKE
GTCAAGAGTGCCACATTGTCCTCCACGGAGAGCACGGCGTCTGGAATGCAGGATGAGGTCAGAGCGGTTGGCGAGGAGCAAAGGTCAGAGGAGCCAAAGCGCAGGGTGGATACTTCAGTGTCTTGGGAGGCGTTGATTTGTGTCGGATCGTCCAAGAAGAGAGCGAGGAAGGCATACTCTTCAGATGATGAAGGAGGGCCAAGAACACTGGGAGGGGATGGCCACAGAGCGGAGGAGGCTAGCAAAGACAAAGAAG	GTCAAGAGTGCCACATTGTCCTCCACGGAGAGCACGGCGTCTGGAATGCAGGATGAGGTCAGAGCGGTTGGCGAGGAGCAAAGGTCAGAGGAGCCAAAGCGCAGGGTGGATACTTCAGTGTCTTGGGAGGCGTTGATTTGTGTCGGATCGTCCAAGAAGAGAGCGAGGAAGGCATACTCTTCAGATGATGAAGGAGGGCCAAGAACACTGGGAGGGGATGGCCACAGAGCGGAGGAGGCTAGCAAAGACAAAGAAG	1	2 Base Changes	VKSATLSSTESTASGMQDEVRAVGEEQRSEEPKRRVDTSVSWEALICVGSSKKRARKAYSSDDEGGPRTLGGDGHRAEEASKDKE	VKSATLSSTESTASGMQDEVRAVGEEQRSEEPKRRVDTSVSWEALICVGSSKKRARKASSSDDEGGPRTLGGDGHRAEEASKDKE
GTCAAGAGTGCCACATTGTCCTCCACGGAGAGCACGGCGTCTGGAATGCAGGATGAGGTCAGAGCGGTTGGCGAGGAGCAAAGGTCAGAGGAGCCAAAGCGCAGGGTGGATACTTCAGTGTCTTGGGAGGCGTTGATTTGTGTCGGATCGTCCAAGAAGAGAGCGAGGAAGGCATCCTCTTCAGATGATGAAGGAGGGCCAAGAACACTGGGAGGGGATGGCCACAGAGCGGAGGAGGCTAGCAAAGAAAAAGAAG	GTCAAGAGTGCCACATTGTCCTCCACGGAGAGCACGGCGTCTGGAATGCAGGATGAGGTCAGAGCGGTTGGCGAGGAGCAAAGGTCAGAGGAGCCAAAGCGCAGGGTGGATACTTCAGTGTCTTGGGAGGCGTTGATTTGTGTCGGATCGTCCAAGAAGAGAGCGAGGAAGGCATCCTCTTCAGATGATGAAGGAGGGCCAAGAACACTGGGAGGGGATGGCCACAGAGCGGAGGAGGCTAGCAAAGAAAAAGAAG	1	2 Base Changes	VKSATLSSTESTASGMQDEVRAVGEEQRSEEPKRRVDTSVSWEALICVGSSKKRARKASSSDDEGGPRTLGGDGHRAEEASKEKE	VKSATLSSTESTASGMQDEVRAVGEEQRSEEPKRRVDTSVSWEALICVGSSKKRARKASSSDDEGGPRTLGGDGHRAEEASKDKE
GTCAAGAGTGCCACATTGTCCTCCACGGAGAGCACGGCGTCTGGAATGCAGGATGAGGTCAGAGCGGTTGGCGAGGAGCAAAGGTCAGAGGAGCCAAAGCGCAGGGTGGATACTTCAGTGTCTTGGGAGGCGTTGATTTGTGTCGGATCGTCCAAGAAGAGAGCGAGGAAGGCATCCTCTTCAGATGATGAAGGAGGGCCAAGAACACTGGGAGGGGATGGCCACAGAGCGGAGGAGGCTAGCAAAGACTAAGAAG	GTCAAGAGTGCCACATTGTCCTCCACGGAGAGCACGGCGTCTGGAATGCAGGATGAGGTCAGAGCGGTTGGCGAGGAGCAAAGGTCAGAGGAGCCAAAGCGCAGGGTGGATACTTCAGTGTCTTGGGAGGCGTTGATTTGTGTCGGATCGTCCAAGAAGAGAGCGAGGAAGGCATCCTCTTCAGATGATGAAGGAGGGCCAAGAACACTGGGAGGGGATGGCCACAGAGCGGAGGAGGCTAGCAAAGACTAAGAAG	1	2 Base Changes	VKSATLSSTESTASGMQDEVRAVGEEQRSEEPKRRVDTSVSWEALICVGSSKKRARKASSSDDEGGPRTLGGDGHRAEEASKD*	VKSATLSSTESTASGMQDEVRAVGEEQRSEEPKRRVDTSVSWEALICVGSSKKRARKASSSDDEGGPRTLGGDGHRAEEASKDKE
GTCAAGAGTGCCACATTGTCCTCCACGGAGAGCACGGCGTCTGGAATGCAGGATGAGGTCAGAGCGGTTGGCGAGGAGCAAAGGTCAGAGGAGCCAAAGCGCAGGGTGGATACTTCAGTGTCTTGGGAGGCGTTGATTTGTGTCGGATCGTCCAAGAAGAGAGCGAGGAAGGCATCCTCTTCAGATGATGAAGGAGGGCCAAGAACACTGGGAGGGGATGGCCACAGAGCGGAGGAGGCTAGCTAAGACAAAGAAG	GTCAAGAGTGCCACATTGTCCTCCACGGAGAGCACGGCGTCTGGAATGCAGGATGAGGTCAGAGCGGTTGGCGAGGAGCAAAGGTCAGAGGAGCCAAAGCGCAGGGTGGATACTTCAGTGTCTTGGGAGGCGTTGATTTGTGTCGGATCGTCCAAGAAGAGAGCGAGGAAGGCATCCTCTTCAGATGATGAAGGAGGGCCAAGAACACTGGGAGGGGATGGCCACAGAGCGGAGGAGGCTAGCTAAGACAAAGAAG	1	2 Base Changes	VKSATLSSTESTASGMQDEVRAVGEEQRSEEPKRRVDTSVSWEALICVGSSKKRARKASSSDDEGGPRTLGGDGHRAEEAS*	VKSATLSSTESTASGMQDEVRAVGEEQRSEEPKRRVDTSVSWEALICVGSSKKRARKASSSDDEGGPRTLGGDGHRAEEASKDKE
GTCAAGAGTGCCACATTGTCCTCCACGGAGAGCACGGCGTCTGGAATGCAGGATGAGGTCAGAGCGGTTGGCGAGGAGCAAAGGTCAGAGGAGCCAAAGCGCAGGGTGGATACTTCAGTGTCTTGGGAGGCGTTGATTTGTGTCGGATCGTCCAAGAAGAGAGCGAGGAAGGCATCCTCTTCAGATGATGAAGGATGGCCAAGAACACTGGGAGGGGATGGCCACAGAGCGGAGGAGGCTAGCAAAGACAAAGAAG	GTCAAGAGTGCCACATTGTCCTCCACGGAGAGCACGGCGTCTGGAATGCAGGATGAGGTCAGAGCGGTTGGCGAGGAGCAAAGGTCAGAGGAGCCAAAGCGCAGGGTGGATACTTCAGTGTCTTGGGAGGCGTTGATTTGTGTCGGATCGTCCAAGAAGAGAGCGAGGAAGGCATCCTCTTCAGATGATGAAGGATGGCCAAGAACACTGGGAGGGGATGGCCACAGAGCGGAGGAGGCTAGCAAAGACAAAGAAG	1	2 Base Changes	VKSATLSSTESTASGMQDEVRAVGEEQRSEEPKRRVDTSVSWEALICVGSSKKRARKASSSDDEGWPRTLGGDGHRAEEASKDKE	VKSATLSSTESTASGMQDEVRAVGEEQRSEEPKRRVDTSVSWEALICVGSSKKRARKASSSDDEGGPRTLGGDGHRAEEASKDKE
GTCAAGAGTGCCACATTGTCCTCCACGGAGAGCACGGCGTCTGGAATGCAGGATGAGGTCAGAGCGGTTGGCGAGGAGCAAAGGTCAGAGGAGCCAAAGCGCAGGGTGGATACTTCAGTGTCTTGGGAGGCGTTGATTTGTGTCGGATCGTCCAAGAAGCGAGCGAGGAAGGCATCCTCTTCAGATGATGAAGGAGGGCCAAGAACACTGGGAGGGGATGGCCACAGAGCGGAGGAGGCTAGCAAAGACAAAGAAG	GTCAAGAGTGCCACATTGTCCTCCACGGAGAGCACGGCGTCTGGAATGCAGGATGAGGTCAGAGCGGTTGGCGAGGAGCAAAGGTCAGAGGAGCCAAAGCGCAGGGTGGATACTTCAGTGTCTTGGGAGGCGTTGATTTGTGTCGGATCGTCCAAGAAGCGAGCGAGGAAGGCATCCTCTTCAGATGATGAAGGAGGGCCAAGAACACTGGGAGGGGATGGCCACAGAGCGGAGGAGGCTAGCAAAGACAAAGAAG	1	2 Base Changes	VKSATLSSTESTASGMQDEVRAVGEEQRSEEPKRRVDTSVSWEALICVGSSKKRARKASSSDDEGGPRTLGGDGHRAEEASKDKE	VKSATLSSTESTASGMQDEVRAVGEEQRSEEPKRRVDTSVSWEALICVGSSKKRARKASSSDDEGGPRTLGGDGHRAEEASKDKE
GTCAAGAGTGCCACATTGTCCTCCACGGAGAGCACGGCGTCTGGAATGCAGGATGAGGTCAGAGCGGTTGGCGAGGAGCAAAGGTCAGAGGAGCCAAAGCGCAGGGTGGATACTTCAGTGTCTTGGGAGGCGTTGATTTGTGTCGGATCGTCCATGAAGAGAGCGAGGAAGGCATCCTCTTCAGATGATGAAGGAGGGCCAAGAACACTGGGAGGGGATGGCCACAGAGCGGAGGAGGCTAGCAAATACAAAGAAG	GTCAAGAGTGCCACATTGTCCTCCACGGAGAGCACGGCGTCTGGAATGCAGGATGAGGTCAGAGCGGTTGGCGAGGAGCAAAGGTCAGAGGAGCCAAAGCGCAGGGTGGATACTTCAGTGTCTTGGGAGGCGTTGATTTGTGTCGGATCGTCCATGAAGAGAGCGAGGAAGGCATCCTCTTCAGATGATGAAGGAGGGCCAAGAACACTGGGAGGGGATGGCCACAGAGCGGAGGAGGCTAGCAAATACAAAGAAG	1	3 Base Changes	VKSATLSSTESTASGMQDEVRAVGEEQRSEEPKRRVDTSVSWEALICVGSSMKRARKASSSDDEGGPRTLGGDGHRAEEASKYKE	VKSATLSSTESTASGMQDEVRAVGEEQRSEEPKRRVDTSVSWEALICVGSSKKRARKASSSDDEGGPRTLGGDGHRAEEASKDKE
GTCAAGAGTGCCACATTGTCCTCCACGGAGAGCACGGCGTCTGGAATGCAGGATGAGGTCAGAGCGGTTGGCGAGGAGCAAAGGTCAGAGGAGCCAAAGCGCAGGGTGGATACTTCAGTGTCTTGGGAGGCGTTGATTTGTGTTGGATCGTCCAAGAAGAGAGCGAGGAAGGCATCCTCTTCAGATGATGAAGGAGGGCCAAGAACACTGGGAGGGGATGGCCACAGAGCGGAGGAGGCTAGCAAAGACAAAGAAG	GTCAAGAGTGCCACATTGTCCTCCACGGAGAGCACGGCGTCTGGAATGCAGGATGAGGTCAGAGCGGTTGGCGAGGAGCAAAGGTCAGAGGAGCCAAAGCGCAGGGTGGATACTTCAGTGTCTTGGGAGGCGTTGATTTGTGTTGGATCGTCCAAGAAGAGAGCGAGGAAGGCATCCTCTTCAGATGATGAAGGAGGGCCAAGAACACTGGGAGGGGATGGCCACAGAGCGGAGGAGGCTAGCAAAGACAAAGAAG	1	2 Base Changes	VKSATLSSTESTASGMQDEVRAVGEEQRSEEPKRRVDTSVSWEALICVGSSKKRARKASSSDDEGGPRTLGGDGHRAEEASKDKE	VKSATLSSTESTASGMQDEVRAVGEEQRSEEPKRRVDTSVSWEALICVGSSKKRARKASSSDDEGGPRTLGGDGHRAEEASKDKE
GTCAAGAGTGCCACATTGTCCTCCACGGAGAGCACGGCGTCTGGAATGCAGGATGAGGTCAGAGCGGTTGGCGAGGAGCAAAGGTCAGAGGAGCCAAAGCGCAGGGTGGATACTTCAGTGTCTTGGGAGGCGTTGATTTTTGTCGGATCGTCCAAGAAGAGAGCGAGGAAGGCATCCTCTTCAGATGATGAAGGAGGGCCAAGAACACTGGGAGGGGATGGCCACAGATCGGAGGAGGCTAGCAAAGACAAAGAAG	GTCAAGAGTGCCACATTGTCCTCCACGGAGAGCACGGCGTCTGGAATGCAGGATGAGGTCAGAGCGGTTGGCGAGGAGCAAAGGTCAGAGGAGCCAAAGCGCAGGGTGGATACTTCAGTGTCTTGGGAGGCGTTGATTTTTGTCGGATCGTCCAAGAAGAGAGCGAGGAAGGCATCCTCTTCAGATGATGAAGGAGGGCCAAGAACACTGGGAGGGGATGGCCACAGATCGGAGGAGGCTAGCAAAGACAAAGAAG	1	3 Base Changes	VKSATLSSTESTASGMQDEVRAVGEEQRSEEPKRRVDTSVSWEALIFVGSSKKRARKASSSDDEGGPRTLGGDGHRSEEASKDKE	VKSATLSSTESTASGMQDEVRAVGEEQRSEEPKRRVDTSVSWEALICVGSSKKRARKASSSDDEGGPRTLGGDGHRAEEASKDKE
GTCAAGAGTGCCACATTGTCCTCCACGGAGAGCACGGCGTCTGGAATGCAGGATGAGGTCAGAGCGGTTGGCGAGGAGCAAAGGTCAGAGGAGCCAAAGCGCAGGGTGGATACTTCAGTTTCTTGGGAGGCGTTCATTTGTGTCGGATCGTCCAAGAAGAGAGCGAGGAAGGCATCCTCTTCAGATGATGAAGGAGGGCCAAGAACACTGGGAGGGGATGGCCACAGAGCGGAGGAGGCTAGCAAAGACAAAGAAG	GTCAAGAGTGCCACATTGTCCTCCACGGAGAGCACGGCGTCTGGAATGCAGGATGAGGTCAGAGCGGTTGGCGAGGAGCAAAGGTCAGAGGAGCCAAAGCGCAGGGTGGATACTTCAGTTTCTTGGGAGGCGTTCATTTGTGTCGGATCGTCCAAGAAGAGAGCGAGGAAGGCATCCTCTTCAGATGATGAAGGAGGGCCAAGAACACTGGGAGGGGATGGCCACAGAGCGGAGGAGGCTAGCAAAGACAAAGAAG	1	3 Base Changes	VKSATLSSTESTASGMQDEVRAVGEEQRSEEPKRRVDTSVSWEAFICVGSSKKRARKASSSDDEGGPRTLGGDGHRAEEASKDKE	VKSATLSSTESTASGMQDEVRAVGEEQRSEEPKRRVDTSVSWEALICVGSSKKRARKASSSDDEGGPRTLGGDGHRAEEASKDKE
GTCAAGAGTGCCACATTGTCCTCCACGGAGAGCACGGCGTCTGGAATGCAGGATGAGGTCAGAGCGGTTGGCGAGGAGCAAAGGTCAGAGGAGCCAAAGCGCAGGGTGGATTATTCAGTGTCTTGGGAGGCGTTGATGTGTGTCGGATCGTCCAAGAAGAGAGCGAGGAAGGCATCCTCTTCAGATGATGAAGGAGGGCCAAGAACACTGGGAGGGGATGGCCACTGAGCGGAGGAGGCTAGCAAAGACAAAGAAG	GTCAAGAGTGCCACATTGTCCTCCACGGAGAGCACGGCGTCTGGAATGCAGGATGAGGTCAGAGCGGTTGGCGAGGAGCAAAGGTCAGAGGAGCCAAAGCGCAGGGTGGATTATTCAGTGTCTTGGGAGGCGTTGATGTGTGTCGGATCGTCCAAGAAGAGAGCGAGGAAGGCATCCTCTTCAGATGATGAAGGAGGGCCAAGAACACTGGGAGGGGATGGCCACTGAGCGGAGGAGGCTAGCAAAGACAAAGAAG	1	5 Base Changes	VKSATLSSTESTASGMQDEVRAVGEEQRSEEPKRRVDYSVSWEALMCVGSSKKRARKASSSDDEGGPRTLGGDGH*	VKSATLSSTESTASGMQDEVRAVGEEQRSEEPKRRVDTSVSWEALICVGSSKKRARKASSSDDEGGPRTLGGDGHRAEEASKDKE
GTCAAGAGTGCCACATTGTCCTCCACGGAGAGCACGGCGTCTGGAATGCAGGATGAGGTCAGAGCGGTTGGCGAGGAGCAAAGGTCAGAGGAGCCAAAGCGCATGGTGGATACTTCAGTGTCTTGGGAGGCGTTGATTTGTGTCGGATCGTCCAAGAAGAGAGCGAGGAATGCATCCTCTTCAGATGATGAAGGAGGGCCAAGAACACTGGGAGGTGATGGCCACAGAGCGGAGGAGGCTAGAAAAGACAAAGAAG	GTCAAGAGTGCCACATTGTCCTCCACGGAGAGCACGGCGTCTGGAATGCAGGATGAGGTCAGAGCGGTTGGCGAGGAGCAAAGGTCAGAGGAGCCAAAGCGCATGGTGGATACTTCAGTGTCTTGGGAGGCGTTGATTTGTGTCGGATCGTCCAAGAAGAGAGCGAGGAATGCATCCTCTTCAGATGATGAAGGAGGGCCAAGAACACTGGGAGGTGATGGCCACAGAGCGGAGGAGGCTAGAAAAGACAAAGAAG	1	5 Base Changes	VKSATLSSTESTASGMQDEVRAVGEEQRSEEPKRMVDTSVSWEALICVGSSKKRARNASSSDDEGGPRTLGGDGHRAEEARKDKE	VKSATLSSTESTASGMQDEVRAVGEEQRSEEPKRRVDTSVSWEALICVGSSKKRARKASSSDDEGGPRTLGGDGHRAEEASKDKE
GTCAAGAGTGCCACATTGTCCTCCACGGAGAGCACGGCGTCTGGAATGCAGGATGAGGTCAGAGCGGTTGGCGAGGAGCAAGGGTCAGAGGAGCCAAAGCGCAGGGGGGATACTTCAGTGTCTTGGGAGGCGTTGATTTGTGTCGGATCGTCCAAGAATAGAGCGAGGAAGGCATCCTCTTCAGATGATGAAGGAGGGCCAAGAACACTGGGAGGGGATGGCCACAGAGCGGAGGAGGCTAGCAAAGACAAAGAAG	GTCAAGAGTGCCACATTGTCCTCCACGGAGAGCACGGCGTCTGGAATGCAGGATGAGGTCAGAGCGGTTGGCGAGGAGCAAGGGTCAGAGGAGCCAAAGCGCAGGGGGGATACTTCAGTGTCTTGGGAGGCGTTGATTTGTGTCGGATCGTCCAAGAATAGAGCGAGGAAGGCATCCTCTTCAGATGATGAAGGAGGGCCAAGAACACTGGGAGGGGATGGCCACAGAGCGGAGGAGGCTAGCAAAGACAAAGAAG	1	4 Base Changes	VKSATLSSTESTASGMQDEVRAVGEEQGSEEPKRRGDTSVSWEALICVGSSKNRARKASSSDDEGGPRTLGGDGHRAEEASKDKE	VKSATLSSTESTASGMQDEVRAVGEEQRSEEPKRRVDTSVSWEALICVGSSKKRARKASSSDDEGGPRTLGGDGHRAEEASKDKE
GTCAAGAGTGCCACATTGTCCTCCACGGAGAGCACGGCGTCTGGAATGCAGGATGAGGTCAGAGCGGTTGGCGAGGAGCAAGGGTCAGAGGAGCCAAAGCGCAGGGTGGATACTTCAGTGTCTTGGGAGGCGTTGATTTGTGTCGGATCGTCCAAGAAGAGAGCGAGGAAGGCATCCTCTTCAGATGATGAAGGAGGGCCAAGAACACTGGGAGGGGATGGCCACGGAGCGGAGGAGGCTAGCAAAGACAAAGAAG	GTCAAGAGTGCCACATTGTCCTCCACGGAGAGCACGGCGTCTGGAATGCAGGATGAGGTCAGAGCGGTTGGCGAGGAGCAAGGGTCAGAGGAGCCAAAGCGCAGGGTGGATACTTCAGTGTCTTGGGAGGCGTTGATTTGTGTCGGATCGTCCAAGAAGAGAGCGAGGAAGGCATCCTCTTCAGATGATGAAGGAGGGCCAAGAACACTGGGAGGGGATGGCCACGGAGCGGAGGAGGCTAGCAAAGACAAAGAAG	1	3 Base Changes	VKSATLSSTESTASGMQDEVRAVGEEQGSEEPKRRVDTSVSWEALICVGSSKKRARKASSSDDEGGPRTLGGDGHGAEEASKDKE	VKSATLSSTESTASGMQDEVRAVGEEQRSEEPKRRVDTSVSWEALICVGSSKKRARKASSSDDEGGPRTLGGDGHRAEEASKDKE
GTCAAGAGTGCCACATTGTCCTCCACGGAGAGCACGGCGTCTGGAATGCAGGATGAGGTCAGAGCGGTTGGCTAGGAGCAAAGGTCAGAGGAGCCAAAGCGCAGGGTGGATACTTCAGTGTCTTGGGAGGCGTTTATTTGTGTCGGATCGTCCAAGAAGAGAGCGAGGAAGGCATCCTCTTCAGATGATGAAGGAGGGCCAAGAACACTGGGAGGGGATGGCCACAGAGCGGAGGAGGCTAGCAAAGACAAAGAAG	GTCAAGAGTGCCACATTGTCCTCCACGGAGAGCACGGCGTCTGGAATGCAGGATGAGGTCAGAGCGGTTGGCTAGGAGCAAAGGTCAGAGGAGCCAAAGCGCAGGGTGGATACTTCAGTGTCTTGGGAGGCGTTTATTTGTGTCGGATCGTCCAAGAAGAGAGCGAGGAAGGCATCCTCTTCAGATGATGAAGGAGGGCCAAGAACACTGGGAGGGGATGGCCACAGAGCGGAGGAGGCTAGCAAAGACAAAGAAG	1	3 Base Changes	VKSATLSSTESTASGMQDEVRAVG*	VKSATLSSTESTASGMQDEVRAVGEEQRSEEPKRRVDTSVSWEALICVGSSKKRARKASSSDDEGGPRTLGGDGHRAEEASKDKE
GTCAAGAGTGCCACATTGTCCTCCACGGAGAGCACGGCGTCTGGAATGCAGGATGAGTTCAGAGCGGTTGGCGAGGAGCAAAGGGCAGAGGAGCCAAAGCGCAGGGTGGATACTTCAGTGTCTTGGGAGGCGTTGATTTGTGTCGGATCGTCCAAGAAGAGAGCGAGGAAGGCATCCTCTTCAGATGATGAAGGAGGGCCAAGAACACTGGGAGGGGATGGCCACAGAGCGGAGGAGGCTAGCAAAGACAAAGAAG	GTCAAGAGTGCCACATTGTCCTCCACGGAGAGCACGGCGTCTGGAATGCAGGATGAGTTCAGAGCGGTTGGCGAGGAGCAAAGGGCAGAGGAGCCAAAGCGCAGGGTGGATACTTCAGTGTCTTGGGAGGCGTTGATTTGTGTCGGATCGTCCAAGAAGAGAGCGAGGAAGGCATCCTCTTCAGATGATGAAGGAGGGCCAAGAACACTGGGAGGGGATGGCCACAGAGCGGAGGAGGCTAGCAAAGACAAAGAAG	1	3 Base Changes	VKSATLSSTESTASGMQDEFRAVGEEQRAEEPKRRVDTSVSWEALICVGSSKKRARKASSSDDEGGPRTLGGDGHRAEEASKDKE	VKSATLSSTESTASGMQDEVRAVGEEQRSEEPKRRVDTSVSWEALICVGSSKKRARKASSSDDEGGPRTLGGDGHRAEEASKDKE
GTCAAGAGTGCCACATTGTCCTCCACGGAGAGCACGGCGTCTGGAATGCGGGATGAGGTCAGAGCGGTTGGCGAGGAGCAAAGGTCAGAGGAGCCAAAGCGCAGGGTGGATACTTCAGTGTCTTGGGAGGCGTTGATTTGGGTCGGATCGTCCAAGAAGAGAGCGAGGAAGGCATCCTCTTCAGATGATGAAGGAGGGCCAAGAACACTGGGAGGGGATGGCCACAGAGCGGAGGAGGCTAGCAAAGACAAAGAAG	GTCAAGAGTGCCACATTGTCCTCCACGGAGAGCACGGCGTCTGGAATGCGGGATGAGGTCAGAGCGGTTGGCGAGGAGCAAAGGTCAGAGGAGCCAAAGCGCAGGGTGGATACTTCAGTGTCTTGGGAGGCGTTGATTTGGGTCGGATCGTCCAAGAAGAGAGCGAGGAAGGCATCCTCTTCAGATGATGAAGGAGGGCCAAGAACACTGGGAGGGGATGGCCACAGAGCGGAGGAGGCTAGCAAAGACAAAGAAG	1	3 Base Changes	VKSATLSSTESTASGMRDEVRAVGEEQRSEEPKRRVDTSVSWEALIWVGSSKKRARKASSSDDEGGPRTLGGDGHRAEEASKDKE	VKSATLSSTESTASGMQDEVRAVGEEQRSEEPKRRVDTSVSWEALICVGSSKKRARKASSSDDEGGPRTLGGDGHRAEEASKDKE
GTCAAGAGTGCCACATTGTCCTCCACGGAGAGCACGGCGTCTGGAATTCAGGATGAGGTCAGAGCGGTTGGCGAGGAGCAAAGGTCAGAGGGGCCAAAGCGAAGGGTGGATACTTCAGTGTCTTGGGAGGCGTTGATTTGTGTAGGATCGTCAAAGAAGAGAGCTAGGAAGGCATCCTCTTCAGATGATGAAGGAGGGACAAGAACACTGGGAGGGGATGGCCACAGAGCGGAGGAGGCTAGCAAAGACAAAGAAG	GTCAAGAGTGCCACATTGTCCTCCACGGAGAGCACGGCGTCTGGAATTCAGGATGAGGTCAGAGCGGTTGGCGAGGAGCAAAGGTCAGAGGGGCCAAAGCGAAGGGTGGATACTTCAGTGTCTTGGGAGGCGTTGATTTGTGTAGGATCGTCAAAGAAGAGAGCTAGGAAGGCATCCTCTTCAGATGATGAAGGAGGGACAAGAACACTGGGAGGGGATGGCCACAGAGCGGAGGAGGCTAGCAAAGACAAAGAAG	1	8 Base Changes	VKSATLSSTESTASGIQDEVRAVGEEQRSEGPKRRVDTSVSWEALICVGSSKKRARKASSSDDEGGTRTLGGDGHRAEEASKDKE	VKSATLSSTESTASGMQDEVRAVGEEQRSEEPKRRVDTSVSWEALICVGSSKKRARKASSSDDEGGPRTLGGDGHRAEEASKDKE
GTCAAGAGTGCCACATTGTCCTCCACGGAGAGCACGGCGTCTGGAGTGCAGGATGAGGTCAGAGCGGTTGGCGAGGAGCAAAGGTCAGAGGAGCCAAAGCGCAGGGTGGATACTTCAGTGTCTTGGGAGGCGTTGATTTGTGTCGGATCGTCCAAGAAGAGAGCGAGGAAGGCATCCTCTTCAGATGATGAAGGAGGGCCAAGAACACTGGGAGGGGATGGCCACAGAGCGGAGGAGGCTAGCAAAGACAAAGAAG	GTCAAGAGTGCCACATTGTCCTCCACGGAGAGCACGGCGTCTGGAGTGCAGGATGAGGTCAGAGCGGTTGGCGAGGAGCAAAGGTCAGAGGAGCCAAAGCGCAGGGTGGATACTTCAGTGTCTTGGGAGGCGTTGATTTGTGTCGGATCGTCCAAGAAGAGAGCGAGGAAGGCATCCTCTTCAGATGATGAAGGAGGGCCAAGAACACTGGGAGGGGATGGCCACAGAGCGGAGGAGGCTAGCAAAGACAAAGAAG	1	2 Base Changes	VKSATLSSTESTASGVQDEVRAVGEEQRSEEPKRRVDTSVSWEALICVGSSKKRARKASSSDDEGGPRTLGGDGHRAEEASKDKE	VKSATLSSTESTASGMQDEVRAVGEEQRSEEPKRRVDTSVSWEALICVGSSKKRARKASSSDDEGGPRTLGGDGHRAEEASKDKE
GTCAAGAGTGCCACATTGTCCTCCCCGGAGAGCACGGCGTCTGGAATGCAGGATGAGGTCAGAGCGGTTGGCGAGGAGCAAAGGTCAGAGGAGCCAAAGCGCAGGGTGGATACTTCAGTGTCTTGGGAGGCGTTGATTTGTGTCGGATCGTCCAAGAAGAGAGCGAGGAAGGCATCCTCTTCAGATGATGAAGGAGGGCCAAGAACACTGGGAGGGGATGGCCACAGAGCGGAGGAGGCTAGCAAAGACAAAGAAG	GTCAAGAGTGCCACATTGTCCTCCCCGGAGAGCACGGCGTCTGGAATGCAGGATGAGGTCAGAGCGGTTGGCGAGGAGCAAAGGTCAGAGGAGCCAAAGCGCAGGGTGGATACTTCAGTGTCTTGGGAGGCGTTGATTTGTGTCGGATCGTCCAAGAAGAGAGCGAGGAAGGCATCCTCTTCAGATGATGAAGGAGGGCCAAGAACACTGGGAGGGGATGGCCACAGAGCGGAGGAGGCTAGCAAAGACAAAGAAG	1	2 Base Changes	VKSATLSSPESTASGMQDEVRAVGEEQRSEEPKRRVDTSVSWEALICVGSSKKRARKASSSDDEGGPRTLGGDGHRAEEASKDKE	VKSATLSSTESTASGMQDEVRAVGEEQRSEEPKRRVDTSVSWEALICVGSSKKRARKASSSDDEGGPRTLGGDGHRAEEASKDKE
GTCAAGAGTGCCACATTTTCCTCCACGGAGAGCACGGCGTCTGGAATGCAGGATGAGGTAAGAGCGGTTGGCGAGGAGCAAAGGTCAGAGGAGCCAAAGCGCAGGGTGGATACTTAAGTGTCTTGGGAGGCGTTGATTTGTGTCGGATCGTCAAAGAATAGAGCGAGGAAGGCATCCTCTTCAGATGATGAAGGAGGGCCAAGAACACTGGGAGGGGATGGCCACAGAGCGGAGGAGGCTAGCAAAGACAAAGAAG	GTCAAGAGTGCCACATTTTCCTCCACGGAGAGCACGGCGTCTGGAATGCAGGATGAGGTAAGAGCGGTTGGCGAGGAGCAAAGGTCAGAGGAGCCAAAGCGCAGGGTGGATACTTAAGTGTCTTGGGAGGCGTTGATTTGTGTCGGATCGTCAAAGAATAGAGCGAGGAAGGCATCCTCTTCAGATGATGAAGGAGGGCCAAGAACACTGGGAGGGGATGGCCACAGAGCGGAGGAGGCTAGCAAAGACAAAGAAG	1	6 Base Changes	VKSATFSSTESTASGMQDEVRAVGEEQRSEEPKRRVDT*	VKSATLSSTESTASGMQDEVRAVGEEQRSEEPKRRVDTSVSWEALICVGSSKKRARKASSSDDEGGPRTLGGDGHRAEEASKDKE
GTCAAGAGTGCCACATTTTCCTCCACGGAGAGCACGGCGTCTGGAATGCAGGATGAGGTCAGAGCGGTTGGCGAGGACCAAAGGTCAGAGGAGCCAAAGCGCAGGGTGGATACTTCAGTGTCTTGGGAGGCGTTGATTTGTGTCTGATCGTCCAAGAAGAGAGCGAGGAAGGCATCCTCTTCATATTATGAATTAGGGCCAAGAACACTGGGAGGGGATCGCCACAGAGCGGAGGAGGCTAGCAAAGACAAAGAAG	GTCAAGAGTGCCACATTTTCCTCCACGGAGAGCACGGCGTCTGGAATGCAGGATGAGGTCAGAGCGGTTGGCGAGGACCAAAGGTCAGAGGAGCCAAAGCGCAGGGTGGATACTTCAGTGTCTTGGGAGGCGTTGATTTGTGTCTGATCGTCCAAGAAGAGAGCGAGGAAGGCATCCTCTTCATATTATGAATTAGGGCCAAGAACACTGGGAGGGGATCGCCACAGAGCGGAGGAGGCTAGCAAAGACAAAGAAG	1	9 Base Changes	VKSATFSSTESTASGMQDEVRAVGEDQRSEEPKRRVDTSVSWEALICV*	VKSATLSSTESTASGMQDEVRAVGEEQRSEEPKRRVDTSVSWEALICVGSSKKRARKASSSDDEGGPRTLGGDGHRAEEASKDKE
GTCAAGAGTGCCACCAAGTCATCCACGGAGAGCACGGCGTCTGGAATGCAGGATGAGGTCAGAGCGGTTGGCGAGGAGCAAAGGTCAGAGGAGCCAAAGCGCAGGGTGGATACTTCAGTGTCTTGGGAGGCGTTGATTTGTGTCGGATCGTCCAAGAAGAGAGCGAGGAAGGCGTCGTCTTCAGATGATGAAGGAGGGCCAAGAACACTGGGAGGGGATGGCCACAGAGCGGAGGAGGCTAGCAAAGACAAAGAAG	GTCAAGAGTGCCACCAAGTCATCCACGGAGAGCACGGCGTCTGGAATGCAGGATGAGGTCAGAGCGGTTGGCGAGGAGCAAAGGTCAGAGGAGCCAAAGCGCAGGGTGGATACTTCAGTGTCTTGGGAGGCGTTGATTTGTGTCGGATCGTCCAAGAAGAGAGCGAGGAAGGCGTCGTCTTCAGATGATGAAGGAGGGCCAAGAACACTGGGAGGGGATGGCCACAGAGCGGAGGAGGCTAGCAAAGACAAAGAAG	1	5 Base Changes	VKSATKSSTESTASGMQDEVRAVGEEQRSEEPKRRVDTSVSWEALICVGSSKKRARKASSSDDEGGPRTLGGDGHRAEEASKDKE	VKSATLSSTESTASGMQDEVRAVGEEQRSEEPKRRVDTSVSWEALICVGSSKKRARKASSSDDEGGPRTLGGDGHRAEEASKDKE
GTCAAGAGTGCCACCAAGTCCTCCACGGAGAGCACGGCGTCTGGAATGCAGGATGAGGTCAGAGCGGTTGGCGAGGAGCAAAGGTCAGAGGAGCCAAAGCGCAGGGTGGATACTTCAGTGTCTTGGGAGGCGTTGATTTGTGTCGGATCGTCCAAGAAGAGAGCGAGGAAGGCACCCTCTTCAGATGATGAAGGAGGGCCAAGAACACTGGGAGGGGATGGCCACAGAGCGGAGGAGGCTAGCAAAGACAAAGAAG	GTCAAGAGTGCCACCAAGTCCTCCACGGAGAGCACGGCGTCTGGAATGCAGGATGAGGTCAGAGCGGTTGGCGAGGAGCAAAGGTCAGAGGAGCCAAAGCGCAGGGTGGATACTTCAGTGTCTTGGGAGGCGTTGATTTGTGTCGGATCGTCCAAGAAGAGAGCGAGGAAGGCACCCTCTTCAGATGATGAAGGAGGGCCAAGAACACTGGGAGGGGATGGCCACAGAGCGGAGGAGGCTAGCAAAGACAAAGAAG	1	3 Base Changes	VKSATKSSTESTASGMQDEVRAVGEEQRSEEPKRRVDTSVSWEALICVGSSKKRARKAPSSDDEGGPRTLGGDGHRAEEASKDKE	VKSATLSSTESTASGMQDEVRAVGEEQRSEEPKRRVDTSVSWEALICVGSSKKRARKASSSDDEGGPRTLGGDGHRAEEASKDKE
GTCAAGAGTGCCACCAAGTCCTCCACGGAGAGCACGGCGTCTGGAATGCAGGATGAGGTCAGAGCGGTTGGCGAGGAGCAAAGGTCAGAGGAGCCAAAGCGCAGGGTGGATACTTCAGTGTCTTGGGAGGCGTTGATTTGTGTCGGATCGTCCAAGAAGAGAGCGAGGAAGGCATCCTCTTCAGATGATGAAGGAGGGCCAAGAACACTGGGAGGGGATGGCCACAGAGCGGAGGAGGCTAGCAAAGACAAAGAAG	GTCAAGAGTGCCACCAAGTCCTCCACGGAGAGCACGGCGTCTGGAATGCAGGATGAGGTCAGAGCGGTTGGCGAGGAGCAAAGGTCAGAGGAGCCAAAGCGCAGGGTGGATACTTCAGTGTCTTGGGAGGCGTTGATTTGTGTCGGATCGTCCAAGAAGAGAGCGAGGAAGGCATCCTCTTCAGATGATGAAGGAGGGCCAAGAACACTGGGAGGGGATGGCCACAGAGCGGAGGAGGCTAGCAAAGACAAAGAAG	1	2 Base Changes	VKSATKSSTESTASGMQDEVRAVGEEQRSEEPKRRVDTSVSWEALICVGSSKKRARKASSSDDEGGPRTLGGDGHRAEEASKDKE	VKSATLSSTESTASGMQDEVRAVGEEQRSEEPKRRVDTSVSWEALICVGSSKKRARKASSSDDEGGPRTLGGDGHRAEEASKDKE
GTCAAGAGTGCCACCAAGTCCTCCACGGAGAGCACGGCGTCTGGAATGCAGGATGAGGTCAGAGCGGTTGGCGAGGAGCAAAGGTCAGAGGAGCCAAAGCGCAGGGTGGATACTTCAGTGTCTTGGGAGGCGTTGATTTGTGTCGGATCGTCCAAGAAGAGAGCGAGGAAGGCATCCTCTTCAGATGATGAAGGAGGGCCAAGAACACTGGGAGGGGATGGCCACAGAGCGGAGGAGGCTAGCTAAGACAAAGAAG	GTCAAGAGTGCCACCAAGTCCTCCACGGAGAGCACGGCGTCTGGAATGCAGGATGAGGTCAGAGCGGTTGGCGAGGAGCAAAGGTCAGAGGAGCCAAAGCGCAGGGTGGATACTTCAGTGTCTTGGGAGGCGTTGATTTGTGTCGGATCGTCCAAGAAGAGAGCGAGGAAGGCATCCTCTTCAGATGATGAAGGAGGGCCAAGAACACTGGGAGGGGATGGCCACAGAGCGGAGGAGGCTAGCTAAGACAAAGAAG	1	3 Base Changes	VKSATKSSTESTASGMQDEVRAVGEEQRSEEPKRRVDTSVSWEALICVGSSKKRARKASSSDDEGGPRTLGGDGHRAEEAS*	VKSATLSSTESTASGMQDEVRAVGEEQRSEEPKRRVDTSVSWEALICVGSSKKRARKASSSDDEGGPRTLGGDGHRAEEASKDKE
GTCAAGAGTGCCACCACGTCCTCCACGGAGAGCACGGCGTCTGGAATGCAGGATGAGGTCAGAGCGGTTGGCGAGGAGCAAAGGTCAGAGGAGCCAAAGCGCAGGGTGGATACTTCAGTGTCTTGGGAGGCGTTGATTTGTGTCGGATCGTCCAAGAAGAGAGCGAGGAAGGCATCCTCTTCAGATGATGAAAGAGGGCCAAGAACACTGGGAGGGGATGGCCACAGAGCGGAGGAGGCTAGCAAAGACAAAGAAG	GTCAAGAGTGCCACCACGTCCTCCACGGAGAGCACGGCGTCTGGAATGCAGGATGAGGTCAGAGCGGTTGGCGAGGAGCAAAGGTCAGAGGAGCCAAAGCGCAGGGTGGATACTTCAGTGTCTTGGGAGGCGTTGATTTGTGTCGGATCGTCCAAGAAGAGAGCGAGGAAGGCATCCTCTTCAGATGATGAAAGAGGGCCAAGAACACTGGGAGGGGATGGCCACAGAGCGGAGGAGGCTAGCAAAGACAAAGAAG	1	3 Base Changes	VKSATTSSTESTASGMQDEVRAVGEEQRSEEPKRRVDTSVSWEALICVGSSKKRARKASSSDDERGPRTLGGDGHRAEEASKDKE	VKSATLSSTESTASGMQDEVRAVGEEQRSEEPKRRVDTSVSWEALICVGSSKKRARKASSSDDEGGPRTLGGDGHRAEEASKDKE
GTCAAGAGTGCCACCATCTCCTCCACGGAGAGCACGGCGTCTGGAATGCAGGATGAGGTCAGAGCGGTTGGCGAGGAGCAAAGGTCAGAGGAGCCAAAGCGCAGGGTGGATACTTCAGTGTCTTGGGAGGCGTTGATTTGTGTCGGATCGTCCAAGAAGAGAGCGAGGAAGGCATCCTCTTCAGATGATGAAGGAGGGCCAAGAACACTGGGAGGGGATGGCCACAGAGCGGAGGAGGCTAGCAAAGACAAAGAAG	GTCAAGAGTGCCACCATCTCCTCCACGGAGAGCACGGCGTCTGGAATGCAGGATGAGGTCAGAGCGGTTGGCGAGGAGCAAAGGTCAGAGGAGCCAAAGCGCAGGGTGGATACTTCAGTGTCTTGGGAGGCGTTGATTTGTGTCGGATCGTCCAAGAAGAGAGCGAGGAAGGCATCCTCTTCAGATGATGAAGGAGGGCCAAGAACACTGGGAGGGGATGGCCACAGAGCGGAGGAGGCTAGCAAAGACAAAGAAG	1	2 Base Changes	VKSATISSTESTASGMQDEVRAVGEEQRSEEPKRRVDTSVSWEALICVGSSKKRARKASSSDDEGGPRTLGGDGHRAEEASKDKE	VKSATLSSTESTASGMQDEVRAVGEEQRSEEPKRRVDTSVSWEALICVGSSKKRARKASSSDDEGGPRTLGGDGHRAEEASKDKE
GTCAAGAGTGCCACCATGAACTCCACGGAGAGCACGGCGTCTGGAATGCAGGATGAGGTCAGAGCGGTTGGCGAGGAGCAAAGGTCAGAGGAGCCAAAGCGCAGGGTGGATACTTCAGTGTCTTGGGAGGCGTTGATTTGTGTCGGATCGTCCAAGAAGAGAGCGAGGAAGGCATCCTCTTCAGATGATGAAGGAGGGCCAAGAACACTGGGAGGGGATGGCCACAGAGCGGAGGAGGCTAGCAAAGACAAAGAAG	GTCAAGAGTGCCACCATGAACTCCACGGAGAGCACGGCGTCTGGAATGCAGGATGAGGTCAGAGCGGTTGGCGAGGAGCAAAGGTCAGAGGAGCCAAAGCGCAGGGTGGATACTTCAGTGTCTTGGGAGGCGTTGATTTGTGTCGGATCGTCCAAGAAGAGAGCGAGGAAGGCATCCTCTTCAGATGATGAAGGAGGGCCAAGAACACTGGGAGGGGATGGCCACAGAGCGGAGGAGGCTAGCAAAGACAAAGAAG	1	3 Base Changes	VKSATMNSTESTASGMQDEVRAVGEEQRSEEPKRRVDTSVSWEALICVGSSKKRARKASSSDDEGGPRTLGGDGHRAEEASKDKE	VKSATLSSTESTASGMQDEVRAVGEEQRSEEPKRRVDTSVSWEALICVGSSKKRARKASSSDDEGGPRTLGGDGHRAEEASKDKE
GTCAAGAGTGCCACCATGACCTCCACGGAGAGCACGGCGTCTGGAATGCAGGATGAGGTCAGAGCGGTTGGCGAGGAGCAAAGGTCAGAGGAGCCAAAGCGCAGGGTGGATACTTCAGTGTCTTGGGAGGCGTTGATTTGTGTCGGATCGTCCAAGAAGAGAGCGAGGAAGGCATCCTCTTCAGATGATGAAGGAGGGACAAGAACACTGGGAGGGGATGGCCACAGAGCGGAGGAGGCTAGCAAAGACAAAGAAG	GTCAAGAGTGCCACCATGACCTCCACGGAGAGCACGGCGTCTGGAATGCAGGATGAGGTCAGAGCGGTTGGCGAGGAGCAAAGGTCAGAGGAGCCAAAGCGCAGGGTGGATACTTCAGTGTCTTGGGAGGCGTTGATTTGTGTCGGATCGTCCAAGAAGAGAGCGAGGAAGGCATCCTCTTCAGATGATGAAGGAGGGACAAGAACACTGGGAGGGGATGGCCACAGAGCGGAGGAGGCTAGCAAAGACAAAGAAG	1	3 Base Changes	VKSATMTSTESTASGMQDEVRAVGEEQRSEEPKRRVDTSVSWEALICVGSSKKRARKASSSDDEGGTRTLGGDGHRAEEASKDKE	VKSATLSSTESTASGMQDEVRAVGEEQRSEEPKRRVDTSVSWEALICVGSSKKRARKASSSDDEGGPRTLGGDGHRAEEASKDKE
GTCAAGAGTGCCACCATGTACACCACGGAGAGCACGGCGTCTGGAATGCAGGATGAGGTCAGAGCGGTTGGCGAGGAGCAAAGGTCAGAGGAGCCAAAGCGCAGGGTGGATACTTCAGTGTCTTGGGAGGCGTTGATTTGTGTCGGATCGTCCAAGAAGAGAGCGAGGAAGGCATCCTCTTCAGATGATGAAGGAGGGCCAAGAACACTGGGAGGGGATGGCCACAGAGCGGAGGAGGCTAGCAAAGACAAAGAAG	GTCAAGAGTGCCACCATGTACACCACGGAGAGCACGGCGTCTGGAATGCAGGATGAGGTCAGAGCGGTTGGCGAGGAGCAAAGGTCAGAGGAGCCAAAGCGCAGGGTGGATACTTCAGTGTCTTGGGAGGCGTTGATTTGTGTCGGATCGTCCAAGAAGAGAGCGAGGAAGGCATCCTCTTCAGATGATGAAGGAGGGCCAAGAACACTGGGAGGGGATGGCCACAGAGCGGAGGAGGCTAGCAAAGACAAAGAAG	1	3 Base Changes	VKSATMYTTESTASGMQDEVRAVGEEQRSEEPKRRVDTSVSWEALICVGSSKKRARKASSSDDEGGPRTLGGDGHRAEEASKDKE	VKSATLSSTESTASGMQDEVRAVGEEQRSEEPKRRVDTSVSWEALICVGSSKKRARKASSSDDEGGPRTLGGDGHRAEEASKDKE
GTCAAGAGTGCCACCATGTCATCCACGGAGAGCACGGCGTCTGGAATGCAGGATGAGGTCAGAGCGGTTGGCGAGGAGCAAAGGTCAGAGGAGCCAAAGCGCAGGGTGGATACTTCAGTGTCTTGGGAGGCGTTGATTTGTGTCGGATCGTCCAAGAAGAGAGCGAGGAAGGCATCCTCTTCAGATGATGAAGGAGGGCCAAGAACACTGGGAGGGGATGGCCACAGAGCGGAGGAGGCTAGCAAAGACAAAGAAG	GTCAAGAGTGCCACCATGTCATCCACGGAGAGCACGGCGTCTGGAATGCAGGATGAGGTCAGAGCGGTTGGCGAGGAGCAAAGGTCAGAGGAGCCAAAGCGCAGGGTGGATACTTCAGTGTCTTGGGAGGCGTTGATTTGTGTCGGATCGTCCAAGAAGAGAGCGAGGAAGGCATCCTCTTCAGATGATGAAGGAGGGCCAAGAACACTGGGAGGGGATGGCCACAGAGCGGAGGAGGCTAGCAAAGACAAAGAAG	1	2 Base Changes	VKSATMSSTESTASGMQDEVRAVGEEQRSEEPKRRVDTSVSWEALICVGSSKKRARKASSSDDEGGPRTLGGDGHRAEEASKDKE	VKSATLSSTESTASGMQDEVRAVGEEQRSEEPKRRVDTSVSWEALICVGSSKKRARKASSSDDEGGPRTLGGDGHRAEEASKDKE
GTCAAGAGTGCCACCATGTCCACCACGGAGAGCACGGCGTCTGGAATGCAGGATGAGGTCAGAGCGGTTGGCGAGGAGCAAAGGTCAGAGGAGCCAAAGCGCAGGGAGGATACTTCAGTGTCTTGGGAGGCGTTGATTTGTGTCGGATCGTCCAAGACGAGAGCGAGGACGGCATCCTCTTCAGATGATGAAGGAGGGCCAAGAACACAGGGAGGGGATGGCCACAGAGCGGAGGAGGCTAGCAAAGACAAAGAAG	GTCAAGAGTGCCACCATGTCCACCACGGAGAGCACGGCGTCTGGAATGCAGGATGAGGTCAGAGCGGTTGGCGAGGAGCAAAGGTCAGAGGAGCCAAAGCGCAGGGAGGATACTTCAGTGTCTTGGGAGGCGTTGATTTGTGTCGGATCGTCCAAGACGAGAGCGAGGACGGCATCCTCTTCAGATGATGAAGGAGGGCCAAGAACACAGGGAGGGGATGGCCACAGAGCGGAGGAGGCTAGCAAAGACAAAGAAG	1	6 Base Changes	VKSATMSTTESTASGMQDEVRAVGEEQRSEEPKRREDTSVSWEALICVGSSKTRARTASSSDDEGGPRTQGGDGHRAEEASKDKE	VKSATLSSTESTASGMQDEVRAVGEEQRSEEPKRRVDTSVSWEALICVGSSKKRARKASSSDDEGGPRTLGGDGHRAEEASKDKE
GTCAAGAGTGCCACCATGTCCACCACGGAGAGCACGGCGTCTGGAATGCAGGATGAGGTCAGAGCGGTTGGCGAGGAGCAAAGGTCAGAGGAGCCAAAGCGCAGGGTGGATACTTCAGTGTATTGGGAGGCGTTGATTTGTTTCGGATCGTCCAAGAAGAGAGCGAGGAAGGCATCCTCTTAAGATGATGAAGGAGGGCCAAGAACACTGGGAGGGGATGGCCACAGAGCGGAGGAGGCTAGCAAAGACAAAGAAG	GTCAAGAGTGCCACCATGTCCACCACGGAGAGCACGGCGTCTGGAATGCAGGATGAGGTCAGAGCGGTTGGCGAGGAGCAAAGGTCAGAGGAGCCAAAGCGCAGGGTGGATACTTCAGTGTATTGGGAGGCGTTGATTTGTTTCGGATCGTCCAAGAAGAGAGCGAGGAAGGCATCCTCTTAAGATGATGAAGGAGGGCCAAGAACACTGGGAGGGGATGGCCACAGAGCGGAGGAGGCTAGCAAAGACAAAGAAG	1	5 Base Changes	VKSATMSTTESTASGMQDEVRAVGEEQRSEEPKRRVDTSVYWEALICFGSSKKRARKASS*	VKSATLSSTESTASGMQDEVRAVGEEQRSEEPKRRVDTSVSWEALICVGSSKKRARKASSSDDEGGPRTLGGDGHRAEEASKDKE
GTCAAGAGTGCCACCATGTCCACCACGGAGAGCACGGCGTCTGGAATGCAGGATGAGGTCAGAGCGGTTGGCGAGGAGCAAAGGTCAGAGGAGCCAAAGCGCAGGGTGGATACTTCAGTGTCTTGGGAGGCATTGATTTGTGTCGGATCGTCCAAGAAGAGAGCGAGGAAGGCATCCTCTTCAGATGATGAAGGAGGGCCAAGAACACTGGGAGGGGATGGCCACAGAGCGGAGGAGGCTAGCAAAGACAAAGAAG	GTCAAGAGTGCCACCATGTCCACCACGGAGAGCACGGCGTCTGGAATGCAGGATGAGGTCAGAGCGGTTGGCGAGGAGCAAAGGTCAGAGGAGCCAAAGCGCAGGGTGGATACTTCAGTGTCTTGGGAGGCATTGATTTGTGTCGGATCGTCCAAGAAGAGAGCGAGGAAGGCATCCTCTTCAGATGATGAAGGAGGGCCAAGAACACTGGGAGGGGATGGCCACAGAGCGGAGGAGGCTAGCAAAGACAAAGAAG	1	3 Base Changes	VKSATMSTTESTASGMQDEVRAVGEEQRSEEPKRRVDTSVSWEALICVGSSKKRARKASSSDDEGGPRTLGGDGHRAEEASKDKE	VKSATLSSTESTASGMQDEVRAVGEEQRSEEPKRRVDTSVSWEALICVGSSKKRARKASSSDDEGGPRTLGGDGHRAEEASKDKE
GTCAAGAGTGCCACCATGTCCACCACGGAGAGCACGGCGTCTGGAATGCAGGATGAGGTCAGAGCGGTTGGCGAGGAGCAAAGGTCAGAGGAGCCAAAGCGCAGGGTGGATACTTCAGTGTCTTGGGAGGCGTTGATTTGTGTCGGATCGTCCAAGAAGAGAGCGAGGAAGGCATCCTCTTCAGATGATGAAGGAGGGCCAAGAAAACTGGGAGGGGATGGCCACAGAGCGGAGGAGGCTAGCAAAGACAAAGAAG	GTCAAGAGTGCCACCATGTCCACCACGGAGAGCACGGCGTCTGGAATGCAGGATGAGGTCAGAGCGGTTGGCGAGGAGCAAAGGTCAGAGGAGCCAAAGCGCAGGGTGGATACTTCAGTGTCTTGGGAGGCGTTGATTTGTGTCGGATCGTCCAAGAAGAGAGCGAGGAAGGCATCCTCTTCAGATGATGAAGGAGGGCCAAGAAAACTGGGAGGGGATGGCCACAGAGCGGAGGAGGCTAGCAAAGACAAAGAAG	1	3 Base Changes	VKSATMSTTESTASGMQDEVRAVGEEQRSEEPKRRVDTSVSWEALICVGSSKKRARKASSSDDEGGPRKLGGDGHRAEEASKDKE	VKSATLSSTESTASGMQDEVRAVGEEQRSEEPKRRVDTSVSWEALICVGSSKKRARKASSSDDEGGPRTLGGDGHRAEEASKDKE
GTCAAGAGTGCCACCATGTCCACCACGGAGAGCACGGCGTCTGGAATGCAGGATGAGGTCAGAGCGGTTGGCGAGGAGCAAAGGTCAGAGGAGCCAAAGCGCAGGGTGGATACTTCAGTGTCTTGGGAGGCGTTGATTTGTGTCGGATCGTCCAAGAAGAGAGCGAGGATGGCATCCTCTTCAGATGTTGAAGGAGGGCCAAGAACACTGGGAGGGGTTGGCCACAGAGCGGAGGAGGCTAGCAAAGACAAAGAAG	GTCAAGAGTGCCACCATGTCCACCACGGAGAGCACGGCGTCTGGAATGCAGGATGAGGTCAGAGCGGTTGGCGAGGAGCAAAGGTCAGAGGAGCCAAAGCGCAGGGTGGATACTTCAGTGTCTTGGGAGGCGTTGATTTGTGTCGGATCGTCCAAGAAGAGAGCGAGGATGGCATCCTCTTCAGATGTTGAAGGAGGGCCAAGAACACTGGGAGGGGTTGGCCACAGAGCGGAGGAGGCTAGCAAAGACAAAGAAG	1	5 Base Changes	VKSATMSTTESTASGMQDEVRAVGEEQRSEEPKRRVDTSVSWEALICVGSSKKRARMASSSDVEGGPRTLGGVGHRAEEASKDKE	VKSATLSSTESTASGMQDEVRAVGEEQRSEEPKRRVDTSVSWEALICVGSSKKRARKASSSDDEGGPRTLGGDGHRAEEASKDKE
GTCAAGAGTGCCACCATGTCCACCACGGAGAGCACGGCGTCTGGAATGCAGGATGATGTCAGAGCGGTTGGCGAGGAGCAAAGGTCAGAGGAGCCAAAGCGCAGGGTGGATACTTCAGTGTCTTGGGAGGCGTTGATTTGTGTCGGATCGTCCAAGAAGAGAGAGAGGAAGGCATCCTCTTCAGATGATGAAGGAGGGCCAAGAACACTGGGAGGGGATGGCCACAGAGCGGAGGAGGCTAGCAAAGACAAAGAAG	GTCAAGAGTGCCACCATGTCCACCACGGAGAGCACGGCGTCTGGAATGCAGGATGATGTCAGAGCGGTTGGCGAGGAGCAAAGGTCAGAGGAGCCAAAGCGCAGGGTGGATACTTCAGTGTCTTGGGAGGCGTTGATTTGTGTCGGATCGTCCAAGAAGAGAGAGAGGAAGGCATCCTCTTCAGATGATGAAGGAGGGCCAAGAACACTGGGAGGGGATGGCCACAGAGCGGAGGAGGCTAGCAAAGACAAAGAAG	1	4 Base Changes	VKSATMSTTESTASGMQDDVRAVGEEQRSEEPKRRVDTSVSWEALICVGSSKKRERKASSSDDEGGPRTLGGDGHRAEEASKDKE	VKSATLSSTESTASGMQDEVRAVGEEQRSEEPKRRVDTSVSWEALICVGSSKKRARKASSSDDEGGPRTLGGDGHRAEEASKDKE
GTCAAGAGTGCCACCATGTCCACCACGGAGGGCACGGCGTCTGGAATGCAGGATGAGGTCAGAGCGGTTGGCGAGGAGCAAAGGTCAGAGGAGCCAAAGCGCAGGGTGGATACTTCAGTGTCTTGGGAGGCGTTGATTTGTGTCGGATCGTCCAAGAAGAGAGCGAGGAAGGCATCCTCTTCAGATGATGAAGGAGGGCCAAGAACACTGGGAGGGGATGGCCACAGAGCGGAGGAGGCTAGCAAAGACAAAGAAG	GTCAAGAGTGCCACCATGTCCACCACGGAGGGCACGGCGTCTGGAATGCAGGATGAGGTCAGAGCGGTTGGCGAGGAGCAAAGGTCAGAGGAGCCAAAGCGCAGGGTGGATACTTCAGTGTCTTGGGAGGCGTTGATTTGTGTCGGATCGTCCAAGAAGAGAGCGAGGAAGGCATCCTCTTCAGATGATGAAGGAGGGCCAAGAACACTGGGAGGGGATGGCCACAGAGCGGAGGAGGCTAGCAAAGACAAAGAAG	1	3 Base Changes	VKSATMSTTEGTASGMQDEVRAVGEEQRSEEPKRRVDTSVSWEALICVGSSKKRARKASSSDDEGGPRTLGGDGHRAEEASKDKE	VKSATLSSTESTASGMQDEVRAVGEEQRSEEPKRRVDTSVSWEALICVGSSKKRARKASSSDDEGGPRTLGGDGHRAEEASKDKE
GTCAAGAGTGCCACCATGTCCACCACGGATAGCACGGCGTCTGGAATGCAGGATGAGGTCAGAGCGGTTGGCGAGGAGCAAAGGTCAGAGGAGCCAAAGCGCAGGGTGGATACTTCAGTGTCTTGGGAGGCGTTGATTTGTGTCGGATCGTCCAAGAAGAGAGCGAGGAAGGCATCCTCTTCAGATGATGAAGGAGGGCCAAGAACACTGGGAGGGGATGGCCACAGAGCGGAGGAGGCTAGCAAAGACAAAGAAG	GTCAAGAGTGCCACCATGTCCACCACGGATAGCACGGCGTCTGGAATGCAGGATGAGGTCAGAGCGGTTGGCGAGGAGCAAAGGTCAGAGGAGCCAAAGCGCAGGGTGGATACTTCAGTGTCTTGGGAGGCGTTGATTTGTGTCGGATCGTCCAAGAAGAGAGCGAGGAAGGCATCCTCTTCAGATGATGAAGGAGGGCCAAGAACACTGGGAGGGGATGGCCACAGAGCGGAGGAGGCTAGCAAAGACAAAGAAG	1	3 Base Changes	VKSATMSTTDSTASGMQDEVRAVGEEQRSEEPKRRVDTSVSWEALICVGSSKKRARKASSSDDEGGPRTLGGDGHRAEEASKDKE	VKSATLSSTESTASGMQDEVRAVGEEQRSEEPKRRVDTSVSWEALICVGSSKKRARKASSSDDEGGPRTLGGDGHRAEEASKDKE
GTCAAGAGTGCCACCATGTCCTCAACGGAGAGAGCGGCGTCTGGAATGCAGGATGAGGTCAGAGCGGTTGGCGAGGAGAAAAGGTCAGAGGAGCCAAAGCGCAGGGTGGATACTTCAGTGTCTTGGGAGGCGTTGATTTGTGTCGGATCGTCAAAGAAGAGAGCGAGGAAGGCATCCTCTTCAGATGATGAAGGAGGGCCAAGAACACTGGGAGGGGATGGCCACAGAGCGGAGGAGGCTAGCAAAGACAAAGAAG	GTCAAGAGTGCCACCATGTCCTCAACGGAGAGAGCGGCGTCTGGAATGCAGGATGAGGTCAGAGCGGTTGGCGAGGAGAAAAGGTCAGAGGAGCCAAAGCGCAGGGTGGATACTTCAGTGTCTTGGGAGGCGTTGATTTGTGTCGGATCGTCAAAGAAGAGAGCGAGGAAGGCATCCTCTTCAGATGATGAAGGAGGGCCAAGAACACTGGGAGGGGATGGCCACAGAGCGGAGGAGGCTAGCAAAGACAAAGAAG	1	6 Base Changes	VKSATMSSTERAASGMQDEVRAVGEEKRSEEPKRRVDTSVSWEALICVGSSKKRARKASSSDDEGGPRTLGGDGHRAEEASKDKE	VKSATLSSTESTASGMQDEVRAVGEEQRSEEPKRRVDTSVSWEALICVGSSKKRARKASSSDDEGGPRTLGGDGHRAEEASKDKE
GTCAAGAGTGCCACCATGTCCTCCACCGAGAGCACGGCGTCTGGAATGCAGGATGAGGGCAGAGCGGTTGGCGAGGAGCAAAGGTCAGAGGAGCCAAAGCGCAGGGTGGATACTTCAGTGTCTTGGGAGGCGTTGAGTTGTGTCGGATCGTCCAAGAAGAGAGCGATGAAGGCATCCTCTTCAGATGATGAAGGAGGGCCAAGAACACTGGGAGGGGCTGGCCACACAGCGGAGTAGGCTAGCAAAGACAAAGAAG	GTCAAGAGTGCCACCATGTCCTCCACCGAGAGCACGGCGTCTGGAATGCAGGATGAGGGCAGAGCGGTTGGCGAGGAGCAAAGGTCAGAGGAGCCAAAGCGCAGGGTGGATACTTCAGTGTCTTGGGAGGCGTTGAGTTGTGTCGGATCGTCCAAGAAGAGAGCGATGAAGGCATCCTCTTCAGATGATGAAGGAGGGCCAAGAACACTGGGAGGGGCTGGCCACACAGCGGAGTAGGCTAGCAAAGACAAAGAAG	1	8 Base Changes	VKSATMSSTESTASGMQDEGRAVGEEQRSEEPKRRVDTSVSWEALSCVGSSKKRAMKASSSDDEGGPRTLGGAGHTAE*	VKSATLSSTESTASGMQDEVRAVGEEQRSEEPKRRVDTSVSWEALICVGSSKKRARKASSSDDEGGPRTLGGDGHRAEEASKDKE
GTCAAGAGTGCCACCATGTCCTCCACGGAGAACACGGCGTCTGGAATGCAGGATGAGGTCAGAGCGGTTGGCGAGGAGCAAAGGTCAGAGGAGCCAAAGCGCAGGGTGGATACTTCAGTGTCTTGGGAGGCGTTGATTTGTGTCGGATCGTCCAAGAAGAGAGCGAGGAAGGCATCCTCTTCAGATGATGAAGGAGGGCCAAGAACACTGGGAGGGGATGGCCACAGAGCGGAGGAGGCTAGCAAAGACAAAGAAG	GTCAAGAGTGCCACCATGTCCTCCACGGAGAACACGGCGTCTGGAATGCAGGATGAGGTCAGAGCGGTTGGCGAGGAGCAAAGGTCAGAGGAGCCAAAGCGCAGGGTGGATACTTCAGTGTCTTGGGAGGCGTTGATTTGTGTCGGATCGTCCAAGAAGAGAGCGAGGAAGGCATCCTCTTCAGATGATGAAGGAGGGCCAAGAACACTGGGAGGGGATGGCCACAGAGCGGAGGAGGCTAGCAAAGACAAAGAAG	1	2 Base Changes	VKSATMSSTENTASGMQDEVRAVGEEQRSEEPKRRVDTSVSWEALICVGSSKKRARKASSSDDEGGPRTLGGDGHRAEEASKDKE	VKSATLSSTESTASGMQDEVRAVGEEQRSEEPKRRVDTSVSWEALICVGSSKKRARKASSSDDEGGPRTLGGDGHRAEEASKDKE
GTCAAGAGTGCCACCATGTCCTCCACGGAGAGCACGGCGTCTGGAAAGCAGGATGAGGTCAGAGCGGTTGGCGAGGAGCAAAGGTCAGAGGAGCCAAAGCGCAGGGTGGATACTTCAGTGTCTTGGGAGGCGTTGATTTGTGTCGGATCGTCCAAGAAGAGAGCGAGGAAGGCATCCTCTTCAGATGATGAAGGAGGGCCAAGAACACTGGGAGGGGATGGCCACAGAGCGGAGGAGGCTAGCAAAGACAAAGAAG	GTCAAGAGTGCCACCATGTCCTCCACGGAGAGCACGGCGTCTGGAAAGCAGGATGAGGTCAGAGCGGTTGGCGAGGAGCAAAGGTCAGAGGAGCCAAAGCGCAGGGTGGATACTTCAGTGTCTTGGGAGGCGTTGATTTGTGTCGGATCGTCCAAGAAGAGAGCGAGGAAGGCATCCTCTTCAGATGATGAAGGAGGGCCAAGAACACTGGGAGGGGATGGCCACAGAGCGGAGGAGGCTAGCAAAGACAAAGAAG	1	2 Base Changes	VKSATMSSTESTASGKQDEVRAVGEEQRSEEPKRRVDTSVSWEALICVGSSKKRARKASSSDDEGGPRTLGGDGHRAEEASKDKE	VKSATLSSTESTASGMQDEVRAVGEEQRSEEPKRRVDTSVSWEALICVGSSKKRARKASSSDDEGGPRTLGGDGHRAEEASKDKE
GTCAAGAGTGCCACCATGTCCTCCACGGAGAGCACGGCGTCTGGAATGCAGGATGAGGCCAGAGCGGTTGGCGAGGAGCAAAGGTCAGAGGAGCCAAAGCGCAGGGTGGATACTTCAGTGTCTTGGGAGGCGTTGATTTGTGTCGGATCGTCCAAGAAGAGAGCGAGGAAGGCATCCTCGTCAGATGATGAAGGAGGGCCAAGAACACTGGGAGGGGATGGCCACAGAGCGGAGGAGGCTAGCAAAGACAAAGAAG	GTCAAGAGTGCCACCATGTCCTCCACGGAGAGCACGGCGTCTGGAATGCAGGATGAGGCCAGAGCGGTTGGCGAGGAGCAAAGGTCAGAGGAGCCAAAGCGCAGGGTGGATACTTCAGTGTCTTGGGAGGCGTTGATTTGTGTCGGATCGTCCAAGAAGAGAGCGAGGAAGGCATCCTCGTCAGATGATGAAGGAGGGCCAAGAACACTGGGAGGGGATGGCCACAGAGCGGAGGAGGCTAGCAAAGACAAAGAAG	1	3 Base Changes	VKSATMSSTESTASGMQDEARAVGEEQRSEEPKRRVDTSVSWEALICVGSSKKRARKASSSDDEGGPRTLGGDGHRAEEASKDKE	VKSATLSSTESTASGMQDEVRAVGEEQRSEEPKRRVDTSVSWEALICVGSSKKRARKASSSDDEGGPRTLGGDGHRAEEASKDKE
GTCAAGAGTGCCACCATGTCCTCCACGGAGAGCACGGCGTCTGGAATGCAGGATGAGGTCAGAGCGGTTGGCGAGGAGCAAAGGACAGAGGAGCCAATGCGCAGGGTGGATACTTCAGTGTCTTGGGAGGCGTTGATTTGTGTCGGATCGTCGAAGAAGAGAGCGAGGAAGGCATCCTCTTCAGATGATGAAGGAGGGCCAAGAACACTGGGAGGGGATGGCCACAGAGCGGAGGAGGCTAGCAAAGACAAAGAAG	GTCAAGAGTGCCACCATGTCCTCCACGGAGAGCACGGCGTCTGGAATGCAGGATGAGGTCAGAGCGGTTGGCGAGGAGCAAAGGACAGAGGAGCCAATGCGCAGGGTGGATACTTCAGTGTCTTGGGAGGCGTTGATTTGTGTCGGATCGTCGAAGAAGAGAGCGAGGAAGGCATCCTCTTCAGATGATGAAGGAGGGCCAAGAACACTGGGAGGGGATGGCCACAGAGCGGAGGAGGCTAGCAAAGACAAAGAAG	1	4 Base Changes	VKSATMSSTESTASGMQDEVRAVGEEQRTEEPMRRVDTSVSWEALICVGSSKKRARKASSSDDEGGPRTLGGDGHRAEEASKDKE	VKSATLSSTESTASGMQDEVRAVGEEQRSEEPKRRVDTSVSWEALICVGSSKKRARKASSSDDEGGPRTLGGDGHRAEEASKDKE
GTCAAGAGTGCCACCATGTCCTCCACGGAGAGCACGGCGTCTGGAATGCAGGATGAGGTCAGAGCGGTTGGCGAGGAGCAAAGGTAAGAGGAGCCAAAGCGCAGGGTGGATACTTCAGTGTCTTGGGAGGCGTTGATTTGTGTCGGATCGTCCAAGAAGAGAGCGAGGAAGGCATCCTCTTCAGATGATGAAGGAGGGCCAAGAACACTGGGAGGGGATGGCCACAGAGCGGAGGAGGCTAGCAAAGACAAAGAAG	GTCAAGAGTGCCACCATGTCCTCCACGGAGAGCACGGCGTCTGGAATGCAGGATGAGGTCAGAGCGGTTGGCGAGGAGCAAAGGTAAGAGGAGCCAAAGCGCAGGGTGGATACTTCAGTGTCTTGGGAGGCGTTGATTTGTGTCGGATCGTCCAAGAAGAGAGCGAGGAAGGCATCCTCTTCAGATGATGAAGGAGGGCCAAGAACACTGGGAGGGGATGGCCACAGAGCGGAGGAGGCTAGCAAAGACAAAGAAG	1	2 Base Changes	VKSATMSSTESTASGMQDEVRAVGEEQR*	VKSATLSSTESTASGMQDEVRAVGEEQRSEEPKRRVDTSVSWEALICVGSSKKRARKASSSDDEGGPRTLGGDGHRAEEASKDKE
GTCAAGAGTGCCACCATGTCCTCCACGGAGAGCACGGCGTCTGGAATGCAGGATGAGGTCAGAGCGGTTGGCGAGGAGCAAAGGTCAGAGGAGCCAAAGAGCAGGGTGGATACTTCAGTGTCTTGGGAGGCGTTGATTTGTGTCGGATCGTCCAAGAAGAGAGCGAGGAAGGCATCCTCTTCAGATGATGAAGGAGGGCCAAGAACACTGGGAGGGGATGGCCACAGAGCGGAGGAGGCTAGCAAAGACAAAGAAG	GTCAAGAGTGCCACCATGTCCTCCACGGAGAGCACGGCGTCTGGAATGCAGGATGAGGTCAGAGCGGTTGGCGAGGAGCAAAGGTCAGAGGAGCCAAAGAGCAGGGTGGATACTTCAGTGTCTTGGGAGGCGTTGATTTGTGTCGGATCGTCCAAGAAGAGAGCGAGGAAGGCATCCTCTTCAGATGATGAAGGAGGGCCAAGAACACTGGGAGGGGATGGCCACAGAGCGGAGGAGGCTAGCAAAGACAAAGAAG	1	2 Base Changes	VKSATMSSTESTASGMQDEVRAVGEEQRSEEPKSRVDTSVSWEALICVGSSKKRARKASSSDDEGGPRTLGGDGHRAEEASKDKE	VKSATLSSTESTASGMQDEVRAVGEEQRSEEPKRRVDTSVSWEALICVGSSKKRARKASSSDDEGGPRTLGGDGHRAEEASKDKE
GTCAAGAGTGCCACCATGTCCTCCACGGAGAGCACGGCGTCTGGAATGCAGGATGAGGTCAGAGCGGTTGGCGAGGAGCAAAGGTCAGAGGAGCCAAAGCGCAGGGTGGATACGTCATTGTCTTGGGAGGCGTTGATTTGTGTCGGATCGTCCAAGAAGAGAGCGAGGAAGGCATCCTCTTCAGATGATGAAGGAGGGACAAGAACACTGGGAGGGGATGTCCACAGAGCGGAGGAGGCTAGCAAAGACAAAGAAG	GTCAAGAGTGCCACCATGTCCTCCACGGAGAGCACGGCGTCTGGAATGCAGGATGAGGTCAGAGCGGTTGGCGAGGAGCAAAGGTCAGAGGAGCCAAAGCGCAGGGTGGATACGTCATTGTCTTGGGAGGCGTTGATTTGTGTCGGATCGTCCAAGAAGAGAGCGAGGAAGGCATCCTCTTCAGATGATGAAGGAGGGACAAGAACACTGGGAGGGGATGTCCACAGAGCGGAGGAGGCTAGCAAAGACAAAGAAG	1	5 Base Changes	VKSATMSSTESTASGMQDEVRAVGEEQRSEEPKRRVDTSLSWEALICVGSSKKRARKASSSDDEGGTRTLGGDVHRAEEASKDKE	VKSATLSSTESTASGMQDEVRAVGEEQRSEEPKRRVDTSVSWEALICVGSSKKRARKASSSDDEGGPRTLGGDGHRAEEASKDKE
GTCAAGAGTGCCACCATGTCCTCCACGGAGAGCACGGCGTCTGGAATGCAGGATGAGGTCAGAGCGGTTGGCGAGGAGCAAAGGTCAGAGGAGCCAAAGCGCAGGGTGGATACTCCAGTGTCTTGGGAGGCGTTGATTTGTGTCGGATCGTCCAAGAAGAGAGCGAGGAAGGCATCCTCTTCAGATGATGAAGGAGGGCCAAGAACACTGGGAGGGGATGGCCACAGAGCGGAGGAGGCTAGCAAAGACAAAGAAG	GTCAAGAGTGCCACCATGTCCTCCACGGAGAGCACGGCGTCTGGAATGCAGGATGAGGTCAGAGCGGTTGGCGAGGAGCAAAGGTCAGAGGAGCCAAAGCGCAGGGTGGATACTCCAGTGTCTTGGGAGGCGTTGATTTGTGTCGGATCGTCCAAGAAGAGAGCGAGGAAGGCATCCTCTTCAGATGATGAAGGAGGGCCAAGAACACTGGGAGGGGATGGCCACAGAGCGGAGGAGGCTAGCAAAGACAAAGAAG	1	2 Base Changes	VKSATMSSTESTASGMQDEVRAVGEEQRSEEPKRRVDTPVSWEALICVGSSKKRARKASSSDDEGGPRTLGGDGHRAEEASKDKE	VKSATLSSTESTASGMQDEVRAVGEEQRSEEPKRRVDTSVSWEALICVGSSKKRARKASSSDDEGGPRTLGGDGHRAEEASKDKE
GTCAAGAGTGCCACCATGTCCTCCACGGAGAGCACGGCGTCTGGAATGCAGGATGAGGTCAGAGCGGTTGGCGAGGAGCAAAGGTCAGAGGAGCCAAAGCGCAGGGTGGATACTGCAGTGTCTTGGGAGGCGTTGATTTGTGTCGGATCGTCCAAGAAGAGAGCGAGGAAGGCATCCTCTTCAGATGATGAAGGAGGGCCAAGAACACTGGGAGGGGATGGCCACAGAGCGGAGGGGGCTAGCAAAGACAAAGAAG	GTCAAGAGTGCCACCATGTCCTCCACGGAGAGCACGGCGTCTGGAATGCAGGATGAGGTCAGAGCGGTTGGCGAGGAGCAAAGGTCAGAGGAGCCAAAGCGCAGGGTGGATACTGCAGTGTCTTGGGAGGCGTTGATTTGTGTCGGATCGTCCAAGAAGAGAGCGAGGAAGGCATCCTCTTCAGATGATGAAGGAGGGCCAAGAACACTGGGAGGGGATGGCCACAGAGCGGAGGGGGCTAGCAAAGACAAAGAAG	1	3 Base Changes	VKSATMSSTESTASGMQDEVRAVGEEQRSEEPKRRVDTAVSWEALICVGSSKKRARKASSSDDEGGPRTLGGDGHRAEGASKDKE	VKSATLSSTESTASGMQDEVRAVGEEQRSEEPKRRVDTSVSWEALICVGSSKKRARKASSSDDEGGPRTLGGDGHRAEEASKDKE
GTCAAGAGTGCCACCATGTCCTCCACGGAGAGCACGGCGTCTGGAATGCAGGATGAGGTCAGAGCGGTTGGCGAGGAGCAAAGGTCAGAGGAGCCAAAGCGCAGGGTGGATACTTAAGTGTCTTGTGAGGCGTTGATTTGTGTAGGATCGTCCAAGAAGAGAGCGAGGAAGGCATCCTCTTCAGATGATGAAGGAGGGCCAAGAACACTGGGAGGGGATGGCCACAGAGCGGAGGAGGCTAGCAAAGACAAAGAAG	GTCAAGAGTGCCACCATGTCCTCCACGGAGAGCACGGCGTCTGGAATGCAGGATGAGGTCAGAGCGGTTGGCGAGGAGCAAAGGTCAGAGGAGCCAAAGCGCAGGGTGGATACTTAAGTGTCTTGTGAGGCGTTGATTTGTGTAGGATCGTCCAAGAAGAGAGCGAGGAAGGCATCCTCTTCAGATGATGAAGGAGGGCCAAGAACACTGGGAGGGGATGGCCACAGAGCGGAGGAGGCTAGCAAAGACAAAGAAG	1	4 Base Changes	VKSATMSSTESTASGMQDEVRAVGEEQRSEEPKRRVDT*	VKSATLSSTESTASGMQDEVRAVGEEQRSEEPKRRVDTSVSWEALICVGSSKKRARKASSSDDEGGPRTLGGDGHRAEEASKDKE
GTCAAGAGTGCCACCATGTCCTCCACGGAGAGCACGGCGTCTGGAATGCAGGATGAGGTCAGAGCGGTTGGCGAGGAGCAAAGGTCAGAGGAGCCAAAGCGCAGGGTGGATACTTCAGTGTCATGGGAGGCGTTGATTTGTGTCGGATCGTCCAAGAAGAGAGCGAGGAAGGCATCCTCTTCAGATGATGAAGGAGGGCCAAGAACACTGGGAGGGGATGGCCACAGAGCGGAGGAGGCTAGCAAAGACAAAGAAG	GTCAAGAGTGCCACCATGTCCTCCACGGAGAGCACGGCGTCTGGAATGCAGGATGAGGTCAGAGCGGTTGGCGAGGAGCAAAGGTCAGAGGAGCCAAAGCGCAGGGTGGATACTTCAGTGTCATGGGAGGCGTTGATTTGTGTCGGATCGTCCAAGAAGAGAGCGAGGAAGGCATCCTCTTCAGATGATGAAGGAGGGCCAAGAACACTGGGAGGGGATGGCCACAGAGCGGAGGAGGCTAGCAAAGACAAAGAAG	1	2 Base Changes	VKSATMSSTESTASGMQDEVRAVGEEQRSEEPKRRVDTSVSWEALICVGSSKKRARKASSSDDEGGPRTLGGDGHRAEEASKDKE	VKSATLSSTESTASGMQDEVRAVGEEQRSEEPKRRVDTSVSWEALICVGSSKKRARKASSSDDEGGPRTLGGDGHRAEEASKDKE
GTCAAGAGTGCCACCATGTCCTCCACGGAGAGCACGGCGTCTGGAATGCAGGATGAGGTCAGAGCGGTTGGCGAGGAGCAAAGGTCAGAGGAGCCAAAGCGCAGGGTGGATACTTCAGTGTCTTGGGAGGCGTTGACTTGTGTCGGATCGTCCAAGAAGAGAGCGAGGAAGGCATCCTCTTCAGATGATGAAGGAGGGCCAAGAACACTGGGAGGGGATGGCCACAGAGCGGAGGAGGCTAGCAAAGACAAAGAAG	GTCAAGAGTGCCACCATGTCCTCCACGGAGAGCACGGCGTCTGGAATGCAGGATGAGGTCAGAGCGGTTGGCGAGGAGCAAAGGTCAGAGGAGCCAAAGCGCAGGGTGGATACTTCAGTGTCTTGGGAGGCGTTGACTTGTGTCGGATCGTCCAAGAAGAGAGCGAGGAAGGCATCCTCTTCAGATGATGAAGGAGGGCCAAGAACACTGGGAGGGGATGGCCACAGAGCGGAGGAGGCTAGCAAAGACAAAGAAG	1	2 Base Changes	VKSATMSSTESTASGMQDEVRAVGEEQRSEEPKRRVDTSVSWEALTCVGSSKKRARKASSSDDEGGPRTLGGDGHRAEEASKDKE	VKSATLSSTESTASGMQDEVRAVGEEQRSEEPKRRVDTSVSWEALICVGSSKKRARKASSSDDEGGPRTLGGDGHRAEEASKDKE
GTCAAGAGTGCCACCATGTCCTCCACGGAGAGCACGGCGTCTGGAATGCAGGATGAGGTCAGAGCGGTTGGCGAGGAGCAAAGGTCAGAGGAGCCAAAGCGCAGGGTGGATACTTCAGTGTCTTGGGAGGCGTTGATTTGCGTCGGATCGTCCAAGAAGAGAGCGAGGAAGGCATCCTCTTCAGATGATGAAGGAGGGCCAAGAACACTGGGAGGGGATGGCCACAGAGCGGAGGAGGCTAGCAAAGACAAAGAAG	GTCAAGAGTGCCACCATGTCCTCCACGGAGAGCACGGCGTCTGGAATGCAGGATGAGGTCAGAGCGGTTGGCGAGGAGCAAAGGTCAGAGGAGCCAAAGCGCAGGGTGGATACTTCAGTGTCTTGGGAGGCGTTGATTTGCGTCGGATCGTCCAAGAAGAGAGCGAGGAAGGCATCCTCTTCAGATGATGAAGGAGGGCCAAGAACACTGGGAGGGGATGGCCACAGAGCGGAGGAGGCTAGCAAAGACAAAGAAG	1	2 Base Changes	VKSATMSSTESTASGMQDEVRAVGEEQRSEEPKRRVDTSVSWEALICVGSSKKRARKASSSDDEGGPRTLGGDGHRAEEASKDKE	VKSATLSSTESTASGMQDEVRAVGEEQRSEEPKRRVDTSVSWEALICVGSSKKRARKASSSDDEGGPRTLGGDGHRAEEASKDKE
GTCAAGAGTGCCACCATGTCCTCCACGGAGAGCACGGCGTCTGGAATGCAGGATGAGGTCAGAGCGGTTGGCGAGGAGCAAAGGTCAGAGGAGCCAAAGCGCAGGGTGGATACTTCAGTGTCTTGGGAGGCGTTGATTTGTGTCGGATCGCCCAAGAAGAGAGCGAGGAAGGCATCCTCTTCAGATGATGAAGGAGGGCCAAGAACACTGGGAGGGGATGGCCACAGAGCGGAGGAGGCTAGCAAAGACAAAGAAG	GTCAAGAGTGCCACCATGTCCTCCACGGAGAGCACGGCGTCTGGAATGCAGGATGAGGTCAGAGCGGTTGGCGAGGAGCAAAGGTCAGAGGAGCCAAAGCGCAGGGTGGATACTTCAGTGTCTTGGGAGGCGTTGATTTGTGTCGGATCGCCCAAGAAGAGAGCGAGGAAGGCATCCTCTTCAGATGATGAAGGAGGGCCAAGAACACTGGGAGGGGATGGCCACAGAGCGGAGGAGGCTAGCAAAGACAAAGAAG	1	2 Base Changes	VKSATMSSTESTASGMQDEVRAVGEEQRSEEPKRRVDTSVSWEALICVGSPKKRARKASSSDDEGGPRTLGGDGHRAEEASKDKE	VKSATLSSTESTASGMQDEVRAVGEEQRSEEPKRRVDTSVSWEALICVGSSKKRARKASSSDDEGGPRTLGGDGHRAEEASKDKE
GTCAAGAGTGCCACCATGTCCTCCACGGAGAGCACGGCGTCTGGAATGCAGGATGAGGTCAGAGCGGTTGGCGAGGAGCAAAGGTCAGAGGAGCCAAAGCGCAGGGTGGATACTTCAGTGTCTTGGGAGGCGTTGATTTGTGTCGGATCGTCCAAGAAGAGAGAGAGGAAGGCATCCTCTTCAGATGATGAAGGAGGGCCAAGAACACTGGGAGGGGATGGCCACAGAGCGGAGGAGGCTAGCAAAGACAAAGAAG	GTCAAGAGTGCCACCATGTCCTCCACGGAGAGCACGGCGTCTGGAATGCAGGATGAGGTCAGAGCGGTTGGCGAGGAGCAAAGGTCAGAGGAGCCAAAGCGCAGGGTGGATACTTCAGTGTCTTGGGAGGCGTTGATTTGTGTCGGATCGTCCAAGAAGAGAGAGAGGAAGGCATCCTCTTCAGATGATGAAGGAGGGCCAAGAACACTGGGAGGGGATGGCCACAGAGCGGAGGAGGCTAGCAAAGACAAAGAAG	1	2 Base Changes	VKSATMSSTESTASGMQDEVRAVGEEQRSEEPKRRVDTSVSWEALICVGSSKKRERKASSSDDEGGPRTLGGDGHRAEEASKDKE	VKSATLSSTESTASGMQDEVRAVGEEQRSEEPKRRVDTSVSWEALICVGSSKKRARKASSSDDEGGPRTLGGDGHRAEEASKDKE
GTCAAGAGTGCCACCATGTCCTCCACGGAGAGCACGGCGTCTGGAATGCAGGATGAGGTCAGAGCGGTTGGCGAGGAGCAAAGGTCAGAGGAGCCAAAGCGCAGGGTGGATACTTCAGTGTCTTGGGAGGCGTTGATTTGTGTCGGATCGTCCAAGAAGAGAGCGAGGAACGCATCATCTTCAGATGATGAAGGAGGGCCAAGAACACTGGGAGGGGATGGCCACAGAGCGGAGGAGGCTAGCAAAGACAAAGAAG	GTCAAGAGTGCCACCATGTCCTCCACGGAGAGCACGGCGTCTGGAATGCAGGATGAGGTCAGAGCGGTTGGCGAGGAGCAAAGGTCAGAGGAGCCAAAGCGCAGGGTGGATACTTCAGTGTCTTGGGAGGCGTTGATTTGTGTCGGATCGTCCAAGAAGAGAGCGAGGAACGCATCATCTTCAGATGATGAAGGAGGGCCAAGAACACTGGGAGGGGATGGCCACAGAGCGGAGGAGGCTAGCAAAGACAAAGAAG	1	3 Base Changes	VKSATMSSTESTASGMQDEVRAVGEEQRSEEPKRRVDTSVSWEALICVGSSKKRARNASSSDDEGGPRTLGGDGHRAEEASKDKE	VKSATLSSTESTASGMQDEVRAVGEEQRSEEPKRRVDTSVSWEALICVGSSKKRARKASSSDDEGGPRTLGGDGHRAEEASKDKE
GTCAAGAGTGCCACCATGTCCTCCACGGAGAGCACGGCGTCTGGAATGCAGGATGAGGTCAGAGCGGTTGGCGAGGAGCAAAGGTCAGAGGAGCCAAAGCGCAGGGTGGATACTTCAGTGTCTTGGGAGGCGTTGATTTGTGTCGGATCGTCCAAGAAGAGAGCGAGGAAGGCACCCTCTTCAGATGATGAAGGAGGGCCAAGAACACTGGGAGGGGATGGCCACAGAGCGGAGGAGGCTAGCAAAGACAAAGAAG	GTCAAGAGTGCCACCATGTCCTCCACGGAGAGCACGGCGTCTGGAATGCAGGATGAGGTCAGAGCGGTTGGCGAGGAGCAAAGGTCAGAGGAGCCAAAGCGCAGGGTGGATACTTCAGTGTCTTGGGAGGCGTTGATTTGTGTCGGATCGTCCAAGAAGAGAGCGAGGAAGGCACCCTCTTCAGATGATGAAGGAGGGCCAAGAACACTGGGAGGGGATGGCCACAGAGCGGAGGAGGCTAGCAAAGACAAAGAAG	1	2 Base Changes	VKSATMSSTESTASGMQDEVRAVGEEQRSEEPKRRVDTSVSWEALICVGSSKKRARKAPSSDDEGGPRTLGGDGHRAEEASKDKE	VKSATLSSTESTASGMQDEVRAVGEEQRSEEPKRRVDTSVSWEALICVGSSKKRARKASSSDDEGGPRTLGGDGHRAEEASKDKE
GTCAAGAGTGCCACCATGTCCTCCACGGAGAGCACGGCGTCTGGAATGCAGGATGAGGTCAGAGCGGTTGGCGAGGAGCAAAGGTCAGAGGAGCCAAAGCGCAGGGTGGATACTTCAGTGTCTTGGGAGGCGTTGATTTGTGTCGGATCGTCCAAGAAGAGAGCGAGGAAGGCATCCTCTTCAGACGATGAAGGAGGGCCAAGAACACTGGGAGGGGATGGCCACAGAGCGGAGGAGGCTAGCAAAGACAAAGAAG	GTCAAGAGTGCCACCATGTCCTCCACGGAGAGCACGGCGTCTGGAATGCAGGATGAGGTCAGAGCGGTTGGCGAGGAGCAAAGGTCAGAGGAGCCAAAGCGCAGGGTGGATACTTCAGTGTCTTGGGAGGCGTTGATTTGTGTCGGATCGTCCAAGAAGAGAGCGAGGAAGGCATCCTCTTCAGACGATGAAGGAGGGCCAAGAACACTGGGAGGGGATGGCCACAGAGCGGAGGAGGCTAGCAAAGACAAAGAAG	1	2 Base Changes	VKSATMSSTESTASGMQDEVRAVGEEQRSEEPKRRVDTSVSWEALICVGSSKKRARKASSSDDEGGPRTLGGDGHRAEEASKDKE	VKSATLSSTESTASGMQDEVRAVGEEQRSEEPKRRVDTSVSWEALICVGSSKKRARKASSSDDEGGPRTLGGDGHRAEEASKDKE
GTCAAGAGTGCCACCATGTCCTCCACGGAGAGCACGGCGTCTGGAATGCAGGATGAGGTCAGAGCGGTTGGCGAGGAGCAAAGGTCAGAGGAGCCAAAGCGCAGGGTGGATACTTCAGTGTCTTGGGAGGCGTTGATTTGTGTCGGATCGTCCAAGAAGAGAGCGAGGAAGGCATCCTCTTCAGATGATGAAGGAGGACCAAGAACACTGGGAGGGGATGGCCACAGAGCGGAGGAGGCTAGCAAAGACAAAGAAG	GTCAAGAGTGCCACCATGTCCTCCACGGAGAGCACGGCGTCTGGAATGCAGGATGAGGTCAGAGCGGTTGGCGAGGAGCAAAGGTCAGAGGAGCCAAAGCGCAGGGTGGATACTTCAGTGTCTTGGGAGGCGTTGATTTGTGTCGGATCGTCCAAGAAGAGAGCGAGGAAGGCATCCTCTTCAGATGATGAAGGAGGACCAAGAACACTGGGAGGGGATGGCCACAGAGCGGAGGAGGCTAGCAAAGACAAAGAAG	1	2 Base Changes	VKSATMSSTESTASGMQDEVRAVGEEQRSEEPKRRVDTSVSWEALICVGSSKKRARKASSSDDEGGPRTLGGDGHRAEEASKDKE	VKSATLSSTESTASGMQDEVRAVGEEQRSEEPKRRVDTSVSWEALICVGSSKKRARKASSSDDEGGPRTLGGDGHRAEEASKDKE
GTCAAGAGTGCCACCATGTCCTCCACGGAGAGCACGGCGTCTGGAATGCAGGATGAGGTCAGAGCGGTTGGCGAGGAGCAAAGGTCAGAGGAGCCAAAGCGCAGGGTGGATACTTCAGTGTCTTGGGAGGCGTTGATTTGTGTCGGATCGTCCAAGAAGAGAGCGAGGAAGGCATCCTCTTCAGATGATGAAGGAGGGCCAAGAACACTGGAAGGGGATGGCCACAGAGCGGAGGAGGCTAGCAAAGACAAAGAAG	GTCAAGAGTGCCACCATGTCCTCCACGGAGAGCACGGCGTCTGGAATGCAGGATGAGGTCAGAGCGGTTGGCGAGGAGCAAAGGTCAGAGGAGCCAAAGCGCAGGGTGGATACTTCAGTGTCTTGGGAGGCGTTGATTTGTGTCGGATCGTCCAAGAAGAGAGCGAGGAAGGCATCCTCTTCAGATGATGAAGGAGGGCCAAGAACACTGGAAGGGGATGGCCACAGAGCGGAGGAGGCTAGCAAAGACAAAGAAG	1	2 Base Changes	VKSATMSSTESTASGMQDEVRAVGEEQRSEEPKRRVDTSVSWEALICVGSSKKRARKASSSDDEGGPRTLEGDGHRAEEASKDKE	VKSATLSSTESTASGMQDEVRAVGEEQRSEEPKRRVDTSVSWEALICVGSSKKRARKASSSDDEGGPRTLGGDGHRAEEASKDKE
GTCAAGAGTGCCACCATGTCCTCCACGGAGAGCACGGCGTCTGGAATGCAGGATGAGGTCAGAGCGGTTGGCGAGGAGCAAAGGTCAGAGGAGCCAAAGCGCAGGGTGGATACTTCAGTGTCTTGGGAGGCGTTGATTTGTGTCGGATCGTCCAAGAAGAGAGCGAGGAAGGCATCCTCTTCAGATGATGAAGGAGGGCCAAGAACACTGGGAGGAGATGGCCACAGAGCGGAGGAGGCTAGCAAAGACAAAGAAG	GTCAAGAGTGCCACCATGTCCTCCACGGAGAGCACGGCGTCTGGAATGCAGGATGAGGTCAGAGCGGTTGGCGAGGAGCAAAGGTCAGAGGAGCCAAAGCGCAGGGTGGATACTTCAGTGTCTTGGGAGGCGTTGATTTGTGTCGGATCGTCCAAGAAGAGAGCGAGGAAGGCATCCTCTTCAGATGATGAAGGAGGGCCAAGAACACTGGGAGGAGATGGCCACAGAGCGGAGGAGGCTAGCAAAGACAAAGAAG	1	2 Base Changes	VKSATMSSTESTASGMQDEVRAVGEEQRSEEPKRRVDTSVSWEALICVGSSKKRARKASSSDDEGGPRTLGGDGHRAEEASKDKE	VKSATLSSTESTASGMQDEVRAVGEEQRSEEPKRRVDTSVSWEALICVGSSKKRARKASSSDDEGGPRTLGGDGHRAEEASKDKE
GTCAAGAGTGCCACCATGTCCTCCACGGAGAGCACGGCGTCTGGAATGCAGGATGAGGTCAGAGCGGTTGGCGAGGAGCAAAGGTCAGAGGAGCCAAAGCGCAGGGTGGATACTTCAGTGTCTTGGGAGGCGTTGATTTGTGTCGGATCGTCCAAGAAGAGAGCGAGGAAGGCATCCTCTTCAGATGATGAAGGAGGGCCAAGAACACTGGGAGGGGATGGCCACACAGCGGAGGAGGCTAGCAAAGACAAAGAAG	GTCAAGAGTGCCACCATGTCCTCCACGGAGAGCACGGCGTCTGGAATGCAGGATGAGGTCAGAGCGGTTGGCGAGGAGCAAAGGTCAGAGGAGCCAAAGCGCAGGGTGGATACTTCAGTGTCTTGGGAGGCGTTGATTTGTGTCGGATCGTCCAAGAAGAGAGCGAGGAAGGCATCCTCTTCAGATGATGAAGGAGGGCCAAGAACACTGGGAGGGGATGGCCACACAGCGGAGGAGGCTAGCAAAGACAAAGAAG	1	2 Base Changes	VKSATMSSTESTASGMQDEVRAVGEEQRSEEPKRRVDTSVSWEALICVGSSKKRARKASSSDDEGGPRTLGGDGHTAEEASKDKE	VKSATLSSTESTASGMQDEVRAVGEEQRSEEPKRRVDTSVSWEALICVGSSKKRARKASSSDDEGGPRTLGGDGHRAEEASKDKE
GTCAAGAGTGCCACCATGTCCTCCACGGAGAGCACGGCGTCTGGAATGCAGGATGAGGTCAGAGCGGTTGGCGAGGAGCAAAGGTCAGAGGAGCCAAAGCGCAGGGTGGATACTTCAGTGTCTTGGGAGGCGTTGATTTGTGTCGGATCGTCCAAGAAGAGAGCGAGGAAGGCATCCTCTTCAGATGATGAAGGAGGGCCAAGAACACTGGGAGGGGATGGCCACAGAACGGAGGAGGCTAGCAAAGACAAAGAAG	GTCAAGAGTGCCACCATGTCCTCCACGGAGAGCACGGCGTCTGGAATGCAGGATGAGGTCAGAGCGGTTGGCGAGGAGCAAAGGTCAGAGGAGCCAAAGCGCAGGGTGGATACTTCAGTGTCTTGGGAGGCGTTGATTTGTGTCGGATCGTCCAAGAAGAGAGCGAGGAAGGCATCCTCTTCAGATGATGAAGGAGGGCCAAGAACACTGGGAGGGGATGGCCACAGAACGGAGGAGGCTAGCAAAGACAAAGAAG	1	2 Base Changes	VKSATMSSTESTASGMQDEVRAVGEEQRSEEPKRRVDTSVSWEALICVGSSKKRARKASSSDDEGGPRTLGGDGHRTEEASKDKE	VKSATLSSTESTASGMQDEVRAVGEEQRSEEPKRRVDTSVSWEALICVGSSKKRARKASSSDDEGGPRTLGGDGHRAEEASKDKE
GTCAAGAGTGCCACCATGTCCTCCACGGAGAGCACGGCGTCTGGAATGCAGGATGAGGTCAGAGCGGTTGGCGAGGAGCAAAGGTCAGAGGAGCCAAAGCGCAGGGTGGATACTTCAGTGTCTTGGGAGGCGTTGATTTGTGTCGGATCGTCCAAGAAGAGAGCGAGGAAGGCATCCTCTTCAGATGATGAAGGAGGGCCAAGAACACTGGGAGGGGATGGCCACAGAGCGGAGAAGGCTAGCAAAGACAAAGAAG	GTCAAGAGTGCCACCATGTCCTCCACGGAGAGCACGGCGTCTGGAATGCAGGATGAGGTCAGAGCGGTTGGCGAGGAGCAAAGGTCAGAGGAGCCAAAGCGCAGGGTGGATACTTCAGTGTCTTGGGAGGCGTTGATTTGTGTCGGATCGTCCAAGAAGAGAGCGAGGAAGGCATCCTCTTCAGATGATGAAGGAGGGCCAAGAACACTGGGAGGGGATGGCCACAGAGCGGAGAAGGCTAGCAAAGACAAAGAAG	1	2 Base Changes	VKSATMSSTESTASGMQDEVRAVGEEQRSEEPKRRVDTSVSWEALICVGSSKKRARKASSSDDEGGPRTLGGDGHRAEKASKDKE	VKSATLSSTESTASGMQDEVRAVGEEQRSEEPKRRVDTSVSWEALICVGSSKKRARKASSSDDEGGPRTLGGDGHRAEEASKDKE
GTCAAGAGTGCCACCATGTCCTCCACGGAGAGCACGGCGTCTGGAATGCAGGATGAGGTCAGAGCGGTTGGCGAGGAGCAAAGGTCAGAGGAGCCAAAGCGCAGGGTGGATACTTCAGTGTCTTGGGAGGCGTTGATTTGTGTCGGATCGTCCAAGAAGAGAGCGAGGAAGGCATCCTCTTCAGATGATGAAGGAGGGCCAAGAACACTGGGAGGGGATGGCCACAGAGCGGAGGAGGATAGCAAAGACAAAGAAG	GTCAAGAGTGCCACCATGTCCTCCACGGAGAGCACGGCGTCTGGAATGCAGGATGAGGTCAGAGCGGTTGGCGAGGAGCAAAGGTCAGAGGAGCCAAAGCGCAGGGTGGATACTTCAGTGTCTTGGGAGGCGTTGATTTGTGTCGGATCGTCCAAGAAGAGAGCGAGGAAGGCATCCTCTTCAGATGATGAAGGAGGGCCAAGAACACTGGGAGGGGATGGCCACAGAGCGGAGGAGGATAGCAAAGACAAAGAAG	1	2 Base Changes	VKSATMSSTESTASGMQDEVRAVGEEQRSEEPKRRVDTSVSWEALICVGSSKKRARKASSSDDEGGPRTLGGDGHRAEEDSKDKE	VKSATLSSTESTASGMQDEVRAVGEEQRSEEPKRRVDTSVSWEALICVGSSKKRARKASSSDDEGGPRTLGGDGHRAEEASKDKE
GTCAAGAGTGCCACCATGTCCTCCACGGAGAGCACGGCGTCTGGAATGCAGGATGAGGTCAGAGCGGTTGGCGAGGAGCAAAGGTCAGAGGAGCCAAAGCGCAGGGTGGATACTTCAGTGTCTTGGGAGGCGTTGATTTGTGTCGGATCGTCCAAGAAGAGAGCGAGGAAGGCATCCTCTTCAGATGATGAAGGAGGGCCAAGAACACTGGGAGGGGATGGCCACAGAGCGGAGGAGGCTAGAAAAGACAAAGAAG	GTCAAGAGTGCCACCATGTCCTCCACGGAGAGCACGGCGTCTGGAATGCAGGATGAGGTCAGAGCGGTTGGCGAGGAGCAAAGGTCAGAGGAGCCAAAGCGCAGGGTGGATACTTCAGTGTCTTGGGAGGCGTTGATTTGTGTCGGATCGTCCAAGAAGAGAGCGAGGAAGGCATCCTCTTCAGATGATGAAGGAGGGCCAAGAACACTGGGAGGGGATGGCCACAGAGCGGAGGAGGCTAGAAAAGACAAAGAAG	1	2 Base Changes	VKSATMSSTESTASGMQDEVRAVGEEQRSEEPKRRVDTSVSWEALICVGSSKKRARKASSSDDEGGPRTLGGDGHRAEEARKDKE	VKSATLSSTESTASGMQDEVRAVGEEQRSEEPKRRVDTSVSWEALICVGSSKKRARKASSSDDEGGPRTLGGDGHRAEEASKDKE
GTCAAGAGTGCCACCATGTCCTCCACGGAGAGCACGGCGTCTGGAATGCAGGATGAGGTCAGAGCGGTTGGCGAGGAGCAAAGGTCAGAGGAGCCAAAGCGCAGGGTGGATACTTCAGTGTCTTGGGAGGCGTTGATTTGTGTCGGATCGTCCAAGAAGAGAGCGAGGAAGGCATCCTCTTCAGATGATGAAGGAGGGCCAAGAACACTGGGAGGGGATGGCCACAGAGCGGAGGAGGCTAGCACAGACAAAGAAG	GTCAAGAGTGCCACCATGTCCTCCACGGAGAGCACGGCGTCTGGAATGCAGGATGAGGTCAGAGCGGTTGGCGAGGAGCAAAGGTCAGAGGAGCCAAAGCGCAGGGTGGATACTTCAGTGTCTTGGGAGGCGTTGATTTGTGTCGGATCGTCCAAGAAGAGAGCGAGGAAGGCATCCTCTTCAGATGATGAAGGAGGGCCAAGAACACTGGGAGGGGATGGCCACAGAGCGGAGGAGGCTAGCACAGACAAAGAAG	1	2 Base Changes	VKSATMSSTESTASGMQDEVRAVGEEQRSEEPKRRVDTSVSWEALICVGSSKKRARKASSSDDEGGPRTLGGDGHRAEEASTDKE	VKSATLSSTESTASGMQDEVRAVGEEQRSEEPKRRVDTSVSWEALICVGSSKKRARKASSSDDEGGPRTLGGDGHRAEEASKDKE
GTCAAGAGTGCCACCATGTCCTCCACGGAGAGCACGGCGTCTGGAATGCAGGATGAGGTCAGAGCGGTTGGCGAGGAGCAAAGGTCAGAGGAGCCAAAGCGCAGGGTGGATACTTCAGTGTCTTGGGAGGCGTTGATTTGTGTCGGATCGTCCAAGAAGAGAGCGAGGAAGGCATCCTCTTCAGATGATGAAGGAGGGCCAAGAACACTGGGAGGGGATGGCCACAGTGCGGAGGAGGCTAGCAAAGACAAAGAAG	GTCAAGAGTGCCACCATGTCCTCCACGGAGAGCACGGCGTCTGGAATGCAGGATGAGGTCAGAGCGGTTGGCGAGGAGCAAAGGTCAGAGGAGCCAAAGCGCAGGGTGGATACTTCAGTGTCTTGGGAGGCGTTGATTTGTGTCGGATCGTCCAAGAAGAGAGCGAGGAAGGCATCCTCTTCAGATGATGAAGGAGGGCCAAGAACACTGGGAGGGGATGGCCACAGTGCGGAGGAGGCTAGCAAAGACAAAGAAG	1	2 Base Changes	VKSATMSSTESTASGMQDEVRAVGEEQRSEEPKRRVDTSVSWEALICVGSSKKRARKASSSDDEGGPRTLGGDGHSAEEASKDKE	VKSATLSSTESTASGMQDEVRAVGEEQRSEEPKRRVDTSVSWEALICVGSSKKRARKASSSDDEGGPRTLGGDGHRAEEASKDKE
GTCAAGAGTGCCACCATGTCCTCCACGGAGAGCACGGCGTCTGGAATGCAGGATGAGGTCAGAGCGGTTGGCGAGGAGCAAAGGTCAGAGGAGCCAAAGCGCAGGGTGGATACTTCAGTGTCTTGGGAGGCGTTGATTTGTGTCGGATCGTCCAAGAAGAGAGCGAGGAAGGCATCCTCTTCAGATGATGAAGGAGGGCCAAGAACACTGGGAGTGGATTGCCACACAGCGGAGGAGGCTAGAAAATACAAAGAAG	GTCAAGAGTGCCACCATGTCCTCCACGGAGAGCACGGCGTCTGGAATGCAGGATGAGGTCAGAGCGGTTGGCGAGGAGCAAAGGTCAGAGGAGCCAAAGCGCAGGGTGGATACTTCAGTGTCTTGGGAGGCGTTGATTTGTGTCGGATCGTCCAAGAAGAGAGCGAGGAAGGCATCCTCTTCAGATGATGAAGGAGGGCCAAGAACACTGGGAGTGGATTGCCACACAGCGGAGGAGGCTAGAAAATACAAAGAAG	1	6 Base Changes	VKSATMSSTESTASGMQDEVRAVGEEQRSEEPKRRVDTSVSWEALICVGSSKKRARKASSSDDEGGPRTLGVDCHTAEEARKYKE	VKSATLSSTESTASGMQDEVRAVGEEQRSEEPKRRVDTSVSWEALICVGSSKKRARKASSSDDEGGPRTLGGDGHRAEEASKDKE
GTCAAGAGTGCCACCATGTCCTCCACGGAGAGCACGGCGTCTGGAATGCAGGATGAGGTCAGAGCGGTTGGCGAGGAGCAAAGGTCAGAGGAGCCAAAGCGCAGGGTGGATACTTCAGTGTCTTGGGAGGCGTTGATTTGTGTCGGATCGTCCAAGAAGAGAGCGAGGAAGGCATCCTCTTCAGATGATGAAGGAGGGCCAAGAACACTGGGGGGGGATGGCCACAGAGCGGAGGAGGCTAGCAAAGACAAAGAAG	GTCAAGAGTGCCACCATGTCCTCCACGGAGAGCACGGCGTCTGGAATGCAGGATGAGGTCAGAGCGGTTGGCGAGGAGCAAAGGTCAGAGGAGCCAAAGCGCAGGGTGGATACTTCAGTGTCTTGGGAGGCGTTGATTTGTGTCGGATCGTCCAAGAAGAGAGCGAGGAAGGCATCCTCTTCAGATGATGAAGGAGGGCCAAGAACACTGGGGGGGGATGGCCACAGAGCGGAGGAGGCTAGCAAAGACAAAGAAG	1	2 Base Changes	VKSATMSSTESTASGMQDEVRAVGEEQRSEEPKRRVDTSVSWEALICVGSSKKRARKASSSDDEGGPRTLGGDGHRAEEASKDKE	VKSATLSSTESTASGMQDEVRAVGEEQRSEEPKRRVDTSVSWEALICVGSSKKRARKASSSDDEGGPRTLGGDGHRAEEASKDKE
GTCAAGAGTGCCACCATGTCCTCCACGGAGAGCACGGCGTCTGGAATGCAGGATGAGGTCAGAGCGGTTGGCGAGGAGCAAAGGTCAGAGGAGCCAAAGCGCAGGGTGGATACTTCAGTGTCTTGGGAGGCGTTGATTTGTGTCGGATCGTCCAAGAAGAGAGCGAGGAAGGCATCCTCTTCAGATGATGAAGGAGGGCCAAGAACCCTGGGAGGGGATGGCCACAGAGCGGAGGAGGCTAGCAAAGACAAAGAAG	GTCAAGAGTGCCACCATGTCCTCCACGGAGAGCACGGCGTCTGGAATGCAGGATGAGGTCAGAGCGGTTGGCGAGGAGCAAAGGTCAGAGGAGCCAAAGCGCAGGGTGGATACTTCAGTGTCTTGGGAGGCGTTGATTTGTGTCGGATCGTCCAAGAAGAGAGCGAGGAAGGCATCCTCTTCAGATGATGAAGGAGGGCCAAGAACCCTGGGAGGGGATGGCCACAGAGCGGAGGAGGCTAGCAAAGACAAAGAAG	1	2 Base Changes	VKSATMSSTESTASGMQDEVRAVGEEQRSEEPKRRVDTSVSWEALICVGSSKKRARKASSSDDEGGPRTLGGDGHRAEEASKDKE	VKSATLSSTESTASGMQDEVRAVGEEQRSEEPKRRVDTSVSWEALICVGSSKKRARKASSSDDEGGPRTLGGDGHRAEEASKDKE
GTCAAGAGTGCCACCATGTCCTCCACGGAGAGCACGGCGTCTGGAATGCAGGATGAGGTCAGAGCGGTTGGCGAGGAGCAAAGGTCAGAGGAGCCAAAGCGCAGGGTGGATACTTCAGTGTCTTGGGAGGCGTTGATTTGTGTCGGATCGTCCAAGAAGAGAGCGAGGAAGGCATCCTCTTCAGATGATGAAGGAGGGCCAAGGACACTGGGAGGGGATGGCCACAGAGCGGAGGAGGCTAGCAAAGACAAAGAAG	GTCAAGAGTGCCACCATGTCCTCCACGGAGAGCACGGCGTCTGGAATGCAGGATGAGGTCAGAGCGGTTGGCGAGGAGCAAAGGTCAGAGGAGCCAAAGCGCAGGGTGGATACTTCAGTGTCTTGGGAGGCGTTGATTTGTGTCGGATCGTCCAAGAAGAGAGCGAGGAAGGCATCCTCTTCAGATGATGAAGGAGGGCCAAGGACACTGGGAGGGGATGGCCACAGAGCGGAGGAGGCTAGCAAAGACAAAGAAG	1	2 Base Changes	VKSATMSSTESTASGMQDEVRAVGEEQRSEEPKRRVDTSVSWEALICVGSSKKRARKASSSDDEGGPRTLGGDGHRAEEASKDKE	VKSATLSSTESTASGMQDEVRAVGEEQRSEEPKRRVDTSVSWEALICVGSSKKRARKASSSDDEGGPRTLGGDGHRAEEASKDKE
GTCAAGAGTGCCACCATGTCCTCCACGGAGAGCACGGCGTCTGGAATGCAGGATGAGGTCAGAGCGGTTGGCGAGGAGCAAAGGTCAGAGGAGCCAAAGCGCAGGGTGGATACTTCAGTGTCTTGGGAGGCGTTGATTTGTGTCGGATCGTCCAAGAAGAGAGCGAGGAAGGCATCCTCTTCGGATGATGAAGGAGGGCCAAGAACACTGGGAGGGGATGGCCACAGAGCGGAGGAGGCTAGCAAAGACAAAGAAG	GTCAAGAGTGCCACCATGTCCTCCACGGAGAGCACGGCGTCTGGAATGCAGGATGAGGTCAGAGCGGTTGGCGAGGAGCAAAGGTCAGAGGAGCCAAAGCGCAGGGTGGATACTTCAGTGTCTTGGGAGGCGTTGATTTGTGTCGGATCGTCCAAGAAGAGAGCGAGGAAGGCATCCTCTTCGGATGATGAAGGAGGGCCAAGAACACTGGGAGGGGATGGCCACAGAGCGGAGGAGGCTAGCAAAGACAAAGAAG	1	2 Base Changes	VKSATMSSTESTASGMQDEVRAVGEEQRSEEPKRRVDTSVSWEALICVGSSKKRARKASSSDDEGGPRTLGGDGHRAEEASKDKE	VKSATLSSTESTASGMQDEVRAVGEEQRSEEPKRRVDTSVSWEALICVGSSKKRARKASSSDDEGGPRTLGGDGHRAEEASKDKE
GTCAAGAGTGCCACCATGTCCTCCACGGAGAGCACGGCGTCTGGAATGCAGGATGAGGTCAGAGCGGTTGGCGAGGAGCAAAGGTCAGAGGAGCCAAAGCGCAGGGTGGATACTTCAGTGTCTTGGGAGGCGTTGATTTGTGTCGGATCGTCCAAGACGAGAGCGAGGAAGGCATCCTCTTCAGATGATGAAGGAGGGCCAAGAACACTGGGTGGGGATGGCCACAGAGCGGAGGAGGCTAGCAAAGACAAAGAAG	GTCAAGAGTGCCACCATGTCCTCCACGGAGAGCACGGCGTCTGGAATGCAGGATGAGGTCAGAGCGGTTGGCGAGGAGCAAAGGTCAGAGGAGCCAAAGCGCAGGGTGGATACTTCAGTGTCTTGGGAGGCGTTGATTTGTGTCGGATCGTCCAAGACGAGAGCGAGGAAGGCATCCTCTTCAGATGATGAAGGAGGGCCAAGAACACTGGGTGGGGATGGCCACAGAGCGGAGGAGGCTAGCAAAGACAAAGAAG	1	3 Base Changes	VKSATMSSTESTASGMQDEVRAVGEEQRSEEPKRRVDTSVSWEALICVGSSKTRARKASSSDDEGGPRTLGGDGHRAEEASKDKE	VKSATLSSTESTASGMQDEVRAVGEEQRSEEPKRRVDTSVSWEALICVGSSKKRARKASSSDDEGGPRTLGGDGHRAEEASKDKE
GTCAAGAGTGCCACCATGTCCTCCACGGAGAGCACGGCGTCTGGAATGCAGGATGAGGTCAGAGCGGTTGGCGAGGAGCAAAGGTCAGAGGAGCCAAAGCGCAGGGTGGATACTTCAGTGTCTTGGGAGGCGTTGATTTGTGTCGGATCGTCCAAGGAGAGAGCGAGGAAGGCATCCTCATCAGATGATGAAGGAGGGCCAAGAACACTGGGAGGGGATGGCCACAGAGCGGAGGAGGCTAGCAAAGACAAAGAAG	GTCAAGAGTGCCACCATGTCCTCCACGGAGAGCACGGCGTCTGGAATGCAGGATGAGGTCAGAGCGGTTGGCGAGGAGCAAAGGTCAGAGGAGCCAAAGCGCAGGGTGGATACTTCAGTGTCTTGGGAGGCGTTGATTTGTGTCGGATCGTCCAAGGAGAGAGCGAGGAAGGCATCCTCATCAGATGATGAAGGAGGGCCAAGAACACTGGGAGGGGATGGCCACAGAGCGGAGGAGGCTAGCAAAGACAAAGAAG	1	3 Base Changes	VKSATMSSTESTASGMQDEVRAVGEEQRSEEPKRRVDTSVSWEALICVGSSKERARKASSSDDEGGPRTLGGDGHRAEEASKDKE	VKSATLSSTESTASGMQDEVRAVGEEQRSEEPKRRVDTSVSWEALICVGSSKKRARKASSSDDEGGPRTLGGDGHRAEEASKDKE
GTCAAGAGTGCCACCATGTCCTCCACGGAGAGCACGGCGTCTGGAATGCAGGATGAGGTCAGAGCGGTTGGCGAGGAGCAAAGGTCAGAGGAGCCAAAGCGCAGGGTGGATACTTCAGTGTCTTGGGAGGCGTTGATTTGTGTCGGATCGTCCCAGAAGAGAGCGAGGAAGGCATCCTCTTCAGATGATGAAGGGGGGCCAAGAACACTGGGAGGGGCTGGCCACAGAGCGGAGGAGGCTAGCAAAGACAAAGAAG	GTCAAGAGTGCCACCATGTCCTCCACGGAGAGCACGGCGTCTGGAATGCAGGATGAGGTCAGAGCGGTTGGCGAGGAGCAAAGGTCAGAGGAGCCAAAGCGCAGGGTGGATACTTCAGTGTCTTGGGAGGCGTTGATTTGTGTCGGATCGTCCCAGAAGAGAGCGAGGAAGGCATCCTCTTCAGATGATGAAGGGGGGCCAAGAACACTGGGAGGGGCTGGCCACAGAGCGGAGGAGGCTAGCAAAGACAAAGAAG	1	4 Base Changes	VKSATMSSTESTASGMQDEVRAVGEEQRSEEPKRRVDTSVSWEALICVGSSQKRARKASSSDDEGGPRTLGGAGHRAEEASKDKE	VKSATLSSTESTASGMQDEVRAVGEEQRSEEPKRRVDTSVSWEALICVGSSKKRARKASSSDDEGGPRTLGGDGHRAEEASKDKE
GTCAAGAGTGCCACCATGTCCTCCACGGAGAGCACGGCGTCTGGAATGCAGGATGAGGTCAGAGCGGTTGGCGAGGAGCAAAGGTCAGAGGAGCCAAAGCGCAGGGTGGATACTTCAGTGTCTTGGGAGGCGTTGATTTGTGTCTGATCGTCCAAGAAGAGAGCGAGGAAGGCATCCTCTTCAGATGATGAAGGAGGGCCAAGAACACTGGGAGGGGATGGCCACAGAGCGGAGGAGGCTAGCAAAGATAAAGAAG	GTCAAGAGTGCCACCATGTCCTCCACGGAGAGCACGGCGTCTGGAATGCAGGATGAGGTCAGAGCGGTTGGCGAGGAGCAAAGGTCAGAGGAGCCAAAGCGCAGGGTGGATACTTCAGTGTCTTGGGAGGCGTTGATTTGTGTCTGATCGTCCAAGAAGAGAGCGAGGAAGGCATCCTCTTCAGATGATGAAGGAGGGCCAAGAACACTGGGAGGGGATGGCCACAGAGCGGAGGAGGCTAGCAAAGATAAAGAAG	1	3 Base Changes	VKSATMSSTESTASGMQDEVRAVGEEQRSEEPKRRVDTSVSWEALICV*	VKSATLSSTESTASGMQDEVRAVGEEQRSEEPKRRVDTSVSWEALICVGSSKKRARKASSSDDEGGPRTLGGDGHRAEEASKDKE
GTCAAGAGTGCCACCATGTCCTCCACGGAGAGCACGGCGTCTGGAATGCAGGATGAGGTCAGAGCGGTTGGCGAGGAGCAAAGGTCAGAGGAGCCAAAGCGCAGGGTGGATACTTCAGTGTCTTGGGGGGCGTTGATTTGTGTCGGATCGTCCAAGAAGAGAGCGAGGAAGGCATCCTCTTCAGATGATGAAGGAGGGCCAAGAACACTGGGAGGGGATGGCCACAGAGCGGAGGAGGCTAGCAAAGACAAAGAAG	GTCAAGAGTGCCACCATGTCCTCCACGGAGAGCACGGCGTCTGGAATGCAGGATGAGGTCAGAGCGGTTGGCGAGGAGCAAAGGTCAGAGGAGCCAAAGCGCAGGGTGGATACTTCAGTGTCTTGGGGGGCGTTGATTTGTGTCGGATCGTCCAAGAAGAGAGCGAGGAAGGCATCCTCTTCAGATGATGAAGGAGGGCCAAGAACACTGGGAGGGGATGGCCACAGAGCGGAGGAGGCTAGCAAAGACAAAGAAG	1	2 Base Changes	VKSATMSSTESTASGMQDEVRAVGEEQRSEEPKRRVDTSVSWGALICVGSSKKRARKASSSDDEGGPRTLGGDGHRAEEASKDKE	VKSATLSSTESTASGMQDEVRAVGEEQRSEEPKRRVDTSVSWEALICVGSSKKRARKASSSDDEGGPRTLGGDGHRAEEASKDKE
GTCAAGAGTGCCACCATGTCCTCCACGGAGAGCACGGCGTCTGGAATGCAGGATGAGGTCAGAGCGGTTGGCGAGGAGCAAAGGTCAGAGGAGCCAAAGCGCAGGGTGGATACTTGAGTGTCTTGGGAGGCGTTGATTTGTGTCGGATCGTCCAAGAAGAGAGCGAGGAAGGCATCCTCTTCAGATGTTGAAGGAGGGCCAAGAACACTGGGAGGGGATGGCCACAGAGCGGAGGAGGCTTGCAAAGACAAAGAAG	GTCAAGAGTGCCACCATGTCCTCCACGGAGAGCACGGCGTCTGGAATGCAGGATGAGGTCAGAGCGGTTGGCGAGGAGCAAAGGTCAGAGGAGCCAAAGCGCAGGGTGGATACTTGAGTGTCTTGGGAGGCGTTGATTTGTGTCGGATCGTCCAAGAAGAGAGCGAGGAAGGCATCCTCTTCAGATGTTGAAGGAGGGCCAAGAACACTGGGAGGGGATGGCCACAGAGCGGAGGAGGCTTGCAAAGACAAAGAAG	1	4 Base Changes	VKSATMSSTESTASGMQDEVRAVGEEQRSEEPKRRVDT*	VKSATLSSTESTASGMQDEVRAVGEEQRSEEPKRRVDTSVSWEALICVGSSKKRARKASSSDDEGGPRTLGGDGHRAEEASKDKE
GTCAAGAGTGCCACCATGTCCTCCACGGAGAGCACGGCGTCTGGAATGCAGGATGAGGTCAGAGCGGTTGGCGAGGAGCAAAGGTCAGAGGAGTCAAAGCGCAGGGTGGATACTTCAGTGTCTTGGGAGGCGTTGATTTGTGTCGGATCGTCCAAGAAGAGAGCGAGGAAGGCATCCTCTTCAGATGATGAAGGAGGGCCAAGAACACTGGGAGGGGATGGCCACAGAGCGGAGGAGGCTAGCAAAGACAAAGAAG	GTCAAGAGTGCCACCATGTCCTCCACGGAGAGCACGGCGTCTGGAATGCAGGATGAGGTCAGAGCGGTTGGCGAGGAGCAAAGGTCAGAGGAGTCAAAGCGCAGGGTGGATACTTCAGTGTCTTGGGAGGCGTTGATTTGTGTCGGATCGTCCAAGAAGAGAGCGAGGAAGGCATCCTCTTCAGATGATGAAGGAGGGCCAAGAACACTGGGAGGGGATGGCCACAGAGCGGAGGAGGCTAGCAAAGACAAAGAAG	1	2 Base Changes	VKSATMSSTESTASGMQDEVRAVGEEQRSEESKRRVDTSVSWEALICVGSSKKRARKASSSDDEGGPRTLGGDGHRAEEASKDKE	VKSATLSSTESTASGMQDEVRAVGEEQRSEEPKRRVDTSVSWEALICVGSSKKRARKASSSDDEGGPRTLGGDGHRAEEASKDKE
GTCAAGAGTGCCACCATGTCCTCCACGGAGAGCACGGCGTCTGGAATGCAGGATGAGGTCAGAGCGGTTGGCGAGGAGCAAAGGTCAGGGGAGCCAAAGCGCAGGGTGGATACTTCAGTGTCTTGGGAGGCGTTGATTTGTGTCGGATCGTCCAAGAAGAGAGCGAGGAAGGCATCCTCTTCAGATGATGAAGGAGGGCCAAGAACACTGGGAGGGGATGGCCACAGAGCGGAGGAGGCTAGCAAAGACAAAGAAG	GTCAAGAGTGCCACCATGTCCTCCACGGAGAGCACGGCGTCTGGAATGCAGGATGAGGTCAGAGCGGTTGGCGAGGAGCAAAGGTCAGGGGAGCCAAAGCGCAGGGTGGATACTTCAGTGTCTTGGGAGGCGTTGATTTGTGTCGGATCGTCCAAGAAGAGAGCGAGGAAGGCATCCTCTTCAGATGATGAAGGAGGGCCAAGAACACTGGGAGGGGATGGCCACAGAGCGGAGGAGGCTAGCAAAGACAAAGAAG	1	2 Base Changes	VKSATMSSTESTASGMQDEVRAVGEEQRSGEPKRRVDTSVSWEALICVGSSKKRARKASSSDDEGGPRTLGGDGHRAEEASKDKE	VKSATLSSTESTASGMQDEVRAVGEEQRSEEPKRRVDTSVSWEALICVGSSKKRARKASSSDDEGGPRTLGGDGHRAEEASKDKE
GTCAAGAGTGCCACCATGTCCTCCACGGAGAGCACGGCGTCTGGAATGCAGGATGAGGTCAGAGCGGTTGGCGAGGAGCAAAGGTCTGAGGAGCCAAAGCGCAGGGTGGATACTTCAGTGTCTTGGGAGGCGTTGATTTGTGTCGGATCGTCCAAGAAGAGAGCGAGGAAGGCATCCTCTTCAGATGATGAAGGAGGGCCAAGAACACTGGGAGGGGAAGGCAACAGAGCGGAGGAGGCTAGCAAAGACAAAGAAG	GTCAAGAGTGCCACCATGTCCTCCACGGAGAGCACGGCGTCTGGAATGCAGGATGAGGTCAGAGCGGTTGGCGAGGAGCAAAGGTCTGAGGAGCCAAAGCGCAGGGTGGATACTTCAGTGTCTTGGGAGGCGTTGATTTGTGTCGGATCGTCCAAGAAGAGAGCGAGGAAGGCATCCTCTTCAGATGATGAAGGAGGGCCAAGAACACTGGGAGGGGAAGGCAACAGAGCGGAGGAGGCTAGCAAAGACAAAGAAG	1	4 Base Changes	VKSATMSSTESTASGMQDEVRAVGEEQRSEEPKRRVDTSVSWEALICVGSSKKRARKASSSDDEGGPRTLGGEGNRAEEASKDKE	VKSATLSSTESTASGMQDEVRAVGEEQRSEEPKRRVDTSVSWEALICVGSSKKRARKASSSDDEGGPRTLGGDGHRAEEASKDKE
GTCAAGAGTGCCACCATGTCCTCCACGGAGAGCACGGCGTCTGGAATGCAGGATGAGGTCAGAGCGGTTGGCGAGGAGCAGAGGTCAGAGGAGCCAAAGCGCAGGGTGGATACTTCAGTGTCTTGGGAGGCGTTGATTTGTGTCGGATCGTCCAAGAAGAGAGCGAGGAAGGCATCCTCTTCAGATGATGAAGGAGGGCCAAGAACACTGGGAGGGGATGGCCACAGAGCGGAGGAGGCTAGCAAAGACAAAGAAG	GTCAAGAGTGCCACCATGTCCTCCACGGAGAGCACGGCGTCTGGAATGCAGGATGAGGTCAGAGCGGTTGGCGAGGAGCAGAGGTCAGAGGAGCCAAAGCGCAGGGTGGATACTTCAGTGTCTTGGGAGGCGTTGATTTGTGTCGGATCGTCCAAGAAGAGAGCGAGGAAGGCATCCTCTTCAGATGATGAAGGAGGGCCAAGAACACTGGGAGGGGATGGCCACAGAGCGGAGGAGGCTAGCAAAGACAAAGAAG	1	2 Base Changes	VKSATMSSTESTASGMQDEVRAVGEEQRSEEPKRRVDTSVSWEALICVGSSKKRARKASSSDDEGGPRTLGGDGHRAEEASKDKE	VKSATLSSTESTASGMQDEVRAVGEEQRSEEPKRRVDTSVSWEALICVGSSKKRARKASSSDDEGGPRTLGGDGHRAEEASKDKE
GTCAAGAGTGCCACCATGTCCTCCACGGAGAGCACGGCGTCTGGAATGCAGGATGAGGTCAGAGCGGTTGGCGGGGAGCAAAGGTCAGAGGAGCCAAAGCGCAGGGTGGATACTTCAGTGTCTTGGGAGGCGTTGATTTGTGTCGGATCGTCCAAGAAGAGAGAGAGGAAGGCATCCTCTTCAGATGATGAAGGAGGGCCAAGAACACTGGGAGGGGATGGCCACAGAGCGGAGGAGGCTAGCAAAGACAAAGAAG	GTCAAGAGTGCCACCATGTCCTCCACGGAGAGCACGGCGTCTGGAATGCAGGATGAGGTCAGAGCGGTTGGCGGGGAGCAAAGGTCAGAGGAGCCAAAGCGCAGGGTGGATACTTCAGTGTCTTGGGAGGCGTTGATTTGTGTCGGATCGTCCAAGAAGAGAGAGAGGAAGGCATCCTCTTCAGATGATGAAGGAGGGCCAAGAACACTGGGAGGGGATGGCCACAGAGCGGAGGAGGCTAGCAAAGACAAAGAAG	1	3 Base Changes	VKSATMSSTESTASGMQDEVRAVGGEQRSEEPKRRVDTSVSWEALICVGSSKKRERKASSSDDEGGPRTLGGDGHRAEEASKDKE	VKSATLSSTESTASGMQDEVRAVGEEQRSEEPKRRVDTSVSWEALICVGSSKKRARKASSSDDEGGPRTLGGDGHRAEEASKDKE
GTCAAGAGTGCCACCATGTCCTCCACGGAGAGCACGGCGTCTGGAATGCAGGATGAGGTCAGAGCGGTTTGCGAGGAGCAAAGGTCAGAGGAGCCAAAGCGCAGGGTGGATACTTCAGTGTCTTGGGAGGCGTTGATTTGTGTCGGATCGTCCAAGAAGAGAGCGAGGAAGGCATCCTCTTCAGATGATGAAGGAGGGCCAAGAACACTGGGAGGGGATGGCCACAGAGCGGAGGAGGCTAGCAAAGACAAAGAAG	GTCAAGAGTGCCACCATGTCCTCCACGGAGAGCACGGCGTCTGGAATGCAGGATGAGGTCAGAGCGGTTTGCGAGGAGCAAAGGTCAGAGGAGCCAAAGCGCAGGGTGGATACTTCAGTGTCTTGGGAGGCGTTGATTTGTGTCGGATCGTCCAAGAAGAGAGCGAGGAAGGCATCCTCTTCAGATGATGAAGGAGGGCCAAGAACACTGGGAGGGGATGGCCACAGAGCGGAGGAGGCTAGCAAAGACAAAGAAG	1	2 Base Changes	VKSATMSSTESTASGMQDEVRAVCEEQRSEEPKRRVDTSVSWEALICVGSSKKRARKASSSDDEGGPRTLGGDGHRAEEASKDKE	VKSATLSSTESTASGMQDEVRAVGEEQRSEEPKRRVDTSVSWEALICVGSSKKRARKASSSDDEGGPRTLGGDGHRAEEASKDKE
GTCAAGAGTGCCACCATGTCCTCCACGGAGAGCACGGCGTCTGGAATGCAGGATGAGGTCAGAGCGTTTGGCGAGGAGCAAAGGTCAGAGGAGCCAAAGCGCAGGGTGGATACTTCAGTGTCTTGGGAGGCGTTGATTTGTGTCGGATCGTCCAAGAAGAGAGCGAGGAAGGCATCCTCTTCAGATGATGAAGGAGGGCCAAGAACACTGGGAGGGGATGGCCACAGAGCGGAGGAGGCTAGCAAAGACAAAGAAG	GTCAAGAGTGCCACCATGTCCTCCACGGAGAGCACGGCGTCTGGAATGCAGGATGAGGTCAGAGCGTTTGGCGAGGAGCAAAGGTCAGAGGAGCCAAAGCGCAGGGTGGATACTTCAGTGTCTTGGGAGGCGTTGATTTGTGTCGGATCGTCCAAGAAGAGAGCGAGGAAGGCATCCTCTTCAGATGATGAAGGAGGGCCAAGAACACTGGGAGGGGATGGCCACAGAGCGGAGGAGGCTAGCAAAGACAAAGAAG	1	2 Base Changes	VKSATMSSTESTASGMQDEVRAFGEEQRSEEPKRRVDTSVSWEALICVGSSKKRARKASSSDDEGGPRTLGGDGHRAEEASKDKE	VKSATLSSTESTASGMQDEVRAVGEEQRSEEPKRRVDTSVSWEALICVGSSKKRARKASSSDDEGGPRTLGGDGHRAEEASKDKE
GTCAAGAGTGCCACCATGTCCTCCACGGAGAGCACGGCGTCTGGAATGCAGGATGAGTTCAGAGCGGTTGGCGAGGAGCAAAGGTCAGAGGAGCCAAAGCGCAGGGTGGATACTTCAGTGTCTTGGGAGGCGTTGATTTGTGTCGGATCGTCCAAGAAGAGAGCGAGGAAGGCATCCTCTTCAGATGATGAAGGAGGGCCAAGAACACTGGGAGGGGATGGCCACAGAGCGGAGGAGGCTAGCAAAGACAAAGAAG	GTCAAGAGTGCCACCATGTCCTCCACGGAGAGCACGGCGTCTGGAATGCAGGATGAGTTCAGAGCGGTTGGCGAGGAGCAAAGGTCAGAGGAGCCAAAGCGCAGGGTGGATACTTCAGTGTCTTGGGAGGCGTTGATTTGTGTCGGATCGTCCAAGAAGAGAGCGAGGAAGGCATCCTCTTCAGATGATGAAGGAGGGCCAAGAACACTGGGAGGGGATGGCCACAGAGCGGAGGAGGCTAGCAAAGACAAAGAAG	1	2 Base Changes	VKSATMSSTESTASGMQDEFRAVGEEQRSEEPKRRVDTSVSWEALICVGSSKKRARKASSSDDEGGPRTLGGDGHRAEEASKDKE	VKSATLSSTESTASGMQDEVRAVGEEQRSEEPKRRVDTSVSWEALICVGSSKKRARKASSSDDEGGPRTLGGDGHRAEEASKDKE
GTCAAGAGTGCCACCATGTCCTCCACGGAGAGCACGGCGTCTGGAATGCAGGATGATGTCAGAGCGGTTGGCGAGGAGCAAAGGTCAGAGGAGACAAAGCGCAGGGTGGATACTTCAGTGTCTTGGGAGGAGTTGATTTGTGTCGGATCGTCCAAGAAGAGAGCGAGGAAGGCATCCTCTTCAGATGATGGAGGAGGGCCAAGAACACTGGGAGGGGATGGCCACAGAGCGGAGGAGGCTAGCAAAGACAAAGAAG	GTCAAGAGTGCCACCATGTCCTCCACGGAGAGCACGGCGTCTGGAATGCAGGATGATGTCAGAGCGGTTGGCGAGGAGCAAAGGTCAGAGGAGACAAAGCGCAGGGTGGATACTTCAGTGTCTTGGGAGGAGTTGATTTGTGTCGGATCGTCCAAGAAGAGAGCGAGGAAGGCATCCTCTTCAGATGATGGAGGAGGGCCAAGAACACTGGGAGGGGATGGCCACAGAGCGGAGGAGGCTAGCAAAGACAAAGAAG	1	5 Base Changes	VKSATMSSTESTASGMQDDVRAVGEEQRSEETKRRVDTSVSWEELICVGSSKKRARKASSSDDGGGPRTLGGDGHRAEEASKDKE	VKSATLSSTESTASGMQDEVRAVGEEQRSEEPKRRVDTSVSWEALICVGSSKKRARKASSSDDEGGPRTLGGDGHRAEEASKDKE
GTCAAGAGTGCCACCATGTCCTCCACGGAGAGCACGGCGTCTGGAATGCAGGATGATGTCAGAGCGGTTGGCGAGGATCAAAGGTCAGAGGAGCCAAAGCGCAGGGTGGATACTTCAGTGTCTTGGGAGGCGTTGATTTGTGTCGGATCGTCCAAGAAGAGAGCGAGGAAGGCATCCTCTTCAGATGATGAAGGAGGGCCAAGAACACTGGGAGGGGATGGCCACAGAGCGGAGGAGGCTAGCAAAGACAAAGAAG	GTCAAGAGTGCCACCATGTCCTCCACGGAGAGCACGGCGTCTGGAATGCAGGATGATGTCAGAGCGGTTGGCGAGGATCAAAGGTCAGAGGAGCCAAAGCGCAGGGTGGATACTTCAGTGTCTTGGGAGGCGTTGATTTGTGTCGGATCGTCCAAGAAGAGAGCGAGGAAGGCATCCTCTTCAGATGATGAAGGAGGGCCAAGAACACTGGGAGGGGATGGCCACAGAGCGGAGGAGGCTAGCAAAGACAAAGAAG	1	3 Base Changes	VKSATMSSTESTASGMQDDVRAVGEDQRSEEPKRRVDTSVSWEALICVGSSKKRARKASSSDDEGGPRTLGGDGHRAEEASKDKE	VKSATLSSTESTASGMQDEVRAVGEEQRSEEPKRRVDTSVSWEALICVGSSKKRARKASSSDDEGGPRTLGGDGHRAEEASKDKE
GTCAAGAGTGCCACCATGTCCTCCACGGAGAGCACGGCGTCTGGAATGCAGGATGTGGTCAGAGCGGTTGGCGAGGAGCAAAGGTCAGAGGAGCCAAAGCGCAGGGTGGATACTTCAGTGTCTTGGGAGGCGTTGATTTGTGTCGGATCGTCCAAGAAGAGTGCGAGGAAGGCATCCTCTTCAGATGATGAAGGAGGGCCAAGAACACTGGGAGGGGATGGCCACAGAGCGGAGGAGGCTAGCAAAGACAAAGAAG	GTCAAGAGTGCCACCATGTCCTCCACGGAGAGCACGGCGTCTGGAATGCAGGATGTGGTCAGAGCGGTTGGCGAGGAGCAAAGGTCAGAGGAGCCAAAGCGCAGGGTGGATACTTCAGTGTCTTGGGAGGCGTTGATTTGTGTCGGATCGTCCAAGAAGAGTGCGAGGAAGGCATCCTCTTCAGATGATGAAGGAGGGCCAAGAACACTGGGAGGGGATGGCCACAGAGCGGAGGAGGCTAGCAAAGACAAAGAAG	1	3 Base Changes	VKSATMSSTESTASGMQDVVRAVGEEQRSEEPKRRVDTSVSWEALICVGSSKKSARKASSSDDEGGPRTLGGDGHRAEEASKDKE	VKSATLSSTESTASGMQDEVRAVGEEQRSEEPKRRVDTSVSWEALICVGSSKKRARKASSSDDEGGPRTLGGDGHRAEEASKDKE
GTCAAGAGTGCCACCATGTCCTCCACGGAGAGCACGGCGTCTGGAATGCAGGTTGAGGTCAGAGCGGTTGGCGAGGAGCAAAGGTCAGAGGAGCCAAAGCGCAGGGTGGATACTTCAGTGTCTTGGGAGGCGTTGATTTGTGTCGGATCGTCCAAGAAGAGAGCGAGGAAGGCATCCTCTTCAGATGATGAAGGAGGGCCAAGAACACTGGGAGGGGATGGCCACAGAGCGGAGGAGGCTAGCAAAGACAAAGAAG	GTCAAGAGTGCCACCATGTCCTCCACGGAGAGCACGGCGTCTGGAATGCAGGTTGAGGTCAGAGCGGTTGGCGAGGAGCAAAGGTCAGAGGAGCCAAAGCGCAGGGTGGATACTTCAGTGTCTTGGGAGGCGTTGATTTGTGTCGGATCGTCCAAGAAGAGAGCGAGGAAGGCATCCTCTTCAGATGATGAAGGAGGGCCAAGAACACTGGGAGGGGATGGCCACAGAGCGGAGGAGGCTAGCAAAGACAAAGAAG	1	2 Base Changes	VKSATMSSTESTASGMQVEVRAVGEEQRSEEPKRRVDTSVSWEALICVGSSKKRARKASSSDDEGGPRTLGGDGHRAEEASKDKE	VKSATLSSTESTASGMQDEVRAVGEEQRSEEPKRRVDTSVSWEALICVGSSKKRARKASSSDDEGGPRTLGGDGHRAEEASKDKE
GTCAAGAGTGCCACCATGTCCTCCACGGAGAGCACGGCGTCTGGAATGCATGATGAGGTCAGAGCGGTTGGCGAGGAGCAAAGGTCAGAGGAGCAAAAGCGCAGGGTGGATACTTCAGTGTCTTGGGAGGCGATGATTTGTGTCGGATCGTCCAAGAAGAGAGCGAGGAAGGCATCCTCTTCAGATGATGAAGGAGGGCCAAGAACACTGGGAGGGGATGGCCACAGAGCGGAGGAGGTTAGCAAAGACAAAGAAG	GTCAAGAGTGCCACCATGTCCTCCACGGAGAGCACGGCGTCTGGAATGCATGATGAGGTCAGAGCGGTTGGCGAGGAGCAAAGGTCAGAGGAGCAAAAGCGCAGGGTGGATACTTCAGTGTCTTGGGAGGCGATGATTTGTGTCGGATCGTCCAAGAAGAGAGCGAGGAAGGCATCCTCTTCAGATGATGAAGGAGGGCCAAGAACACTGGGAGGGGATGGCCACAGAGCGGAGGAGGTTAGCAAAGACAAAGAAG	1	5 Base Changes	VKSATMSSTESTASGMHDEVRAVGEEQRSEEQKRRVDTSVSWEAMICVGSSKKRARKASSSDDEGGPRTLGGDGHRAEEVSKDKE	VKSATLSSTESTASGMQDEVRAVGEEQRSEEPKRRVDTSVSWEALICVGSSKKRARKASSSDDEGGPRTLGGDGHRAEEASKDKE
GTCAAGAGTGCCACCATGTCCTCCACGGAGAGCACGGCGTCTGGAATTCAGGATGAGGTCAGAGCGGTTGGCGAGGAGCAAAGGTCAGAGGAGCCAAAGCGCAGGGTGGATACTTCAGTGTCTTGGGAGGCGTTGATTTGTGTCGGATCTTCCAAGAAGAGAGCGAGGAAGGAATCCTCTTCAGATGATGAAGGAGGTCCAATAACACTGGGAGGGGATGGCCACAGAGCGGAGGAGGCTAGCAAAGACAAAGAAG	GTCAAGAGTGCCACCATGTCCTCCACGGAGAGCACGGCGTCTGGAATTCAGGATGAGGTCAGAGCGGTTGGCGAGGAGCAAAGGTCAGAGGAGCCAAAGCGCAGGGTGGATACTTCAGTGTCTTGGGAGGCGTTGATTTGTGTCGGATCTTCCAAGAAGAGAGCGAGGAAGGAATCCTCTTCAGATGATGAAGGAGGTCCAATAACACTGGGAGGGGATGGCCACAGAGCGGAGGAGGCTAGCAAAGACAAAGAAG	1	6 Base Changes	VKSATMSSTESTASGIQDEVRAVGEEQRSEEPKRRVDTSVSWEALICVGSSKKRARKESSSDDEGGPITLGGDGHRAEEASKDKE	VKSATLSSTESTASGMQDEVRAVGEEQRSEEPKRRVDTSVSWEALICVGSSKKRARKASSSDDEGGPRTLGGDGHRAEEASKDKE
GTCAAGAGTGCCACCATGTCCTCCACGGAGAGCACGGCGTCTGGAATTCAGGATGAGGTCAGAGCGGTTGGCGAGGAGCAAAGGTCAGAGGAGCCAAAGCGCAGGGTGGATGCTTCAGTGTCTTGGGAGGCGTTGATTTGTGTCGGATCGTCCAAGAAGAGAGCGAGGAAGGCATCCTCTTCAGATGATGAAGGAGGGCCAAGAACACTGGGAGGGGATGGCCACAGAGCGGAGGAGGCTAGCAAAGACAAAGAAG	GTCAAGAGTGCCACCATGTCCTCCACGGAGAGCACGGCGTCTGGAATTCAGGATGAGGTCAGAGCGGTTGGCGAGGAGCAAAGGTCAGAGGAGCCAAAGCGCAGGGTGGATGCTTCAGTGTCTTGGGAGGCGTTGATTTGTGTCGGATCGTCCAAGAAGAGAGCGAGGAAGGCATCCTCTTCAGATGATGAAGGAGGGCCAAGAACACTGGGAGGGGATGGCCACAGAGCGGAGGAGGCTAGCAAAGACAAAGAAG	1	3 Base Changes	VKSATMSSTESTASGIQDEVRAVGEEQRSEEPKRRVDASVSWEALICVGSSKKRARKASSSDDEGGPRTLGGDGHRAEEASKDKE	VKSATLSSTESTASGMQDEVRAVGEEQRSEEPKRRVDTSVSWEALICVGSSKKRARKASSSDDEGGPRTLGGDGHRAEEASKDKE
GTCAAGAGTGCCACCATGTCCTCCACGGAGAGCACGGCGTCTGGAATTCAGGATGAGGTCAGAGCGGTTGGCGAGGATCAAAGGTCAGAGGAGCCAAAGCGCAGGGTGGATACTTCAGTGTCTTGGGAGGCGTTGATTTGTGTCGGATCGTCCAAGAAGAGAGCGAGGAAGGCATCCTCTTCAGATGATGGAGGAGGGCCAAGAACACTGGGAGGGGATGGCCACAGAGCGGAGGAGGCTAGCAAAGACAAAGAAG	GTCAAGAGTGCCACCATGTCCTCCACGGAGAGCACGGCGTCTGGAATTCAGGATGAGGTCAGAGCGGTTGGCGAGGATCAAAGGTCAGAGGAGCCAAAGCGCAGGGTGGATACTTCAGTGTCTTGGGAGGCGTTGATTTGTGTCGGATCGTCCAAGAAGAGAGCGAGGAAGGCATCCTCTTCAGATGATGGAGGAGGGCCAAGAACACTGGGAGGGGATGGCCACAGAGCGGAGGAGGCTAGCAAAGACAAAGAAG	1	4 Base Changes	VKSATMSSTESTASGIQDEVRAVGEDQRSEEPKRRVDTSVSWEALICVGSSKKRARKASSSDDGGGPRTLGGDGHRAEEASKDKE	VKSATLSSTESTASGMQDEVRAVGEEQRSEEPKRRVDTSVSWEALICVGSSKKRARKASSSDDEGGPRTLGGDGHRAEEASKDKE
GTCAAGAGTGCCACCATGTCCTCCACTGAGAGCACGGCGTCTGGAATGCAGGATGAGGTCAGAGCGGTTGGCGAGGAGCAAAGGTCAGAGGAGCCAAAGCGCAGGGTGGATACTTCAGTGTCTTGGGAGGCGTTGATTTGTGTCGGATCGTCCAAGAAGAGAGCGAGGAAGGCATCCTCTTCAGATGATGAAGGAGGGCCAAGAACACTGGGAGGGGATGGCCACAGAGCGGAGGAGGCTAGCAAAGACAAAGAAG	GTCAAGAGTGCCACCATGTCCTCCACTGAGAGCACGGCGTCTGGAATGCAGGATGAGGTCAGAGCGGTTGGCGAGGAGCAAAGGTCAGAGGAGCCAAAGCGCAGGGTGGATACTTCAGTGTCTTGGGAGGCGTTGATTTGTGTCGGATCGTCCAAGAAGAGAGCGAGGAAGGCATCCTCTTCAGATGATGAAGGAGGGCCAAGAACACTGGGAGGGGATGGCCACAGAGCGGAGGAGGCTAGCAAAGACAAAGAAG	1	2 Base Changes	VKSATMSSTESTASGMQDEVRAVGEEQRSEEPKRRVDTSVSWEALICVGSSKKRARKASSSDDEGGPRTLGGDGHRAEEASKDKE	VKSATLSSTESTASGMQDEVRAVGEEQRSEEPKRRVDTSVSWEALICVGSSKKRARKASSSDDEGGPRTLGGDGHRAEEASKDKE
GTCAAGAGTGCCACCATTTACTACACGGAGATCACGGCGTCTGGAATGCAGTATGAGGTCAGAGCGGTTGGCGAGGAGCAAAGGTCAGAGGATCCTAAGCGCGGGGTGGATACTTCTGTGTCTTGGGAGGCGTTGATTTGTGTCGGATCGTCCAAGAAGAGATCGAGGAAGGCATCCTCTTCAGATGATGAAGGAGGGCCAAGAACACTGGGAGGGGATGGCCACAGATCGGAGTAGGCTAGCAAAGACAAAGAAG	GTCAAGAGTGCCACCATTTACTACACGGAGATCACGGCGTCTGGAATGCAGTATGAGGTCAGAGCGGTTGGCGAGGAGCAAAGGTCAGAGGATCCTAAGCGCGGGGTGGATACTTCTGTGTCTTGGGAGGCGTTGATTTGTGTCGGATCGTCCAAGAAGAGATCGAGGAAGGCATCCTCTTCAGATGATGAAGGAGGGCCAAGAACACTGGGAGGGGATGGCCACAGATCGGAGTAGGCTAGCAAAGACAAAGAAG	1	13 Base Changes	VKSATIYYTEITASGMQYEVRAVGEEQRSEDPKRGVDTSVSWEALICVGSSKKRSRKASSSDDEGGPRTLGGDGHRSE*	VKSATLSSTESTASGMQDEVRAVGEEQRSEEPKRRVDTSVSWEALICVGSSKKRARKASSSDDEGGPRTLGGDGHRAEEASKDKE
GTCAAGAGTGCCACCATTTCCTCCACGTAGAGCACGGCGTCTGGAATCCAGGAAGAGGTCAGAGCGGTTGGCGAGCAGCAAAGGTAAGAGGACCCCAAGCGCACGGTGGATACTACAGTGTCTTGGGAGGCGTTGATTTGTGTCGGATCGTCCAAGAAGAGAGCGAGGAAGGCATCCTCTTCAGATGATGAAGGAGGGCCAATAACACTGGGAGGGGATGGCCACAGAGCGGAGGAGGCTAGCATAGAAAAAGAAG	GTCAAGAGTGCCACCATTTCCTCCACGTAGAGCACGGCGTCTGGAATCCAGGAAGAGGTCAGAGCGGTTGGCGAGCAGCAAAGGTAAGAGGACCCCAAGCGCACGGTGGATACTACAGTGTCTTGGGAGGCGTTGATTTGTGTCGGATCGTCCAAGAAGAGAGCGAGGAAGGCATCCTCTTCAGATGATGAAGGAGGGCCAATAACACTGGGAGGGGATGGCCACAGAGCGGAGGAGGCTAGCATAGAAAAAGAAG	1	14 Base Changes	VKSATISST*	VKSATLSSTESTASGMQDEVRAVGEEQRSEEPKRRVDTSVSWEALICVGSSKKRARKASSSDDEGGPRTLGGDGHRAEEASKDKE
GTCAAGAGTGCCACCCCGTCCTCCACGGAGAGCACGGCGTCTGGAATGCAGGATGAGGTCAGAGCGGTTGGCGAGGAGCAAAGGTCAGAGGAGCCAAAGCGCAGGGTGGATACTTCAGTGTCTTGGGAGGCGTTGATTTGTGTCGGATCGTCCAAGAAGAGAGCGAGGAAGGCATCCTCTTCAGATGATGAAGGAGGGCCAAGAACACTGGGAGGGGATGGCCACAGAGCGGAGGAGGCTAGCAAAGACAAAGAAG	GTCAAGAGTGCCACCCCGTCCTCCACGGAGAGCACGGCGTCTGGAATGCAGGATGAGGTCAGAGCGGTTGGCGAGGAGCAAAGGTCAGAGGAGCCAAAGCGCAGGGTGGATACTTCAGTGTCTTGGGAGGCGTTGATTTGTGTCGGATCGTCCAAGAAGAGAGCGAGGAAGGCATCCTCTTCAGATGATGAAGGAGGGCCAAGAACACTGGGAGGGGATGGCCACAGAGCGGAGGAGGCTAGCAAAGACAAAGAAG	1	2 Base Changes	VKSATPSSTESTASGMQDEVRAVGEEQRSEEPKRRVDTSVSWEALICVGSSKKRARKASSSDDEGGPRTLGGDGHRAEEASKDKE	VKSATLSSTESTASGMQDEVRAVGEEQRSEEPKRRVDTSVSWEALICVGSSKKRARKASSSDDEGGPRTLGGDGHRAEEASKDKE
GTCAAGAGTGCCACCCTGTCCACCACGGAGAGCACGGCGTCTGGAATGCAGGATGAGGTCAGAGCGGTTGGCGAGGAGCAAAGGTCAGAGGAGCCAAAGCGCAGGGTGGATACTTCAGTGTCTTGGGAGGCGTTGATTTGTGTCGGATCGTCCAAGAAGAGAGCGAGGAAGGCATCCTCTTCAGATGATGAAGGAGGGCCAAGAACACTGGGAGGGGATGGCCACAGAGCGGAGGAGGCTAGCAAAGACAAAGAAG	GTCAAGAGTGCCACCCTGTCCACCACGGAGAGCACGGCGTCTGGAATGCAGGATGAGGTCAGAGCGGTTGGCGAGGAGCAAAGGTCAGAGGAGCCAAAGCGCAGGGTGGATACTTCAGTGTCTTGGGAGGCGTTGATTTGTGTCGGATCGTCCAAGAAGAGAGCGAGGAAGGCATCCTCTTCAGATGATGAAGGAGGGCCAAGAACACTGGGAGGGGATGGCCACAGAGCGGAGGAGGCTAGCAAAGACAAAGAAG	1	2 Base Changes	VKSATLSTTESTASGMQDEVRAVGEEQRSEEPKRRVDTSVSWEALICVGSSKKRARKASSSDDEGGPRTLGGDGHRAEEASKDKE	VKSATLSSTESTASGMQDEVRAVGEEQRSEEPKRRVDTSVSWEALICVGSSKKRARKASSSDDEGGPRTLGGDGHRAEEASKDKE
GTCAAGAGTGCCACCCTGTCCCCCACGGAGAGCACGGCGTCTGGAATGCAGGATGAGGTCAGAGCGGTTGGCGAGGAGCAAAGGTCAGAGGAGCCAAAGCGCAGGGTGGATACTTCAGTGTCTTGGGAGGCGTTGATTTGTGTCGGATCGTCCAAGAAGAGAGCGAGGAAGGCATCCTCTTCAGATGATGAAGGAGGGCCAAGAACACTGGGAGGGGATGGCCACAGAGCGGAGGAGGCTAGCAAAGACAAAGAAG	GTCAAGAGTGCCACCCTGTCCCCCACGGAGAGCACGGCGTCTGGAATGCAGGATGAGGTCAGAGCGGTTGGCGAGGAGCAAAGGTCAGAGGAGCCAAAGCGCAGGGTGGATACTTCAGTGTCTTGGGAGGCGTTGATTTGTGTCGGATCGTCCAAGAAGAGAGCGAGGAAGGCATCCTCTTCAGATGATGAAGGAGGGCCAAGAACACTGGGAGGGGATGGCCACAGAGCGGAGGAGGCTAGCAAAGACAAAGAAG	1	2 Base Changes	VKSATLSPTESTASGMQDEVRAVGEEQRSEEPKRRVDTSVSWEALICVGSSKKRARKASSSDDEGGPRTLGGDGHRAEEASKDKE	VKSATLSSTESTASGMQDEVRAVGEEQRSEEPKRRVDTSVSWEALICVGSSKKRARKASSSDDEGGPRTLGGDGHRAEEASKDKE
GTCAAGAGTGCCACCCTGTCCTCCACGGAGAGCACGGCATCTGGAATGCAGGATGAGGTCAGAGCGGTTGGCGAGGAGCAAAGGTCAGAGGAGCCAAAGCGCAGGGTGGATACTTCAGTGTCTTGGGAGGCGTTGATTTGTGTCGGATCGTCCAAGAAGAGAGCGAGGAAGGCATCCTCTTCAGATGATGAAGGAGGGCCAAGAACACTGGGAGGGGATGGCCACAGAGCGGAGGAGGCTAGCAAAGACAAAGAAG	GTCAAGAGTGCCACCCTGTCCTCCACGGAGAGCACGGCATCTGGAATGCAGGATGAGGTCAGAGCGGTTGGCGAGGAGCAAAGGTCAGAGGAGCCAAAGCGCAGGGTGGATACTTCAGTGTCTTGGGAGGCGTTGATTTGTGTCGGATCGTCCAAGAAGAGAGCGAGGAAGGCATCCTCTTCAGATGATGAAGGAGGGCCAAGAACACTGGGAGGGGATGGCCACAGAGCGGAGGAGGCTAGCAAAGACAAAGAAG	1	2 Base Changes	VKSATLSSTESTASGMQDEVRAVGEEQRSEEPKRRVDTSVSWEALICVGSSKKRARKASSSDDEGGPRTLGGDGHRAEEASKDKE	VKSATLSSTESTASGMQDEVRAVGEEQRSEEPKRRVDTSVSWEALICVGSSKKRARKASSSDDEGGPRTLGGDGHRAEEASKDKE
GTCAAGAGTGCCACCCTGTCCTCCACGGAGAGCACGGCGCCTGGAATGCAGGATGAGGTCAGAGCGGTTGGCGAGGAGCAAAGGTCAGAGGAGCCAAAGCGCAGGGTGGATACTTCAGTGTCTTGGGAGGCGTTGATTTGTGTCGGATCGTCCAAGAAGAGAGCGAGGAAGGCATCCTCTTCAGATGATGAAGAAGGGCCAAGAACACTGGGAGGGGATGGCCACAGAGCGGAGGAGGCTAGCAAAGACAAAGAAG	GTCAAGAGTGCCACCCTGTCCTCCACGGAGAGCACGGCGCCTGGAATGCAGGATGAGGTCAGAGCGGTTGGCGAGGAGCAAAGGTCAGAGGAGCCAAAGCGCAGGGTGGATACTTCAGTGTCTTGGGAGGCGTTGATTTGTGTCGGATCGTCCAAGAAGAGAGCGAGGAAGGCATCCTCTTCAGATGATGAAGAAGGGCCAAGAACACTGGGAGGGGATGGCCACAGAGCGGAGGAGGCTAGCAAAGACAAAGAAG	1	3 Base Changes	VKSATLSSTESTAPGMQDEVRAVGEEQRSEEPKRRVDTSVSWEALICVGSSKKRARKASSSDDEEGPRTLGGDGHRAEEASKDKE	VKSATLSSTESTASGMQDEVRAVGEEQRSEEPKRRVDTSVSWEALICVGSSKKRARKASSSDDEGGPRTLGGDGHRAEEASKDKE
GTCAAGAGTGCCACCCTGTCCTCCACGGAGAGCACGGCGTCCGGAATGCAGGATGAGGTCAGAGCGGTTGGCGAGGAGCAAAGGTCAGAGGAGCCAAAGCGCAGGGTGGATACTTCAGTGTCTTGGGAGGCGTTGATTTGTGTCGGATCGTCCAAGAAGAGAGCGAGGAAGGCATCCTCTTCAGATGATGAAGGAGGGCCAAGAACACTGGGAGGGGATGGCCACAGAGCGGAGGAGGCTAGCAAAGACAAAGAAG	GTCAAGAGTGCCACCCTGTCCTCCACGGAGAGCACGGCGTCCGGAATGCAGGATGAGGTCAGAGCGGTTGGCGAGGAGCAAAGGTCAGAGGAGCCAAAGCGCAGGGTGGATACTTCAGTGTCTTGGGAGGCGTTGATTTGTGTCGGATCGTCCAAGAAGAGAGCGAGGAAGGCATCCTCTTCAGATGATGAAGGAGGGCCAAGAACACTGGGAGGGGATGGCCACAGAGCGGAGGAGGCTAGCAAAGACAAAGAAG	1	2 Base Changes	VKSATLSSTESTASGMQDEVRAVGEEQRSEEPKRRVDTSVSWEALICVGSSKKRARKASSSDDEGGPRTLGGDGHRAEEASKDKE	VKSATLSSTESTASGMQDEVRAVGEEQRSEEPKRRVDTSVSWEALICVGSSKKRARKASSSDDEGGPRTLGGDGHRAEEASKDKE
GTCAAGAGTGCCACCCTGTCCTCCACGGAGAGCACGGCGTCTGGAACGCAGGATGAGGTCAGAGCGGTTGGCGAGGAGCAAAGGTCAGAGGAACCAAAGCGCAGGGTGGATACTTCAGTGTCTTGGGAGGCGTTGATTTGTGTCGGATCGTCCAAGAAGAGAGCGAGGAAGGCATCCTCTTCAGATGATGAAGGAGGGCCAAGAACACTGGGAGGGGATGGCCACAGAGCGGAGGAGGCTAGCAAAGACAAAGAAG	GTCAAGAGTGCCACCCTGTCCTCCACGGAGAGCACGGCGTCTGGAACGCAGGATGAGGTCAGAGCGGTTGGCGAGGAGCAAAGGTCAGAGGAACCAAAGCGCAGGGTGGATACTTCAGTGTCTTGGGAGGCGTTGATTTGTGTCGGATCGTCCAAGAAGAGAGCGAGGAAGGCATCCTCTTCAGATGATGAAGGAGGGCCAAGAACACTGGGAGGGGATGGCCACAGAGCGGAGGAGGCTAGCAAAGACAAAGAAG	1	3 Base Changes	VKSATLSSTESTASGTQDEVRAVGEEQRSEEPKRRVDTSVSWEALICVGSSKKRARKASSSDDEGGPRTLGGDGHRAEEASKDKE	VKSATLSSTESTASGMQDEVRAVGEEQRSEEPKRRVDTSVSWEALICVGSSKKRARKASSSDDEGGPRTLGGDGHRAEEASKDKE
GTCAAGAGTGCCACCCTGTCCTCCACGGAGAGCACGGCGTCTGGAACGCAGGATGAGGTCAGAGCGGTTGGCGAGGAGCAAAGGTCAGAGGAGCCAAAGCGCAGGGTGGATACTTCAGTGTCTTGGGAGGCGTTGATTTGTGTCGGATCGTCCAAGAAGAGAGCGAGGAAGGCATCCTCTTCAGATGATGAAGGAGGGCCAAGAACACTGGGAGGGGATGGCCACAGAGCGGAGGAGGCTAGCAAAGACAAAGAAG	GTCAAGAGTGCCACCCTGTCCTCCACGGAGAGCACGGCGTCTGGAACGCAGGATGAGGTCAGAGCGGTTGGCGAGGAGCAAAGGTCAGAGGAGCCAAAGCGCAGGGTGGATACTTCAGTGTCTTGGGAGGCGTTGATTTGTGTCGGATCGTCCAAGAAGAGAGCGAGGAAGGCATCCTCTTCAGATGATGAAGGAGGGCCAAGAACACTGGGAGGGGATGGCCACAGAGCGGAGGAGGCTAGCAAAGACAAAGAAG	1	2 Base Changes	VKSATLSSTESTASGTQDEVRAVGEEQRSEEPKRRVDTSVSWEALICVGSSKKRARKASSSDDEGGPRTLGGDGHRAEEASKDKE	VKSATLSSTESTASGMQDEVRAVGEEQRSEEPKRRVDTSVSWEALICVGSSKKRARKASSSDDEGGPRTLGGDGHRAEEASKDKE
GTCAAGAGTGCCACCCTGTCCTCCACGGAGAGCACGGCGTCTGGAATGCAGGATGAGGTCAGAGCGGTTGGCGAGGAGCAAAGGTCAGAGGAGCCAAAGCGCAAGGTGGATACTTCAGTGTCTTGGGAGGCGTTGATTTGTGTCGGATCGTCCAAGAAGAGAGCGAGGAAGGCATCCTCTTCAGATGATGAAGGAGGGCCAAGAACACTGGGAGGGGATGGCCACAGAGCGGAGGAGGCTAGCAAAGACAAAGAAG	GTCAAGAGTGCCACCCTGTCCTCCACGGAGAGCACGGCGTCTGGAATGCAGGATGAGGTCAGAGCGGTTGGCGAGGAGCAAAGGTCAGAGGAGCCAAAGCGCAAGGTGGATACTTCAGTGTCTTGGGAGGCGTTGATTTGTGTCGGATCGTCCAAGAAGAGAGCGAGGAAGGCATCCTCTTCAGATGATGAAGGAGGGCCAAGAACACTGGGAGGGGATGGCCACAGAGCGGAGGAGGCTAGCAAAGACAAAGAAG	1	2 Base Changes	VKSATLSSTESTASGMQDEVRAVGEEQRSEEPKRKVDTSVSWEALICVGSSKKRARKASSSDDEGGPRTLGGDGHRAEEASKDKE	VKSATLSSTESTASGMQDEVRAVGEEQRSEEPKRRVDTSVSWEALICVGSSKKRARKASSSDDEGGPRTLGGDGHRAEEASKDKE
GTCAAGAGTGCCACCCTGTCCTCCACGGAGAGCACGGCGTCTGGAATGCAGGATGAGGTCAGAGCGGTTGGCGAGGAGCAAAGGTCAGAGGAGCCAAAGCGCAGGGTGGATACTTCAGCGTCTTGGGAGGCGTTGATTTGTGTCGGATCGTCCAAGAAGAGAGCGTGGAAGGCATCCTCTTCAGATGATGAAGGAGGGCCAAGAACACTGGGAGGGGATGGCCACAGAGCGGAGGAGGCTAGCAAAGACAAAGAAG	GTCAAGAGTGCCACCCTGTCCTCCACGGAGAGCACGGCGTCTGGAATGCAGGATGAGGTCAGAGCGGTTGGCGAGGAGCAAAGGTCAGAGGAGCCAAAGCGCAGGGTGGATACTTCAGCGTCTTGGGAGGCGTTGATTTGTGTCGGATCGTCCAAGAAGAGAGCGTGGAAGGCATCCTCTTCAGATGATGAAGGAGGGCCAAGAACACTGGGAGGGGATGGCCACAGAGCGGAGGAGGCTAGCAAAGACAAAGAAG	1	3 Base Changes	VKSATLSSTESTASGMQDEVRAVGEEQRSEEPKRRVDTSASWEALICVGSSKKRAWKASSSDDEGGPRTLGGDGHRAEEASKDKE	VKSATLSSTESTASGMQDEVRAVGEEQRSEEPKRRVDTSVSWEALICVGSSKKRARKASSSDDEGGPRTLGGDGHRAEEASKDKE
GTCAAGAGTGCCACCCTGTCCTCCACGGAGAGCACGGCGTCTGGAATGCAGGATGAGGTCAGAGCGGTTGGCGAGGAGCAAAGGTCAGAGGAGCCAAAGCGCAGGGTGGATACTTCAGTGTCTTGGGAGGCATTGATTCGTGTCGGATCGTCCAAGAAGAGAGCGAGGAAGGCATCCTCTTCAGATGATGAAGGAGGGCCAAGAACACTGGGAGGGGATGGCCACAGAGCGGAGGAGGCTAGCAAAGACAAAGAAG	GTCAAGAGTGCCACCCTGTCCTCCACGGAGAGCACGGCGTCTGGAATGCAGGATGAGGTCAGAGCGGTTGGCGAGGAGCAAAGGTCAGAGGAGCCAAAGCGCAGGGTGGATACTTCAGTGTCTTGGGAGGCATTGATTCGTGTCGGATCGTCCAAGAAGAGAGCGAGGAAGGCATCCTCTTCAGATGATGAAGGAGGGCCAAGAACACTGGGAGGGGATGGCCACAGAGCGGAGGAGGCTAGCAAAGACAAAGAAG	1	3 Base Changes	VKSATLSSTESTASGMQDEVRAVGEEQRSEEPKRRVDTSVSWEALIRVGSSKKRARKASSSDDEGGPRTLGGDGHRAEEASKDKE	VKSATLSSTESTASGMQDEVRAVGEEQRSEEPKRRVDTSVSWEALICVGSSKKRARKASSSDDEGGPRTLGGDGHRAEEASKDKE
GTCAAGAGTGCCACCCTGTCCTCCACGGAGAGCACGGCGTCTGGAATGCAGGATGAGGTCAGAGCGGTTGGCGAGGAGCAAAGGTCAGAGGAGCCAAAGCGCAGGGTGGATACTTCAGTGTCTTGGGAGGCGTTGACTTGTGTCGGATCGTCCAAGAAGAGAGCGAGGAAGGCATCCTCTTCAGATGATGAAGGAGGGCCAAGAACACTGGGAGGGGATGGCCACAGAGCGGAGGAGGCTAGCAAAGACAAAGAAG	GTCAAGAGTGCCACCCTGTCCTCCACGGAGAGCACGGCGTCTGGAATGCAGGATGAGGTCAGAGCGGTTGGCGAGGAGCAAAGGTCAGAGGAGCCAAAGCGCAGGGTGGATACTTCAGTGTCTTGGGAGGCGTTGACTTGTGTCGGATCGTCCAAGAAGAGAGCGAGGAAGGCATCCTCTTCAGATGATGAAGGAGGGCCAAGAACACTGGGAGGGGATGGCCACAGAGCGGAGGAGGCTAGCAAAGACAAAGAAG	1	2 Base Changes	VKSATLSSTESTASGMQDEVRAVGEEQRSEEPKRRVDTSVSWEALTCVGSSKKRARKASSSDDEGGPRTLGGDGHRAEEASKDKE	VKSATLSSTESTASGMQDEVRAVGEEQRSEEPKRRVDTSVSWEALICVGSSKKRARKASSSDDEGGPRTLGGDGHRAEEASKDKE
GTCAAGAGTGCCACCCTGTCCTCCACGGAGAGCACGGCGTCTGGAATGCAGGATGAGGTCAGAGCGGTTGGCGAGGAGCAAAGGTCAGAGGAGCCAAAGCGCAGGGTGGATACTTCAGTGTCTTGGGAGGCGTTGATCTGTGTCGGATCGTCCAAGAAGAGAGCGAGGAAGGCATCCTCTTCAGATGATGAAGGAGGGCCAAGAACACTGGGAGGGGATGGCCACAGAGCGGAGGAGGCTAGCAAAGACAAAGAAG	GTCAAGAGTGCCACCCTGTCCTCCACGGAGAGCACGGCGTCTGGAATGCAGGATGAGGTCAGAGCGGTTGGCGAGGAGCAAAGGTCAGAGGAGCCAAAGCGCAGGGTGGATACTTCAGTGTCTTGGGAGGCGTTGATCTGTGTCGGATCGTCCAAGAAGAGAGCGAGGAAGGCATCCTCTTCAGATGATGAAGGAGGGCCAAGAACACTGGGAGGGGATGGCCACAGAGCGGAGGAGGCTAGCAAAGACAAAGAAG	1	2 Base Changes	VKSATLSSTESTASGMQDEVRAVGEEQRSEEPKRRVDTSVSWEALICVGSSKKRARKASSSDDEGGPRTLGGDGHRAEEASKDKE	VKSATLSSTESTASGMQDEVRAVGEEQRSEEPKRRVDTSVSWEALICVGSSKKRARKASSSDDEGGPRTLGGDGHRAEEASKDKE
GTCAAGAGTGCCACCCTGTCCTCCACGGAGAGCACGGCGTCTGGAATGCAGGATGAGGTCAGAGCGGTTGGCGAGGAGCAAAGGTCAGAGGAGCCAAAGCGCAGGGTGGATACTTCAGTGTCTTGGGAGGCGTTGATTTGTGTCGGATCGTCCAAGAAGAGAGCGAGGAAGGCACCCTCTTCAGATGATGAAGGAGGGCCAAGAACACTGGGAGGGGATGGCCACAGAGCGGAGGAGGCTAGCAAAGACAAAGAAG	GTCAAGAGTGCCACCCTGTCCTCCACGGAGAGCACGGCGTCTGGAATGCAGGATGAGGTCAGAGCGGTTGGCGAGGAGCAAAGGTCAGAGGAGCCAAAGCGCAGGGTGGATACTTCAGTGTCTTGGGAGGCGTTGATTTGTGTCGGATCGTCCAAGAAGAGAGCGAGGAAGGCACCCTCTTCAGATGATGAAGGAGGGCCAAGAACACTGGGAGGGGATGGCCACAGAGCGGAGGAGGCTAGCAAAGACAAAGAAG	1	2 Base Changes	VKSATLSSTESTASGMQDEVRAVGEEQRSEEPKRRVDTSVSWEALICVGSSKKRARKAPSSDDEGGPRTLGGDGHRAEEASKDKE	VKSATLSSTESTASGMQDEVRAVGEEQRSEEPKRRVDTSVSWEALICVGSSKKRARKASSSDDEGGPRTLGGDGHRAEEASKDKE
GTCAAGAGTGCCACCCTGTCCTCCACGGAGAGCACGGCGTCTGGAATGCAGGATGAGGTCAGAGCGGTTGGCGAGGAGCAAAGGTCAGAGGAGCCAAAGCGCAGGGTGGATACTTCAGTGTCTTGGGAGGCGTTGATTTGTGTCGGATCGTCCAAGAAGAGAGCGAGGAAGGCATCCCCTTCAGATGATGAAGGAGGGCCAAGAACACTGGGAGGGGATGGCCACAGAGCGGAGGAGGCTAGCAAAGACAAAGAAG	GTCAAGAGTGCCACCCTGTCCTCCACGGAGAGCACGGCGTCTGGAATGCAGGATGAGGTCAGAGCGGTTGGCGAGGAGCAAAGGTCAGAGGAGCCAAAGCGCAGGGTGGATACTTCAGTGTCTTGGGAGGCGTTGATTTGTGTCGGATCGTCCAAGAAGAGAGCGAGGAAGGCATCCCCTTCAGATGATGAAGGAGGGCCAAGAACACTGGGAGGGGATGGCCACAGAGCGGAGGAGGCTAGCAAAGACAAAGAAG	1	2 Base Changes	VKSATLSSTESTASGMQDEVRAVGEEQRSEEPKRRVDTSVSWEALICVGSSKKRARKASPSDDEGGPRTLGGDGHRAEEASKDKE	VKSATLSSTESTASGMQDEVRAVGEEQRSEEPKRRVDTSVSWEALICVGSSKKRARKASSSDDEGGPRTLGGDGHRAEEASKDKE
GTCAAGAGTGCCACCCTGTCCTCCACGGAGAGCACGGCGTCTGGAATGCAGGATGAGGTCAGAGCGGTTGGCGAGGAGCAAAGGTCAGAGGAGCCAAAGCGCAGGGTGGATACTTCAGTGTCTTGGGAGGCGTTGATTTGTGTCGGATCGTCCAAGAAGAGAGCGAGGAAGGCATCCTCTTCAGAGGATGAAGGAGGGCCAAGAACACTGGGAGGGGATGGCCACAGAGCGGAGGAGGCTAGCAAAGACAAAGAAG	GTCAAGAGTGCCACCCTGTCCTCCACGGAGAGCACGGCGTCTGGAATGCAGGATGAGGTCAGAGCGGTTGGCGAGGAGCAAAGGTCAGAGGAGCCAAAGCGCAGGGTGGATACTTCAGTGTCTTGGGAGGCGTTGATTTGTGTCGGATCGTCCAAGAAGAGAGCGAGGAAGGCATCCTCTTCAGAGGATGAAGGAGGGCCAAGAACACTGGGAGGGGATGGCCACAGAGCGGAGGAGGCTAGCAAAGACAAAGAAG	1	2 Base Changes	VKSATLSSTESTASGMQDEVRAVGEEQRSEEPKRRVDTSVSWEALICVGSSKKRARKASSSEDEGGPRTLGGDGHRAEEASKDKE	VKSATLSSTESTASGMQDEVRAVGEEQRSEEPKRRVDTSVSWEALICVGSSKKRARKASSSDDEGGPRTLGGDGHRAEEASKDKE
GTCAAGAGTGCCACCCTGTCCTCCACGGAGAGCACGGCGTCTGGAATGCAGGATGAGGTCAGAGCGGTTGGCGAGGAGCAAAGGTCAGAGGAGCCAAAGCGCAGGGTGGATACTTCAGTGTCTTGGGAGGCGTTGATTTGTGTCGGATCGTCCAAGAAGAGAGCGAGGAAGGCATCCTCTTCAGATGATGAAGGAGGGCCAAGAACACTGGGAGGGGATGACCACAGAGCGGAGGAGGCTAGCAAAGACAAAGAAG	GTCAAGAGTGCCACCCTGTCCTCCACGGAGAGCACGGCGTCTGGAATGCAGGATGAGGTCAGAGCGGTTGGCGAGGAGCAAAGGTCAGAGGAGCCAAAGCGCAGGGTGGATACTTCAGTGTCTTGGGAGGCGTTGATTTGTGTCGGATCGTCCAAGAAGAGAGCGAGGAAGGCATCCTCTTCAGATGATGAAGGAGGGCCAAGAACACTGGGAGGGGATGACCACAGAGCGGAGGAGGCTAGCAAAGACAAAGAAG	1	2 Base Changes	VKSATLSSTESTASGMQDEVRAVGEEQRSEEPKRRVDTSVSWEALICVGSSKKRARKASSSDDEGGPRTLGGDDHRAEEASKDKE	VKSATLSSTESTASGMQDEVRAVGEEQRSEEPKRRVDTSVSWEALICVGSSKKRARKASSSDDEGGPRTLGGDGHRAEEASKDKE
GTCAAGAGTGCCACCCTGTCCTCCACGGAGAGCACGGCGTCTGGAATGCAGGATGAGGTCAGAGCGGTTGGCGAGGAGCAAAGGTCAGAGGAGCCAAAGCGCAGGGTGGATACTTCAGTGTCTTGGGAGGCGTTGATTTGTGTCGGATCGTCCAAGAAGAGAGCGAGGAAGGCATCCTCTTCAGATGATGAAGGAGGGCCAAGAACACTGGGAGGGGATGGCCACAGAGCAGAGGAGGCTAGCAAAGACAAAGAAG	GTCAAGAGTGCCACCCTGTCCTCCACGGAGAGCACGGCGTCTGGAATGCAGGATGAGGTCAGAGCGGTTGGCGAGGAGCAAAGGTCAGAGGAGCCAAAGCGCAGGGTGGATACTTCAGTGTCTTGGGAGGCGTTGATTTGTGTCGGATCGTCCAAGAAGAGAGCGAGGAAGGCATCCTCTTCAGATGATGAAGGAGGGCCAAGAACACTGGGAGGGGATGGCCACAGAGCAGAGGAGGCTAGCAAAGACAAAGAAG	1	2 Base Changes	VKSATLSSTESTASGMQDEVRAVGEEQRSEEPKRRVDTSVSWEALICVGSSKKRARKASSSDDEGGPRTLGGDGHRAEEASKDKE	VKSATLSSTESTASGMQDEVRAVGEEQRSEEPKRRVDTSVSWEALICVGSSKKRARKASSSDDEGGPRTLGGDGHRAEEASKDKE
GTCAAGAGTGCCACCCTGTCCTCCACGGAGAGCACGGCGTCTGGAATGCAGGATGAGGTCAGAGCGGTTGGCGAGGAGCAAAGGTCAGAGGAGCCAAAGCGCAGGGTGGATACTTCAGTGTCTTGGGAGGCGTTGATTTGTGTCGGATCGTCCAAGAAGAGAGCGAGGAAGGCATCCTCTTCAGATGATGAAGGAGGGCCAAGAACACTGGGAGGGGATGGCCACAGAGCGGAGGAGACTAGCAAAGACAAAGAAG	GTCAAGAGTGCCACCCTGTCCTCCACGGAGAGCACGGCGTCTGGAATGCAGGATGAGGTCAGAGCGGTTGGCGAGGAGCAAAGGTCAGAGGAGCCAAAGCGCAGGGTGGATACTTCAGTGTCTTGGGAGGCGTTGATTTGTGTCGGATCGTCCAAGAAGAGAGCGAGGAAGGCATCCTCTTCAGATGATGAAGGAGGGCCAAGAACACTGGGAGGGGATGGCCACAGAGCGGAGGAGACTAGCAAAGACAAAGAAG	1	2 Base Changes	VKSATLSSTESTASGMQDEVRAVGEEQRSEEPKRRVDTSVSWEALICVGSSKKRARKASSSDDEGGPRTLGGDGHRAEETSKDKE	VKSATLSSTESTASGMQDEVRAVGEEQRSEEPKRRVDTSVSWEALICVGSSKKRARKASSSDDEGGPRTLGGDGHRAEEASKDKE
GTCAAGAGTGCCACCCTGTCCTCCACGGAGAGCACGGCGTCTGGAATGCAGGATGAGGTCAGAGCGGTTGGCGAGGAGCAAAGGTCAGAGGAGCCAAAGCGCAGGGTGGATACTTCAGTGTCTTGGGAGGCGTTGATTTGTGTCGGATCGTCCAAGAAGAGAGCGAGGAAGGCATCCTCTTCAGATGATGAAGGAGGGCCAAGAACACTGGGAGGGGATGGCCACAGAGCGGAGGAGGCTAGAATAGACAAAGAAG	GTCAAGAGTGCCACCCTGTCCTCCACGGAGAGCACGGCGTCTGGAATGCAGGATGAGGTCAGAGCGGTTGGCGAGGAGCAAAGGTCAGAGGAGCCAAAGCGCAGGGTGGATACTTCAGTGTCTTGGGAGGCGTTGATTTGTGTCGGATCGTCCAAGAAGAGAGCGAGGAAGGCATCCTCTTCAGATGATGAAGGAGGGCCAAGAACACTGGGAGGGGATGGCCACAGAGCGGAGGAGGCTAGAATAGACAAAGAAG	1	3 Base Changes	VKSATLSSTESTASGMQDEVRAVGEEQRSEEPKRRVDTSVSWEALICVGSSKKRARKASSSDDEGGPRTLGGDGHRAEEARIDKE	VKSATLSSTESTASGMQDEVRAVGEEQRSEEPKRRVDTSVSWEALICVGSSKKRARKASSSDDEGGPRTLGGDGHRAEEASKDKE
GTCAAGAGTGCCACCCTGTCCTCCACGGAGAGCACGGCGTCTGGAATGCAGGATGAGGTCAGAGCGGTTGGCGAGGAGCAAAGGTCAGAGGAGCCAAAGCGCAGGGTGGATACTTCAGTGTCTTGGGAGGCGTTGATTTGTGTCGGATCGTCCAAGAAGAGAGCGAGGAAGGCATCCTCTTCAGATGATGAAGGAGGGCCAAGAACACTGGGAGGGGATGGCCACAGAGCGGAGGAGGCTAGCACAGACAAAGAAG	GTCAAGAGTGCCACCCTGTCCTCCACGGAGAGCACGGCGTCTGGAATGCAGGATGAGGTCAGAGCGGTTGGCGAGGAGCAAAGGTCAGAGGAGCCAAAGCGCAGGGTGGATACTTCAGTGTCTTGGGAGGCGTTGATTTGTGTCGGATCGTCCAAGAAGAGAGCGAGGAAGGCATCCTCTTCAGATGATGAAGGAGGGCCAAGAACACTGGGAGGGGATGGCCACAGAGCGGAGGAGGCTAGCACAGACAAAGAAG	1	2 Base Changes	VKSATLSSTESTASGMQDEVRAVGEEQRSEEPKRRVDTSVSWEALICVGSSKKRARKASSSDDEGGPRTLGGDGHRAEEASTDKE	VKSATLSSTESTASGMQDEVRAVGEEQRSEEPKRRVDTSVSWEALICVGSSKKRARKASSSDDEGGPRTLGGDGHRAEEASKDKE
GTCAAGAGTGCCACCCTGTCCTCCACGGAGAGCACGGCGTCTGGAATGCAGGATGAGGTCAGAGCGGTTGGCGAGGAGCAAAGGTCAGAGGAGCCAAAGCGCAGGGTGGATACTTCAGTGTCTTGGGAGGCGTTGATTTGTGTCGGATCGTCCAAGAAGAGAGCGAGGAAGGCATCCTCTTCAGATGATGAAGGAGGGCCAAGAACACTGGGAGGGGATGGCCACAGAGCGGGGGAGGCTAGCAAAGACAAAGAAG	GTCAAGAGTGCCACCCTGTCCTCCACGGAGAGCACGGCGTCTGGAATGCAGGATGAGGTCAGAGCGGTTGGCGAGGAGCAAAGGTCAGAGGAGCCAAAGCGCAGGGTGGATACTTCAGTGTCTTGGGAGGCGTTGATTTGTGTCGGATCGTCCAAGAAGAGAGCGAGGAAGGCATCCTCTTCAGATGATGAAGGAGGGCCAAGAACACTGGGAGGGGATGGCCACAGAGCGGGGGAGGCTAGCAAAGACAAAGAAG	1	2 Base Changes	VKSATLSSTESTASGMQDEVRAVGEEQRSEEPKRRVDTSVSWEALICVGSSKKRARKASSSDDEGGPRTLGGDGHRAGEASKDKE	VKSATLSSTESTASGMQDEVRAVGEEQRSEEPKRRVDTSVSWEALICVGSSKKRARKASSSDDEGGPRTLGGDGHRAEEASKDKE
GTCAAGAGTGCCACCCTGTCCTCCACGGAGAGCACGGCGTCTGGAATGCAGGATGAGGTCAGAGCGGTTGGCGAGGAGCAAAGGTCAGAGGAGCCAAAGCGCAGGGTGGATACTTCAGTGTCTTGGGAGGCGTTGATTTGTGTCGGATCGTCCAAGAAGAGAGCGAGGAAGGCATCCTCTTCAGATGATGAAGGAGGGCCAAGAACACTGGGAGGGGATGGCCACAGGGCGGAGGAGGCTAGCAAAGACAAAGAAG	GTCAAGAGTGCCACCCTGTCCTCCACGGAGAGCACGGCGTCTGGAATGCAGGATGAGGTCAGAGCGGTTGGCGAGGAGCAAAGGTCAGAGGAGCCAAAGCGCAGGGTGGATACTTCAGTGTCTTGGGAGGCGTTGATTTGTGTCGGATCGTCCAAGAAGAGAGCGAGGAAGGCATCCTCTTCAGATGATGAAGGAGGGCCAAGAACACTGGGAGGGGATGGCCACAGGGCGGAGGAGGCTAGCAAAGACAAAGAAG	1	2 Base Changes	VKSATLSSTESTASGMQDEVRAVGEEQRSEEPKRRVDTSVSWEALICVGSSKKRARKASSSDDEGGPRTLGGDGHRAEEASKDKE	VKSATLSSTESTASGMQDEVRAVGEEQRSEEPKRRVDTSVSWEALICVGSSKKRARKASSSDDEGGPRTLGGDGHRAEEASKDKE
GTCAAGAGTGCCACCCTGTCCTCCACGGAGAGCACGGCGTCTGGAATGCAGGATGAGGTCAGAGCGGTTGGCGAGGAGCAAAGGTCAGAGGAGCCAAAGCGCAGGGTGGATACTTCAGTGTCTTGGGAGGCGTTGATTTGTGTCGGATCGTCCAAGAAGAGAGCGAGGAAGGCATCCTCTTCAGATGATGAAGGAGGGCCAAGAACACTGGGAGGGGATGGTCACAGAGCGGAGGAGGCTAGCAAAGACAAAGAAG	GTCAAGAGTGCCACCCTGTCCTCCACGGAGAGCACGGCGTCTGGAATGCAGGATGAGGTCAGAGCGGTTGGCGAGGAGCAAAGGTCAGAGGAGCCAAAGCGCAGGGTGGATACTTCAGTGTCTTGGGAGGCGTTGATTTGTGTCGGATCGTCCAAGAAGAGAGCGAGGAAGGCATCCTCTTCAGATGATGAAGGAGGGCCAAGAACACTGGGAGGGGATGGTCACAGAGCGGAGGAGGCTAGCAAAGACAAAGAAG	1	2 Base Changes	VKSATLSSTESTASGMQDEVRAVGEEQRSEEPKRRVDTSVSWEALICVGSSKKRARKASSSDDEGGPRTLGGDGHRAEEASKDKE	VKSATLSSTESTASGMQDEVRAVGEEQRSEEPKRRVDTSVSWEALICVGSSKKRARKASSSDDEGGPRTLGGDGHRAEEASKDKE
GTCAAGAGTGCCACCCTGTCCTCCACGGAGAGCACGGCGTCTGGAATGCAGGATGAGGTCAGAGCGGTTGGCGAGGAGCAAAGGTCAGAGGAGCCAAAGCGCAGGGTGGATACTTCAGTGTCTTGGGAGGCGTTGATTTGTGTCGGATCGTCCAAGAAGAGAGCGAGGAAGGCATCCTCTTCAGATGATGAAGGAGGGCCAAGAACACTGGGGGGGGATGGCCACAGAGCGGAGGAGGCTAGCAAAGACAAAGAAG	GTCAAGAGTGCCACCCTGTCCTCCACGGAGAGCACGGCGTCTGGAATGCAGGATGAGGTCAGAGCGGTTGGCGAGGAGCAAAGGTCAGAGGAGCCAAAGCGCAGGGTGGATACTTCAGTGTCTTGGGAGGCGTTGATTTGTGTCGGATCGTCCAAGAAGAGAGCGAGGAAGGCATCCTCTTCAGATGATGAAGGAGGGCCAAGAACACTGGGGGGGGATGGCCACAGAGCGGAGGAGGCTAGCAAAGACAAAGAAG	1	2 Base Changes	VKSATLSSTESTASGMQDEVRAVGEEQRSEEPKRRVDTSVSWEALICVGSSKKRARKASSSDDEGGPRTLGGDGHRAEEASKDKE	VKSATLSSTESTASGMQDEVRAVGEEQRSEEPKRRVDTSVSWEALICVGSSKKRARKASSSDDEGGPRTLGGDGHRAEEASKDKE
GTCAAGAGTGCCACCCTGTCCTCCACGGAGAGCACGGCGTCTGGAATGCAGGATGAGGTCAGAGCGGTTGGCGAGGAGCAAAGGTCAGAGGAGCCAAAGCGCAGGGTGGATACTTCAGTGTCTTGGGAGGCGTTGATTTGTGTCGGATCGTCCAAGAAGAGAGCGAGGAAGGCATCCTCTTCAGATGATGAAGGAGGGCCGAGAACACTGGGAGGGGATGGCCACAGAGCGGAGGAGGCTAGCAAAGACAAAGAAG	GTCAAGAGTGCCACCCTGTCCTCCACGGAGAGCACGGCGTCTGGAATGCAGGATGAGGTCAGAGCGGTTGGCGAGGAGCAAAGGTCAGAGGAGCCAAAGCGCAGGGTGGATACTTCAGTGTCTTGGGAGGCGTTGATTTGTGTCGGATCGTCCAAGAAGAGAGCGAGGAAGGCATCCTCTTCAGATGATGAAGGAGGGCCGAGAACACTGGGAGGGGATGGCCACAGAGCGGAGGAGGCTAGCAAAGACAAAGAAG	1	2 Base Changes	VKSATLSSTESTASGMQDEVRAVGEEQRSEEPKRRVDTSVSWEALICVGSSKKRARKASSSDDEGGPRTLGGDGHRAEEASKDKE	VKSATLSSTESTASGMQDEVRAVGEEQRSEEPKRRVDTSVSWEALICVGSSKKRARKASSSDDEGGPRTLGGDGHRAEEASKDKE
GTCAAGAGTGCCACCCTGTCCTCCACGGAGAGCACGGCGTCTGGAATGCAGGATGAGGTCAGAGCGGTTGGCGAGGAGCAAAGGTCAGAGGAGCCAAAGCGCAGGGTGGATACTTCAGTGTCTTGGGAGGCGTTGATTTGTGTCGGATCGTCCAAGAAGAGAGCGAGGAAGGCATCCTCTTCAGGTGATGAAGGAGGGCCAAGAACACTGGGAGGGGATGGCCACAGAGCGGAGGAGGCTAGCAAAGACAAAGAAG	GTCAAGAGTGCCACCCTGTCCTCCACGGAGAGCACGGCGTCTGGAATGCAGGATGAGGTCAGAGCGGTTGGCGAGGAGCAAAGGTCAGAGGAGCCAAAGCGCAGGGTGGATACTTCAGTGTCTTGGGAGGCGTTGATTTGTGTCGGATCGTCCAAGAAGAGAGCGAGGAAGGCATCCTCTTCAGGTGATGAAGGAGGGCCAAGAACACTGGGAGGGGATGGCCACAGAGCGGAGGAGGCTAGCAAAGACAAAGAAG	1	2 Base Changes	VKSATLSSTESTASGMQDEVRAVGEEQRSEEPKRRVDTSVSWEALICVGSSKKRARKASSSGDEGGPRTLGGDGHRAEEASKDKE	VKSATLSSTESTASGMQDEVRAVGEEQRSEEPKRRVDTSVSWEALICVGSSKKRARKASSSDDEGGPRTLGGDGHRAEEASKDKE
GTCAAGAGTGCCACCCTGTCCTCCACGGAGAGCACGGCGTCTGGAATGCAGGATGAGGTCAGAGCGGTTGGCGAGGAGCAAAGGTCAGAGGAGCCAAAGCGCAGGGTGGATACTTCAGTGTCTTGGGAGGCGTTGATTTGTGTCGGATCGTCCAAGAAGAGAGCGAGGAAGGCATCCTCTTCGGATGATGAAGGAGGGCCAAGAACACTGGGAGGGGATGGCCACAGAGCGGAGGAGGCTAGCAAAGACAAAGAAG	GTCAAGAGTGCCACCCTGTCCTCCACGGAGAGCACGGCGTCTGGAATGCAGGATGAGGTCAGAGCGGTTGGCGAGGAGCAAAGGTCAGAGGAGCCAAAGCGCAGGGTGGATACTTCAGTGTCTTGGGAGGCGTTGATTTGTGTCGGATCGTCCAAGAAGAGAGCGAGGAAGGCATCCTCTTCGGATGATGAAGGAGGGCCAAGAACACTGGGAGGGGATGGCCACAGAGCGGAGGAGGCTAGCAAAGACAAAGAAG	1	2 Base Changes	VKSATLSSTESTASGMQDEVRAVGEEQRSEEPKRRVDTSVSWEALICVGSSKKRARKASSSDDEGGPRTLGGDGHRAEEASKDKE	VKSATLSSTESTASGMQDEVRAVGEEQRSEEPKRRVDTSVSWEALICVGSSKKRARKASSSDDEGGPRTLGGDGHRAEEASKDKE
GTCAAGAGTGCCACCCTGTCCTCCACGGAGAGCACGGCGTCTGGAATGCAGGATGAGGTCAGAGCGGTTGGCGAGGAGCAAAGGTCAGAGGAGCCAAAGCGCAGGGTGGATACTTCAGTGTCTTGGGAGGCGTTGATTTGTGTCGGATCGTCCAAGAAGAGAGCGAGGAAGGCATCCTCTTTAGATGATGAAGGAGGGCCAAGAACACTGGGAGGGGATGGCCACAGAGCGGAGGAGGCTAGCAAAGACAAAGAAG	GTCAAGAGTGCCACCCTGTCCTCCACGGAGAGCACGGCGTCTGGAATGCAGGATGAGGTCAGAGCGGTTGGCGAGGAGCAAAGGTCAGAGGAGCCAAAGCGCAGGGTGGATACTTCAGTGTCTTGGGAGGCGTTGATTTGTGTCGGATCGTCCAAGAAGAGAGCGAGGAAGGCATCCTCTTTAGATGATGAAGGAGGGCCAAGAACACTGGGAGGGGATGGCCACAGAGCGGAGGAGGCTAGCAAAGACAAAGAAG	1	2 Base Changes	VKSATLSSTESTASGMQDEVRAVGEEQRSEEPKRRVDTSVSWEALICVGSSKKRARKASSLDDEGGPRTLGGDGHRAEEASKDKE	VKSATLSSTESTASGMQDEVRAVGEEQRSEEPKRRVDTSVSWEALICVGSSKKRARKASSSDDEGGPRTLGGDGHRAEEASKDKE
GTCAAGAGTGCCACCCTGTCCTCCACGGAGAGCACGGCGTCTGGAATGCAGGATGAGGTCAGAGCGGTTGGCGAGGAGCAAAGGTCAGAGGAGCCAAAGCGCAGGGTGGATACTTCAGTGTCTTGGGAGGCGTTGATTTGTGTCGGATCGTCCAAGAAGAGAGCGAGGAAGGCATGCACTTCAGATGATGAAGGAGGGCCAAGAACACTGGGAGGGGATGGCCACAGAGCGGAGGAGGCTAGCAAAGACAAAGAAG	GTCAAGAGTGCCACCCTGTCCTCCACGGAGAGCACGGCGTCTGGAATGCAGGATGAGGTCAGAGCGGTTGGCGAGGAGCAAAGGTCAGAGGAGCCAAAGCGCAGGGTGGATACTTCAGTGTCTTGGGAGGCGTTGATTTGTGTCGGATCGTCCAAGAAGAGAGCGAGGAAGGCATGCACTTCAGATGATGAAGGAGGGCCAAGAACACTGGGAGGGGATGGCCACAGAGCGGAGGAGGCTAGCAAAGACAAAGAAG	1	3 Base Changes	VKSATLSSTESTASGMQDEVRAVGEEQRSEEPKRRVDTSVSWEALICVGSSKKRARKACTSDDEGGPRTLGGDGHRAEEASKDKE	VKSATLSSTESTASGMQDEVRAVGEEQRSEEPKRRVDTSVSWEALICVGSSKKRARKASSSDDEGGPRTLGGDGHRAEEASKDKE
GTCAAGAGTGCCACCCTGTCCTCCACGGAGAGCACGGCGTCTGGAATGCAGGATGAGGTCAGAGCGGTTGGCGAGGAGCAAAGGTCAGAGGAGCCAAAGCGCAGGGTGGATACTTCAGTGTCTTGGGAGGCGTTGATTTGTGTCGGATCGTCCAAGAGGAGAGCGAGGAAGGCATCCTCTTCAGATGATGAAGGAGGGCCAAGAACACTGGGAGGGGATGGCCACAGAGCGGAGGAGGCTAGCAAAGACAAAGAAG	GTCAAGAGTGCCACCCTGTCCTCCACGGAGAGCACGGCGTCTGGAATGCAGGATGAGGTCAGAGCGGTTGGCGAGGAGCAAAGGTCAGAGGAGCCAAAGCGCAGGGTGGATACTTCAGTGTCTTGGGAGGCGTTGATTTGTGTCGGATCGTCCAAGAGGAGAGCGAGGAAGGCATCCTCTTCAGATGATGAAGGAGGGCCAAGAACACTGGGAGGGGATGGCCACAGAGCGGAGGAGGCTAGCAAAGACAAAGAAG	1	2 Base Changes	VKSATLSSTESTASGMQDEVRAVGEEQRSEEPKRRVDTSVSWEALICVGSSKRRARKASSSDDEGGPRTLGGDGHRAEEASKDKE	VKSATLSSTESTASGMQDEVRAVGEEQRSEEPKRRVDTSVSWEALICVGSSKKRARKASSSDDEGGPRTLGGDGHRAEEASKDKE
GTCAAGAGTGCCACCCTGTCCTCCACGGAGAGCACGGCGTCTGGAATGCAGGATGAGGTCAGAGCGGTTGGCGAGGAGCAAAGGTCAGAGGAGCCAAAGCGCAGGGTGGATACTTCAGTGTCTTGGGAGGCGTTGATTTGTGTCGGATCGTTCAAGAAGAGAGCGAGGAAGGCATCCTCTTCAGATGATGAAGGAGGGCCAAGAACACTGGGAGGGGATGGCCACAGAGCGGAGGAGGCTAGCAAAGACAAAGAAG	GTCAAGAGTGCCACCCTGTCCTCCACGGAGAGCACGGCGTCTGGAATGCAGGATGAGGTCAGAGCGGTTGGCGAGGAGCAAAGGTCAGAGGAGCCAAAGCGCAGGGTGGATACTTCAGTGTCTTGGGAGGCGTTGATTTGTGTCGGATCGTTCAAGAAGAGAGCGAGGAAGGCATCCTCTTCAGATGATGAAGGAGGGCCAAGAACACTGGGAGGGGATGGCCACAGAGCGGAGGAGGCTAGCAAAGACAAAGAAG	1	2 Base Changes	VKSATLSSTESTASGMQDEVRAVGEEQRSEEPKRRVDTSVSWEALICVGSFKKRARKASSSDDEGGPRTLGGDGHRAEEASKDKE	VKSATLSSTESTASGMQDEVRAVGEEQRSEEPKRRVDTSVSWEALICVGSSKKRARKASSSDDEGGPRTLGGDGHRAEEASKDKE
GTCAAGAGTGCCACCCTGTCCTCCACGGAGAGCACGGCGTCTGGAATGCAGGATGAGGTCAGAGCGGTTGGCGAGGAGCAAAGGTCAGAGGAGCCAAAGCGCAGGGTGGATACTTCAGTGTCTTGGGATGCGTTGATTTGTGTCGGATCGTCCAAGAAGAGAGCGAGGAAGGCATCCTCTTCAGATGATGAAGGAGGGCCAAGAACACTGGGAGGGGATGGCCACAGAGCGGAGGAGGCTAGCAAAGACAAAGAAG	GTCAAGAGTGCCACCCTGTCCTCCACGGAGAGCACGGCGTCTGGAATGCAGGATGAGGTCAGAGCGGTTGGCGAGGAGCAAAGGTCAGAGGAGCCAAAGCGCAGGGTGGATACTTCAGTGTCTTGGGATGCGTTGATTTGTGTCGGATCGTCCAAGAAGAGAGCGAGGAAGGCATCCTCTTCAGATGATGAAGGAGGGCCAAGAACACTGGGAGGGGATGGCCACAGAGCGGAGGAGGCTAGCAAAGACAAAGAAG	1	2 Base Changes	VKSATLSSTESTASGMQDEVRAVGEEQRSEEPKRRVDTSVSWDALICVGSSKKRARKASSSDDEGGPRTLGGDGHRAEEASKDKE	VKSATLSSTESTASGMQDEVRAVGEEQRSEEPKRRVDTSVSWEALICVGSSKKRARKASSSDDEGGPRTLGGDGHRAEEASKDKE
GTCAAGAGTGCCACCCTGTCCTCCACGGAGAGCACGGCGTCTGGAATGCAGGATGAGGTCAGAGCGGTTGGCGAGGAGCAAAGGTCAGAGGAGCCAAAGCGCAGGGTGGATACTTCAGTGTCTTGGGGGGCGTTGATTTGTGTCGGATCGTCCAAGAAGAGAGCGAGGAAGGCATCCTCTTCAGATGATGAAGGAGGGCCAAGAACACTGGGAGGGGATGGCCACAGAGCGGAGGAGGCTAGCAAAGACAAAGAAG	GTCAAGAGTGCCACCCTGTCCTCCACGGAGAGCACGGCGTCTGGAATGCAGGATGAGGTCAGAGCGGTTGGCGAGGAGCAAAGGTCAGAGGAGCCAAAGCGCAGGGTGGATACTTCAGTGTCTTGGGGGGCGTTGATTTGTGTCGGATCGTCCAAGAAGAGAGCGAGGAAGGCATCCTCTTCAGATGATGAAGGAGGGCCAAGAACACTGGGAGGGGATGGCCACAGAGCGGAGGAGGCTAGCAAAGACAAAGAAG	1	2 Base Changes	VKSATLSSTESTASGMQDEVRAVGEEQRSEEPKRRVDTSVSWGALICVGSSKKRARKASSSDDEGGPRTLGGDGHRAEEASKDKE	VKSATLSSTESTASGMQDEVRAVGEEQRSEEPKRRVDTSVSWEALICVGSSKKRARKASSSDDEGGPRTLGGDGHRAEEASKDKE
GTCAAGAGTGCCACCCTGTCCTCCACGGAGAGCACGGCGTCTGGAATGCAGGATGAGGTCAGAGCGGTTGGCGAGGAGCAAAGGTCAGAGGAGCCAAAGCGCAGGGTGGATGCTTCAGTGTCTTGGGAGGCGTTGATTTGTGTCGGATCGTCCAAGAAGAGAGCGAGGAAGGCATCCTCTTCAGATGATGAAGGAGGGCCAAGAACACTGGGAGGGGATGGCCACAGAGCGGAGGAGGCTAGCAAAGACAAAGAAG	GTCAAGAGTGCCACCCTGTCCTCCACGGAGAGCACGGCGTCTGGAATGCAGGATGAGGTCAGAGCGGTTGGCGAGGAGCAAAGGTCAGAGGAGCCAAAGCGCAGGGTGGATGCTTCAGTGTCTTGGGAGGCGTTGATTTGTGTCGGATCGTCCAAGAAGAGAGCGAGGAAGGCATCCTCTTCAGATGATGAAGGAGGGCCAAGAACACTGGGAGGGGATGGCCACAGAGCGGAGGAGGCTAGCAAAGACAAAGAAG	1	2 Base Changes	VKSATLSSTESTASGMQDEVRAVGEEQRSEEPKRRVDASVSWEALICVGSSKKRARKASSSDDEGGPRTLGGDGHRAEEASKDKE	VKSATLSSTESTASGMQDEVRAVGEEQRSEEPKRRVDTSVSWEALICVGSSKKRARKASSSDDEGGPRTLGGDGHRAEEASKDKE
GTCAAGAGTGCCACCCTGTCCTCCACGGAGAGCACGGCGTCTGGAATGCAGGATGAGGTCAGAGCGGTTGGCGAGGAGCAAAGGTCAGAGGAGCCAAAGCGCGGGGTGGATACTTCAGTGTCTTGGGAGGCGTTGATTTGTGTCGGATCGTCCAAGAAGAGAGCGAGGAAGGCATCCTCTTCAGATGATGAAGGAGGGCCAAGAACACTGGGAGGGGATGGCCACAGAGCGGAGGAGGCTAGCAAAGACAAAGAAG	GTCAAGAGTGCCACCCTGTCCTCCACGGAGAGCACGGCGTCTGGAATGCAGGATGAGGTCAGAGCGGTTGGCGAGGAGCAAAGGTCAGAGGAGCCAAAGCGCGGGGTGGATACTTCAGTGTCTTGGGAGGCGTTGATTTGTGTCGGATCGTCCAAGAAGAGAGCGAGGAAGGCATCCTCTTCAGATGATGAAGGAGGGCCAAGAACACTGGGAGGGGATGGCCACAGAGCGGAGGAGGCTAGCAAAGACAAAGAAG	1	2 Base Changes	VKSATLSSTESTASGMQDEVRAVGEEQRSEEPKRGVDTSVSWEALICVGSSKKRARKASSSDDEGGPRTLGGDGHRAEEASKDKE	VKSATLSSTESTASGMQDEVRAVGEEQRSEEPKRRVDTSVSWEALICVGSSKKRARKASSSDDEGGPRTLGGDGHRAEEASKDKE
GTCAAGAGTGCCACCCTGTCCTCCACGGAGAGCACGGCGTCTGGAATGCAGGATGAGGTCAGAGCGGTTGGCGAGGAGCAAAGGTCAGGGGAGCCAAAGCGCAGGGTGGATACTTCAGTGTCTTGGGAGGCGTTGATTTGTGTCGGATCGTCCAAGAAGAGAGCGAGGAAGGCATCCTCTTCAGATGATGAAGGAGGGCCAAGAACACTGGGAGGGGATGGCCACAGAGCGGAGGAGGCTAGCAAAGACAAAGAAG	GTCAAGAGTGCCACCCTGTCCTCCACGGAGAGCACGGCGTCTGGAATGCAGGATGAGGTCAGAGCGGTTGGCGAGGAGCAAAGGTCAGGGGAGCCAAAGCGCAGGGTGGATACTTCAGTGTCTTGGGAGGCGTTGATTTGTGTCGGATCGTCCAAGAAGAGAGCGAGGAAGGCATCCTCTTCAGATGATGAAGGAGGGCCAAGAACACTGGGAGGGGATGGCCACAGAGCGGAGGAGGCTAGCAAAGACAAAGAAG	1	2 Base Changes	VKSATLSSTESTASGMQDEVRAVGEEQRSGEPKRRVDTSVSWEALICVGSSKKRARKASSSDDEGGPRTLGGDGHRAEEASKDKE	VKSATLSSTESTASGMQDEVRAVGEEQRSEEPKRRVDTSVSWEALICVGSSKKRARKASSSDDEGGPRTLGGDGHRAEEASKDKE
GTCAAGAGTGCCACCCTGTCCTCCACGGAGAGCACGGCGTCTGGAATGCAGGATGAGGTCAGAGCGGTTGGCGAGGGGCAAAGGTCAGAGGAGCCAAAGCGCAGGGTGGATACTTCAGTGTCTTGGGAGGCGTTGATTTGTGTCGGATCGTCCAAGAAGAGAGCGAGGAAGGCATCCTCTTCAGATGATGAAGGAGGGCCAAGAACACTGGGAGGGGATGGCCACAGAGCGGAGGAGGCTAGCAAAGACAAAGAAG	GTCAAGAGTGCCACCCTGTCCTCCACGGAGAGCACGGCGTCTGGAATGCAGGATGAGGTCAGAGCGGTTGGCGAGGGGCAAAGGTCAGAGGAGCCAAAGCGCAGGGTGGATACTTCAGTGTCTTGGGAGGCGTTGATTTGTGTCGGATCGTCCAAGAAGAGAGCGAGGAAGGCATCCTCTTCAGATGATGAAGGAGGGCCAAGAACACTGGGAGGGGATGGCCACAGAGCGGAGGAGGCTAGCAAAGACAAAGAAG	1	2 Base Changes	VKSATLSSTESTASGMQDEVRAVGEGQRSEEPKRRVDTSVSWEALICVGSSKKRARKASSSDDEGGPRTLGGDGHRAEEASKDKE	VKSATLSSTESTASGMQDEVRAVGEEQRSEEPKRRVDTSVSWEALICVGSSKKRARKASSSDDEGGPRTLGGDGHRAEEASKDKE
GTCAAGAGTGCCACCCTGTCCTCCACGGAGAGCACGGCGTCTGGAATGCAGGATGAGGTCTGAGCGGTTGGCGAGGAGCAAAGGTCAGAGGAGCCAAAGCGCAGGGTGGATACTTCAGTGTCTTGGGAGGCGTTGATTTGTGTCGGATCGTCCAAGAAGAGAGCGAGGAAGGCATCCTCTTCAGATGATGAAGGAGGGCCAAGAACACTGGGAGGGGATGGCCACAGAGCGGAGGAGGCTAGCAAAGACAAAGAAG	GTCAAGAGTGCCACCCTGTCCTCCACGGAGAGCACGGCGTCTGGAATGCAGGATGAGGTCTGAGCGGTTGGCGAGGAGCAAAGGTCAGAGGAGCCAAAGCGCAGGGTGGATACTTCAGTGTCTTGGGAGGCGTTGATTTGTGTCGGATCGTCCAAGAAGAGAGCGAGGAAGGCATCCTCTTCAGATGATGAAGGAGGGCCAAGAACACTGGGAGGGGATGGCCACAGAGCGGAGGAGGCTAGCAAAGACAAAGAAG	1	2 Base Changes	VKSATLSSTESTASGMQDEV*	VKSATLSSTESTASGMQDEVRAVGEEQRSEEPKRRVDTSVSWEALICVGSSKKRARKASSSDDEGGPRTLGGDGHRAEEASKDKE
GTCAAGAGTGCCACCCTGTCCTCCACGGAGAGCACGGCGTCTGGAGTGCAGGATGAGGTCAGAGCGGTTGGCGAGGAGCAAAGGTCAGAGGAGCCAAAGCGCAGGGTGGATACTTCAGTGTCTTGGGAGGCGTTGATTTGTGTCGGATCGTCCAAGAAGAGAGCGAGGAAGGCATCCTCTTCAGATGATGAAGGAGGGCCAAGAACACTGGGAGGGGATGGCCACAGAGCGGAGGAGGCTGGCAAAGACAAAGAAG	GTCAAGAGTGCCACCCTGTCCTCCACGGAGAGCACGGCGTCTGGAGTGCAGGATGAGGTCAGAGCGGTTGGCGAGGAGCAAAGGTCAGAGGAGCCAAAGCGCAGGGTGGATACTTCAGTGTCTTGGGAGGCGTTGATTTGTGTCGGATCGTCCAAGAAGAGAGCGAGGAAGGCATCCTCTTCAGATGATGAAGGAGGGCCAAGAACACTGGGAGGGGATGGCCACAGAGCGGAGGAGGCTGGCAAAGACAAAGAAG	1	3 Base Changes	VKSATLSSTESTASGVQDEVRAVGEEQRSEEPKRRVDTSVSWEALICVGSSKKRARKASSSDDEGGPRTLGGDGHRAEEAGKDKE	VKSATLSSTESTASGMQDEVRAVGEEQRSEEPKRRVDTSVSWEALICVGSSKKRARKASSSDDEGGPRTLGGDGHRAEEASKDKE
GTCAAGAGTGCCACCCTGTCCTCCACGGAGAGCACGGCGTCTGGAGTGCAGGATGAGGTCAGAGCGGTTGGCGAGGAGCAAAGGTCAGAGGAGCCAAAGCGCAGGGTGGATACTTCGGTGTCTTGGGAGGCGTTGATTTGTGTCGGATCGTCCAAGAAGAGAGCGAGGAAGGCATCCTCTTCAGATGATGAAGGAGGGCCAAGAACACTGGGAGGGGATGGCCACAGAGCGGAGGAGGCTAGCAAAGACAAAGAAG	GTCAAGAGTGCCACCCTGTCCTCCACGGAGAGCACGGCGTCTGGAGTGCAGGATGAGGTCAGAGCGGTTGGCGAGGAGCAAAGGTCAGAGGAGCCAAAGCGCAGGGTGGATACTTCGGTGTCTTGGGAGGCGTTGATTTGTGTCGGATCGTCCAAGAAGAGAGCGAGGAAGGCATCCTCTTCAGATGATGAAGGAGGGCCAAGAACACTGGGAGGGGATGGCCACAGAGCGGAGGAGGCTAGCAAAGACAAAGAAG	1	3 Base Changes	VKSATLSSTESTASGVQDEVRAVGEEQRSEEPKRRVDTSVSWEALICVGSSKKRARKASSSDDEGGPRTLGGDGHRAEEASKDKE	VKSATLSSTESTASGMQDEVRAVGEEQRSEEPKRRVDTSVSWEALICVGSSKKRARKASSSDDEGGPRTLGGDGHRAEEASKDKE
GTCAAGAGTGCCACCCTGTCCTCCACGGAGAGTACGGCGTCTGGAATGCAGGATGAGGTCAGAGCGGTTGGCGAGGAGCAAAGGTCAGAGGAGCCAAAGCGCAGGGTGGATACTTCAGTGTCTTGGGAGGCGTTGATTTGTGTCGGATCGTCCAAGAAGAGAGCGAGGAAGGCATCCTCTTCAGATGATGAAGGAGGGCCAAGAACACTGGGAGGGGATGGCCACAGAGCGGAGGAGGCTAGCAAAGACAAAGAAG	GTCAAGAGTGCCACCCTGTCCTCCACGGAGAGTACGGCGTCTGGAATGCAGGATGAGGTCAGAGCGGTTGGCGAGGAGCAAAGGTCAGAGGAGCCAAAGCGCAGGGTGGATACTTCAGTGTCTTGGGAGGCGTTGATTTGTGTCGGATCGTCCAAGAAGAGAGCGAGGAAGGCATCCTCTTCAGATGATGAAGGAGGGCCAAGAACACTGGGAGGGGATGGCCACAGAGCGGAGGAGGCTAGCAAAGACAAAGAAG	1	2 Base Changes	VKSATLSSTESTASGMQDEVRAVGEEQRSEEPKRRVDTSVSWEALICVGSSKKRARKASSSDDEGGPRTLGGDGHRAEEASKDKE	VKSATLSSTESTASGMQDEVRAVGEEQRSEEPKRRVDTSVSWEALICVGSSKKRARKASSSDDEGGPRTLGGDGHRAEEASKDKE
GTCAAGAGTGCCACCGTGTCCTCAACGGAGAGCACGGCGTCTGGAATGCAGGATGAGGTCAGAGCGGTGTGCGAGGAGCAAAGGTCAGAGGAGCCAAAGCGCAGGGTGGATACTTCAGTGTCTTGGGAGGCGTTGATTTGTGTCGGATCGTCCAAGAAGAGAGCGAGGAAGGCATCCTCTTCAGATGATGAAGGAGGGCCAAGAACACTGGGAGGGGATGGCCACAGAGCGGAGGAGGCTAGCAAAGACAAAGAAG	GTCAAGAGTGCCACCGTGTCCTCAACGGAGAGCACGGCGTCTGGAATGCAGGATGAGGTCAGAGCGGTGTGCGAGGAGCAAAGGTCAGAGGAGCCAAAGCGCAGGGTGGATACTTCAGTGTCTTGGGAGGCGTTGATTTGTGTCGGATCGTCCAAGAAGAGAGCGAGGAAGGCATCCTCTTCAGATGATGAAGGAGGGCCAAGAACACTGGGAGGGGATGGCCACAGAGCGGAGGAGGCTAGCAAAGACAAAGAAG	1	4 Base Changes	VKSATVSSTESTASGMQDEVRAVCEEQRSEEPKRRVDTSVSWEALICVGSSKKRARKASSSDDEGGPRTLGGDGHRAEEASKDKE	VKSATLSSTESTASGMQDEVRAVGEEQRSEEPKRRVDTSVSWEALICVGSSKKRARKASSSDDEGGPRTLGGDGHRAEEASKDKE
GTCAAGAGTGCCACCGTGTCCTCAACGGAGAGCACGGCGTCTGGAATGCAGGATGAGGTCAGAGCGGTTGGCGAGGAGCAAAGGTCAGAGGAGCCAAAGCGCAGGGTGGATACTTCAGTGTCTTGGGAGGCGTTGATTTGTGTCGGATCGTACAAGAAGAGAGCGAGGAAGTCATCCTCTTCAGATGATGAAGGAGTGCCAAGAACACTAGGAGGGGATGGCCACAGAGCGGAGGAGGCTAGCAAAGACAAAGAAG	GTCAAGAGTGCCACCGTGTCCTCAACGGAGAGCACGGCGTCTGGAATGCAGGATGAGGTCAGAGCGGTTGGCGAGGAGCAAAGGTCAGAGGAGCCAAAGCGCAGGGTGGATACTTCAGTGTCTTGGGAGGCGTTGATTTGTGTCGGATCGTACAAGAAGAGAGCGAGGAAGTCATCCTCTTCAGATGATGAAGGAGTGCCAAGAACACTAGGAGGGGATGGCCACAGAGCGGAGGAGGCTAGCAAAGACAAAGAAG	1	6 Base Changes	VKSATVSSTESTASGMQDEVRAVGEEQRSEEPKRRVDTSVSWEALICVGSYKKRARKSSSSDDEGVPRTLGGDGHRAEEASKDKE	VKSATLSSTESTASGMQDEVRAVGEEQRSEEPKRRVDTSVSWEALICVGSSKKRARKASSSDDEGGPRTLGGDGHRAEEASKDKE
GTCAAGAGTGCCACCGTGTCCTCCACGGAGAGCACGGCGTCTGGAAGGCAGGATGAGGTCAGAGCGGTTGGCGAGGAGCAAAGGTCAGAGGAGCCAAAGCGCAGGGTGGATACTTCAGTGTCTTGGGAGGCGTTGATTTGTGTCGGATCGTCCAAGAAGAGAGCGAGGAAGGCATCCTCTTCAGATGATGAAGGAGGGCCAAGAACACTGGGAGGGGATGGCCACAGAGCGGAGGAGGCTAGCACAGTCAAAGAAG	GTCAAGAGTGCCACCGTGTCCTCCACGGAGAGCACGGCGTCTGGAAGGCAGGATGAGGTCAGAGCGGTTGGCGAGGAGCAAAGGTCAGAGGAGCCAAAGCGCAGGGTGGATACTTCAGTGTCTTGGGAGGCGTTGATTTGTGTCGGATCGTCCAAGAAGAGAGCGAGGAAGGCATCCTCTTCAGATGATGAAGGAGGGCCAAGAACACTGGGAGGGGATGGCCACAGAGCGGAGGAGGCTAGCACAGTCAAAGAAG	1	4 Base Changes	VKSATVSSTESTASGRQDEVRAVGEEQRSEEPKRRVDTSVSWEALICVGSSKKRARKASSSDDEGGPRTLGGDGHRAEEASTVKE	VKSATLSSTESTASGMQDEVRAVGEEQRSEEPKRRVDTSVSWEALICVGSSKKRARKASSSDDEGGPRTLGGDGHRAEEASKDKE
GTCAAGAGTGCCACCGTGTCCTCCACGGAGAGCACGGCGTCTGGAATGCAGGATGAGGTCAGAGCGGTTGGCGAGGAGCAAAGGTCAGAGGAGCCAAAGCGCAGGGTGGATAATTCAGTGTCTTGGGAGGCGTTGATTTGTGTCGGATCGTCCAAGAAGAGAGCGAGTAAGGCATCCTCTTCAGATGATGAAGGAGGGCCAAGAACACTGGGAGGGGATGGCCACAAAGCGGAGGAGGCTAGCAAAGACAAAGAAG	GTCAAGAGTGCCACCGTGTCCTCCACGGAGAGCACGGCGTCTGGAATGCAGGATGAGGTCAGAGCGGTTGGCGAGGAGCAAAGGTCAGAGGAGCCAAAGCGCAGGGTGGATAATTCAGTGTCTTGGGAGGCGTTGATTTGTGTCGGATCGTCCAAGAAGAGAGCGAGTAAGGCATCCTCTTCAGATGATGAAGGAGGGCCAAGAACACTGGGAGGGGATGGCCACAAAGCGGAGGAGGCTAGCAAAGACAAAGAAG	1	4 Base Changes	VKSATVSSTESTASGMQDEVRAVGEEQRSEEPKRRVDNSVSWEALICVGSSKKRASKASSSDDEGGPRTLGGDGHKAEEASKDKE	VKSATLSSTESTASGMQDEVRAVGEEQRSEEPKRRVDTSVSWEALICVGSSKKRARKASSSDDEGGPRTLGGDGHRAEEASKDKE
GTCAAGAGTGCCACCGTGTCCTCCACGGAGAGCACGGCGTCTGGAATGCAGGATGAGGTCAGAGCGGTTGGCGAGGAGCAAAGGTCAGAGGAGCCAAAGCGCAGGGTGGATACTTCAGTGTCTTGGGAGGCGTTGATTTATGTCGGATCGTCCAAGAAGAGAGCGAGGAAGGCATCCTCTTCAGATGATGAAGGAGGGCCAAGAACACTGGGAGGGGATGGCCACAGAGCGGAGGAGGCTAGCAAAGACAAAGAAG	GTCAAGAGTGCCACCGTGTCCTCCACGGAGAGCACGGCGTCTGGAATGCAGGATGAGGTCAGAGCGGTTGGCGAGGAGCAAAGGTCAGAGGAGCCAAAGCGCAGGGTGGATACTTCAGTGTCTTGGGAGGCGTTGATTTATGTCGGATCGTCCAAGAAGAGAGCGAGGAAGGCATCCTCTTCAGATGATGAAGGAGGGCCAAGAACACTGGGAGGGGATGGCCACAGAGCGGAGGAGGCTAGCAAAGACAAAGAAG	1	2 Base Changes	VKSATVSSTESTASGMQDEVRAVGEEQRSEEPKRRVDTSVSWEALIYVGSSKKRARKASSSDDEGGPRTLGGDGHRAEEASKDKE	VKSATLSSTESTASGMQDEVRAVGEEQRSEEPKRRVDTSVSWEALICVGSSKKRARKASSSDDEGGPRTLGGDGHRAEEASKDKE
GTCAAGAGTGCCACCGTGTCCTCCACGGAGAGCACGGCGTCTGGAATGCAGGATGAGGTCAGAGCGGTTGGCGAGGAGCAAAGGTCAGAGGAGCCAAAGCGCAGGGTGGATACTTCAGTGTCTTGGGAGGCGTTGATTTGTGCCGGATCGTCCAAGAAGAGAGCGAGGAAGGCATCCTCTTCAGATGATGAAGGAGGGCCAAGAACACTGGGAGGGGATGGCCACAGAGCGGAGGAGGCTAGCAAAGACAAAGAAG	GTCAAGAGTGCCACCGTGTCCTCCACGGAGAGCACGGCGTCTGGAATGCAGGATGAGGTCAGAGCGGTTGGCGAGGAGCAAAGGTCAGAGGAGCCAAAGCGCAGGGTGGATACTTCAGTGTCTTGGGAGGCGTTGATTTGTGCCGGATCGTCCAAGAAGAGAGCGAGGAAGGCATCCTCTTCAGATGATGAAGGAGGGCCAAGAACACTGGGAGGGGATGGCCACAGAGCGGAGGAGGCTAGCAAAGACAAAGAAG	1	2 Base Changes	VKSATVSSTESTASGMQDEVRAVGEEQRSEEPKRRVDTSVSWEALICAGSSKKRARKASSSDDEGGPRTLGGDGHRAEEASKDKE	VKSATLSSTESTASGMQDEVRAVGEEQRSEEPKRRVDTSVSWEALICVGSSKKRARKASSSDDEGGPRTLGGDGHRAEEASKDKE
GTCAAGAGTGCCACCGTGTCCTCCACGGAGAGCACGGCGTCTGGAATGCAGGATGAGGTCAGAGCGGTTGGCGAGGAGCAAAGGTCAGAGGAGCCAAAGCGCAGGGTGGATACTTCAGTGTCTTGGGAGGCGTTGATTTGTGTCGGATCGTCCAAGAAGAGAGCGAGGAAGGCATCCTCTTCAGATAATGAAGGAGGGCCAAGAACACTGGGAGGGGATGGCCACAGAGCGGAGGAGGCTAGCAAAGACAAAGAAG	GTCAAGAGTGCCACCGTGTCCTCCACGGAGAGCACGGCGTCTGGAATGCAGGATGAGGTCAGAGCGGTTGGCGAGGAGCAAAGGTCAGAGGAGCCAAAGCGCAGGGTGGATACTTCAGTGTCTTGGGAGGCGTTGATTTGTGTCGGATCGTCCAAGAAGAGAGCGAGGAAGGCATCCTCTTCAGATAATGAAGGAGGGCCAAGAACACTGGGAGGGGATGGCCACAGAGCGGAGGAGGCTAGCAAAGACAAAGAAG	1	2 Base Changes	VKSATVSSTESTASGMQDEVRAVGEEQRSEEPKRRVDTSVSWEALICVGSSKKRARKASSSDNEGGPRTLGGDGHRAEEASKDKE	VKSATLSSTESTASGMQDEVRAVGEEQRSEEPKRRVDTSVSWEALICVGSSKKRARKASSSDDEGGPRTLGGDGHRAEEASKDKE
GTCAAGAGTGCCACCGTGTCCTCCACGGAGAGCACGGCGTCTGGAATGCAGGATGAGGTCAGAGCGGTTGGCGAGGAGCAAAGGTCAGAGGAGCCAAAGCGCAGGGTGGATACTTCAGTGTCTTGGGAGGCGTTGATTTGTGTCGGATCGTCCAAGAAGAGAGCGAGGAAGGCATCCTCTTCAGATGATGAAGGAGGGCCAAGAACACTGGGAGGGGATGGCCACAGAGCGGATGAGGCTAGCAAAGACAAAGAAG	GTCAAGAGTGCCACCGTGTCCTCCACGGAGAGCACGGCGTCTGGAATGCAGGATGAGGTCAGAGCGGTTGGCGAGGAGCAAAGGTCAGAGGAGCCAAAGCGCAGGGTGGATACTTCAGTGTCTTGGGAGGCGTTGATTTGTGTCGGATCGTCCAAGAAGAGAGCGAGGAAGGCATCCTCTTCAGATGATGAAGGAGGGCCAAGAACACTGGGAGGGGATGGCCACAGAGCGGATGAGGCTAGCAAAGACAAAGAAG	1	2 Base Changes	VKSATVSSTESTASGMQDEVRAVGEEQRSEEPKRRVDTSVSWEALICVGSSKKRARKASSSDDEGGPRTLGGDGHRADEASKDKE	VKSATLSSTESTASGMQDEVRAVGEEQRSEEPKRRVDTSVSWEALICVGSSKKRARKASSSDDEGGPRTLGGDGHRAEEASKDKE
GTCAAGAGTGCCACCGTGTCCTCCACGGAGAGCACGGCGTCTGGAATGCAGGATGAGGTCAGAGCGGTTGGCGAGGAGCAAAGGTCAGAGGAGCCAAAGCGCAGGGTGGATACTTCAGTGTCTTGGGAGGCGTTGATTTGTGTCGGATCGTCCAAGAAGAGAGCGAGGAAGGCATCCTCTTCAGATGATGAAGGAGGGCCACGAACACTGGGAGGGGATGGCCACAGAGCGGAGGAGGCTAGCAAAGACAAAGAAG	GTCAAGAGTGCCACCGTGTCCTCCACGGAGAGCACGGCGTCTGGAATGCAGGATGAGGTCAGAGCGGTTGGCGAGGAGCAAAGGTCAGAGGAGCCAAAGCGCAGGGTGGATACTTCAGTGTCTTGGGAGGCGTTGATTTGTGTCGGATCGTCCAAGAAGAGAGCGAGGAAGGCATCCTCTTCAGATGATGAAGGAGGGCCACGAACACTGGGAGGGGATGGCCACAGAGCGGAGGAGGCTAGCAAAGACAAAGAAG	1	2 Base Changes	VKSATVSSTESTASGMQDEVRAVGEEQRSEEPKRRVDTSVSWEALICVGSSKKRARKASSSDDEGGPRTLGGDGHRAEEASKDKE	VKSATLSSTESTASGMQDEVRAVGEEQRSEEPKRRVDTSVSWEALICVGSSKKRARKASSSDDEGGPRTLGGDGHRAEEASKDKE
GTCAAGAGTGCCACCGTGTCCTCCACGGAGAGCACGGCGTCTGGAATGCAGGATGAGGTCAGAGCGGTTGGCGAGGAGCAAAGGTCAGAGGAGCCAAAGCGCAGGGTGGATACTTCAGTGTCTTGGGAGGCGTTGATTTGTGTCGGATCGTCCAAGAAGAGAGCGAGGAAGGCATCCTCTTCAGGTGATGAAGGAGGGCCAAGAACACTGGGAGGGGATGGCCACAGAGCGGAGGAGGCTAGCAAAGACAAAGAAG	GTCAAGAGTGCCACCGTGTCCTCCACGGAGAGCACGGCGTCTGGAATGCAGGATGAGGTCAGAGCGGTTGGCGAGGAGCAAAGGTCAGAGGAGCCAAAGCGCAGGGTGGATACTTCAGTGTCTTGGGAGGCGTTGATTTGTGTCGGATCGTCCAAGAAGAGAGCGAGGAAGGCATCCTCTTCAGGTGATGAAGGAGGGCCAAGAACACTGGGAGGGGATGGCCACAGAGCGGAGGAGGCTAGCAAAGACAAAGAAG	1	2 Base Changes	VKSATVSSTESTASGMQDEVRAVGEEQRSEEPKRRVDTSVSWEALICVGSSKKRARKASSSGDEGGPRTLGGDGHRAEEASKDKE	VKSATLSSTESTASGMQDEVRAVGEEQRSEEPKRRVDTSVSWEALICVGSSKKRARKASSSDDEGGPRTLGGDGHRAEEASKDKE
GTCAAGAGTGCCACCGTGTCCTCCACGGAGAGCACGGCGTCTGGAATGCAGGATGAGGTCAGAGCGGTTGGCGAGGAGCAAAGGTCAGAGGAGCCAAAGCGCAGGGTGGATACTTCAGTGTCTTGGGAGGCGTTGATTTGTGTCGGATCTTCCAAGAAGAGAGCGAGGAAGGCATCCCCTTCAGATGATGAAGGAGGGCCAAGAACACTGGGAGGGGATGGCCACTGAGCGGAGGAGGCTAGCAAAGACAAAGAAG	GTCAAGAGTGCCACCGTGTCCTCCACGGAGAGCACGGCGTCTGGAATGCAGGATGAGGTCAGAGCGGTTGGCGAGGAGCAAAGGTCAGAGGAGCCAAAGCGCAGGGTGGATACTTCAGTGTCTTGGGAGGCGTTGATTTGTGTCGGATCTTCCAAGAAGAGAGCGAGGAAGGCATCCCCTTCAGATGATGAAGGAGGGCCAAGAACACTGGGAGGGGATGGCCACTGAGCGGAGGAGGCTAGCAAAGACAAAGAAG	1	4 Base Changes	VKSATVSSTESTASGMQDEVRAVGEEQRSEEPKRRVDTSVSWEALICVGSSKKRARKASPSDDEGGPRTLGGDGH*	VKSATLSSTESTASGMQDEVRAVGEEQRSEEPKRRVDTSVSWEALICVGSSKKRARKASSSDDEGGPRTLGGDGHRAEEASKDKE
GTCAAGAGTGCCACCGTGTCCTCCACGGAGAGCACGGCGTCTGGAATGCAGGATGAGGTCAGTGCGGTTGGCGAGGAGCAAAGGTCAGAGGAGCCCACGCGCAGGGTGGATACTTCAGTGTCTTGGGAGGCGTTGATTTGTGTCGGATCGTCCAAGAAGAGAGCGAGGAAGGCATCCTCTTCAGATGATGACGGAGGGCCAAGAACCCTGGGAGGGGATGGCCACAGGGCGGAGGAGGCTAGCAAAGACAAAGAAG	GTCAAGAGTGCCACCGTGTCCTCCACGGAGAGCACGGCGTCTGGAATGCAGGATGAGGTCAGTGCGGTTGGCGAGGAGCAAAGGTCAGAGGAGCCCACGCGCAGGGTGGATACTTCAGTGTCTTGGGAGGCGTTGATTTGTGTCGGATCGTCCAAGAAGAGAGCGAGGAAGGCATCCTCTTCAGATGATGACGGAGGGCCAAGAACCCTGGGAGGGGATGGCCACAGGGCGGAGGAGGCTAGCAAAGACAAAGAAG	1	7 Base Changes	VKSATVSSTESTASGMQDEVSAVGEEQRSEEPTRRVDTSVSWEALICVGSSKKRARKASSSDDDGGPRTLGGDGHRAEEASKDKE	VKSATLSSTESTASGMQDEVRAVGEEQRSEEPKRRVDTSVSWEALICVGSSKKRARKASSSDDEGGPRTLGGDGHRAEEASKDKE
GTCAAGAGTGCCACCGTGTCCTCCACGGAGAGCACGGCGTCTGGAATGCAGGGTGAGGTCAGAGCGGTTGGCGAGGAGCAAAGGTCAGAGGAGCCAAAGCGCAGGGTGGATACTTCAGTGTCTTGGGAGGCGTTGATTTGTGTCGGATCGTCCAAGAAGAGAGCGAGGAAGGCATCCTCTTCAGATGATGAAGGAGGGCCAAGAACACTGGGAGGGGATGGCCACAGAGCGGAGGAGGCTAGCAAAGACAAAGAAG	GTCAAGAGTGCCACCGTGTCCTCCACGGAGAGCACGGCGTCTGGAATGCAGGGTGAGGTCAGAGCGGTTGGCGAGGAGCAAAGGTCAGAGGAGCCAAAGCGCAGGGTGGATACTTCAGTGTCTTGGGAGGCGTTGATTTGTGTCGGATCGTCCAAGAAGAGAGCGAGGAAGGCATCCTCTTCAGATGATGAAGGAGGGCCAAGAACACTGGGAGGGGATGGCCACAGAGCGGAGGAGGCTAGCAAAGACAAAGAAG	1	2 Base Changes	VKSATVSSTESTASGMQGEVRAVGEEQRSEEPKRRVDTSVSWEALICVGSSKKRARKASSSDDEGGPRTLGGDGHRAEEASKDKE	VKSATLSSTESTASGMQDEVRAVGEEQRSEEPKRRVDTSVSWEALICVGSSKKRARKASSSDDEGGPRTLGGDGHRAEEASKDKE
GTCAAGAGTGCCACCGTGTCCTCCACGGAGAGCACGGCGTCTGGAGTGCAGGATGAGGTCAGAGCGGTTGGCGAGGAGCAAAGGTCAGAGGAGCCAAAGCGCAGGGTGGATACTTCAGTGTCTTGGGAGGCGTTGATTTGTGTCGGATCGTCCAAGAAGAGAGCGAGGAAGGCATCCTCTTCAGATGATGAAGGAGGGCCAAGAACACTGGGAGGGGATGGCCACAGAGCGGAGGAGGCTAGCAAAGACAAAGAAG	GTCAAGAGTGCCACCGTGTCCTCCACGGAGAGCACGGCGTCTGGAGTGCAGGATGAGGTCAGAGCGGTTGGCGAGGAGCAAAGGTCAGAGGAGCCAAAGCGCAGGGTGGATACTTCAGTGTCTTGGGAGGCGTTGATTTGTGTCGGATCGTCCAAGAAGAGAGCGAGGAAGGCATCCTCTTCAGATGATGAAGGAGGGCCAAGAACACTGGGAGGGGATGGCCACAGAGCGGAGGAGGCTAGCAAAGACAAAGAAG	1	2 Base Changes	VKSATVSSTESTASGVQDEVRAVGEEQRSEEPKRRVDTSVSWEALICVGSSKKRARKASSSDDEGGPRTLGGDGHRAEEASKDKE	VKSATLSSTESTASGMQDEVRAVGEEQRSEEPKRRVDTSVSWEALICVGSSKKRARKASSSDDEGGPRTLGGDGHRAEEASKDKE
GTCAAGAGTGCCACCTACTCCTCCACGGAGAGCACGGCGTCTGGAATGCCGGTTGAGGTCAGAGCGGTTGTCGAGGAGCAAAGGTCAGAGGAGCCAAAGAGCAGGGTGGATACTTCTGTGTCTTGTGTGGCGTTGATTTGTGTCGGATAGTCCAAGAAGAGAGCGAGGTAGGCATCCTCTTCAGATGATTAAGGTTGGCCAAGAACACTGGGAGGGGATGGCCACAGAGCGGAGGAGGCTAGCAAAGACAAAGAAG	GTCAAGAGTGCCACCTACTCCTCCACGGAGAGCACGGCGTCTGGAATGCCGGTTGAGGTCAGAGCGGTTGTCGAGGAGCAAAGGTCAGAGGAGCCAAAGAGCAGGGTGGATACTTCTGTGTCTTGTGTGGCGTTGATTTGTGTCGGATAGTCCAAGAAGAGAGCGAGGTAGGCATCCTCTTCAGATGATTAAGGTTGGCCAAGAACACTGGGAGGGGATGGCCACAGAGCGGAGGAGGCTAGCAAAGACAAAGAAG	1	14 Base Changes	VKSATYSSTESTASGMPVEVRAVVEEQRSEEPKSRVDTSVSCVALICVG*	VKSATLSSTESTASGMQDEVRAVGEEQRSEEPKRRVDTSVSWEALICVGSSKKRARKASSSDDEGGPRTLGGDGHRAEEASKDKE
GTCAAGAGTGCCACCTAGACCACCACGGAGAGCACGGCGTCTGGAATGCAGGATGAGGTCAGAGCGGTTGGCGAGGAGCAAAGGTCAGAGGAGCCAAAGCGCAGGGTGGATACTTCAGTGTCTTGGGAGGCGTTGATTTGTGTCGGATCGTCCAAGAAGAGAGCGAGGAAGGCATCCTCTTCAGATGATGAAGGAGGGCCAAGAACACTGGGAGGGGATGGCCACAGAGCGGAGGAGGCTAGCAAAGACAAAGAAG	GTCAAGAGTGCCACCTAGACCACCACGGAGAGCACGGCGTCTGGAATGCAGGATGAGGTCAGAGCGGTTGGCGAGGAGCAAAGGTCAGAGGAGCCAAAGCGCAGGGTGGATACTTCAGTGTCTTGGGAGGCGTTGATTTGTGTCGGATCGTCCAAGAAGAGAGCGAGGAAGGCATCCTCTTCAGATGATGAAGGAGGGCCAAGAACACTGGGAGGGGATGGCCACAGAGCGGAGGAGGCTAGCAAAGACAAAGAAG	1	3 Base Changes	VKSAT*	VKSATLSSTESTASGMQDEVRAVGEEQRSEEPKRRVDTSVSWEALICVGSSKKRARKASSSDDEGGPRTLGGDGHRAEEASKDKE
GTCAAGAGTGCCACCTAGACCTCCACGGAGAGCACGGCGTCTGGAATGCAGGATGAGGTCAGAGCGGTTGGCGAGGAGCAAAGGTCAGAGGAGCCAAAGCGCAGGGTGGATACTTCAGTGTCTTGGGAGGCGTTGATTTGTGTCGGATCGTCCAAGAAGAGAGCGAGGAAGGCATACTCTTCAGATGATGAAGGAGGGCCAAGAACACTGGGAGGGGATGGCCACAGAGCGGAGGAGGCTAGCAAAGACAAAGAAG	GTCAAGAGTGCCACCTAGACCTCCACGGAGAGCACGGCGTCTGGAATGCAGGATGAGGTCAGAGCGGTTGGCGAGGAGCAAAGGTCAGAGGAGCCAAAGCGCAGGGTGGATACTTCAGTGTCTTGGGAGGCGTTGATTTGTGTCGGATCGTCCAAGAAGAGAGCGAGGAAGGCATACTCTTCAGATGATGAAGGAGGGCCAAGAACACTGGGAGGGGATGGCCACAGAGCGGAGGAGGCTAGCAAAGACAAAGAAG	1	3 Base Changes	VKSAT*	VKSATLSSTESTASGMQDEVRAVGEEQRSEEPKRRVDTSVSWEALICVGSSKKRARKASSSDDEGGPRTLGGDGHRAEEASKDKE
GTCAAGAGTGCCACCTAGTACACCACGGAGAGCACGGCGTCTGGAATGCAGGATGAGGTCAGAGCGGTTGGCGAGGAGCAGAGGTCAGAGGAGCCAAAGCGCAGGGTGGATACTTCAGTGTCTTGGGAGGCGTTGATTTGTGTCGGATCGTCCAAGAAGAGAGCGAGGAAGGCATCCTCTTCTGATGATGAAGGAGGGCCAAGAACACTGGGAGGGGATGGCCACAGAGCGGAGGAGGCTAGCAAAGACAAAGAAG	GTCAAGAGTGCCACCTAGTACACCACGGAGAGCACGGCGTCTGGAATGCAGGATGAGGTCAGAGCGGTTGGCGAGGAGCAGAGGTCAGAGGAGCCAAAGCGCAGGGTGGATACTTCAGTGTCTTGGGAGGCGTTGATTTGTGTCGGATCGTCCAAGAAGAGAGCGAGGAAGGCATCCTCTTCTGATGATGAAGGAGGGCCAAGAACACTGGGAGGGGATGGCCACAGAGCGGAGGAGGCTAGCAAAGACAAAGAAG	1	5 Base Changes	VKSAT*	VKSATLSSTESTASGMQDEVRAVGEEQRSEEPKRRVDTSVSWEALICVGSSKKRARKASSSDDEGGPRTLGGDGHRAEEASKDKE
GTCAAGAGTGCCACCTAGTACTCCACGGAGAGCACGGCGTCTGGAATGCAGGATGAGGTCAGAGCGGTTGGCGAGGAGCAAAGGTCAGAGGAGCCAAAGCGCAGGGTTGATAATTCAGTGTCTTGGGAGGCGTTGATTTGTGTAGGATCGTCCAAGAAGAGAGCGAGGAAGGCATCCTCTTCAGATGATGAAGGAGGGCCAAGAACACTGGGAGGGGATGGCCACAGAGCGGAGGAGGCTAGCAAAGACAAAGAAG	GTCAAGAGTGCCACCTAGTACTCCACGGAGAGCACGGCGTCTGGAATGCAGGATGAGGTCAGAGCGGTTGGCGAGGAGCAAAGGTCAGAGGAGCCAAAGCGCAGGGTTGATAATTCAGTGTCTTGGGAGGCGTTGATTTGTGTAGGATCGTCCAAGAAGAGAGCGAGGAAGGCATCCTCTTCAGATGATGAAGGAGGGCCAAGAACACTGGGAGGGGATGGCCACAGAGCGGAGGAGGCTAGCAAAGACAAAGAAG	1	5 Base Changes	VKSAT*	VKSATLSSTESTASGMQDEVRAVGEEQRSEEPKRRVDTSVSWEALICVGSSKKRARKASSSDDEGGPRTLGGDGHRAEEASKDKE
GTCAAGAGTGCCACCTAGTCCACCACGGAGAGCACGGCGTCTGGAATGCAGGATGAGGTCAGAGCGGTTGGCGAGGAGCAAAGGTCAGAGGAGCCAAAGCGCAGGGTGGATACTTCAGTGTCTTGGGAGGCGTTGATTTGTGTCGGATCGTCCAAGAAGAGAGCGAGGAAGGCATCCTCTTCAGATGATGAAGGAGGGCCAAGAACACTGGGAGGGGATGGCCACAGAGCGGAGGAGGCTAGCAAAGACAAAGAAG	GTCAAGAGTGCCACCTAGTCCACCACGGAGAGCACGGCGTCTGGAATGCAGGATGAGGTCAGAGCGGTTGGCGAGGAGCAAAGGTCAGAGGAGCCAAAGCGCAGGGTGGATACTTCAGTGTCTTGGGAGGCGTTGATTTGTGTCGGATCGTCCAAGAAGAGAGCGAGGAAGGCATCCTCTTCAGATGATGAAGGAGGGCCAAGAACACTGGGAGGGGATGGCCACAGAGCGGAGGAGGCTAGCAAAGACAAAGAAG	1	2 Base Changes	VKSAT*	VKSATLSSTESTASGMQDEVRAVGEEQRSEEPKRRVDTSVSWEALICVGSSKKRARKASSSDDEGGPRTLGGDGHRAEEASKDKE
GTCAAGAGTGCCACCTAGTCCTACACGGAGAGCACGGCGTCTGGAATTCAGGATGAGGTCAGAGCGGTTGGCGAGGAGCAAAGGTCAGAGGAGCCAAAGCGCAGGGTGGATACTTCAGTGTCTTGGGGGGCGTTGATTTGTGTCGGATCGTCAAAGAAGAGAGCGAGGAAGGCATCCTCTTCAGATGATGAATGAGGGCCAAGAACACTGGGAGTGGATGGCCACAGAGCGGAGGAGGCTAGCAAAGACAAAGAAG	GTCAAGAGTGCCACCTAGTCCTACACGGAGAGCACGGCGTCTGGAATTCAGGATGAGGTCAGAGCGGTTGGCGAGGAGCAAAGGTCAGAGGAGCCAAAGCGCAGGGTGGATACTTCAGTGTCTTGGGGGGCGTTGATTTGTGTCGGATCGTCAAAGAAGAGAGCGAGGAAGGCATCCTCTTCAGATGATGAATGAGGGCCAAGAACACTGGGAGTGGATGGCCACAGAGCGGAGGAGGCTAGCAAAGACAAAGAAG	1	7 Base Changes	VKSAT*	VKSATLSSTESTASGMQDEVRAVGEEQRSEEPKRRVDTSVSWEALICVGSSKKRARKASSSDDEGGPRTLGGDGHRAEEASKDKE
GTCAAGAGTGCCACCTAGTCCTCAACGGAGAGCACGGCGTCTGGAATGCAGGATGAGGTCAGAGCGGTTGGCGAGGAGCAAAGGTCAGAGGAGCCAAAGCGCAGGGTGGATACTTCAGTGTCTTGGGAGGCGTTGATTTGTGTCGGATCGTCCAAGAAGAGAGCGAGGAAGGCATCCTCTTCAGATGATGAAGGAGGGCCAAGAACACTGGGAGGGGATGGCCACAGAGCGGAGGAGGCTAGCAAAGACAAAGAAG	GTCAAGAGTGCCACCTAGTCCTCAACGGAGAGCACGGCGTCTGGAATGCAGGATGAGGTCAGAGCGGTTGGCGAGGAGCAAAGGTCAGAGGAGCCAAAGCGCAGGGTGGATACTTCAGTGTCTTGGGAGGCGTTGATTTGTGTCGGATCGTCCAAGAAGAGAGCGAGGAAGGCATCCTCTTCAGATGATGAAGGAGGGCCAAGAACACTGGGAGGGGATGGCCACAGAGCGGAGGAGGCTAGCAAAGACAAAGAAG	1	2 Base Changes	VKSAT*	VKSATLSSTESTASGMQDEVRAVGEEQRSEEPKRRVDTSVSWEALICVGSSKKRARKASSSDDEGGPRTLGGDGHRAEEASKDKE
GTCAAGAGTGCCACCTAGTCCTCAACGGAGAGCACGGCGTCTGGAATGCAGGATGAGGTCAGAGCGGTTGGCGAGGAGCAAAGGTCAGAGGAGCCAAAGCGCAGGGTGGATACTTCAGTGTCTTGGGAGGCGTTGATTTGTGTCGGATCGTCCAAGAAGAGAGCGAGGAAGGCATCCTCTTCAGATGATGAAGGAGGGCCAAGAACATTGGGAGGGGATGGCCACAGAGCGGAGGAGGCTAGCAAAGACAAAGAAG	GTCAAGAGTGCCACCTAGTCCTCAACGGAGAGCACGGCGTCTGGAATGCAGGATGAGGTCAGAGCGGTTGGCGAGGAGCAAAGGTCAGAGGAGCCAAAGCGCAGGGTGGATACTTCAGTGTCTTGGGAGGCGTTGATTTGTGTCGGATCGTCCAAGAAGAGAGCGAGGAAGGCATCCTCTTCAGATGATGAAGGAGGGCCAAGAACATTGGGAGGGGATGGCCACAGAGCGGAGGAGGCTAGCAAAGACAAAGAAG	1	3 Base Changes	VKSAT*	VKSATLSSTESTASGMQDEVRAVGEEQRSEEPKRRVDTSVSWEALICVGSSKKRARKASSSDDEGGPRTLGGDGHRAEEASKDKE
GTCAAGAGTGCCACCTAGTCCTCAACGGAGAGCACGGCGTCTGGAATGCATGATGAGGTCAGAGCGGTTGGCGAGGAGCAAAGGTCAGAGGAGCCAAAGCGCAGGGTGGATACTTCAGTGTCTTGGGAGGCGTTGATTTGTGTCGGATCGTCCAAGAAGAGAGCGAGGAAGGCATCCTCTTCAGATGATGAAGGAGGGCCAAGAACACTGGGAGGGGATGGCCACAGAGCGGAGGAGGCTAGCAAAGACAAAGAAG	GTCAAGAGTGCCACCTAGTCCTCAACGGAGAGCACGGCGTCTGGAATGCATGATGAGGTCAGAGCGGTTGGCGAGGAGCAAAGGTCAGAGGAGCCAAAGCGCAGGGTGGATACTTCAGTGTCTTGGGAGGCGTTGATTTGTGTCGGATCGTCCAAGAAGAGAGCGAGGAAGGCATCCTCTTCAGATGATGAAGGAGGGCCAAGAACACTGGGAGGGGATGGCCACAGAGCGGAGGAGGCTAGCAAAGACAAAGAAG	1	3 Base Changes	VKSAT*	VKSATLSSTESTASGMQDEVRAVGEEQRSEEPKRRVDTSVSWEALICVGSSKKRARKASSSDDEGGPRTLGGDGHRAEEASKDKE
GTCAAGAGTGCCACCTAGTCCTCCACAGAGAGCACGGCGTCTGGAATGCAGGATGAGGTCAGAGCGGTTGGCGAGGAGCAAAGGTCAGAGGAGCCAAAGCGCAGGGTGGATACTTCAGTGTCTTGGGAGGCGTTGATTTGTGTCGGATCGTCCAAGAAGAGAGCGAGGAAGGCATCCTCTTCAGATGATGAAGGAGGGCCAAGAACACTGGGAGGGGATGGCCACAGAGCGGAGGAGGCTAGCAAAGACAAAGAAG	GTCAAGAGTGCCACCTAGTCCTCCACAGAGAGCACGGCGTCTGGAATGCAGGATGAGGTCAGAGCGGTTGGCGAGGAGCAAAGGTCAGAGGAGCCAAAGCGCAGGGTGGATACTTCAGTGTCTTGGGAGGCGTTGATTTGTGTCGGATCGTCCAAGAAGAGAGCGAGGAAGGCATCCTCTTCAGATGATGAAGGAGGGCCAAGAACACTGGGAGGGGATGGCCACAGAGCGGAGGAGGCTAGCAAAGACAAAGAAG	1	2 Base Changes	VKSAT*	VKSATLSSTESTASGMQDEVRAVGEEQRSEEPKRRVDTSVSWEALICVGSSKKRARKASSSDDEGGPRTLGGDGHRAEEASKDKE
GTCAAGAGTGCCACCTAGTCCTCCACGGACACCACCGCGTCTGGAATGCAGGAAGAGGACAGAGCGGTTGGCCAGGAGCAAAGGTCAGAGGAGCCAAAGCGCAGGGTGGATACTTCAGTGACTTGGGAGGCGATGAGTTGTGTCGGATCGTCCAAGACCAGAGCGAGCAACGCATCCTCTCCACAAGCGCAACCACGGCCCAGAACACGGGGAGGGGATGGCCACAGAGCGGAGGAGGCTAGCAAAGACAAAGAAG	GTCAAGAGTGCCACCTAGTCCTCCACGGACACCACCGCGTCTGGAATGCAGGAAGAGGACAGAGCGGTTGGCCAGGAGCAAAGGTCAGAGGAGCCAAAGCGCAGGGTGGATACTTCAGTGACTTGGGAGGCGATGAGTTGTGTCGGATCGTCCAAGACCAGAGCGAGCAACGCATCCTCTCCACAAGCGCAACCACGGCCCAGAACACGGGGAGGGGATGGCCACAGAGCGGAGGAGGCTAGCAAAGACAAAGAAG	1	25 Base Changes	VKSAT*	VKSATLSSTESTASGMQDEVRAVGEEQRSEEPKRRVDTSVSWEALICVGSSKKRARKASSSDDEGGPRTLGGDGHRAEEASKDKE
GTCAAGAGTGCCACCTAGTCCTCCACGGAGAGCACGGAGTCTGGAATGCAGGATGAGGTCAGAGCGGTTGGCGATGAGCAAAGGTCAGAGGAGCCAAAGCGCAGGGTGGATACTTCAGTGTCTTGGGAGGCGTTGATTTGTGTCGTATCGTCCAAGAAGAGAGCGAGGAAGGCATCCTCTTCAGATGATGAAGGAGGGCCAAGAACACTGGGAGGGGATGGCCACAGAGCGGAGGAGGCTAGCAAAGACAAAGAAG	GTCAAGAGTGCCACCTAGTCCTCCACGGAGAGCACGGAGTCTGGAATGCAGGATGAGGTCAGAGCGGTTGGCGATGAGCAAAGGTCAGAGGAGCCAAAGCGCAGGGTGGATACTTCAGTGTCTTGGGAGGCGTTGATTTGTGTCGTATCGTCCAAGAAGAGAGCGAGGAAGGCATCCTCTTCAGATGATGAAGGAGGGCCAAGAACACTGGGAGGGGATGGCCACAGAGCGGAGGAGGCTAGCAAAGACAAAGAAG	1	4 Base Changes	VKSAT*	VKSATLSSTESTASGMQDEVRAVGEEQRSEEPKRRVDTSVSWEALICVGSSKKRARKASSSDDEGGPRTLGGDGHRAEEASKDKE
GTCAAGAGTGCCACCTAGTCCTCCACGGAGAGCACGGCGTCTGGAAAGCAGGATGAGGTCAGAGCGGTTGGCGAGGAGCAAAGGTCAGAGGAGCCAAAGCGCAGGGTGGATACTTCAGTGTCTTGGGAGGCGTTGATTTGTGTCGGATCGTCCAAGAAGAGAGCGAGGAAGGCATCCTCTTCAGATGATGAAGGAGGGACAAGAACACTGGGAGGGGATGGCCACAGAGCGGAGGAGGCTAGCAAAGACAAAGAAG	GTCAAGAGTGCCACCTAGTCCTCCACGGAGAGCACGGCGTCTGGAAAGCAGGATGAGGTCAGAGCGGTTGGCGAGGAGCAAAGGTCAGAGGAGCCAAAGCGCAGGGTGGATACTTCAGTGTCTTGGGAGGCGTTGATTTGTGTCGGATCGTCCAAGAAGAGAGCGAGGAAGGCATCCTCTTCAGATGATGAAGGAGGGACAAGAACACTGGGAGGGGATGGCCACAGAGCGGAGGAGGCTAGCAAAGACAAAGAAG	1	3 Base Changes	VKSAT*	VKSATLSSTESTASGMQDEVRAVGEEQRSEEPKRRVDTSVSWEALICVGSSKKRARKASSSDDEGGPRTLGGDGHRAEEASKDKE
GTCAAGAGTGCCACCTAGTCCTCCACGGAGAGCACGGCGTCTGGAATCCAGGATGAGGTCAGAGCGGTTGGCGAGGAGCAAAGGTCAGAGGAGCCAAAGAGCAGGCTGGATACTTCAGTGTCTTGTGAGGAGTTGATTTGTGTCGGATCGTCCAAGAAGAGAGCGAGTAAGGCATCCTCTTCAGATGATGAAGTACGGCCAAGAACACTGGGAGGGGATGGCCAAAGAGCGGAGGAGGCTAGCAATGACAAAGAAG	GTCAAGAGTGCCACCTAGTCCTCCACGGAGAGCACGGCGTCTGGAATCCAGGATGAGGTCAGAGCGGTTGGCGAGGAGCAAAGGTCAGAGGAGCCAAAGAGCAGGCTGGATACTTCAGTGTCTTGTGAGGAGTTGATTTGTGTCGGATCGTCCAAGAAGAGAGCGAGTAAGGCATCCTCTTCAGATGATGAAGTACGGCCAAGAACACTGGGAGGGGATGGCCAAAGAGCGGAGGAGGCTAGCAATGACAAAGAAG	1	11 Base Changes	VKSAT*	VKSATLSSTESTASGMQDEVRAVGEEQRSEEPKRRVDTSVSWEALICVGSSKKRARKASSSDDEGGPRTLGGDGHRAEEASKDKE
GTCAAGAGTGCCACCTAGTCCTCCACGGAGAGCACGGCGTCTGGAATGCAAGATGAGGTCAGAGCGGTTGGCGAGGAGCAAAGGTCAGAGGAGCCAAAGCGCAGGGTGGATACTTCAGTGTCTTGGGAGGCGTTGATTTGTGTCCGATCGTCCAAGAAGAGAGCGAGGAAGGCATCCTCTTCAGATGATGAAGGAGGGCCAAGAACACTGTGAGGGGATGGCAACAGAGCGGAGGAGGCTAGCAAAGACAAAGAAG	GTCAAGAGTGCCACCTAGTCCTCCACGGAGAGCACGGCGTCTGGAATGCAAGATGAGGTCAGAGCGGTTGGCGAGGAGCAAAGGTCAGAGGAGCCAAAGCGCAGGGTGGATACTTCAGTGTCTTGGGAGGCGTTGATTTGTGTCCGATCGTCCAAGAAGAGAGCGAGGAAGGCATCCTCTTCAGATGATGAAGGAGGGCCAAGAACACTGTGAGGGGATGGCAACAGAGCGGAGGAGGCTAGCAAAGACAAAGAAG	1	5 Base Changes	VKSAT*	VKSATLSSTESTASGMQDEVRAVGEEQRSEEPKRRVDTSVSWEALICVGSSKKRARKASSSDDEGGPRTLGGDGHRAEEASKDKE
GTCAAGAGTGCCACCTAGTCCTCCACGGAGAGCACGGCGTCTGGAATGCAGGATGAGGTCAGAGAGGTTGGCGAGGAGCAAAGGTCAGAGGAGCCAAAGCGCAGGGTGGATACTTCAGTGTCTTGGGAGGCGTTGATTTGTGTCGGATCGTCCAAGAAGAGAGCGAGGAAGGCATCCTATTCAGATGATGAAGGAGGGCCAAGAACACTGGGAGGCGATGGCCACAGAGCGGAGGAGGCTAGCAAAGACAAAGAAG	GTCAAGAGTGCCACCTAGTCCTCCACGGAGAGCACGGCGTCTGGAATGCAGGATGAGGTCAGAGAGGTTGGCGAGGAGCAAAGGTCAGAGGAGCCAAAGCGCAGGGTGGATACTTCAGTGTCTTGGGAGGCGTTGATTTGTGTCGGATCGTCCAAGAAGAGAGCGAGGAAGGCATCCTATTCAGATGATGAAGGAGGGCCAAGAACACTGGGAGGCGATGGCCACAGAGCGGAGGAGGCTAGCAAAGACAAAGAAG	1	4 Base Changes	VKSAT*	VKSATLSSTESTASGMQDEVRAVGEEQRSEEPKRRVDTSVSWEALICVGSSKKRARKASSSDDEGGPRTLGGDGHRAEEASKDKE
GTCAAGAGTGCCACCTAGTCCTCCACGGAGAGCACGGCGTCTGGAATGCAGGATGAGGTCAGAGCGGCTGGCGATGAGCAAAGGTCAGAGGAGCCAAAGCGCAGGGTGGATACTTCAGTGTCTTGGGAGGCGTTGATTTGTGTCGGATCGTCCAAGAAGAGAGCGAGGAAGGCATCCTCTTCAGATTATGAAGGAGGGCCAAGAACACTGGGAGGGGATGGCCACAGAGCGGAGGAGGCTAGCAAAGACAAAGAAG	GTCAAGAGTGCCACCTAGTCCTCCACGGAGAGCACGGCGTCTGGAATGCAGGATGAGGTCAGAGCGGCTGGCGATGAGCAAAGGTCAGAGGAGCCAAAGCGCAGGGTGGATACTTCAGTGTCTTGGGAGGCGTTGATTTGTGTCGGATCGTCCAAGAAGAGAGCGAGGAAGGCATCCTCTTCAGATTATGAAGGAGGGCCAAGAACACTGGGAGGGGATGGCCACAGAGCGGAGGAGGCTAGCAAAGACAAAGAAG	1	4 Base Changes	VKSAT*	VKSATLSSTESTASGMQDEVRAVGEEQRSEEPKRRVDTSVSWEALICVGSSKKRARKASSSDDEGGPRTLGGDGHRAEEASKDKE
GTCAAGAGTGCCACCTAGTCCTCCACGGAGAGCACGGCGTCTGGAATGCAGGATGAGGTCAGAGCGGTGGGCGAGGAGCAAAGGTCAGAGGAGCCAAAGCGCAGGGTGGATACTTCAGTGTCTTGGGAGGCGTTGAGTTGTGTCGGATCGTCCAAGAAGAGAGCGAGGAAGGCATCCTCTTCAGATGATGAAGGAGGGCCAAGAACACTGGGAGGGGATGGCCACAGAGCGGAGGAGGCTAGCAAAGGCAAAGAAG	GTCAAGAGTGCCACCTAGTCCTCCACGGAGAGCACGGCGTCTGGAATGCAGGATGAGGTCAGAGCGGTGGGCGAGGAGCAAAGGTCAGAGGAGCCAAAGCGCAGGGTGGATACTTCAGTGTCTTGGGAGGCGTTGAGTTGTGTCGGATCGTCCAAGAAGAGAGCGAGGAAGGCATCCTCTTCAGATGATGAAGGAGGGCCAAGAACACTGGGAGGGGATGGCCACAGAGCGGAGGAGGCTAGCAAAGGCAAAGAAG	1	4 Base Changes	VKSAT*	VKSATLSSTESTASGMQDEVRAVGEEQRSEEPKRRVDTSVSWEALICVGSSKKRARKASSSDDEGGPRTLGGDGHRAEEASKDKE
GTCAAGAGTGCCACCTAGTCCTCCACGGAGAGCACGGCGTCTGGAATGCAGGATGAGGTCAGAGCGGTTGGCGAGGAGAAAAGGTCAGAGGAGCCAAAGCGCAGGGTGGATACTTCAGTGTCTTGGGAGGCGTTGATTTGTGTCGGATCGTCCAAGAAGAGAGCGAGGAAGGCATCCTCTTCAGATGATGAAGGAGGGCCAAGAACACTGGGAGGGGATGGCCACAGAGCGGAGGAGGCTAGCAAAGACAAAGAAG	GTCAAGAGTGCCACCTAGTCCTCCACGGAGAGCACGGCGTCTGGAATGCAGGATGAGGTCAGAGCGGTTGGCGAGGAGAAAAGGTCAGAGGAGCCAAAGCGCAGGGTGGATACTTCAGTGTCTTGGGAGGCGTTGATTTGTGTCGGATCGTCCAAGAAGAGAGCGAGGAAGGCATCCTCTTCAGATGATGAAGGAGGGCCAAGAACACTGGGAGGGGATGGCCACAGAGCGGAGGAGGCTAGCAAAGACAAAGAAG	1	2 Base Changes	VKSAT*	VKSATLSSTESTASGMQDEVRAVGEEQRSEEPKRRVDTSVSWEALICVGSSKKRARKASSSDDEGGPRTLGGDGHRAEEASKDKE
GTCAAGAGTGCCACCTAGTCCTCCACGGAGAGCACGGCGTCTGGAATGCAGGATGAGGTCAGAGCGGTTGGCGAGGAGCAAAGGTCAGAGGAGACAAAGCGCAGGGTGGATACTTCAGTGTCTTTGGAGGCGTTGATTTGTGTCGGATCGTCCAAGAAGAGAGCGAGGAGGGCATCCTCTTCAGATGATGAAGGGGGGCCAAGAACACTGGGAGGGGATGGACACAGAGCGGAGGAGGCTAGCAAAGACAAAGAAG	GTCAAGAGTGCCACCTAGTCCTCCACGGAGAGCACGGCGTCTGGAATGCAGGATGAGGTCAGAGCGGTTGGCGAGGAGCAAAGGTCAGAGGAGACAAAGCGCAGGGTGGATACTTCAGTGTCTTTGGAGGCGTTGATTTGTGTCGGATCGTCCAAGAAGAGAGCGAGGAGGGCATCCTCTTCAGATGATGAAGGGGGGCCAAGAACACTGGGAGGGGATGGACACAGAGCGGAGGAGGCTAGCAAAGACAAAGAAG	1	6 Base Changes	VKSAT*	VKSATLSSTESTASGMQDEVRAVGEEQRSEEPKRRVDTSVSWEALICVGSSKKRARKASSSDDEGGPRTLGGDGHRAEEASKDKE
GTCAAGAGTGCCACCTAGTCCTCCACGGAGAGCACGGCGTCTGGAATGCAGGATGAGGTCAGAGCGGTTGGCGAGGAGCAAAGGTCAGAGGAGCCAAAGCGAAGGGTGGATACTTCAGTGTCTTGGGAGGCGTTGATTTGTGTCGGATCGTCCAAGAAGAGAGCGAGGAAGGCATCCTCTTCAGATGATGAAGGAGGGCCAAGAACACTGGGAGGGGATGGCCACAGAGCGGAGGAGGCTAGCAAAGACAAAGAAG	GTCAAGAGTGCCACCTAGTCCTCCACGGAGAGCACGGCGTCTGGAATGCAGGATGAGGTCAGAGCGGTTGGCGAGGAGCAAAGGTCAGAGGAGCCAAAGCGAAGGGTGGATACTTCAGTGTCTTGGGAGGCGTTGATTTGTGTCGGATCGTCCAAGAAGAGAGCGAGGAAGGCATCCTCTTCAGATGATGAAGGAGGGCCAAGAACACTGGGAGGGGATGGCCACAGAGCGGAGGAGGCTAGCAAAGACAAAGAAG	1	2 Base Changes	VKSAT*	VKSATLSSTESTASGMQDEVRAVGEEQRSEEPKRRVDTSVSWEALICVGSSKKRARKASSSDDEGGPRTLGGDGHRAEEASKDKE
GTCAAGAGTGCCACCTAGTCCTCCACGGAGAGCACGGCGTCTGGAATGCAGGATGAGGTCAGAGCGGTTGGCGAGGAGCAAAGGTCAGAGGAGCCAAAGCGCAGGGTGCATACTTCAGTGTCTTGGGAGGCGTTGATTTGTGTCGGATCGTCCAAGAAGAGAGCGAGGAAGGCATCCTCTTCAGATGATGAAGGAGGGCCAAGAACACTGGGAGGGGATGGCCACAGAGCTGAGGAGGCTAGCAAAGACAAAGAAG	GTCAAGAGTGCCACCTAGTCCTCCACGGAGAGCACGGCGTCTGGAATGCAGGATGAGGTCAGAGCGGTTGGCGAGGAGCAAAGGTCAGAGGAGCCAAAGCGCAGGGTGCATACTTCAGTGTCTTGGGAGGCGTTGATTTGTGTCGGATCGTCCAAGAAGAGAGCGAGGAAGGCATCCTCTTCAGATGATGAAGGAGGGCCAAGAACACTGGGAGGGGATGGCCACAGAGCTGAGGAGGCTAGCAAAGACAAAGAAG	1	3 Base Changes	VKSAT*	VKSATLSSTESTASGMQDEVRAVGEEQRSEEPKRRVDTSVSWEALICVGSSKKRARKASSSDDEGGPRTLGGDGHRAEEASKDKE
GTCAAGAGTGCCACCTAGTCCTCCACGGAGAGCACGGCGTCTGGAATGCAGGATGAGGTCAGAGCGGTTGGCGAGGAGCAAAGGTCAGAGGAGCCAAAGCGCAGGGTGGATACTTCAGTGTCTTGGGAGGCGTTGATTTGTGTAGGATCGTACAAGAAGAGAGCGAGGAAGGCATCCTCTTCAGATGATGAAGTAGGGCCAAGAACACTGGGAGGGGATGGCCACAGAGCGGAGGAGGCTAGCAAAGACAAAGAAG	GTCAAGAGTGCCACCTAGTCCTCCACGGAGAGCACGGCGTCTGGAATGCAGGATGAGGTCAGAGCGGTTGGCGAGGAGCAAAGGTCAGAGGAGCCAAAGCGCAGGGTGGATACTTCAGTGTCTTGGGAGGCGTTGATTTGTGTAGGATCGTACAAGAAGAGAGCGAGGAAGGCATCCTCTTCAGATGATGAAGTAGGGCCAAGAACACTGGGAGGGGATGGCCACAGAGCGGAGGAGGCTAGCAAAGACAAAGAAG	1	4 Base Changes	VKSAT*	VKSATLSSTESTASGMQDEVRAVGEEQRSEEPKRRVDTSVSWEALICVGSSKKRARKASSSDDEGGPRTLGGDGHRAEEASKDKE
GTCAAGAGTGCCACCTAGTCCTCCACGGAGAGCACGGCGTCTGGAATGCAGGATGAGGTCAGAGCGGTTGGCGAGGAGCAAAGGTCAGAGGAGCCAAAGCGCAGGGTGGATACTTCAGTGTCTTGGGAGGCGTTGATTTGTGTCGGATCGTCAAAGAAGAGAGCGAGGAAGGCATCCTCTTCAGATGATGAAGGAGGGCCAAGAACACTGGGAGGGGATGGCCACAGAGCGGAGGAGGCTAGCAAAGACAAAGAAG	GTCAAGAGTGCCACCTAGTCCTCCACGGAGAGCACGGCGTCTGGAATGCAGGATGAGGTCAGAGCGGTTGGCGAGGAGCAAAGGTCAGAGGAGCCAAAGCGCAGGGTGGATACTTCAGTGTCTTGGGAGGCGTTGATTTGTGTCGGATCGTCAAAGAAGAGAGCGAGGAAGGCATCCTCTTCAGATGATGAAGGAGGGCCAAGAACACTGGGAGGGGATGGCCACAGAGCGGAGGAGGCTAGCAAAGACAAAGAAG	1	2 Base Changes	VKSAT*	VKSATLSSTESTASGMQDEVRAVGEEQRSEEPKRRVDTSVSWEALICVGSSKKRARKASSSDDEGGPRTLGGDGHRAEEASKDKE
GTCAAGAGTGCCACCTAGTCCTCCACGGAGAGCACGGCGTCTGGAATGCAGGATGAGGTCAGAGCGGTTGGCGAGGAGCAAAGGTCAGAGGAGCCAAAGCGCAGGGTGGATACTTCAGTGTCTTGGGAGGCGTTGATTTGTGTCGGATCGTCCAAGAAGAGAGCGAGGAAGGCATCCCCTTCAGATGATGAAGGAGGGCCAAGAACACTGGGAGGGGATGGCCACAGAGCGGAGGAGGCTAGCAAAGACAAAGAAG	GTCAAGAGTGCCACCTAGTCCTCCACGGAGAGCACGGCGTCTGGAATGCAGGATGAGGTCAGAGCGGTTGGCGAGGAGCAAAGGTCAGAGGAGCCAAAGCGCAGGGTGGATACTTCAGTGTCTTGGGAGGCGTTGATTTGTGTCGGATCGTCCAAGAAGAGAGCGAGGAAGGCATCCCCTTCAGATGATGAAGGAGGGCCAAGAACACTGGGAGGGGATGGCCACAGAGCGGAGGAGGCTAGCAAAGACAAAGAAG	1	2 Base Changes	VKSAT*	VKSATLSSTESTASGMQDEVRAVGEEQRSEEPKRRVDTSVSWEALICVGSSKKRARKASSSDDEGGPRTLGGDGHRAEEASKDKE
GTCAAGAGTGCCACCTAGTCCTCCACGGAGAGCACGGCGTCTGGAATGCAGGATGAGGTCAGAGCGGTTGGCGAGGAGCAAAGGTCAGAGGAGCCAAAGCGCAGGGTGGATACTTCAGTGTCTTGGGAGGCGTTGATTTGTGTCGGATCGTCCAAGAAGAGAGCGAGGAAGGCATCCTATTCAGATGATGAAGGAGGGCCAAGAACACTGGGAGGGGATGGCCACAGAGCGGAGGAGGCTAGCAAAGACAAAGAAG	GTCAAGAGTGCCACCTAGTCCTCCACGGAGAGCACGGCGTCTGGAATGCAGGATGAGGTCAGAGCGGTTGGCGAGGAGCAAAGGTCAGAGGAGCCAAAGCGCAGGGTGGATACTTCAGTGTCTTGGGAGGCGTTGATTTGTGTCGGATCGTCCAAGAAGAGAGCGAGGAAGGCATCCTATTCAGATGATGAAGGAGGGCCAAGAACACTGGGAGGGGATGGCCACAGAGCGGAGGAGGCTAGCAAAGACAAAGAAG	1	2 Base Changes	VKSAT*	VKSATLSSTESTASGMQDEVRAVGEEQRSEEPKRRVDTSVSWEALICVGSSKKRARKASSSDDEGGPRTLGGDGHRAEEASKDKE
GTCAAGAGTGCCACCTAGTCCTCCACGGAGAGCACGGCGTCTGGAATGCAGGATGAGGTCAGAGCGGTTGGCGAGGAGCAAAGGTCAGAGGAGCCAAAGCGCAGGGTGGATACTTCAGTGTCTTGGGAGGCGTTGATTTGTGTCGGATCGTCCAAGAAGAGAGCGAGGAAGGCATCCTCTTAAGATGATGAAGGAGGGCCAAGAACACTGGGAGGGGATGGCCACAGAGCGGAGTAGGCTAGCAAAGACAAAGAAG	GTCAAGAGTGCCACCTAGTCCTCCACGGAGAGCACGGCGTCTGGAATGCAGGATGAGGTCAGAGCGGTTGGCGAGGAGCAAAGGTCAGAGGAGCCAAAGCGCAGGGTGGATACTTCAGTGTCTTGGGAGGCGTTGATTTGTGTCGGATCGTCCAAGAAGAGAGCGAGGAAGGCATCCTCTTAAGATGATGAAGGAGGGCCAAGAACACTGGGAGGGGATGGCCACAGAGCGGAGTAGGCTAGCAAAGACAAAGAAG	1	3 Base Changes	VKSAT*	VKSATLSSTESTASGMQDEVRAVGEEQRSEEPKRRVDTSVSWEALICVGSSKKRARKASSSDDEGGPRTLGGDGHRAEEASKDKE
GTCAAGAGTGCCACCTAGTCCTCCACGGAGAGCACGGCGTCTGGAATGCAGGATGAGGTCAGAGCGGTTGGCGAGGAGCAAAGGTCAGAGGAGCCAAAGCGCAGGGTGGATACTTCAGTGTCTTGGGAGGCGTTGATTTGTGTCGGATCGTCCAAGAAGAGAGCGAGGAAGGCATCCTCTTCAGATGATGAAGGAGGGCCAAGAACACTGGGAGGGGATGGACACAGAGCGGAGGAGGCTAGCAAAGACAAAGAAG	GTCAAGAGTGCCACCTAGTCCTCCACGGAGAGCACGGCGTCTGGAATGCAGGATGAGGTCAGAGCGGTTGGCGAGGAGCAAAGGTCAGAGGAGCCAAAGCGCAGGGTGGATACTTCAGTGTCTTGGGAGGCGTTGATTTGTGTCGGATCGTCCAAGAAGAGAGCGAGGAAGGCATCCTCTTCAGATGATGAAGGAGGGCCAAGAACACTGGGAGGGGATGGACACAGAGCGGAGGAGGCTAGCAAAGACAAAGAAG	1	2 Base Changes	VKSAT*	VKSATLSSTESTASGMQDEVRAVGEEQRSEEPKRRVDTSVSWEALICVGSSKKRARKASSSDDEGGPRTLGGDGHRAEEASKDKE
GTCAAGAGTGCCACCTAGTCCTCCACGGAGAGCACGGCGTCTGGAATGCAGGATGAGGTCAGAGCGGTTGGCGAGGAGCAAAGGTCAGAGGAGCCAAAGCGCAGGGTGGATACTTCAGTGTCTTGGGAGGCGTTGATTTGTGTCGGATCGTCCAAGAAGAGAGCGAGGAAGGCATCCTCTTCAGATGATGAAGGAGGGCCAAGAACACTGGGAGGGGATGGCAACAGAGCGGAGGAGGCTAGCAATGACAAAGAAG	GTCAAGAGTGCCACCTAGTCCTCCACGGAGAGCACGGCGTCTGGAATGCAGGATGAGGTCAGAGCGGTTGGCGAGGAGCAAAGGTCAGAGGAGCCAAAGCGCAGGGTGGATACTTCAGTGTCTTGGGAGGCGTTGATTTGTGTCGGATCGTCCAAGAAGAGAGCGAGGAAGGCATCCTCTTCAGATGATGAAGGAGGGCCAAGAACACTGGGAGGGGATGGCAACAGAGCGGAGGAGGCTAGCAATGACAAAGAAG	1	3 Base Changes	VKSAT*	VKSATLSSTESTASGMQDEVRAVGEEQRSEEPKRRVDTSVSWEALICVGSSKKRARKASSSDDEGGPRTLGGDGHRAEEASKDKE
GTCAAGAGTGCCACCTAGTCCTCCACGGAGAGCACGGCGTCTGGAATGCAGGATGAGGTCAGAGCGGTTGGCGAGGAGCAAAGGTCAGAGGAGCCAAAGCGCAGGGTGGATACTTCAGTGTCTTGGGAGGCGTTGATTTGTGTCGGATCGTCCAAGAAGAGAGCGAGGAAGGCATCCTCTTCAGATGATGAAGGAGGGCCAAGAACACTGGGAGGGGATGGCCACAGAACGGAGGAGGCTAGCAAAGACAAAGAAG	GTCAAGAGTGCCACCTAGTCCTCCACGGAGAGCACGGCGTCTGGAATGCAGGATGAGGTCAGAGCGGTTGGCGAGGAGCAAAGGTCAGAGGAGCCAAAGCGCAGGGTGGATACTTCAGTGTCTTGGGAGGCGTTGATTTGTGTCGGATCGTCCAAGAAGAGAGCGAGGAAGGCATCCTCTTCAGATGATGAAGGAGGGCCAAGAACACTGGGAGGGGATGGCCACAGAACGGAGGAGGCTAGCAAAGACAAAGAAG	1	2 Base Changes	VKSAT*	VKSATLSSTESTASGMQDEVRAVGEEQRSEEPKRRVDTSVSWEALICVGSSKKRARKASSSDDEGGPRTLGGDGHRAEEASKDKE
GTCAAGAGTGCCACCTAGTCCTCCACGGAGAGCACGGCGTCTGGAATGCAGGATGAGGTCAGAGCGGTTGGCGAGGAGCAAAGGTCAGAGGAGCCAAAGCGCAGGGTGGATACTTCAGTGTCTTGGGAGGCGTTGATTTGTGTCGGATCGTCCAAGAAGAGAGCGAGGAAGGCATCCTCTTCAGATGATGAAGGAGGGCCAAGAACACTGGGAGGGGATGGCCACAGAGCGGAGGAGGATAGCAAAGACAAAGAAG	GTCAAGAGTGCCACCTAGTCCTCCACGGAGAGCACGGCGTCTGGAATGCAGGATGAGGTCAGAGCGGTTGGCGAGGAGCAAAGGTCAGAGGAGCCAAAGCGCAGGGTGGATACTTCAGTGTCTTGGGAGGCGTTGATTTGTGTCGGATCGTCCAAGAAGAGAGCGAGGAAGGCATCCTCTTCAGATGATGAAGGAGGGCCAAGAACACTGGGAGGGGATGGCCACAGAGCGGAGGAGGATAGCAAAGACAAAGAAG	1	2 Base Changes	VKSAT*	VKSATLSSTESTASGMQDEVRAVGEEQRSEEPKRRVDTSVSWEALICVGSSKKRARKASSSDDEGGPRTLGGDGHRAEEASKDKE
GTCAAGAGTGCCACCTAGTCCTCCACGGAGAGCACGGCGTCTGGAATGCAGGATGAGGTCAGAGCGGTTGGCGAGGAGCAAAGGTCAGAGGAGCCAAAGCGCAGGGTGGATACTTCAGTGTCTTGGGAGGCGTTGATTTGTGTCGGATCGTCCAAGAAGAGAGCGAGGAAGGCATCCTCTTCAGATGATGAAGGAGGGCCAAGAACACTGGGAGGGGATGGCCACAGAGCGGAGGAGGCCAGCAAAGACAAAGAAG	GTCAAGAGTGCCACCTAGTCCTCCACGGAGAGCACGGCGTCTGGAATGCAGGATGAGGTCAGAGCGGTTGGCGAGGAGCAAAGGTCAGAGGAGCCAAAGCGCAGGGTGGATACTTCAGTGTCTTGGGAGGCGTTGATTTGTGTCGGATCGTCCAAGAAGAGAGCGAGGAAGGCATCCTCTTCAGATGATGAAGGAGGGCCAAGAACACTGGGAGGGGATGGCCACAGAGCGGAGGAGGCCAGCAAAGACAAAGAAG	1	2 Base Changes	VKSAT*	VKSATLSSTESTASGMQDEVRAVGEEQRSEEPKRRVDTSVSWEALICVGSSKKRARKASSSDDEGGPRTLGGDGHRAEEASKDKE
GTCAAGAGTGCCACCTAGTCCTCCACGGAGAGCACGGCGTCTGGAATGCAGGATGAGGTCAGAGCGGTTGGCGAGGAGCAAAGGTCAGAGGAGCCAAAGCGCAGGGTGGATACTTCAGTGTCTTGGGAGGCGTTGATTTGTGTCGGATCGTCCAAGAAGAGAGCGAGGAAGGCATCCTCTTCAGATGATGAAGGAGGGCCAAGAACACTGGGAGGGGATGGCCACAGAGCGGAGGAGGCTAGCTAAGACAAAGAAG	GTCAAGAGTGCCACCTAGTCCTCCACGGAGAGCACGGCGTCTGGAATGCAGGATGAGGTCAGAGCGGTTGGCGAGGAGCAAAGGTCAGAGGAGCCAAAGCGCAGGGTGGATACTTCAGTGTCTTGGGAGGCGTTGATTTGTGTCGGATCGTCCAAGAAGAGAGCGAGGAAGGCATCCTCTTCAGATGATGAAGGAGGGCCAAGAACACTGGGAGGGGATGGCCACAGAGCGGAGGAGGCTAGCTAAGACAAAGAAG	1	2 Base Changes	VKSAT*	VKSATLSSTESTASGMQDEVRAVGEEQRSEEPKRRVDTSVSWEALICVGSSKKRARKASSSDDEGGPRTLGGDGHRAEEASKDKE
GTCAAGAGTGCCACCTAGTCCTCCACGGAGAGCACGGCGTCTGGAATGCAGGATGAGGTCAGAGCGGTTGGCGAGGAGCAAAGGTCAGAGGAGCCAAAGCGCAGGGTGGATACTTCAGTGTCTTGGGAGGCGTTGATTTGTGTCGGATCGTCCAAGAAGAGAGCGAGGAAGGCATCCTCTTCAGATGATGAAGGAGGGCCAAGAACACTGGGAGGGGATGGCCACGGAGCGGAGGAGGCTAGCAAAGACAAAGAAG	GTCAAGAGTGCCACCTAGTCCTCCACGGAGAGCACGGCGTCTGGAATGCAGGATGAGGTCAGAGCGGTTGGCGAGGAGCAAAGGTCAGAGGAGCCAAAGCGCAGGGTGGATACTTCAGTGTCTTGGGAGGCGTTGATTTGTGTCGGATCGTCCAAGAAGAGAGCGAGGAAGGCATCCTCTTCAGATGATGAAGGAGGGCCAAGAACACTGGGAGGGGATGGCCACGGAGCGGAGGAGGCTAGCAAAGACAAAGAAG	1	2 Base Changes	VKSAT*	VKSATLSSTESTASGMQDEVRAVGEEQRSEEPKRRVDTSVSWEALICVGSSKKRARKASSSDDEGGPRTLGGDGHRAEEASKDKE
GTCAAGAGTGCCACCTAGTCCTCCACGGAGAGCACGGCGTCTGGAATGCAGGATGAGGTCAGAGCGGTTGGCGAGGAGCAAAGGTCAGAGGAGCCAAAGCGCAGGGTGGATACTTCAGTGTCTTGGGAGGCGTTGATTTGTGTCGGATCGTCCAAGAAGAGAGCGAGGAAGGCATCCTCTTCAGATGATGAAGGAGGGCCAAGAACACTGGGAGGGGATGGCCACTGAGCTGAGGAGGCTAGCAAAGACAAAGAAG	GTCAAGAGTGCCACCTAGTCCTCCACGGAGAGCACGGCGTCTGGAATGCAGGATGAGGTCAGAGCGGTTGGCGAGGAGCAAAGGTCAGAGGAGCCAAAGCGCAGGGTGGATACTTCAGTGTCTTGGGAGGCGTTGATTTGTGTCGGATCGTCCAAGAAGAGAGCGAGGAAGGCATCCTCTTCAGATGATGAAGGAGGGCCAAGAACACTGGGAGGGGATGGCCACTGAGCTGAGGAGGCTAGCAAAGACAAAGAAG	1	3 Base Changes	VKSAT*	VKSATLSSTESTASGMQDEVRAVGEEQRSEEPKRRVDTSVSWEALICVGSSKKRARKASSSDDEGGPRTLGGDGHRAEEASKDKE
GTCAAGAGTGCCACCTAGTCCTCCACGGAGAGCACGGCGTCTGGAATGCAGGATGAGGTCAGAGCGGTTGGCGAGGAGCAAAGGTCAGAGGAGCCAAAGCGCAGGGTGGATACTTCAGTGTCTTGGGAGGCGTTGATTTGTGTCGGATCGTCCAAGAAGAGAGCGAGGAAGGCATCCTCTTCAGATGATGAAGGAGGGCCAAGAACACTGGGAGTGGATGGCCACAGAGCGGAGGAGGCTAGCAAAGACAAAGAAG	GTCAAGAGTGCCACCTAGTCCTCCACGGAGAGCACGGCGTCTGGAATGCAGGATGAGGTCAGAGCGGTTGGCGAGGAGCAAAGGTCAGAGGAGCCAAAGCGCAGGGTGGATACTTCAGTGTCTTGGGAGGCGTTGATTTGTGTCGGATCGTCCAAGAAGAGAGCGAGGAAGGCATCCTCTTCAGATGATGAAGGAGGGCCAAGAACACTGGGAGTGGATGGCCACAGAGCGGAGGAGGCTAGCAAAGACAAAGAAG	1	2 Base Changes	VKSAT*	VKSATLSSTESTASGMQDEVRAVGEEQRSEEPKRRVDTSVSWEALICVGSSKKRARKASSSDDEGGPRTLGGDGHRAEEASKDKE
GTCAAGAGTGCCACCTAGTCCTCCACGGAGAGCACGGCGTCTGGAATGCAGGATGAGGTCAGAGCGGTTGGCGAGGAGCAAAGGTCAGAGGAGCCAAAGCGCAGGGTGGATACTTCAGTGTCTTGGGAGGCGTTGATTTGTGTCGGATCGTCCAAGAAGAGAGCGAGGAAGGCGTCCTCTTCAGATGATGAAGGAGGGCCAAGAACACTGGGAGGGGATGGCCACAGAGCGGAGGAGGCTAGCAAAGACAAAGAAG	GTCAAGAGTGCCACCTAGTCCTCCACGGAGAGCACGGCGTCTGGAATGCAGGATGAGGTCAGAGCGGTTGGCGAGGAGCAAAGGTCAGAGGAGCCAAAGCGCAGGGTGGATACTTCAGTGTCTTGGGAGGCGTTGATTTGTGTCGGATCGTCCAAGAAGAGAGCGAGGAAGGCGTCCTCTTCAGATGATGAAGGAGGGCCAAGAACACTGGGAGGGGATGGCCACAGAGCGGAGGAGGCTAGCAAAGACAAAGAAG	1	2 Base Changes	VKSAT*	VKSATLSSTESTASGMQDEVRAVGEEQRSEEPKRRVDTSVSWEALICVGSSKKRARKASSSDDEGGPRTLGGDGHRAEEASKDKE
GTCAAGAGTGCCACCTAGTCCTCCACGGAGAGCACGGCGTCTGGAATGCAGGATGAGGTCAGAGCGGTTGGCGAGGAGCAAAGGTCAGAGGAGCCAAAGCGCAGGGTGGATACTTCAGTGTCTTGGGAGGCGTTGATTTGTGTCGGATCGTCCAAGAAGAGAGCGAGGCAGGCATCCTCTTCAGATGATGAAGGAGGGCCAAGAACACTGGGAGGGGATGGCCACAGAGCGGAGGAGGCTAGCAAAGACAAAGAAG	GTCAAGAGTGCCACCTAGTCCTCCACGGAGAGCACGGCGTCTGGAATGCAGGATGAGGTCAGAGCGGTTGGCGAGGAGCAAAGGTCAGAGGAGCCAAAGCGCAGGGTGGATACTTCAGTGTCTTGGGAGGCGTTGATTTGTGTCGGATCGTCCAAGAAGAGAGCGAGGCAGGCATCCTCTTCAGATGATGAAGGAGGGCCAAGAACACTGGGAGGGGATGGCCACAGAGCGGAGGAGGCTAGCAAAGACAAAGAAG	1	2 Base Changes	VKSAT*	VKSATLSSTESTASGMQDEVRAVGEEQRSEEPKRRVDTSVSWEALICVGSSKKRARKASSSDDEGGPRTLGGDGHRAEEASKDKE
GTCAAGAGTGCCACCTAGTCCTCCACGGAGAGCACGGCGTCTGGAATGCAGGATGAGGTCAGAGCGGTTGGCGAGGAGCAAAGGTCAGAGGAGCCAAAGCGCAGGGTGGATACTTCAGTGTCTTGGGAGGCGTTGATTTGTGTCGGATCGTCCAAGAAGAGATCGAGGAAGGCATCCTCTTCAGATGATGAAGGAGGGCCAAGAACACTGGGAGGGGATGGCCACAGAGCGGAGGAGGCTAGCAAAGACAAAGAAG	GTCAAGAGTGCCACCTAGTCCTCCACGGAGAGCACGGCGTCTGGAATGCAGGATGAGGTCAGAGCGGTTGGCGAGGAGCAAAGGTCAGAGGAGCCAAAGCGCAGGGTGGATACTTCAGTGTCTTGGGAGGCGTTGATTTGTGTCGGATCGTCCAAGAAGAGATCGAGGAAGGCATCCTCTTCAGATGATGAAGGAGGGCCAAGAACACTGGGAGGGGATGGCCACAGAGCGGAGGAGGCTAGCAAAGACAAAGAAG	1	2 Base Changes	VKSAT*	VKSATLSSTESTASGMQDEVRAVGEEQRSEEPKRRVDTSVSWEALICVGSSKKRARKASSSDDEGGPRTLGGDGHRAEEASKDKE
GTCAAGAGTGCCACCTAGTCCTCCACGGAGAGCACGGCGTCTGGAATGCAGGATGAGGTCAGAGCGGTTGGCGAGGAGCAAAGGTCAGAGGAGCCAAAGCGCAGGGTGGATACTTCAGTGTCTTGGGAGGCGTTGATTTGTGTCGGATCGTCCAAGAAGGGAGCGAGGAAGGCATCCTCTTCAGATGAGGAAGGAGGGCCAAGAACACTGGGAGGGGATGGCCACAGAGCGGAGGAGGCTAGCAAAGACAAAGAAG	GTCAAGAGTGCCACCTAGTCCTCCACGGAGAGCACGGCGTCTGGAATGCAGGATGAGGTCAGAGCGGTTGGCGAGGAGCAAAGGTCAGAGGAGCCAAAGCGCAGGGTGGATACTTCAGTGTCTTGGGAGGCGTTGATTTGTGTCGGATCGTCCAAGAAGGGAGCGAGGAAGGCATCCTCTTCAGATGAGGAAGGAGGGCCAAGAACACTGGGAGGGGATGGCCACAGAGCGGAGGAGGCTAGCAAAGACAAAGAAG	1	3 Base Changes	VKSAT*	VKSATLSSTESTASGMQDEVRAVGEEQRSEEPKRRVDTSVSWEALICVGSSKKRARKASSSDDEGGPRTLGGDGHRAEEASKDKE
GTCAAGAGTGCCACCTAGTCCTCCACGGAGAGCACGGCGTCTGGAATGCAGGATGAGGTCAGAGCGGTTGGCGAGGAGCAAAGGTCAGAGGAGCCAAAGCGCAGGGTGGATACTTCTGTGTCTTGGGAGGCGTTGATTTGTGTCGGATCGTCCAAGAAGAGAGCGAGGAAGGCATCCTCTTCAGATGATGAAGGAGGGCCAAGAACACTGGGAGGGGATGGCCACAGAGCGGAGGAGGCTAGCAAAGACAAAGAAG	GTCAAGAGTGCCACCTAGTCCTCCACGGAGAGCACGGCGTCTGGAATGCAGGATGAGGTCAGAGCGGTTGGCGAGGAGCAAAGGTCAGAGGAGCCAAAGCGCAGGGTGGATACTTCTGTGTCTTGGGAGGCGTTGATTTGTGTCGGATCGTCCAAGAAGAGAGCGAGGAAGGCATCCTCTTCAGATGATGAAGGAGGGCCAAGAACACTGGGAGGGGATGGCCACAGAGCGGAGGAGGCTAGCAAAGACAAAGAAG	1	2 Base Changes	VKSAT*	VKSATLSSTESTASGMQDEVRAVGEEQRSEEPKRRVDTSVSWEALICVGSSKKRARKASSSDDEGGPRTLGGDGHRAEEASKDKE
GTCAAGAGTGCCACCTAGTCCTCCACGGAGAGCACGGCGTCTGGAATGCAGGATGAGGTCAGAGCGGTTGGCGAGGAGCAAAGGTCAGAGGAGCCATAGCGCTGGGTGGATACTTCAGTGTCTTGGGAGGCGTTGATTTGTGTCGGATCGTCCAAGAAGAGAGCGAGGAAGGCATCCTCTTCAGATGATGAAGGAGGGCCAAGAACACTGGGAGGGGATGGCCACAGAGCGGAGGAGGCTAGCAAAGACAAAGAAG	GTCAAGAGTGCCACCTAGTCCTCCACGGAGAGCACGGCGTCTGGAATGCAGGATGAGGTCAGAGCGGTTGGCGAGGAGCAAAGGTCAGAGGAGCCATAGCGCTGGGTGGATACTTCAGTGTCTTGGGAGGCGTTGATTTGTGTCGGATCGTCCAAGAAGAGAGCGAGGAAGGCATCCTCTTCAGATGATGAAGGAGGGCCAAGAACACTGGGAGGGGATGGCCACAGAGCGGAGGAGGCTAGCAAAGACAAAGAAG	1	3 Base Changes	VKSAT*	VKSATLSSTESTASGMQDEVRAVGEEQRSEEPKRRVDTSVSWEALICVGSSKKRARKASSSDDEGGPRTLGGDGHRAEEASKDKE
GTCAAGAGTGCCACCTAGTCCTCCACGGAGAGCACGGCGTCTGGAATGCAGGATGAGGTCAGAGCGGTTGGCGAGGAGCAAAGGTCAGATGAGCCAAATCGCAGGGTGGATACTTCAGTGTCTTGGGAGGCGTTGATTTGTGTAGGATCGTCCAAGAAGAGAGCTAGGAAGGCATCCTCTTCAGATGGTGAAGGAGGGCCAAGAACACTGGGAGGGGATGGCCACAGAGCGGAGGAGGCTATCAAAGACAAAGAAG	GTCAAGAGTGCCACCTAGTCCTCCACGGAGAGCACGGCGTCTGGAATGCAGGATGAGGTCAGAGCGGTTGGCGAGGAGCAAAGGTCAGATGAGCCAAATCGCAGGGTGGATACTTCAGTGTCTTGGGAGGCGTTGATTTGTGTAGGATCGTCCAAGAAGAGAGCTAGGAAGGCATCCTCTTCAGATGGTGAAGGAGGGCCAAGAACACTGGGAGGGGATGGCCACAGAGCGGAGGAGGCTATCAAAGACAAAGAAG	1	7 Base Changes	VKSAT*	VKSATLSSTESTASGMQDEVRAVGEEQRSEEPKRRVDTSVSWEALICVGSSKKRARKASSSDDEGGPRTLGGDGHRAEEASKDKE
GTCAAGAGTGCCACCTAGTCCTCCACGGAGAGCACGGCGTCTGGAATGCAGGATGAGGTCAGAGCGGTTGGCGAGGAGCAAAGGTCATAGGAGCCAAAGCGCAGGGTGGATACTTCAGTGTCTTGGGAGGCGTTGATTTGTGTCGGATCGTCCAAGAAGAGAGCGAGGAAGGCATCCTCTTCAGATGATGAAGGAGGGCCAAGAACACTGGGAGGGGATGGCCACAGAGCGGAGGAGGCTAGCAAAGACAAAGAAG	GTCAAGAGTGCCACCTAGTCCTCCACGGAGAGCACGGCGTCTGGAATGCAGGATGAGGTCAGAGCGGTTGGCGAGGAGCAAAGGTCATAGGAGCCAAAGCGCAGGGTGGATACTTCAGTGTCTTGGGAGGCGTTGATTTGTGTCGGATCGTCCAAGAAGAGAGCGAGGAAGGCATCCTCTTCAGATGATGAAGGAGGGCCAAGAACACTGGGAGGGGATGGCCACAGAGCGGAGGAGGCTAGCAAAGACAAAGAAG	1	2 Base Changes	VKSAT*	VKSATLSSTESTASGMQDEVRAVGEEQRSEEPKRRVDTSVSWEALICVGSSKKRARKASSSDDEGGPRTLGGDGHRAEEASKDKE
GTCAAGAGTGCCACCTAGTCCTCCACGGAGAGCACGGCGTCTGGAATGCAGGATGAGGTCAGAGCGGTTGGCGGGGAGCAAAGGTCAGAGGAGCCAAAGCGCAGGGTGGATACTTCAGTGTCTTGGGAGGCGTTGATTTGTGTCGGATCGTCCAAGAAGAGAGCGAGGAAGGCATCCTCTTCAGATGATGAAGGAGGGCCAAGAACACTGGGAGGGGAAGGCCACAGAGCGGAGGAGGCTAGCAAAGACAAAGAAG	GTCAAGAGTGCCACCTAGTCCTCCACGGAGAGCACGGCGTCTGGAATGCAGGATGAGGTCAGAGCGGTTGGCGGGGAGCAAAGGTCAGAGGAGCCAAAGCGCAGGGTGGATACTTCAGTGTCTTGGGAGGCGTTGATTTGTGTCGGATCGTCCAAGAAGAGAGCGAGGAAGGCATCCTCTTCAGATGATGAAGGAGGGCCAAGAACACTGGGAGGGGAAGGCCACAGAGCGGAGGAGGCTAGCAAAGACAAAGAAG	1	3 Base Changes	VKSAT*	VKSATLSSTESTASGMQDEVRAVGEEQRSEEPKRRVDTSVSWEALICVGSSKKRARKASSSDDEGGPRTLGGDGHRAEEASKDKE
GTCAAGAGTGCCACCTAGTCCTCCACGGAGAGCACGGCGTCTGGAATGCAGGATGAGGTCAGAGCGGTTGTCGAGGAGCAAAGGTCAGAGGAGCCAAAGCGCAGGGTGGATACTTCAGTGTCTTGGGAGGCGTTGATTTGTGTCTGATCGTCCAAGAAAAGAGCGAGGAAGGCATCCTCTTCAGATGATGAAGGAGGGCCAAGAACACTGGGAGGGGATGGCCACTGAGCGGAGGAGGCTAGCAAAGACAAAGAAG	GTCAAGAGTGCCACCTAGTCCTCCACGGAGAGCACGGCGTCTGGAATGCAGGATGAGGTCAGAGCGGTTGTCGAGGAGCAAAGGTCAGAGGAGCCAAAGCGCAGGGTGGATACTTCAGTGTCTTGGGAGGCGTTGATTTGTGTCTGATCGTCCAAGAAAAGAGCGAGGAAGGCATCCTCTTCAGATGATGAAGGAGGGCCAAGAACACTGGGAGGGGATGGCCACTGAGCGGAGGAGGCTAGCAAAGACAAAGAAG	1	5 Base Changes	VKSAT*	VKSATLSSTESTASGMQDEVRAVGEEQRSEEPKRRVDTSVSWEALICVGSSKKRARKASSSDDEGGPRTLGGDGHRAEEASKDKE
GTCAAGAGTGCCACCTAGTCCTCCACGGAGAGCACGGCGTCTGGAATGCATGATGAGGTCAGAGCGGTTGGCGAGGAGCAAAGGTCAGAGGAGCCAAAGCGCAGGGTGGATACTTCAGTGTCTTGGGATGCGTTGATTTGTGTCGGATCGTCCAAGAAGAGAGCGAGGAAGGCATCCTCTTCAGATGATGAAGGAGGGCCAAGAACACTGGGAGGGGATGGCCACAGAGCTGAGGAGGCTAGAAATGACAAAGAAG	GTCAAGAGTGCCACCTAGTCCTCCACGGAGAGCACGGCGTCTGGAATGCATGATGAGGTCAGAGCGGTTGGCGAGGAGCAAAGGTCAGAGGAGCCAAAGCGCAGGGTGGATACTTCAGTGTCTTGGGATGCGTTGATTTGTGTCGGATCGTCCAAGAAGAGAGCGAGGAAGGCATCCTCTTCAGATGATGAAGGAGGGCCAAGAACACTGGGAGGGGATGGCCACAGAGCTGAGGAGGCTAGAAATGACAAAGAAG	1	6 Base Changes	VKSAT*	VKSATLSSTESTASGMQDEVRAVGEEQRSEEPKRRVDTSVSWEALICVGSSKKRARKASSSDDEGGPRTLGGDGHRAEEASKDKE
GTCAAGAGTGCCACCTAGTCCTCCACGGAGAGCACGGCGTCTGGAATTCAGGATGAGGTCAGAGCGGTTGGCGAGGAGAAAAGGTCAGAGGAGCCAAAGCGCAGGGTGGATACTTCAGTGTCTTGGGAGGCGTTGATTTGTGTCGGATCGTCCAAGAAGAGAGCGAGGAAGGCATCCTCTTCAGATGATGAAGGAGGGCCAAGAACACTGGGAGGGGATGGCCACAGAGCGGTGGAGGCTAGCAAAGTCAAAGAAG	GTCAAGAGTGCCACCTAGTCCTCCACGGAGAGCACGGCGTCTGGAATTCAGGATGAGGTCAGAGCGGTTGGCGAGGAGAAAAGGTCAGAGGAGCCAAAGCGCAGGGTGGATACTTCAGTGTCTTGGGAGGCGTTGATTTGTGTCGGATCGTCCAAGAAGAGAGCGAGGAAGGCATCCTCTTCAGATGATGAAGGAGGGCCAAGAACACTGGGAGGGGATGGCCACAGAGCGGTGGAGGCTAGCAAAGTCAAAGAAG	1	5 Base Changes	VKSAT*	VKSATLSSTESTASGMQDEVRAVGEEQRSEEPKRRVDTSVSWEALICVGSSKKRARKASSSDDEGGPRTLGGDGHRAEEASKDKE
GTCAAGAGTGCCACCTAGTCCTCCACGGAGAGCACTGCGTCTGGAATGCAGGATGAGGTCAGAGCGGTTGGCGAGGAGCAAAGGTCAGAGGAGCCAAAGCGCAGGGTGGATACTTCAGTGTCTTGGGAGGCGTTGATTTGTGTCGGATCGTCCAAGAAGAGAGCGAGGAAGGCATCCTCTTCAGATGATGAAGGAGGGCCAAGGACACTGGGAGGGGATGGCCACAGAGCGGAGGAGGCTAGCAAAGACAAAGAAG	GTCAAGAGTGCCACCTAGTCCTCCACGGAGAGCACTGCGTCTGGAATGCAGGATGAGGTCAGAGCGGTTGGCGAGGAGCAAAGGTCAGAGGAGCCAAAGCGCAGGGTGGATACTTCAGTGTCTTGGGAGGCGTTGATTTGTGTCGGATCGTCCAAGAAGAGAGCGAGGAAGGCATCCTCTTCAGATGATGAAGGAGGGCCAAGGACACTGGGAGGGGATGGCCACAGAGCGGAGGAGGCTAGCAAAGACAAAGAAG	1	3 Base Changes	VKSAT*	VKSATLSSTESTASGMQDEVRAVGEEQRSEEPKRRVDTSVSWEALICVGSSKKRARKASSSDDEGGPRTLGGDGHRAEEASKDKE
GTCAAGAGTGCCACCTAGTCCTCCACGGAGAGCAGGGCGTCTGGAATGCAGGATGAGGTCAGAGCGGTTGGCGAGGATCAAAGGTCAGAGGAGCCAAAGCGCAGGGTGGATACTTCAGTGTCTTGGGAGGCGTTGATTTGTGTCGGATCGTCCAAGAAGAGAGCGAGGAAGGCATCCTCTTCAGATGATGAAGGAGGGCCAAGAACACTGGGAGGGGATGGCCACAGAGCGGAGGAGGCTAGCAAAGACAAAGAAG	GTCAAGAGTGCCACCTAGTCCTCCACGGAGAGCAGGGCGTCTGGAATGCAGGATGAGGTCAGAGCGGTTGGCGAGGATCAAAGGTCAGAGGAGCCAAAGCGCAGGGTGGATACTTCAGTGTCTTGGGAGGCGTTGATTTGTGTCGGATCGTCCAAGAAGAGAGCGAGGAAGGCATCCTCTTCAGATGATGAAGGAGGGCCAAGAACACTGGGAGGGGATGGCCACAGAGCGGAGGAGGCTAGCAAAGACAAAGAAG	1	3 Base Changes	VKSAT*	VKSATLSSTESTASGMQDEVRAVGEEQRSEEPKRRVDTSVSWEALICVGSSKKRARKASSSDDEGGPRTLGGDGHRAEEASKDKE
GTCAAGAGTGCCACCTAGTCCTCCACGGAGATCACGGCGTCTGGAGTGCAGGATGAGGTCAGAGCGGTTGGCGAGGAGCAAAGGTCAGAGGAGCCAAAGCGCAGGGTGGATACTTCAGTGTCTTGGGAGGCGTTGATTTGTGTCGGATCGTCCAAGAAGAGAGCGAGGAAGGCATCCTCTTCAGATGATGAAGGAGGGCCAAGAACACTGGGAGGGGATGGCCACAGAGCGGAGGAGGCTAGCAAAGACAAAGAAG	GTCAAGAGTGCCACCTAGTCCTCCACGGAGATCACGGCGTCTGGAGTGCAGGATGAGGTCAGAGCGGTTGGCGAGGAGCAAAGGTCAGAGGAGCCAAAGCGCAGGGTGGATACTTCAGTGTCTTGGGAGGCGTTGATTTGTGTCGGATCGTCCAAGAAGAGAGCGAGGAAGGCATCCTCTTCAGATGATGAAGGAGGGCCAAGAACACTGGGAGGGGATGGCCACAGAGCGGAGGAGGCTAGCAAAGACAAAGAAG	1	3 Base Changes	VKSAT*	VKSATLSSTESTASGMQDEVRAVGEEQRSEEPKRRVDTSVSWEALICVGSSKKRARKASSSDDEGGPRTLGGDGHRAEEASKDKE
GTCAAGAGTGCCACCTATTCCTCCACGGAGATCACGGCGTCTGGAATGCAGGATGAGGTCAGAGCGGTTGGCGAGGAGCAAAGGTCAGAGGAGCCAAAGCGCAGGGTGGATAATTCAGTGCCTTGGGAGGCGTTGATTTGTGTCGGATAGTCCAAGAAGAGAGCGAGGAAGGCATCCTCTTCAGATGATGAAGGAGGGCCAAGAACACTGGGAGGGGATGGCCACAGAGCGGAGGAGGCTAGCAAAGACAAAGAAG	GTCAAGAGTGCCACCTATTCCTCCACGGAGATCACGGCGTCTGGAATGCAGGATGAGGTCAGAGCGGTTGGCGAGGAGCAAAGGTCAGAGGAGCCAAAGCGCAGGGTGGATAATTCAGTGCCTTGGGAGGCGTTGATTTGTGTCGGATAGTCCAAGAAGAGAGCGAGGAAGGCATCCTCTTCAGATGATGAAGGAGGGCCAAGAACACTGGGAGGGGATGGCCACAGAGCGGAGGAGGCTAGCAAAGACAAAGAAG	1	6 Base Changes	VKSATYSSTEITASGMQDEVRAVGEEQRSEEPKRRVDNSVPWEALICVG*	VKSATLSSTESTASGMQDEVRAVGEEQRSEEPKRRVDTSVSWEALICVGSSKKRARKASSSDDEGGPRTLGGDGHRAEEASKDKE
GTCAAGAGTGCCACCTCGCCCTCCACGGAGAGCACGGCGCCTGGAATGCAGGATGAGGTCAGAGCGGTTGGCGAGGAGCAAAGGTCAGAGGAGCCAAAGCGCAGGGTGGATACTTCAGTGTCTTGGGAGGCGTTGATTTGTGTCGGATCGTCCAAGAAGAGAGCGAGGAAGGCATCCTCTTCAGATGATGAAGGAGGGCCAAGAACACTGGGAGGGGATGGCCACAGAGCGGAGGAGGCTAGCAAAGACAAAGAAG	GTCAAGAGTGCCACCTCGCCCTCCACGGAGAGCACGGCGCCTGGAATGCAGGATGAGGTCAGAGCGGTTGGCGAGGAGCAAAGGTCAGAGGAGCCAAAGCGCAGGGTGGATACTTCAGTGTCTTGGGAGGCGTTGATTTGTGTCGGATCGTCCAAGAAGAGAGCGAGGAAGGCATCCTCTTCAGATGATGAAGGAGGGCCAAGAACACTGGGAGGGGATGGCCACAGAGCGGAGGAGGCTAGCAAAGACAAAGAAG	1	3 Base Changes	VKSATSPSTESTAPGMQDEVRAVGEEQRSEEPKRRVDTSVSWEALICVGSSKKRARKASSSDDEGGPRTLGGDGHRAEEASKDKE	VKSATLSSTESTASGMQDEVRAVGEEQRSEEPKRRVDTSVSWEALICVGSSKKRARKASSSDDEGGPRTLGGDGHRAEEASKDKE
GTCAAGAGTGCCACCTCGTCCCCCACGGAGAGCACGGCGTCTGGAATGCAGGATGAGGTCAGAGCGGTTGGCGAGGAGCAAAGGTCAGAGGAGCCAAAGCGCAGGGTGGATACTTCAGTGTCTTGGGAGGCGTTGATTTGTGTCGGATCGTCCAAGAAGAGAGCGAGGAAGGCATCCTCTTCAGATGATGAAGGAGGGCCAAGAACACTGGGAGGGGATGGCCACAGAGCGGAGGAGGCTAGCAAAGACAAAGAAG	GTCAAGAGTGCCACCTCGTCCCCCACGGAGAGCACGGCGTCTGGAATGCAGGATGAGGTCAGAGCGGTTGGCGAGGAGCAAAGGTCAGAGGAGCCAAAGCGCAGGGTGGATACTTCAGTGTCTTGGGAGGCGTTGATTTGTGTCGGATCGTCCAAGAAGAGAGCGAGGAAGGCATCCTCTTCAGATGATGAAGGAGGGCCAAGAACACTGGGAGGGGATGGCCACAGAGCGGAGGAGGCTAGCAAAGACAAAGAAG	1	2 Base Changes	VKSATSSPTESTASGMQDEVRAVGEEQRSEEPKRRVDTSVSWEALICVGSSKKRARKASSSDDEGGPRTLGGDGHRAEEASKDKE	VKSATLSSTESTASGMQDEVRAVGEEQRSEEPKRRVDTSVSWEALICVGSSKKRARKASSSDDEGGPRTLGGDGHRAEEASKDKE
GTCAAGAGTGCCACCTCGTCCTCAACGGAGAGCACGGCGTCTGGAATGCAGGATGAGGTCAGAGCGGTTGGCGAGGAGCAAAGGTCAGAGGAGCCAAAGCGCAGGGTGGATACTTCAGTGTCTTGGGAGGCGTTGATTTGTGTCGGATCGTCCAAGAAGAGAGCGAGGAAGGCATCCTCTTCAGATGATGAAGGAGGGCCAAGAACACTGGGAGGGGATGGCCACAGAGCGGAGGAGGCTAGCAAAGACAAAGAAG	GTCAAGAGTGCCACCTCGTCCTCAACGGAGAGCACGGCGTCTGGAATGCAGGATGAGGTCAGAGCGGTTGGCGAGGAGCAAAGGTCAGAGGAGCCAAAGCGCAGGGTGGATACTTCAGTGTCTTGGGAGGCGTTGATTTGTGTCGGATCGTCCAAGAAGAGAGCGAGGAAGGCATCCTCTTCAGATGATGAAGGAGGGCCAAGAACACTGGGAGGGGATGGCCACAGAGCGGAGGAGGCTAGCAAAGACAAAGAAG	1	2 Base Changes	VKSATSSSTESTASGMQDEVRAVGEEQRSEEPKRRVDTSVSWEALICVGSSKKRARKASSSDDEGGPRTLGGDGHRAEEASKDKE	VKSATLSSTESTASGMQDEVRAVGEEQRSEEPKRRVDTSVSWEALICVGSSKKRARKASSSDDEGGPRTLGGDGHRAEEASKDKE
GTCAAGAGTGCCACCTCGTCCTCCACGGAGAGCACGGCGTCTGGAATGCAGGATGAGGTCAAAGCGGTTGGCGAGGAGCAAAGGTCAGAGGAGCCAAAGCGCAGGGTGGATACTTCAGTGTCTTGGGAGGCGTTGATTTGTGTCGGATCGTCCAAGAAGAGAGCGAGGAAGGCATCCTCTTCAGATGATGAAGGAGGGCCAAGAACACTGGGAGGGGATGGCCACAGAGCGGAGGAGGCTAGCAAAGACAAAGAAG	GTCAAGAGTGCCACCTCGTCCTCCACGGAGAGCACGGCGTCTGGAATGCAGGATGAGGTCAAAGCGGTTGGCGAGGAGCAAAGGTCAGAGGAGCCAAAGCGCAGGGTGGATACTTCAGTGTCTTGGGAGGCGTTGATTTGTGTCGGATCGTCCAAGAAGAGAGCGAGGAAGGCATCCTCTTCAGATGATGAAGGAGGGCCAAGAACACTGGGAGGGGATGGCCACAGAGCGGAGGAGGCTAGCAAAGACAAAGAAG	1	2 Base Changes	VKSATSSSTESTASGMQDEVKAVGEEQRSEEPKRRVDTSVSWEALICVGSSKKRARKASSSDDEGGPRTLGGDGHRAEEASKDKE	VKSATLSSTESTASGMQDEVRAVGEEQRSEEPKRRVDTSVSWEALICVGSSKKRARKASSSDDEGGPRTLGGDGHRAEEASKDKE
GTCAAGAGTGCCACCTCGTCCTCCACGGAGAGCACGGCGTCTGGAATGCAGGATGAGGTCAGAGCGGTTGACGAGGAGCAAAGGTCAGAGGAGCCAAAGCGCAGGGTGGATACTTCAGTGTCTTGGGAGGCGTTGATTTGTGTCGGATCGTCCAAGAAGAGAGCGAGGAAGGCATCCTCTTCAGATGATGAAGGAGGGCCAAGAACACTGGGAGGGGATGGCCACAGAGCGGAGGAGGCTAGCAAAGACAAAGAAG	GTCAAGAGTGCCACCTCGTCCTCCACGGAGAGCACGGCGTCTGGAATGCAGGATGAGGTCAGAGCGGTTGACGAGGAGCAAAGGTCAGAGGAGCCAAAGCGCAGGGTGGATACTTCAGTGTCTTGGGAGGCGTTGATTTGTGTCGGATCGTCCAAGAAGAGAGCGAGGAAGGCATCCTCTTCAGATGATGAAGGAGGGCCAAGAACACTGGGAGGGGATGGCCACAGAGCGGAGGAGGCTAGCAAAGACAAAGAAG	1	2 Base Changes	VKSATSSSTESTASGMQDEVRAVDEEQRSEEPKRRVDTSVSWEALICVGSSKKRARKASSSDDEGGPRTLGGDGHRAEEASKDKE	VKSATLSSTESTASGMQDEVRAVGEEQRSEEPKRRVDTSVSWEALICVGSSKKRARKASSSDDEGGPRTLGGDGHRAEEASKDKE
GTCAAGAGTGCCACCTCGTCCTCCACGGAGAGCACGGCGTCTGGAATGCAGGATGAGGTCAGAGCGGTTGGCGAGGAGCAAAGGCCAGAGGAGCCAAAGCGCAGGGTGGGTACTTCAGTGTCTTGGGAGGCGTTGATTTGTGTCGGATCGTCCAAGAAGAGAGCGGGGAAGGCATCCTCTTCAGATGATGAAGGAGGGCCAAGAACACTGGGAGGGGATGGCCACAGAGCGGAGGAGGCTAGCAAAGACAAAGAAG	GTCAAGAGTGCCACCTCGTCCTCCACGGAGAGCACGGCGTCTGGAATGCAGGATGAGGTCAGAGCGGTTGGCGAGGAGCAAAGGCCAGAGGAGCCAAAGCGCAGGGTGGGTACTTCAGTGTCTTGGGAGGCGTTGATTTGTGTCGGATCGTCCAAGAAGAGAGCGGGGAAGGCATCCTCTTCAGATGATGAAGGAGGGCCAAGAACACTGGGAGGGGATGGCCACAGAGCGGAGGAGGCTAGCAAAGACAAAGAAG	1	4 Base Changes	VKSATSSSTESTASGMQDEVRAVGEEQRPEEPKRRVGTSVSWEALICVGSSKKRAGKASSSDDEGGPRTLGGDGHRAEEASKDKE	VKSATLSSTESTASGMQDEVRAVGEEQRSEEPKRRVDTSVSWEALICVGSSKKRARKASSSDDEGGPRTLGGDGHRAEEASKDKE
GTCAAGAGTGCCACCTCGTCCTCCACGGAGAGCACGGCGTCTGGAATGCAGGATGAGGTCAGAGCGGTTGGCGAGGAGCAAAGGTCAGAGGAGCCAAAACGCAGGGTGGATACTTCAGTGTCTTGGGAGGCGTTGATTTGTGTCGGATCGTCCAAGAAGAGAGCGAGGAAGGCATCCTCTTCAGATGATGAAGGAGGGCCAAGAACACTGGGAGGGGATGGCCACAGAGCGGAGGAGGCTAGCAAAGACAAAGAAG	GTCAAGAGTGCCACCTCGTCCTCCACGGAGAGCACGGCGTCTGGAATGCAGGATGAGGTCAGAGCGGTTGGCGAGGAGCAAAGGTCAGAGGAGCCAAAACGCAGGGTGGATACTTCAGTGTCTTGGGAGGCGTTGATTTGTGTCGGATCGTCCAAGAAGAGAGCGAGGAAGGCATCCTCTTCAGATGATGAAGGAGGGCCAAGAACACTGGGAGGGGATGGCCACAGAGCGGAGGAGGCTAGCAAAGACAAAGAAG	1	2 Base Changes	VKSATSSSTESTASGMQDEVRAVGEEQRSEEPKRRVDTSVSWEALICVGSSKKRARKASSSDDEGGPRTLGGDGHRAEEASKDKE	VKSATLSSTESTASGMQDEVRAVGEEQRSEEPKRRVDTSVSWEALICVGSSKKRARKASSSDDEGGPRTLGGDGHRAEEASKDKE
GTCAAGAGTGCCACCTCGTCCTCCACGGAGAGCACGGCGTCTGGAATGCAGGATGAGGTCAGAGCGGTTGGCGAGGAGCAAAGGTCAGAGGAGCCAAAGCGCAAGGTGGATACTTCAGTGTCTTGGGAGGCGTTGATTTGTGTCGGATCGTCCAAGAAGAGAGCGAGGAAGGCATCCTCTTCAGATGATGAAGGAGGGCCAAGAACACTGGGAGGGGATGGCCACAGAGCGGAGGAGGCTAGCAAAGACAAAGAAG	GTCAAGAGTGCCACCTCGTCCTCCACGGAGAGCACGGCGTCTGGAATGCAGGATGAGGTCAGAGCGGTTGGCGAGGAGCAAAGGTCAGAGGAGCCAAAGCGCAAGGTGGATACTTCAGTGTCTTGGGAGGCGTTGATTTGTGTCGGATCGTCCAAGAAGAGAGCGAGGAAGGCATCCTCTTCAGATGATGAAGGAGGGCCAAGAACACTGGGAGGGGATGGCCACAGAGCGGAGGAGGCTAGCAAAGACAAAGAAG	1	2 Base Changes	VKSATSSSTESTASGMQDEVRAVGEEQRSEEPKRKVDTSVSWEALICVGSSKKRARKASSSDDEGGPRTLGGDGHRAEEASKDKE	VKSATLSSTESTASGMQDEVRAVGEEQRSEEPKRRVDTSVSWEALICVGSSKKRARKASSSDDEGGPRTLGGDGHRAEEASKDKE
GTCAAGAGTGCCACCTCGTCCTCCACGGAGAGCACGGCGTCTGGAATGCAGGATGAGGTCAGAGCGGTTGGCGAGGAGCAAAGGTCAGAGGAGCCAAAGCGCAGGGTGGACACTTCAGTGTCTTGGGAGGCGTTGATTTGTGTCGGATCGTCCAAGAGGAGAGCGAGGAAGGCATCCTCTTCAGATGATGAAGGAGGGCCAAGAACACTGGGAGGGGATGGCCACAGAGCGGAGGAGGCTAGCAAAGACAAAGAAG	GTCAAGAGTGCCACCTCGTCCTCCACGGAGAGCACGGCGTCTGGAATGCAGGATGAGGTCAGAGCGGTTGGCGAGGAGCAAAGGTCAGAGGAGCCAAAGCGCAGGGTGGACACTTCAGTGTCTTGGGAGGCGTTGATTTGTGTCGGATCGTCCAAGAGGAGAGCGAGGAAGGCATCCTCTTCAGATGATGAAGGAGGGCCAAGAACACTGGGAGGGGATGGCCACAGAGCGGAGGAGGCTAGCAAAGACAAAGAAG	1	3 Base Changes	VKSATSSSTESTASGMQDEVRAVGEEQRSEEPKRRVDTSVSWEALICVGSSKRRARKASSSDDEGGPRTLGGDGHRAEEASKDKE	VKSATLSSTESTASGMQDEVRAVGEEQRSEEPKRRVDTSVSWEALICVGSSKKRARKASSSDDEGGPRTLGGDGHRAEEASKDKE
GTCAAGAGTGCCACCTCGTCCTCCACGGAGAGCACGGCGTCTGGAATGCAGGATGAGGTCAGAGCGGTTGGCGAGGAGCAAAGGTCAGAGGAGCCAAAGCGCAGGGTGGATACTTCAGTGCCTTGGGAGGCGTTGATTTGTGTCGGATCGTCCAAGAAGAGAGCGAGGAAGGCATCCTCTTCAGATGATGAAGGAGGGCCAAGAACACTGGGAGGGGATGGCTACAGAGCGGAGGAGGCTAGCAAAGACAAAGAAG	GTCAAGAGTGCCACCTCGTCCTCCACGGAGAGCACGGCGTCTGGAATGCAGGATGAGGTCAGAGCGGTTGGCGAGGAGCAAAGGTCAGAGGAGCCAAAGCGCAGGGTGGATACTTCAGTGCCTTGGGAGGCGTTGATTTGTGTCGGATCGTCCAAGAAGAGAGCGAGGAAGGCATCCTCTTCAGATGATGAAGGAGGGCCAAGAACACTGGGAGGGGATGGCTACAGAGCGGAGGAGGCTAGCAAAGACAAAGAAG	1	3 Base Changes	VKSATSSSTESTASGMQDEVRAVGEEQRSEEPKRRVDTSVPWEALICVGSSKKRARKASSSDDEGGPRTLGGDGYRAEEASKDKE	VKSATLSSTESTASGMQDEVRAVGEEQRSEEPKRRVDTSVSWEALICVGSSKKRARKASSSDDEGGPRTLGGDGHRAEEASKDKE
GTCAAGAGTGCCACCTCGTCCTCCACGGAGAGCACGGCGTCTGGAATGCAGGATGAGGTCAGAGCGGTTGGCGAGGAGCAAAGGTCAGAGGAGCCAAAGCGCAGGGTGGATACTTCAGTGTCTTGGGAGGCGGTGATTTGTGTCGGATCGTCCAAGAAGAGAGCGAGGAAGGCATCCTCTTCAGATGATGAAGGAGGGCCAAGAACACTGGGAGGGGATGGCCACAGAGCGGAGGAGGCTAGCAAAGACAAAGAAG	GTCAAGAGTGCCACCTCGTCCTCCACGGAGAGCACGGCGTCTGGAATGCAGGATGAGGTCAGAGCGGTTGGCGAGGAGCAAAGGTCAGAGGAGCCAAAGCGCAGGGTGGATACTTCAGTGTCTTGGGAGGCGGTGATTTGTGTCGGATCGTCCAAGAAGAGAGCGAGGAAGGCATCCTCTTCAGATGATGAAGGAGGGCCAAGAACACTGGGAGGGGATGGCCACAGAGCGGAGGAGGCTAGCAAAGACAAAGAAG	1	2 Base Changes	VKSATSSSTESTASGMQDEVRAVGEEQRSEEPKRRVDTSVSWEAVICVGSSKKRARKASSSDDEGGPRTLGGDGHRAEEASKDKE	VKSATLSSTESTASGMQDEVRAVGEEQRSEEPKRRVDTSVSWEALICVGSSKKRARKASSSDDEGGPRTLGGDGHRAEEASKDKE
GTCAAGAGTGCCACCTCGTCCTCCACGGAGAGCACGGCGTCTGGAATGCAGGATGAGGTCAGAGCGGTTGGCGAGGAGCAAAGGTCAGAGGAGCCAAAGCGCAGGGTGGATACTTCAGTGTCTTGGGAGGCGTTGATTTGAGTCGGATCGTCCAAGAAGAGAGCGAGGAAGGCATCCTCTTCAGATGATGAAGGAGGGCCAAGAACACTGGGAGGGGATGGCCACAGAGCGGAGGAGGCTAGCAAAGACAAAGAAG	GTCAAGAGTGCCACCTCGTCCTCCACGGAGAGCACGGCGTCTGGAATGCAGGATGAGGTCAGAGCGGTTGGCGAGGAGCAAAGGTCAGAGGAGCCAAAGCGCAGGGTGGATACTTCAGTGTCTTGGGAGGCGTTGATTTGAGTCGGATCGTCCAAGAAGAGAGCGAGGAAGGCATCCTCTTCAGATGATGAAGGAGGGCCAAGAACACTGGGAGGGGATGGCCACAGAGCGGAGGAGGCTAGCAAAGACAAAGAAG	1	2 Base Changes	VKSATSSSTESTASGMQDEVRAVGEEQRSEEPKRRVDTSVSWEALI*	VKSATLSSTESTASGMQDEVRAVGEEQRSEEPKRRVDTSVSWEALICVGSSKKRARKASSSDDEGGPRTLGGDGHRAEEASKDKE
GTCAAGAGTGCCACCTCGTCCTCCACGGAGAGCACGGCGTCTGGAATGCAGGATGAGGTCAGAGCGGTTGGCGAGGAGCAAAGGTCAGAGGAGCCAAAGCGCAGGGTGGATACTTCAGTGTCTTGGGAGGCGTTGATTTGTGTCGGATCGTCCAAGAAGAGAGCGAGGAAGGCAACCTCTTCAGATGATGAAGGAGGGCCAAGAACACTGGGAGGGGATGGCCACAGAGCGGAGGAGGCTAGCAAAGACAAAGAAG	GTCAAGAGTGCCACCTCGTCCTCCACGGAGAGCACGGCGTCTGGAATGCAGGATGAGGTCAGAGCGGTTGGCGAGGAGCAAAGGTCAGAGGAGCCAAAGCGCAGGGTGGATACTTCAGTGTCTTGGGAGGCGTTGATTTGTGTCGGATCGTCCAAGAAGAGAGCGAGGAAGGCAACCTCTTCAGATGATGAAGGAGGGCCAAGAACACTGGGAGGGGATGGCCACAGAGCGGAGGAGGCTAGCAAAGACAAAGAAG	1	2 Base Changes	VKSATSSSTESTASGMQDEVRAVGEEQRSEEPKRRVDTSVSWEALICVGSSKKRARKATSSDDEGGPRTLGGDGHRAEEASKDKE	VKSATLSSTESTASGMQDEVRAVGEEQRSEEPKRRVDTSVSWEALICVGSSKKRARKASSSDDEGGPRTLGGDGHRAEEASKDKE
GTCAAGAGTGCCACCTCGTCCTCCACGGAGAGCACGGCGTCTGGAATGCAGGATGAGGTCAGAGCGGTTGGCGAGGAGCAAAGGTCAGAGGAGCCAAAGCGCAGGGTGGATACTTCAGTGTCTTGGGAGGCGTTGATTTGTGTCGGATCGTCCAAGAAGAGAGCGAGGAAGGCATCCTCTGCAGATGATGAAGGAGGGCCAAGAACACTGGGAGGGGATGGCCACAGAGCGGAGGAGGCTAGCAAAGACAAAGAAG	GTCAAGAGTGCCACCTCGTCCTCCACGGAGAGCACGGCGTCTGGAATGCAGGATGAGGTCAGAGCGGTTGGCGAGGAGCAAAGGTCAGAGGAGCCAAAGCGCAGGGTGGATACTTCAGTGTCTTGGGAGGCGTTGATTTGTGTCGGATCGTCCAAGAAGAGAGCGAGGAAGGCATCCTCTGCAGATGATGAAGGAGGGCCAAGAACACTGGGAGGGGATGGCCACAGAGCGGAGGAGGCTAGCAAAGACAAAGAAG	1	2 Base Changes	VKSATSSSTESTASGMQDEVRAVGEEQRSEEPKRRVDTSVSWEALICVGSSKKRARKASSADDEGGPRTLGGDGHRAEEASKDKE	VKSATLSSTESTASGMQDEVRAVGEEQRSEEPKRRVDTSVSWEALICVGSSKKRARKASSSDDEGGPRTLGGDGHRAEEASKDKE
GTCAAGAGTGCCACCTCGTCCTCCACGGAGAGCACGGCGTCTGGAATGCAGGATGAGGTCAGAGCGGTTGGCGAGGAGCAAAGGTCAGAGGAGCCAAAGCGCAGGGTGGATACTTCAGTGTCTTGGGAGGCGTTGATTTGTGTCGGATCGTCCAAGAAGAGAGCGAGGAAGGCATCCTCTTCAGACGATGAAGGAGGGCCAAGAACACTGGGAGGGGATGGCCACAGAGCGGAGGAGGCTAGCAAAGACAAAGAAG	GTCAAGAGTGCCACCTCGTCCTCCACGGAGAGCACGGCGTCTGGAATGCAGGATGAGGTCAGAGCGGTTGGCGAGGAGCAAAGGTCAGAGGAGCCAAAGCGCAGGGTGGATACTTCAGTGTCTTGGGAGGCGTTGATTTGTGTCGGATCGTCCAAGAAGAGAGCGAGGAAGGCATCCTCTTCAGACGATGAAGGAGGGCCAAGAACACTGGGAGGGGATGGCCACAGAGCGGAGGAGGCTAGCAAAGACAAAGAAG	1	2 Base Changes	VKSATSSSTESTASGMQDEVRAVGEEQRSEEPKRRVDTSVSWEALICVGSSKKRARKASSSDDEGGPRTLGGDGHRAEEASKDKE	VKSATLSSTESTASGMQDEVRAVGEEQRSEEPKRRVDTSVSWEALICVGSSKKRARKASSSDDEGGPRTLGGDGHRAEEASKDKE
GTCAAGAGTGCCACCTCGTCCTCCACGGAGAGCACGGCGTCTGGAATGCAGGATGAGGTCAGAGCGGTTGGCGAGGAGCAAAGGTCAGAGGAGCCAAAGCGCAGGGTGGATACTTCAGTGTCTTGGGAGGCGTTGATTTGTGTCGGATCGTCCAAGAAGAGAGCGAGGAAGGCATCCTCTTCAGATGATAAAGGAGGGCCAAGAACACTGGGAGGGGATGGCCACAGAGCGGAGGAGGCTAGCAAAGACAAAGAAG	GTCAAGAGTGCCACCTCGTCCTCCACGGAGAGCACGGCGTCTGGAATGCAGGATGAGGTCAGAGCGGTTGGCGAGGAGCAAAGGTCAGAGGAGCCAAAGCGCAGGGTGGATACTTCAGTGTCTTGGGAGGCGTTGATTTGTGTCGGATCGTCCAAGAAGAGAGCGAGGAAGGCATCCTCTTCAGATGATAAAGGAGGGCCAAGAACACTGGGAGGGGATGGCCACAGAGCGGAGGAGGCTAGCAAAGACAAAGAAG	1	2 Base Changes	VKSATSSSTESTASGMQDEVRAVGEEQRSEEPKRRVDTSVSWEALICVGSSKKRARKASSSDDKGGPRTLGGDGHRAEEASKDKE	VKSATLSSTESTASGMQDEVRAVGEEQRSEEPKRRVDTSVSWEALICVGSSKKRARKASSSDDEGGPRTLGGDGHRAEEASKDKE
GTCAAGAGTGCCACCTCGTCCTCCACGGAGAGCACGGCGTCTGGAATGCAGGATGAGGTCAGAGCGGTTGGCGAGGAGCAAAGGTCAGAGGAGCCAAAGCGCAGGGTGGATACTTCAGTGTCTTGGGAGGCGTTGATTTGTGTCGGATCGTCCAAGAAGAGAGCGAGGAAGGCATCCTCTTCAGATGATGAAGGAGGGCCAAGAACACCGGGAGGGGATGGCCACAGAGCGGAGGAGGCTAGCAAAGACAAAGAAG	GTCAAGAGTGCCACCTCGTCCTCCACGGAGAGCACGGCGTCTGGAATGCAGGATGAGGTCAGAGCGGTTGGCGAGGAGCAAAGGTCAGAGGAGCCAAAGCGCAGGGTGGATACTTCAGTGTCTTGGGAGGCGTTGATTTGTGTCGGATCGTCCAAGAAGAGAGCGAGGAAGGCATCCTCTTCAGATGATGAAGGAGGGCCAAGAACACCGGGAGGGGATGGCCACAGAGCGGAGGAGGCTAGCAAAGACAAAGAAG	1	2 Base Changes	VKSATSSSTESTASGMQDEVRAVGEEQRSEEPKRRVDTSVSWEALICVGSSKKRARKASSSDDEGGPRTPGGDGHRAEEASKDKE	VKSATLSSTESTASGMQDEVRAVGEEQRSEEPKRRVDTSVSWEALICVGSSKKRARKASSSDDEGGPRTLGGDGHRAEEASKDKE
GTCAAGAGTGCCACCTCGTCCTCCACGGAGAGCACGGCGTCTGGAATGCAGGATGAGGTCAGAGCGGTTGGCGAGGAGCAAAGGTCAGAGGAGCCAAAGCGCAGGGTGGATACTTCAGTGTCTTGGGAGGCGTTGATTTGTGTCGGATCGTCCAAGAAGAGAGCGAGGAAGGCATCCTCTTCAGATGATGAAGGAGGGCCAAGAACACTGGGAGAGGATGGCCACAGAGCGGAGGAGGCTAGCAAAGACGAAGAAG	GTCAAGAGTGCCACCTCGTCCTCCACGGAGAGCACGGCGTCTGGAATGCAGGATGAGGTCAGAGCGGTTGGCGAGGAGCAAAGGTCAGAGGAGCCAAAGCGCAGGGTGGATACTTCAGTGTCTTGGGAGGCGTTGATTTGTGTCGGATCGTCCAAGAAGAGAGCGAGGAAGGCATCCTCTTCAGATGATGAAGGAGGGCCAAGAACACTGGGAGAGGATGGCCACAGAGCGGAGGAGGCTAGCAAAGACGAAGAAG	1	3 Base Changes	VKSATSSSTESTASGMQDEVRAVGEEQRSEEPKRRVDTSVSWEALICVGSSKKRARKASSSDDEGGPRTLGEDGHRAEEASKDEE	VKSATLSSTESTASGMQDEVRAVGEEQRSEEPKRRVDTSVSWEALICVGSSKKRARKASSSDDEGGPRTLGGDGHRAEEASKDKE
GTCAAGAGTGCCACCTCGTCCTCCACGGAGAGCACGGCGTCTGGAATGCAGGATGAGGTCAGAGCGGTTGGCGAGGAGCAAAGGTCAGAGGAGCCAAAGCGCAGGGTGGATACTTCAGTGTCTTGGGAGGCGTTGATTTGTGTCGGATCGTCCAAGAAGAGAGCGAGGAAGGCATCCTCTTCAGATGATGAAGGAGGGCCAAGAACACTGGGAGGGGACGGCCACAGAGCGGAGGAGGCTAGCAAAGACAAAGAAG	GTCAAGAGTGCCACCTCGTCCTCCACGGAGAGCACGGCGTCTGGAATGCAGGATGAGGTCAGAGCGGTTGGCGAGGAGCAAAGGTCAGAGGAGCCAAAGCGCAGGGTGGATACTTCAGTGTCTTGGGAGGCGTTGATTTGTGTCGGATCGTCCAAGAAGAGAGCGAGGAAGGCATCCTCTTCAGATGATGAAGGAGGGCCAAGAACACTGGGAGGGGACGGCCACAGAGCGGAGGAGGCTAGCAAAGACAAAGAAG	1	2 Base Changes	VKSATSSSTESTASGMQDEVRAVGEEQRSEEPKRRVDTSVSWEALICVGSSKKRARKASSSDDEGGPRTLGGDGHRAEEASKDKE	VKSATLSSTESTASGMQDEVRAVGEEQRSEEPKRRVDTSVSWEALICVGSSKKRARKASSSDDEGGPRTLGGDGHRAEEASKDKE
GTCAAGAGTGCCACCTCGTCCTCCACGGAGAGCACGGCGTCTGGAATGCAGGATGAGGTCAGAGCGGTTGGCGAGGAGCAAAGGTCAGAGGAGCCAAAGCGCAGGGTGGATACTTCAGTGTCTTGGGAGGCGTTGATTTGTGTCGGATCGTCCAAGAAGAGAGCGAGGAAGGCATCCTCTTCAGATGATGAAGGAGGGCCAAGAACACTGGGAGGGGAGGGCCACAGAGCGGAGGAGGCTAGCAAAGACAAAGAAG	GTCAAGAGTGCCACCTCGTCCTCCACGGAGAGCACGGCGTCTGGAATGCAGGATGAGGTCAGAGCGGTTGGCGAGGAGCAAAGGTCAGAGGAGCCAAAGCGCAGGGTGGATACTTCAGTGTCTTGGGAGGCGTTGATTTGTGTCGGATCGTCCAAGAAGAGAGCGAGGAAGGCATCCTCTTCAGATGATGAAGGAGGGCCAAGAACACTGGGAGGGGAGGGCCACAGAGCGGAGGAGGCTAGCAAAGACAAAGAAG	1	2 Base Changes	VKSATSSSTESTASGMQDEVRAVGEEQRSEEPKRRVDTSVSWEALICVGSSKKRARKASSSDDEGGPRTLGGEGHRAEEASKDKE	VKSATLSSTESTASGMQDEVRAVGEEQRSEEPKRRVDTSVSWEALICVGSSKKRARKASSSDDEGGPRTLGGDGHRAEEASKDKE
GTCAAGAGTGCCACCTCGTCCTCCACGGAGAGCACGGCGTCTGGAATGCAGGATGAGGTCAGAGCGGTTGGCGAGGAGCAAAGGTCAGAGGAGCCAAAGCGCAGGGTGGATACTTCAGTGTCTTGGGAGGCGTTGATTTGTGTCGGATCGTCCAAGAAGAGAGCGAGGAAGGCATCCTCTTCAGATGATGAAGGAGGGCCAAGAACACTGGGAGGGGATGGCCACAGAGCGGAGGAGGCTAGCAAAGATAAAGAAG	GTCAAGAGTGCCACCTCGTCCTCCACGGAGAGCACGGCGTCTGGAATGCAGGATGAGGTCAGAGCGGTTGGCGAGGAGCAAAGGTCAGAGGAGCCAAAGCGCAGGGTGGATACTTCAGTGTCTTGGGAGGCGTTGATTTGTGTCGGATCGTCCAAGAAGAGAGCGAGGAAGGCATCCTCTTCAGATGATGAAGGAGGGCCAAGAACACTGGGAGGGGATGGCCACAGAGCGGAGGAGGCTAGCAAAGATAAAGAAG	1	2 Base Changes	VKSATSSSTESTASGMQDEVRAVGEEQRSEEPKRRVDTSVSWEALICVGSSKKRARKASSSDDEGGPRTLGGDGHRAEEASKDKE	VKSATLSSTESTASGMQDEVRAVGEEQRSEEPKRRVDTSVSWEALICVGSSKKRARKASSSDDEGGPRTLGGDGHRAEEASKDKE
GTCAAGAGTGCCACCTCGTCCTCCACGGAGAGCACGGCGTCTGGAATGCAGGATGAGGTCAGAGCGGTTGGCGAGGAGCAAAGGTCAGAGGAGCCAAAGCGCAGGGTGGATACTTCAGTGTCTTGGGAGGCGTTGATTTGTGTCGGATCGTCCAAGAAGAGAGCGAGGAAGGCATCCTCTTCAGATGATGAAGGAGGGCCAAGAACACTGGGAGGGGATGGCCACAGAGCGGAGGAGGCTAGCAGAGACAAAGAAG	GTCAAGAGTGCCACCTCGTCCTCCACGGAGAGCACGGCGTCTGGAATGCAGGATGAGGTCAGAGCGGTTGGCGAGGAGCAAAGGTCAGAGGAGCCAAAGCGCAGGGTGGATACTTCAGTGTCTTGGGAGGCGTTGATTTGTGTCGGATCGTCCAAGAAGAGAGCGAGGAAGGCATCCTCTTCAGATGATGAAGGAGGGCCAAGAACACTGGGAGGGGATGGCCACAGAGCGGAGGAGGCTAGCAGAGACAAAGAAG	1	2 Base Changes	VKSATSSSTESTASGMQDEVRAVGEEQRSEEPKRRVDTSVSWEALICVGSSKKRARKASSSDDEGGPRTLGGDGHRAEEASRDKE	VKSATLSSTESTASGMQDEVRAVGEEQRSEEPKRRVDTSVSWEALICVGSSKKRARKASSSDDEGGPRTLGGDGHRAEEASKDKE
GTCAAGAGTGCCACCTCGTCCTCCACGGAGAGCACGGCGTCTGGAATGCAGGATGAGGTCAGAGCGGTTGGCGAGGAGCAAAGGTCAGAGGAGCCAAAGCGCAGGGTGGATACTTCAGTGTCTTGGGAGGCGTTGATTTGTGTCGGATCGTCCAAGAAGAGAGCGAGGAAGGCATCCTCTTCAGATGATGAAGGAGGGCCAAGAACACTGGGAGGGGATGGCCACGGAGCGGAGGAGGCTAGCAAAGACAAAGAAG	GTCAAGAGTGCCACCTCGTCCTCCACGGAGAGCACGGCGTCTGGAATGCAGGATGAGGTCAGAGCGGTTGGCGAGGAGCAAAGGTCAGAGGAGCCAAAGCGCAGGGTGGATACTTCAGTGTCTTGGGAGGCGTTGATTTGTGTCGGATCGTCCAAGAAGAGAGCGAGGAAGGCATCCTCTTCAGATGATGAAGGAGGGCCAAGAACACTGGGAGGGGATGGCCACGGAGCGGAGGAGGCTAGCAAAGACAAAGAAG	1	2 Base Changes	VKSATSSSTESTASGMQDEVRAVGEEQRSEEPKRRVDTSVSWEALICVGSSKKRARKASSSDDEGGPRTLGGDGHGAEEASKDKE	VKSATLSSTESTASGMQDEVRAVGEEQRSEEPKRRVDTSVSWEALICVGSSKKRARKASSSDDEGGPRTLGGDGHRAEEASKDKE
GTCAAGAGTGCCACCTCGTCCTCCACGGAGAGCACGGCGTCTGGAATGCAGGATGAGGTCAGAGCGGTTGGCGAGGAGCAAAGGTCAGAGGAGCCAAAGCGCAGGGTGGATACTTCAGTGTCTTGGGAGGCGTTGATTTGTGTCGGATCGTCCAAGAAGAGAGCGAGGAAGGCATCCTCTTCAGATGATGAAGGAGGGCCAAGAGCACTGGGAGGGGATGGCCACAGAGCGGAGGAGGCTAGCAAAGACAAAGAAG	GTCAAGAGTGCCACCTCGTCCTCCACGGAGAGCACGGCGTCTGGAATGCAGGATGAGGTCAGAGCGGTTGGCGAGGAGCAAAGGTCAGAGGAGCCAAAGCGCAGGGTGGATACTTCAGTGTCTTGGGAGGCGTTGATTTGTGTCGGATCGTCCAAGAAGAGAGCGAGGAAGGCATCCTCTTCAGATGATGAAGGAGGGCCAAGAGCACTGGGAGGGGATGGCCACAGAGCGGAGGAGGCTAGCAAAGACAAAGAAG	1	2 Base Changes	VKSATSSSTESTASGMQDEVRAVGEEQRSEEPKRRVDTSVSWEALICVGSSKKRARKASSSDDEGGPRALGGDGHRAEEASKDKE	VKSATLSSTESTASGMQDEVRAVGEEQRSEEPKRRVDTSVSWEALICVGSSKKRARKASSSDDEGGPRTLGGDGHRAEEASKDKE
GTCAAGAGTGCCACCTCGTCCTCCACGGAGAGCACGGCGTCTGGAATGCAGGATGAGGTCAGAGCGGTTGGCGAGGAGCAAAGGTCAGAGGAGCCAAAGCGCAGGGTGGATACTTCAGTGTCTTGGGAGGCGTTGATTTGTGTCGGATCGTCCAAGAAGAGAGCGAGGAAGGCATCCTCTTCAGATGATGGAGGAGGGCCAAGAACACTGGGAGGGGATGGCCACAGAGCGGAGGAGGCTAGCAAAGACAAAGAAG	GTCAAGAGTGCCACCTCGTCCTCCACGGAGAGCACGGCGTCTGGAATGCAGGATGAGGTCAGAGCGGTTGGCGAGGAGCAAAGGTCAGAGGAGCCAAAGCGCAGGGTGGATACTTCAGTGTCTTGGGAGGCGTTGATTTGTGTCGGATCGTCCAAGAAGAGAGCGAGGAAGGCATCCTCTTCAGATGATGGAGGAGGGCCAAGAACACTGGGAGGGGATGGCCACAGAGCGGAGGAGGCTAGCAAAGACAAAGAAG	1	2 Base Changes	VKSATSSSTESTASGMQDEVRAVGEEQRSEEPKRRVDTSVSWEALICVGSSKKRARKASSSDDGGGPRTLGGDGHRAEEASKDKE	VKSATLSSTESTASGMQDEVRAVGEEQRSEEPKRRVDTSVSWEALICVGSSKKRARKASSSDDEGGPRTLGGDGHRAEEASKDKE
GTCAAGAGTGCCACCTCGTCCTCCACGGAGAGCACGGCGTCTGGAATGCAGGATGAGGTCAGAGCGGTTGGCGAGGAGCAAAGGTCAGAGGAGCCAAAGCGCAGGGTGGATACTTCAGTGTCTTGGGAGGCGTTGATTTGTGTCGGATCGTCCAAGAAGAGAGCGAGGAAGGCATCCTCTTCAGGTGATGAAGGAGGGCCAAGAACACTGGGAGGGGATGGCCACAGAGCGGAGGAGGCTAGCAAAGACAAAGAAG	GTCAAGAGTGCCACCTCGTCCTCCACGGAGAGCACGGCGTCTGGAATGCAGGATGAGGTCAGAGCGGTTGGCGAGGAGCAAAGGTCAGAGGAGCCAAAGCGCAGGGTGGATACTTCAGTGTCTTGGGAGGCGTTGATTTGTGTCGGATCGTCCAAGAAGAGAGCGAGGAAGGCATCCTCTTCAGGTGATGAAGGAGGGCCAAGAACACTGGGAGGGGATGGCCACAGAGCGGAGGAGGCTAGCAAAGACAAAGAAG	1	2 Base Changes	VKSATSSSTESTASGMQDEVRAVGEEQRSEEPKRRVDTSVSWEALICVGSSKKRARKASSSGDEGGPRTLGGDGHRAEEASKDKE	VKSATLSSTESTASGMQDEVRAVGEEQRSEEPKRRVDTSVSWEALICVGSSKKRARKASSSDDEGGPRTLGGDGHRAEEASKDKE
GTCAAGAGTGCCACCTCGTCCTCCACGGAGAGCACGGCGTCTGGAATGCAGGATGAGGTCAGAGCGGTTGGCGAGGAGCAAAGGTCAGAGGAGCCAAAGCGCAGGGTGGATACTTCAGTGTCTTGGGAGGCGTTGATTTGTGTCGGATCGTCCAAGAAGAGAGCGAGGAAGGCATCTTCTTCAGATGATGAAGGAGGGCCAAGAACACTGGGAGGGGATGGCCACAGAGCGGAGGAGGCTAGCAAAGACAAAGAAG	GTCAAGAGTGCCACCTCGTCCTCCACGGAGAGCACGGCGTCTGGAATGCAGGATGAGGTCAGAGCGGTTGGCGAGGAGCAAAGGTCAGAGGAGCCAAAGCGCAGGGTGGATACTTCAGTGTCTTGGGAGGCGTTGATTTGTGTCGGATCGTCCAAGAAGAGAGCGAGGAAGGCATCTTCTTCAGATGATGAAGGAGGGCCAAGAACACTGGGAGGGGATGGCCACAGAGCGGAGGAGGCTAGCAAAGACAAAGAAG	1	2 Base Changes	VKSATSSSTESTASGMQDEVRAVGEEQRSEEPKRRVDTSVSWEALICVGSSKKRARKASSSDDEGGPRTLGGDGHRAEEASKDKE	VKSATLSSTESTASGMQDEVRAVGEEQRSEEPKRRVDTSVSWEALICVGSSKKRARKASSSDDEGGPRTLGGDGHRAEEASKDKE
GTCAAGAGTGCCACCTCGTCCTCCACGGAGAGCACGGCGTCTGGAATGCAGGATGAGGTCAGAGCGGTTGGCGAGGAGCAAAGGTCAGAGGAGCCAAAGCGCAGGGTGGATACTTCAGTGTCTTGGGAGGCGTTGATTTGTGTCGGATCGTCCAAGAAGAGAGCGAGGAAGGCGTCCTCTTCAGATGATGAAGGAGGGCCAAGAACACTGGGAGGGGATGGCCACAGAGCGGAGGAGGCTAGCAAAGACAAAGAAG	GTCAAGAGTGCCACCTCGTCCTCCACGGAGAGCACGGCGTCTGGAATGCAGGATGAGGTCAGAGCGGTTGGCGAGGAGCAAAGGTCAGAGGAGCCAAAGCGCAGGGTGGATACTTCAGTGTCTTGGGAGGCGTTGATTTGTGTCGGATCGTCCAAGAAGAGAGCGAGGAAGGCGTCCTCTTCAGATGATGAAGGAGGGCCAAGAACACTGGGAGGGGATGGCCACAGAGCGGAGGAGGCTAGCAAAGACAAAGAAG	1	2 Base Changes	VKSATSSSTESTASGMQDEVRAVGEEQRSEEPKRRVDTSVSWEALICVGSSKKRARKASSSDDEGGPRTLGGDGHRAEEASKDKE	VKSATLSSTESTASGMQDEVRAVGEEQRSEEPKRRVDTSVSWEALICVGSSKKRARKASSSDDEGGPRTLGGDGHRAEEASKDKE
GTCAAGAGTGCCACCTCGTCCTCCACGGAGAGCACGGCGTCTGGAATGCAGGATGAGGTCAGAGCGGTTGGCGAGGAGCAAAGGTCAGAGGAGCCAAAGCGCAGGGTGGATACTTCAGTGTCTTGGGAGGCGTTGATTTGTGTCGGATCGTCCAGGAAGAGAGCGAGGAAGGCATCCTCTTCAGATGATGAAGGAGGGCCAAGAACACTGGGAGGGGATGGCCACAGAGCGGAGGAGGCTAGCAAAGACAAAGAAG	GTCAAGAGTGCCACCTCGTCCTCCACGGAGAGCACGGCGTCTGGAATGCAGGATGAGGTCAGAGCGGTTGGCGAGGAGCAAAGGTCAGAGGAGCCAAAGCGCAGGGTGGATACTTCAGTGTCTTGGGAGGCGTTGATTTGTGTCGGATCGTCCAGGAAGAGAGCGAGGAAGGCATCCTCTTCAGATGATGAAGGAGGGCCAAGAACACTGGGAGGGGATGGCCACAGAGCGGAGGAGGCTAGCAAAGACAAAGAAG	1	2 Base Changes	VKSATSSSTESTASGMQDEVRAVGEEQRSEEPKRRVDTSVSWEALICVGSSRKRARKASSSDDEGGPRTLGGDGHRAEEASKDKE	VKSATLSSTESTASGMQDEVRAVGEEQRSEEPKRRVDTSVSWEALICVGSSKKRARKASSSDDEGGPRTLGGDGHRAEEASKDKE
GTCAAGAGTGCCACCTCGTCCTCCACGGAGAGCACGGCGTCTGGAATGCAGGATGAGGTCAGAGCGGTTGGCGAGGAGCAAAGGTCAGAGGAGCCAAAGCGCAGGGTGGATACTTCAGTGTCTTGGGAGGCGTTGATTTGTGTCGGATCGTCCGAGAAGAGAGCGAGGAAGGCATCCTCTTCAGATGATGAAGGAGGGCCAAGAACACTGGGAGGGGATGGCCACAGAGCGGAGGAGGCTAGCAAAGACAAAGAAG	GTCAAGAGTGCCACCTCGTCCTCCACGGAGAGCACGGCGTCTGGAATGCAGGATGAGGTCAGAGCGGTTGGCGAGGAGCAAAGGTCAGAGGAGCCAAAGCGCAGGGTGGATACTTCAGTGTCTTGGGAGGCGTTGATTTGTGTCGGATCGTCCGAGAAGAGAGCGAGGAAGGCATCCTCTTCAGATGATGAAGGAGGGCCAAGAACACTGGGAGGGGATGGCCACAGAGCGGAGGAGGCTAGCAAAGACAAAGAAG	1	2 Base Changes	VKSATSSSTESTASGMQDEVRAVGEEQRSEEPKRRVDTSVSWEALICVGSSEKRARKASSSDDEGGPRTLGGDGHRAEEASKDKE	VKSATLSSTESTASGMQDEVRAVGEEQRSEEPKRRVDTSVSWEALICVGSSKKRARKASSSDDEGGPRTLGGDGHRAEEASKDKE
GTCAAGAGTGCCACCTCGTCCTCCACGGAGAGCACGGCGTCTGGAATGCAGGATGAGGTCAGAGCGGTTGGCGAGGAGCAAAGGTCAGAGGAGCCAAAGCGCAGGGTGGATACTTCAGTGTCTTGGGAGGCGTTGATTTGTGTCGTATCGTCCAAGAAGAGAGCGAGGAAGGCATCCTCTTCAGATGATGAAGGAGGGCCAAGAACACTGGGAGGGGATGGCCACAGAGCGGAGGAGGCTAGCAAAGACAAAGAAG	GTCAAGAGTGCCACCTCGTCCTCCACGGAGAGCACGGCGTCTGGAATGCAGGATGAGGTCAGAGCGGTTGGCGAGGAGCAAAGGTCAGAGGAGCCAAAGCGCAGGGTGGATACTTCAGTGTCTTGGGAGGCGTTGATTTGTGTCGTATCGTCCAAGAAGAGAGCGAGGAAGGCATCCTCTTCAGATGATGAAGGAGGGCCAAGAACACTGGGAGGGGATGGCCACAGAGCGGAGGAGGCTAGCAAAGACAAAGAAG	1	2 Base Changes	VKSATSSSTESTASGMQDEVRAVGEEQRSEEPKRRVDTSVSWEALICVVSSKKRARKASSSDDEGGPRTLGGDGHRAEEASKDKE	VKSATLSSTESTASGMQDEVRAVGEEQRSEEPKRRVDTSVSWEALICVGSSKKRARKASSSDDEGGPRTLGGDGHRAEEASKDKE
GTCAAGAGTGCCACCTCGTCCTCCACGGAGAGCACGGCGTCTGGAATGCAGGATGAGGTCAGAGCGGTTGGCGAGGAGCAAAGGTCAGAGGAGCCAAAGCGCGGGGTGGATACTTCAGTGTCTTGGGAGGCGTTGATTTGTGTCGGATCGTCCAAGAAGAGAGCGAGGAAGGCATCCTCTTCAGATGATGAAGGAGGGCCAAGAACACTGGGAGGGGATGGCCACAGAGCGGAGGAAGCTAGCAAAGACAAAGAAG	GTCAAGAGTGCCACCTCGTCCTCCACGGAGAGCACGGCGTCTGGAATGCAGGATGAGGTCAGAGCGGTTGGCGAGGAGCAAAGGTCAGAGGAGCCAAAGCGCGGGGTGGATACTTCAGTGTCTTGGGAGGCGTTGATTTGTGTCGGATCGTCCAAGAAGAGAGCGAGGAAGGCATCCTCTTCAGATGATGAAGGAGGGCCAAGAACACTGGGAGGGGATGGCCACAGAGCGGAGGAAGCTAGCAAAGACAAAGAAG	1	3 Base Changes	VKSATSSSTESTASGMQDEVRAVGEEQRSEEPKRGVDTSVSWEALICVGSSKKRARKASSSDDEGGPRTLGGDGHRAEEASKDKE	VKSATLSSTESTASGMQDEVRAVGEEQRSEEPKRRVDTSVSWEALICVGSSKKRARKASSSDDEGGPRTLGGDGHRAEEASKDKE
GTCAAGAGTGCCACCTCGTCCTCCACGGAGAGCACGGCGTCTGGAATGCAGGATGAGGTCAGAGCGGTTGGCGAGGAGCAAAGGTCAGAGGAGCCAAAGTGCAGGGTGGATACTTCAGTGTCTTGGGAGGCGTTGATTTGTGTCGGATCGTCCAAGAAGAGAGCGAGGACGGCATCCTCTTCAGATGATGAAGGAGGGCCAAGAACACTGGGAGGGGATGGCCACAGAGCGGAGGAGGCTAGCAAAGACAAAGAAG	GTCAAGAGTGCCACCTCGTCCTCCACGGAGAGCACGGCGTCTGGAATGCAGGATGAGGTCAGAGCGGTTGGCGAGGAGCAAAGGTCAGAGGAGCCAAAGTGCAGGGTGGATACTTCAGTGTCTTGGGAGGCGTTGATTTGTGTCGGATCGTCCAAGAAGAGAGCGAGGACGGCATCCTCTTCAGATGATGAAGGAGGGCCAAGAACACTGGGAGGGGATGGCCACAGAGCGGAGGAGGCTAGCAAAGACAAAGAAG	1	3 Base Changes	VKSATSSSTESTASGMQDEVRAVGEEQRSEEPKCRVDTSVSWEALICVGSSKKRARTASSSDDEGGPRTLGGDGHRAEEASKDKE	VKSATLSSTESTASGMQDEVRAVGEEQRSEEPKRRVDTSVSWEALICVGSSKKRARKASSSDDEGGPRTLGGDGHRAEEASKDKE
GTCAAGAGTGCCACCTCGTCCTCCACGGAGAGCACGGCGTCTGGAATGCAGGATGAGGTCAGAGCGGTTGGCGAGGAGCAAAGGTCAGAGGAGCCAAGGCGCAGGGTGGATACTTCAGTGTCTTGGGAGGCGTTGATTTGTGTCGGATCGTCCAAGAAGAGAGCGAGGAAGGCATCCTCTTCAGATGATGAAGGAGGGCCAAGAACACTGGGAGGGGATGGCCACAGAGCGGAGGAGGCTAGCAAAGACAAAGAAG	GTCAAGAGTGCCACCTCGTCCTCCACGGAGAGCACGGCGTCTGGAATGCAGGATGAGGTCAGAGCGGTTGGCGAGGAGCAAAGGTCAGAGGAGCCAAGGCGCAGGGTGGATACTTCAGTGTCTTGGGAGGCGTTGATTTGTGTCGGATCGTCCAAGAAGAGAGCGAGGAAGGCATCCTCTTCAGATGATGAAGGAGGGCCAAGAACACTGGGAGGGGATGGCCACAGAGCGGAGGAGGCTAGCAAAGACAAAGAAG	1	2 Base Changes	VKSATSSSTESTASGMQDEVRAVGEEQRSEEPRRRVDTSVSWEALICVGSSKKRARKASSSDDEGGPRTLGGDGHRAEEASKDKE	VKSATLSSTESTASGMQDEVRAVGEEQRSEEPKRRVDTSVSWEALICVGSSKKRARKASSSDDEGGPRTLGGDGHRAEEASKDKE
GTCAAGAGTGCCACCTCGTCCTCCACGGAGAGCACGGCGTCTGGAATGCAGGATGAGGTCAGAGCGGTTGGCGAGGAGCAAAGGTCAGGGGAGCCAAAGCGCAGGGTGGATACTTCAGTGTCTTGGGAGGCGTTGATTTGTGTCGGATCGTCCAAGAAGAGAGCGAGGAAGGCATCCTCTTCAGATGATGAAGGAGGGCCAAGAACACTGGGAGGGGATGGCCACAGAGCGGAGGAGGCTAGCAAAGACAAAGAAG	GTCAAGAGTGCCACCTCGTCCTCCACGGAGAGCACGGCGTCTGGAATGCAGGATGAGGTCAGAGCGGTTGGCGAGGAGCAAAGGTCAGGGGAGCCAAAGCGCAGGGTGGATACTTCAGTGTCTTGGGAGGCGTTGATTTGTGTCGGATCGTCCAAGAAGAGAGCGAGGAAGGCATCCTCTTCAGATGATGAAGGAGGGCCAAGAACACTGGGAGGGGATGGCCACAGAGCGGAGGAGGCTAGCAAAGACAAAGAAG	1	2 Base Changes	VKSATSSSTESTASGMQDEVRAVGEEQRSGEPKRRVDTSVSWEALICVGSSKKRARKASSSDDEGGPRTLGGDGHRAEEASKDKE	VKSATLSSTESTASGMQDEVRAVGEEQRSEEPKRRVDTSVSWEALICVGSSKKRARKASSSDDEGGPRTLGGDGHRAEEASKDKE
GTCAAGAGTGCCACCTCGTCCTCCACGGAGAGCACGGCGTCTGGAATGCAGGATGAGGTCAGAGCGGTTGGCGAGGGGCAAAGGTCAGAGGAGCCAAAGCGCAGGGTGGATACTTCAGTGTCTTGGGAGGCGTTGATTTGTGTCGGATCGTCCAAGAAGAGAGCGAGGAAGGCATCCTCTTCAGATGATGAAGGAGGGCCAAGAACACTGGGAGGGGATGGCCACAGAGCGGAGGAGGCTAGCAAAGACAAAGAAG	GTCAAGAGTGCCACCTCGTCCTCCACGGAGAGCACGGCGTCTGGAATGCAGGATGAGGTCAGAGCGGTTGGCGAGGGGCAAAGGTCAGAGGAGCCAAAGCGCAGGGTGGATACTTCAGTGTCTTGGGAGGCGTTGATTTGTGTCGGATCGTCCAAGAAGAGAGCGAGGAAGGCATCCTCTTCAGATGATGAAGGAGGGCCAAGAACACTGGGAGGGGATGGCCACAGAGCGGAGGAGGCTAGCAAAGACAAAGAAG	1	2 Base Changes	VKSATSSSTESTASGMQDEVRAVGEGQRSEEPKRRVDTSVSWEALICVGSSKKRARKASSSDDEGGPRTLGGDGHRAEEASKDKE	VKSATLSSTESTASGMQDEVRAVGEEQRSEEPKRRVDTSVSWEALICVGSSKKRARKASSSDDEGGPRTLGGDGHRAEEASKDKE
GTCAAGAGTGCCACCTCGTCCTCCACGGAGAGCACGGCGTCTGGAATGCAGGATGAGGTCAGAGCGGTTGGCGGGGAGCAAAGGTCAGAGGAGCCAAAGCGCAGGGTGGATACTTCAGTGTCTTGGGAGGCGTTGATTTGTGTCGGATCGTCCAAGAAGAGAGCGAGGAAGGCATCCTCTTCAGATGATGAAGGAGGGCCAAGAACACTGGGAGGGGATGGCCACAGAGCGGAGGAGGCTAGCAAAGACAAAGAAG	GTCAAGAGTGCCACCTCGTCCTCCACGGAGAGCACGGCGTCTGGAATGCAGGATGAGGTCAGAGCGGTTGGCGGGGAGCAAAGGTCAGAGGAGCCAAAGCGCAGGGTGGATACTTCAGTGTCTTGGGAGGCGTTGATTTGTGTCGGATCGTCCAAGAAGAGAGCGAGGAAGGCATCCTCTTCAGATGATGAAGGAGGGCCAAGAACACTGGGAGGGGATGGCCACAGAGCGGAGGAGGCTAGCAAAGACAAAGAAG	1	2 Base Changes	VKSATSSSTESTASGMQDEVRAVGGEQRSEEPKRRVDTSVSWEALICVGSSKKRARKASSSDDEGGPRTLGGDGHRAEEASKDKE	VKSATLSSTESTASGMQDEVRAVGEEQRSEEPKRRVDTSVSWEALICVGSSKKRARKASSSDDEGGPRTLGGDGHRAEEASKDKE
GTCAAGAGTGCCACCTCGTCCTCCACGGAGAGCACGGCGTCTGGAATGCAGGATGAGGTCAGGGCGGTTGGCGAGGAGCAAAGGTCAGAGGAGCCAAAGCGCAGGGTGGATACTTCAGTGTCTTGGGAGGCGTTGATTTGTGTCGGATCGTCCAAGGAGAGAGCGAGGAAGGCATCCTCTTCAGATGATGAAGGAGGGCCAAGAACACTGGGAGGGGATGGCCACAGAGCGGAGGAGGCTAGCAAAGACAAAGAAG	GTCAAGAGTGCCACCTCGTCCTCCACGGAGAGCACGGCGTCTGGAATGCAGGATGAGGTCAGGGCGGTTGGCGAGGAGCAAAGGTCAGAGGAGCCAAAGCGCAGGGTGGATACTTCAGTGTCTTGGGAGGCGTTGATTTGTGTCGGATCGTCCAAGGAGAGAGCGAGGAAGGCATCCTCTTCAGATGATGAAGGAGGGCCAAGAACACTGGGAGGGGATGGCCACAGAGCGGAGGAGGCTAGCAAAGACAAAGAAG	1	3 Base Changes	VKSATSSSTESTASGMQDEVRAVGEEQRSEEPKRRVDTSVSWEALICVGSSKERARKASSSDDEGGPRTLGGDGHRAEEASKDKE	VKSATLSSTESTASGMQDEVRAVGEEQRSEEPKRRVDTSVSWEALICVGSSKKRARKASSSDDEGGPRTLGGDGHRAEEASKDKE
GTCAAGAGTGCCACCTCGTCCTCCACGGAGAGCACGGCGTCTGGAATGCAGGATGGGGCCAGAGCGGTTGGCGAGGAGCAAAGGTCAGAGGAGCCAAAGCGCAGGGTGGATACTTCAGTGTCTTGGGAGGCGTTGATTTGTGTCGGATCGTCCAAGAAGAGAGCGAGGAAGGCATCCTCTTCAGATGATGAAGGAGGGCCAAGAACACTGGGAGGGGATGGCCACAGAGCGGAGGAGGCTAGCAAAGACAAAGAAG	GTCAAGAGTGCCACCTCGTCCTCCACGGAGAGCACGGCGTCTGGAATGCAGGATGGGGCCAGAGCGGTTGGCGAGGAGCAAAGGTCAGAGGAGCCAAAGCGCAGGGTGGATACTTCAGTGTCTTGGGAGGCGTTGATTTGTGTCGGATCGTCCAAGAAGAGAGCGAGGAAGGCATCCTCTTCAGATGATGAAGGAGGGCCAAGAACACTGGGAGGGGATGGCCACAGAGCGGAGGAGGCTAGCAAAGACAAAGAAG	1	3 Base Changes	VKSATSSSTESTASGMQDGARAVGEEQRSEEPKRRVDTSVSWEALICVGSSKKRARKASSSDDEGGPRTLGGDGHRAEEASKDKE	VKSATLSSTESTASGMQDEVRAVGEEQRSEEPKRRVDTSVSWEALICVGSSKKRARKASSSDDEGGPRTLGGDGHRAEEASKDKE
GTCAAGAGTGCCACCTCGTCCTCCACGGAGAGCACGGCGTCTGGAGTGCAGGATGAGGTCAGAGCGGTTGGCGAGGAGCAAAGGTCAGAGGAGCCAAAGCGCAGGGTGGATACTTCAGTGTCTTGGGAGGCGTTGATTTGTGTCGGATCGTCCAAGAAGAGAGCGAGGAAGGCATCCTCTTCAGATGATGAAGGAGGGCCAAGAACACTGGGAGGGGATGGCCACAGAGCGGAGGAGGCTAGCAAAGACAAAGAAG	GTCAAGAGTGCCACCTCGTCCTCCACGGAGAGCACGGCGTCTGGAGTGCAGGATGAGGTCAGAGCGGTTGGCGAGGAGCAAAGGTCAGAGGAGCCAAAGCGCAGGGTGGATACTTCAGTGTCTTGGGAGGCGTTGATTTGTGTCGGATCGTCCAAGAAGAGAGCGAGGAAGGCATCCTCTTCAGATGATGAAGGAGGGCCAAGAACACTGGGAGGGGATGGCCACAGAGCGGAGGAGGCTAGCAAAGACAAAGAAG	1	2 Base Changes	VKSATSSSTESTASGVQDEVRAVGEEQRSEEPKRRVDTSVSWEALICVGSSKKRARKASSSDDEGGPRTLGGDGHRAEEASKDKE	VKSATLSSTESTASGMQDEVRAVGEEQRSEEPKRRVDTSVSWEALICVGSSKKRARKASSSDDEGGPRTLGGDGHRAEEASKDKE
GTCAAGAGTGCCACCTCGTCCTCCACGGAGAGCATGGCGTCTGGAATGCAGGATGAGGTCAGAGCGGTTGGCGAGGAGCAAAGGTCAGAGGAGCCAAAGCGCAGGGTGGATACTTCAGTGTCTTGGGAGGCGTTGATTTGTGTCGGATCGTCCAAGAAGAGAGCGAGGAAGGCATCCTCTTCAGATGATGAAGGAGGGCCAAGAACACTGGGAGGGGATGGCCACAGAGCGGAGGAGGCTAGCAAAGACAAAGAAG	GTCAAGAGTGCCACCTCGTCCTCCACGGAGAGCATGGCGTCTGGAATGCAGGATGAGGTCAGAGCGGTTGGCGAGGAGCAAAGGTCAGAGGAGCCAAAGCGCAGGGTGGATACTTCAGTGTCTTGGGAGGCGTTGATTTGTGTCGGATCGTCCAAGAAGAGAGCGAGGAAGGCATCCTCTTCAGATGATGAAGGAGGGCCAAGAACACTGGGAGGGGATGGCCACAGAGCGGAGGAGGCTAGCAAAGACAAAGAAG	1	2 Base Changes	VKSATSSSTESMASGMQDEVRAVGEEQRSEEPKRRVDTSVSWEALICVGSSKKRARKASSSDDEGGPRTLGGDGHRAEEASKDKE	VKSATLSSTESTASGMQDEVRAVGEEQRSEEPKRRVDTSVSWEALICVGSSKKRARKASSSDDEGGPRTLGGDGHRAEEASKDKE
GTCAAGAGTGCCACCTCGTCCTCCACGGAGGGCACGGCGTCTGGAATGCAGGATGAGGTCAGAGCGGTTGGCGAGGAGCAAAGGTCAGAGGAGCCAAAGCGCAGGGTGGATACTTCAGTGTCTTGGGAGGCGTTGATTTGTGTCGGATCGTCCAAGAAGAGAGCGAGGAAGGCATCCTCTTCAGATGATGAAGGAGGGCCAAGAACACTGGGAGGGGATGGCCACAGAGCGGAGGAGGCTAGCAAAGACAAAGAAG	GTCAAGAGTGCCACCTCGTCCTCCACGGAGGGCACGGCGTCTGGAATGCAGGATGAGGTCAGAGCGGTTGGCGAGGAGCAAAGGTCAGAGGAGCCAAAGCGCAGGGTGGATACTTCAGTGTCTTGGGAGGCGTTGATTTGTGTCGGATCGTCCAAGAAGAGAGCGAGGAAGGCATCCTCTTCAGATGATGAAGGAGGGCCAAGAACACTGGGAGGGGATGGCCACAGAGCGGAGGAGGCTAGCAAAGACAAAGAAG	1	2 Base Changes	VKSATSSSTEGTASGMQDEVRAVGEEQRSEEPKRRVDTSVSWEALICVGSSKKRARKASSSDDEGGPRTLGGDGHRAEEASKDKE	VKSATLSSTESTASGMQDEVRAVGEEQRSEEPKRRVDTSVSWEALICVGSSKKRARKASSSDDEGGPRTLGGDGHRAEEASKDKE
GTCAAGAGTGCCACCTGGTCCTCCACGGAGAGCACAGCGTCTGGAATGCAGGATGAGGTCAGAGCGGTTGGCGAGGAGCAAAGGTCAGAGGAGCCAAAGCGCAGGGTGGATACTTCAGTGTCTTGGGAGGCGTTGATTTGTGTCGGATCGTCCAAGAAGAGAGCGAGGAAGGCATCCTCTTCAGATGATGACGGAGGGCCAAGAACACTGGGAGGGGATGGCCACAGAGCGGAGGAGGCTAGCAAAGACAAAGAAG	GTCAAGAGTGCCACCTGGTCCTCCACGGAGAGCACAGCGTCTGGAATGCAGGATGAGGTCAGAGCGGTTGGCGAGGAGCAAAGGTCAGAGGAGCCAAAGCGCAGGGTGGATACTTCAGTGTCTTGGGAGGCGTTGATTTGTGTCGGATCGTCCAAGAAGAGAGCGAGGAAGGCATCCTCTTCAGATGATGACGGAGGGCCAAGAACACTGGGAGGGGATGGCCACAGAGCGGAGGAGGCTAGCAAAGACAAAGAAG	1	3 Base Changes	VKSATWSSTESTASGMQDEVRAVGEEQRSEEPKRRVDTSVSWEALICVGSSKKRARKASSSDDDGGPRTLGGDGHRAEEASKDKE	VKSATLSSTESTASGMQDEVRAVGEEQRSEEPKRRVDTSVSWEALICVGSSKKRARKASSSDDEGGPRTLGGDGHRAEEASKDKE
GTCAAGAGTGCCACCTGGTCCTCCACGGAGAGCACGGCGTCTGGAATGCAGGATGAGGTCAGAGCGGTTGGCGAGGAGCAAAGGTCAGAGGAGCCAAAGCGCAGGGTGGATACTTCAGTGTCTTGGGAGGCGTTGATTTGTGTCGGAACGTCCAAGAAGAGAGCGAGGAAGGCATCCTCTTCAGATGATGAAGGAGGGCCAAGAACACGGGGAGGGGATGGCCACAGAGCGGAGGAGGCTAGCAAAGACAAAGAAG	GTCAAGAGTGCCACCTGGTCCTCCACGGAGAGCACGGCGTCTGGAATGCAGGATGAGGTCAGAGCGGTTGGCGAGGAGCAAAGGTCAGAGGAGCCAAAGCGCAGGGTGGATACTTCAGTGTCTTGGGAGGCGTTGATTTGTGTCGGAACGTCCAAGAAGAGAGCGAGGAAGGCATCCTCTTCAGATGATGAAGGAGGGCCAAGAACACGGGGAGGGGATGGCCACAGAGCGGAGGAGGCTAGCAAAGACAAAGAAG	1	3 Base Changes	VKSATWSSTESTASGMQDEVRAVGEEQRSEEPKRRVDTSVSWEALICVGTSKKRARKASSSDDEGGPRTRGGDGHRAEEASKDKE	VKSATLSSTESTASGMQDEVRAVGEEQRSEEPKRRVDTSVSWEALICVGSSKKRARKASSSDDEGGPRTLGGDGHRAEEASKDKE
GTCAAGAGTGCCACCTGGTCCTCCACGGAGAGCACGGCGTCTGGAATGCAGGATGAGGTCAGAGCGGTTGGCGAGGAGCAAAGGTCAGAGGAGCCAAAGCGCAGGGTGGATACTTCAGTGTCTTGGGAGGCGTTGATTTGTGTCGGATCGTCCAAAAAGAGAGCGAGGAAGGCATCCTCTTCAGATGATGAAGGAGGGCCAAGAACACTGGGAGGGGATGGCCACAGAGCGGAGGAGGCTAGCAAAGACAAAGAAG	GTCAAGAGTGCCACCTGGTCCTCCACGGAGAGCACGGCGTCTGGAATGCAGGATGAGGTCAGAGCGGTTGGCGAGGAGCAAAGGTCAGAGGAGCCAAAGCGCAGGGTGGATACTTCAGTGTCTTGGGAGGCGTTGATTTGTGTCGGATCGTCCAAAAAGAGAGCGAGGAAGGCATCCTCTTCAGATGATGAAGGAGGGCCAAGAACACTGGGAGGGGATGGCCACAGAGCGGAGGAGGCTAGCAAAGACAAAGAAG	1	2 Base Changes	VKSATWSSTESTASGMQDEVRAVGEEQRSEEPKRRVDTSVSWEALICVGSSKKRARKASSSDDEGGPRTLGGDGHRAEEASKDKE	VKSATLSSTESTASGMQDEVRAVGEEQRSEEPKRRVDTSVSWEALICVGSSKKRARKASSSDDEGGPRTLGGDGHRAEEASKDKE
GTCAAGAGTGCCACCTGGTCCTCCACGGAGAGCACGGCGTCTGGAATGCAGGATGAGGTCAGAGCGGTTGGCGAGGAGCAAAGGTCAGAGGAGCCAAAGCGCAGGGTGGATACTTCAGTGTCTTGGGAGGCGTTGATTTGTGTCGGATCGTCCAAGAAGAGAGCGAGGAAGGCATCCTCTTCAGATGATGAGGGAGGGCCAAGAACACTGGGAGGGGATGGCCACAGAGCGGAGGAGGCTAGCAAAGACAAAGAAG	GTCAAGAGTGCCACCTGGTCCTCCACGGAGAGCACGGCGTCTGGAATGCAGGATGAGGTCAGAGCGGTTGGCGAGGAGCAAAGGTCAGAGGAGCCAAAGCGCAGGGTGGATACTTCAGTGTCTTGGGAGGCGTTGATTTGTGTCGGATCGTCCAAGAAGAGAGCGAGGAAGGCATCCTCTTCAGATGATGAGGGAGGGCCAAGAACACTGGGAGGGGATGGCCACAGAGCGGAGGAGGCTAGCAAAGACAAAGAAG	1	2 Base Changes	VKSATWSSTESTASGMQDEVRAVGEEQRSEEPKRRVDTSVSWEALICVGSSKKRARKASSSDDEGGPRTLGGDGHRAEEASKDKE	VKSATLSSTESTASGMQDEVRAVGEEQRSEEPKRRVDTSVSWEALICVGSSKKRARKASSSDDEGGPRTLGGDGHRAEEASKDKE
GTCAAGAGTGCCACCTGGTCCTCCACGGAGAGCACGGCGTCTGGAATGCAGGATGAGGTCAGAGCGGTTGGCGAGGAGCAAAGGTCGGAGGAGCCAAAGCGCAGGGTGGATACTTCAGTGTCTTGGGAGGCGTTGATTTGTGTCGGATCGTCCAAGAAGAGAGCGAGGAAGGCATCCTCTTCAGATGATGAAGGAGGGCCAAGAACACTGGGAGGGGATGGCCACAGAGCGGAGGAGGCTAGCAAAGACAAAGAAG	GTCAAGAGTGCCACCTGGTCCTCCACGGAGAGCACGGCGTCTGGAATGCAGGATGAGGTCAGAGCGGTTGGCGAGGAGCAAAGGTCGGAGGAGCCAAAGCGCAGGGTGGATACTTCAGTGTCTTGGGAGGCGTTGATTTGTGTCGGATCGTCCAAGAAGAGAGCGAGGAAGGCATCCTCTTCAGATGATGAAGGAGGGCCAAGAACACTGGGAGGGGATGGCCACAGAGCGGAGGAGGCTAGCAAAGACAAAGAAG	1	2 Base Changes	VKSATWSSTESTASGMQDEVRAVGEEQRSEEPKRRVDTSVSWEALICVGSSKKRARKASSSDDEGGPRTLGGDGHRAEEASKDKE	VKSATLSSTESTASGMQDEVRAVGEEQRSEEPKRRVDTSVSWEALICVGSSKKRARKASSSDDEGGPRTLGGDGHRAEEASKDKE
GTCAAGAGTGCCACCTGGTCCTCCATGGAGAGCACGGCGTCTGGAATGCAGGATGAGGTCAGAGCGGTTGGCGAGGAGCAAAGGTCAGAGGAGCCAAAGCGCAGGGTGGATACTTCAGTGTCTTGGGAGGCGTTGATTTGTGTCGGATCGTCCAAGAAGAGAGCGAGGAAGGCATCCTCTTCAGATGATGAAGGAGGGCCAAGAACACTGGGAGGGGATGGCCACAGAGCGGAGGAGGCTAGCAAAGACAAAGAAG	GTCAAGAGTGCCACCTGGTCCTCCATGGAGAGCACGGCGTCTGGAATGCAGGATGAGGTCAGAGCGGTTGGCGAGGAGCAAAGGTCAGAGGAGCCAAAGCGCAGGGTGGATACTTCAGTGTCTTGGGAGGCGTTGATTTGTGTCGGATCGTCCAAGAAGAGAGCGAGGAAGGCATCCTCTTCAGATGATGAAGGAGGGCCAAGAACACTGGGAGGGGATGGCCACAGAGCGGAGGAGGCTAGCAAAGACAAAGAAG	1	2 Base Changes	VKSATWSSMESTASGMQDEVRAVGEEQRSEEPKRRVDTSVSWEALICVGSSKKRARKASSSDDEGGPRTLGGDGHRAEEASKDKE	VKSATLSSTESTASGMQDEVRAVGEEQRSEEPKRRVDTSVSWEALICVGSSKKRARKASSSDDEGGPRTLGGDGHRAEEASKDKE
GTCAAGAGTGCCACCTGGTCCTCCATGGAGAGCACGGCGTCTGGAATGCAGGATGAGGTCAGAGCGGTTGGCGAGGAGCAAAGGTCAGAGGAGCCAAAGCGCAGGGTGGATACTTCAGTGTCTTGGGAGGCGTTGATTTGTGTCGGATCGTCCAAGAAGAGAGCGAGGAAGGCATCCTCTTCAGATGATGGAGGAGGGCCAAGAACACTGGGAGGGGATGGCCACAGAGCGGAGGAGGCTAGCAAAGACAAAGAAG	GTCAAGAGTGCCACCTGGTCCTCCATGGAGAGCACGGCGTCTGGAATGCAGGATGAGGTCAGAGCGGTTGGCGAGGAGCAAAGGTCAGAGGAGCCAAAGCGCAGGGTGGATACTTCAGTGTCTTGGGAGGCGTTGATTTGTGTCGGATCGTCCAAGAAGAGAGCGAGGAAGGCATCCTCTTCAGATGATGGAGGAGGGCCAAGAACACTGGGAGGGGATGGCCACAGAGCGGAGGAGGCTAGCAAAGACAAAGAAG	1	3 Base Changes	VKSATWSSMESTASGMQDEVRAVGEEQRSEEPKRRVDTSVSWEALICVGSSKKRARKASSSDDGGGPRTLGGDGHRAEEASKDKE	VKSATLSSTESTASGMQDEVRAVGEEQRSEEPKRRVDTSVSWEALICVGSSKKRARKASSSDDEGGPRTLGGDGHRAEEASKDKE
GTCAAGAGTGCCACCTTATCCTCCACGGAGAGCACGGCGTCTGGAATGCAGGAGGAGGTCAGAGCGGTTGGCGAGGAGCAAAGGTCAGAGGAGCCAAAGCGCAGGGTGGATACTTCAGTGTCTTGGGAGGCGTTGATTTGTGTCGGATCGTCCAAGAAGAGAGCGAGGAAGGCATCCTCTTCAGATGATGAAGGAGGGCCAAGAACACTGGGAGGGGATGGCCACAGAGCGGAGGAGGCTAGCAAAGACAAAGAAG	GTCAAGAGTGCCACCTTATCCTCCACGGAGAGCACGGCGTCTGGAATGCAGGAGGAGGTCAGAGCGGTTGGCGAGGAGCAAAGGTCAGAGGAGCCAAAGCGCAGGGTGGATACTTCAGTGTCTTGGGAGGCGTTGATTTGTGTCGGATCGTCCAAGAAGAGAGCGAGGAAGGCATCCTCTTCAGATGATGAAGGAGGGCCAAGAACACTGGGAGGGGATGGCCACAGAGCGGAGGAGGCTAGCAAAGACAAAGAAG	1	2 Base Changes	VKSATLSSTESTASGMQEEVRAVGEEQRSEEPKRRVDTSVSWEALICVGSSKKRARKASSSDDEGGPRTLGGDGHRAEEASKDKE	VKSATLSSTESTASGMQDEVRAVGEEQRSEEPKRRVDTSVSWEALICVGSSKKRARKASSSDDEGGPRTLGGDGHRAEEASKDKE
GTCAAGAGTGCCACCTTATCCTCCACGGAGAGCACGGCGTCTGGAATGCAGGATGAGGCCAGAGCGGTTGGCGAGGAGCAAAGGTCAGAGGAGCCAAAGCGCAGGGTGGATACTTCAGTGTCTTGGGAGGCGTTGATTTGTGTCGGATCGTCCAAGAAGAGAGCGAGGAAGGCATCCTCTTCAGATGATGAAGGAGGGCCAAGAACACTGGGAGGGGATGGCCACAGAGCGGAGGAGGCTAGCAAAGACAAAGAAG	GTCAAGAGTGCCACCTTATCCTCCACGGAGAGCACGGCGTCTGGAATGCAGGATGAGGCCAGAGCGGTTGGCGAGGAGCAAAGGTCAGAGGAGCCAAAGCGCAGGGTGGATACTTCAGTGTCTTGGGAGGCGTTGATTTGTGTCGGATCGTCCAAGAAGAGAGCGAGGAAGGCATCCTCTTCAGATGATGAAGGAGGGCCAAGAACACTGGGAGGGGATGGCCACAGAGCGGAGGAGGCTAGCAAAGACAAAGAAG	1	2 Base Changes	VKSATLSSTESTASGMQDEARAVGEEQRSEEPKRRVDTSVSWEALICVGSSKKRARKASSSDDEGGPRTLGGDGHRAEEASKDKE	VKSATLSSTESTASGMQDEVRAVGEEQRSEEPKRRVDTSVSWEALICVGSSKKRARKASSSDDEGGPRTLGGDGHRAEEASKDKE
GTCAAGAGTGCCACCTTATCCTCCACGGAGAGCACGGCGTCTGGAATGCAGGATGAGGTCAGAGCGGTTGGCGAGGAGCAAAGGTCAGAGGAGCCAAAGCGCAGGGTGGATACTTCAGTGTCCTGGGAGGCGTTGATTTGTGTCGGATCGTCCAAGAAGAGAGCGAGGAAGGCATCCTCTTCAGATGATGAAGGAGGGCCAAGAACACTGGGAGGGGATGGCCACAGAGCGGAGGAGGCTAGCAAAGACAAAGAAG	GTCAAGAGTGCCACCTTATCCTCCACGGAGAGCACGGCGTCTGGAATGCAGGATGAGGTCAGAGCGGTTGGCGAGGAGCAAAGGTCAGAGGAGCCAAAGCGCAGGGTGGATACTTCAGTGTCCTGGGAGGCGTTGATTTGTGTCGGATCGTCCAAGAAGAGAGCGAGGAAGGCATCCTCTTCAGATGATGAAGGAGGGCCAAGAACACTGGGAGGGGATGGCCACAGAGCGGAGGAGGCTAGCAAAGACAAAGAAG	1	2 Base Changes	VKSATLSSTESTASGMQDEVRAVGEEQRSEEPKRRVDTSVSWEALICVGSSKKRARKASSSDDEGGPRTLGGDGHRAEEASKDKE	VKSATLSSTESTASGMQDEVRAVGEEQRSEEPKRRVDTSVSWEALICVGSSKKRARKASSSDDEGGPRTLGGDGHRAEEASKDKE
[truncated: 5,342 more rows]

## Sheet: A2-Oil+CR GFAP
Reference sequence	Target sequence	Reads	Type	TargetAA	ReferenceAA
[truncated: 7,033 more rows]

## Sheet: A3 CCL4+EV GFAP
TargetSequence	Reads	AvgQScore	Type	Pct	IndelLength	TargetAA	ReferenceAA	WideTargetSeq	WideReference	TargetLeftFlank	TargetRightFlank
[truncated: 4,003 more rows]

## Sheet: A4-CCL4+CR GFAP
Reference sequence	Target sequence	Reads	Type	TargetAA	ReferenceAA
[truncated: 7,426 more rows]

## Sheet: A5-hep Oil+EV GFAP
Reference sequence	Target sequence	Read count	Type	TargetAA	ReferenceAA
[truncated: 7,490 more rows]

## Sheet: A6-hep Oil+CR GFAP
Reference sequence	Target sequence	Read count	Type	TargetAA	ReferenceAA
[truncated: 44 more rows]

## Sheet: A7-Hep CCL4+EV GFAP
Reference sequence	Target sequence	Reads	Type	TargetAA	ReferenceAA
[truncated: 1,228 more rows]

## Sheet: A8-Hep CCL4+CR GFAP
Reference sequence	Target sequence	Reads	Type	TargetAA	ReferenceAA
[truncated: 1,228 more rows]

[truncated: 4 more sheets: A9-Oil+EV LRAT, A10-Oil+CR LRAT, A11 CCl4+EV LRAT, A12-CCL4+CR LRAT]
