# Supplementary material for: Targeting A-kinase anchoring protein 12 phosphorylation in hepatic stellate cells regulates liver injury and fibrosis in mouse models
Source: eLife. 2022 Oct 4;11:e78430. doi: 10.7554/eLife.78430 (PMC9531947; doi:10.7554/eLife.78430)
Supplement: Supplementary file 3. — Genomic DNA of HSCs or hepatocytes isolated from oil or CCl4 injected mice treated with AKAP12 PMUT CRISPR +GFAP-Cas9 were submitted for NGS to Azenta Life Sciences as described under methods. Representative raw reads of WT or base changes are shown for each data set and summarized in the first summary tab of the excel. [file elife-78430-supp3.xlsx]

## Sheet: SUMMARY PMUT
Liver cell type	GFAP-Cas9 samples
HSC	A1-OIL+EV
HSC	A2-Oil+CR PMUT
HSC	A3-CCl4+EV
HSC	A4-CCL4+CR-PMUT
HSC	A5-CCL4+CR-PMUT
HSC	A6-CCL4+CR-PMUT
Hepatocyte	A7 all PMUT data

## Sheet: A1- Oil+EV
Reference	Target sequence	Read count	Type	TargetAA	ReferenceAA
CACGGCGTCTGGAATGCAGGATGAGGTCAGAGCGGTTGGCGAGGAGCAAAGGTCAGAGGAGCCAAAGCGCAGGGTGGATACTTCAGTGTCTTGGGAGGCGTTGATTTGTGTCGGATCGTCCAAGAAGAGAGCGAGGAAGG	CACGGCGTCTGGAATGCAGGATGAGGTCAGAGCGGTTGGCGAGGAGCAAAGGTCAGAGGAGCCAAAGCGCAGGGTGGATACTTCAGTGTCTTGGGAGGCGTTGATTTGTGTCGGATCGTCCAAGAAGAGAGCGAGGAAGG	20555	WT	VKSATLSSTESTASGMQDEVRAVGEEQRSEEPKRRVDTSVSWEALICVGSSKKRARKASSSDDEGGPRTLGGDGHRAEEASKDKE	VKSATLSSTESTASGMQDEVRAVGEEQRSEEPKRRVDTSVSWEALICVGSSKKRARKASSSDDEGGPRTLGGDGHRAEEASKDKE
CACGGCGTCTGGAATGCAGGATGAGGTCAGAGCGGTTGGCGAGGAGCAAAGGTCAGAGGAGCCAAAGCGCAGGGTGGATACTTCAGTGTCTTGGGAGGCGTTGATTTGTGTCGGATCGTCCAAGAAGAGAGCGAGGAAGG	CACGGCGTCTGGAATGCAGGATGAGGTCAGAGCGGTTGGCGAGGAGCAAAGGTCAGAGGAGCCAAAGCGCAGGGTGGATACTTCAGCGTCTTGGGAGGCGTTGATTTGTGTCGGATCGTCCAAGAAGAGAGCGAGGAAGG	16	WT	VKSATLSSTESTASGMQDEVRAVGEEQRSEEPKRRVDTSVSWEALICVGSSKKRARKASSSDDEGGPRTLGGDGHRAEEASKDKE	VKSATLSSTESTASGMQDEVRAVGEEQRSEEPKRRVDTSVSWEALICVGSSKKRARKASSSDDEGGPRTLGGDGHRAEEASKDKE
CACGGCGTCTGGAATGCAGGATGAGGTCAGAGCGGTTGGCGAGGAGCAAAGGTCAGAGGAGCCAAAGCGCAGGGTGGATACTTCAGTGTCTTGGGAGGCGTTGATTTGTGTCGGATCGTCCAAGAAGAGAGCGAGGAAGG	CACGGCGTCTGGAATGCAGGATGAGGTCAGAGCGGTTGGCGAGGAGCAAAGGTCAGAGGAGCCAAAGCGCAGGGTGGATACTTCAGTGTCTTGGGAGGCGTTGATTTGTGTCGGATCGTCCAAGGAGAGAGCGAGGAAGG	16	WT	VKSATLSSTESTASGMQDEVRAVGEEQRSEEPKRRVDTSVSWEALICVGSSKKRARKASSSDDEGGPRTLGGDGHRAEEASKDKE	VKSATLSSTESTASGMQDEVRAVGEEQRSEEPKRRVDTSVSWEALICVGSSKKRARKASSSDDEGGPRTLGGDGHRAEEASKDKE
CACGGCGTCTGGAATGCAGGATGAGGTCAGAGCGGTTGGCGAGGAGCAAAGGTCAGAGGAGCCAAAGCGCAGGGTGGATACTTCAGTGTCTTGGGAGGCGTTGATTTGTGTCGGATCGTCCAAGAAGAGAGCGAGGAAGG	CACGGCGTCTGGAATGCAGGATGAGGTCAGAGCGGTTGGCGAGGAGCAAAGGTCAGAGGAGCCAAAGCGCAGGGTGGATACTTCAGTGTCTTGGGAGGCGTTGATCTGTGTCGGATCGTCCAAGAAGAGAGCGAGGAAGG	15	WT	VKSATLSSTESTASGMQDEVRAVGEEQRSEEPKRRVDTSVSWEALICVGSSKKRARKASSSDDEGGPRTLGGDGHRAEEASKDKE	VKSATLSSTESTASGMQDEVRAVGEEQRSEEPKRRVDTSVSWEALICVGSSKKRARKASSSDDEGGPRTLGGDGHRAEEASKDKE
CACGGCGTCTGGAATGCAGGATGAGGTCAGAGCGGTTGGCGAGGAGCAAAGGTCAGAGGAGCCAAAGCGCAGGGTGGATACTTCAGTGTCTTGGGAGGCGTTGATTTGTGTCGGATCGTCCAAGAAGAGAGCGAGGAAGG	CACGGCGTCTGGAATGCAGGATGAGGTCAGAGCGGTTGGCGAGGAGCAAAGGTCAGAGGAGCCAAAGCGCAGGGTGGATACTTCAGTGTCTTGGGAGGCGTTGATTTGTGTCGGGTCGTCCAAGAAGAGAGCGAGGAAGG	14	WT	VKSATLSSTESTASGMQDEVRAVGEEQRSEEPKRRVDTSVSWEALICVGSSKKRARKASSSDDEGGPRTLGGDGHRAEEASKDKE	VKSATLSSTESTASGMQDEVRAVGEEQRSEEPKRRVDTSVSWEALICVGSSKKRARKASSSDDEGGPRTLGGDGHRAEEASKDKE
CACGGCGTCTGGAATGCAGGATGAGGTCAGAGCGGTTGGCGAGGAGCAAAGGTCAGAGGAGCCAAAGCGCAGGGTGGATACTTCAGTGTCTTGGGAGGCGTTGATTTGTGTCGGATCGTCCAAGAAGAGAGCGAGGAAGG	CACGGCGTCTGGAATGCAGGATGAGGCCAGAGCGGTTGGCGAGGAGCAAAGGTCAGAGGAGCCAAAGCGCAGGGTGGATACTTCAGTGTCTTGGGAGGCGTTGATTTGTGTCGGATCGTCCAAGAAGAGAGCGAGGAAGG	14	WT	VKSATLSSTESTASGMQDEVRAVGEEQRSEEPKRRVDTSVSWEALICVGSSKKRARKASSSDDEGGPRTLGGDGHRAEEASKDKE	VKSATLSSTESTASGMQDEVRAVGEEQRSEEPKRRVDTSVSWEALICVGSSKKRARKASSSDDEGGPRTLGGDGHRAEEASKDKE
CACGGCGTCTGGAATGCAGGATGAGGTCAGAGCGGTTGGCGAGGAGCAAAGGTCAGAGGAGCCAAAGCGCAGGGTGGATACTTCAGTGTCTTGGGAGGCGTTGATTTGTGTCGGATCGTCCAAGAAGAGAGCGAGGAAGG	CACGGCGTCTGGAATGCAGGATGAGGTCAGAGCGGTTGGCGAGGAGCAAAGGTCAGAGGAGCCAAGGCGCAGGGTGGATACTTCAGTGTCTTGGGAGGCGTTGATTTGTGTCGGATCGTCCAAGAAGAGAGCGAGGAAGG	14	WT	VKSATLSSTESTASGMQDEVRAVGEEQRSEEPKRRVDTSVSWEALICVGSSKKRARKASSSDDEGGPRTLGGDGHRAEEASKDKE	VKSATLSSTESTASGMQDEVRAVGEEQRSEEPKRRVDTSVSWEALICVGSSKKRARKASSSDDEGGPRTLGGDGHRAEEASKDKE
CACGGCGTCTGGAATGCAGGATGAGGTCAGAGCGGTTGGCGAGGAGCAAAGGTCAGAGGAGCCAAAGCGCAGGGTGGATACTTCAGTGTCTTGGGAGGCGTTGATTTGTGTCGGATCGTCCAAGAAGAGAGCGAGGAAGG	CACGGCGTCTGGAATGCAGGATGAGGTCAGAGCGGTTGGCGAGGAGCAAAGGTCAGAGGAGCCAAAGCGCAGGGTGGATACTTCAGTGTCTTGGGAGGCGTTGATTTGTGTCGGATCGTCCAAGAAGAGGGCGAGGAAGG	13	WT	VKSATLSSTESTASGMQDEVRAVGEEQRSEEPKRRVDTSVSWEALICVGSSKKRARKASSSDDEGGPRTLGGDGHRAEEASKDKE	VKSATLSSTESTASGMQDEVRAVGEEQRSEEPKRRVDTSVSWEALICVGSSKKRARKASSSDDEGGPRTLGGDGHRAEEASKDKE
CACGGCGTCTGGAATGCAGGATGAGGTCAGAGCGGTTGGCGAGGAGCAAAGGTCAGAGGAGCCAAAGCGCAGGGTGGATACTTCAGTGTCTTGGGAGGCGTTGATTTGTGTCGGATCGTCCAAGAAGAGAGCGAGGAAGG	CACGGCGTCTGGAATGCAGGATGAGGTCAGAGCGGTTGGCGAGGAGCAAAGGTCAGAGGAGCCAAAGCGCAGGGTGGATACTTCAGTGTCTTGGGGGGCGTTGATTTGTGTCGGATCGTCCAAGAAGAGAGCGAGGAAGG	13	WT	VKSATLSSTESTASGMQDEVRAVGEEQRSEEPKRRVDTSVSWEALICVGSSKKRARKASSSDDEGGPRTLGGDGHRAEEASKDKE	VKSATLSSTESTASGMQDEVRAVGEEQRSEEPKRRVDTSVSWEALICVGSSKKRARKASSSDDEGGPRTLGGDGHRAEEASKDKE
CACGGCGTCTGGAATGCAGGATGAGGTCAGAGCGGTTGGCGAGGAGCAAAGGTCAGAGGAGCCAAAGCGCAGGGTGGATACTTCAGTGTCTTGGGAGGCGTTGATTTGTGTCGGATCGTCCAAGAAGAGAGCGAGGAAGG	CACGGCGTCTGGAATGCAGGATGAGGTCAGAGCGGTTGGCGAGGAGCAAAGGTCAGAGGAGCCAAAGCGCAGGGTGGATACTTCAGTGTCTTGGGAGGCGTTGATTTGTGTCGGATCGTCCAAGAAGAGAGCGAGGAGGG	12	WT	VKSATLSSTESTASGMQDEVRAVGEEQRSEEPKRRVDTSVSWEALICVGSSKKRARKASSSDDEGGPRTLGGDGHRAEEASKDKE	VKSATLSSTESTASGMQDEVRAVGEEQRSEEPKRRVDTSVSWEALICVGSSKKRARKASSSDDEGGPRTLGGDGHRAEEASKDKE
CACGGCGTCTGGAATGCAGGATGAGGTCAGAGCGGTTGGCGAGGAGCAAAGGTCAGAGGAGCCAAAGCGCAGGGTGGATACTTCAGTGTCTTGGGAGGCGTTGATTTGTGTCGGATCGTCCAAGAAGAGAGCGAGGAAGG	CACGGCGTCTGGAATGCAGGATGAGGTCAGAGCGGTTGGCGAGGGGCAAAGGTCAGAGGAGCCAAAGCGCAGGGTGGATACTTCAGTGTCTTGGGAGGCGTTGATTTGTGTCGGATCGTCCAAGAAGAGAGCGAGGAAGG	12	WT	VKSATLSSTESTASGMQDEVRAVGEEQRSEEPKRRVDTSVSWEALICVGSSKKRARKASSSDDEGGPRTLGGDGHRAEEASKDKE	VKSATLSSTESTASGMQDEVRAVGEEQRSEEPKRRVDTSVSWEALICVGSSKKRARKASSSDDEGGPRTLGGDGHRAEEASKDKE
CACGGCGTCTGGAATGCAGGATGAGGTCAGAGCGGTTGGCGAGGAGCAAAGGTCAGAGGAGCCAAAGCGCAGGGTGGATACTTCAGTGTCTTGGGAGGCGTTGATTTGTGTCGGATCGTCCAAGAAGAGAGCGAGGAAGG	CACGGCGTCTGGAATGCAGGATGAGGTCAGAGCGGTTGGCGAGGAGCAAAGGTCAGAGGAGCCAAAGCGCAGGGTGGATACTTCAGTGTCTTGGGAGGCGTTGACTTGTGTCGGATCGTCCAAGAAGAGAGCGAGGAAGG	12	WT	VKSATLSSTESTASGMQDEVRAVGEEQRSEEPKRRVDTSVSWEALICVGSSKKRARKASSSDDEGGPRTLGGDGHRAEEASKDKE	VKSATLSSTESTASGMQDEVRAVGEEQRSEEPKRRVDTSVSWEALICVGSSKKRARKASSSDDEGGPRTLGGDGHRAEEASKDKE
CACGGCGTCTGGAATGCAGGATGAGGTCAGAGCGGTTGGCGAGGAGCAAAGGTCAGAGGAGCCAAAGCGCAGGGTGGATACTTCAGTGTCTTGGGAGGCGTTGATTTGTGTCGGATCGTCCAAGAAGAGAGCGAGGAAGG	CACGGCGTCTGGAATGCAGGATGAGGTCAGAGCGGTTGGCGAGGAGCAAAGGTCAGAGGAGCCAAAGCGCAGGGTGGATACTTCAGTGTCTTGGGAGGCGTTGATTTGTGTCGGATCGTCCAAGAAGAGAGCGGGGAAGG	12	WT	VKSATLSSTESTASGMQDEVRAVGEEQRSEEPKRRVDTSVSWEALICVGSSKKRARKASSSDDEGGPRTLGGDGHRAEEASKDKE	VKSATLSSTESTASGMQDEVRAVGEEQRSEEPKRRVDTSVSWEALICVGSSKKRARKASSSDDEGGPRTLGGDGHRAEEASKDKE
CACGGCGTCTGGAATGCAGGATGAGGTCAGAGCGGTTGGCGAGGAGCAAAGGTCAGAGGAGCCAAAGCGCAGGGTGGATACTTCAGTGTCTTGGGAGGCGTTGATTTGTGTCGGATCGTCCAAGAAGAGAGCGAGGAAGG	CACGGCGTCTGGAATGCAGGATGAGGTCAGAGCGGTTGGCGAGGAGCAAAGGTCAGAGGAGCCAAAGCGCAGGGTGGATACTTCAGTGTCTTGGGAGGCGTTGATTTGTGTCGGATCGTCCAAGAAGAGAGCAAGGAAGG	12	WT	VKSATLSSTESTASGMQDEVRAVGEEQRSEEPKRRVDTSVSWEALICVGSSKKRARKASSSDDEGGPRTLGGDGHRAEEASKDKE	VKSATLSSTESTASGMQDEVRAVGEEQRSEEPKRRVDTSVSWEALICVGSSKKRARKASSSDDEGGPRTLGGDGHRAEEASKDKE
CACGGCGTCTGGAATGCAGGATGAGGTCAGAGCGGTTGGCGAGGAGCAAAGGTCAGAGGAGCCAAAGCGCAGGGTGGATACTTCAGTGTCTTGGGAGGCGTTGATTTGTGTCGGATCGTCCAAGAAGAGAGCGAGGAAGG	CACGGCGTCTGGAATGCAGGATGAGGTCAGAGCGGTTGGCGAGGAGCAAAGGTCAGAGGAGCCAAAGCGCAGGGTGGATACTTCAGTGTCTTGGGAGGCGTTGATTTGTGTCGGACCGTCCAAGAAGAGAGCGAGGAAGG	11	WT	VKSATLSSTESTASGMQDEVRAVGEEQRSEEPKRRVDTSVSWEALICVGSSKKRARKASSSDDEGGPRTLGGDGHRAEEASKDKE	VKSATLSSTESTASGMQDEVRAVGEEQRSEEPKRRVDTSVSWEALICVGSSKKRARKASSSDDEGGPRTLGGDGHRAEEASKDKE
CACGGCGTCTGGAATGCAGGATGAGGTCAGAGCGGTTGGCGAGGAGCAAAGGTCAGAGGAGCCAAAGCGCAGGGTGGATACTTCAGTGTCTTGGGAGGCGTTGATTTGTGTCGGATCGTCCAAGAAGAGAGCGAGGAAGG	CACGGCGCCTGGAATGCAGGATGAGGTCAGAGCGGTTGGCGAGGAGCAAAGGTCAGAGGAGCCAAAGCGCAGGGTGGATACTTCAGTGTCTTGGGAGGCGTTGATTTGTGTCGGATCGTCCAAGAAGAGAGCGAGGAAGG	11	WT	VKSATLSSTESTASGMQDEVRAVGEEQRSEEPKRRVDTSVSWEALICVGSSKKRARKASSSDDEGGPRTLGGDGHRAEEASKDKE	VKSATLSSTESTASGMQDEVRAVGEEQRSEEPKRRVDTSVSWEALICVGSSKKRARKASSSDDEGGPRTLGGDGHRAEEASKDKE
CACGGCGTCTGGAATGCAGGATGAGGTCAGAGCGGTTGGCGAGGAGCAAAGGTCAGAGGAGCCAAAGCGCAGGGTGGATACTTCAGTGTCTTGGGAGGCGTTGATTTGTGTCGGATCGTCCAAGAAGAGAGCGAGGAAGG	CACGGCGTCTGGAATGCAGGATGAGGTCAGAGCGGTTGGCGAGGAGCAAAGGTCAGAGGAGCCAAAGCGCAGGGTGGATACTTCAGTGTCTTGGGAGGCGTCGATTTGTGTCGGATCGTCCAAGAAGAGAGCGAGGAAGG	11	WT	VKSATLSSTESTASGMQDEVRAVGEEQRSEEPKRRVDTSVSWEALICVGSSKKRARKASSSDDEGGPRTLGGDGHRAEEASKDKE	VKSATLSSTESTASGMQDEVRAVGEEQRSEEPKRRVDTSVSWEALICVGSSKKRARKASSSDDEGGPRTLGGDGHRAEEASKDKE
CACGGCGTCTGGAATGCAGGATGAGGTCAGAGCGGTTGGCGAGGAGCAAAGGTCAGAGGAGCCAAAGCGCAGGGTGGATACTTCAGTGTCTTGGGAGGCGTTGATTTGTGTCGGATCGTCCAAGAAGAGAGCGAGGAAGG	CGCGGCGTCTGGAATGCAGGATGAGGTCAGAGCGGTTGGCGAGGAGCAAAGGTCAGAGGAGCCAAAGCGCAGGGTGGATACTTCAGTGTCTTGGGAGGCGTTGATTTGTGTCGGATCGTCCAAGAAGAGAGCGAGGAAGG	11	WT	VKSATLSSTESTASGMQDEVRAVGEEQRSEEPKRRVDTSVSWEALICVGSSKKRARKASSSDDEGGPRTLGGDGHRAEEASKDKE	VKSATLSSTESTASGMQDEVRAVGEEQRSEEPKRRVDTSVSWEALICVGSSKKRARKASSSDDEGGPRTLGGDGHRAEEASKDKE
CACGGCGTCTGGAATGCAGGATGAGGTCAGAGCGGTTGGCGAGGAGCAAAGGTCAGAGGAGCCAAAGCGCAGGGTGGATACTTCAGTGTCTTGGGAGGCGTTGATTTGTGTCGGATCGTCCAAGAAGAGAGCGAGGAAGG	CACGGCGTCTGGAATGCAGGATGAGGTCAGAGCGGTTGGCGAGGAGCAAAGGTCAGAGGAGCCAAAGCGCAGGGTGGATACTTCAGTGTCTTGGGAGGCGCTGATTTGTGTCGGATCGTCCAAGAAGAGAGCGAGGAAGG	11	WT	VKSATLSSTESTASGMQDEVRAVGEEQRSEEPKRRVDTSVSWEALICVGSSKKRARKASSSDDEGGPRTLGGDGHRAEEASKDKE	VKSATLSSTESTASGMQDEVRAVGEEQRSEEPKRRVDTSVSWEALICVGSSKKRARKASSSDDEGGPRTLGGDGHRAEEASKDKE
CACGGCGTCTGGAATGCAGGATGAGGTCAGAGCGGTTGGCGAGGAGCAAAGGTCAGAGGAGCCAAAGCGCAGGGTGGATACTTCAGTGTCTTGGGAGGCGTTGATTTGTGTCGGATCGTCCAAGAAGAGAGCGAGGAAGG	CACGGCGTCTGGAATGCAGGATGAGGTCAGAGCGGTTGGCGAGGAGCAAAGGTCAGAGGAGCCAAAGCGCAGGGTGGATACTTCAGTGCCTTGGGAGGCGTTGATTTGTGTCGGATCGTCCAAGAAGAGAGCGAGGAAGG	11	WT	VKSATLSSTESTASGMQDEVRAVGEEQRSEEPKRRVDTSVSWEALICVGSSKKRARKASSSDDEGGPRTLGGDGHRAEEASKDKE	VKSATLSSTESTASGMQDEVRAVGEEQRSEEPKRRVDTSVSWEALICVGSSKKRARKASSSDDEGGPRTLGGDGHRAEEASKDKE
CACGGCGTCTGGAATGCAGGATGAGGTCAGAGCGGTTGGCGAGGAGCAAAGGTCAGAGGAGCCAAAGCGCAGGGTGGATACTTCAGTGTCTTGGGAGGCGTTGATTTGTGTCGGATCGTCCAAGAAGAGAGCGAGGAAGG	CACGGCGTCTGGAATGCAGGATGAGGTCAGAGCGGTTGGCGAGGAGCAAAGGTCAGAGGAGCCAGAGCGCAGGGTGGATACTTCAGTGTCTTGGGAGGCGTTGATTTGTGTCGGATCGTCCAAGAAGAGAGCGAGGAAGG	10	WT	VKSATLSSTESTASGMQDEVRAVGEEQRSEEPKRRVDTSVSWEALICVGSSKKRARKASSSDDEGGPRTLGGDGHRAEEASKDKE	VKSATLSSTESTASGMQDEVRAVGEEQRSEEPKRRVDTSVSWEALICVGSSKKRARKASSSDDEGGPRTLGGDGHRAEEASKDKE
CACGGCGTCTGGAATGCAGGATGAGGTCAGAGCGGTTGGCGAGGAGCAAAGGTCAGAGGAGCCAAAGCGCAGGGTGGATACTTCAGTGTCTTGGGAGGCGTTGATTTGTGTCGGATCGTCCAAGAAGAGAGCGAGGAAGG	CACGGCGTCTGGAATGCAGGATGAGGTCAGAGCGGTTGGCGAGGAGCAAAGGTCAGAGGAGCCAAAGCGCAGGGTGGATACTTCAGTGTCTTGGGAGGCGTTGATTCGTGTCGGATCGTCCAAGAAGAGAGCGAGGAAGG	10	WT	VKSATLSSTESTASGMQDEVRAVGEEQRSEEPKRRVDTSVSWEALICVGSSKKRARKASSSDDEGGPRTLGGDGHRAEEASKDKE	VKSATLSSTESTASGMQDEVRAVGEEQRSEEPKRRVDTSVSWEALICVGSSKKRARKASSSDDEGGPRTLGGDGHRAEEASKDKE
CACGGCGTCTGGAATGCAGGATGAGGTCAGAGCGGTTGGCGAGGAGCAAAGGTCAGAGGAGCCAAAGCGCAGGGTGGATACTTCAGTGTCTTGGGAGGCGTTGATTTGTGTCGGATCGTCCAAGAAGAGAGCGAGGAAGG	CACGGCGTCTGGAATGCAGGATAAGGTCAGAGCGGTTGGCGAGGAGCAAAGGTCAGAGGAGCCAAAGCGCAGGGTGGATACTTCAGTGTCTTGGGAGGCGTTGATTTGTGTCGGATCGTCCAAGAAGAGAGCGAGGAAGG	10	WT	VKSATLSSTESTASGMQDEVRAVGEEQRSEEPKRRVDTSVSWEALICVGSSKKRARKASSSDDEGGPRTLGGDGHRAEEASKDKE	VKSATLSSTESTASGMQDEVRAVGEEQRSEEPKRRVDTSVSWEALICVGSSKKRARKASSSDDEGGPRTLGGDGHRAEEASKDKE
CACGGCGTCTGGAATGCAGGATGAGGTCAGAGCGGTTGGCGAGGAGCAAAGGTCAGAGGAGCCAAAGCGCAGGGTGGATACTTCAGTGTCTTGGGAGGCGTTGATTTGTGTCGGATCGTCCAAGAAGAGAGCGAGGAAGG	CACGGCGTCTGGAATGCGGGATGAGGTCAGAGCGGTTGGCGAGGAGCAAAGGTCAGAGGAGCCAAAGCGCAGGGTGGATACTTCAGTGTCTTGGGAGGCGTTGATTTGTGTCGGATCGTCCAAGAAGAGAGCGAGGAAGG	10	WT	VKSATLSSTESTASGMQDEVRAVGEEQRSEEPKRRVDTSVSWEALICVGSSKKRARKASSSDDEGGPRTLGGDGHRAEEASKDKE	VKSATLSSTESTASGMQDEVRAVGEEQRSEEPKRRVDTSVSWEALICVGSSKKRARKASSSDDEGGPRTLGGDGHRAEEASKDKE
CACGGCGTCTGGAATGCAGGATGAGGTCAGAGCGGTTGGCGAGGAGCAAAGGTCAGAGGAGCCAAAGCGCAGGGTGGATACTTCAGTGTCTTGGGAGGCGTTGATTTGTGTCGGATCGTCCAAGAAGAGAGCGAGGAAGG	CACGGCGTCTGGAATGCAGGATGAGGTCAGAGCGGTTGGCGAGGAGCAGAGGTCAGAGGAGCCAAAGCGCAGGGTGGATACTTCAGTGTCTTGGGAGGCGTTGATTTGTGTCGGATCGTCCAAGAAGAGAGCGAGGAAGG	10	WT	VKSATLSSTESTASGMQDEVRAVGEEQRSEEPKRRVDTSVSWEALICVGSSKKRARKASSSDDEGGPRTLGGDGHRAEEASKDKE	VKSATLSSTESTASGMQDEVRAVGEEQRSEEPKRRVDTSVSWEALICVGSSKKRARKASSSDDEGGPRTLGGDGHRAEEASKDKE
CACGGCGTCTGGAATGCAGGATGAGGTCAGAGCGGTTGGCGAGGAGCAAAGGTCAGAGGAGCCAAAGCGCAGGGTGGATACTTCAGTGTCTTGGGAGGCGTTGATTTGTGTCGGATCGTCCAAGAAGAGAGCGAGGAAGG	CACGGCGTCTGGAATGCAGGATGAGGTCAGAGCGGTTGGCGAGGAGCAAAGGTCAGAGGAGCCAAAGCGCAGGGTGGATACTTCAGTGTCTTGGGAGGCGTTGATTTGTGTCGGATCGTCCAAGAAGGGAGCGAGGAAGG	9	WT	VKSATLSSTESTASGMQDEVRAVGEEQRSEEPKRRVDTSVSWEALICVGSSKKRARKASSSDDEGGPRTLGGDGHRAEEASKDKE	VKSATLSSTESTASGMQDEVRAVGEEQRSEEPKRRVDTSVSWEALICVGSSKKRARKASSSDDEGGPRTLGGDGHRAEEASKDKE
CACGGCGTCTGGAATGCAGGATGAGGTCAGAGCGGTTGGCGAGGAGCAAAGGTCAGAGGAGCCAAAGCGCAGGGTGGATACTTCAGTGTCTTGGGAGGCGTTGATTTGTGTCGGATCGTCCAAGAAGAGAGCGAGGAAGG	CACGGCGTCTGGAATGCAGGATGAGGTCAGAGCGGTTGGCGGGGAGCAAAGGTCAGAGGAGCCAAAGCGCAGGGTGGATACTTCAGTGTCTTGGGAGGCGTTGATTTGTGTCGGATCGTCCAAGAAGAGAGCGAGGAAGG	9	WT	VKSATLSSTESTASGMQDEVRAVGEEQRSEEPKRRVDTSVSWEALICVGSSKKRARKASSSDDEGGPRTLGGDGHRAEEASKDKE	VKSATLSSTESTASGMQDEVRAVGEEQRSEEPKRRVDTSVSWEALICVGSSKKRARKASSSDDEGGPRTLGGDGHRAEEASKDKE
CACGGCGTCTGGAATGCAGGATGAGGTCAGAGCGGTTGGCGAGGAGCAAAGGTCAGAGGAGCCAAAGCGCAGGGTGGATACTTCAGTGTCTTGGGAGGCGTTGATTTGTGTCGGATCGTCCAAGAAGAGAGCGAGGAAGG	CACGGCGTCTGGAGTGCAGGATGAGGTCAGAGCGGTTGGCGAGGAGCAAAGGTCAGAGGAGCCAAAGCGCAGGGTGGATACTTCAGTGTCTTGGGAGGCGTTGATTTGTGTCGGATCGTCCAAGAAGAGAGCGAGGAAGG	9	WT	VKSATLSSTESTASGMQDEVRAVGEEQRSEEPKRRVDTSVSWEALICVGSSKKRARKASSSDDEGGPRTLGGDGHRAEEASKDKE	VKSATLSSTESTASGMQDEVRAVGEEQRSEEPKRRVDTSVSWEALICVGSSKKRARKASSSDDEGGPRTLGGDGHRAEEASKDKE
CACGGCGTCTGGAATGCAGGATGAGGTCAGAGCGGTTGGCGAGGAGCAAAGGTCAGAGGAGCCAAAGCGCAGGGTGGATACTTCAGTGTCTTGGGAGGCGTTGATTTGTGTCGGATCGTCCAAGAAGAGAGCGAGGAAGG	CACGGCGTCTGGAATGCAGGATGAGGTCAGAGCGGTTGGCGAGGAGCAAAGGTCAGAGGAGCCAAAGCGCAGGGTGGATACCTCAGTGTCTTGGGAGGCGTTGATTTGTGTCGGATCGTCCAAGAAGAGAGCGAGGAAGG	9	WT	VKSATLSSTESTASGMQDEVRAVGEEQRSEEPKRRVDTSVSWEALICVGSSKKRARKASSSDDEGGPRTLGGDGHRAEEASKDKE	VKSATLSSTESTASGMQDEVRAVGEEQRSEEPKRRVDTSVSWEALICVGSSKKRARKASSSDDEGGPRTLGGDGHRAEEASKDKE
CACGGCGTCTGGAATGCAGGATGAGGTCAGAGCGGTTGGCGAGGAGCAAAGGTCAGAGGAGCCAAAGCGCAGGGTGGATACTTCAGTGTCTTGGGAGGCGTTGATTTGTGTCGGATCGTCCAAGAAGAGAGCGAGGAAGG	CACGGCGTCCGGAATGCAGGATGAGGTCAGAGCGGTTGGCGAGGAGCAAAGGTCAGAGGAGCCAAAGCGCAGGGTGGATACTTCAGTGTCTTGGGAGGCGTTGATTTGTGTCGGATCGTCCAAGAAGAGAGCGAGGAAGG	9	WT	VKSATLSSTESTASGMQDEVRAVGEEQRSEEPKRRVDTSVSWEALICVGSSKKRARKASSSDDEGGPRTLGGDGHRAEEASKDKE	VKSATLSSTESTASGMQDEVRAVGEEQRSEEPKRRVDTSVSWEALICVGSSKKRARKASSSDDEGGPRTLGGDGHRAEEASKDKE
CACGGCGTCTGGAATGCAGGATGAGGTCAGAGCGGTTGGCGAGGAGCAAAGGTCAGAGGAGCCAAAGCGCAGGGTGGATACTTCAGTGTCTTGGGAGGCGTTGATTTGTGTCGGATCGTCCAAGAAGAGAGCGAGGAAGG	CACGGCGTCTGGAATGCAGGATGAGGTCAGAGCGGTTGGCGAGGAGCAAAGGTCAGAGGGGCCAAAGCGCAGGGTGGATACTTCAGTGTCTTGGGAGGCGTTGATTTGTGTCGGATCGTCCAAGAAGAGAGCGAGGAAGG	9	WT	VKSATLSSTESTASGMQDEVRAVGEEQRSEEPKRRVDTSVSWEALICVGSSKKRARKASSSDDEGGPRTLGGDGHRAEEASKDKE	VKSATLSSTESTASGMQDEVRAVGEEQRSEEPKRRVDTSVSWEALICVGSSKKRARKASSSDDEGGPRTLGGDGHRAEEASKDKE
CACGGCGTCTGGAATGCAGGATGAGGTCAGAGCGGTTGGCGAGGAGCAAAGGTCAGAGGAGCCAAAGCGCAGGGTGGATACTTCAGTGTCTTGGGAGGCGTTGATTTGTGTCGGATCGTCCAAGAAGAGAGCGAGGAAGG	CACGGCGTCTGGAATGCAGGATGAGGTCAGAGCGGTTGGCGAGGAGCAAGGGTCAGAGGAGCCAAAGCGCAGGGTGGATACTTCAGTGTCTTGGGAGGCGTTGATTTGTGTCGGATCGTCCAAGAAGAGAGCGAGGAAGG	8	WT	VKSATLSSTESTASGMQDEVRAVGEEQRSEEPKRRVDTSVSWEALICVGSSKKRARKASSSDDEGGPRTLGGDGHRAEEASKDKE	VKSATLSSTESTASGMQDEVRAVGEEQRSEEPKRRVDTSVSWEALICVGSSKKRARKASSSDDEGGPRTLGGDGHRAEEASKDKE
CACGGCGTCTGGAATGCAGGATGAGGTCAGAGCGGTTGGCGAGGAGCAAAGGTCAGAGGAGCCAAAGCGCAGGGTGGATACTTCAGTGTCTTGGGAGGCGTTGATTTGTGTCGGATCGTCCAAGAAGAGAGCGAGGAAGG	CACGGCGTCTGGAATGCAGGATGAGGTCAGAGCGGTTGGCGAGGAGCAAAGGTCAGAGGAGCCAAAGCGCAGGGTGGATACTTCAGTGTCCTGGGAGGCGTTGATTTGTGTCGGATCGTCCAAGAAGAGAGCGAGGAAGG	8	WT	VKSATLSSTESTASGMQDEVRAVGEEQRSEEPKRRVDTSVSWEALICVGSSKKRARKASSSDDEGGPRTLGGDGHRAEEASKDKE	VKSATLSSTESTASGMQDEVRAVGEEQRSEEPKRRVDTSVSWEALICVGSSKKRARKASSSDDEGGPRTLGGDGHRAEEASKDKE
CACGGCGTCTGGAATGCAGGATGAGGTCAGAGCGGTTGGCGAGGAGCAAAGGTCAGAGGAGCCAAAGCGCAGGGTGGATACTTCAGTGTCTTGGGAGGCGTTGATTTGTGTCGGATCGTCCAAGAAGAGAGCGAGGAAGG	CACGGCGTCTGGAATGCAGGATGAGGTCAGAGCGGTTGGCGAGGAGCAAAGGTCAGAGGAGCCAAAGCGCAGGGTGGATACTTCAGTGTCTTGGGAGGCGTTGATTTGTGCCGGATCGTCCAAGAAGAGAGCGAGGAAGG	8	WT	VKSATLSSTESTASGMQDEVRAVGEEQRSEEPKRRVDTSVSWEALICVGSSKKRARKASSSDDEGGPRTLGGDGHRAEEASKDKE	VKSATLSSTESTASGMQDEVRAVGEEQRSEEPKRRVDTSVSWEALICVGSSKKRARKASSSDDEGGPRTLGGDGHRAEEASKDKE
CACGGCGTCTGGAATGCAGGATGAGGTCAGAGCGGTTGGCGAGGAGCAAAGGTCAGAGGAGCCAAAGCGCAGGGTGGATACTTCAGTGTCTTGGGAGGCGTTGATTTGTGTCGGATCGTCCAAGAAGAGAGCGAGGAAGG	CACGGCGTCTGGAATGCAGGATGAGGTCAGGGCGGTTGGCGAGGAGCAAAGGTCAGAGGAGCCAAAGCGCAGGGTGGATACTTCAGTGTCTTGGGAGGCGTTGATTTGTGTCGGATCGTCCAAGAAGAGAGCGAGGAAGG	8	WT	VKSATLSSTESTASGMQDEVRAVGEEQRSEEPKRRVDTSVSWEALICVGSSKKRARKASSSDDEGGPRTLGGDGHRAEEASKDKE	VKSATLSSTESTASGMQDEVRAVGEEQRSEEPKRRVDTSVSWEALICVGSSKKRARKASSSDDEGGPRTLGGDGHRAEEASKDKE
CACGGCGTCTGGAATGCAGGATGAGGTCAGAGCGGTTGGCGAGGAGCAAAGGTCAGAGGAGCCAAAGCGCAGGGTGGATACTTCAGTGTCTTGGGAGGCGTTGATTTGTGTCGGATCGTCCAAGAAGAGAGCGAGGAAGG	CACGGCGTCTGGAATGCAGGATGAGGTCAGAGCGGTTGGCGAGGAGCAAAGGTCAGAGGAGCCAAAGCGCAGGGTGGATACTTCAGTGTCTTGGGAGGCGTTGATTTGTGTCGGATCGTCCGAGAAGAGAGCGAGGAAGG	8	WT	VKSATLSSTESTASGMQDEVRAVGEEQRSEEPKRRVDTSVSWEALICVGSSKKRARKASSSDDEGGPRTLGGDGHRAEEASKDKE	VKSATLSSTESTASGMQDEVRAVGEEQRSEEPKRRVDTSVSWEALICVGSSKKRARKASSSDDEGGPRTLGGDGHRAEEASKDKE
CACGGCGTCTGGAATGCAGGATGAGGTCAGAGCGGTTGGCGAGGAGCAAAGGTCAGAGGAGCCAAAGCGCAGGGTGGATACTTCAGTGTCTTGGGAGGCGTTGATTTGTGTCGGATCGTCCAAGAAGAGAGCGAGGAAGG	CACGGCGTCTGGAATGCAGGATGAGGTCAGAGCGGCTGGCGAGGAGCAAAGGTCAGAGGAGCCAAAGCGCAGGGTGGATACTTCAGTGTCTTGGGAGGCGTTGATTTGTGTCGGATCGTCCAAGAAGAGAGCGAGGAAGG	7	WT	VKSATLSSTESTASGMQDEVRAVGEEQRSEEPKRRVDTSVSWEALICVGSSKKRARKASSSDDEGGPRTLGGDGHRAEEASKDKE	VKSATLSSTESTASGMQDEVRAVGEEQRSEEPKRRVDTSVSWEALICVGSSKKRARKASSSDDEGGPRTLGGDGHRAEEASKDKE
CACGGCGTCTGGAATGCAGGATGAGGTCAGAGCGGTTGGCGAGGAGCAAAGGTCAGAGGAGCCAAAGCGCAGGGTGGATACTTCAGTGTCTTGGGAGGCGTTGATTTGTGTCGGATCGTCCAAGAAGAGAGCGAGGAAGG	CACGGCGTCTGGGATGCAGGATGAGGTCAGAGCGGTTGGCGAGGAGCAAAGGTCAGAGGAGCCAAAGCGCAGGGTGGATACTTCAGTGTCTTGGGAGGCGTTGATTTGTGTCGGATCGTCCAAGAAGAGAGCGAGGAAGG	7	WT	VKSATLSSTESTASGMQDEVRAVGEEQRSEEPKRRVDTSVSWEALICVGSSKKRARKASSSDDEGGPRTLGGDGHRAEEASKDKE	VKSATLSSTESTASGMQDEVRAVGEEQRSEEPKRRVDTSVSWEALICVGSSKKRARKASSSDDEGGPRTLGGDGHRAEEASKDKE
CACGGCGTCTGGAATGCAGGATGAGGTCAGAGCGGTTGGCGAGGAGCAAAGGTCAGAGGAGCCAAAGCGCAGGGTGGATACTTCAGTGTCTTGGGAGGCGTTGATTTGTGTCGGATCGTCCAAGAAGAGAGCGAGGAAGG	CACGGCGTCTGGAATGCAGGATGAGGTCAGAGCGGTTGGCGAGGAGCAAAGGTCAGAGGAGCCAAAGCGCAGGGTGGATACTTCAGTGTCTTGGGAGGCGTTGATTTGTGTCGGATCGCCCAAGAAGAGAGCGAGGAAGG	7	WT	VKSATLSSTESTASGMQDEVRAVGEEQRSEEPKRRVDTSVSWEALICVGSSKKRARKASSSDDEGGPRTLGGDGHRAEEASKDKE	VKSATLSSTESTASGMQDEVRAVGEEQRSEEPKRRVDTSVSWEALICVGSSKKRARKASSSDDEGGPRTLGGDGHRAEEASKDKE
CACGGCGTCTGGAATGCAGGATGAGGTCAGAGCGGTTGGCGAGGAGCAAAGGTCAGAGGAGCCAAAGCGCAGGGTGGATACTTCAGTGTCTTGGGAGGCGTTGATTTGTGTCGGATCGTCCAAGAAGAGAGCGAGGAAGG	CACGGCGTCTGGAATGCAGGATGAGGTCAGAGCGGTTGGCGAGGAGCAAAGGTCAGAGGAGCCAAAGCGCAGGGTGGATACTTCAGTGTCTTGGGAGGCGTTGGTTTGTGTCGGATCGTCCAAGAAGAGAGCGAGGAAGG	7	WT	VKSATLSSTESTASGMQDEVRAVGEEQRSEEPKRRVDTSVSWEALICVGSSKKRARKASSSDDEGGPRTLGGDGHRAEEASKDKE	VKSATLSSTESTASGMQDEVRAVGEEQRSEEPKRRVDTSVSWEALICVGSSKKRARKASSSDDEGGPRTLGGDGHRAEEASKDKE
CACGGCGTCTGGAATGCAGGATGAGGTCAGAGCGGTTGGCGAGGAGCAAAGGTCAGAGGAGCCAAAGCGCAGGGTGGATACTTCAGTGTCTTGGGAGGCGTTGATTTGTGTCGGATCGTCCAAGAAGAGAGCGAGGAAGG	CACGGCGTCTGGAATGCAGGATGAGGTCAGAGCGGTTGGCGAGGAGCAAAGGTCAGAGGAGCCAAAGCGCAGGGCGGATACTTCAGTGTCTTGGGAGGCGTTGATTTGTGTCGGATCGTCCAAGAAGAGAGCGAGGAAGG	7	WT	VKSATLSSTESTASGMQDEVRAVGEEQRSEEPKRRVDTSVSWEALICVGSSKKRARKASSSDDEGGPRTLGGDGHRAEEASKDKE	VKSATLSSTESTASGMQDEVRAVGEEQRSEEPKRRVDTSVSWEALICVGSSKKRARKASSSDDEGGPRTLGGDGHRAEEASKDKE
CACGGCGTCTGGAATGCAGGATGAGGTCAGAGCGGTTGGCGAGGAGCAAAGGTCAGAGGAGCCAAAGCGCAGGGTGGATACTTCAGTGTCTTGGGAGGCGTTGATTTGTGTCGGATCGTCCAAGAAGAGAGCGAGGAAGG	CACGGCGTCTGGAATGCAGGATGAGGTCAGAGCGGTTGGCGAGGAGCAAAGGTCAGAGGAGCCAAAGCGCAGGGTGGATACTTCGGTGTCTTGGGAGGCGTTGATTTGTGTCGGATCGTCCAAGAAGAGAGCGAGGAAGG	7	WT	VKSATLSSTESTASGMQDEVRAVGEEQRSEEPKRRVDTSVSWEALICVGSSKKRARKASSSDDEGGPRTLGGDGHRAEEASKDKE	VKSATLSSTESTASGMQDEVRAVGEEQRSEEPKRRVDTSVSWEALICVGSSKKRARKASSSDDEGGPRTLGGDGHRAEEASKDKE
CACGGCGTCTGGAATGCAGGATGAGGTCAGAGCGGTTGGCGAGGAGCAAAGGTCAGAGGAGCCAAAGCGCAGGGTGGATACTTCAGTGTCTTGGGAGGCGTTGATTTGTGTCGGATCGTCCAAGAAGAGAGCGAGGAAGG	CACGGCGTCTGGAATGCAGGATGAGGTCAGAGCGGTTGGCGAGGAGCAAAGGTCAGAGGAGCCAAAGCGTAGGGTGGATACTTCAGTGTCTTGGGAGGCGTTGATTTGTGTCGGATCGTCCAAGAAGAGAGCGAGGAAGG	7	WT	VKSATLSSTESTASGMQDEVRAVGEEQRSEEPKRRVDTSVSWEALICVGSSKKRARKASSSDDEGGPRTLGGDGHRAEEASKDKE	VKSATLSSTESTASGMQDEVRAVGEEQRSEEPKRRVDTSVSWEALICVGSSKKRARKASSSDDEGGPRTLGGDGHRAEEASKDKE
CACGGCGTCTGGAATGCAGGATGAGGTCAGAGCGGTTGGCGAGGAGCAAAGGTCAGAGGAGCCAAAGCGCAGGGTGGATACTTCAGTGTCTTGGGAGGCGTTGATTTGTGTCGGATCGTCCAAGAAGAGAGCGAGGAAGG	CACGGCGTCTGGAATGCAGGATGAGGTCAGAGCGGTTGGCGAGGAGCAAAGGTCAGAGGAGCCAAAGCGCAGGGTGGATACTTCAGTGTCTTGGGAGGCGTTGATTTGTGTCGGATCGTCCAAGAAGAGAGCGAGGGAGG	6	WT	VKSATLSSTESTASGMQDEVRAVGEEQRSEEPKRRVDTSVSWEALICVGSSKKRARKASSSDDEGGPRTLGGDGHRAEEASKDKE	VKSATLSSTESTASGMQDEVRAVGEEQRSEEPKRRVDTSVSWEALICVGSSKKRARKASSSDDEGGPRTLGGDGHRAEEASKDKE
CACGGCGTCTGGAATGCAGGATGAGGTCAGAGCGGTTGGCGAGGAGCAAAGGTCAGAGGAGCCAAAGCGCAGGGTGGATACTTCAGTGTCTTGGGAGGCGTTGATTTGTGTCGGATCGTCCAAGAAGAGAGCGAGGAAGG	CACGGCGTCTGGAATGCAGGATGAGGTCAGAGCGGTTGGCGAGGAGCAAAGGCCAGAGGAGCCAAAGCGCAGGGTGGATACTTCAGTGTCTTGGGAGGCGTTGATTTGTGTCGGATCGTCCAAGAAGAGAGCGAGGAAGG	6	WT	VKSATLSSTESTASGMQDEVRAVGEEQRSEEPKRRVDTSVSWEALICVGSSKKRARKASSSDDEGGPRTLGGDGHRAEEASKDKE	VKSATLSSTESTASGMQDEVRAVGEEQRSEEPKRRVDTSVSWEALICVGSSKKRARKASSSDDEGGPRTLGGDGHRAEEASKDKE
CACGGCGTCTGGAATGCAGGATGAGGTCAGAGCGGTTGGCGAGGAGCAAAGGTCAGAGGAGCCAAAGCGCAGGGTGGATACTTCAGTGTCTTGGGAGGCGTTGATTTGTGTCGGATCGTCCAAGAAGAGAGCGAGGAAGG	CACGGCGTCTGGAATGCAGGATGAGGTCAGAGCGGTTGGCGAGGAGCAAAGGTCAGAGGAGCCAAAGCGCAGGGTGGATACTTCAGTGTCTTGGGAGGCATTGATTTGTGTCGGATCGTCCAAGAAGAGAGCGAGGAAGG	6	WT	VKSATLSSTESTASGMQDEVRAVGEEQRSEEPKRRVDTSVSWEALICVGSSKKRARKASSSDDEGGPRTLGGDGHRAEEASKDKE	VKSATLSSTESTASGMQDEVRAVGEEQRSEEPKRRVDTSVSWEALICVGSSKKRARKASSSDDEGGPRTLGGDGHRAEEASKDKE
CACGGCGTCTGGAATGCAGGATGAGGTCAGAGCGGTTGGCGAGGAGCAAAGGTCAGAGGAGCCAAAGCGCAGGGTGGATACTTCAGTGTCTTGGGAGGCGTTGATTTGTGTCGGATCGTCCAAGAAGAGAGCGAGGAAGG	CACGGCGTCTGGAATGCAGGATGAGGTCAGAGCGGTTGGCGAGGAGCAAAGGTCAGAGGAGCCAAAGCGCAGGGTGGATACTTCAGTGTCTTGGGAGGCGTTGATTTGTGTCGGATCGTCCAAGAAGAGAGCGTGGAAGG	6	WT	VKSATLSSTESTASGMQDEVRAVGEEQRSEEPKRRVDTSVSWEALICVGSSKKRARKASSSDDEGGPRTLGGDGHRAEEASKDKE	VKSATLSSTESTASGMQDEVRAVGEEQRSEEPKRRVDTSVSWEALICVGSSKKRARKASSSDDEGGPRTLGGDGHRAEEASKDKE
CACGGCGTCTGGAATGCAGGATGAGGTCAGAGCGGTTGGCGAGGAGCAAAGGTCAGAGGAGCCAAAGCGCAGGGTGGATACTTCAGTGTCTTGGGAGGCGTTGATTTGTGTCGGATCGTCCAAGAAGAGAGCGAGGAAGG	CACGGCGTCTGGAATGCAGGATGAGGTCAGAGCGGTTGGCGAGGAGCAAAGGTCAGAGGAGCCAAAGCGCAGGGTGGATACTCCAGTGTCTTGGGAGGCGTTGATTTGTGTCGGATCGTCCAAGAAGAGAGCGAGGAAGG	6	WT	VKSATLSSTESTASGMQDEVRAVGEEQRSEEPKRRVDTSVSWEALICVGSSKKRARKASSSDDEGGPRTLGGDGHRAEEASKDKE	VKSATLSSTESTASGMQDEVRAVGEEQRSEEPKRRVDTSVSWEALICVGSSKKRARKASSSDDEGGPRTLGGDGHRAEEASKDKE
CACGGCGTCTGGAATGCAGGATGAGGTCAGAGCGGTTGGCGAGGAGCAAAGGTCAGAGGAGCCAAAGCGCAGGGTGGATACTTCAGTGTCTTGGGAGGCGTTGATTTGTGTCGGATCGTCCAAGAAGAGAGCGAGGAAGG	CACGGCGTCTGGAATGCAGGATGAGGTCAGAGCGGTTGGCGAGGAGCAAAGGTCGGAGGAGCCAAAGCGCAGGGTGGATACTTCAGTGTCTTGGGAGGCGTTGATTTGTGTCGGATCGTCCAAGAAGAGAGCGAGGAAGG	6	WT	VKSATLSSTESTASGMQDEVRAVGEEQRSEEPKRRVDTSVSWEALICVGSSKKRARKASSSDDEGGPRTLGGDGHRAEEASKDKE	VKSATLSSTESTASGMQDEVRAVGEEQRSEEPKRRVDTSVSWEALICVGSSKKRARKASSSDDEGGPRTLGGDGHRAEEASKDKE
CACGGCGTCTGGAATGCAGGATGAGGTCAGAGCGGTTGGCGAGGAGCAAAGGTCAGAGGAGCCAAAGCGCAGGGTGGATACTTCAGTGTCTTGGGAGGCGTTGATTTGTGTCGGATCGTCCAAGAAGAGAGCGAGGAAGG	CACGGCGTCTGGAATGCAGGATGAGGTCAGAGCGGTTGGCGAGGAGCAAAGGTCAGAGGAGCCAAAGCGCAGGGTGGGTACTTCAGTGTCTTGGGAGGCGTTGATTTGTGTCGGATCGTCCAAGAAGAGAGCGAGGAAGG	6	WT	VKSATLSSTESTASGMQDEVRAVGEEQRSEEPKRRVDTSVSWEALICVGSSKKRARKASSSDDEGGPRTLGGDGHRAEEASKDKE	VKSATLSSTESTASGMQDEVRAVGEEQRSEEPKRRVDTSVSWEALICVGSSKKRARKASSSDDEGGPRTLGGDGHRAEEASKDKE
CACGGCGTCTGGAATGCAGGATGAGGTCAGAGCGGTTGGCGAGGAGCAAAGGTCAGAGGAGCCAAAGCGCAGGGTGGATACTTCAGTGTCTTGGGAGGCGTTGATTTGTGTCGGATCGTCCAAGAAGAGAGCGAGGAAGG	CACGGCGTCTGGAATACAGGATGAGGTCAGAGCGGTTGGCGAGGAGCAAAGGTCAGAGGAGCCAAAGCGCAGGGTGGATACTTCAGTGTCTTGGGAGGCGTTGATTTGTGTCGGATCGTCCAAGAAGAGAGCGAGGAAGG	6	WT	VKSATLSSTESTASGMQDEVRAVGEEQRSEEPKRRVDTSVSWEALICVGSSKKRARKASSSDDEGGPRTLGGDGHRAEEASKDKE	VKSATLSSTESTASGMQDEVRAVGEEQRSEEPKRRVDTSVSWEALICVGSSKKRARKASSSDDEGGPRTLGGDGHRAEEASKDKE
CACGGCGTCTGGAATGCAGGATGAGGTCAGAGCGGTTGGCGAGGAGCAAAGGTCAGAGGAGCCAAAGCGCAGGGTGGATACTTCAGTGTCTTGGGAGGCGTTGATTTGTGTCGGATCGTCCAAGAAGAGAGCGAGGAAGG	CACGGCGTTTGGAATGCAGGATGAGGTCAGAGCGGTTGGCGAGGAGCAAAGGTCAGAGGAGCCAAAGCGCAGGGTGGATACTTCAGTGTCTTGGGAGGCGTTGATTTGTGTCGGATCGTCCAAGAAGAGAGCGAGGAAGG	5	WT	VKSATLSSTESTASGMQDEVRAVGEEQRSEEPKRRVDTSVSWEALICVGSSKKRARKASSSDDEGGPRTLGGDGHRAEEASKDKE	VKSATLSSTESTASGMQDEVRAVGEEQRSEEPKRRVDTSVSWEALICVGSSKKRARKASSSDDEGGPRTLGGDGHRAEEASKDKE
CACGGCGTCTGGAATGCAGGATGAGGTCAGAGCGGTTGGCGAGGAGCAAAGGTCAGAGGAGCCAAAGCGCAGGGTGGATACTTCAGTGTCTTGGGAGGCGTTGATTTGTGTCGGATCGTCCAAGAAGAGAGCGAGGAAGG	CACGGCGTCTGGAATGCAGGATGAGGTCAGAGCGGTTGGCGAGGAGCAAAGGTCAGAGGAGCCAAAGCGCAGGATGGATACTTCAGTGTCTTGGGAGGCGTTGATTTGTGTCGGATCGTCCAAGAAGAGAGCGAGGAAGG	5	WT	VKSATLSSTESTASGMQDEVRAVGEEQRSEEPKRRVDTSVSWEALICVGSSKKRARKASSSDDEGGPRTLGGDGHRAEEASKDKE	VKSATLSSTESTASGMQDEVRAVGEEQRSEEPKRRVDTSVSWEALICVGSSKKRARKASSSDDEGGPRTLGGDGHRAEEASKDKE
CACGGCGTCTGGAATGCAGGATGAGGTCAGAGCGGTTGGCGAGGAGCAAAGGTCAGAGGAGCCAAAGCGCAGGGTGGATACTTCAGTGTCTTGGGAGGCGTTGATTTGTGTCGGATCGTCCAAGAAGAGAGCGAGGAAGG	CACGGCGTCTGGAATGCAGGGTGAGGTCAGAGCGGTTGGCGAGGAGCAAAGGTCAGAGGAGCCAAAGCGCAGGGTGGATACTTCAGTGTCTTGGGAGGCGTTGATTTGTGTCGGATCGTCCAAGAAGAGAGCGAGGAAGG	5	WT	VKSATLSSTESTASGMQDEVRAVGEEQRSEEPKRRVDTSVSWEALICVGSSKKRARKASSSDDEGGPRTLGGDGHRAEEASKDKE	VKSATLSSTESTASGMQDEVRAVGEEQRSEEPKRRVDTSVSWEALICVGSSKKRARKASSSDDEGGPRTLGGDGHRAEEASKDKE
CACGGCGTCTGGAATGCAGGATGAGGTCAGAGCGGTTGGCGAGGAGCAAAGGTCAGAGGAGCCAAAGCGCAGGGTGGATACTTCAGTGTCTTGGGAGGCGTTGATTTGTGTCGGATCGTCCAAGAAGAGAGCGAGGAAGG	TACGGCGTCTGGAATGCAGGATGAGGTCAGAGCGGTTGGCGAGGAGCAAAGGTCAGAGGAGCCAAAGCGCAGGGTGGATACTTCAGTGTCTTGGGAGGCGTTGATTTGTGTCGGATCGTCCAAGAAGAGAGCGAGGAAGG	5	WT	VKSATLSSTESTASGMQDEVRAVGEEQRSEEPKRRVDTSVSWEALICVGSSKKRARKASSSDDEGGPRTLGGDGHRAEEASKDKE	VKSATLSSTESTASGMQDEVRAVGEEQRSEEPKRRVDTSVSWEALICVGSSKKRARKASSSDDEGGPRTLGGDGHRAEEASKDKE
CACGGCGTCTGGAATGCAGGATGAGGTCAGAGCGGTTGGCGAGGAGCAAAGGTCAGAGGAGCCAAAGCGCAGGGTGGATACTTCAGTGTCTTGGGAGGCGTTGATTTGTGTCGGATCGTCCAAGAAGAGAGCGAGGAAGG	CACGGCGTCTGGAATGCAGGATGAGGTCAGAGCGGTTGGCGAGGAGCAAAGGTCAGAGGAGCCAAAGCGCGGGGTGGATACTTCAGTGTCTTGGGAGGCGTTGATTTGTGTCGGATCGTCCAAGAAGAGAGCGAGGAAGG	5	WT	VKSATLSSTESTASGMQDEVRAVGEEQRSEEPKRRVDTSVSWEALICVGSSKKRARKASSSDDEGGPRTLGGDGHRAEEASKDKE	VKSATLSSTESTASGMQDEVRAVGEEQRSEEPKRRVDTSVSWEALICVGSSKKRARKASSSDDEGGPRTLGGDGHRAEEASKDKE
CACGGCGTCTGGAATGCAGGATGAGGTCAGAGCGGTTGGCGAGGAGCAAAGGTCAGAGGAGCCAAAGCGCAGGGTGGATACTTCAGTGTCTTGGGAGGCGTTGATTTGTGTCGGATCGTCCAAGAAGAGAGCGAGGAAGG	CACGGCGTCTGGAATGCAGGATGAGGTCAGAGCGGTTGGCGAGGAGCGAAGGTCAGAGGAGCCAAAGCGCAGGGTGGATACTTCAGTGTCTTGGGAGGCGTTGATTTGTGTCGGATCGTCCAAGAAGAGAGCGAGGAAGG	5	WT	VKSATLSSTESTASGMQDEVRAVGEEQRSEEPKRRVDTSVSWEALICVGSSKKRARKASSSDDEGGPRTLGGDGHRAEEASKDKE	VKSATLSSTESTASGMQDEVRAVGEEQRSEEPKRRVDTSVSWEALICVGSSKKRARKASSSDDEGGPRTLGGDGHRAEEASKDKE
CACGGCGTCTGGAATGCAGGATGAGGTCAGAGCGGTTGGCGAGGAGCAAAGGTCAGAGGAGCCAAAGCGCAGGGTGGATACTTCAGTGTCTTGGGAGGCGTTGATTTGTGTCGGATCGTCCAAGAAGAGAGCGAGGAAGG	CACGGCGTCTGGAATGCAGGATGAGGTCAGAGCGGTTGGCGAGGAGCAAAGGTCAGAGGAGCCAAAGCGCAGGGTGGATACTTCAGTGTCTTGGGAGGCGTTGATTTATGTCGGATCGTCCAAGAAGAGAGCGAGGAAGG	5	WT	VKSATLSSTESTASGMQDEVRAVGEEQRSEEPKRRVDTSVSWEALICVGSSKKRARKASSSDDEGGPRTLGGDGHRAEEASKDKE	VKSATLSSTESTASGMQDEVRAVGEEQRSEEPKRRVDTSVSWEALICVGSSKKRARKASSSDDEGGPRTLGGDGHRAEEASKDKE
CACGGCGTCTGGAATGCAGGATGAGGTCAGAGCGGTTGGCGAGGAGCAAAGGTCAGAGGAGCCAAAGCGCAGGGTGGATACTTCAGTGTCTTGGGAGGCGTTGATTTGTGTCGGATCGTCCAAGAAGAGAGCGAGGAAGG	CACGGCGTCTGGAATGCAGGATGAGGTCAGAGCGGTCGGCGAGGAGCAAAGGTCAGAGGAGCCAAAGCGCAGGGTGGATACTTCAGTGTCTTGGGAGGCGTTGATTTGTGTCGGATCGTCCAAGAAGAGAGCGAGGAAGG	5	WT	VKSATLSSTESTASGMQDEVRAVGEEQRSEEPKRRVDTSVSWEALICVGSSKKRARKASSSDDEGGPRTLGGDGHRAEEASKDKE	VKSATLSSTESTASGMQDEVRAVGEEQRSEEPKRRVDTSVSWEALICVGSSKKRARKASSSDDEGGPRTLGGDGHRAEEASKDKE
CACGGCGTCTGGAATGCAGGATGAGGTCAGAGCGGTTGGCGAGGAGCAAAGGTCAGAGGAGCCAAAGCGCAGGGTGGATACTTCAGTGTCTTGGGAGGCGTTGATTTGTGTCGGATCGTCCAAGAAGAGAGCGAGGAAGG	CACGGCGTCTGGAATGCAGGATGGGGTCAGAGCGGTTGGCGAGGAGCAAAGGTCAGAGGAGCCAAAGCGCAGGGTGGATACTTCAGTGTCTTGGGAGGCGTTGATTTGTGTCGGATCGTCCAAGAAGAGAGCGAGGAAGG	5	WT	VKSATLSSTESTASGMQDEVRAVGEEQRSEEPKRRVDTSVSWEALICVGSSKKRARKASSSDDEGGPRTLGGDGHRAEEASKDKE	VKSATLSSTESTASGMQDEVRAVGEEQRSEEPKRRVDTSVSWEALICVGSSKKRARKASSSDDEGGPRTLGGDGHRAEEASKDKE
CACGGCGTCTGGAATGCAGGATGAGGTCAGAGCGGTTGGCGAGGAGCAAAGGTCAGAGGAGCCAAAGCGCAGGGTGGATACTTCAGTGTCTTGGGAGGCGTTGATTTGTGTCGGATCGTCCAAGAAGAGAGCGAGGAAGG	CACGGCGTCTGGAATGCAGGATGAGGTCAGAGCGGTTGGCGAGGAGCAAAGGTCAGAGGAGCCAAAGTGCAGGGTGGATACTTCAGTGTCTTGGGAGGCGTTGATTTGTGTCGGATCGTCCAAGAAGAGAGCGAGGAAGG	5	WT	VKSATLSSTESTASGMQDEVRAVGEEQRSEEPKRRVDTSVSWEALICVGSSKKRARKASSSDDEGGPRTLGGDGHRAEEASKDKE	VKSATLSSTESTASGMQDEVRAVGEEQRSEEPKRRVDTSVSWEALICVGSSKKRARKASSSDDEGGPRTLGGDGHRAEEASKDKE
CACGGCGTCTGGAATGCAGGATGAGGTCAGAGCGGTTGGCGAGGAGCAAAGGTCAGAGGAGCCAAAGCGCAGGGTGGATACTTCAGTGTCTTGGGAGGCGTTGATTTGTGTCGGATCGTCCAAGAAGAGAGCGAGGAAGG	CACGGCGTCTGGAATGCAGGATGAGGTCAGAGCGGTTGGCGAGGAGCAAAGGTCAGAGGAGCCAAAGCGCAGGGTGGATACTTCAGTGTCTTGGGAGGCGTTGATTTGTGTCGGATCGTCCAGGAAGAGAGCGAGGAAGG	5	WT	VKSATLSSTESTASGMQDEVRAVGEEQRSEEPKRRVDTSVSWEALICVGSSKKRARKASSSDDEGGPRTLGGDGHRAEEASKDKE	VKSATLSSTESTASGMQDEVRAVGEEQRSEEPKRRVDTSVSWEALICVGSSKKRARKASSSDDEGGPRTLGGDGHRAEEASKDKE
CACGGCGTCTGGAATGCAGGATGAGGTCAGAGCGGTTGGCGAGGAGCAAAGGTCAGAGGAGCCAAAGCGCAGGGTGGATACTTCAGTGTCTTGGGAGGCGTTGATTTGTGTCGGATCGTCCAAGAAGAGAGCGAGGAAGG	CACGGCGTCTGGAATGCAGGATGAGGTCAGAGCGGTTGGCGAGGAGCAAAGGTCAGAGGAGCCAAAGCGCAGGGTGGATACTTCAGTGTCTTGGGAGGCGTTGATTTGTGTCGGATCGTCCAAGAAGAGAACGAGGAAGG	5	WT	VKSATLSSTESTASGMQDEVRAVGEEQRSEEPKRRVDTSVSWEALICVGSSKKRARKASSSDDEGGPRTLGGDGHRAEEASKDKE	VKSATLSSTESTASGMQDEVRAVGEEQRSEEPKRRVDTSVSWEALICVGSSKKRARKASSSDDEGGPRTLGGDGHRAEEASKDKE
CACGGCGTCTGGAATGCAGGATGAGGTCAGAGCGGTTGGCGAGGAGCAAAGGTCAGAGGAGCCAAAGCGCAGGGTGGATACTTCAGTGTCTTGGGAGGCGTTGATTTGTGTCGGATCGTCCAAGAAGAGAGCGAGGAAGG	CACGGCGTCTGGAATGCAGGATGAGGTCAGAGCGGTTGGCGAGGAGCAAAGGTCAGAGGAGCCAAAGCGCAGGGTTGATACTTCAGTGTCTTGGGAGGCGTTGATTTGTGTCGGATCGTCCAAGAAGAGAGCGAGGAAGG	5	WT	VKSATLSSTESTASGMQDEVRAVGEEQRSEEPKRRVDTSVSWEALICVGSSKKRARKASSSDDEGGPRTLGGDGHRAEEASKDKE	VKSATLSSTESTASGMQDEVRAVGEEQRSEEPKRRVDTSVSWEALICVGSSKKRARKASSSDDEGGPRTLGGDGHRAEEASKDKE
CACGGCGTCTGGAATGCAGGATGAGGTCAGAGCGGTTGGCGAGGAGCAAAGGTCAGAGGAGCCAAAGCGCAGGGTGGATACTTCAGTGTCTTGGGAGGCGTTGATTTGTGTCGGATCGTCCAAGAAGAGAGCGAGGAAGG	CACGGTGTCTGGAATGCAGGATGAGGTCAGAGCGGTTGGCGAGGAGCAAAGGTCAGAGGAGCCAAAGCGCAGGGTGGATACTTCAGTGTCTTGGGAGGCGTTGATTTGTGTCGGATCGTCCAAGAAGAGAGCGAGGAAGG	5	WT	VKSATLSSTESTASGMQDEVRAVGEEQRSEEPKRRVDTSVSWEALICVGSSKKRARKASSSDDEGGPRTLGGDGHRAEEASKDKE	VKSATLSSTESTASGMQDEVRAVGEEQRSEEPKRRVDTSVSWEALICVGSSKKRARKASSSDDEGGPRTLGGDGHRAEEASKDKE
CACGGCGTCTGGAATGCAGGATGAGGTCAGAGCGGTTGGCGAGGAGCAAAGGTCAGAGGAGCCAAAGCGCAGGGTGGATACTTCAGTGTCTTGGGAGGCGTTGATTTGTGTCGGATCGTCCAAGAAGAGAGCGAGGAAGG	CACGGCGTCTGGAATGCAGGATGAGGTCAGAGCGGTTGGCAAGGAGCAAAGGTCAGAGGAGCCAAAGCGCAGGGTGGATACTTCAGTGTCTTGGGAGGCGTTGATTTGTGTCGGATCGTCCAAGAAGAGAGCGAGGAAGG	4	WT	VKSATLSSTESTASGMQDEVRAVGEEQRSEEPKRRVDTSVSWEALICVGSSKKRARKASSSDDEGGPRTLGGDGHRAEEASKDKE	VKSATLSSTESTASGMQDEVRAVGEEQRSEEPKRRVDTSVSWEALICVGSSKKRARKASSSDDEGGPRTLGGDGHRAEEASKDKE
CACGGCGTCTGGAATGCAGGATGAGGTCAGAGCGGTTGGCGAGGAGCAAAGGTCAGAGGAGCCAAAGCGCAGGGTGGATACTTCAGTGTCTTGGGAGGCGTTGATTTGTGTCGGATCGTCCAAGAAGAGAGCGAGGAAGG	CACGGCGTCTGGAATGCAGGATGAGGTCGGAGCGGTTGGCGAGGAGCAAAGGTCAGAGGAGCCAAAGCGCAGGGTGGATACTTCAGTGTCTTGGGAGGCGTTGATTTGTGTCGGATCGTCCAAGAAGAGAGCGAGGAAGG	4	WT	VKSATLSSTESTASGMQDEVRAVGEEQRSEEPKRRVDTSVSWEALICVGSSKKRARKASSSDDEGGPRTLGGDGHRAEEASKDKE	VKSATLSSTESTASGMQDEVRAVGEEQRSEEPKRRVDTSVSWEALICVGSSKKRARKASSSDDEGGPRTLGGDGHRAEEASKDKE
CACGGCGTCTGGAATGCAGGATGAGGTCAGAGCGGTTGGCGAGGAGCAAAGGTCAGAGGAGCCAAAGCGCAGGGTGGATACTTCAGTGTCTTGGGAGGCGTTGATTTGTGTCGGATCGTCCAAGAAGAGAGCGAGGAAGG	CACGGCGTCTGGAATGCAGGATGAGGTCAGAGTGGTTGGCGAGGAGCAAAGGTCAGAGGAGCCAAAGCGCAGGGTGGATACTTCAGTGTCTTGGGAGGCGTTGATTTGTGTCGGATCGTCCAAGAAGAGAGCGAGGAAGG	4	WT	VKSATLSSTESTASGMQDEVRAVGEEQRSEEPKRRVDTSVSWEALICVGSSKKRARKASSSDDEGGPRTLGGDGHRAEEASKDKE	VKSATLSSTESTASGMQDEVRAVGEEQRSEEPKRRVDTSVSWEALICVGSSKKRARKASSSDDEGGPRTLGGDGHRAEEASKDKE
CACGGCGTCTGGAATGCAGGATGAGGTCAGAGCGGTTGGCGAGGAGCAAAGGTCAGAGGAGCCAAAGCGCAGGGTGGATACTTCAGTGTCTTGGGAGGCGTTGATTTGTGTCGGATCGTCCAAGAAGAGAGCGAGGAAGG	CACGGCGTCTGGAATGCAGGATGAGGTCAGAGCGGTTGGCGAGGAGCAAAGGTCAGAGGAGCCAAAGCGCAGGGTGGACACTTCAGTGTCTTGGGAGGCGTTGATTTGTGTCGGATCGTCCAAGAAGAGAGCGAGGAAGG	4	WT	VKSATLSSTESTASGMQDEVRAVGEEQRSEEPKRRVDTSVSWEALICVGSSKKRARKASSSDDEGGPRTLGGDGHRAEEASKDKE	VKSATLSSTESTASGMQDEVRAVGEEQRSEEPKRRVDTSVSWEALICVGSSKKRARKASSSDDEGGPRTLGGDGHRAEEASKDKE
CACGGCGTCTGGAATGCAGGATGAGGTCAGAGCGGTTGGCGAGGAGCAAAGGTCAGAGGAGCCAAAGCGCAGGGTGGATACTTCAGTGTCTTGGGAGGCGTTGATTTGTGTCGGATCGTCCAAGAAGAGAGCGAGGAAGG	CACGGCGTCTGGAATGCAGGATGAGGTCAGAGCGGTTGGCGAGGAGCAAAGGTCAGAGGAGCCAAAGCGCAGGGTGGATACTTCAGTGTCTTGGGAGGCGTTGATTTGTGTCGGATCGTCCAAGAGGAGAGCGAGGAAGG	4	WT	VKSATLSSTESTASGMQDEVRAVGEEQRSEEPKRRVDTSVSWEALICVGSSKKRARKASSSDDEGGPRTLGGDGHRAEEASKDKE	VKSATLSSTESTASGMQDEVRAVGEEQRSEEPKRRVDTSVSWEALICVGSSKKRARKASSSDDEGGPRTLGGDGHRAEEASKDKE
CACGGCGTCTGGAATGCAGGATGAGGTCAGAGCGGTTGGCGAGGAGCAAAGGTCAGAGGAGCCAAAGCGCAGGGTGGATACTTCAGTGTCTTGGGAGGCGTTGATTTGTGTCGGATCGTCCAAGAAGAGAGCGAGGAAGG	CACGGCGTCTGGAATGCAGAATGAGGTCAGAGCGGTTGGCGAGGAGCAAAGGTCAGAGGAGCCAAAGCGCCGGGTGGATACTTCAGTGTCTTGGGAGGCGTTGATTTGTGTCGGATCGTCCAAGAAGAGAGCGAGGAAGG	4	WT	VKSATLSSTESTASGMQDEVRAVGEEQRSEEPKRRVDTSVSWEALICVGSSKKRARKASSSDDEGGPRTLGGDGHRAEEASKDKE	VKSATLSSTESTASGMQDEVRAVGEEQRSEEPKRRVDTSVSWEALICVGSSKKRARKASSSDDEGGPRTLGGDGHRAEEASKDKE
CACGGCGTCTGGAATGCAGGATGAGGTCAGAGCGGTTGGCGAGGAGCAAAGGTCAGAGGAGCCAAAGCGCAGGGTGGATACTTCAGTGTCTTGGGAGGCGTTGATTTGTGTCGGATCGTCCAAGAAGAGAGCGAGGAAGG	CACGACGTCTGGAATGCAGGATGAGGTCAGAGCGGTTGGCGAGGAGCAAAGGTCAGAGGAGCCAAAGCGCAGGGTGGATACTTCAGTGTCTTGGGAGGCGTTGATTTGTGTCGGATCGTCCAAGAAGAGAGCGAGGAAGG	4	WT	VKSATLSSTESTASGMQDEVRAVGEEQRSEEPKRRVDTSVSWEALICVGSSKKRARKASSSDDEGGPRTLGGDGHRAEEASKDKE	VKSATLSSTESTASGMQDEVRAVGEEQRSEEPKRRVDTSVSWEALICVGSSKKRARKASSSDDEGGPRTLGGDGHRAEEASKDKE
CACGGCGTCTGGAATGCAGGATGAGGTCAGAGCGGTTGGCGAGGAGCAAAGGTCAGAGGAGCCAAAGCGCAGGGTGGATACTTCAGTGTCTTGGGAGGCGTTGATTTGTGTCGGATCGTCCAAGAAGAGAGCGAGGAAGG	CACGGCGTCTGGAATGCAGGATGAGGTCAGAGCGGTTGGCGAGGAGCAAAGGTCAGAGGAGCCAAAGCGCAGGGTGGATACTTCAGTGTCTTGGGAAGCGTTGATTTGTGTCGGATCGTCCAAGAAGAGAGCGAGGAAGG	4	WT	VKSATLSSTESTASGMQDEVRAVGEEQRSEEPKRRVDTSVSWEALICVGSSKKRARKASSSDDEGGPRTLGGDGHRAEEASKDKE	VKSATLSSTESTASGMQDEVRAVGEEQRSEEPKRRVDTSVSWEALICVGSSKKRARKASSSDDEGGPRTLGGDGHRAEEASKDKE
CACGGCGTCTGGAATGCAGGATGAGGTCAGAGCGGTTGGCGAGGAGCAAAGGTCAGAGGAGCCAAAGCGCAGGGTGGATACTTCAGTGTCTTGGGAGGCGTTGATTTGTGTCGGATCGTCCAAGAAGAGAGCGAGGAAGG	CACGGCGTCTGGAATGCAGGATGAGGTCAGAGCGGTTGGCGAGGAGTAAAGGTCAGAGGAGCCAAAGCGCAGGGTGGATACTTCAGTGTCTTGGGAGGCGTTGATTTGTGTCGGATCGTCCAAGAAGAGAGCGAGGAAGG	4	WT	VKSATLSSTESTASGMQDEVRAVGEEQRSEEPKRRVDTSVSWEALICVGSSKKRARKASSSDDEGGPRTLGGDGHRAEEASKDKE	VKSATLSSTESTASGMQDEVRAVGEEQRSEEPKRRVDTSVSWEALICVGSSKKRARKASSSDDEGGPRTLGGDGHRAEEASKDKE
CACGGCGTCTGGAATGCAGGATGAGGTCAGAGCGGTTGGCGAGGAGCAAAGGTCAGAGGAGCCAAAGCGCAGGGTGGATACTTCAGTGTCTTGGGAGGCGTTGATTTGTGTCGGATCGTCCAAGAAGAGAGCGAGGAAGG	CACGGCGTCTGGAATGCAGGATGAGGTCAGAGCGGTTGGCGAGGAGCAAAGGTCAGAGGAGCCAAAGCGCAGGGTGGATACTTCAGTGTCTTGGGAGGCGTTGATTTGTGTCGAATCGTCCAAGAAGAGAGCGAGGAAGG	4	WT	VKSATLSSTESTASGMQDEVRAVGEEQRSEEPKRRVDTSVSWEALICVGSSKKRARKASSSDDEGGPRTLGGDGHRAEEASKDKE	VKSATLSSTESTASGMQDEVRAVGEEQRSEEPKRRVDTSVSWEALICVGSSKKRARKASSSDDEGGPRTLGGDGHRAEEASKDKE
CACGGCGTCTGGAATGCAGGATGAGGTCAGAGCGGTTGGCGAGGAGCAAAGGTCAGAGGAGCCAAAGCGCAGGGTGGATACTTCAGTGTCTTGGGAGGCGTTGATTTGTGTCGGATCGTCCAAGAAGAGAGCGAGGAAGG	CACGGCGTCTGGAATGCAGGATGAGGTCAGAGCGGTTGGCGAGGAGCAAAGGTCAGAGGAGACAAAGCGCAGGGTGGATACTTCAGTGTCTTGGGAGGCGTTGATTTGTGTCGGATCGTCCAAGAAGAGAGCGAGGAAGG	3	WT	VKSATLSSTESTASGMQDEVRAVGEEQRSEEPKRRVDTSVSWEALICVGSSKKRARKASSSDDEGGPRTLGGDGHRAEEASKDKE	VKSATLSSTESTASGMQDEVRAVGEEQRSEEPKRRVDTSVSWEALICVGSSKKRARKASSSDDEGGPRTLGGDGHRAEEASKDKE
CACGGCGTCTGGAATGCAGGATGAGGTCAGAGCGGTTGGCGAGGAGCAAAGGTCAGAGGAGCCAAAGCGCAGGGTGGATACTTCAGTGTCTTGGGAGGCGTTGATTTGTGTCGGATCGTCCAAGAAGAGAGCGAGGAAGG	CACGGCGTCTGGAATGCAGGATGAGGTCAGAGCGGTTGGCGAGGAGCAAAGGTCAGAGGAGCCAAAGCGCAGGGTGGATACTTCAGTGTCTTGGGAGGCGTTGATTTGTGTCGGATCGTCCAAGAAGAGAGGGAGGAAGG	3	WT	VKSATLSSTESTASGMQDEVRAVGEEQRSEEPKRRVDTSVSWEALICVGSSKKRARKASSSDDEGGPRTLGGDGHRAEEASKDKE	VKSATLSSTESTASGMQDEVRAVGEEQRSEEPKRRVDTSVSWEALICVGSSKKRARKASSSDDEGGPRTLGGDGHRAEEASKDKE
CACGGCGTCTGGAATGCAGGATGAGGTCAGAGCGGTTGGCGAGGAGCAAAGGTCAGAGGAGCCAAAGCGCAGGGTGGATACTTCAGTGTCTTGGGAGGCGTTGATTTGTGTCGGATCGTCCAAGAAGAGAGCGAGGAAGG	CACAGCGTCTGGAATGCAGGATGAGGTCAGAGCGGTTGGCGAGGAGCAAAGGTCAGAGGAGCCAAAGCGCAGGGTGGATACTTCAGTGTCTTGGGAGGCGTTGATTTGTGTCGGATCGTCCAAGAAGAGAGCGAGGAAGG	3	WT	VKSATLSSTESTASGMQDEVRAVGEEQRSEEPKRRVDTSVSWEALICVGSSKKRARKASSSDDEGGPRTLGGDGHRAEEASKDKE	VKSATLSSTESTASGMQDEVRAVGEEQRSEEPKRRVDTSVSWEALICVGSSKKRARKASSSDDEGGPRTLGGDGHRAEEASKDKE
CACGGCGTCTGGAATGCAGGATGAGGTCAGAGCGGTTGGCGAGGAGCAAAGGTCAGAGGAGCCAAAGCGCAGGGTGGATACTTCAGTGTCTTGGGAGGCGTTGATTTGTGTCGGATCGTCCAAGAAGAGAGCGAGGAAGG	CACGGCGTCTGGAATGCAGGATGAGGTCAGAGCGGTTGGCGAGGAGCAAAGGTCAGAGGAGCCAAAGCGCAGGGTGGATACTTCAGTGTCTTGGGAGGCGTTGATTTGTGTCGGATCGTCCAAGAAGAGAGCGAGGAAGT	3	WT	VKSATLSSTESTASGMQDEVRAVGEEQRSEEPKRRVDTSVSWEALICVGSSKKRARKASSSDDEGGPRTLGGDGHRAEEASKDKE	VKSATLSSTESTASGMQDEVRAVGEEQRSEEPKRRVDTSVSWEALICVGSSKKRARKASSSDDEGGPRTLGGDGHRAEEASKDKE
CACGGCGTCTGGAATGCAGGATGAGGTCAGAGCGGTTGGCGAGGAGCAAAGGTCAGAGGAGCCAAAGCGCAGGGTGGATACTTCAGTGTCTTGGGAGGCGTTGATTTGTGTCGGATCGTCCAAGAAGAGAGCGAGGAAGG	CACGGCGTCTGGAATGCAGGATGAGGTCAGAGCGGTTGGCGAGGAGCAAAGGTCAGAGGAGCCAAAGCGCAGGGTGGATACTTCAGTGTCTTGGGAGGCGTTGATTTGTGTCGGATCGTCCAAGAAGAGAGCGAGGATGG	3	WT	VKSATLSSTESTASGMQDEVRAVGEEQRSEEPKRRVDTSVSWEALICVGSSKKRARKASSSDDEGGPRTLGGDGHRAEEASKDKE	VKSATLSSTESTASGMQDEVRAVGEEQRSEEPKRRVDTSVSWEALICVGSSKKRARKASSSDDEGGPRTLGGDGHRAEEASKDKE
CACGGCGTCTGGAATGCAGGATGAGGTCAGAGCGGTTGGCGAGGAGCAAAGGTCAGAGGAGCCAAAGCGCAGGGTGGATACTTCAGTGTCTTGGGAGGCGTTGATTTGTGTCGGATCGTCCAAGAAGAGAGCGAGGAAGG	CACGGCGTCTGGAATGCAGGATGAGGTCAGAGCGATTGGCGAGGAGCAAAGGTCAGAGGAGCCAAAGCGCAGGGTGGATACTTCAGTGTCTTGGGAGGCGTTGATTTGTGTCGGATCGTCCAAGAAGAGAGCGAGGAAGG	3	WT	VKSATLSSTESTASGMQDEVRAVGEEQRSEEPKRRVDTSVSWEALICVGSSKKRARKASSSDDEGGPRTLGGDGHRAEEASKDKE	VKSATLSSTESTASGMQDEVRAVGEEQRSEEPKRRVDTSVSWEALICVGSSKKRARKASSSDDEGGPRTLGGDGHRAEEASKDKE
CACGGCGTCTGGAATGCAGGATGAGGTCAGAGCGGTTGGCGAGGAGCAAAGGTCAGAGGAGCCAAAGCGCAGGGTGGATACTTCAGTGTCTTGGGAGGCGTTGATTTGTGTCGGATCGTCCAAGAAGAGAGCGAGGAAGG	CATGGCGTCTGGAATGCAGGATGAGGTCAGAGCGGTTGGCGAGGAGCAAAGGTCAGAGGAGCCAAAGCGCAGGGTGGATACTTCAGTGTCTTGGGAGGCGTTGATTTGTGTCGGATCGTCCAAGAAGAGAGCGAGGAAGG	3	WT	VKSATLSSTESTASGMQDEVRAVGEEQRSEEPKRRVDTSVSWEALICVGSSKKRARKASSSDDEGGPRTLGGDGHRAEEASKDKE	VKSATLSSTESTASGMQDEVRAVGEEQRSEEPKRRVDTSVSWEALICVGSSKKRARKASSSDDEGGPRTLGGDGHRAEEASKDKE
CACGGCGTCTGGAATGCAGGATGAGGTCAGAGCGGTTGGCGAGGAGCAAAGGTCAGAGGAGCCAAAGCGCAGGGTGGATACTTCAGTGTCTTGGGAGGCGTTGATTTGTGTCGGATCGTCCAAGAAGAGAGCGAGGAAGG	CACGGCGTCTAGAATGCAGGATGAGGTCAGAGCGGTTGGCGAGGAGCAAAGGTCAGAGGAGCCAAAGCGCAGGGTGGATACTTCAGTGTCTTGGGAGGCGTTGATTTGTGTCGGATCGTCCAAGAAGAGAGCGAGGAAGG	3	WT	VKSATLSSTESTASGMQDEVRAVGEEQRSEEPKRRVDTSVSWEALICVGSSKKRARKASSSDDEGGPRTLGGDGHRAEEASKDKE	VKSATLSSTESTASGMQDEVRAVGEEQRSEEPKRRVDTSVSWEALICVGSSKKRARKASSSDDEGGPRTLGGDGHRAEEASKDKE
CACGGCGTCTGGAATGCAGGATGAGGTCAGAGCGGTTGGCGAGGAGCAAAGGTCAGAGGAGCCAAAGCGCAGGGTGGATACTTCAGTGTCTTGGGAGGCGTTGATTTGTGTCGGATCGTCCAAGAAGAGAGCGAGGAAGG	CACGGCGTCTGTAATGCAGGATGAGGTCAGAGCGGTTGGCGAGGAGCAAAGGTCAGAGGAGCCAAAGCGCAGGGTGGATACTTCAGTGTCTTGGGAGGCGTTGATTTGTGTCGGATCGTCCAAGAAGAGAGCGAGGAAGG	3	WT	VKSATLSSTESTASGMQDEVRAVGEEQRSEEPKRRVDTSVSWEALICVGSSKKRARKASSSDDEGGPRTLGGDGHRAEEASKDKE	VKSATLSSTESTASGMQDEVRAVGEEQRSEEPKRRVDTSVSWEALICVGSSKKRARKASSSDDEGGPRTLGGDGHRAEEASKDKE
CACGGCGTCTGGAATGCAGGATGAGGTCAGAGCGGTTGGCGAGGAGCAAAGGTCAGAGGAGCCAAAGCGCAGGGTGGATACTTCAGTGTCTTGGGAGGCGTTGATTTGTGTCGGATCGTCCAAGAAGAGAGCGAGGAAGG	CACGGCGTCTGGAATGCAGGATGAGGTCAGAGCGGTTGGCGAGGAGCAAAGGTCAGAGGAGCCAAAGCGCAGGGTGGATACTTCAGTGTCTTGGGAGGCGTTGATTTGTGTCTGATCGTCCAAGAAGAGAGCGAGGAAGG	3	WT	VKSATLSSTESTASGMQDEVRAVGEEQRSEEPKRRVDTSVSWEALICVGSSKKRARKASSSDDEGGPRTLGGDGHRAEEASKDKE	VKSATLSSTESTASGMQDEVRAVGEEQRSEEPKRRVDTSVSWEALICVGSSKKRARKASSSDDEGGPRTLGGDGHRAEEASKDKE
CACGGCGTCTGGAATGCAGGATGAGGTCAGAGCGGTTGGCGAGGAGCAAAGGTCAGAGGAGCCAAAGCGCAGGGTGGATACTTCAGTGTCTTGGGAGGCGTTGATTTGTGTCGGATCGTCCAAGAAGAGAGCGAGGAAGG	CACGGCGTCTGGAATGCAGGATGAGGTCAGAGCGGTTGGCGAGGAGCAAAGGTCAGAGGAGCCAAAGCGCAGGGTGAATACTTCAGTGTCTTGGGAGGCGTTGATTTGTGTCGGATCGTCCAAGAAGAGAGCGAGGAAGG	3	WT	VKSATLSSTESTASGMQDEVRAVGEEQRSEEPKRRVDTSVSWEALICVGSSKKRARKASSSDDEGGPRTLGGDGHRAEEASKDKE	VKSATLSSTESTASGMQDEVRAVGEEQRSEEPKRRVDTSVSWEALICVGSSKKRARKASSSDDEGGPRTLGGDGHRAEEASKDKE
CACGGCGTCTGGAATGCAGGATGAGGTCAGAGCGGTTGGCGAGGAGCAAAGGTCAGAGGAGCCAAAGCGCAGGGTGGATACTTCAGTGTCTTGGGAGGCGTTGATTTGTGTCGGATCGTCCAAGAAGAGAGCGAGGAAGG	CACGGCGTCTGGAATGCAGGACGAGGTCAGAGCGGTTGGCGAGGAGCAAAGGTCAGAGGAGCCAAAGCGCAGGGTGGATACTTCAGTGTCTTGGGAGGCGTTGATTTGTGTCGGATCGTCCAAGAAGAGAGCGAGGAAGG	3	WT	VKSATLSSTESTASGMQDEVRAVGEEQRSEEPKRRVDTSVSWEALICVGSSKKRARKASSSDDEGGPRTLGGDGHRAEEASKDKE	VKSATLSSTESTASGMQDEVRAVGEEQRSEEPKRRVDTSVSWEALICVGSSKKRARKASSSDDEGGPRTLGGDGHRAEEASKDKE
CACGGCGTCTGGAATGCAGGATGAGGTCAGAGCGGTTGGCGAGGAGCAAAGGTCAGAGGAGCCAAAGCGCAGGGTGGATACTTCAGTGTCTTGGGAGGCGTTGATTTGTGTCGGATCGTCCAAGAAGAGAGCGAGGAAGG	CACGGCGTCTGGAATGCAGGATGAGGTCAGAGCGGTTGGCGAGGAGCAAAGGTCAGAGGAGCCAAAGCGCAGGGTGGATACTTCAGTGTCTTGGGAGGCGTTGATTTGTGTCAGATCGTCCAAGAAGAGAGCGAGGAAGG	3	WT	VKSATLSSTESTASGMQDEVRAVGEEQRSEEPKRRVDTSVSWEALICVGSSKKRARKASSSDDEGGPRTLGGDGHRAEEASKDKE	VKSATLSSTESTASGMQDEVRAVGEEQRSEEPKRRVDTSVSWEALICVGSSKKRARKASSSDDEGGPRTLGGDGHRAEEASKDKE
CACGGCGTCTGGAATGCAGGATGAGGTCAGAGCGGTTGGCGAGGAGCAAAGGTCAGAGGAGCCAAAGCGCAGGGTGGATACTTCAGTGTCTTGGGAGGCGTTGATTTGTGTCGGATCGTCCAAGAAGAGAGCGAGGAAGG	CACGGCGTCTGGAATGCAGGATGAGGTCAGAGCGGTTGGCGAGGAGCAAAGGTCAGAGGAGCCAAAGCGCAGGGTGGATACTTCAGTGTCTTGGGAGGCGTTGATTTGTGTTGGATCGTCCAAGAAGAGAGCGAGGAAGG	3	WT	VKSATLSSTESTASGMQDEVRAVGEEQRSEEPKRRVDTSVSWEALICVGSSKKRARKASSSDDEGGPRTLGGDGHRAEEASKDKE	VKSATLSSTESTASGMQDEVRAVGEEQRSEEPKRRVDTSVSWEALICVGSSKKRARKASSSDDEGGPRTLGGDGHRAEEASKDKE
CACGGCGTCTGGAATGCAGGATGAGGTCAGAGCGGTTGGCGAGGAGCAAAGGTCAGAGGAGCCAAAGCGCAGGGTGGATACTTCAGTGTCTTGGGAGGCGTTGATTTGTGTCGGATCGTCCAAGAAGAGAGCGAGGAAGG	CACGGCGTCTGGAATGCAGGATGAGGTCAGAGCGGTTGGCGAGGAGCAAAGGTCAGAGGAGCCGAAGCGCAGGGTGGATACTTCAGTGTCTTGGGAGGCGTTGATTTGTGTCGGATCGTCCAAGAAGAGAGCGAGGAAGG	3	WT	VKSATLSSTESTASGMQDEVRAVGEEQRSEEPKRRVDTSVSWEALICVGSSKKRARKASSSDDEGGPRTLGGDGHRAEEASKDKE	VKSATLSSTESTASGMQDEVRAVGEEQRSEEPKRRVDTSVSWEALICVGSSKKRARKASSSDDEGGPRTLGGDGHRAEEASKDKE
CACGGCGTCTGGAATGCAGGATGAGGTCAGAGCGGTTGGCGAGGAGCAAAGGTCAGAGGAGCCAAAGCGCAGGGTGGATACTTCAGTGTCTTGGGAGGCGTTGATTTGTGTCGGATCGTCCAAGAAGAGAGCGAGGAAGG	CACGGCGTCTGGAATGCAGGATGAGGTCAGAGCGGTTGGCGAGGAGCAAAGGTTAGAGGAGCCAAAGCGCAGGGTGGATACTTCAGTGTCTTGGGAGGCGTTGATTTGTGTCGGATCGTCCAAGAAGAGAGCGAGGAAGG	3	WT	VKSATLSSTESTASGMQDEVRAVGEEQRSEEPKRRVDTSVSWEALICVGSSKKRARKASSSDDEGGPRTLGGDGHRAEEASKDKE	VKSATLSSTESTASGMQDEVRAVGEEQRSEEPKRRVDTSVSWEALICVGSSKKRARKASSSDDEGGPRTLGGDGHRAEEASKDKE
CACGGCGTCTGGAATGCAGGATGAGGTCAGAGCGGTTGGCGAGGAGCAAAGGTCAGAGGAGCCAAAGCGCAGGGTGGATACTTCAGTGTCTTGGGAGGCGTTGATTTGTGTCGGATCGTCCAAGAAGAGAGCGAGGAAGG	CACGGCGTCTGGAATGCAGGATGAGGTCAGAGCGGTTGGCGAGGAGCAAAGGTCAGAGTAGCCAAAGCGCAGGGTGGATACTTCAGTGTCTTGGGAGGCGTTGATTTGTGTCGGATCGTCCAAGAAGAGAGCGAGGAAGG	3	WT	VKSATLSSTESTASGMQDEVRAVGEEQRSEEPKRRVDTSVSWEALICVGSSKKRARKASSSDDEGGPRTLGGDGHRAEEASKDKE	VKSATLSSTESTASGMQDEVRAVGEEQRSEEPKRRVDTSVSWEALICVGSSKKRARKASSSDDEGGPRTLGGDGHRAEEASKDKE
CACGGCGTCTGGAATGCAGGATGAGGTCAGAGCGGTTGGCGAGGAGCAAAGGTCAGAGGAGCCAAAGCGCAGGGTGGATACTTCAGTGTCTTGGGAGGCGTTGATTTGTGTCGGATCGTCCAAGAAGAGAGCGAGGAAGG	CACGGCGTCTGGAATGCAGGATGAGGTCAGAGCGGTTGGCGAAGAGCAAAGGTCAGAGGAGCCAAAGCGCAGGGTGGATACTTCAGTGTCTTGGGAGGCGTTGATTTGTGTCGGATCGTCCAAGAAGAGAGCGAGGAAGG	3	WT	VKSATLSSTESTASGMQDEVRAVGEEQRSEEPKRRVDTSVSWEALICVGSSKKRARKASSSDDEGGPRTLGGDGHRAEEASKDKE	VKSATLSSTESTASGMQDEVRAVGEEQRSEEPKRRVDTSVSWEALICVGSSKKRARKASSSDDEGGPRTLGGDGHRAEEASKDKE
CACGGCGTCTGGAATGCAGGATGAGGTCAGAGCGGTTGGCGAGGAGCAAAGGTCAGAGGAGCCAAAGCGCAGGGTGGATACTTCAGTGTCTTGGGAGGCGTTGATTTGTGTCGGATCGTCCAAGAAGAGAGCGAGGAAGG	CTCGGCGTCTGGAATGCAGGATGAGGTCAGAGCGGTTGGCGAGGAGCAAAGGTCAGAGGAGCCAAAGCGCAGGGTGGATACTTCAGTGTCTTGGGAGGCGTTGATTTGTGTCGGATCGTCCAAGAAGAGAGCGAGGAAGG	3	WT	VKSATLSSTESTASGMQDEVRAVGEEQRSEEPKRRVDTSVSWEALICVGSSKKRARKASSSDDEGGPRTLGGDGHRAEEASKDKE	VKSATLSSTESTASGMQDEVRAVGEEQRSEEPKRRVDTSVSWEALICVGSSKKRARKASSSDDEGGPRTLGGDGHRAEEASKDKE
CACGGCGTCTGGAATGCAGGATGAGGTCAGAGCGGTTGGCGAGGAGCAAAGGTCAGAGGAGCCAAAGCGCAGGGTGGATACTTCAGTGTCTTGGGAGGCGTTGATTTGTGTCGGATCGTCCAAGAAGAGAGCGAGGAAGG	CACGGCGTCTGGAATGCAGGATGAGGTCAGAGCTGTTGGCGAGGAGCAAAGGTCAGAGGAGCCAAAGCGCAGGGTGGATACTTCAGTGTCTTGGGAGGCGTTGATTTGTGTCGGATCGTCCAAGAAGAGAGCGAGGAAGG	3	WT	VKSATLSSTESTASGMQDEVRAVGEEQRSEEPKRRVDTSVSWEALICVGSSKKRARKASSSDDEGGPRTLGGDGHRAEEASKDKE	VKSATLSSTESTASGMQDEVRAVGEEQRSEEPKRRVDTSVSWEALICVGSSKKRARKASSSDDEGGPRTLGGDGHRAEEASKDKE
CACGGCGTCTGGAATGCAGGATGAGGTCAGAGCGGTTGGCGAGGAGCAAAGGTCAGAGGAGCCAAAGCGCAGGGTGGATACTTCAGTGTCTTGGGAGGCGTTGATTTGTGTCGGATCGTCCAAGAAGAGAGCGAGGAAGG	CACGGCGTCTGGAATGCAGGATGAGGTCAGAGCGGTTGGCGAGGAGCAAAGGTCAGAGGAGCCAAAGCGCAGAGTGGATACTTCAGTGTCTTGGGAGGCGTTGATTTGTGTCGGATCGTCCAAGAAGAGAGCGAGGAAGG	3	WT	VKSATLSSTESTASGMQDEVRAVGEEQRSEEPKRRVDTSVSWEALICVGSSKKRARKASSSDDEGGPRTLGGDGHRAEEASKDKE	VKSATLSSTESTASGMQDEVRAVGEEQRSEEPKRRVDTSVSWEALICVGSSKKRARKASSSDDEGGPRTLGGDGHRAEEASKDKE
CACGGCGTCTGGAATGCAGGATGAGGTCAGAGCGGTTGGCGAGGAGCAAAGGTCAGAGGAGCCAAAGCGCAGGGTGGATACTTCAGTGTCTTGGGAGGCGTTGATTTGTGTCGGATCGTCCAAGAAGAGAGCGAGGAAGG	CACGGCGTCTGGAATGCAGGATGAGGTCAGAGCGGTTGGCGAGGAGCAAAGGTCAGAGGAGCCAAAGCGCAGGGTGGATACTTCAGTGTCTTGGGAGGCGTTGAGTTGTGTCGGATCGTCCAAGAAGAGAGCGAGGAAGG	2	WT	VKSATLSSTESTASGMQDEVRAVGEEQRSEEPKRRVDTSVSWEALICVGSSKKRARKASSSDDEGGPRTLGGDGHRAEEASKDKE	VKSATLSSTESTASGMQDEVRAVGEEQRSEEPKRRVDTSVSWEALICVGSSKKRARKASSSDDEGGPRTLGGDGHRAEEASKDKE
CACGGCGTCTGGAATGCAGGATGAGGTCAGAGCGGTTGGCGAGGAGCAAAGGTCAGAGGAGCCAAAGCGCAGGGTGGATACTTCAGTGTCTTGGGAGGCGTTGATTTGTGTCGGATCGTCCAAGAAGAGAGCGAGGAAGG	CACGGCGTCTGGAATGCAGGATGAGGTCAGAGCGGTTGGCGAGGAGCAAAGGTCAGAGGAGCCAAAGCGCAGGGTGGATACTTCAGTGTCTTGGGAGGCGTTGATTTGTGTCGGATCGTCCAAGAAGAGAGCGCGGAAGG	2	WT	VKSATLSSTESTASGMQDEVRAVGEEQRSEEPKRRVDTSVSWEALICVGSSKKRARKASSSDDEGGPRTLGGDGHRAEEASKDKE	VKSATLSSTESTASGMQDEVRAVGEEQRSEEPKRRVDTSVSWEALICVGSSKKRARKASSSDDEGGPRTLGGDGHRAEEASKDKE
CACGGCGTCTGGAATGCAGGATGAGGTCAGAGCGGTTGGCGAGGAGCAAAGGTCAGAGGAGCCAAAGCGCAGGGTGGATACTTCAGTGTCTTGGGAGGCGTTGATTTGTGTCGGATCGTCCAAGAAGAGAGCGAGGAAGG	CACGGCGTCTGGAATGCAGGATGAGGTCAGAGCGGTTGGCGAGGAGCAAAGGTCAGAGGAGCCAAAGCGCAGGGTGGATACTTCAGTGTCTTGGGAGGCGTTGATTTGTGTCGGCTCGTCCAAGAAGAGAGCGAGGAAGG	2	WT	VKSATLSSTESTASGMQDEVRAVGEEQRSEEPKRRVDTSVSWEALICVGSSKKRARKASSSDDEGGPRTLGGDGHRAEEASKDKE	VKSATLSSTESTASGMQDEVRAVGEEQRSEEPKRRVDTSVSWEALICVGSSKKRARKASSSDDEGGPRTLGGDGHRAEEASKDKE
CACGGCGTCTGGAATGCAGGATGAGGTCAGAGCGGTTGGCGAGGAGCAAAGGTCAGAGGAGCCAAAGCGCAGGGTGGATACTTCAGTGTCTTGGGAGGCGTTGATTTGTGTCGGATCGTCCAAGAAGAGAGCGAGGAAGG	CACGGCGTCTTGAATGCAGGATGAGGTCAGAGCGGTTGGCGAGGAGCAAAGGTCAGAGGAGCCAAAGCGCAGGGTGGATACTTCAGTGTCTTGGGAGGCGTTGATTTGTGTCGGATCGTCCAAGAAGAGAGCGAGGAAGG	2	WT	VKSATLSSTESTASGMQDEVRAVGEEQRSEEPKRRVDTSVSWEALICVGSSKKRARKASSSDDEGGPRTLGGDGHRAEEASKDKE	VKSATLSSTESTASGMQDEVRAVGEEQRSEEPKRRVDTSVSWEALICVGSSKKRARKASSSDDEGGPRTLGGDGHRAEEASKDKE
CACGGCGTCTGGAATGCAGGATGAGGTCAGAGCGGTTGGCGAGGAGCAAAGGTCAGAGGAGCCAAAGCGCAGGGTGGATACTTCAGTGTCTTGGGAGGCGTTGATTTGTGTCGGATCGTCCAAGAAGAGAGCGAGGAAGG	CACGGAGTCTGGAATGCAGGATGAGGTCAGAGCGGTTGGCGAGGAGCAAAGGTCAGAGGAGCCAAAGCGCAGGGTGGATACTTCAGTGTCTTGGGAGGCGTTGATTTGTGTCGGATCGTCCAAGAAGAGAGCGAGGAAGG	2	WT	VKSATLSSTESTASGMQDEVRAVGEEQRSEEPKRRVDTSVSWEALICVGSSKKRARKASSSDDEGGPRTLGGDGHRAEEASKDKE	VKSATLSSTESTASGMQDEVRAVGEEQRSEEPKRRVDTSVSWEALICVGSSKKRARKASSSDDEGGPRTLGGDGHRAEEASKDKE
CACGGCGTCTGGAATGCAGGATGAGGTCAGAGCGGTTGGCGAGGAGCAAAGGTCAGAGGAGCCAAAGCGCAGGGTGGATACTTCAGTGTCTTGGGAGGCGTTGATTTGTGTCGGATCGTCCAAGAAGAGAGCGAGGAAGG	CACGGCGTCTGGAATGCAGGATGAGGTCAGAGCGGTTGGCGAGGAGCAAAGGTCAGGGGAGCCAAAGCGCAGGGTGGATACTTCAGTGTCTTGGGAGGCGTTGATTTGTGTCGGATCGTCCAAGAAGAGAGCGAGGAAGG	2	WT	VKSATLSSTESTASGMQDEVRAVGEEQRSEEPKRRVDTSVSWEALICVGSSKKRARKASSSDDEGGPRTLGGDGHRAEEASKDKE	VKSATLSSTESTASGMQDEVRAVGEEQRSEEPKRRVDTSVSWEALICVGSSKKRARKASSSDDEGGPRTLGGDGHRAEEASKDKE
CACGGCGTCTGGAATGCAGGATGAGGTCAGAGCGGTTGGCGAGGAGCAAAGGTCAGAGGAGCCAAAGCGCAGGGTGGATACTTCAGTGTCTTGGGAGGCGTTGATTTGTGTCGGATCGTCCAAGAAGAGAGCGAGGAAGG	CACGGCGTCTGGAATGCAGGATGAGGTTAGAGCGGTTGGCGAGGAGCAAAGGTCAGAGGAGCCAAAGCGCAGGGTGGATACTTCAGTGTCTTGGGAGGCGTTGATTTGTGTCGGATCGTCCAAGAAGAGAGCGAGGAAGG	2	WT	VKSATLSSTESTASGMQDEVRAVGEEQRSEEPKRRVDTSVSWEALICVGSSKKRARKASSSDDEGGPRTLGGDGHRAEEASKDKE	VKSATLSSTESTASGMQDEVRAVGEEQRSEEPKRRVDTSVSWEALICVGSSKKRARKASSSDDEGGPRTLGGDGHRAEEASKDKE
CACGGCGTCTGGAATGCAGGATGAGGTCAGAGCGGTTGGCGAGGAGCAAAGGTCAGAGGAGCCAAAGCGCAGGGTGGATACTTCAGTGTCTTGGGAGGCGTTGATTTGTGTCGGATCGTCCAAGAAGAGAGCGAGGAAGG	CACGGCGTCTGGAATGCAGGATGAGGTCAGAGCGGTTGGCGAGGAGCAAAGGTCAGAGGAGCCAAAGCGCAGGGTGGATACTTCAGTGTCTTGTGAGGCGTTGATTTGTGTCGGATCGTCCAAGAAGAGAGCGAGGAAGG	2	WT	VKSATLSSTESTASGMQDEVRAVGEEQRSEEPKRRVDTSVSWEALICVGSSKKRARKASSSDDEGGPRTLGGDGHRAEEASKDKE	VKSATLSSTESTASGMQDEVRAVGEEQRSEEPKRRVDTSVSWEALICVGSSKKRARKASSSDDEGGPRTLGGDGHRAEEASKDKE
CACGGCGTCTGGAATGCAGGATGAGGTCAGAGCGGTTGGCGAGGAGCAAAGGTCAGAGGAGCCAAAGCGCAGGGTGGATACTTCAGTGTCTTGGGAGGCGTTGATTTGTGTCGGATCGTCCAAGAAGAGAGCGAGGAAGG	CACGGCGTCTGGAATGCAGGATGAGGTCAGAGCGGTTGGCGAGGAGCAAAGGTCATAGGAGCCAAAGCGCAGGGTGGATACTTCAGTGTCTTGGGAGGCGTTGATTTGTGTCGGATCGTCCAAGAAGAGAGCGAGGAAGG	2	WT	VKSATLSSTESTASGMQDEVRAVGEEQRSEEPKRRVDTSVSWEALICVGSSKKRARKASSSDDEGGPRTLGGDGHRAEEASKDKE	VKSATLSSTESTASGMQDEVRAVGEEQRSEEPKRRVDTSVSWEALICVGSSKKRARKASSSDDEGGPRTLGGDGHRAEEASKDKE
CACGGCGTCTGGAATGCAGGATGAGGTCAGAGCGGTTGGCGAGGAGCAAAGGTCAGAGGAGCCAAAGCGCAGGGTGGATACTTCAGTGTCTTGGGAGGCGTTGATTTGTGTCGGATCGTCCAAGAAGAGAGCGAGGAAGG	CACGGCGTCTGGAATGCAGGATGAGGTCAGAGCGGTTGGCGAGGAGCAAAGGTCAGAGGAGCCAAAGCGCAAGGTGGATACTTCAGTGTCTTGGGAGGCGTTGATTTGTGTCGGATCGTCCAAGAAGAGAGCGAGGAAGG	2	WT	VKSATLSSTESTASGMQDEVRAVGEEQRSEEPKRRVDTSVSWEALICVGSSKKRARKASSSDDEGGPRTLGGDGHRAEEASKDKE	VKSATLSSTESTASGMQDEVRAVGEEQRSEEPKRRVDTSVSWEALICVGSSKKRARKASSSDDEGGPRTLGGDGHRAEEASKDKE
CACGGCGTCTGGAATGCAGGATGAGGTCAGAGCGGTTGGCGAGGAGCAAAGGTCAGAGGAGCCAAAGCGCAGGGTGGATACTTCAGTGTCTTGGGAGGCGTTGATTTGTGTCGGATCGTCCAAGAAGAGAGCGAGGAAGG	CACGGCGTCTGGAATGCAGGATGAGGTCAGAGCGGTTGGCGAGGAGCAAAGGTCAGAGGAGCTAAAGCGCAGGGTGGATACTTCAGTGTCTTGGGAGGCGTTGATTTGTGTCGGATCGTCCAAGAAGAGAGCGAGGAAGG	2	WT	VKSATLSSTESTASGMQDEVRAVGEEQRSEEPKRRVDTSVSWEALICVGSSKKRARKASSSDDEGGPRTLGGDGHRAEEASKDKE	VKSATLSSTESTASGMQDEVRAVGEEQRSEEPKRRVDTSVSWEALICVGSSKKRARKASSSDDEGGPRTLGGDGHRAEEASKDKE
CACGGCGTCTGGAATGCAGGATGAGGTCAGAGCGGTTGGCGAGGAGCAAAGGTCAGAGGAGCCAAAGCGCAGGGTGGATACTTCAGTGTCTTGGGAGGCGTTGATTTGTGTCGGATCGTCCAAGAAGAGAGCGAGGAAGG	CACGGCGTCTGGAATGCAGGATGAGGTCAGAGCGGTTGGCGAGGAGCAAAGGTCAGAGGAGCCAAAGCGCAGGGTGGATACTTCAGTGTCTTGGGAGACGTTGATTTGTGTCGGATCGTCCAAGAAGAGAGCGAGGAAGG	2	WT	VKSATLSSTESTASGMQDEVRAVGEEQRSEEPKRRVDTSVSWEALICVGSSKKRARKASSSDDEGGPRTLGGDGHRAEEASKDKE	VKSATLSSTESTASGMQDEVRAVGEEQRSEEPKRRVDTSVSWEALICVGSSKKRARKASSSDDEGGPRTLGGDGHRAEEASKDKE
CACGGCGTCTGGAATGCAGGATGAGGTCAGAGCGGTTGGCGAGGAGCAAAGGTCAGAGGAGCCAAAGCGCAGGGTGGATACTTCAGTGTCTTGGGAGGCGTTGATTTGTGTCGGATCGTCCAAGAAGAGAGCGAGGAAGG	CACGGCGTCTGGAATGCAGGATGAGGTCAGAGCGGTTGGCGAGGAGCAAAGGTCAGAGGAGCCAAAGCGCAGGGTGGATACTTCAGTGTCTTGGGAGGCGTTGATTTGTGTCGGATCTTCCAAGAAGAGAGCGAGGAAGG	2	WT	VKSATLSSTESTASGMQDEVRAVGEEQRSEEPKRRVDTSVSWEALICVGSSKKRARKASSSDDEGGPRTLGGDGHRAEEASKDKE	VKSATLSSTESTASGMQDEVRAVGEEQRSEEPKRRVDTSVSWEALICVGSSKKRARKASSSDDEGGPRTLGGDGHRAEEASKDKE
CACGGCGTCTGGAATGCAGGATGAGGTCAGAGCGGTTGGCGAGGAGCAAAGGTCAGAGGAGCCAAAGCGCAGGGTGGATACTTCAGTGTCTTGGGAGGCGTTGATTTGTGTCGGATCGTCCAAGAAGAGAGCGAGGAAGG	CACGGCGTCTGGAATGCAGGATGAGGTCAGAGCGGTTGGCGAGGAGCAAAGGTCAGAGGAGCCAAAGCACAGGGTGGATACTTCAGTGTCTTGGGAGGCGTTGATTTGTGTCGGATCGTCCAAGAAGAGAGCGAGGAAGG	2	WT	VKSATLSSTESTASGMQDEVRAVGEEQRSEEPKRRVDTSVSWEALICVGSSKKRARKASSSDDEGGPRTLGGDGHRAEEASKDKE	VKSATLSSTESTASGMQDEVRAVGEEQRSEEPKRRVDTSVSWEALICVGSSKKRARKASSSDDEGGPRTLGGDGHRAEEASKDKE
CACGGCGTCTGGAATGCAGGATGAGGTCAGAGCGGTTGGCGAGGAGCAAAGGTCAGAGGAGCCAAAGCGCAGGGTGGATACTTCAGTGTCTTGGGAGGCGTTGATTTGTGTCGGATCGTCCAAGAAGAGAGCGAGGAAGG	CACGGCGTCTGGAATGCAGGATGAGGTCAGAGCGGTTGGCGAGGAGCAAAGGTCAGAGGAGCCAAAGCGCAGGTTGGATACTTCAGTGTCTTGGGAGGCGTTGATTTGTGTCGGATCGTCCAAGAAGAGAGCGAGGAAGG	2	WT	VKSATLSSTESTASGMQDEVRAVGEEQRSEEPKRRVDTSVSWEALICVGSSKKRARKASSSDDEGGPRTLGGDGHRAEEASKDKE	VKSATLSSTESTASGMQDEVRAVGEEQRSEEPKRRVDTSVSWEALICVGSSKKRARKASSSDDEGGPRTLGGDGHRAEEASKDKE
CACGGCGTCTGGAATGCAGGATGAGGTCAGAGCGGTTGGCGAGGAGCAAAGGTCAGAGGAGCCAAAGCGCAGGGTGGATACTTCAGTGTCTTGGGAGGCGTTGATTTGTGTCGGATCGTCCAAGAAGAGAGCGAGGAAGG	CACGGCGTCTGGAATGCAGGATGAGGTCAGAGCGGTTGGCGAGGAGCAAAGGTCAGAGGAGCCAAAGCGCAGGGTGGATACTTCAGTGTCTTGGGAGGCGGTGATTTGTGTCGGATCGTCCAAGAAGAGAGCGAGGAAGG	2	WT	VKSATLSSTESTASGMQDEVRAVGEEQRSEEPKRRVDTSVSWEALICVGSSKKRARKASSSDDEGGPRTLGGDGHRAEEASKDKE	VKSATLSSTESTASGMQDEVRAVGEEQRSEEPKRRVDTSVSWEALICVGSSKKRARKASSSDDEGGPRTLGGDGHRAEEASKDKE
CACGGCGTCTGGAATGCAGGATGAGGTCAGAGCGGTTGGCGAGGAGCAAAGGTCAGAGGAGCCAAAGCGCAGGGTGGATACTTCAGTGTCTTGGGAGGCGTTGATTTGTGTCGGATCGTCCAAGAAGAGAGCGAGGAAGG	CACGGCGTCTGGAATGCAGGATGAGGTCAGAGCGGTTGGCGAGGAGCAAAGGTCAGAGGAGCCAAAGCGCAGGGTGGATACTTCAGTGTCTTGGGAGGCGCTGATTTGCGTCGGATCGTCCAAGAAGAGAGCGAGGAAGG	2	WT	VKSATLSSTESTASGMQDEVRAVGEEQRSEEPKRRVDTSVSWEALICVGSSKKRARKASSSDDEGGPRTLGGDGHRAEEASKDKE	VKSATLSSTESTASGMQDEVRAVGEEQRSEEPKRRVDTSVSWEALICVGSSKKRARKASSSDDEGGPRTLGGDGHRAEEASKDKE
CACGGCGTCTGGAATGCAGGATGAGGTCAGAGCGGTTGGCGAGGAGCAAAGGTCAGAGGAGCCAAAGCGCAGGGTGGATACTTCAGTGTCTTGGGAGGCGTTGATTTGTGTCGGATCGTCCAAGAAGAGAGCGAGGAAGG	CACGGCGTCTGGAATGCAGGATGAGGTCAGAGCGGTTGGCGAGGAGCAAAGGTCAGAGGAACCAAAGCGCAGGGTGGATACCTCAGTGTCTTGGGAGGCGTTGATTTGTGTCGGATCGTCCAAGAAGAGAGCGAGGAAGG	2	WT	VKSATLSSTESTASGMQDEVRAVGEEQRSEEPKRRVDTSVSWEALICVGSSKKRARKASSSDDEGGPRTLGGDGHRAEEASKDKE	VKSATLSSTESTASGMQDEVRAVGEEQRSEEPKRRVDTSVSWEALICVGSSKKRARKASSSDDEGGPRTLGGDGHRAEEASKDKE
CACGGCGTCTGGAATGCAGGATGAGGTCAGAGCGGTTGGCGAGGAGCAAAGGTCAGAGGAGCCAAAGCGCAGGGTGGATACTTCAGTGTCTTGGGAGGCGTTGATTTGTGTCGGATCGTCCAAGAAGAGAGCGAGGAAGG	CACGGCGTCTGGAATGCAGGATGAGGTCAGAGCGGTTGGCGAGGAGCAAAGGTCAGAGGAGCCAAAGCGCAGGGTGGATACTTCAGTGTCTTGGGAGGCGTTGATTTGTGTCGGATCGTCCTAGAAGAGAGCGAGGAAGG	2	WT	VKSATLSSTESTASGMQDEVRAVGEEQRSEEPKRRVDTSVSWEALICVGSSKKRARKASSSDDEGGPRTLGGDGHRAEEASKDKE	VKSATLSSTESTASGMQDEVRAVGEEQRSEEPKRRVDTSVSWEALICVGSSKKRARKASSSDDEGGPRTLGGDGHRAEEASKDKE
CACGGCGTCTGGAATGCAGGATGAGGTCAGAGCGGTTGGCGAGGAGCAAAGGTCAGAGGAGCCAAAGCGCAGGGTGGATACTTCAGTGTCTTGGGAGGCGTTGATTTGTGTCGGATCGTCCAAGAAGAGAGCGAGGAAGG	CACGGCGTCTGGAATGCAGGATGAGGTCAGAGCGGTTGGCGAGGAGCAAAGGTCAGAGGAGCCAAAGCGCAGGGTGGATACTTCAGTGTCTTGAGAGGCGTTGATTTGTGTCGGATCGTCCAAGAAGAGAGCGAGGAAGG	2	WT	VKSATLSSTESTASGMQDEVRAVGEEQRSEEPKRRVDTSVSWEALICVGSSKKRARKASSSDDEGGPRTLGGDGHRAEEASKDKE	VKSATLSSTESTASGMQDEVRAVGEEQRSEEPKRRVDTSVSWEALICVGSSKKRARKASSSDDEGGPRTLGGDGHRAEEASKDKE
CACGGCGTCTGGAATGCAGGATGAGGTCAGAGCGGTTGGCGAGGAGCAAAGGTCAGAGGAGCCAAAGCGCAGGGTGGATACTTCAGTGTCTTGGGAGGCGTTGATTTGTGTCGGATCGTCCAAGAAGAGAGCGAGGAAGG	CACGGCGTCTGGAATGCAGGATGAGGTCAGAGCGGTTGGCGAGGAGCAAAGGTCAGAGAAGCCAAAGCGCAGGGTGGATACTTCAGTGTCTTGGGAGGCGTTGATTTGTGTCGGATCGTCCAAGAAGAGAGCGAGGAAGG	2	WT	VKSATLSSTESTASGMQDEVRAVGEEQRSEEPKRRVDTSVSWEALICVGSSKKRARKASSSDDEGGPRTLGGDGHRAEEASKDKE	VKSATLSSTESTASGMQDEVRAVGEEQRSEEPKRRVDTSVSWEALICVGSSKKRARKASSSDDEGGPRTLGGDGHRAEEASKDKE
CACGGCGTCTGGAATGCAGGATGAGGTCAGAGCGGTTGGCGAGGAGCAAAGGTCAGAGGAGCCAAAGCGCAGGGTGGATACTTCAGTGTCTTGGGAGGCGTTGATTTGTGTCGGATCGTCCAAGAAGAGAGCGAGGAAGG	CACGGCGTCTGGAATGCAGGATGGGGTCAGAGCGGTTGGCGAGGAGCAAAGGTCAGAGGAGCCAAAGCGCAGGGTGGATACTTCAGTGTCTTGGGAGGCGTTGATGTGTGTCGGATCGTCCAAGAAGAGAGCGAGGAAGG	2	WT	VKSATLSSTESTASGMQDEVRAVGEEQRSEEPKRRVDTSVSWEALICVGSSKKRARKASSSDDEGGPRTLGGDGHRAEEASKDKE	VKSATLSSTESTASGMQDEVRAVGEEQRSEEPKRRVDTSVSWEALICVGSSKKRARKASSSDDEGGPRTLGGDGHRAEEASKDKE
CACGGCGTCTGGAATGCAGGATGAGGTCAGAGCGGTTGGCGAGGAGCAAAGGTCAGAGGAGCCAAAGCGCAGGGTGGATACTTCAGTGTCTTGGGAGGCGTTGATTTGTGTCGGATCGTCCAAGAAGAGAGCGAGGAAGG	CACGGCGTCTGGAATGCAGGACGAGGTCAGAGCGGTTGGCGAGGAGCAAAGGTCAGAGGAGCCAAAGCGCAGGGTGGATACTTCAGTGTCTTGGGAGGCGTTGATTTGTGTCGGGTCGTCCAAGAAGAGAGCGAGGAAGG	2	WT	VKSATLSSTESTASGMQDEVRAVGEEQRSEEPKRRVDTSVSWEALICVGSSKKRARKASSSDDEGGPRTLGGDGHRAEEASKDKE	VKSATLSSTESTASGMQDEVRAVGEEQRSEEPKRRVDTSVSWEALICVGSSKKRARKASSSDDEGGPRTLGGDGHRAEEASKDKE
CACGGCGTCTGGAATGCAGGATGAGGTCAGAGCGGTTGGCGAGGAGCAAAGGTCAGAGGAGCCAAAGCGCAGGGTGGATACTTCAGTGTCTTGGGAGGCGTTGATTTGTGTCGGATCGTCCAAGAAGAGAGCGAGGAAGG	CACGGCGTCTGGAATGCAGGATGAGGTCAGAGCGGTTGGCGAGGAGCTAAGGTCAGAGGAGCCAAAGCGCAGGGTGGATACTTCAGTGTCTTGGGAGGCGTTGATTTGTGTCGGATCGTCCAAGAAGAGAGCGAGGAAGG	2	WT	VKSATLSSTESTASGMQDEVRAVGEEQRSEEPKRRVDTSVSWEALICVGSSKKRARKASSSDDEGGPRTLGGDGHRAEEASKDKE	VKSATLSSTESTASGMQDEVRAVGEEQRSEEPKRRVDTSVSWEALICVGSSKKRARKASSSDDEGGPRTLGGDGHRAEEASKDKE
CACGGCGTCTGGAATGCAGGATGAGGTCAGAGCGGTTGGCGAGGAGCAAAGGTCAGAGGAGCCAAAGCGCAGGGTGGATACTTCAGTGTCTTGGGAGGCGTTGATTTGTGTCGGATCGTCCAAGAAGAGAGCGAGGAAGG	CACGGCGTCTGGAATGCAGGATGAGGTCAGAGCGGTTGGCGAGGAGCAAAGGTCAGAGGAGCCAAAGCGCAGGGTGGATACTTCAGTGTCTTGGGAGGCGTTGATTTGTGTCGGATCATCCAAGAAGAGGGCGAGGAAGG	2	WT	VKSATLSSTESTASGMQDEVRAVGEEQRSEEPKRRVDTSVSWEALICVGSSKKRARKASSSDDEGGPRTLGGDGHRAEEASKDKE	VKSATLSSTESTASGMQDEVRAVGEEQRSEEPKRRVDTSVSWEALICVGSSKKRARKASSSDDEGGPRTLGGDGHRAEEASKDKE
CACGGCGTCTGGAATGCAGGATGAGGTCAGAGCGGTTGGCGAGGAGCAAAGGTCAGAGGAGCCAAAGCGCAGGGTGGATACTTCAGTGTCTTGGGAGGCGTTGATTTGTGTCGGATCGTCCAAGAAGAGAGCGAGGAAGG	CACGGCGTCTGAAATGCAGGATGAGGTCAGAGCGGTTGGCGAGGAGCAAAGGTCAGTGGAGCCAAAGCGCAGGGTGGATACTTCAGTGTCTTGGGAGGCGTTGATTTGTGTCGGATCGTCCAAGAAGAGAGCGAGGAAGG	2	WT	VKSATLSSTESTASGMQDEVRAVGEEQRSEEPKRRVDTSVSWEALICVGSSKKRARKASSSDDEGGPRTLGGDGHRAEEASKDKE	VKSATLSSTESTASGMQDEVRAVGEEQRSEEPKRRVDTSVSWEALICVGSSKKRARKASSSDDEGGPRTLGGDGHRAEEASKDKE
CACGGCGTCTGGAATGCAGGATGAGGTCAGAGCGGTTGGCGAGGAGCAAAGGTCAGAGGAGCCAAAGCGCAGGGTGGATACTTCAGTGTCTTGGGAGGCGTTGATTTGTGTCGGATCGTCCAAGAAGAGAGCGAGGAAGG	CACGGCGTCTGGAATGCAGGATGAGGTCAGAGCGGTTGGCGAGGAGCAAAGGTCAGAGGAGCCAAAGCGCAGGGTGGATACTTCAGTGTCTTGGGAGGCGTTGATTTGTGTCGGATCGTCCAAGAAGAGTGCGAGGAAGG	2	WT	VKSATLSSTESTASGMQDEVRAVGEEQRSEEPKRRVDTSVSWEALICVGSSKKRARKASSSDDEGGPRTLGGDGHRAEEASKDKE	VKSATLSSTESTASGMQDEVRAVGEEQRSEEPKRRVDTSVSWEALICVGSSKKRARKASSSDDEGGPRTLGGDGHRAEEASKDKE
CACGGCGTCTGGAATGCAGGATGAGGTCAGAGCGGTTGGCGAGGAGCAAAGGTCAGAGGAGCCAAAGCGCAGGGTGGATACTTCAGTGTCTTGGGAGGCGTTGATTTGTGTCGGATCGTCCAAGAAGAGAGCGAGGAAGG	CACGGCGTCTGGAATGCAGGATGAGGTCAGAGCGGTTGGCGAGGAGCAAAGGTCAGAGGAGCCAAAGCGCAGGGTGGATACTTCAGTGTCTTGGGAGGCGTTGATTTGTGTCGGATCGTCCAAGAAGAGAGCGAGGAAGA	2	WT	VKSATLSSTESTASGMQDEVRAVGEEQRSEEPKRRVDTSVSWEALICVGSSKKRARKASSSDDEGGPRTLGGDGHRAEEASKDKE	VKSATLSSTESTASGMQDEVRAVGEEQRSEEPKRRVDTSVSWEALICVGSSKKRARKASSSDDEGGPRTLGGDGHRAEEASKDKE
CACGGCGTCTGGAATGCAGGATGAGGTCAGAGCGGTTGGCGAGGAGCAAAGGTCAGAGGAGCCAAAGCGCAGGGTGGATACTTCAGTGTCTTGGGAGGCGTTGATTTGTGTCGGATCGTCCAAGAAGAGAGCGAGGAAGG	CACGGCGTCTGGAATGCAGGATGAGGTCAGAGCGGTTGGCGAGGAGCAAAGGTCAGAGGAGCCAAAGCGCAGGGTGGATACTTCAGTGTCTTGGGAGGCGTTGATTTGTGTCGGATCGTCCACGAAGAGAGCGAGGAAGG	2	WT	VKSATLSSTESTASGMQDEVRAVGEEQRSEEPKRRVDTSVSWEALICVGSSKKRARKASSSDDEGGPRTLGGDGHRAEEASKDKE	VKSATLSSTESTASGMQDEVRAVGEEQRSEEPKRRVDTSVSWEALICVGSSKKRARKASSSDDEGGPRTLGGDGHRAEEASKDKE
CACGGCGTCTGGAATGCAGGATGAGGTCAGAGCGGTTGGCGAGGAGCAAAGGTCAGAGGAGCCAAAGCGCAGGGTGGATACTTCAGTGTCTTGGGAGGCGTTGATTTGTGTCGGATCGTCCAAGAAGAGAGCGAGGAAGG	CACGGCGTCTGGAATGCAGGATGAGATCAGAGCGGTTGGCGAGGAGCAAAGGTCAGAGGAGCCAAAGCGCAGGGTGGATACTTCAGTGTCTTGGGAGGCGTTGATTTGTGTCGGATCGTCCAAGAAGAGAGCGAGGAAGG	2	WT	VKSATLSSTESTASGMQDEVRAVGEEQRSEEPKRRVDTSVSWEALICVGSSKKRARKASSSDDEGGPRTLGGDGHRAEEASKDKE	VKSATLSSTESTASGMQDEVRAVGEEQRSEEPKRRVDTSVSWEALICVGSSKKRARKASSSDDEGGPRTLGGDGHRAEEASKDKE
CACGGCGTCTGGAATGCAGGATGAGGTCAGAGCGGTTGGCGAGGAGCAAAGGTCAGAGGAGCCAAAGCGCAGGGTGGATACTTCAGTGTCTTGGGAGGCGTTGATTTGTGTCGGATCGTCCAAGAAGAGAGCGAGGAAGG	CACGGCGTCTGGAATGCAGGATGAGGTCAGAGCGGTTGGCGAGGAGCAAAGGTCAGAGGAGCCGAAGCGCAGGGTGGATACTCCAGTGTCTTGGGAGGCGTTGATTTGTGTCGGATCGTCCAAGAAGAGAGCGAGGAAGG	2	WT	VKSATLSSTESTASGMQDEVRAVGEEQRSEEPKRRVDTSVSWEALICVGSSKKRARKASSSDDEGGPRTLGGDGHRAEEASKDKE	VKSATLSSTESTASGMQDEVRAVGEEQRSEEPKRRVDTSVSWEALICVGSSKKRARKASSSDDEGGPRTLGGDGHRAEEASKDKE
CACGGCGTCTGGAATGCAGGATGAGGTCAGAGCGGTTGGCGAGGAGCAAAGGTCAGAGGAGCCAAAGCGCAGGGTGGATACTTCAGTGTCTTGGGAGGCGTTGATTTGTGTCGGATCGTCCAAGAAGAGAGCGAGGAAGG	CACGGCGTCTGGAATGCAGGATGAGGTCAGAGCGGTTGGCGAGTAGCAAAGGTCAGAGGAGCCAAAGCGCAGGGTGGATACTTCAGTGTCTTGGGAGGCGTTGATTTGTGTCGGATCGTCCAAGAAGAGAGCGAGGAAGG	2	WT	VKSATLSSTESTASGMQDEVRAVGEEQRSEEPKRRVDTSVSWEALICVGSSKKRARKASSSDDEGGPRTLGGDGHRAEEASKDKE	VKSATLSSTESTASGMQDEVRAVGEEQRSEEPKRRVDTSVSWEALICVGSSKKRARKASSSDDEGGPRTLGGDGHRAEEASKDKE
CACGGCGTCTGGAATGCAGGATGAGGTCAGAGCGGTTGGCGAGGAGCAAAGGTCAGAGGAGCCAAAGCGCAGGGTGGATACTTCAGTGTCTTGGGAGGCGTTGATTTGTGTCGGATCGTCCAAGAAGAGAGCGAGGAAGG	CACGGCGTCTGGAATGC-GGATGAGGTCAGAGCGGTTGGCGAGGAGCAAAGGTCAGAGGAGCCAAAGCGCAGGGTGGATACTTCAGTGTCTTGGGAGGCGTTGATTTGTGTCGGATCGTCCAAGAAGAGAGCGAGGAAGG	2	WT	VKSATLSSTESTASGMQDEVRAVGEEQRSEEPKRRVDTSVSWEALICVGSSKKRARKASSSDDEGGPRTLGGDGHRAEEASKDKE	VKSATLSSTESTASGMQDEVRAVGEEQRSEEPKRRVDTSVSWEALICVGSSKKRARKASSSDDEGGPRTLGGDGHRAEEASKDKE
CACGGCGTCTGGAATGCAGGATGAGGTCAGAGCGGTTGGCGAGGAGCAAAGGTCAGAGGAGCCAAAGCGCAGGGTGGATACTTCAGTGTCTTGGGAGGCGTTGATTTGTGTCGGATCGTCCAAGAAGAGAGCGAGGAAGG	CACGGCGTCTGGAATGCAGGATGAGGTCAGAGCGGTTGGCGAGGAGCAAAGGTCAGAGGAGCCAAAGCGCAGGGTGGATACTTCAGTGTCTTGGGAGGCGTTGATTTGCGTCGGATCGTCCAAGAAGAGAGCGAGGAAGG	2	WT	VKSATLSSTESTASGMQDEVRAVGEEQRSEEPKRRVDTSVSWEALICVGSSKKRARKASSSDDEGGPRTLGGDGHRAEEASKDKE	VKSATLSSTESTASGMQDEVRAVGEEQRSEEPKRRVDTSVSWEALICVGSSKKRARKASSSDDEGGPRTLGGDGHRAEEASKDKE
CACGGCGTCTGGAATGCAGGATGAGGTCAGAGCGGTTGGCGAGGAGCAAAGGTCAGAGGAGCCAAAGCGCAGGGTGGATACTTCAGTGTCTTGGGAGGCGTTGATTTGTGTCGGATCGTCCAAGAAGAGAGCGAGGAAGG	CACGGCGTCTGGAATGCAGGATGAGGTCAGAGCGGTTGGCGAGGAGCAAAGATCAGAGGAGCCAAAGCGCAGGGTGGATACTTCAGTGTCTTGGGAGGCGTTGATTTGTGTCGGATCGTCCAAGAAGAGAGCGAGGAAGG	2	WT	VKSATLSSTESTASGMQDEVRAVGEEQRSEEPKRRVDTSVSWEALICVGSSKKRARKASSSDDEGGPRTLGGDGHRAEEASKDKE	VKSATLSSTESTASGMQDEVRAVGEEQRSEEPKRRVDTSVSWEALICVGSSKKRARKASSSDDEGGPRTLGGDGHRAEEASKDKE
CACGGCGTCTGGAATGCAGGATGAGGTCAGAGCGGTTGGCGAGGAGCAAAGGTCAGAGGAGCCAAAGCGCAGGGTGGATACTTCAGTGTCTTGGGAGGCGTTGATTTGTGTCGGATCGTCCAAGAAGAGAGCGAGGAAGG	CACGGCGTCTGGAATGCAGGATGAGGTCAGAGCAGTTGGCGAGGAGCAAAGGTCAGAGGAGCCAAAGCGCAGGGTGGATACTTCAGTGTCTTGGGAGGCGTTGATTTGTGTCGGATCGTCCAAGAAGAGAGCGAGGAAGG	2	WT	VKSATLSSTESTASGMQDEVRAVGEEQRSEEPKRRVDTSVSWEALICVGSSKKRARKASSSDDEGGPRTLGGDGHRAEEASKDKE	VKSATLSSTESTASGMQDEVRAVGEEQRSEEPKRRVDTSVSWEALICVGSSKKRARKASSSDDEGGPRTLGGDGHRAEEASKDKE
CACGGCGTCTGGAATGCAGGATGAGGTCAGAGCGGTTGGCGAGGAGCAAAGGTCAGAGGAGCCAAAGCGCAGGGTGGATACTTCAGTGTCTTGGGAGGCGTTGATTTGTGTCGGATCGTCCAAGAAGAGAGCGAGGAAGG	CACGGCGTCTGGAATGCAGGATGAGGTCAGTGCGGTTGGCGAGGAGCAAAGGTCAGAGGAGCCAAAGCGCAGGGTGGATACTTCAGTGTCTTGGGAGGCGTTGATTTGTGTCGGATCGTCCAAGAAGAGAGCGAGGAAGG	2	WT	VKSATLSSTESTASGMQDEVRAVGEEQRSEEPKRRVDTSVSWEALICVGSSKKRARKASSSDDEGGPRTLGGDGHRAEEASKDKE	VKSATLSSTESTASGMQDEVRAVGEEQRSEEPKRRVDTSVSWEALICVGSSKKRARKASSSDDEGGPRTLGGDGHRAEEASKDKE
CACGGCGTCTGGAATGCAGGATGAGGTCAGAGCGGTTGGCGAGGAGCAAAGGTCAGAGGAGCCAAAGCGCAGGGTGGATACTTCAGTGTCTTGGGAGGCGTTGATTTGTGTCGGATCGTCCAAGAAGAGAGCGAGGAAGG	CACGGCGTCTGGAACGCAGGATGAGGTCAGAGCGGTTGGCGAGGAGCAAAGGTCAGAGGAGCCAAAGCGCAGGGTGGATACTTCAGTGTTTTGGGAGGCGTTGATTTGTGTCGGATCGTCCAAGAAGAGAGCGAGGAAGG	2	WT	VKSATLSSTESTASGMQDEVRAVGEEQRSEEPKRRVDTSVSWEALICVGSSKKRARKASSSDDEGGPRTLGGDGHRAEEASKDKE	VKSATLSSTESTASGMQDEVRAVGEEQRSEEPKRRVDTSVSWEALICVGSSKKRARKASSSDDEGGPRTLGGDGHRAEEASKDKE
CACGGCGTCTGGAATGCAGGATGAGGTCAGAGCGGTTGGCGAGGAGCAAAGGTCAGAGGAGCCAAAGCGCAGGGTGGATACTTCAGTGTCTTGGGAGGCGTTGATTTGTGTCGGATCGTCCAAGAAGAGAGCGAGGAAGG	CACGGCGTCTGGAATGCAGGATGAGGTCAGAGCGGTTGGCGAGGAGCAAAGGTCAGAGGAACCAAAGCGCAGGGTGGATACTTCAGTGTCTTGGGAGGCGTTGATTTGTGTCGGATCGTCCAAGAAGAGAGCGAGGAAGG	2	WT	VKSATLSSTESTASGMQDEVRAVGEEQRSEEPKRRVDTSVSWEALICVGSSKKRARKASSSDDEGGPRTLGGDGHRAEEASKDKE	VKSATLSSTESTASGMQDEVRAVGEEQRSEEPKRRVDTSVSWEALICVGSSKKRARKASSSDDEGGPRTLGGDGHRAEEASKDKE
CACGGCGTCTGGAATGCAGGATGAGGTCAGAGCGGTTGGCGAGGAGCAAAGGTCAGAGGAGCCAAAGCGCAGGGTGGATACTTCAGTGTCTTGGGAGGCGTTGATTTGTGTCGGATCGTCCAAGAAGAGAGCGAGGAAGG	CACGGCGTCTGGAATGCAGGATGAGGTCAGAGCGGTTGGCGAGGAGCAAAGGTCAGAGGAGCCAAAGCGCAGGGTGGATACTACAGTGTCTTGGGAGGCGTTGATTTGTGTCGGATCGTCCAAGAAGAGAGCGAGGAAGG	2	WT	VKSATLSSTESTASGMQDEVRAVGEEQRSEEPKRRVDTSVSWEALICVGSSKKRARKASSSDDEGGPRTLGGDGHRAEEASKDKE	VKSATLSSTESTASGMQDEVRAVGEEQRSEEPKRRVDTSVSWEALICVGSSKKRARKASSSDDEGGPRTLGGDGHRAEEASKDKE
CACGGCGTCTGGAATGCAGGATGAGGTCAGAGCGGTTGGCGAGGAGCAAAGGTCAGAGGAGCCAAAGCGCAGGGTGGATACTTCAGTGTCTTGGGAGGCGTTGATTTGTGTCGGATCGTCCAAGAAGAGAGCGAGGAAGG	CACGGCGTCTGGAATGCAGGATGAGGACAGAGCGGTTGGCGAGGAGCAAAGGTCAGAGGAGCCAAAGCGCAGGGTGGATACTTCAGTGTCTTGGGAGGCGTTGATTTGTGTCGGATCGTCCAAGAAGAGAGCGAGGAAGG	2	WT	VKSATLSSTESTASGMQDEVRAVGEEQRSEEPKRRVDTSVSWEALICVGSSKKRARKASSSDDEGGPRTLGGDGHRAEEASKDKE	VKSATLSSTESTASGMQDEVRAVGEEQRSEEPKRRVDTSVSWEALICVGSSKKRARKASSSDDEGGPRTLGGDGHRAEEASKDKE
CACGGCGTCTGGAATGCAGGATGAGGTCAGAGCGGTTGGCGAGGAGCAAAGGTCAGAGGAGCCAAAGCGCAGGGTGGATACTTCAGTGTCTTGGGAGGCGTTGATTTGTGTCGGATCGTCCAAGAAGAGAGCGAGGAAGG	CACGGCGTCTGGAATGCAGGATGAGGTCAGAGCGGTTGGCGAGGAGCAAAGGTCAGAGGAGCCAAAGCGCAGGGTGGATACTTCAGTGTCTTGGGAGGCGTTGATTTGTGTCGGANCGTCCAAGAAGAGAGCGAGGAAGG	2	WT	VKSATLSSTESTASGMQDEVRAVGEEQRSEEPKRRVDTSVSWEALICVGSSKKRARKASSSDDEGGPRTLGGDGHRAEEASKDKE	VKSATLSSTESTASGMQDEVRAVGEEQRSEEPKRRVDTSVSWEALICVGSSKKRARKASSSDDEGGPRTLGGDGHRAEEASKDKE
CACGGCGTCTGGAATGCAGGATGAGGTCAGAGCGGTTGGCGAGGAGCAAAGGTCAGAGGAGCCAAAGCGCAGGGTGGATACTTCAGTGTCTTGGGAGGCGTTGATTTGTGTCGGATCGTCCAAGAAGAGAGCGAGGAAGG	CACGGCGTCTGGAATGCAGGATGAGGTCAGAGCGGTTGGCGAGGAGCAAAGGTCAGAGGAGCCAAAGCGCAGGGTGGATACTTCAGTGTCTTGGGAGGCGATGATTTGTGTCGGATCGTCCAAGAAGAGAGCGAGGAAGG	2	WT	VKSATLSSTESTASGMQDEVRAVGEEQRSEEPKRRVDTSVSWEALICVGSSKKRARKASSSDDEGGPRTLGGDGHRAEEASKDKE	VKSATLSSTESTASGMQDEVRAVGEEQRSEEPKRRVDTSVSWEALICVGSSKKRARKASSSDDEGGPRTLGGDGHRAEEASKDKE
CACGGCGTCTGGAATGCAGGATGAGGTCAGAGCGGTTGGCGAGGAGCAAAGGTCAGAGGAGCCAAAGCGCAGGGTGGATACTTCAGTGTCTTGGGAGGCGTTGATTTGTGTCGGATCGTCCAAGAAGAGAGCGAGGAAGG	CACGGCGTCTGGAATGCAGGATGAGGTCAGAGCGGTTAGCGAGGAGCAAAGGTCAGAGGAGCCAAAGCGCAGGGTGGATACTTCAGTGTCTTGGGAGGCGTTGATTTGTGTCGGATCGTCCAAGAAGAGAGCGAGGAAGG	2	WT	VKSATLSSTESTASGMQDEVRAVGEEQRSEEPKRRVDTSVSWEALICVGSSKKRARKASSSDDEGGPRTLGGDGHRAEEASKDKE	VKSATLSSTESTASGMQDEVRAVGEEQRSEEPKRRVDTSVSWEALICVGSSKKRARKASSSDDEGGPRTLGGDGHRAEEASKDKE
CACGGCGTCTGGAATGCAGGATGAGGTCAGAGCGGTTGGCGAGGAGCAAAGGTCAGAGGAGCCAAAGCGCAGGGTGGATACTTCAGTGTCTTGGGAGGCGTTGATTTGTGTCGGATCGTCCAAGAAGAGAGCGAGGAAGG	CACGGCGTCCGGAATGCAGGATGAGGTCAGAGCGGTTGGCGAGGAGCAAAGGTCAGAGGAGCCAAAGCGCAGGGTGGATACTTCAGTGTCTCGGGAGGCGTTGATTTGTGTCGGATCGTCCAAGAAGAGAGCGAGGAAGG	2	WT	VKSATLSSTESTASGMQDEVRAVGEEQRSEEPKRRVDTSVSWEALICVGSSKKRARKASSSDDEGGPRTLGGDGHRAEEASKDKE	VKSATLSSTESTASGMQDEVRAVGEEQRSEEPKRRVDTSVSWEALICVGSSKKRARKASSSDDEGGPRTLGGDGHRAEEASKDKE
CACGGCGTCTGGAATGCAGGATGAGGTCAGAGCGGTTGGCGAGGAGCAAAGGTCAGAGGAGCCAAAGCGCAGGGTGGATACTTCAGTGTCTTGGGAGGCGTTGATTTGTGTCGGATCGTCCAAGAAGAGAGCGAGGAAGG	CACGGCGTCTGGAATGCAGGATGAGGTCAGAGCGGTTGGTGAGGAGCAAAGGTCAGAGGAGCCAAAGCGCAGGGTGGATACTTCAGTGTCTTGGGAGGCGTTGATTTGTGTCGGATCGTCCAAGAAGAGAGCGAGGAAGG	2	WT	VKSATLSSTESTASGMQDEVRAVGEEQRSEEPKRRVDTSVSWEALICVGSSKKRARKASSSDDEGGPRTLGGDGHRAEEASKDKE	VKSATLSSTESTASGMQDEVRAVGEEQRSEEPKRRVDTSVSWEALICVGSSKKRARKASSSDDEGGPRTLGGDGHRAEEASKDKE
CACGGCGTCTGGAATGCAGGATGAGGTCAGAGCGGTTGGCGAGGAGCAAAGGTCAGAGGAGCCAAAGCGCAGGGTGGATACTTCAGTGTCTTGGGAGGCGTTGATTTGTGTCGGATCGTCCAAGAAGAGAGCGAGGAAGG	CACGGCGTCTGGAATGCAGGATGGGGTCAGAGCGGTTGGCGAGGAGCAAAGGTCGGAGGAGCCAAAGCGCAGGGTGGATACTTCAGTGTCTTGGGAGGCGTTGATTTGTGTCGGATCGTCCAAGAAGAGAGCGAGGAAGG	2	WT	VKSATLSSTESTASGMQDEVRAVGEEQRSEEPKRRVDTSVSWEALICVGSSKKRARKASSSDDEGGPRTLGGDGHRAEEASKDKE	VKSATLSSTESTASGMQDEVRAVGEEQRSEEPKRRVDTSVSWEALICVGSSKKRARKASSSDDEGGPRTLGGDGHRAEEASKDKE
CACGGCGTCTGGAATGCAGGATGAGGTCAGAGCGGTTGGCGAGGAGCAAAGGTCAGAGGAGCCAAAGCGCAGGGTGGATACTTCAGTGTCTTGGGAGGCGTTGATTTGTGTCGGATCGTCCAAGAAGAGAGCGAGGAAGG	CACGGCGTCTGGAATGCAGGATGAGGTCAGAGCGGTTGGCAAGGAGCAAAGGTCAGGGGAGCCAAAGCGCAGGGTGGATACTTCAGTGTCTTGGGAGGCGTTGATTTGTGTCGGATCGTCCAAGAAGAGAGCGAGGAAGG	2	WT	VKSATLSSTESTASGMQDEVRAVGEEQRSEEPKRRVDTSVSWEALICVGSSKKRARKASSSDDEGGPRTLGGDGHRAEEASKDKE	VKSATLSSTESTASGMQDEVRAVGEEQRSEEPKRRVDTSVSWEALICVGSSKKRARKASSSDDEGGPRTLGGDGHRAEEASKDKE

## Sheet: A2-Oil+CR-PMUT
Reference	Target sequence	Read count	Type	TargetAA	ReferenceAA
CACGGCGTCTGGAATGCAGGATGAGGTCAGAGCGGTTGGCGAGGAGCAAAGGTCAGAGGAGCCAAAGCGCAGGGTGGATACTTCAGTGTCTTGGGAGGCGTTGATTTGTGTCGGATCGTCCAAGAAGAGAGCGAGGAAGG	CACGGCGTCTGGAATGCAGGATGAGGTCAGAGCGGTTGGCGAGGAGCAAAGGTCAGAGGAGCCAAAGCGCAGGGTGGATACTTCAGTGTCTTGGGAGGCGTTGATTTGTGTCGGATCGTCCAAGAAGAGAGCGAGGAAGG	27208	WT	VKSATLSSTESTASGMQDEVRAVGEEQRSEEPKRRVDTSVSWEALICVGSSKKRARKASSSDDEGGPRTLGGDGHRAEEASKDKE	VKSATLSSTESTASGMQDEVRAVGEEQRSEEPKRRVDTSVSWEALICVGSSKKRARKASSSDDEGGPRTLGGDGHRAEEASKDKE
CACGGCGTCTGGAATGCAGGATGAGGTCAGAGCGGTTGGCGAGGAGCAAAGGTCAGAGGAGCCAAAGCGCAGGGTGGATACTTCAGTGTCTTGGGAGGCGTTGATTTGTGTCGGATCGTCCAAGAAGAGAGCGAGGAAGG	CACGGCGTCTGGAATGCAGGATGAGGTCAGAGCGGTTGGCGAGGAGCAAAGGTCAGAGGAGCCAAAGCGCAGGGTGGATACTGCAGTGGCTTGGGAGGCGTTGATTTGTGTCGGATCGTCCAAGAAGAGAGCGAGGAAGG	128	WT	VKSATLSSTESTASGMQDEVRAVGEEQRSEEPKRRVDTSVSWEALICVGSSKKRARKASSSDDEGGPRTLGGDGHRAEEASKDKE	VKSATLSSTESTASGMQDEVRAVGEEQRSEEPKRRVDTSVSWEALICVGSSKKRARKASSSDDEGGPRTLGGDGHRAEEASKDKE
CACGGCGTCTGGAATGCAGGATGAGGTCAGAGCGGTTGGCGAGGAGCAAAGGTCAGAGGAGCCAAAGCGCAGGGTGGATACTTCAGTGTCTTGGGAGGCGTTGATTTGTGTCGGATCGTCCAAGAAGAGAGCGAGGAAGG	CACGGCGTCTGGAATGCAGGATGAGGTCAGAGCGGTTGGCGAGGAGCAAAGGTCAGAGGAGCCAAAGCGCAGGGTGGATGCTGCAGTGGCTTGGGAGGCGTTGATTTGTGTCGGAGCGGCCAAGAAGAGAGCGAGGAAGG	1032	Base Change	VKSATLSSTESTASGMQDEVRAVGEEQRSEEPKRRVDAAVAWEALICVGAAKKRARKASSSDDEGGPRTLGGDGHRAEEASKDKE	VKSATLSSTESTASGMQDEVRAVGEEQRSEEPKRRVDTSVSWEALICVGSSKKRARKASSSDDEGGPRTLGGDGHRAEEASKDKE
CACGGCGTCTGGAATGCAGGATGAGGTCAGAGCGGTTGGCGAGGAGCAAAGGTCAGAGGAGCCAAAGCGCAGGGTGGATACTTCAGTGTCTTGGGAGGCGTTGATTTGTGTCGGATCGTCCAAGAAGAGAGCGAGGAAGG	CACGGCGTCTGGAATGCAGGATGAGGTCAGAGCGGTTGGCGAGGAGCAAAGGTCAGAGGAGCCAAAGCGCAGGGTGGATACTTCAGTGTCTTGGGAGGCGTTGATTTGTGTCGGAGCGGCCAAGAAGAGAGCGAGGAAGG	19	Base Change	VKSATLSSTESTASGMQDEVRAVGEEQRSEEPKRRVDTSVSWEALICVGAAKKRARKASSSDDEGGPRTLGGDGHRAEEASKDKE
CACGGCGTCTGGAATGCAGGATGAGGTCAGAGCGGTTGGCGAGGAGCAAAGGTCAGAGGAGCCAAAGCGCAGGGTGGATACTTCAGTGTCTTGGGAGGCGTTGATTTGTGTCGGATCGTCCAAGAAGAGAGCGAGGAAGG	CACGGCGTCTGGAATGCAGGATGGGGTCAGAGCGGTTGGCGAGGAGCAAAGGTCAGAGGAGCCAAAGCGCAGGGTGGATACTTCAGTGTCTTGGGAGGCGTTGATTTGTGTCGGATCGTCCAAGAAGAGAGCGAGGAAGG	10	WT	VKSATLSSTESTASGMQDEVRAVGEEQRSEEPKRRVDTSVSWEALICVGSSKKRARKASSSDDEGGPRTLGGDGHRAEEASKDKE	VKSATLSSTESTASGMQDEVRAVGEEQRSEEPKRRVDTSVSWEALICVGSSKKRARKASSSDDEGGPRTLGGDGHRAEEASKDKE
CACGGCGTCTGGAATGCAGGATGAGGTCAGAGCGGTTGGCGAGGAGCAAAGGTCAGAGGAGCCAAAGCGCAGGGTGGATACTTCAGTGTCTTGGGAGGCGTTGATTTGTGTCGGATCGTCCAAGAAGAGAGCGAGGAAGG	CACGGCGTCTGGAATGCAGGATGAGGTCAGAGCGGTTGGCGAGGAGCAAAGGTCAGAGGAGCCAAAGCGCAGGGTGGATACTTCAGTGCCTTGGGAGGCGTTGATTTGTGTCGGATCGTCCAAGAAGAGAGCGAGGAAGG	9	WT	VKSATLSSTESTASGMQDEVRAVGEEQRSEEPKRRVDTSVSWEALICVGSSKKRARKASSSDDEGGPRTLGGDGHRAEEASKDKE	VKSATLSSTESTASGMQDEVRAVGEEQRSEEPKRRVDTSVSWEALICVGSSKKRARKASSSDDEGGPRTLGGDGHRAEEASKDKE
CACGGCGTCTGGAATGCAGGATGAGGTCAGAGCGGTTGGCGAGGAGCAAAGGTCAGAGGAGCCAAAGCGCAGGGTGGATACTTCAGTGTCTTGGGAGGCGTTGATTTGTGTCGGATCGTCCAAGAAGAGAGCGAGGAAGG	CACGGCGCCTGGAATGCAGGATGAGGTCAGAGCGGTTGGCGAGGAGCAAAGGTCAGAGGAGCCAAAGCGCAGGGTGGATACTTCAGTGTCTTGGGAGGCGTTGATTTGTGTCGGATCGTCCAAGAAGAGAGCGAGGAAGG	9	WT	VKSATLSSTESTASGMQDEVRAVGEEQRSEEPKRRVDTSVSWEALICVGSSKKRARKASSSDDEGGPRTLGGDGHRAEEASKDKE	VKSATLSSTESTASGMQDEVRAVGEEQRSEEPKRRVDTSVSWEALICVGSSKKRARKASSSDDEGGPRTLGGDGHRAEEASKDKE
CACGGCGTCTGGAATGCAGGATGAGGTCAGAGCGGTTGGCGAGGAGCAAAGGTCAGAGGAGCCAAAGCGCAGGGTGGATACTTCAGTGTCTTGGGAGGCGTTGATTTGTGTCGGATCGTCCAAGAAGAGAGCGAGGAAGG	CACGGCGTCTGGAATGCAGGGTGAGGTCAGAGCGGTTGGCGAGGAGCAAAGGTCAGAGGAGCCAAAGCGCAGGGTGGATACTTCAGTGTCTTGGGAGGCGTTGATTTGTGTCGGATCGTCCAAGAAGAGAGCGAGGAAGG	8	WT	VKSATLSSTESTASGMQDEVRAVGEEQRSEEPKRRVDTSVSWEALICVGSSKKRARKASSSDDEGGPRTLGGDGHRAEEASKDKE	VKSATLSSTESTASGMQDEVRAVGEEQRSEEPKRRVDTSVSWEALICVGSSKKRARKASSSDDEGGPRTLGGDGHRAEEASKDKE
CACGGCGTCTGGAATGCAGGATGAGGTCAGAGCGGTTGGCGAGGAGCAAAGGTCAGAGGAGCCAAAGCGCAGGGTGGATACTTCAGTGTCTTGGGAGGCGTTGATTTGTGTCGGATCGTCCAAGAAGAGAGCGAGGAAGG	CACGGCGTCTGGAATGCAGGATGAGGTCAGAGCGGTTGGCGAGGAGCAAAGGTCAGAGGAGCCAAAGCGCAGGGTGGATACTTCAGTGTCTTGGGAGGCGTTGATTTGTGTCGGATCGTCCAAGAGGAGAGCGAGGAAGG	8	WT	VKSATLSSTESTASGMQDEVRAVGEEQRSEEPKRRVDTSVSWEALICVGSSKKRARKASSSDDEGGPRTLGGDGHRAEEASKDKE	VKSATLSSTESTASGMQDEVRAVGEEQRSEEPKRRVDTSVSWEALICVGSSKKRARKASSSDDEGGPRTLGGDGHRAEEASKDKE
CACGGCGTCTGGAATGCAGGATGAGGTCAGAGCGGTTGGCGAGGAGCAAAGGTCAGAGGAGCCAAAGCGCAGGGTGGATACTTCAGTGTCTTGGGAGGCGTTGATTTGTGTCGGATCGTCCAAGAAGAGAGCGAGGAAGG	CACGGCGTCTGGAATGCAGGATGAGGTCAGAGCGGTTGGCGAGGAGCAAAGGTCAGAGGAGCCAAAGCGCAGGGTGGATACTTCAGTGTCTTGGGAGGCGTTGATTTGTGTCGGATCGTCCAAGGAGAGAGCGAGGAAGG	7	WT	VKSATLSSTESTASGMQDEVRAVGEEQRSEEPKRRVDTSVSWEALICVGSSKKRARKASSSDDEGGPRTLGGDGHRAEEASKDKE	VKSATLSSTESTASGMQDEVRAVGEEQRSEEPKRRVDTSVSWEALICVGSSKKRARKASSSDDEGGPRTLGGDGHRAEEASKDKE
CACGGCGTCTGGAATGCAGGATGAGGTCAGAGCGGTTGGCGAGGAGCAAAGGTCAGAGGAGCCAAAGCGCAGGGTGGATACTTCAGTGTCTTGGGAGGCGTTGATTTGTGTCGGATCGTCCAAGAAGAGAGCGAGGAAGG	CACGGCGTCTGGAATGCAGGATGAGGTCAGAGCGGTTGGCGAGGAGCAAAGGTCAGAGGAGCCAAAGCGCAGGGTGGATACTTCAGTGTCTTGGGAGGCGTTGATTTGCGTCGGATCGTCCAAGAAGAGAGCGAGGAAGG	7	WT	VKSATLSSTESTASGMQDEVRAVGEEQRSEEPKRRVDTSVSWEALICVGSSKKRARKASSSDDEGGPRTLGGDGHRAEEASKDKE	VKSATLSSTESTASGMQDEVRAVGEEQRSEEPKRRVDTSVSWEALICVGSSKKRARKASSSDDEGGPRTLGGDGHRAEEASKDKE
CACGGCGTCTGGAATGCAGGATGAGGTCAGAGCGGTTGGCGAGGAGCAAAGGTCAGAGGAGCCAAAGCGCAGGGTGGATACTTCAGTGTCTTGGGAGGCGTTGATTTGTGTCGGATCGTCCAAGAAGAGAGCGAGGAAGG	CACGGCGTCTGGAATGCAGGATGAGGTCAGGGCGGTTGGCGAGGAGCAAAGGTCAGAGGAGCCAAAGCGCAGGGTGGATACTTCAGTGTCTTGGGAGGCGTTGATTTGTGTCGGATCGTCCAAGAAGAGAGCGAGGAAGG	6	WT	VKSATLSSTESTASGMQDEVRAVGEEQRSEEPKRRVDTSVSWEALICVGSSKKRARKASSSDDEGGPRTLGGDGHRAEEASKDKE	VKSATLSSTESTASGMQDEVRAVGEEQRSEEPKRRVDTSVSWEALICVGSSKKRARKASSSDDEGGPRTLGGDGHRAEEASKDKE
CACGGCGTCTGGAATGCAGGATGAGGTCAGAGCGGTTGGCGAGGAGCAAAGGTCAGAGGAGCCAAAGCGCAGGGTGGATACTTCAGTGTCTTGGGAGGCGTTGATTTGTGTCGGATCGTCCAAGAAGAGAGCGAGGAAGG	CACGGCGTCTGGAATGCAGGATGAGGTCAGAGCGGTTGGCGAGGAGCAAAGGTCAGAGGAGCCAAAGCGCAGGGTGGATACTTCAGTGTCTTGGGAGGCGTTGATTTGTGTCGGATCGTCCAAGAAGAGAGCGAGGAGGG	6	WT	VKSATLSSTESTASGMQDEVRAVGEEQRSEEPKRRVDTSVSWEALICVGSSKKRARKASSSDDEGGPRTLGGDGHRAEEASKDKE	VKSATLSSTESTASGMQDEVRAVGEEQRSEEPKRRVDTSVSWEALICVGSSKKRARKASSSDDEGGPRTLGGDGHRAEEASKDKE
CACGGCGTCTGGAATGCAGGATGAGGTCAGAGCGGTTGGCGAGGAGCAAAGGTCAGAGGAGCCAAAGCGCAGGGTGGATACTTCAGTGTCTTGGGAGGCGTTGATTTGTGTCGGATCGTCCAAGAAGAGAGCGAGGAAGG	CACGGCGTCTGGAATGCAGGATGAGGTCAGAGCGGTTGGCGAGGAGCAAAGGTCAGAGGAGCCAAAGCGCAGGGTGGGTACTTCAGTGTCTTGGGAGGCGTTGATTTGTGTCGGATCGTCCAAGAAGAGAGCGAGGAAGG	6	WT	VKSATLSSTESTASGMQDEVRAVGEEQRSEEPKRRVDTSVSWEALICVGSSKKRARKASSSDDEGGPRTLGGDGHRAEEASKDKE	VKSATLSSTESTASGMQDEVRAVGEEQRSEEPKRRVDTSVSWEALICVGSSKKRARKASSSDDEGGPRTLGGDGHRAEEASKDKE
CACGGCGTCTGGAATGCAGGATGAGGTCAGAGCGGTTGGCGAGGAGCAAAGGTCAGAGGAGCCAAAGCGCAGGGTGGATACTTCAGTGTCTTGGGAGGCGTTGATTTGTGTCGGATCGTCCAAGAAGAGAGCGAGGAAGG	CACGGCGTCTGGAATGCAGGATGAGGTCAGAGCGGTTGGCGAGGAGCAAAGGTCAGAGGAGCCAAAGCGCAGGGTTGATACTTCAGTGTCTTGGGAGGCGTTGATTTGTGTCGGATCGTCCAAGAAGAGAGCGAGGAAGG	6	WT	VKSATLSSTESTASGMQDEVRAVGEEQRSEEPKRRVDTSVSWEALICVGSSKKRARKASSSDDEGGPRTLGGDGHRAEEASKDKE	VKSATLSSTESTASGMQDEVRAVGEEQRSEEPKRRVDTSVSWEALICVGSSKKRARKASSSDDEGGPRTLGGDGHRAEEASKDKE
CACGGCGTCTGGAATGCAGGATGAGGTCAGAGCGGTTGGCGAGGAGCAAAGGTCAGAGGAGCCAAAGCGCAGGGTGGATACTTCAGTGTCTTGGGAGGCGTTGATTTGTGTCGGATCGTCCAAGAAGAGAGCGAGGAAGG	CACGGCGTCTGGAATGCAGGATGAGGTCAGAGCGGTTGGCGAGGAGCAAAGGTCAGAGGAGCCAAAGCGCAGGGTGGATACTTCAGTGTCTTGGGAGGCGTTGATTTGTGTCGGATCGCCCAAGAAGAGAGCGAGGAAGG	6	WT	VKSATLSSTESTASGMQDEVRAVGEEQRSEEPKRRVDTSVSWEALICVGSSKKRARKASSSDDEGGPRTLGGDGHRAEEASKDKE	VKSATLSSTESTASGMQDEVRAVGEEQRSEEPKRRVDTSVSWEALICVGSSKKRARKASSSDDEGGPRTLGGDGHRAEEASKDKE
CACGGCGTCTGGAATGCAGGATGAGGTCAGAGCGGTTGGCGAGGAGCAAAGGTCAGAGGAGCCAAAGCGCAGGGTGGATACTTCAGTGTCTTGGGAGGCGTTGATTTGTGTCGGATCGTCCAAGAAGAGAGCGAGGAAGG	CACGGCGTCTGGAATGCAGGATGAGGTCAGAGCGGTTGGCGAGGAGCAAAGGTCAGAGGGGCCAAAGCGCAGGGTGGATACTTCAGTGTCTTGGGAGGCGTTGATTTGTGTCGGATCGTCCAAGAAGAGAGCGAGGAAGG	6	WT	VKSATLSSTESTASGMQDEVRAVGEEQRSEEPKRRVDTSVSWEALICVGSSKKRARKASSSDDEGGPRTLGGDGHRAEEASKDKE	VKSATLSSTESTASGMQDEVRAVGEEQRSEEPKRRVDTSVSWEALICVGSSKKRARKASSSDDEGGPRTLGGDGHRAEEASKDKE
CACGGCGTCTGGAATGCAGGATGAGGTCAGAGCGGTTGGCGAGGAGCAAAGGTCAGAGGAGCCAAAGCGCAGGGTGGATACTTCAGTGTCTTGGGAGGCGTTGATTTGTGTCGGATCGTCCAAGAAGAGAGCGAGGAAGG	CACGGCGTCTGGAATGCAGGATGAGGTCAGAGCGGTTGGCGAGGAGCAAAGGTCAGGGGAGCCAAAGCGCAGGGTGGATACTTCAGTGTCTTGGGAGGCGTTGATTTGTGTCGGATCGTCCAAGAAGAGAGCGAGGAAGG	5	WT	VKSATLSSTESTASGMQDEVRAVGEEQRSEEPKRRVDTSVSWEALICVGSSKKRARKASSSDDEGGPRTLGGDGHRAEEASKDKE	VKSATLSSTESTASGMQDEVRAVGEEQRSEEPKRRVDTSVSWEALICVGSSKKRARKASSSDDEGGPRTLGGDGHRAEEASKDKE
CACGGCGTCTGGAATGCAGGATGAGGTCAGAGCGGTTGGCGAGGAGCAAAGGTCAGAGGAGCCAAAGCGCAGGGTGGATACTTCAGTGTCTTGGGAGGCGTTGATTTGTGTCGGATCGTCCAAGAAGAGAGCGAGGAAGG	CACGGCGTCTGGAATGCAGGATGAGGTCAGAGCGGTTGGCGAGGAGCAAAGGTCGGAGGAGCCAAAGCGCAGGGTGGATACTTCAGTGTCTTGGGAGGCGTTGATTTGTGTCGGATCGTCCAAGAAGAGAGCGAGGAAGG	5	WT	VKSATLSSTESTASGMQDEVRAVGEEQRSEEPKRRVDTSVSWEALICVGSSKKRARKASSSDDEGGPRTLGGDGHRAEEASKDKE	VKSATLSSTESTASGMQDEVRAVGEEQRSEEPKRRVDTSVSWEALICVGSSKKRARKASSSDDEGGPRTLGGDGHRAEEASKDKE
CACGGCGTCTGGAATGCAGGATGAGGTCAGAGCGGTTGGCGAGGAGCAAAGGTCAGAGGAGCCAAAGCGCAGGGTGGATACTTCAGTGTCTTGGGAGGCGTTGATTTGTGTCGGATCGTCCAAGAAGAGAGCGAGGAAGG	CACGGCGTCTGGAATGCAGGATGAGGTCAGAGCGGTTGGCGAGGAGCAAAGGTCAGAGGAGCCAAGGCGCAGGGTGGATACTTCAGTGTCTTGGGAGGCGTTGATTTGTGTCGGATCGTCCAAGAAGAGAGCGAGGAAGG	5	WT	VKSATLSSTESTASGMQDEVRAVGEEQRSEEPKRRVDTSVSWEALICVGSSKKRARKASSSDDEGGPRTLGGDGHRAEEASKDKE	VKSATLSSTESTASGMQDEVRAVGEEQRSEEPKRRVDTSVSWEALICVGSSKKRARKASSSDDEGGPRTLGGDGHRAEEASKDKE
CACGGCGTCTGGAATGCAGGATGAGGTCAGAGCGGTTGGCGAGGAGCAAAGGTCAGAGGAGCCAAAGCGCAGGGTGGATACTTCAGTGTCTTGGGAGGCGTTGATTTGTGTCGGATCGTCCAAGAAGAGAGCGAGGAAGG	CACGGCGTCTGGAATGCAGGATGAGGTCAGAGCGGTTGGCGAGGAGCAAAGGTCAGAGGAGCCAAAGCGCAGGGTGGATACTTCAGTGTCTTGGAAGGCGTTGATTTGTGTCGGATCGTCCAAGAAGAGAGCGAGGAAGG	5	WT	VKSATLSSTESTASGMQDEVRAVGEEQRSEEPKRRVDTSVSWEALICVGSSKKRARKASSSDDEGGPRTLGGDGHRAEEASKDKE	VKSATLSSTESTASGMQDEVRAVGEEQRSEEPKRRVDTSVSWEALICVGSSKKRARKASSSDDEGGPRTLGGDGHRAEEASKDKE
CACGGCGTCTGGAATGCAGGATGAGGTCAGAGCGGTTGGCGAGGAGCAAAGGTCAGAGGAGCCAAAGCGCAGGGTGGATACTTCAGTGTCTTGGGAGGCGTTGATTTGTGTCGGATCGTCCAAGAAGAGAGCGAGGAAGG	CACGGCGTCTGGAATGCAGGATGAGGTCAGAGCGGTTGGCGAGGAGCAAAGGCCAGAGGAGCCAAAGCGCAGGGTGGATACTTCAGTGTCTTGGGAGGCGTTGATTTGTGTCGGATCGTCCAAGAAGAGAGCGAGGAAGG	5	WT	VKSATLSSTESTASGMQDEVRAVGEEQRSEEPKRRVDTSVSWEALICVGSSKKRARKASSSDDEGGPRTLGGDGHRAEEASKDKE	VKSATLSSTESTASGMQDEVRAVGEEQRSEEPKRRVDTSVSWEALICVGSSKKRARKASSSDDEGGPRTLGGDGHRAEEASKDKE
CACGGCGTCTGGAATGCAGGATGAGGTCAGAGCGGTTGGCGAGGAGCAAAGGTCAGAGGAGCCAAAGCGCAGGGTGGATACTTCAGTGTCTTGGGAGGCGTTGATTTGTGTCGGATCGTCCAAGAAGAGAGCGAGGAAGG	CACGGCGTCTGGACTGCAGGATGAGGTCAGAGCGGTTGGCGAGGAGCAAAGGTCAGAGGAGCCAAAGCGCAGGGTGGATACTTCAGTGTCTTGGGAGGCGTTGATTTGTGTCGGATCGTCCAAGAAGAGAGCGAGGAAGG	4	WT	VKSATLSSTESTASGMQDEVRAVGEEQRSEEPKRRVDTSVSWEALICVGSSKKRARKASSSDDEGGPRTLGGDGHRAEEASKDKE	VKSATLSSTESTASGMQDEVRAVGEEQRSEEPKRRVDTSVSWEALICVGSSKKRARKASSSDDEGGPRTLGGDGHRAEEASKDKE
CACGGCGTCTGGAATGCAGGATGAGGTCAGAGCGGTTGGCGAGGAGCAAAGGTCAGAGGAGCCAAAGCGCAGGGTGGATACTTCAGTGTCTTGGGAGGCGTTGATTTGTGTCGGATCGTCCAAGAAGAGAGCGAGGAAGG	CACGGCGTCTGGAATGCAGGATGAGGTCAGAGCGGTTGGCGAGGAGCAAAGGTCAGAGGAGCCGAAGCGCAGGGTGGATACTTCAGTGTCTTGGGAGGCGTTGATTTGTGTCGGATCGTCCAAGAAGAGAGCGAGGAAGG	4	WT	VKSATLSSTESTASGMQDEVRAVGEEQRSEEPKRRVDTSVSWEALICVGSSKKRARKASSSDDEGGPRTLGGDGHRAEEASKDKE	VKSATLSSTESTASGMQDEVRAVGEEQRSEEPKRRVDTSVSWEALICVGSSKKRARKASSSDDEGGPRTLGGDGHRAEEASKDKE
CACGGCGTCTGGAATGCAGGATGAGGTCAGAGCGGTTGGCGAGGAGCAAAGGTCAGAGGAGCCAAAGCGCAGGGTGGATACTTCAGTGTCTTGGGAGGCGTTGATTTGTGTCGGATCGTCCAAGAAGAGAGCGAGGAAGG	CACGGCGTCTGGAATGCAGGATGAGGTCAGAGCGGTTGGCGAGGAGCAAAGGTCAAAGGAGCCAAAGCGCAGGGTGGATACTGCAGTGGCTTGGGAGGCGTTGATTTGTGTCGGATCGTCCAAGAAGAGAGCGAGGAAGG	4	WT	VKSATLSSTESTASGMQDEVRAVGEEQRSEEPKRRVDTSVSWEALICVGSSKKRARKASSSDDEGGPRTLGGDGHRAEEASKDKE	VKSATLSSTESTASGMQDEVRAVGEEQRSEEPKRRVDTSVSWEALICVGSSKKRARKASSSDDEGGPRTLGGDGHRAEEASKDKE
CACGGCGTCTGGAATGCAGGATGAGGTCAGAGCGGTTGGCGAGGAGCAAAGGTCAGAGGAGCCAAAGCGCAGGGTGGATACTTCAGTGTCTTGGGAGGCGTTGATTTGTGTCGGATCGTCCAAGAAGAGAGCGAGGAAGG	CACGGCGTCTGGAATGCAGGATGAGGTCAGAGCGGTTGGCGAGGAGCAAAGGTCAGAGGAGCCAAAGCGCAGGGTGGATACTTCAGTGTCTTGGGAGGCGTTGATTTGTGTCGGATCGTCCAAGAAGAGAACGAGGAAGG	4	WT	VKSATLSSTESTASGMQDEVRAVGEEQRSEEPKRRVDTSVSWEALICVGSSKKRARKASSSDDEGGPRTLGGDGHRAEEASKDKE	VKSATLSSTESTASGMQDEVRAVGEEQRSEEPKRRVDTSVSWEALICVGSSKKRARKASSSDDEGGPRTLGGDGHRAEEASKDKE
CACGGCGTCTGGAATGCAGGATGAGGTCAGAGCGGTTGGCGAGGAGCAAAGGTCAGAGGAGCCAAAGCGCAGGGTGGATACTTCAGTGTCTTGGGAGGCGTTGATTTGTGTCGGATCGTCCAAGAAGAGAGCGAGGAAGG	CACGGCGTCTGGAATGCAGGATGAGGTCAGAGCGGTTGGCGAGGAGCAAAGGTCAGAGGAGCCAAAGCGCAGGGTGGATACCTCAGTGTCTTGGGAGGCGTTGATTTGTGTCGGATCGTCCAAGAAGAGAGCGAGGAAGG	4	WT	VKSATLSSTESTASGMQDEVRAVGEEQRSEEPKRRVDTSVSWEALICVGSSKKRARKASSSDDEGGPRTLGGDGHRAEEASKDKE	VKSATLSSTESTASGMQDEVRAVGEEQRSEEPKRRVDTSVSWEALICVGSSKKRARKASSSDDEGGPRTLGGDGHRAEEASKDKE
CACGGCGTCTGGAATGCAGGATGAGGTCAGAGCGGTTGGCGAGGAGCAAAGGTCAGAGGAGCCAAAGCGCAGGGTGGATACTTCAGTGTCTTGGGAGGCGTTGATTTGTGTCGGATCGTCCAAGAAGAGAGCGAGGAAGG	CACGGCGTCTGGAATGCAGGATGAGGTCAGAGCGGTTGGCGAGGAGCAAAGGTCAGAGGAGCCAAAGCGCAGGGTGGATACTTCAGTGTCTTGGGAGGCGTTGATTTGTGTCGGATCGTCCAAGAAGAGAGCGAGGAAGA	4	WT	VKSATLSSTESTASGMQDEVRAVGEEQRSEEPKRRVDTSVSWEALICVGSSKKRARKASSSDDEGGPRTLGGDGHRAEEASKDKE	VKSATLSSTESTASGMQDEVRAVGEEQRSEEPKRRVDTSVSWEALICVGSSKKRARKASSSDDEGGPRTLGGDGHRAEEASKDKE
CACGGCGTCTGGAATGCAGGATGAGGTCAGAGCGGTTGGCGAGGAGCAAAGGTCAGAGGAGCCAAAGCGCAGGGTGGATACTTCAGTGTCTTGGGAGGCGTTGATTTGTGTCGGATCGTCCAAGAAGAGAGCGAGGAAGG	CACGGCGTCTGGAATGCAGGATGAGGTCAGAGCGGTTGGCGAGGAGCAAAGGTCAGAGGAGCCAAAGCGCAGGGTGGACACTTCAGTGTCTTGGGAGGCGTTGATTTGTGTCGGATCGTCCAAGAAGAGAGCGAGGAAGG	4	WT	VKSATLSSTESTASGMQDEVRAVGEEQRSEEPKRRVDTSVSWEALICVGSSKKRARKASSSDDEGGPRTLGGDGHRAEEASKDKE	VKSATLSSTESTASGMQDEVRAVGEEQRSEEPKRRVDTSVSWEALICVGSSKKRARKASSSDDEGGPRTLGGDGHRAEEASKDKE
CACGGCGTCTGGAATGCAGGATGAGGTCAGAGCGGTTGGCGAGGAGCAAAGGTCAGAGGAGCCAAAGCGCAGGGTGGATACTTCAGTGTCTTGGGAGGCGTTGATTTGTGTCGGATCGTCCAAGAAGAGAGCGAGGAAGG	CACGGCGTCTGGAATGCAGGATGAGGTCAGAGCGGTTGGCGAGGAGCAAAGGTCAGAGGAGCCAAAGCGCAGGGTGGATACTTCAGTGTCTTGGGAGGCGTCGATTTGTGTCGGATCGTCCAAGAAGAGAGCGAGGAAGG	4	WT	VKSATLSSTESTASGMQDEVRAVGEEQRSEEPKRRVDTSVSWEALICVGSSKKRARKASSSDDEGGPRTLGGDGHRAEEASKDKE	VKSATLSSTESTASGMQDEVRAVGEEQRSEEPKRRVDTSVSWEALICVGSSKKRARKASSSDDEGGPRTLGGDGHRAEEASKDKE
CACGGCGTCTGGAATGCAGGATGAGGTCAGAGCGGTTGGCGAGGAGCAAAGGTCAGAGGAGCCAAAGCGCAGGGTGGATACTTCAGTGTCTTGGGAGGCGTTGATTTGTGTCGGATCGTCCAAGAAGAGAGCGAGGAAGG	CACAGCGTCTGGAATGCAGGATGAGGTCAGAGCGGTTGGCGAGGAGCAAAGGTCAGAGGAGCCAAAGCGCAGGGTGGATACTTCAGTGTCTTGGGAGGCGTTGATTTGTGTCGGATCGTCCAAGAAGAGAGCGAGGAAGG	4	WT	VKSATLSSTESTASGMQDEVRAVGEEQRSEEPKRRVDTSVSWEALICVGSSKKRARKASSSDDEGGPRTLGGDGHRAEEASKDKE	VKSATLSSTESTASGMQDEVRAVGEEQRSEEPKRRVDTSVSWEALICVGSSKKRARKASSSDDEGGPRTLGGDGHRAEEASKDKE
CACGGCGTCTGGAATGCAGGATGAGGTCAGAGCGGTTGGCGAGGAGCAAAGGTCAGAGGAGCCAAAGCGCAGGGTGGATACTTCAGTGTCTTGGGAGGCGTTGATTTGTGTCGGATCGTCCAAGAAGAGAGCGAGGAAGG	CACGGCGTCTGGAATGCAGGATGAGGTCAGAGCGGTTGGCGAGGAGCAAAGGTCAGAGGAGCCAAAGCGCAGGGTGGATACTTCAGTGTCTTGGGGGGCGTTGATTTGTGTCGGATCGTCCAAGAAGAGAGCGAGGAAGG	4	WT	VKSATLSSTESTASGMQDEVRAVGEEQRSEEPKRRVDTSVSWEALICVGSSKKRARKASSSDDEGGPRTLGGDGHRAEEASKDKE	VKSATLSSTESTASGMQDEVRAVGEEQRSEEPKRRVDTSVSWEALICVGSSKKRARKASSSDDEGGPRTLGGDGHRAEEASKDKE
CACGGCGTCTGGAATGCAGGATGAGGTCAGAGCGGTTGGCGAGGAGCAAAGGTCAGAGGAGCCAAAGCGCAGGGTGGATACTTCAGTGTCTTGGGAGGCGTTGATTTGTGTCGGATCGTCCAAGAAGAGAGCGAGGAAGG	CACGGCGTCTGGAATGCAGGATGAGGTCAGAGCGGTTGGCGAGGAGCAAAGGTCAGAGGAGCCAAAGCGTAGGGTGGATACTTCAGTGTCTTGGGAGGCGTTGATTTGTGTCGGATCGTCCAAGAAGAGAGCGAGGAAGG	4	WT	VKSATLSSTESTASGMQDEVRAVGEEQRSEEPKRRVDTSVSWEALICVGSSKKRARKASSSDDEGGPRTLGGDGHRAEEASKDKE	VKSATLSSTESTASGMQDEVRAVGEEQRSEEPKRRVDTSVSWEALICVGSSKKRARKASSSDDEGGPRTLGGDGHRAEEASKDKE
CACGGCGTCTGGAATGCAGGATGAGGTCAGAGCGGTTGGCGAGGAGCAAAGGTCAGAGGAGCCAAAGCGCAGGGTGGATACTTCAGTGTCTTGGGAGGCGTTGATTTGTGTCGGATCGTCCAAGAAGAGAGCGAGGAAGG	CACGGCGTCTGGAATGCAGGATGAGGTCAGAGCGGTTGGCGAGGAGCAAAGGTCAGAGGAGCCAAAGCGCAGGGTGGATGCTGCAGTGGCTTGGGAGGCGTTGATTTGTGTCGGATCGTCCAAGAAGAGAGCGAGGAAGG	4	Base Change	VKSATLSSTESTASGMQDEVRAVGEEQRSEEPKRRVDAAVAWEALICVGSSKKRARKASSSDDEGGPRTLGGDGHRAEEASKDKE
CACGGCGTCTGGAATGCAGGATGAGGTCAGAGCGGTTGGCGAGGAGCAAAGGTCAGAGGAGCCAAAGCGCAGGGTGGATACTTCAGTGTCTTGGGAGGCGTTGATTTGTGTCGGATCGTCCAAGAAGAGAGCGAGGAAGG	CACGGCGTCTGGAATGCGGGATGAGGTCAGAGCGGTTGGCGAGGAGCAAAGGTCAGAGGAGCCAAAGCGCAGGGTGGATACTTCAGTGTCTTGGGAGGCGTTGATTTGTGTCGGATCGTCCAAGAAGAGAGCGAGGAAGG	3	WT	VKSATLSSTESTASGMQDEVRAVGEEQRSEEPKRRVDTSVSWEALICVGSSKKRARKASSSDDEGGPRTLGGDGHRAEEASKDKE	VKSATLSSTESTASGMQDEVRAVGEEQRSEEPKRRVDTSVSWEALICVGSSKKRARKASSSDDEGGPRTLGGDGHRAEEASKDKE
CACGGCGTCTGGAATGCAGGATGAGGTCAGAGCGGTTGGCGAGGAGCAAAGGTCAGAGGAGCCAAAGCGCAGGGTGGATACTTCAGTGTCTTGGGAGGCGTTGATTTGTGTCGGATCGTCCAAGAAGAGAGCGAGGAAGG	CACGGCGTCTGGAATGCAGGATGAGGTCAGAGCGGTTGGCGGGGAGCAAAGGTCAGAGGAGCCAAAGCGCAGGGTGGATACTTCAGTGTCTTGGGAGGCGTTGATTTGTGTCGGATCGTCCAAGAAGAGAGCGAGGAAGG	3	WT	VKSATLSSTESTASGMQDEVRAVGEEQRSEEPKRRVDTSVSWEALICVGSSKKRARKASSSDDEGGPRTLGGDGHRAEEASKDKE	VKSATLSSTESTASGMQDEVRAVGEEQRSEEPKRRVDTSVSWEALICVGSSKKRARKASSSDDEGGPRTLGGDGHRAEEASKDKE
CACGGCGTCTGGAATGCAGGATGAGGTCAGAGCGGTTGGCGAGGAGCAAAGGTCAGAGGAGCCAAAGCGCAGGGTGGATACTTCAGTGTCTTGGGAGGCGTTGATTTGTGTCGGATCGTCCAAGAAGAGAGCGAGGAAGG	CACGGCGTCTGGAATGCAGGATGAGGTCAGAGCGGTTGGCGAGGAGCAAAGGTCAGAGGAGCCAAAGCGCAGGGTGGATACTTCAGTGTCTTGGGAGGCGTTGATTTGTGTCGGATCATCCAAGAAGAGAGCGAGGAAGG	3	WT	VKSATLSSTESTASGMQDEVRAVGEEQRSEEPKRRVDTSVSWEALICVGSSKKRARKASSSDDEGGPRTLGGDGHRAEEASKDKE	VKSATLSSTESTASGMQDEVRAVGEEQRSEEPKRRVDTSVSWEALICVGSSKKRARKASSSDDEGGPRTLGGDGHRAEEASKDKE
CACGGCGTCTGGAATGCAGGATGAGGTCAGAGCGGTTGGCGAGGAGCAAAGGTCAGAGGAGCCAAAGCGCAGGGTGGATACTTCAGTGTCTTGGGAGGCGTTGATTTGTGTCGGATCGTCCAAGAAGAGAGCGAGGAAGG	CACGGCGTCTGGAATGCAGGATGAGGTCAGAGCGGTTAGCGAGGAGCAAAGGTCAGAGGAGCCAAAGCGCAGGGTGGATACTTCAGTGTCTTGGGAGGCGTTGATTTGTGTCGGATCGTCCAAGAAGAGAGCGAGGAAGG	3	WT	VKSATLSSTESTASGMQDEVRAVGEEQRSEEPKRRVDTSVSWEALICVGSSKKRARKASSSDDEGGPRTLGGDGHRAEEASKDKE	VKSATLSSTESTASGMQDEVRAVGEEQRSEEPKRRVDTSVSWEALICVGSSKKRARKASSSDDEGGPRTLGGDGHRAEEASKDKE
CACGGCGTCTGGAATGCAGGATGAGGTCAGAGCGGTTGGCGAGGAGCAAAGGTCAGAGGAGCCAAAGCGCAGGGTGGATACTTCAGTGTCTTGGGAGGCGTTGATTTGTGTCGGATCGTCCAAGAAGAGAGCGAGGAAGG	CACGGCGTCTGGAATGCAGGATGAGGTCAGAGCGGTTGGCGAGGAGCAAAGGTCAGAGGAGCCAAAGCGCAGGGTGGATACTTCAGTGTCTTGGGAGGCGTTGACTTGTGTCGGATCGTCCAAGAAGAGAGCGAGGAAGG	3	WT	VKSATLSSTESTASGMQDEVRAVGEEQRSEEPKRRVDTSVSWEALICVGSSKKRARKASSSDDEGGPRTLGGDGHRAEEASKDKE	VKSATLSSTESTASGMQDEVRAVGEEQRSEEPKRRVDTSVSWEALICVGSSKKRARKASSSDDEGGPRTLGGDGHRAEEASKDKE
CACGGCGTCTGGAATGCAGGATGAGGTCAGAGCGGTTGGCGAGGAGCAAAGGTCAGAGGAGCCAAAGCGCAGGGTGGATACTTCAGTGTCTTGGGAGGCGTTGATTTGTGTCGGATCGTCCAAGAAGAGAGCGAGGAAGG	CACGGCGTCTGGAATGCAGGATGAGGTCAGAGCGGTCGGCGAGGAGCAAAGGTCAGAGGAGCCAAAGCGCAGGGTGGATACTTCAGTGTCTTGGGAGGCGTTGATTTGTGTCGGATCGTCCAAGAAGAGAGCGAGGAAGG	3	WT	VKSATLSSTESTASGMQDEVRAVGEEQRSEEPKRRVDTSVSWEALICVGSSKKRARKASSSDDEGGPRTLGGDGHRAEEASKDKE	VKSATLSSTESTASGMQDEVRAVGEEQRSEEPKRRVDTSVSWEALICVGSSKKRARKASSSDDEGGPRTLGGDGHRAEEASKDKE
CACGGCGTCTGGAATGCAGGATGAGGTCAGAGCGGTTGGCGAGGAGCAAAGGTCAGAGGAGCCAAAGCGCAGGGTGGATACTTCAGTGTCTTGGGAGGCGTTGATTTGTGTCGGATCGTCCAAGAAGAGAGCGAGGAAGG	CACGGCGTCTGGAATGCAGGATGAGGTCAGAGCGGTTGGCGAGGAGCAAAGGTCAGAGGAGCCAAAGCGCAGGGTGGATACTTCAGTGTCCTGGGAGGCGTTGATTTGTGTCGGATCGTCCAAGAAGAGAGCGAGGAAGG	3	WT	VKSATLSSTESTASGMQDEVRAVGEEQRSEEPKRRVDTSVSWEALICVGSSKKRARKASSSDDEGGPRTLGGDGHRAEEASKDKE	VKSATLSSTESTASGMQDEVRAVGEEQRSEEPKRRVDTSVSWEALICVGSSKKRARKASSSDDEGGPRTLGGDGHRAEEASKDKE
CACGGCGTCTGGAATGCAGGATGAGGTCAGAGCGGTTGGCGAGGAGCAAAGGTCAGAGGAGCCAAAGCGCAGGGTGGATACTTCAGTGTCTTGGGAGGCGTTGATTTGTGTCGGATCGTCCAAGAAGAGAGCGAGGAAGG	CACGGCGTCTGGAATGCAGGATGAGGTCGGAGCGGTTGGCGAGGAGCAAAGGTCAGAGGAGCCCAAGCGCAGGGTGGATACTTCAGTGTCTTGGGAGGCGTTGATTTGTGTCGGATCGTCCAAGAAGAGAGCGAGGAAGG	3	WT	VKSATLSSTESTASGMQDEVRAVGEEQRSEEPKRRVDTSVSWEALICVGSSKKRARKASSSDDEGGPRTLGGDGHRAEEASKDKE	VKSATLSSTESTASGMQDEVRAVGEEQRSEEPKRRVDTSVSWEALICVGSSKKRARKASSSDDEGGPRTLGGDGHRAEEASKDKE
CACGGCGTCTGGAATGCAGGATGAGGTCAGAGCGGTTGGCGAGGAGCAAAGGTCAGAGGAGCCAAAGCGCAGGGTGGATACTTCAGTGTCTTGGGAGGCGTTGATTTGTGTCGGATCGTCCAAGAAGAGAGCGAGGAAGG	CACGGCGTCTGGAATGCAGGATGAGGTCAGAGCGGTTGGCGAGGGGCAAAGGTCAGAGGAGCCAAAGCGCAGGGTGGATACTTCAGTGTCTTGGGAGGCGTTGATTTGTGTCGGATCGTCCAAGAAGAGAGCGAGGAAGG	3	WT	VKSATLSSTESTASGMQDEVRAVGEEQRSEEPKRRVDTSVSWEALICVGSSKKRARKASSSDDEGGPRTLGGDGHRAEEASKDKE	VKSATLSSTESTASGMQDEVRAVGEEQRSEEPKRRVDTSVSWEALICVGSSKKRARKASSSDDEGGPRTLGGDGHRAEEASKDKE
CACGGCGTCTGGAATGCAGGATGAGGTCAGAGCGGTTGGCGAGGAGCAAAGGTCAGAGGAGCCAAAGCGCAGGGTGGATACTTCAGTGTCTTGGGAGGCGTTGATTTGTGTCGGATCGTCCAAGAAGAGAGCGAGGAAGG	CACGGCGTCTGGAATGCAGGATGAGGTCAGAGCGGTTGGCGAGGAGCAAAGGTCAGAGGAGCCAAAGCGCAGGGTGGATACTGCAGTGGCTTGGGAGGCGTTGATTTGTGTCGGATCGTCCAAGAAGAGAGCGAGGAAGA	3	WT	VKSATLSSTESTASGMQDEVRAVGEEQRSEEPKRRVDTSVSWEALICVGSSKKRARKASSSDDEGGPRTLGGDGHRAEEASKDKE	VKSATLSSTESTASGMQDEVRAVGEEQRSEEPKRRVDTSVSWEALICVGSSKKRARKASSSDDEGGPRTLGGDGHRAEEASKDKE
CACGGCGTCTGGAATGCAGGATGAGGTCAGAGCGGTTGGCGAGGAGCAAAGGTCAGAGGAGCCAAAGCGCAGGGTGGATACTTCAGTGTCTTGGGAGGCGTTGATTTGTGTCGGATCGTCCAAGAAGAGAGCGAGGAAGG	CACGGCGTCTGGAATGCAGGATGAGGTCAGAGCGGTTGGCGAGGAGCAAAGGTCAGAGGAGCCAAAGCGCAGGGTGGATACTTCAGTGGCTTGGGAGGCGTTGATTTGTGTCGGAGCGGCCAAGAAGAGAGCGAGGAAGG	3	WT	VKSATLSSTESTASGMQDEVRAVGEEQRSEEPKRRVDTSVSWEALICVGSSKKRARKASSSDDEGGPRTLGGDGHRAEEASKDKE	VKSATLSSTESTASGMQDEVRAVGEEQRSEEPKRRVDTSVSWEALICVGSSKKRARKASSSDDEGGPRTLGGDGHRAEEASKDKE
CACGGCGTCTGGAATGCAGGATGAGGTCAGAGCGGTTGGCGAGGAGCAAAGGTCAGAGGAGCCAAAGCGCAGGGTGGATACTTCAGTGTCTTGGGAGGCGTTGATTTGTGTCGGATCGTCCAAGAAGAGAGCGAGGAAGG	CACGGCGTCTGGAATGCAGGATGAGGTCAGAGCGGTTGGCGAGGAGCAAAGGTCAGAGGAGCCAAAGCGCAGGGTGGATACTTCAGTGTCTTGGGAGGCGTTGATTTGTGCCGGATCGTCCAAGAAGAGAGCGAGGAAGG	3	WT	VKSATLSSTESTASGMQDEVRAVGEEQRSEEPKRRVDTSVSWEALICVGSSKKRARKASSSDDEGGPRTLGGDGHRAEEASKDKE	VKSATLSSTESTASGMQDEVRAVGEEQRSEEPKRRVDTSVSWEALICVGSSKKRARKASSSDDEGGPRTLGGDGHRAEEASKDKE
CACGGCGTCTGGAATGCAGGATGAGGTCAGAGCGGTTGGCGAGGAGCAAAGGTCAGAGGAGCCAAAGCGCAGGGTGGATACTTCAGTGTCTTGGGAGGCGTTGATTTGTGTCGGATCGTCCAAGAAGAGAGCGAGGAAGG	CACGGCGTCTGGAATGCAGGATGAGGTCAGAGCGGTTGGCGAGGAGCAAAGGTTAGAGGAGCCAAAGCGCAGGGTGGATACTTCAGTGTCTTGGGAGGCGTTGATTTGTGTCGGATCGTCCAAGAAGAGAGCGAGGAAGG	3	WT	VKSATLSSTESTASGMQDEVRAVGEEQRSEEPKRRVDTSVSWEALICVGSSKKRARKASSSDDEGGPRTLGGDGHRAEEASKDKE	VKSATLSSTESTASGMQDEVRAVGEEQRSEEPKRRVDTSVSWEALICVGSSKKRARKASSSDDEGGPRTLGGDGHRAEEASKDKE
CACGGCGTCTGGAATGCAGGATGAGGTCAGAGCGGTTGGCGAGGAGCAAAGGTCAGAGGAGCCAAAGCGCAGGGTGGATACTTCAGTGTCTTGGGAGGCGTTGATTTGTGTCGGATCGTCCAAGAAGAGAGCGAGGAAGG	CACGGCGTCTGGAATGCAGGATGAGGTCAGAGCGGTTGGCAAGGAGCAAAGGTCAGAGGAGCCAAAGCGCAGGGTGGATACTTCAGTGTCTTGGGAGGCGTTGATTTGTGTCGGATCGTCCAAGAAGAGAGCGAGGAAGG	3	WT	VKSATLSSTESTASGMQDEVRAVGEEQRSEEPKRRVDTSVSWEALICVGSSKKRARKASSSDDEGGPRTLGGDGHRAEEASKDKE	VKSATLSSTESTASGMQDEVRAVGEEQRSEEPKRRVDTSVSWEALICVGSSKKRARKASSSDDEGGPRTLGGDGHRAEEASKDKE
CACGGCGTCTGGAATGCAGGATGAGGTCAGAGCGGTTGGCGAGGAGCAAAGGTCAGAGGAGCCAAAGCGCAGGGTGGATACTTCAGTGTCTTGGGAGGCGTTGATTTGTGTCGGATCGTCCAAGAAGAGAGCGAGGAAGG	CACGGCGTCTGGAATGCAGGATGAGGTCAGAGCGGCTGGCGAGGAGCAAAGGTCAGAGGAGCCAAAGCGCAGGGTGGATACTTCAGTGTCTTGGGAGGCGTTGATTTGTGTCGGATCGTCCAAGAAGAGAGCGAGGAAGG	3	WT	VKSATLSSTESTASGMQDEVRAVGEEQRSEEPKRRVDTSVSWEALICVGSSKKRARKASSSDDEGGPRTLGGDGHRAEEASKDKE	VKSATLSSTESTASGMQDEVRAVGEEQRSEEPKRRVDTSVSWEALICVGSSKKRARKASSSDDEGGPRTLGGDGHRAEEASKDKE
CACGGCGTCTGGAATGCAGGATGAGGTCAGAGCGGTTGGCGAGGAGCAAAGGTCAGAGGAGCCAAAGCGCAGGGTGGATACTTCAGTGTCTTGGGAGGCGTTGATTTGTGTCGGATCGTCCAAGAAGAGAGCGAGGAAGG	CACGGCGTCTGGAATGCAGGATGAGGTCAGAGCGGTTGGCGAGGAGCAAGGGTCAGAGGAGCCAAAGCGCAGGGTGGATACTTCAGTGTCTTGGGAGGCGTTGATTTGTGTCGGATCGTCCAAGAAGAGAGCGAGGAAGG	3	WT	VKSATLSSTESTASGMQDEVRAVGEEQRSEEPKRRVDTSVSWEALICVGSSKKRARKASSSDDEGGPRTLGGDGHRAEEASKDKE	VKSATLSSTESTASGMQDEVRAVGEEQRSEEPKRRVDTSVSWEALICVGSSKKRARKASSSDDEGGPRTLGGDGHRAEEASKDKE
CACGGCGTCTGGAATGCAGGATGAGGTCAGAGCGGTTGGCGAGGAGCAAAGGTCAGAGGAGCCAAAGCGCAGGGTGGATACTTCAGTGTCTTGGGAGGCGTTGATTTGTGTCGGATCGTCCAAGAAGAGAGCGAGGAAGG	CACGGCGTCTGGAATGCAGGATGAGGTCAGAGCGGTTGGCGAGGAGCAAAGGTCAGAGGAGCCAAAGCGCAGGGTGGATACTTCAGTGTCATGGGAGGCGTTGATTTGTGTCGGATCGTCCAAGGAGAGAGCGAGGAAGG	3	WT	VKSATLSSTESTASGMQDEVRAVGEEQRSEEPKRRVDTSVSWEALICVGSSKKRARKASSSDDEGGPRTLGGDGHRAEEASKDKE	VKSATLSSTESTASGMQDEVRAVGEEQRSEEPKRRVDTSVSWEALICVGSSKKRARKASSSDDEGGPRTLGGDGHRAEEASKDKE
CACGGCGTCTGGAATGCAGGATGAGGTCAGAGCGGTTGGCGAGGAGCAAAGGTCAGAGGAGCCAAAGCGCAGGGTGGATACTTCAGTGTCTTGGGAGGCGTTGATTTGTGTCGGATCGTCCAAGAAGAGAGCGAGGAAGG	CACGGCGTCTGGAATGCAGGATGAGGTCAGAGCGGTTGGCGAGGAGCAAAGGTCAGAGGAGTCAAAGCGCAGGGTGGATACTTCAGTGTCTTGGGAGGCGTTGATTTGTGTCGGATCGTCCAAGAAGAGAGCGAGGAAGG	3	WT	VKSATLSSTESTASGMQDEVRAVGEEQRSEEPKRRVDTSVSWEALICVGSSKKRARKASSSDDEGGPRTLGGDGHRAEEASKDKE	VKSATLSSTESTASGMQDEVRAVGEEQRSEEPKRRVDTSVSWEALICVGSSKKRARKASSSDDEGGPRTLGGDGHRAEEASKDKE
CACGGCGTCTGGAATGCAGGATGAGGTCAGAGCGGTTGGCGAGGAGCAAAGGTCAGAGGAGCCAAAGCGCAGGGTGGATACTTCAGTGTCTTGGGAGGCGTTGATTTGTGTCGGATCGTCCAAGAAGAGAGCGAGGAAGG	CACGGCGTCTGGAATGCAGGATGAGGTCAGAGCGGTTGGCGAGGAGCAAAGGTCAGAGGAGCCAAAGCGCAGGGCGGATACTTCAGTGTCTTGGGAGGCGTTGATTTGTGTCGGATCGTCCAAGAAGAGAGCGAGGAAGG	3	WT	VKSATLSSTESTASGMQDEVRAVGEEQRSEEPKRRVDTSVSWEALICVGSSKKRARKASSSDDEGGPRTLGGDGHRAEEASKDKE	VKSATLSSTESTASGMQDEVRAVGEEQRSEEPKRRVDTSVSWEALICVGSSKKRARKASSSDDEGGPRTLGGDGHRAEEASKDKE
CACGGCGTCTGGAATGCAGGATGAGGTCAGAGCGGTTGGCGAGGAGCAAAGGTCAGAGGAGCCAAAGCGCAGGGTGGATACTTCAGTGTCTTGGGAGGCGTTGATTTGTGTCGGATCGTCCAAGAAGAGAGCGAGGAAGG	CACGGCGTCTGGAATGCAGGATGAGGTCAGAGCGGTTGGCGAGGAGCAAAGGTCAGAGGAGCCAGAGCGCAGGGTGGATACTTCAGTGTCTTGGGAGGCGTTGATTTGTGTCGGATCGTCCAAGAAGAGAGCGAGGAAGG	2	WT	VKSATLSSTESTASGMQDEVRAVGEEQRSEEPKRRVDTSVSWEALICVGSSKKRARKASSSDDEGGPRTLGGDGHRAEEASKDKE	VKSATLSSTESTASGMQDEVRAVGEEQRSEEPKRRVDTSVSWEALICVGSSKKRARKASSSDDEGGPRTLGGDGHRAEEASKDKE
CACGGCGTCTGGAATGCAGGATGAGGTCAGAGCGGTTGGCGAGGAGCAAAGGTCAGAGGAGCCAAAGCGCAGGGTGGATACTTCAGTGTCTTGGGAGGCGTTGATTTGTGTCGGATCGTCCAAGAAGAGAGCGAGGAAGG	CACGGCGTCTGGAATGCAGGATGATGTCAGAGCGGTTGGCGAGGAGCAAAGGTCAGAGGAGCCAAAGCGCAGGGTGGATACTTCAGTGTCTTGGGAGGCGTTGATTTGTGTCGGATCGTCCAAGAAGAGAGCGAGGAAGG	2	WT	VKSATLSSTESTASGMQDEVRAVGEEQRSEEPKRRVDTSVSWEALICVGSSKKRARKASSSDDEGGPRTLGGDGHRAEEASKDKE	VKSATLSSTESTASGMQDEVRAVGEEQRSEEPKRRVDTSVSWEALICVGSSKKRARKASSSDDEGGPRTLGGDGHRAEEASKDKE
CACGGCGTCTGGAATGCAGGATGAGGTCAGAGCGGTTGGCGAGGAGCAAAGGTCAGAGGAGCCAAAGCGCAGGGTGGATACTTCAGTGTCTTGGGAGGCGTTGATTTGTGTCGGATCGTCCAAGAAGAGAGCGAGGAAGG	CACGGCGTCTGGAATGCAGGATGAGGTCGGAGCGGTTGGCGAGGAGCAAAGGTCAGAGGAGCCAAAGCGCAGGGTGGATACTTCAGTGTCTTGGGAGGCGTTGATTTGTGTCGGATCGTCCAAGAAGAGAGCGAGGAAGG	2	WT	VKSATLSSTESTASGMQDEVRAVGEEQRSEEPKRRVDTSVSWEALICVGSSKKRARKASSSDDEGGPRTLGGDGHRAEEASKDKE	VKSATLSSTESTASGMQDEVRAVGEEQRSEEPKRRVDTSVSWEALICVGSSKKRARKASSSDDEGGPRTLGGDGHRAEEASKDKE
CACGGCGTCTGGAATGCAGGATGAGGTCAGAGCGGTTGGCGAGGAGCAAAGGTCAGAGGAGCCAAAGCGCAGGGTGGATACTTCAGTGTCTTGGGAGGCGTTGATTTGTGTCGGATCGTCCAAGAAGAGAGCGAGGAAGG	CACGGCGTCTGGAATGCAGGATGAGGTCAGAGCGGTTGGCGAGGAGCAAAGGTCAGAGGAGCCAAAGCGCAGGGTGGATACTTCAGTGTCTTGGGAGGCGCTGATTTGTGTCGGATCGTCCAAGAAGAGAGCGAGGAAGG	2	WT	VKSATLSSTESTASGMQDEVRAVGEEQRSEEPKRRVDTSVSWEALICVGSSKKRARKASSSDDEGGPRTLGGDGHRAEEASKDKE	VKSATLSSTESTASGMQDEVRAVGEEQRSEEPKRRVDTSVSWEALICVGSSKKRARKASSSDDEGGPRTLGGDGHRAEEASKDKE
CACGGCGTCTGGAATGCAGGATGAGGTCAGAGCGGTTGGCGAGGAGCAAAGGTCAGAGGAGCCAAAGCGCAGGGTGGATACTTCAGTGTCTTGGGAGGCGTTGATTTGTGTCGGATCGTCCAAGAAGAGAGCGAGGAAGG	CACGGCGTCTGGAATGCAGGATGAGGTCAGAGCGGTTGGCGAGGAGCAAAGGTCAGAGGAGCCAAAGCGCAGGGTGGATACTTCAGTGTCTTGGGAGGCGTTGATTTGTGTCGGATCGTCCAAGAAAAGAGCGAGGAAGG	2	WT	VKSATLSSTESTASGMQDEVRAVGEEQRSEEPKRRVDTSVSWEALICVGSSKKRARKASSSDDEGGPRTLGGDGHRAEEASKDKE	VKSATLSSTESTASGMQDEVRAVGEEQRSEEPKRRVDTSVSWEALICVGSSKKRARKASSSDDEGGPRTLGGDGHRAEEASKDKE
CACGGCGTCTGGAATGCAGGATGAGGTCAGAGCGGTTGGCGAGGAGCAAAGGTCAGAGGAGCCAAAGCGCAGGGTGGATACTTCAGTGTCTTGGGAGGCGTTGATTTGTGTCGGATCGTCCAAGAAGAGAGCGAGGAAGG	CACGGCGTCTGGAATGCAGGATGAGGTCAGAGCGGTTGGCGAGGAGCAAAGGTCAGAGGAGCCAAGGCGCAGGGTGGATACTGCAGTGGCTTGGGAGGCGTTGATTTGTGTCGGATCGTCCAAGAAGAGAGCGAGGAAGG	2	WT	VKSATLSSTESTASGMQDEVRAVGEEQRSEEPKRRVDTSVSWEALICVGSSKKRARKASSSDDEGGPRTLGGDGHRAEEASKDKE	VKSATLSSTESTASGMQDEVRAVGEEQRSEEPKRRVDTSVSWEALICVGSSKKRARKASSSDDEGGPRTLGGDGHRAEEASKDKE
CACGGCGTCTGGAATGCAGGATGAGGTCAGAGCGGTTGGCGAGGAGCAAAGGTCAGAGGAGCCAAAGCGCAGGGTGGATACTTCAGTGTCTTGGGAGGCGTTGATTTGTGTCGGATCGTCCAAGAAGAGAGCGAGGAAGG	CACGGCGTCTGGAATGCAGGATGAGGTCAGAGCGGTTGGCGAGGAGCAAAGGTCAGAGGAACCAAAGCGCAGGGTGGATACTTCAGTGTCTTGGGAGGCGTTGATTTGTGTCGGATCGTCCAAGAAGAGAGCGAGGAAGG	2	WT	VKSATLSSTESTASGMQDEVRAVGEEQRSEEPKRRVDTSVSWEALICVGSSKKRARKASSSDDEGGPRTLGGDGHRAEEASKDKE	VKSATLSSTESTASGMQDEVRAVGEEQRSEEPKRRVDTSVSWEALICVGSSKKRARKASSSDDEGGPRTLGGDGHRAEEASKDKE
CACGGCGTCTGGAATGCAGGATGAGGTCAGAGCGGTTGGCGAGGAGCAAAGGTCAGAGGAGCCAAAGCGCAGGGTGGATACTTCAGTGTCTTGGGAGGCGTTGATTTGTGTCGGATCGTCCAAGAAGAGAGCGAGGAAGG	CACGGCGTCTTGAATGCAGGATGAGGTCAGAGCGGTTGGCGAGGAGCAAAGGTCAGAGGAGCCAAAGCGCAGGGTGGATACTTCAGTGTCTTGGGAGGCGTTGATTTGTGTCGGATCGTCCAAGAAGAGAGCGAGGAAGG	2	WT	VKSATLSSTESTASGMQDEVRAVGEEQRSEEPKRRVDTSVSWEALICVGSSKKRARKASSSDDEGGPRTLGGDGHRAEEASKDKE	VKSATLSSTESTASGMQDEVRAVGEEQRSEEPKRRVDTSVSWEALICVGSSKKRARKASSSDDEGGPRTLGGDGHRAEEASKDKE
CACGGCGTCTGGAATGCAGGATGAGGTCAGAGCGGTTGGCGAGGAGCAAAGGTCAGAGGAGCCAAAGCGCAGGGTGGATACTTCAGTGTCTTGGGAGGCGTTGATTTGTGTCGGATCGTCCAAGAAGAGAGCGAGGAAGG	CACGGCGTCTGGAATGCAGGATGAGGTCAGAGCGGTTGGCGAGGAGCAAAGGTCAGAGGAGCCAAAGCGCAGGGTGGATACTTCAGTGTCTTGGGAGGCGTTGATTTGTGTCGGATCGTCCAAGAAGAGAGCGGGGAAGG	2	WT	VKSATLSSTESTASGMQDEVRAVGEEQRSEEPKRRVDTSVSWEALICVGSSKKRARKASSSDDEGGPRTLGGDGHRAEEASKDKE	VKSATLSSTESTASGMQDEVRAVGEEQRSEEPKRRVDTSVSWEALICVGSSKKRARKASSSDDEGGPRTLGGDGHRAEEASKDKE
CACGGCGTCTGGAATGCAGGATGAGGTCAGAGCGGTTGGCGAGGAGCAAAGGTCAGAGGAGCCAAAGCGCAGGGTGGATACTTCAGTGTCTTGGGAGGCGTTGATTTGTGTCGGATCGTCCAAGAAGAGAGCGAGGAAGG	CACGGCGTCTGGAATGCAGGATGAGGTCAGAGCGGTTGGCGAGGAGCAAAGGTCAGAGGAGCCAAAGCGCAGGGTGGATACTTCATTGTCTTGGGAGGCGTTGATTTGTGTCGGATCGTCCAAGAAGAGAGCGAGGAAGG	2	WT	VKSATLSSTESTASGMQDEVRAVGEEQRSEEPKRRVDTSVSWEALICVGSSKKRARKASSSDDEGGPRTLGGDGHRAEEASKDKE	VKSATLSSTESTASGMQDEVRAVGEEQRSEEPKRRVDTSVSWEALICVGSSKKRARKASSSDDEGGPRTLGGDGHRAEEASKDKE
CACGGCGTCTGGAATGCAGGATGAGGTCAGAGCGGTTGGCGAGGAGCAAAGGTCAGAGGAGCCAAAGCGCAGGGTGGATACTTCAGTGTCTTGGGAGGCGTTGATTTGTGTCGGATCGTCCAAGAAGAGAGCGAGGAAGG	CACGGCGTCTGGAATGCAGGATGAGGTCAGAGCGGTTGGCGAGGAGCATAGGTCAGAGGAGCCAAAGCGCAGGGTGGATACTTCAGTGTCTTGGGAGGCGTTGATTTGTGTCGGATCGTCCAAGAAGAGAGCGAGGAAGG	2	WT	VKSATLSSTESTASGMQDEVRAVGEEQRSEEPKRRVDTSVSWEALICVGSSKKRARKASSSDDEGGPRTLGGDGHRAEEASKDKE	VKSATLSSTESTASGMQDEVRAVGEEQRSEEPKRRVDTSVSWEALICVGSSKKRARKASSSDDEGGPRTLGGDGHRAEEASKDKE
CACGGCGTCTGGAATGCAGGATGAGGTCAGAGCGGTTGGCGAGGAGCAAAGGTCAGAGGAGCCAAAGCGCAGGGTGGATACTTCAGTGTCTTGGGAGGCGTTGATTTGTGTCGGATCGTCCAAGAAGAGAGCGAGGAAGG	CACGGCGTCTGGAATGCAGGATGAGATCAGAGCGGTTGGCGAGGAGCAAAGGTCAGAGGAGCCAAAGCGCAGGGTGGATACTTCAGTGTCTTGGGAGGCGTTGATTTGTGTCGGATCGTCCAAGAAGAGAGCGAGGAAGG	2	WT	VKSATLSSTESTASGMQDEVRAVGEEQRSEEPKRRVDTSVSWEALICVGSSKKRARKASSSDDEGGPRTLGGDGHRAEEASKDKE	VKSATLSSTESTASGMQDEVRAVGEEQRSEEPKRRVDTSVSWEALICVGSSKKRARKASSSDDEGGPRTLGGDGHRAEEASKDKE
CACGGCGTCTGGAATGCAGGATGAGGTCAGAGCGGTTGGCGAGGAGCAAAGGTCAGAGGAGCCAAAGCGCAGGGTGGATACTTCAGTGTCTTGGGAGGCGTTGATTTGTGTCGGATCGTCCAAGAAGAGAGCGAGGAAGG	CACGGCGTCTGGAATGCAGGATGAGGTCAGAGCGGTTGGCGAGGAGCAAAGGTCAGAGGAGCCAAAGCGCAGGGTGGATACTTCAGTGTCTTGGGAGGCGTTGATTTGTGTCGGATCGTCCAAGAAGAGAGCAAGGAAGG	2	WT	VKSATLSSTESTASGMQDEVRAVGEEQRSEEPKRRVDTSVSWEALICVGSSKKRARKASSSDDEGGPRTLGGDGHRAEEASKDKE	VKSATLSSTESTASGMQDEVRAVGEEQRSEEPKRRVDTSVSWEALICVGSSKKRARKASSSDDEGGPRTLGGDGHRAEEASKDKE
CACGGCGTCTGGAATGCAGGATGAGGTCAGAGCGGTTGGCGAGGAGCAAAGGTCAGAGGAGCCAAAGCGCAGGGTGGATACTTCAGTGTCTTGGGAGGCGTTGATTTGTGTCGGATCGTCCAAGAAGAGAGCGAGGAAGG	CACGGCGTCTGGAATGCAGGATGAGGTCAGAGCGGTTGGCGAGGAGCAAAGGTCAGAGGAGCCAAAGCGCAGGGTGGATACTTCGGTGTCTTGGGAGGCGTTGATTTGTGTCGGATCGTCCAAGAAGAGAGCGAGGAAGG	2	WT	VKSATLSSTESTASGMQDEVRAVGEEQRSEEPKRRVDTSVSWEALICVGSSKKRARKASSSDDEGGPRTLGGDGHRAEEASKDKE	VKSATLSSTESTASGMQDEVRAVGEEQRSEEPKRRVDTSVSWEALICVGSSKKRARKASSSDDEGGPRTLGGDGHRAEEASKDKE
CACGGCGTCTGGAATGCAGGATGAGGTCAGAGCGGTTGGCGAGGAGCAAAGGTCAGAGGAGCCAAAGCGCAGGGTGGATACTTCAGTGTCTTGGGAGGCGTTGATTTGTGTCGGATCGTCCAAGAAGAGAGCGAGGAAGG	CACGGCGTCTGGAACGCAGGATGAGGTCAGAGCGGTTGGCGAGGAGCAAAGGTCAGAGGAGCCAAAGCGCAGGGTGGATACTTCAGTGTCTTGGGAGGCGTTGATTTGTGTCGGATCGTCCAAGAAGAGAGCGAGGAAGG	2	WT	VKSATLSSTESTASGMQDEVRAVGEEQRSEEPKRRVDTSVSWEALICVGSSKKRARKASSSDDEGGPRTLGGDGHRAEEASKDKE	VKSATLSSTESTASGMQDEVRAVGEEQRSEEPKRRVDTSVSWEALICVGSSKKRARKASSSDDEGGPRTLGGDGHRAEEASKDKE
CACGGCGTCTGGAATGCAGGATGAGGTCAGAGCGGTTGGCGAGGAGCAAAGGTCAGAGGAGCCAAAGCGCAGGGTGGATACTTCAGTGTCTTGGGAGGCGTTGATTTGTGTCGGATCGTCCAAGAAGAGAGCGAGGAAGG	CACGGCGTCTGGAATGCAGGATGAGGCCAGAGCGGTTGGCGAGGAGCAAAGGTCAGAGGAGCCAAAGCGCAGGGTGGATACTTCAGTGTCTTGGGAGGCGTTGATTTGTGTCGGATCGTCCAAGAAGAGAGCGAGGAAGG	2	WT	VKSATLSSTESTASGMQDEVRAVGEEQRSEEPKRRVDTSVSWEALICVGSSKKRARKASSSDDEGGPRTLGGDGHRAEEASKDKE	VKSATLSSTESTASGMQDEVRAVGEEQRSEEPKRRVDTSVSWEALICVGSSKKRARKASSSDDEGGPRTLGGDGHRAEEASKDKE
CACGGCGTCTGGAATGCAGGATGAGGTCAGAGCGGTTGGCGAGGAGCAAAGGTCAGAGGAGCCAAAGCGCAGGGTGGATACTTCAGTGTCTTGGGAGGCGTTGATTTGTGTCGGATCGTCCAAGAAGAGAGCGAGGAAGG	CACGGCGTCTGGAATGCAGGATGAGGTCAGAGCGGTTGGCGAGGAGCAGAGGTCAGAGGAGCCAAAGCGCAGGGTGGATACTTCAGTGTCTTGGGAGGCGTTGATTTGTGTCGGATCGTCCAAGAAGAGAGCGAGGAAGG	2	WT	VKSATLSSTESTASGMQDEVRAVGEEQRSEEPKRRVDTSVSWEALICVGSSKKRARKASSSDDEGGPRTLGGDGHRAEEASKDKE	VKSATLSSTESTASGMQDEVRAVGEEQRSEEPKRRVDTSVSWEALICVGSSKKRARKASSSDDEGGPRTLGGDGHRAEEASKDKE
CACGGCGTCTGGAATGCAGGATGAGGTCAGAGCGGTTGGCGAGGAGCAAAGGTCAGAGGAGCCAAAGCGCAGGGTGGATACTTCAGTGTCTTGGGAGGCGTTGATTTGTGTCGGATCGTCCAAGAAGAGAGCGAGGAAGG	CACGGCGTCTGGAATGCAGGATGAGGTCAGTGCGGTTGGCGAGGAGCAAAGGTCAGAGGAGCCAAAGCGCAGGGTGGATACTTCAGTGTCTTGGGAGGCGTTGATTTGTGTCGGATCGTCCAAGAAGAGAGCGAGGAAGG	2	WT	VKSATLSSTESTASGMQDEVRAVGEEQRSEEPKRRVDTSVSWEALICVGSSKKRARKASSSDDEGGPRTLGGDGHRAEEASKDKE	VKSATLSSTESTASGMQDEVRAVGEEQRSEEPKRRVDTSVSWEALICVGSSKKRARKASSSDDEGGPRTLGGDGHRAEEASKDKE
CACGGCGTCTGGAATGCAGGATGAGGTCAGAGCGGTTGGCGAGGAGCAAAGGTCAGAGGAGCCAAAGCGCAGGGTGGATACTTCAGTGTCTTGGGAGGCGTTGATTTGTGTCGGATCGTCCAAGAAGAGAGCGAGGAAGG	CACGGCGTCTGGAATGCAGGATGAGGTCAGAGCGGTTGGCGAGGAGCAAAGGTCAGAGGAGCCAAAGCGCAGGGTGGATACTTCAGTGTCTTGGGAGGCGTTGATTTGTGTCGTATCGTCCAAGAAGAGAGCGAGGAAGG	2	WT	VKSATLSSTESTASGMQDEVRAVGEEQRSEEPKRRVDTSVSWEALICVGSSKKRARKASSSDDEGGPRTLGGDGHRAEEASKDKE	VKSATLSSTESTASGMQDEVRAVGEEQRSEEPKRRVDTSVSWEALICVGSSKKRARKASSSDDEGGPRTLGGDGHRAEEASKDKE
CACGGCGTCTGGAATGCAGGATGAGGTCAGAGCGGTTGGCGAGGAGCAAAGGTCAGAGGAGCCAAAGCGCAGGGTGGATACTTCAGTGTCTTGGGAGGCGTTGATTTGTGTCGGATCGTCCAAGAAGAGAGCGAGGAAGG	CACGGCGTCTGGAGTGCAGGATGAGGTCAGAGCGGTTGGCGAGGAGCAAAGGTCAGAGGAGCCAAAGCGCAGGGTGGATACTTCAGTGTCTTGGGAGGCGTTGATTTGTGTCGGATCGTCCAAGAAGAGAGCGAGGAAGG	2	WT	VKSATLSSTESTASGMQDEVRAVGEEQRSEEPKRRVDTSVSWEALICVGSSKKRARKASSSDDEGGPRTLGGDGHRAEEASKDKE	VKSATLSSTESTASGMQDEVRAVGEEQRSEEPKRRVDTSVSWEALICVGSSKKRARKASSSDDEGGPRTLGGDGHRAEEASKDKE
CACGGCGTCTGGAATGCAGGATGAGGTCAGAGCGGTTGGCGAGGAGCAAAGGTCAGAGGAGCCAAAGCGCAGGGTGGATACTTCAGTGTCTTGGGAGGCGTTGATTTGTGTCGGATCGTCCAAGAAGAGAGCGAGGAAGG	CACGGCGTCTGGAATGCAGGATGAGGTCAGAGCGGTTGGCGAGGAGCAAAGGTCAGAGGAGCCAAAGCGCAGGGTGGATACTTCAGTGTCTTGGGAGGCGTTGATTTGTGTCGGATCGTCCAAGACGAGAGCGAGGAAGG	2	WT	VKSATLSSTESTASGMQDEVRAVGEEQRSEEPKRRVDTSVSWEALICVGSSKKRARKASSSDDEGGPRTLGGDGHRAEEASKDKE	VKSATLSSTESTASGMQDEVRAVGEEQRSEEPKRRVDTSVSWEALICVGSSKKRARKASSSDDEGGPRTLGGDGHRAEEASKDKE
CACGGCGTCTGGAATGCAGGATGAGGTCAGAGCGGTTGGCGAGGAGCAAAGGTCAGAGGAGCCAAAGCGCAGGGTGGATACTTCAGTGTCTTGGGAGGCGTTGATTTGTGTCGGATCGTCCAAGAAGAGAGCGAGGAAGG	CACGGCGTCTGGAATGCAGGATGAGGTCAGAGCGGTTGGCGAGGAGCAAAGGTCAGAGGAGCCAAAGCGCAGGGTGGATACTTCAGTGTCTTGGGAGGCGTTGATTTGTGTCGGATTGTCCAAGAAGAGAGCGAGGAAGG	2	WT	VKSATLSSTESTASGMQDEVRAVGEEQRSEEPKRRVDTSVSWEALICVGSSKKRARKASSSDDEGGPRTLGGDGHRAEEASKDKE	VKSATLSSTESTASGMQDEVRAVGEEQRSEEPKRRVDTSVSWEALICVGSSKKRARKASSSDDEGGPRTLGGDGHRAEEASKDKE
CACGGCGTCTGGAATGCAGGATGAGGTCAGAGCGGTTGGCGAGGAGCAAAGGTCAGAGGAGCCAAAGCGCAGGGTGGATACTTCAGTGTCTTGGGAGGCGTTGATTTGTGTCGGATCGTCCAAGAAGAGAGCGAGGAAGG	CACGGCGTCTGGAATGCAGGATGAGGTCAGAGCGGTTGGCGAGGAGCAAAGGTCAGAGGAGCCTAAGCGCAGGGTGGATACTTCAGTGTCTTGGGAGGCGTTGATTTGTGTCGGATCGTCCAAGAAGAGAGCGAGGAAGG	2	WT	VKSATLSSTESTASGMQDEVRAVGEEQRSEEPKRRVDTSVSWEALICVGSSKKRARKASSSDDEGGPRTLGGDGHRAEEASKDKE	VKSATLSSTESTASGMQDEVRAVGEEQRSEEPKRRVDTSVSWEALICVGSSKKRARKASSSDDEGGPRTLGGDGHRAEEASKDKE
CACGGCGTCTGGAATGCAGGATGAGGTCAGAGCGGTTGGCGAGGAGCAAAGGTCAGAGGAGCCAAAGCGCAGGGTGGATACTTCAGTGTCTTGGGAGGCGTTGATTTGTGTCGGATCGTCCAAGAAGAGAGCGAGGAAGG	CACGGCGTCTGGAATGCAGGATGAGGTCAGAGCGGTTGGCGAGGAGCAAAGGTCAGAGGAGCCAAAGCGCAGGGTGGATACTTCAGTGTCTTGGGAGGCGTTTATTTGTGTCGGATCGTCCAAGAAGAGAGCGAGGAGGG	2	WT	VKSATLSSTESTASGMQDEVRAVGEEQRSEEPKRRVDTSVSWEALICVGSSKKRARKASSSDDEGGPRTLGGDGHRAEEASKDKE	VKSATLSSTESTASGMQDEVRAVGEEQRSEEPKRRVDTSVSWEALICVGSSKKRARKASSSDDEGGPRTLGGDGHRAEEASKDKE
CACGGCGTCTGGAATGCAGGATGAGGTCAGAGCGGTTGGCGAGGAGCAAAGGTCAGAGGAGCCAAAGCGCAGGGTGGATACTTCAGTGTCTTGGGAGGCGTTGATTTGTGTCGGATCGTCCAAGAAGAGAGCGAGGAAGG	CACGGCGTCTGGAATGCAGGATGAGGTCAGAGCGGTTGGCGAGGAGCAAAGGTCAGAGGAGCCAAAGCGCAGGGTGGATACTTCAGTGTCTTGGGAAGCGTTGATTTGTGTCGGATCGTCCAAGAAGAGAGCGAGGAAGG	2	WT	VKSATLSSTESTASGMQDEVRAVGEEQRSEEPKRRVDTSVSWEALICVGSSKKRARKASSSDDEGGPRTLGGDGHRAEEASKDKE	VKSATLSSTESTASGMQDEVRAVGEEQRSEEPKRRVDTSVSWEALICVGSSKKRARKASSSDDEGGPRTLGGDGHRAEEASKDKE
CACGGCGTCTGGAATGCAGGATGAGGTCAGAGCGGTTGGCGAGGAGCAAAGGTCAGAGGAGCCAAAGCGCAGGGTGGATACTTCAGTGTCTTGGGAGGCGTTGATTTGTGTCGGATCGTCCAAGAAGAGAGCGAGGAAGG	CACGGCGTCTGGAATGCAGGATGAGGTCAGAGCGGTTGGCGAGGAGCAAAGGTCAGAAGAGCCAAAGCGCAGGGTGGATACTTCAGTGTCTTGGGAGGCGTTGATTTGTGTCGGATCGTCCAAGAAGAGAGCGAGGAAGG	2	WT	VKSATLSSTESTASGMQDEVRAVGEEQRSEEPKRRVDTSVSWEALICVGSSKKRARKASSSDDEGGPRTLGGDGHRAEEASKDKE	VKSATLSSTESTASGMQDEVRAVGEEQRSEEPKRRVDTSVSWEALICVGSSKKRARKASSSDDEGGPRTLGGDGHRAEEASKDKE
CACGGCGTCTGGAATGCAGGATGAGGTCAGAGCGGTTGGCGAGGAGCAAAGGTCAGAGGAGCCAAAGCGCAGGGTGGATACTTCAGTGTCTTGGGAGGCGTTGATTTGTGTCGGATCGTCCAAGAAGAGAGCGAGGAAGG	CACGGCGTCTGGAATGCAGGATGAGGTTAGAGCGGTTGGCGAGGAGCAAAGGTCAGAGGAGCCAAAGCGCAGGGTGGATACTTCAGTGTCTTGGGAGGCGTTGATTTGTGTCGGATCGTCCAAGAAGAGAGCGAGGAAGG	2	WT	VKSATLSSTESTASGMQDEVRAVGEEQRSEEPKRRVDTSVSWEALICVGSSKKRARKASSSDDEGGPRTLGGDGHRAEEASKDKE	VKSATLSSTESTASGMQDEVRAVGEEQRSEEPKRRVDTSVSWEALICVGSSKKRARKASSSDDEGGPRTLGGDGHRAEEASKDKE
CACGGCGTCTGGAATGCAGGATGAGGTCAGAGCGGTTGGCGAGGAGCAAAGGTCAGAGGAGCCAAAGCGCAGGGTGGATACTTCAGTGTCTTGGGAGGCGTTGATTTGTGTCGGATCGTCCAAGAAGAGAGCGAGGAAGG	CACGGCGTCTGGAATGCAGGATGAGGTCAGAGCGGTTGGCGAGGAGCAAAGGTCAGAGGAGCCAAAGCGCAGGGTGGATACTTCAGTGTCTTGGGAGGCGTTGATTTGTGTCGGATCGTCCATGAAGAGAGCGAGGAAGG	2	WT	VKSATLSSTESTASGMQDEVRAVGEEQRSEEPKRRVDTSVSWEALICVGSSKKRARKASSSDDEGGPRTLGGDGHRAEEASKDKE	VKSATLSSTESTASGMQDEVRAVGEEQRSEEPKRRVDTSVSWEALICVGSSKKRARKASSSDDEGGPRTLGGDGHRAEEASKDKE
CACGGCGTCTGGAATGCAGGATGAGGTCAGAGCGGTTGGCGAGGAGCAAAGGTCAGAGGAGCCAAAGCGCAGGGTGGATACTTCAGTGTCTTGGGAGGCGTTGATTTGTGTCGGATCGTCCAAGAAGAGAGCGAGGAAGG	CACGGCGTCTGGAATGCAGGATGAGGTCAGAGCGGTTGGCGAGGAGCAAAGGTCAGAGGAGCCAAAGCGCAGGGTGGATACTTCAGTGTCTTGGGAGGCGTTAATTTGTGTCGGATCGTCCAAGAAGAGAGCGAGGAAGG	2	WT	VKSATLSSTESTASGMQDEVRAVGEEQRSEEPKRRVDTSVSWEALICVGSSKKRARKASSSDDEGGPRTLGGDGHRAEEASKDKE	VKSATLSSTESTASGMQDEVRAVGEEQRSEEPKRRVDTSVSWEALICVGSSKKRARKASSSDDEGGPRTLGGDGHRAEEASKDKE
CACGGCGTCTGGAATGCAGGATGAGGTCAGAGCGGTTGGCGAGGAGCAAAGGTCAGAGGAGCCAAAGCGCAGGGTGGATACTTCAGTGTCTTGGGAGGCGTTGATTTGTGTCGGATCGTCCAAGAAGAGAGCGAGGAAGG	CACGGCGTCTGGAATGCAGGATGAGGTCAGAGCGGTTGGCGAGGAGCAAAGGTCAGAGGAGCCAAAGCGCAGAGTGGATACTTCAGTGTCTTGGGAGGCGTTGATTTGTGTCGGATCGTCCAAGAAGAGAGCGAGGAAGG	2	WT	VKSATLSSTESTASGMQDEVRAVGEEQRSEEPKRRVDTSVSWEALICVGSSKKRARKASSSDDEGGPRTLGGDGHRAEEASKDKE	VKSATLSSTESTASGMQDEVRAVGEEQRSEEPKRRVDTSVSWEALICVGSSKKRARKASSSDDEGGPRTLGGDGHRAEEASKDKE
CACGGCGTCTGGAATGCAGGATGAGGTCAGAGCGGTTGGCGAGGAGCAAAGGTCAGAGGAGCCAAAGCGCAGGGTGGATACTTCAGTGTCTTGGGAGGCGTTGATTTGTGTCGGATCGTCCAAGAAGAGAGCGAGGAAGG	CACGGCGTCTGGAATGCAGGATGAGGTCAGAGCGGTTGGCGAGGAGCAAAGGTCAGAGGAGCCAAAGCGCAGGGTGGATACTTCAGTGTCTTGGGAGGCGTTGATTTGTGTCGGATCGTCCAGGAAGAGAGCGAGGAAGG	2	WT	VKSATLSSTESTASGMQDEVRAVGEEQRSEEPKRRVDTSVSWEALICVGSSKKRARKASSSDDEGGPRTLGGDGHRAEEASKDKE	VKSATLSSTESTASGMQDEVRAVGEEQRSEEPKRRVDTSVSWEALICVGSSKKRARKASSSDDEGGPRTLGGDGHRAEEASKDKE
CACGGCGTCTGGAATGCAGGATGAGGTCAGAGCGGTTGGCGAGGAGCAAAGGTCAGAGGAGCCAAAGCGCAGGGTGGATACTTCAGTGTCTTGGGAGGCGTTGATTTGTGTCGGATCGTCCAAGAAGAGAGCGAGGAAGG	CACGGCGTCTGGAATGCAGGATGAGGTCAGAGCGGTTGGCGAGGAGCAAAGGTCAGAGGAGCCAAAGCGCAGGGTGGATACTTCAGTGTCTTGGGAGGCGTTGATTTGTGTCGGATCGTCCAAGAAGAGGGCGAGGAAGG	2	WT	VKSATLSSTESTASGMQDEVRAVGEEQRSEEPKRRVDTSVSWEALICVGSSKKRARKASSSDDEGGPRTLGGDGHRAEEASKDKE	VKSATLSSTESTASGMQDEVRAVGEEQRSEEPKRRVDTSVSWEALICVGSSKKRARKASSSDDEGGPRTLGGDGHRAEEASKDKE
CACGGCGTCTGGAATGCAGGATGAGGTCAGAGCGGTTGGCGAGGAGCAAAGGTCAGAGGAGCCAAAGCGCAGGGTGGATACTTCAGTGTCTTGGGAGGCGTTGATTTGTGTCGGATCGTCCAAGAAGAGAGCGAGGAAGG	CACGGCGTCTGGAATGCAGGATGAGGTCAGAGCGGTTGACGAGGAGCAAAGGTCAGAGGAGCCAAAGCGCAGGGTGGATACTTCAGTGTCTTGGGAGGCGTTGATTTGTGTCGGATCGTCCAAGAAGAGAGCGAGGAAGG	2	WT	VKSATLSSTESTASGMQDEVRAVGEEQRSEEPKRRVDTSVSWEALICVGSSKKRARKASSSDDEGGPRTLGGDGHRAEEASKDKE	VKSATLSSTESTASGMQDEVRAVGEEQRSEEPKRRVDTSVSWEALICVGSSKKRARKASSSDDEGGPRTLGGDGHRAEEASKDKE
CACGGCGTCTGGAATGCAGGATGAGGTCAGAGCGGTTGGCGAGGAGCAAAGGTCAGAGGAGCCAAAGCGCAGGGTGGATACTTCAGTGTCTTGGGAGGCGTTGATTTGTGTCGGATCGTCCAAGAAGAGAGCGAGGAAGG	CACGTCGTCTGGAATGCAGGATGAGGTCAGAGCGGTTGGCGAGGAGCAAAGGTCAGAGGAGCCAAAGCGCAGGGTGGATACTTCAGTGTCTTGGGAGGCGTTGATTTGTGTCGGATCGTCCAAGAAGAGAGCGAGGAAGG	2	WT	VKSATLSSTESTASGMQDEVRAVGEEQRSEEPKRRVDTSVSWEALICVGSSKKRARKASSSDDEGGPRTLGGDGHRAEEASKDKE	VKSATLSSTESTASGMQDEVRAVGEEQRSEEPKRRVDTSVSWEALICVGSSKKRARKASSSDDEGGPRTLGGDGHRAEEASKDKE
CACGGCGTCTGGAATGCAGGATGAGGTCAGAGCGGTTGGCGAGGAGCAAAGGTCAGAGGAGCCAAAGCGCAGGGTGGATACTTCAGTGTCTTGGGAGGCGTTGATTTGTGTCGGATCGTCCAAGAAGAGAGCGAGGAAGG	CACGGCGTCTGGAATGCAGGATGAGGTCAGAGCGGTTGGTGAGGAGCAAAGGTCAGAGGAGCCAAAGCGCAGGGTGGATACTTCAGTGTCTTGGGAGGCGTTGATTTGTGTCGGATCGTCCAAGAAGAGAGCGAGGAAGG	2	WT	VKSATLSSTESTASGMQDEVRAVGEEQRSEEPKRRVDTSVSWEALICVGSSKKRARKASSSDDEGGPRTLGGDGHRAEEASKDKE	VKSATLSSTESTASGMQDEVRAVGEEQRSEEPKRRVDTSVSWEALICVGSSKKRARKASSSDDEGGPRTLGGDGHRAEEASKDKE
CACGGCGTCTGGAATGCAGGATGAGGTCAGAGCGGTTGGCGAGGAGCAAAGGTCAGAGGAGCCAAAGCGCAGGGTGGATACTTCAGTGTCTTGGGAGGCGTTGATTTGTGTCGGATCGTCCAAGAAGAGAGCGAGGAAGG	CACGGCGTCTGGAATGCAGGATGAGGTCAGAGCGGTTGGCGAGGAGCAAAGGTCAGAGGAGCCAAAGCGCAGGGTGGATACTTCAGTGTCTTGGGAGGCGTTGATTTGTGTAGGATCGTCCAAGAAGAGAGCGAGGAAGG	2	WT	VKSATLSSTESTASGMQDEVRAVGEEQRSEEPKRRVDTSVSWEALICVGSSKKRARKASSSDDEGGPRTLGGDGHRAEEASKDKE	VKSATLSSTESTASGMQDEVRAVGEEQRSEEPKRRVDTSVSWEALICVGSSKKRARKASSSDDEGGPRTLGGDGHRAEEASKDKE
CACGGCGTCTGGAATGCAGGATGAGGTCAGAGCGGTTGGCGAGGAGCAAAGGTCAGAGGAGCCAAAGCGCAGGGTGGATACTTCAGTGTCTTGGGAGGCGTTGATTTGTGTCGGATCGTCCAAGAAGAGAGCGAGGAAGG	CACGGCGTCTGGAATGCAGGATGAGGTCAGAGCGGTTGGCGAGGAGCAAAGGTCAGAGGAGCCAAAGCGCAGGGTGGATACTGCAGTGGCTTGGGGGGCGTTGATTTGTGTCGGATCGTCCAAGAAGAGAGCGAGGAAGG	2	WT	VKSATLSSTESTASGMQDEVRAVGEEQRSEEPKRRVDTSVSWEALICVGSSKKRARKASSSDDEGGPRTLGGDGHRAEEASKDKE	VKSATLSSTESTASGMQDEVRAVGEEQRSEEPKRRVDTSVSWEALICVGSSKKRARKASSSDDEGGPRTLGGDGHRAEEASKDKE
CACGGCGTCTGGAATGCAGGATGAGGTCAGAGCGGTTGGCGAGGAGCAAAGGTCAGAGGAGCCAAAGCGCAGGGTGGATACTTCAGTGTCTTGGGAGGCGTTGATTTGTGTCGGATCGTCCAAGAAGAGAGCGAGGAAGG	CACGGCGTCTGGAATGTAGGATGAGGTCAGAGCGGTTGGCGAGGAGCAAAGGTCAGGGGAGCCAAAGCGCAGGGTGGATACTTCAGTGTCTTGGGAGGCGTTGATTTGTGTCGGATCGTCCAAGAAGAGAGCGAGGAAGG	2	WT	VKSATLSSTESTASGMQDEVRAVGEEQRSEEPKRRVDTSVSWEALICVGSSKKRARKASSSDDEGGPRTLGGDGHRAEEASKDKE	VKSATLSSTESTASGMQDEVRAVGEEQRSEEPKRRVDTSVSWEALICVGSSKKRARKASSSDDEGGPRTLGGDGHRAEEASKDKE
CACGGCGTCTGGAATGCAGGATGAGGTCAGAGCGGTTGGCGAGGAGCAAAGGTCAGAGGAGCCAAAGCGCAGGGTGGATACTTCAGTGTCTTGGGAGGCGTTGATTTGTGTCGGATCGTCCAAGAAGAGAGCGAGGAAGG	CACGGCGTCTGGAATGCAGGATGAGGTCAGAGCGGTTGGCGAGGAGCAAAGGTCAGAGGAGCCAAAGCGCAGGGTGGATACTTCAGTGTCTTGGGAGGCGTTGATTTGTGTCGAATCGTCCAAGAAGAGAGCGAGGAAGG	2	WT	VKSATLSSTESTASGMQDEVRAVGEEQRSEEPKRRVDTSVSWEALICVGSSKKRARKASSSDDEGGPRTLGGDGHRAEEASKDKE	VKSATLSSTESTASGMQDEVRAVGEEQRSEEPKRRVDTSVSWEALICVGSSKKRARKASSSDDEGGPRTLGGDGHRAEEASKDKE
CACGGCGTCTGGAATGCAGGATGAGGTCAGAGCGGTTGGCGAGGAGCAAAGGTCAGAGGAGCCAAAGCGCAGGGTGGATACTTCAGTGTCTTGGGAGGCGTTGATTTGTGTCGGATCGTCCAAGAAGAGAGCGAGGAAGG	CACGGCGTCTGGAATGCAGGATGAGGTCAGAGCGGTTGGCGAGGAGCAAAGGTCAGAGGAGCCAAAGCGCAGGGTGGATACTTCAGTGTCTTGGGAGGCGTTGATTTGTGTCGGATCGTCCAAGAAGAGAGCGAAGAAGG	2	WT	VKSATLSSTESTASGMQDEVRAVGEEQRSEEPKRRVDTSVSWEALICVGSSKKRARKASSSDDEGGPRTLGGDGHRAEEASKDKE	VKSATLSSTESTASGMQDEVRAVGEEQRSEEPKRRVDTSVSWEALICVGSSKKRARKASSSDDEGGPRTLGGDGHRAEEASKDKE
CACGGCGTCTGGAATGCAGGATGAGGTCAGAGCGGTTGGCGAGGAGCAAAGGTCAGAGGAGCCAAAGCGCAGGGTGGATACTTCAGTGTCTTGGGAGGCGTTGATTTGTGTCGGATCGTCCAAGAAGAGAGCGAGGAAGG	CACGGCGTCTGGAATGCAGGATGAGGTCAGAGCGGTTGGCGAGGGGCAAAGGTCAGAGGAGCCAAAGCGCAGGGTGGATGCTGCAGTGGCTTGGGAGGCGTTGATTTGTGTCGGAGCGGCCAAGAAGAGAGCGAGGAAGG	2	Base Change	VKSATLSSTESTASGMQDEVRAVGEEQRSEEPKRRVDAAVAWEALICVGAAKKRARKASSSDDEGGPRTLGGDGHRAEEASKDKE	VKSATLSSTESTASGMQDEVRAVGEEQRSEEPKRRVDTSVSWEALICVGSSKKRARKASSSDDEGGPRTLGGDGHRAEEASKDKE
CACGGCGTCTGGAATGCAGGATGAGGTCAGAGCGGTTGGCGAGGAGCAAAGGTCAGAGGAGCCAAAGCGCAGGGTGGATACTTCAGTGTCTTGGGAGGCGTTGATTTGTGTCGGATCGTCCAAGAAGAGAGCGAGGAAGG	CACGGCGTCTGGAATGCAGGATGAGGTCAGAGCGGTTGGCGAGGAGCAAAGGTCAGAGGAGCCAAAGCGCAGGGTAGATACTTCAGTGTCTTGGGAGGCGTTGATTTGTGTCGGATCGTCCAAGAAGAGAGCGAGGAAGG	2	WT	VKSATLSSTESTASGMQDEVRAVGEEQRSEEPKRRVDTSVSWEALICVGSSKKRARKASSSDDEGGPRTLGGDGHRAEEASKDKE	VKSATLSSTESTASGMQDEVRAVGEEQRSEEPKRRVDTSVSWEALICVGSSKKRARKASSSDDEGGPRTLGGDGHRAEEASKDKE
CACGGCGTCTGGAATGCAGGATGAGGTCAGAGCGGTTGGCGAGGAGCAAAGGTCAGAGGAGCCAAAGCGCAGGGTGGATACTTCAGTGTCTTGGGAGGCGTTGATTTGTGTCGGATCGTCCAAGAAGAGAGCGAGGAAGG	CACGGCGTCTGGAATGCAGGATGAGGTCAGAGCGGTTGGCGAGGAGCAAAGGTCAGAGGAGCCAAAGCGCAGGGTGGATACTTCAGTGTCTTGGGAGGCGTTGATTTGTGTCGGATCGTCCAAGAAGAGAGCGAGGGAGG	2	WT	VKSATLSSTESTASGMQDEVRAVGEEQRSEEPKRRVDTSVSWEALICVGSSKKRARKASSSDDEGGPRTLGGDGHRAEEASKDKE	VKSATLSSTESTASGMQDEVRAVGEEQRSEEPKRRVDTSVSWEALICVGSSKKRARKASSSDDEGGPRTLGGDGHRAEEASKDKE
CACGGCGTCTGGAATGCAGGATGAGGTCAGAGCGGTTGGCGAGGAGCAAAGGTCAGAGGAGCCAAAGCGCAGGGTGGATACTTCAGTGTCTTGGGAGGCGTTGATTTGTGTCGGATCGTCCAAGAAGAGAGCGAGGAAGG	CACGGCGTCTGGAATGCAGGATGAGGTCAGAGCGGTTGGCGAGGAGCAAAGGTCAGAGGAGCCAAAGCGCAGGGTGGATACTTCAGCGTCTTGGGAGGCGTTGATTTGTGTCGGATCGTCCAAGAAGAGAGCGAGGAAGG	2	WT	VKSATLSSTESTASGMQDEVRAVGEEQRSEEPKRRVDTSVSWEALICVGSSKKRARKASSSDDEGGPRTLGGDGHRAEEASKDKE	VKSATLSSTESTASGMQDEVRAVGEEQRSEEPKRRVDTSVSWEALICVGSSKKRARKASSSDDEGGPRTLGGDGHRAEEASKDKE
CACGGCGTCTGGAATGCAGGATGAGGTCAGAGCGGTTGGCGAGGAGCAAAGGTCAGAGGAGCCAAAGCGCAGGGTGGATACTTCAGTGTCTTGGGAGGCGTTGATTTGTGTCGGATCGTCCAAGAAGAGAGCGAGGAAGG	CACGGCGTCTGGAATGCAGGATGAGGTCAGAGCGGTTGGCGAGGAGCAAAGGTCAGAGAAGCCAAAGCGCAGGGTGGATACTTCAGTGTCTTGGGAGGCGTTGATTTGTGTCGGATCGTCCAAGAAGAGAGCGAGGAAGG	2	WT	VKSATLSSTESTASGMQDEVRAVGEEQRSEEPKRRVDTSVSWEALICVGSSKKRARKASSSDDEGGPRTLGGDGHRAEEASKDKE	VKSATLSSTESTASGMQDEVRAVGEEQRSEEPKRRVDTSVSWEALICVGSSKKRARKASSSDDEGGPRTLGGDGHRAEEASKDKE
CACGGCGTCTGGAATGCAGGATGAGGTCAGAGCGGTTGGCGAGGAGCAAAGGTCAGAGGAGCCAAAGCGCAGGGTGGATACTTCAGTGTCTTGGGAGGCGTTGATTTGTGTCGGATCGTCCAAGAAGAGAGCGAGGAAGG	CACGGCGTCTGGAATGCATGATGAGGTCAGAGCGGTTGGCGAGGAGCAAAGGTCAGAGGAGCCAAAGCGCAGGGTGGATACTTCAGTGTCTTGGGAGGCGTTGATTTGTGTCGGATCGTCCAAGAAGAGAGCGAGGAAGG	2	WT	VKSATLSSTESTASGMQDEVRAVGEEQRSEEPKRRVDTSVSWEALICVGSSKKRARKASSSDDEGGPRTLGGDGHRAEEASKDKE	VKSATLSSTESTASGMQDEVRAVGEEQRSEEPKRRVDTSVSWEALICVGSSKKRARKASSSDDEGGPRTLGGDGHRAEEASKDKE
CACGGCGTCTGGAATGCAGGATGAGGTCAGAGCGGTTGGCGAGGAGCAAAGGTCAGAGGAGCCAAAGCGCAGGGTGGATACTTCAGTGTCTTGGGAGGCGTTGATTTGTGTCGGATCGTCCAAGAAGAGAGCGAGGAAGG	CACGGCGTCTGGAATGCAGGATGAGGTCAGAGCGGTTGGCGAGGAGCAAAGGTCAGAGGAGCCAAAGCGCAGGGTGGATACTTCAGTGTCTTGGGAGGCATTGATTTGTGTCGGATCGTCCAAGAAGAGAGCGAGGAAGG	2	WT	VKSATLSSTESTASGMQDEVRAVGEEQRSEEPKRRVDTSVSWEALICVGSSKKRARKASSSDDEGGPRTLGGDGHRAEEASKDKE	VKSATLSSTESTASGMQDEVRAVGEEQRSEEPKRRVDTSVSWEALICVGSSKKRARKASSSDDEGGPRTLGGDGHRAEEASKDKE
CACGGCGTCTGGAATGCAGGATGAGGTCAGAGCGGTTGGCGAGGAGCAAAGGTCAGAGGAGCCAAAGCGCAGGGTGGATACTTCAGTGTCTTGGGAGGCGTTGATTTGTGTCGGATCGTCCAAGAAGAGAGCGAGGAAGG	CGCGGCGTCTGGAATGCAGGATGAGGTCAGAGCGGTTGGCGAGGAGCAAAGGTCAGAGGAGCCAAAGCGCAGGGTGGATACTTCAGTGTCTTGGGAGGCGTTGATTTGTGTCGGATCGTCCAAGAAGAGAGCGAGGAAGG	2	WT	VKSATLSSTESTASGMQDEVRAVGEEQRSEEPKRRVDTSVSWEALICVGSSKKRARKASSSDDEGGPRTLGGDGHRAEEASKDKE	VKSATLSSTESTASGMQDEVRAVGEEQRSEEPKRRVDTSVSWEALICVGSSKKRARKASSSDDEGGPRTLGGDGHRAEEASKDKE
CACGGCGTCTGGAATGCAGGATGAGGTCAGAGCGGTTGGCGAGGAGCAAAGGTCAGAGGAGCCAAAGCGCAGGGTGGATACTTCAGTGTCTTGGGAGGCGTTGATTTGTGTCGGATCGTCCAAGAAGAGAGCGAGGAAGG	CACGGCGTCTGGAATGCAGGATGAGGTCAGAGCGGTTGGCGAGGAGCAAAGGTCAGAGGAGCCAAAGCGCAGGGTGGATACTTCAGTGTCTTGGGAGGCGTTGATTTGTGTCGGATCGTCCAAGAAGAGAGCGAGGATGG	2	WT	VKSATLSSTESTASGMQDEVRAVGEEQRSEEPKRRVDTSVSWEALICVGSSKKRARKASSSDDEGGPRTLGGDGHRAEEASKDKE	VKSATLSSTESTASGMQDEVRAVGEEQRSEEPKRRVDTSVSWEALICVGSSKKRARKASSSDDEGGPRTLGGDGHRAEEASKDKE
CACGGCGTCTGGAATGCAGGATGAGGTCAGAGCGGTTGGCGAGGAGCAAAGGTCAGAGGAGCCAAAGCGCAGGGTGGATACTTCAGTGTCTTGGGAGGCGTTGATTTGTGTCGGATCGTCCAAGAAGAGAGCGAGGAAGG	CACGGCGCCTGGAATGCAGGATGAGGTCAGAGCGGTTGGCGAGGAGCAAAGGTCAGAGGAGCCAAAGCGCAGGGTGGATACTTCAGTGTCTTGGGAGGCGTTGATTTGTGTCGGAGCGGCCAAGAAGAGAGCGAGGAAGG	2	Base Change	VKSATLSSTESTASGMQDEVRAVGEEQRSEEPKRRVDTSVSWEALICVGAAKKRARKASSSDDEGGPRTLGGDGHRAEEASKDKE
CACGGCGTCTGGAATGCAGGATGAGGTCAGAGCGGTTGGCGAGGAGCAAAGGTCAGAGGAGCCAAAGCGCAGGGTGGATACTTCAGTGTCTTGGGAGGCGTTGATTTGTGTCGGATCGTCCAAGAAGAGAGCGAGGAAGG	CACGGCGTCTGGAATGCAGGATGAGGTCAGAGCGGTTGGCGAGGAGCAAAGGTCAGAGGAGCCAAAGCGCAGGGTGGATACTGCAGTGTCTTGGGAGGCGTTGATTTGTGTCGGATCGTCCAAGAAGAGAGCGAGGAAGG	2	WT	VKSATLSSTESTASGMQDEVRAVGEEQRSEEPKRRVDTSVSWEALICVGSSKKRARKASSSDDEGGPRTLGGDGHRAEEASKDKE	VKSATLSSTESTASGMQDEVRAVGEEQRSEEPKRRVDTSVSWEALICVGSSKKRARKASSSDDEGGPRTLGGDGHRAEEASKDKE

## Sheet: A3-CCL4+EV
Reference	Target sequence	Read count	Type	TargetAA	ReferenceAA
CACGGCGTCTGGAATGCAGGATGAGGTCAGAGCGGTTGGCGAGGAGCAAAGGTCAGAGGAGCCAAAGCGCAGGGTGGATACTTCAGTGTCTTGGGAGGCGTTGATTTGTGTCGGATCGTCCAAGAAGAGAGCGAGGAAGG	CACGGCGTCTGGAATGCAGGATGAGGTCAGAGCGGTTGGCGAGGAGCAAAGGTCAGAGGAGCCAAAGCGCAGGGTGGATACTTCAGTGTCTTGGGAGGCGTTGATTTGTGTCGGATCGTCCAAGAAGAGAGCGAGGAAGG	21218	WT	VKSATLSSTESTASGMQDEVRAVGEEQRSEEPKRRVDTSVSWEALICVGSSKKRARKASSSDDEGGPRTLGGDGHRAEEASKDKE	VKSATLSSTESTASGMQDEVRAVGEEQRSEEPKRRVDTSVSWEALICVGSSKKRARKASSSDDEGGPRTLGGDGHRAEEASKDKE
CACGGCGTCTGGAATGCAGGATGAGGTCAGAGCGGTTGGCGAGGAGCAAAGGTCAGAGGAGCCAAAGCGCAGGGTGGATACTTCAGTGTCTTGGGAGGCGTTGATTTGTGTCGGATCGTCCAAGAAGAGAGCGAGGAAGG	CACGGCGTCTGGAATGCAGGATGAGGTCAGAGCGGTTGGCGAGGAGCAAAGGTCAGAGGAGCCAAAGCGCAGGGTGGATACTTCAGTGTCTTGGGGGGCGTTGATTTGTGTCGGATCGTCCAAGAAGAGAGCGAGGAAGG	70	WT	VKSATLSSTESTASGMQDEVRAVGEEQRSEEPKRRVDTSVSWEALICVGSSKKRARKASSSDDEGGPRTLGGDGHRAEEASKDKE	VKSATLSSTESTASGMQDEVRAVGEEQRSEEPKRRVDTSVSWEALICVGSSKKRARKASSSDDEGGPRTLGGDGHRAEEASKDKE
CACGGCGTCTGGAATGCAGGATGAGGTCAGAGCGGTTGGCGAGGAGCAAAGGTCAGAGGAGCCAAAGCGCAGGGTGGATACTTCAGTGTCTTGGGAGGCGTTGATTTGTGTCGGATCGTCCAAGAAGAGAGCGAGGAAGG	CACGGCGTCTGGAATGCAGGATGAGGTCAGAGCGGTTGGCGAGGAGCAAAGGTCAGAGGAGCCAAAGCGCAGGGTGGATACTTCAGTGTCTTGGGAGGCGCTGATTTGTGTCGGATCGTCCAAGAAGAGAGCGAGGAAGG	66	WT	VKSATLSSTESTASGMQDEVRAVGEEQRSEEPKRRVDTSVSWEALICVGSSKKRARKASSSDDEGGPRTLGGDGHRAEEASKDKE	VKSATLSSTESTASGMQDEVRAVGEEQRSEEPKRRVDTSVSWEALICVGSSKKRARKASSSDDEGGPRTLGGDGHRAEEASKDKE
CACGGCGTCTGGAATGCAGGATGAGGTCAGAGCGGTTGGCGAGGAGCAAAGGTCAGAGGAGCCAAAGCGCAGGGTGGATACTTCAGTGTCTTGGGAGGCGTTGATTTGTGTCGGATCGTCCAAGAAGAGAGCGAGGAAGG	CACGGCGTCTGGAATGCAGGATGAGGTCAGAGCGGTTGGCGAGGAGCAAAGGTCAGAGGAGCCAAAGCGCAGGGTGGATACCTCAGTGTCTTGGGAGGCGTTGATTTGTGTCGGATCGTCCAAGAAGAGAGCGAGGAAGG	64	WT	VKSATLSSTESTASGMQDEVRAVGEEQRSEEPKRRVDTSVSWEALICVGSSKKRARKASSSDDEGGPRTLGGDGHRAEEASKDKE	VKSATLSSTESTASGMQDEVRAVGEEQRSEEPKRRVDTSVSWEALICVGSSKKRARKASSSDDEGGPRTLGGDGHRAEEASKDKE
CACGGCGTCTGGAATGCAGGATGAGGTCAGAGCGGTTGGCGAGGAGCAAAGGTCAGAGGAGCCAAAGCGCAGGGTGGATACTTCAGTGTCTTGGGAGGCGTTGATTTGTGTCGGATCGTCCAAGAAGAGAGCGAGGAAGG	CACGGCGTCTGGAATGCAGGATGAGGTCAGAGCGGTTGGCGAGGAGCAAAGGTCAGAGGAGCCAAAGCGCAGGGTGGATACTTCAGTGTCTTGGGAGGCGTTGATTTGTGTCGGATCGTCCAAGGAGAGAGCGAGGAAGG	56	WT	VKSATLSSTESTASGMQDEVRAVGEEQRSEEPKRRVDTSVSWEALICVGSSKKRARKASSSDDEGGPRTLGGDGHRAEEASKDKE	VKSATLSSTESTASGMQDEVRAVGEEQRSEEPKRRVDTSVSWEALICVGSSKKRARKASSSDDEGGPRTLGGDGHRAEEASKDKE
CACGGCGTCTGGAATGCAGGATGAGGTCAGAGCGGTTGGCGAGGAGCAAAGGTCAGAGGAGCCAAAGCGCAGGGTGGATACTTCAGTGTCTTGGGAGGCGTTGATTTGTGTCGGATCGTCCAAGAAGAGAGCGAGGAAGG	CACGGCGTCTGGAATGCAGGATGAGGTCAGAGCGGTTGGCGAGGAGCAAAGGTCAGAGGAGCCAAAGCGCAGGGTGGATACTTCAGTGTCTTGGGAGGCGTTGATTTGTGTCGGATCGTCCAAGAAGAGAGCGAGGGAGG	54	WT	VKSATLSSTESTASGMQDEVRAVGEEQRSEEPKRRVDTSVSWEALICVGSSKKRARKASSSDDEGGPRTLGGDGHRAEEASKDKE	VKSATLSSTESTASGMQDEVRAVGEEQRSEEPKRRVDTSVSWEALICVGSSKKRARKASSSDDEGGPRTLGGDGHRAEEASKDKE
CACGGCGTCTGGAATGCAGGATGAGGTCAGAGCGGTTGGCGAGGAGCAAAGGTCAGAGGAGCCAAAGCGCAGGGTGGATACTTCAGTGTCTTGGGAGGCGTTGATTTGTGTCGGATCGTCCAAGAAGAGAGCGAGGAAGG	CACGGCGTCTGGAATGCAGGATGAGGTCAGAGCGGTTGGCGAGGAGCAAAGGTCAGAGGAGCCAAAGCGCAGGGTGGATACTTCAGTGTCTTGGGAGGCGTTGATCTGTGTCGGATCGTCCAAGAAGAGAGCGAGGAAGG	54	WT	VKSATLSSTESTASGMQDEVRAVGEEQRSEEPKRRVDTSVSWEALICVGSSKKRARKASSSDDEGGPRTLGGDGHRAEEASKDKE	VKSATLSSTESTASGMQDEVRAVGEEQRSEEPKRRVDTSVSWEALICVGSSKKRARKASSSDDEGGPRTLGGDGHRAEEASKDKE
CACGGCGTCTGGAATGCAGGATGAGGTCAGAGCGGTTGGCGAGGAGCAAAGGTCAGAGGAGCCAAAGCGCAGGGTGGATACTTCAGTGTCTTGGGAGGCGTTGATTTGTGTCGGATCGTCCAAGAAGAGAGCGAGGAAGG	CACGGCGTCTGGAATGCAGGATGAGGTCAGAGCGGTTGGCGAGGAGCAAAGGTCAGAGGAGCCAAAGCGCAGGGTGGATACTTCAGTGTCTTGGGAGGCGTTGATTTGTGTCGGATCGCCCAAGAAGAGAGCGAGGAAGG	53	WT	VKSATLSSTESTASGMQDEVRAVGEEQRSEEPKRRVDTSVSWEALICVGSSKKRARKASSSDDEGGPRTLGGDGHRAEEASKDKE	VKSATLSSTESTASGMQDEVRAVGEEQRSEEPKRRVDTSVSWEALICVGSSKKRARKASSSDDEGGPRTLGGDGHRAEEASKDKE
CACGGCGTCTGGAATGCAGGATGAGGTCAGAGCGGTTGGCGAGGAGCAAAGGTCAGAGGAGCCAAAGCGCAGGGTGGATACTTCAGTGTCTTGGGAGGCGTTGATTTGTGTCGGATCGTCCAAGAAGAGAGCGAGGAAGG	CACGGCGTCTGGAGTGCAGGATGAGGTCAGAGCGGTTGGCGAGGAGCAAAGGTCAGAGGAGCCAAAGCGCAGGGTGGATACTTCAGTGTCTTGGGAGGCGTTGATTTGTGTCGGATCGTCCAAGAAGAGAGCGAGGAAGG	53	WT	VKSATLSSTESTASGMQDEVRAVGEEQRSEEPKRRVDTSVSWEALICVGSSKKRARKASSSDDEGGPRTLGGDGHRAEEASKDKE	VKSATLSSTESTASGMQDEVRAVGEEQRSEEPKRRVDTSVSWEALICVGSSKKRARKASSSDDEGGPRTLGGDGHRAEEASKDKE
CACGGCGTCTGGAATGCAGGATGAGGTCAGAGCGGTTGGCGAGGAGCAAAGGTCAGAGGAGCCAAAGCGCAGGGTGGATACTTCAGTGTCTTGGGAGGCGTTGATTTGTGTCGGATCGTCCAAGAAGAGAGCGAGGAAGG	CACGGCGTCTGGAATGCGGGATGAGGTCAGAGCGGTTGGCGAGGAGCAAAGGTCAGAGGAGCCAAAGCGCAGGGTGGATACTTCAGTGTCTTGGGAGGCGTTGATTTGTGTCGGATCGTCCAAGAAGAGAGCGAGGAAGG	53	WT	VKSATLSSTESTASGMQDEVRAVGEEQRSEEPKRRVDTSVSWEALICVGSSKKRARKASSSDDEGGPRTLGGDGHRAEEASKDKE	VKSATLSSTESTASGMQDEVRAVGEEQRSEEPKRRVDTSVSWEALICVGSSKKRARKASSSDDEGGPRTLGGDGHRAEEASKDKE
CACGGCGTCTGGAATGCAGGATGAGGTCAGAGCGGTTGGCGAGGAGCAAAGGTCAGAGGAGCCAAAGCGCAGGGTGGATACTTCAGTGTCTTGGGAGGCGTTGATTTGTGTCGGATCGTCCAAGAAGAGAGCGAGGAAGG	CACGGCGTCTGGAATGCAGGATGAGGTCAGAGCGGTTGGCGAGGAGCAAAGGTCAGAGGAGCCAAAGCGCAGGGTGGATACTTCAGTGTCTTGGGAGGCGTTGATTTGTGTCGGATCGTCCAAGAGGAGAGCGAGGAAGG	51	WT	VKSATLSSTESTASGMQDEVRAVGEEQRSEEPKRRVDTSVSWEALICVGSSKKRARKASSSDDEGGPRTLGGDGHRAEEASKDKE	VKSATLSSTESTASGMQDEVRAVGEEQRSEEPKRRVDTSVSWEALICVGSSKKRARKASSSDDEGGPRTLGGDGHRAEEASKDKE
CACGGCGTCTGGAATGCAGGATGAGGTCAGAGCGGTTGGCGAGGAGCAAAGGTCAGAGGAGCCAAAGCGCAGGGTGGATACTTCAGTGTCTTGGGAGGCGTTGATTTGTGTCGGATCGTCCAAGAAGAGAGCGAGGAAGG	CACGGCGTCTGGAATGCAGGATGAGGTCAGAGCGGTTGGCGGGGAGCAAAGGTCAGAGGAGCCAAAGCGCAGGGTGGATACTTCAGTGTCTTGGGAGGCGTTGATTTGTGTCGGATCGTCCAAGAAGAGAGCGAGGAAGG	50	WT	VKSATLSSTESTASGMQDEVRAVGEEQRSEEPKRRVDTSVSWEALICVGSSKKRARKASSSDDEGGPRTLGGDGHRAEEASKDKE	VKSATLSSTESTASGMQDEVRAVGEEQRSEEPKRRVDTSVSWEALICVGSSKKRARKASSSDDEGGPRTLGGDGHRAEEASKDKE
CACGGCGTCTGGAATGCAGGATGAGGTCAGAGCGGTTGGCGAGGAGCAAAGGTCAGAGGAGCCAAAGCGCAGGGTGGATACTTCAGTGTCTTGGGAGGCGTTGATTTGTGTCGGATCGTCCAAGAAGAGAGCGAGGAAGG	CACGGCGTCTGGAATGCAGGATGAGGTCAGAGCGGTTGGCGAGGAGCAAAGGCCAGAGGAGCCAAAGCGCAGGGTGGATACTTCAGTGTCTTGGGAGGCGTTGATTTGTGTCGGATCGTCCAAGAAGAGAGCGAGGAAGG	50	WT	VKSATLSSTESTASGMQDEVRAVGEEQRSEEPKRRVDTSVSWEALICVGSSKKRARKASSSDDEGGPRTLGGDGHRAEEASKDKE	VKSATLSSTESTASGMQDEVRAVGEEQRSEEPKRRVDTSVSWEALICVGSSKKRARKASSSDDEGGPRTLGGDGHRAEEASKDKE
CACGGCGTCTGGAATGCAGGATGAGGTCAGAGCGGTTGGCGAGGAGCAAAGGTCAGAGGAGCCAAAGCGCAGGGTGGATACTTCAGTGTCTTGGGAGGCGTTGATTTGTGTCGGATCGTCCAAGAAGAGAGCGAGGAAGG	CACGGCGTCTGGAATGCAGGATGAGGTCAGAGCGGTTGGCGAGGAGCAAAGGTCAGAGGAGCCAAAGCGCAGGGTGGATACTTCAGTGTCTTGGGAGGCGTTGATTTGTGTCGGATCGTCCAAGAAGAGGGCGAGGAAGG	50	WT	VKSATLSSTESTASGMQDEVRAVGEEQRSEEPKRRVDTSVSWEALICVGSSKKRARKASSSDDEGGPRTLGGDGHRAEEASKDKE	VKSATLSSTESTASGMQDEVRAVGEEQRSEEPKRRVDTSVSWEALICVGSSKKRARKASSSDDEGGPRTLGGDGHRAEEASKDKE
CACGGCGTCTGGAATGCAGGATGAGGTCAGAGCGGTTGGCGAGGAGCAAAGGTCAGAGGAGCCAAAGCGCAGGGTGGATACTTCAGTGTCTTGGGAGGCGTTGATTTGTGTCGGATCGTCCAAGAAGAGAGCGAGGAAGG	CACGGCGTCTGGAATGCAGGATGAGGTCAGAGCGGTTGGCGAGGAGCAAAGGTCAGAGGAGCCAAAGCGCAGGGTGGATACTTCAGTGTCTTGGGAGGCGTTGATTTGTGTCGGATCGTCCAAGAAGAGAGCGGGGAAGG	48	WT	VKSATLSSTESTASGMQDEVRAVGEEQRSEEPKRRVDTSVSWEALICVGSSKKRARKASSSDDEGGPRTLGGDGHRAEEASKDKE	VKSATLSSTESTASGMQDEVRAVGEEQRSEEPKRRVDTSVSWEALICVGSSKKRARKASSSDDEGGPRTLGGDGHRAEEASKDKE
CACGGCGTCTGGAATGCAGGATGAGGTCAGAGCGGTTGGCGAGGAGCAAAGGTCAGAGGAGCCAAAGCGCAGGGTGGATACTTCAGTGTCTTGGGAGGCGTTGATTTGTGTCGGATCGTCCAAGAAGAGAGCGAGGAAGG	CACGGCGTCTGGAATGCAGGATGAGGTCAGAGCGGTTGGCGAGGAGCAAAGGTCAGAGGAGCCAAAGCGCAGGGTGGGTACTTCAGTGTCTTGGGAGGCGTTGATTTGTGTCGGATCGTCCAAGAAGAGAGCGAGGAAGG	48	WT	VKSATLSSTESTASGMQDEVRAVGEEQRSEEPKRRVDTSVSWEALICVGSSKKRARKASSSDDEGGPRTLGGDGHRAEEASKDKE	VKSATLSSTESTASGMQDEVRAVGEEQRSEEPKRRVDTSVSWEALICVGSSKKRARKASSSDDEGGPRTLGGDGHRAEEASKDKE
CACGGCGTCTGGAATGCAGGATGAGGTCAGAGCGGTTGGCGAGGAGCAAAGGTCAGAGGAGCCAAAGCGCAGGGTGGATACTTCAGTGTCTTGGGAGGCGTTGATTTGTGTCGGATCGTCCAAGAAGAGAGCGAGGAAGG	CACGGCGCCTGGAATGCAGGATGAGGTCAGAGCGGTTGGCGAGGAGCAAAGGTCAGAGGAGCCAAAGCGCAGGGTGGATACTTCAGTGTCTTGGGAGGCGTTGATTTGTGTCGGATCGTCCAAGAAGAGAGCGAGGAAGG	47	WT	VKSATLSSTESTASGMQDEVRAVGEEQRSEEPKRRVDTSVSWEALICVGSSKKRARKASSSDDEGGPRTLGGDGHRAEEASKDKE	VKSATLSSTESTASGMQDEVRAVGEEQRSEEPKRRVDTSVSWEALICVGSSKKRARKASSSDDEGGPRTLGGDGHRAEEASKDKE
CACGGCGTCTGGAATGCAGGATGAGGTCAGAGCGGTTGGCGAGGAGCAAAGGTCAGAGGAGCCAAAGCGCAGGGTGGATACTTCAGTGTCTTGGGAGGCGTTGATTTGTGTCGGATCGTCCAAGAAGAGAGCGAGGAAGG	CACGGCGTCTGGAATGCAGGATGAGGTCAGAGCGGTTGGCGAGGAGCAAAGGTCAGAGGAGCCAAAGCGCAGGGTGGATACTTCAGTGTCTTGGGAGGCGTTGACTTGTGTCGGATCGTCCAAGAAGAGAGCGAGGAAGG	47	WT	VKSATLSSTESTASGMQDEVRAVGEEQRSEEPKRRVDTSVSWEALICVGSSKKRARKASSSDDEGGPRTLGGDGHRAEEASKDKE	VKSATLSSTESTASGMQDEVRAVGEEQRSEEPKRRVDTSVSWEALICVGSSKKRARKASSSDDEGGPRTLGGDGHRAEEASKDKE
CACGGCGTCTGGAATGCAGGATGAGGTCAGAGCGGTTGGCGAGGAGCAAAGGTCAGAGGAGCCAAAGCGCAGGGTGGATACTTCAGTGTCTTGGGAGGCGTTGATTTGTGTCGGATCGTCCAAGAAGAGAGCGAGGAAGG	CACGGCGTCTGGAATGCAGGGTGAGGTCAGAGCGGTTGGCGAGGAGCAAAGGTCAGAGGAGCCAAAGCGCAGGGTGGATACTTCAGTGTCTTGGGAGGCGTTGATTTGTGTCGGATCGTCCAAGAAGAGAGCGAGGAAGG	47	WT	VKSATLSSTESTASGMQDEVRAVGEEQRSEEPKRRVDTSVSWEALICVGSSKKRARKASSSDDEGGPRTLGGDGHRAEEASKDKE	VKSATLSSTESTASGMQDEVRAVGEEQRSEEPKRRVDTSVSWEALICVGSSKKRARKASSSDDEGGPRTLGGDGHRAEEASKDKE
CACGGCGTCTGGAATGCAGGATGAGGTCAGAGCGGTTGGCGAGGAGCAAAGGTCAGAGGAGCCAAAGCGCAGGGTGGATACTTCAGTGTCTTGGGAGGCGTTGATTTGTGTCGGATCGTCCAAGAAGAGAGCGAGGAAGG	CACGGCGTCTGGAATGCAGGATGAGGTCAGAGCGGTTGGCGAGGAGCAAAGGTCAGAGGAGCCAAAGCGCAGGGTGGATACTCCAGTGTCTTGGGAGGCGTTGATTTGTGTCGGATCGTCCAAGAAGAGAGCGAGGAAGG	46	WT	VKSATLSSTESTASGMQDEVRAVGEEQRSEEPKRRVDTSVSWEALICVGSSKKRARKASSSDDEGGPRTLGGDGHRAEEASKDKE	VKSATLSSTESTASGMQDEVRAVGEEQRSEEPKRRVDTSVSWEALICVGSSKKRARKASSSDDEGGPRTLGGDGHRAEEASKDKE
CACGGCGTCTGGAATGCAGGATGAGGTCAGAGCGGTTGGCGAGGAGCAAAGGTCAGAGGAGCCAAAGCGCAGGGTGGATACTTCAGTGTCTTGGGAGGCGTTGATTTGTGTCGGATCGTCCAAGAAGAGAGCGAGGAAGG	CACGGCGTCTGGAATGCAGGATGAGGTCAGAGCGGTTGGCGAGGAGCAAAGGTCAGAGGAGCCAAAGCGCAGGGTGGATACTTCAGTGTCTTGGGAGGCGTTGATTTGTGTCGGATCGTCCAAGAAGAGAGCGAGGAGGG	46	WT	VKSATLSSTESTASGMQDEVRAVGEEQRSEEPKRRVDTSVSWEALICVGSSKKRARKASSSDDEGGPRTLGGDGHRAEEASKDKE	VKSATLSSTESTASGMQDEVRAVGEEQRSEEPKRRVDTSVSWEALICVGSSKKRARKASSSDDEGGPRTLGGDGHRAEEASKDKE
CACGGCGTCTGGAATGCAGGATGAGGTCAGAGCGGTTGGCGAGGAGCAAAGGTCAGAGGAGCCAAAGCGCAGGGTGGATACTTCAGTGTCTTGGGAGGCGTTGATTTGTGTCGGATCGTCCAAGAAGAGAGCGAGGAAGG	CGCGGCGTCTGGAATGCAGGATGAGGTCAGAGCGGTTGGCGAGGAGCAAAGGTCAGAGGAGCCAAAGCGCAGGGTGGATACTTCAGTGTCTTGGGAGGCGTTGATTTGTGTCGGATCGTCCAAGAAGAGAGCGAGGAAGG	44	WT	VKSATLSSTESTASGMQDEVRAVGEEQRSEEPKRRVDTSVSWEALICVGSSKKRARKASSSDDEGGPRTLGGDGHRAEEASKDKE	VKSATLSSTESTASGMQDEVRAVGEEQRSEEPKRRVDTSVSWEALICVGSSKKRARKASSSDDEGGPRTLGGDGHRAEEASKDKE
CACGGCGTCTGGAATGCAGGATGAGGTCAGAGCGGTTGGCGAGGAGCAAAGGTCAGAGGAGCCAAAGCGCAGGGTGGATACTTCAGTGTCTTGGGAGGCGTTGATTTGTGTCGGATCGTCCAAGAAGAGAGCGAGGAAGG	CACGGCGTCTGGAATGCAGGATGAGGTCAGAGCGGTTGGCGAGGAGCAAAGGTCAGAGGGGCCAAAGCGCAGGGTGGATACTTCAGTGTCTTGGGAGGCGTTGATTTGTGTCGGATCGTCCAAGAAGAGAGCGAGGAAGG	43	WT	VKSATLSSTESTASGMQDEVRAVGEEQRSEEPKRRVDTSVSWEALICVGSSKKRARKASSSDDEGGPRTLGGDGHRAEEASKDKE	VKSATLSSTESTASGMQDEVRAVGEEQRSEEPKRRVDTSVSWEALICVGSSKKRARKASSSDDEGGPRTLGGDGHRAEEASKDKE
CACGGCGTCTGGAATGCAGGATGAGGTCAGAGCGGTTGGCGAGGAGCAAAGGTCAGAGGAGCCAAAGCGCAGGGTGGATACTTCAGTGTCTTGGGAGGCGTTGATTTGTGTCGGATCGTCCAAGAAGAGAGCGAGGAAGG	CACGGCGTCTGGAATGCAGGATGAGGTCAGAGCGGTTGGCGAGGAGCAAAGGTCAGAGGAGCCAAAGCGCAGGGTGGATACTTCAGTGTCTTGGGAGGCGTTGATTTGTGTCGGACCGTCCAAGAAGAGAGCGAGGAAGG	43	WT	VKSATLSSTESTASGMQDEVRAVGEEQRSEEPKRRVDTSVSWEALICVGSSKKRARKASSSDDEGGPRTLGGDGHRAEEASKDKE	VKSATLSSTESTASGMQDEVRAVGEEQRSEEPKRRVDTSVSWEALICVGSSKKRARKASSSDDEGGPRTLGGDGHRAEEASKDKE
CACGGCGTCTGGAATGCAGGATGAGGTCAGAGCGGTTGGCGAGGAGCAAAGGTCAGAGGAGCCAAAGCGCAGGGTGGATACTTCAGTGTCTTGGGAGGCGTTGATTTGTGTCGGATCGTCCAAGAAGAGAGCGAGGAAGG	CACGGCGTCTGGAATGCAGGATGAGGTCAGGGCGGTTGGCGAGGAGCAAAGGTCAGAGGAGCCAAAGCGCAGGGTGGATACTTCAGTGTCTTGGGAGGCGTTGATTTGTGTCGGATCGTCCAAGAAGAGAGCGAGGAAGG	42	WT	VKSATLSSTESTASGMQDEVRAVGEEQRSEEPKRRVDTSVSWEALICVGSSKKRARKASSSDDEGGPRTLGGDGHRAEEASKDKE	VKSATLSSTESTASGMQDEVRAVGEEQRSEEPKRRVDTSVSWEALICVGSSKKRARKASSSDDEGGPRTLGGDGHRAEEASKDKE
CACGGCGTCTGGAATGCAGGATGAGGTCAGAGCGGTTGGCGAGGAGCAAAGGTCAGAGGAGCCAAAGCGCAGGGTGGATACTTCAGTGTCTTGGGAGGCGTTGATTTGTGTCGGATCGTCCAAGAAGAGAGCGAGGAAGG	CACGGCGTCTGGAATGCAGGATGAGGTCAGAGCGGTTGGCGAGGAGCAGAGGTCAGAGGAGCCAAAGCGCAGGGTGGATACTTCAGTGTCTTGGGAGGCGTTGATTTGTGTCGGATCGTCCAAGAAGAGAGCGAGGAAGG	41	WT	VKSATLSSTESTASGMQDEVRAVGEEQRSEEPKRRVDTSVSWEALICVGSSKKRARKASSSDDEGGPRTLGGDGHRAEEASKDKE	VKSATLSSTESTASGMQDEVRAVGEEQRSEEPKRRVDTSVSWEALICVGSSKKRARKASSSDDEGGPRTLGGDGHRAEEASKDKE
CACGGCGTCTGGAATGCAGGATGAGGTCAGAGCGGTTGGCGAGGAGCAAAGGTCAGAGGAGCCAAAGCGCAGGGTGGATACTTCAGTGTCTTGGGAGGCGTTGATTTGTGTCGGATCGTCCAAGAAGAGAGCGAGGAAGG	CACGGCGTCTGGAATGCAGGATGAGGCCAGAGCGGTTGGCGAGGAGCAAAGGTCAGAGGAGCCAAAGCGCAGGGTGGATACTTCAGTGTCTTGGGAGGCGTTGATTTGTGTCGGATCGTCCAAGAAGAGAGCGAGGAAGG	41	WT	VKSATLSSTESTASGMQDEVRAVGEEQRSEEPKRRVDTSVSWEALICVGSSKKRARKASSSDDEGGPRTLGGDGHRAEEASKDKE	VKSATLSSTESTASGMQDEVRAVGEEQRSEEPKRRVDTSVSWEALICVGSSKKRARKASSSDDEGGPRTLGGDGHRAEEASKDKE
CACGGCGTCTGGAATGCAGGATGAGGTCAGAGCGGTTGGCGAGGAGCAAAGGTCAGAGGAGCCAAAGCGCAGGGTGGATACTTCAGTGTCTTGGGAGGCGTTGATTTGTGTCGGATCGTCCAAGAAGAGAGCGAGGAAGG	CACGGCGTCTGGAATGCAGGATGAGGTCGGAGCGGTTGGCGAGGAGCAAAGGTCAGAGGAGCCAAAGCGCAGGGTGGATACTTCAGTGTCTTGGGAGGCGTTGATTTGTGTCGGATCGTCCAAGAAGAGAGCGAGGAAGG	40	WT	VKSATLSSTESTASGMQDEVRAVGEEQRSEEPKRRVDTSVSWEALICVGSSKKRARKASSSDDEGGPRTLGGDGHRAEEASKDKE	VKSATLSSTESTASGMQDEVRAVGEEQRSEEPKRRVDTSVSWEALICVGSSKKRARKASSSDDEGGPRTLGGDGHRAEEASKDKE
CACGGCGTCTGGAATGCAGGATGAGGTCAGAGCGGTTGGCGAGGAGCAAAGGTCAGAGGAGCCAAAGCGCAGGGTGGATACTTCAGTGTCTTGGGAGGCGTTGATTTGTGTCGGATCGTCCAAGAAGAGAGCGAGGAAGG	CACGGCGTCTGGAATGCAGGATGAGGTCAGAGCGGTTGGCGAGGAGCAAAGGTCAGAGGAGCCAAAGCGCGGGGTGGATACTTCAGTGTCTTGGGAGGCGTTGATTTGTGTCGGATCGTCCAAGAAGAGAGCGAGGAAGG	40	WT	VKSATLSSTESTASGMQDEVRAVGEEQRSEEPKRRVDTSVSWEALICVGSSKKRARKASSSDDEGGPRTLGGDGHRAEEASKDKE	VKSATLSSTESTASGMQDEVRAVGEEQRSEEPKRRVDTSVSWEALICVGSSKKRARKASSSDDEGGPRTLGGDGHRAEEASKDKE
CACGGCGTCTGGAATGCAGGATGAGGTCAGAGCGGTTGGCGAGGAGCAAAGGTCAGAGGAGCCAAAGCGCAGGGTGGATACTTCAGTGTCTTGGGAGGCGTTGATTTGTGTCGGATCGTCCAAGAAGAGAGCGAGGAAGG	CACGGCGTCTGGAATGCAGGATGAGGTCAGAGCGGTTGGCGAGGAGCAAAGGTCAGAGGAGCCAAAGCGCAGGGTGGATACTTCAGTGTCTTGGGAGGCGTTGATTTGTGTCGGATCGTCCAAGAAGGGAGCGAGGAAGG	40	WT	VKSATLSSTESTASGMQDEVRAVGEEQRSEEPKRRVDTSVSWEALICVGSSKKRARKASSSDDEGGPRTLGGDGHRAEEASKDKE	VKSATLSSTESTASGMQDEVRAVGEEQRSEEPKRRVDTSVSWEALICVGSSKKRARKASSSDDEGGPRTLGGDGHRAEEASKDKE
CACGGCGTCTGGAATGCAGGATGAGGTCAGAGCGGTTGGCGAGGAGCAAAGGTCAGAGGAGCCAAAGCGCAGGGTGGATACTTCAGTGTCTTGGGAGGCGTTGATTTGTGTCGGATCGTCCAAGAAGAGAGCGAGGAAGG	CACGGCGTCTGGAATGCAGGATGAGGTCAGAGCGGTTGGCGAGGAGCAAAGGTCAGAGGAGCCAAAGCGCAGGGTGGATACTTCAGTGTCTTGGGAGGCGTTGATTTGTGTCGGATCGTCCGAGAAGAGAGCGAGGAAGG	39	WT	VKSATLSSTESTASGMQDEVRAVGEEQRSEEPKRRVDTSVSWEALICVGSSKKRARKASSSDDEGGPRTLGGDGHRAEEASKDKE	VKSATLSSTESTASGMQDEVRAVGEEQRSEEPKRRVDTSVSWEALICVGSSKKRARKASSSDDEGGPRTLGGDGHRAEEASKDKE
CACGGCGTCTGGAATGCAGGATGAGGTCAGAGCGGTTGGCGAGGAGCAAAGGTCAGAGGAGCCAAAGCGCAGGGTGGATACTTCAGTGTCTTGGGAGGCGTTGATTTGTGTCGGATCGTCCAAGAAGAGAGCGAGGAAGG	CACGGCGTCTGGGATGCAGGATGAGGTCAGAGCGGTTGGCGAGGAGCAAAGGTCAGAGGAGCCAAAGCGCAGGGTGGATACTTCAGTGTCTTGGGAGGCGTTGATTTGTGTCGGATCGTCCAAGAAGAGAGCGAGGAAGG	38	WT	VKSATLSSTESTASGMQDEVRAVGEEQRSEEPKRRVDTSVSWEALICVGSSKKRARKASSSDDEGGPRTLGGDGHRAEEASKDKE	VKSATLSSTESTASGMQDEVRAVGEEQRSEEPKRRVDTSVSWEALICVGSSKKRARKASSSDDEGGPRTLGGDGHRAEEASKDKE
CACGGCGTCTGGAATGCAGGATGAGGTCAGAGCGGTTGGCGAGGAGCAAAGGTCAGAGGAGCCAAAGCGCAGGGTGGATACTTCAGTGTCTTGGGAGGCGTTGATTTGTGTCGGATCGTCCAAGAAGAGAGCGAGGAAGG	CACGGCGTCTGGAATGCAGGATGAGGTCAGAGCGGTTGGCGAGGAGCAAGGGTCAGAGGAGCCAAAGCGCAGGGTGGATACTTCAGTGTCTTGGGAGGCGTTGATTTGTGTCGGATCGTCCAAGAAGAGAGCGAGGAAGG	38	WT	VKSATLSSTESTASGMQDEVRAVGEEQRSEEPKRRVDTSVSWEALICVGSSKKRARKASSSDDEGGPRTLGGDGHRAEEASKDKE	VKSATLSSTESTASGMQDEVRAVGEEQRSEEPKRRVDTSVSWEALICVGSSKKRARKASSSDDEGGPRTLGGDGHRAEEASKDKE
CACGGCGTCTGGAATGCAGGATGAGGTCAGAGCGGTTGGCGAGGAGCAAAGGTCAGAGGAGCCAAAGCGCAGGGTGGATACTTCAGTGTCTTGGGAGGCGTTGATTTGTGTCGGATCGTCCAAGAAGAGAGCGAGGAAGG	CACGGCGTCTGGAATGCAGGATGAGGTCAGAGCGGTTGGCGAGGAGCAAAGGTCAGAGGAGCCAAAGCGCAGGGTGGATACTTCAGTGTCTTGGGAGGCGTTGATTTGTGTCGGATCGTCCAGGAAGAGAGCGAGGAAGG	38	WT	VKSATLSSTESTASGMQDEVRAVGEEQRSEEPKRRVDTSVSWEALICVGSSKKRARKASSSDDEGGPRTLGGDGHRAEEASKDKE	VKSATLSSTESTASGMQDEVRAVGEEQRSEEPKRRVDTSVSWEALICVGSSKKRARKASSSDDEGGPRTLGGDGHRAEEASKDKE
CACGGCGTCTGGAATGCAGGATGAGGTCAGAGCGGTTGGCGAGGAGCAAAGGTCAGAGGAGCCAAAGCGCAGGGTGGATACTTCAGTGTCTTGGGAGGCGTTGATTTGTGTCGGATCGTCCAAGAAGAGAGCGAGGAAGG	CACGGCGTCTGGAATGCAGGATGAGGTCAGAGCGGTTGGCGAGGGGCAAAGGTCAGAGGAGCCAAAGCGCAGGGTGGATACTTCAGTGTCTTGGGAGGCGTTGATTTGTGTCGGATCGTCCAAGAAGAGAGCGAGGAAGG	38	WT	VKSATLSSTESTASGMQDEVRAVGEEQRSEEPKRRVDTSVSWEALICVGSSKKRARKASSSDDEGGPRTLGGDGHRAEEASKDKE	VKSATLSSTESTASGMQDEVRAVGEEQRSEEPKRRVDTSVSWEALICVGSSKKRARKASSSDDEGGPRTLGGDGHRAEEASKDKE
CACGGCGTCTGGAATGCAGGATGAGGTCAGAGCGGTTGGCGAGGAGCAAAGGTCAGAGGAGCCAAAGCGCAGGGTGGATACTTCAGTGTCTTGGGAGGCGTTGATTTGTGTCGGATCGTCCAAGAAGAGAGCGAGGAAGG	CACGGCGTCTGGAATGCAGGATGAGGTCAGAGCGGTTGGCGAGGAGCAAAGGTCAGAGGAGCCAAAGCGCAGGGTGGATACTTCGGTGTCTTGGGAGGCGTTGATTTGTGTCGGATCGTCCAAGAAGAGAGCGAGGAAGG	38	WT	VKSATLSSTESTASGMQDEVRAVGEEQRSEEPKRRVDTSVSWEALICVGSSKKRARKASSSDDEGGPRTLGGDGHRAEEASKDKE	VKSATLSSTESTASGMQDEVRAVGEEQRSEEPKRRVDTSVSWEALICVGSSKKRARKASSSDDEGGPRTLGGDGHRAEEASKDKE
CACGGCGTCTGGAATGCAGGATGAGGTCAGAGCGGTTGGCGAGGAGCAAAGGTCAGAGGAGCCAAAGCGCAGGGTGGATACTTCAGTGTCTTGGGAGGCGTTGATTTGTGTCGGATCGTCCAAGAAGAGAGCGAGGAAGG	CACGGCGTCTGGAATGCAGGATGAGGTCAGAGCGGTTGGCGAGGAGCAAAGGTCAGAGGAGCCAAAGCGCAGGGTGGATACTTCAGTGTCTTGGGAGGCGTTGATTCGTGTCGGATCGTCCAAGAAGAGAGCGAGGAAGG	38	WT	VKSATLSSTESTASGMQDEVRAVGEEQRSEEPKRRVDTSVSWEALICVGSSKKRARKASSSDDEGGPRTLGGDGHRAEEASKDKE	VKSATLSSTESTASGMQDEVRAVGEEQRSEEPKRRVDTSVSWEALICVGSSKKRARKASSSDDEGGPRTLGGDGHRAEEASKDKE
CACGGCGTCTGGAATGCAGGATGAGGTCAGAGCGGTTGGCGAGGAGCAAAGGTCAGAGGAGCCAAAGCGCAGGGTGGATACTTCAGTGTCTTGGGAGGCGTTGATTTGTGTCGGATCGTCCAAGAAGAGAGCGAGGAAGG	CACGGCGTCTGGAATGCAGGATGAGGTCAGAGCGGTTGGCGAGGAGCAAAGGTCAGAGGAGCCAAAGCGCAGGGTGGATACTTCAGTGCCTTGGGAGGCGTTGATTTGTGTCGGATCGTCCAAGAAGAGAGCGAGGAAGG	37	WT	VKSATLSSTESTASGMQDEVRAVGEEQRSEEPKRRVDTSVSWEALICVGSSKKRARKASSSDDEGGPRTLGGDGHRAEEASKDKE	VKSATLSSTESTASGMQDEVRAVGEEQRSEEPKRRVDTSVSWEALICVGSSKKRARKASSSDDEGGPRTLGGDGHRAEEASKDKE
CACGGCGTCTGGAATGCAGGATGAGGTCAGAGCGGTTGGCGAGGAGCAAAGGTCAGAGGAGCCAAAGCGCAGGGTGGATACTTCAGTGTCTTGGGAGGCGTTGATTTGTGTCGGATCGTCCAAGAAGAGAGCGAGGAAGG	CACGGCGTCTGGAATGCAGGATGAGGTCAGAGCGGTTGGCGAGGAGCAAAGGTCAGAGGAGCCGAAGCGCAGGGTGGATACTTCAGTGTCTTGGGAGGCGTTGATTTGTGTCGGATCGTCCAAGAAGAGAGCGAGGAAGG	37	WT	VKSATLSSTESTASGMQDEVRAVGEEQRSEEPKRRVDTSVSWEALICVGSSKKRARKASSSDDEGGPRTLGGDGHRAEEASKDKE	VKSATLSSTESTASGMQDEVRAVGEEQRSEEPKRRVDTSVSWEALICVGSSKKRARKASSSDDEGGPRTLGGDGHRAEEASKDKE
CACGGCGTCTGGAATGCAGGATGAGGTCAGAGCGGTTGGCGAGGAGCAAAGGTCAGAGGAGCCAAAGCGCAGGGTGGATACTTCAGTGTCTTGGGAGGCGTTGATTTGTGTCGGATCGTCCAAGAAGAGAGCGAGGAAGG	CACGGCGTCTGGAATGCAGGATGAGGTCAGAGCGGTTGGCGAGGAGCAAAGGTCAGAGGAGCCAAAGCGCAGGGTGGATACTTCAGTGTCTTGGGAGGCGTTGATTTGTGTCGGGTCGTCCAAGAAGAGAGCGAGGAAGG	36	WT	VKSATLSSTESTASGMQDEVRAVGEEQRSEEPKRRVDTSVSWEALICVGSSKKRARKASSSDDEGGPRTLGGDGHRAEEASKDKE	VKSATLSSTESTASGMQDEVRAVGEEQRSEEPKRRVDTSVSWEALICVGSSKKRARKASSSDDEGGPRTLGGDGHRAEEASKDKE
CACGGCGTCTGGAATGCAGGATGAGGTCAGAGCGGTTGGCGAGGAGCAAAGGTCAGAGGAGCCAAAGCGCAGGGTGGATACTTCAGTGTCTTGGGAGGCGTTGATTTGTGTCGGATCGTCCAAGAAGAGAGCGAGGAAGG	CACGGCGTCTGGAACGCAGGATGAGGTCAGAGCGGTTGGCGAGGAGCAAAGGTCAGAGGAGCCAAAGCGCAGGGTGGATACTTCAGTGTCTTGGGAGGCGTTGATTTGTGTCGGATCGTCCAAGAAGAGAGCGAGGAAGG	35	WT	VKSATLSSTESTASGMQDEVRAVGEEQRSEEPKRRVDTSVSWEALICVGSSKKRARKASSSDDEGGPRTLGGDGHRAEEASKDKE	VKSATLSSTESTASGMQDEVRAVGEEQRSEEPKRRVDTSVSWEALICVGSSKKRARKASSSDDEGGPRTLGGDGHRAEEASKDKE
CACGGCGTCTGGAATGCAGGATGAGGTCAGAGCGGTTGGCGAGGAGCAAAGGTCAGAGGAGCCAAAGCGCAGGGTGGATACTTCAGTGTCTTGGGAGGCGTTGATTTGTGTCGGATCGTCCAAGAAGAGAGCGAGGAAGG	CACGGCGTCTGGAATGCAGGATGAGGTCAGAGCGGTTGGCGAGGAGCAAAGGTCGGAGGAGCCAAAGCGCAGGGTGGATACTTCAGTGTCTTGGGAGGCGTTGATTTGTGTCGGATCGTCCAAGAAGAGAGCGAGGAAGG	34	WT	VKSATLSSTESTASGMQDEVRAVGEEQRSEEPKRRVDTSVSWEALICVGSSKKRARKASSSDDEGGPRTLGGDGHRAEEASKDKE	VKSATLSSTESTASGMQDEVRAVGEEQRSEEPKRRVDTSVSWEALICVGSSKKRARKASSSDDEGGPRTLGGDGHRAEEASKDKE
CACGGCGTCTGGAATGCAGGATGAGGTCAGAGCGGTTGGCGAGGAGCAAAGGTCAGAGGAGCCAAAGCGCAGGGTGGATACTTCAGTGTCTTGGGAGGCGTTGATTTGTGTCGGATCGTCCAAGAAGAGAGCGAGGAAGG	CACGGCGTCTGGAATGCAGGATGAGGTCAGAGCGGTTGGCGAGGAGCAAAGGTCAGAGGAGCCAAGGCGCAGGGTGGATACTTCAGTGTCTTGGGAGGCGTTGATTTGTGTCGGATCGTCCAAGAAGAGAGCGAGGAAGG	33	WT	VKSATLSSTESTASGMQDEVRAVGEEQRSEEPKRRVDTSVSWEALICVGSSKKRARKASSSDDEGGPRTLGGDGHRAEEASKDKE	VKSATLSSTESTASGMQDEVRAVGEEQRSEEPKRRVDTSVSWEALICVGSSKKRARKASSSDDEGGPRTLGGDGHRAEEASKDKE
CACGGCGTCTGGAATGCAGGATGAGGTCAGAGCGGTTGGCGAGGAGCAAAGGTCAGAGGAGCCAAAGCGCAGGGTGGATACTTCAGTGTCTTGGGAGGCGTTGATTTGTGTCGGATCGTCCAAGAAGAGAGCGAGGAAGG	CACGGCGTCTGGAATGCAGGATGAGGTCAGAGCGGCTGGCGAGGAGCAAAGGTCAGAGGAGCCAAAGCGCAGGGTGGATACTTCAGTGTCTTGGGAGGCGTTGATTTGTGTCGGATCGTCCAAGAAGAGAGCGAGGAAGG	32	WT	VKSATLSSTESTASGMQDEVRAVGEEQRSEEPKRRVDTSVSWEALICVGSSKKRARKASSSDDEGGPRTLGGDGHRAEEASKDKE	VKSATLSSTESTASGMQDEVRAVGEEQRSEEPKRRVDTSVSWEALICVGSSKKRARKASSSDDEGGPRTLGGDGHRAEEASKDKE
CACGGCGTCTGGAATGCAGGATGAGGTCAGAGCGGTTGGCGAGGAGCAAAGGTCAGAGGAGCCAAAGCGCAGGGTGGATACTTCAGTGTCTTGGGAGGCGTTGATTTGTGTCGGATCGTCCAAGAAGAGAGCGAGGAAGG	CACGGCGTCCGGAATGCAGGATGAGGTCAGAGCGGTTGGCGAGGAGCAAAGGTCAGAGGAGCCAAAGCGCAGGGTGGATACTTCAGTGTCTTGGGAGGCGTTGATTTGTGTCGGATCGTCCAAGAAGAGAGCGAGGAAGG	31	WT	VKSATLSSTESTASGMQDEVRAVGEEQRSEEPKRRVDTSVSWEALICVGSSKKRARKASSSDDEGGPRTLGGDGHRAEEASKDKE	VKSATLSSTESTASGMQDEVRAVGEEQRSEEPKRRVDTSVSWEALICVGSSKKRARKASSSDDEGGPRTLGGDGHRAEEASKDKE
CACGGCGTCTGGAATGCAGGATGAGGTCAGAGCGGTTGGCGAGGAGCAAAGGTCAGAGGAGCCAAAGCGCAGGGTGGATACTTCAGTGTCTTGGGAGGCGTTGATTTGTGTCGGATCGTCCAAGAAGAGAGCGAGGAAGG	CACGGCGTCTGGAATGCAGGATGAGGTCAGAGCGGTTGGCGAGGAGCAAAGGTCAGAGGAGCCAGAGCGCAGGGTGGATACTTCAGTGTCTTGGGAGGCGTTGATTTGTGTCGGATCGTCCAAGAAGAGAGCGAGGAAGG	31	WT	VKSATLSSTESTASGMQDEVRAVGEEQRSEEPKRRVDTSVSWEALICVGSSKKRARKASSSDDEGGPRTLGGDGHRAEEASKDKE	VKSATLSSTESTASGMQDEVRAVGEEQRSEEPKRRVDTSVSWEALICVGSSKKRARKASSSDDEGGPRTLGGDGHRAEEASKDKE
CACGGCGTCTGGAATGCAGGATGAGGTCAGAGCGGTTGGCGAGGAGCAAAGGTCAGAGGAGCCAAAGCGCAGGGTGGATACTTCAGTGTCTTGGGAGGCGTTGATTTGTGTCGGATCGTCCAAGAAGAGAGCGAGGAAGG	CACGGCGTCTGGAATGCAGGATGAGGTCAGAGCGGTTGGCGAGGAGCAAAGGTCAGAGGAGCCAAAGCGCAGGGTGGATACTTCAGTGTCCTGGGAGGCGTTGATTTGTGTCGGATCGTCCAAGAAGAGAGCGAGGAAGG	31	WT	VKSATLSSTESTASGMQDEVRAVGEEQRSEEPKRRVDTSVSWEALICVGSSKKRARKASSSDDEGGPRTLGGDGHRAEEASKDKE	VKSATLSSTESTASGMQDEVRAVGEEQRSEEPKRRVDTSVSWEALICVGSSKKRARKASSSDDEGGPRTLGGDGHRAEEASKDKE
CACGGCGTCTGGAATGCAGGATGAGGTCAGAGCGGTTGGCGAGGAGCAAAGGTCAGAGGAGCCAAAGCGCAGGGTGGATACTTCAGTGTCTTGGGAGGCGTTGATTTGTGTCGGATCGTCCAAGAAGAGAGCGAGGAAGG	CACGGCGTCTGGAATGCAGGATGAGGTCAGAGCGGTTGGCGAGGAGCAAAGGTCAGAGGAGCCAAAGCGCAGGGTGGATACTTCAGTGTCTTGGGAGGCGTTGGTTTGTGTCGGATCGTCCAAGAAGAGAGCGAGGAAGG	29	WT	VKSATLSSTESTASGMQDEVRAVGEEQRSEEPKRRVDTSVSWEALICVGSSKKRARKASSSDDEGGPRTLGGDGHRAEEASKDKE	VKSATLSSTESTASGMQDEVRAVGEEQRSEEPKRRVDTSVSWEALICVGSSKKRARKASSSDDEGGPRTLGGDGHRAEEASKDKE
CACGGCGTCTGGAATGCAGGATGAGGTCAGAGCGGTTGGCGAGGAGCAAAGGTCAGAGGAGCCAAAGCGCAGGGTGGATACTTCAGTGTCTTGGGAGGCGTTGATTTGTGTCGGATCGTCCAAGAAGAGAGCGAGGAAGG	CACGGCGTCTGGAATGCAGGATGAGGTCAGAGCGGTTGGCGAGGAGCAAAGGTCAGAGGAGCCAAAGCGCAGGGTGGATACTTCAGTGTCTTGGGAGGCGTTGATTTGCGTCGGATCGTCCAAGAAGAGAGCGAGGAAGG	29	WT	VKSATLSSTESTASGMQDEVRAVGEEQRSEEPKRRVDTSVSWEALICVGSSKKRARKASSSDDEGGPRTLGGDGHRAEEASKDKE	VKSATLSSTESTASGMQDEVRAVGEEQRSEEPKRRVDTSVSWEALICVGSSKKRARKASSSDDEGGPRTLGGDGHRAEEASKDKE
CACGGCGTCTGGAATGCAGGATGAGGTCAGAGCGGTTGGCGAGGAGCAAAGGTCAGAGGAGCCAAAGCGCAGGGTGGATACTTCAGTGTCTTGGGAGGCGTTGATTTGTGTCGGATCGTCCAAGAAGAGAGCGAGGAAGG	CACGGCGTCTGGAATGCAGGATGAGGTCAGAGCGGTTGGCGAGGAGCAAAGGTCAGAGGAGCCAAAGCGCAGGGTGGATACTTCAGCGTCTTGGGAGGCGTTGATTTGTGTCGGATCGTCCAAGAAGAGAGCGAGGAAGG	29	WT	VKSATLSSTESTASGMQDEVRAVGEEQRSEEPKRRVDTSVSWEALICVGSSKKRARKASSSDDEGGPRTLGGDGHRAEEASKDKE	VKSATLSSTESTASGMQDEVRAVGEEQRSEEPKRRVDTSVSWEALICVGSSKKRARKASSSDDEGGPRTLGGDGHRAEEASKDKE
CACGGCGTCTGGAATGCAGGATGAGGTCAGAGCGGTTGGCGAGGAGCAAAGGTCAGAGGAGCCAAAGCGCAGGGTGGATACTTCAGTGTCTTGGGAGGCGTTGATTTGTGTCGGATCGTCCAAGAAGAGAGCGAGGAAGG	CACGGCGTCTGGAATGCAGGATGAGGTCAGAGCGGTTGGCGAGGAGCAAAGGTCAGGGGAGCCAAAGCGCAGGGTGGATACTTCAGTGTCTTGGGAGGCGTTGATTTGTGTCGGATCGTCCAAGAAGAGAGCGAGGAAGG	28	WT	VKSATLSSTESTASGMQDEVRAVGEEQRSEEPKRRVDTSVSWEALICVGSSKKRARKASSSDDEGGPRTLGGDGHRAEEASKDKE	VKSATLSSTESTASGMQDEVRAVGEEQRSEEPKRRVDTSVSWEALICVGSSKKRARKASSSDDEGGPRTLGGDGHRAEEASKDKE
CACGGCGTCTGGAATGCAGGATGAGGTCAGAGCGGTTGGCGAGGAGCAAAGGTCAGAGGAGCCAAAGCGCAGGGTGGATACTTCAGTGTCTTGGGAGGCGTTGATTTGTGTCGGATCGTCCAAGAAGAGAGCGAGGAAGG	CACGGCGTCTGGAATGCAGGATGAGGTCAGAGCGGTTGGCAAGGAGCAAAGGTCAGAGGAGCCAAAGCGCAGGGTGGATACTTCAGTGTCTTGGGAGGCGTTGATTTGTGTCGGATCGTCCAAGAAGAGAGCGAGGAAGG	28	WT	VKSATLSSTESTASGMQDEVRAVGEEQRSEEPKRRVDTSVSWEALICVGSSKKRARKASSSDDEGGPRTLGGDGHRAEEASKDKE	VKSATLSSTESTASGMQDEVRAVGEEQRSEEPKRRVDTSVSWEALICVGSSKKRARKASSSDDEGGPRTLGGDGHRAEEASKDKE
CACGGCGTCTGGAATGCAGGATGAGGTCAGAGCGGTTGGCGAGGAGCAAAGGTCAGAGGAGCCAAAGCGCAGGGTGGATACTTCAGTGTCTTGGGAGGCGTTGATTTGTGTCGGATCGTCCAAGAAGAGAGCGAGGAAGG	CACGGCGTCTGGAATGCAGGATGAGGTCAGAGCGGTTGGCGAGGAGCAAAGGTCAGAGGAGCCAAAGCGCAGGGTGGATACTTCAGTGTCTTGGGAGGCGTTGATTTGTGTCGGATCGTCCAAGAAGAGAGCAAGGAAGG	26	WT	VKSATLSSTESTASGMQDEVRAVGEEQRSEEPKRRVDTSVSWEALICVGSSKKRARKASSSDDEGGPRTLGGDGHRAEEASKDKE	VKSATLSSTESTASGMQDEVRAVGEEQRSEEPKRRVDTSVSWEALICVGSSKKRARKASSSDDEGGPRTLGGDGHRAEEASKDKE
CACGGCGTCTGGAATGCAGGATGAGGTCAGAGCGGTTGGCGAGGAGCAAAGGTCAGAGGAGCCAAAGCGCAGGGTGGATACTTCAGTGTCTTGGGAGGCGTTGATTTGTGTCGGATCGTCCAAGAAGAGAGCGAGGAAGG	CACGGCGTCTGGAATGCAGGATGAGGTCAGAGCGGTTGGCGAGGAGCAAAGGTCAGAGGAGCCAAAGCGCAGGGTGGATACTTCAGTGTCTTGGGAGGCGTTGATTTGTGCCGGATCGTCCAAGAAGAGAGCGAGGAAGG	26	WT	VKSATLSSTESTASGMQDEVRAVGEEQRSEEPKRRVDTSVSWEALICVGSSKKRARKASSSDDEGGPRTLGGDGHRAEEASKDKE	VKSATLSSTESTASGMQDEVRAVGEEQRSEEPKRRVDTSVSWEALICVGSSKKRARKASSSDDEGGPRTLGGDGHRAEEASKDKE
CACGGCGTCTGGAATGCAGGATGAGGTCAGAGCGGTTGGCGAGGAGCAAAGGTCAGAGGAGCCAAAGCGCAGGGTGGATACTTCAGTGTCTTGGGAGGCGTTGATTTGTGTCGGATCGTCCAAGAAGAGAGCGAGGAAGG	CACGGCGTCTGGAATGCAGGACGAGGTCAGAGCGGTTGGCGAGGAGCAAAGGTCAGAGGAGCCAAAGCGCAGGGTGGATACTTCAGTGTCTTGGGAGGCGTTGATTTGTGTCGGATCGTCCAAGAAGAGAGCGAGGAAGG	24	WT	VKSATLSSTESTASGMQDEVRAVGEEQRSEEPKRRVDTSVSWEALICVGSSKKRARKASSSDDEGGPRTLGGDGHRAEEASKDKE	VKSATLSSTESTASGMQDEVRAVGEEQRSEEPKRRVDTSVSWEALICVGSSKKRARKASSSDDEGGPRTLGGDGHRAEEASKDKE
CACGGCGTCTGGAATGCAGGATGAGGTCAGAGCGGTTGGCGAGGAGCAAAGGTCAGAGGAGCCAAAGCGCAGGGTGGATACTTCAGTGTCTTGGGAGGCGTTGATTTGTGTCGGATCGTCCAAGAAGAGAGCGAGGAAGG	CACGGCGTCTGGAATGCAGGATGAGGTCAGAGCGGTTGGCGAGGAGCGAAGGTCAGAGGAGCCAAAGCGCAGGGTGGATACTTCAGTGTCTTGGGAGGCGTTGATTTGTGTCGGATCGTCCAAGAAGAGAGCGAGGAAGG	24	WT	VKSATLSSTESTASGMQDEVRAVGEEQRSEEPKRRVDTSVSWEALICVGSSKKRARKASSSDDEGGPRTLGGDGHRAEEASKDKE	VKSATLSSTESTASGMQDEVRAVGEEQRSEEPKRRVDTSVSWEALICVGSSKKRARKASSSDDEGGPRTLGGDGHRAEEASKDKE
CACGGCGTCTGGAATGCAGGATGAGGTCAGAGCGGTTGGCGAGGAGCAAAGGTCAGAGGAGCCAAAGCGCAGGGTGGATACTTCAGTGTCTTGGGAGGCGTTGATTTGTGTCGGATCGTCCAAGAAGAGAGCGAGGAAGG	CACGGCGTCTGGAATGCAGGATGGGGTCAGAGCGGTTGGCGAGGAGCAAAGGTCAGAGGAGCCAAAGCGCAGGGTGGATACTTCAGTGTCTTGGGAGGCGTTGATTTGTGTCGGATCGTCCAAGAAGAGAGCGAGGAAGG	24	WT	VKSATLSSTESTASGMQDEVRAVGEEQRSEEPKRRVDTSVSWEALICVGSSKKRARKASSSDDEGGPRTLGGDGHRAEEASKDKE	VKSATLSSTESTASGMQDEVRAVGEEQRSEEPKRRVDTSVSWEALICVGSSKKRARKASSSDDEGGPRTLGGDGHRAEEASKDKE
CACGGCGTCTGGAATGCAGGATGAGGTCAGAGCGGTTGGCGAGGAGCAAAGGTCAGAGGAGCCAAAGCGCAGGGTGGATACTTCAGTGTCTTGGGAGGCGTTGATTTGTGTCGGATCGTCCAAGAAGAGAGCGAGGAAGG	CACGGCGTCTGGAATGCAGGATGAGGTCAGAGCGGTTGGCGAGGAGCAAAGGTCAGAGGAGCCAAAGCGCAGGGTGGATGCTTCAGTGTCTTGGGAGGCGTTGATTTGTGTCGGATCGTCCAAGAAGAGAGCGAGGAAGG	24	WT	VKSATLSSTESTASGMQDEVRAVGEEQRSEEPKRRVDTSVSWEALICVGSSKKRARKASSSDDEGGPRTLGGDGHRAEEASKDKE	VKSATLSSTESTASGMQDEVRAVGEEQRSEEPKRRVDTSVSWEALICVGSSKKRARKASSSDDEGGPRTLGGDGHRAEEASKDKE
CACGGCGTCTGGAATGCAGGATGAGGTCAGAGCGGTTGGCGAGGAGCAAAGGTCAGAGGAGCCAAAGCGCAGGGTGGATACTTCAGTGTCTTGGGAGGCGTTGATTTGTGTCGGATCGTCCAAGAAGAGAGCGAGGAAGG	CACGGCGTCTGGAATGCAGGATGAGGTCAGAGCGGTTGGCGAGGAGCAAAGGTCAGAGGAGCCAAAGCGCAGGGTGGATACTTCAGTGTCTTGGGAGGCGTTGATTTGTGTCAGATCGTCCAAGAAGAGAGCGAGGAAGG	22	WT	VKSATLSSTESTASGMQDEVRAVGEEQRSEEPKRRVDTSVSWEALICVGSSKKRARKASSSDDEGGPRTLGGDGHRAEEASKDKE	VKSATLSSTESTASGMQDEVRAVGEEQRSEEPKRRVDTSVSWEALICVGSSKKRARKASSSDDEGGPRTLGGDGHRAEEASKDKE
CACGGCGTCTGGAATGCAGGATGAGGTCAGAGCGGTTGGCGAGGAGCAAAGGTCAGAGGAGCCAAAGCGCAGGGTGGATACTTCAGTGTCTTGGGAGGCGTTGATTTGTGTCGGATCGTCCAAGAAGAGAGCGAGGAAGG	CACGGCATCTGGAATGCAGGATGAGGTCAGAGCGGTTGGCGAGGAGCAAAGGTCAGAGGAGCCAAAGCGCAGGGTGGATACTTCAGTGTCTTGGGAGGCGTTGATTTGTGTCGGATCGTCCAAGAAGAGAGCGAGGAAGG	21	WT	VKSATLSSTESTASGMQDEVRAVGEEQRSEEPKRRVDTSVSWEALICVGSSKKRARKASSSDDEGGPRTLGGDGHRAEEASKDKE	VKSATLSSTESTASGMQDEVRAVGEEQRSEEPKRRVDTSVSWEALICVGSSKKRARKASSSDDEGGPRTLGGDGHRAEEASKDKE
CACGGCGTCTGGAATGCAGGATGAGGTCAGAGCGGTTGGCGAGGAGCAAAGGTCAGAGGAGCCAAAGCGCAGGGTGGATACTTCAGTGTCTTGGGAGGCGTTGATTTGTGTCGGATCGTCCAAGAAGAGAGCGAGGAAGG	CACGGCGTCTGGAATGCAGGATGAGGTCAGAGCGGTTGGCGAGGAGCAAAGGTCAGAGGAGCCAAAGCGCAGGGTGGACACTTCAGTGTCTTGGGAGGCGTTGATTTGTGTCGGATCGTCCAAGAAGAGAGCGAGGAAGG	21	WT	VKSATLSSTESTASGMQDEVRAVGEEQRSEEPKRRVDTSVSWEALICVGSSKKRARKASSSDDEGGPRTLGGDGHRAEEASKDKE	VKSATLSSTESTASGMQDEVRAVGEEQRSEEPKRRVDTSVSWEALICVGSSKKRARKASSSDDEGGPRTLGGDGHRAEEASKDKE
CACGGCGTCTGGAATGCAGGATGAGGTCAGAGCGGTTGGCGAGGAGCAAAGGTCAGAGGAGCCAAAGCGCAGGGTGGATACTTCAGTGTCTTGGGAGGCGTTGATTTGTGTCGGATCGTCCAAGAAGAGAGCGAGGAAGG	CACGGCGTCTTGAATGCAGGATGAGGTCAGAGCGGTTGGCGAGGAGCAAAGGTCAGAGGAGCCAAAGCGCAGGGTGGATACTTCAGTGTCTTGGGAGGCGTTGATTTGTGTCGGATCGTCCAAGAAGAGAGCGAGGAAGG	20	WT	VKSATLSSTESTASGMQDEVRAVGEEQRSEEPKRRVDTSVSWEALICVGSSKKRARKASSSDDEGGPRTLGGDGHRAEEASKDKE	VKSATLSSTESTASGMQDEVRAVGEEQRSEEPKRRVDTSVSWEALICVGSSKKRARKASSSDDEGGPRTLGGDGHRAEEASKDKE
CACGGCGTCTGGAATGCAGGATGAGGTCAGAGCGGTTGGCGAGGAGCAAAGGTCAGAGGAGCCAAAGCGCAGGGTGGATACTTCAGTGTCTTGGGAGGCGTTGATTTGTGTCGGATCGTCCAAGAAGAGAGCGAGGAAGG	CACGGCGTCTGGAATGCATGATGAGGTCAGAGCGGTTGGCGAGGAGCAAAGGTCAGAGGAGCCAAAGCGCAGGGTGGATACTTCAGTGTCTTGGGAGGCGTTGATTTGTGTCGGATCGTCCAAGAAGAGAGCGAGGAAGG	19	WT	VKSATLSSTESTASGMQDEVRAVGEEQRSEEPKRRVDTSVSWEALICVGSSKKRARKASSSDDEGGPRTLGGDGHRAEEASKDKE	VKSATLSSTESTASGMQDEVRAVGEEQRSEEPKRRVDTSVSWEALICVGSSKKRARKASSSDDEGGPRTLGGDGHRAEEASKDKE
CACGGCGTCTGGAATGCAGGATGAGGTCAGAGCGGTTGGCGAGGAGCAAAGGTCAGAGGAGCCAAAGCGCAGGGTGGATACTTCAGTGTCTTGGGAGGCGTTGATTTGTGTCGGATCGTCCAAGAAGAGAGCGAGGAAGG	CACGGCGTCTGGAATGCAGGATGAGGTCAGAGCGGTTGGCGAGGAGCAAAGGTCAGAGGAGCCAAAGCGCAGGGCGGATACTTCAGTGTCTTGGGAGGCGTTGATTTGTGTCGGATCGTCCAAGAAGAGAGCGAGGAAGG	19	WT	VKSATLSSTESTASGMQDEVRAVGEEQRSEEPKRRVDTSVSWEALICVGSSKKRARKASSSDDEGGPRTLGGDGHRAEEASKDKE	VKSATLSSTESTASGMQDEVRAVGEEQRSEEPKRRVDTSVSWEALICVGSSKKRARKASSSDDEGGPRTLGGDGHRAEEASKDKE
CACGGCGTCTGGAATGCAGGATGAGGTCAGAGCGGTTGGCGAGGAGCAAAGGTCAGAGGAGCCAAAGCGCAGGGTGGATACTTCAGTGTCTTGGGAGGCGTTGATTTGTGTCGGATCGTCCAAGAAGAGAGCGAGGAAGG	CACGGCGTCTGGAATGCAGGATGAGGTCAGAGCGGTTGGCGAGGAGCAAAGGTCAGAGGAGCCAAAGCGCAGAGTGGATACTTCAGTGTCTTGGGAGGCGTTGATTTGTGTCGGATCGTCCAAGAAGAGAGCGAGGAAGG	19	WT	VKSATLSSTESTASGMQDEVRAVGEEQRSEEPKRRVDTSVSWEALICVGSSKKRARKASSSDDEGGPRTLGGDGHRAEEASKDKE	VKSATLSSTESTASGMQDEVRAVGEEQRSEEPKRRVDTSVSWEALICVGSSKKRARKASSSDDEGGPRTLGGDGHRAEEASKDKE
CACGGCGTCTGGAATGCAGGATGAGGTCAGAGCGGTTGGCGAGGAGCAAAGGTCAGAGGAGCCAAAGCGCAGGGTGGATACTTCAGTGTCTTGGGAGGCGTTGATTTGTGTCGGATCGTCCAAGAAGAGAGCGAGGAAGG	CACGGCGTCTGGAATGCAGGATGAGGTCAGAGCGGTTGGCGAGGAGCAAAGGTCAGAGGAGTCAAAGCGCAGGGTGGATACTTCAGTGTCTTGGGAGGCGTTGATTTGTGTCGGATCGTCCAAGAAGAGAGCGAGGAAGG	19	WT	VKSATLSSTESTASGMQDEVRAVGEEQRSEEPKRRVDTSVSWEALICVGSSKKRARKASSSDDEGGPRTLGGDGHRAEEASKDKE	VKSATLSSTESTASGMQDEVRAVGEEQRSEEPKRRVDTSVSWEALICVGSSKKRARKASSSDDEGGPRTLGGDGHRAEEASKDKE
CACGGCGTCTGGAATGCAGGATGAGGTCAGAGCGGTTGGCGAGGAGCAAAGGTCAGAGGAGCCAAAGCGCAGGGTGGATACTTCAGTGTCTTGGGAGGCGTTGATTTGTGTCGGATCGTCCAAGAAGAGAGCGAGGAAGG	CACGGCGTCTGGAATGCAGGATGAGGTCAGAGCGGTTGGCGAGGAGTAAAGGTCAGAGGAGCCAAAGCGCAGGGTGGATACTTCAGTGTCTTGGGAGGCGTTGATTTGTGTCGGATCGTCCAAGAAGAGAGCGAGGAAGG	18	WT	VKSATLSSTESTASGMQDEVRAVGEEQRSEEPKRRVDTSVSWEALICVGSSKKRARKASSSDDEGGPRTLGGDGHRAEEASKDKE	VKSATLSSTESTASGMQDEVRAVGEEQRSEEPKRRVDTSVSWEALICVGSSKKRARKASSSDDEGGPRTLGGDGHRAEEASKDKE
CACGGCGTCTGGAATGCAGGATGAGGTCAGAGCGGTTGGCGAGGAGCAAAGGTCAGAGGAGCCAAAGCGCAGGGTGGATACTTCAGTGTCTTGGGAGGCGTTGATTTGTGTCGGATCGTCCAAGAAGAGAGCGAGGAAGG	CACGGCGTCTGGAATGCAGGATGAAGTCAGAGCGGTTGGCGAGGAGCAAAGGTCAGAGGAGCCAAAGCGCAGGGTGGATACTTCAGTGTCTTGGGAGGCGTTGATTTGTGTCGGATCGTCCAAGAAGAGAGCGAGGAAGG	18	WT	VKSATLSSTESTASGMQDEVRAVGEEQRSEEPKRRVDTSVSWEALICVGSSKKRARKASSSDDEGGPRTLGGDGHRAEEASKDKE	VKSATLSSTESTASGMQDEVRAVGEEQRSEEPKRRVDTSVSWEALICVGSSKKRARKASSSDDEGGPRTLGGDGHRAEEASKDKE
CACGGCGTCTGGAATGCAGGATGAGGTCAGAGCGGTTGGCGAGGAGCAAAGGTCAGAGGAGCCAAAGCGCAGGGTGGATACTTCAGTGTCTTGGGAGGCGTTGATTTGTGTCGGATCGTCCAAGAAGAGAGCGAGGAAGG	CACGGTGTCTGGAATGCAGGATGAGGTCAGAGCGGTTGGCGAGGAGCAAAGGTCAGAGGAGCCAAAGCGCAGGGTGGATACTTCAGTGTCTTGGGAGGCGTTGATTTGTGTCGGATCGTCCAAGAAGAGAGCGAGGAAGG	18	WT	VKSATLSSTESTASGMQDEVRAVGEEQRSEEPKRRVDTSVSWEALICVGSSKKRARKASSSDDEGGPRTLGGDGHRAEEASKDKE	VKSATLSSTESTASGMQDEVRAVGEEQRSEEPKRRVDTSVSWEALICVGSSKKRARKASSSDDEGGPRTLGGDGHRAEEASKDKE
CACGGCGTCTGGAATGCAGGATGAGGTCAGAGCGGTTGGCGAGGAGCAAAGGTCAGAGGAGCCAAAGCGCAGGGTGGATACTTCAGTGTCTTGGGAGGCGTTGATTTGTGTCGGATCGTCCAAGAAGAGAGCGAGGAAGG	CACGGCGTCTAGAATGCAGGATGAGGTCAGAGCGGTTGGCGAGGAGCAAAGGTCAGAGGAGCCAAAGCGCAGGGTGGATACTTCAGTGTCTTGGGAGGCGTTGATTTGTGTCGGATCGTCCAAGAAGAGAGCGAGGAAGG	17	WT	VKSATLSSTESTASGMQDEVRAVGEEQRSEEPKRRVDTSVSWEALICVGSSKKRARKASSSDDEGGPRTLGGDGHRAEEASKDKE	VKSATLSSTESTASGMQDEVRAVGEEQRSEEPKRRVDTSVSWEALICVGSSKKRARKASSSDDEGGPRTLGGDGHRAEEASKDKE
CACGGCGTCTGGAATGCAGGATGAGGTCAGAGCGGTTGGCGAGGAGCAAAGGTCAGAGGAGCCAAAGCGCAGGGTGGATACTTCAGTGTCTTGGGAGGCGTTGATTTGTGTCGGATCGTCCAAGAAGAGAGCGAGGAAGG	CACGGCGTCTGGAATGCAGAATGAGGTCAGAGCGGTTGGCGAGGAGCAAAGGTCAGAGGAGCCAAAGCGCAGGGTGGATACTTCAGTGTCTTGGGAGGCGTTGATTTGTGTCGGATCGTCCAAGAAGAGAGCGAGGAAGG	17	WT	VKSATLSSTESTASGMQDEVRAVGEEQRSEEPKRRVDTSVSWEALICVGSSKKRARKASSSDDEGGPRTLGGDGHRAEEASKDKE	VKSATLSSTESTASGMQDEVRAVGEEQRSEEPKRRVDTSVSWEALICVGSSKKRARKASSSDDEGGPRTLGGDGHRAEEASKDKE
CACGGCGTCTGGAATGCAGGATGAGGTCAGAGCGGTTGGCGAGGAGCAAAGGTCAGAGGAGCCAAAGCGCAGGGTGGATACTTCAGTGTCTTGGGAGGCGTTGATTTGTGTCGGATCGTCCAAGAAGAGAGCGAGGAAGG	CACGGCGTCTGGAATGCAGGATGAGGTCAGAGCGGTTGGCGAGGAGCAAAGGTCAGAGGAGCCAAAGCGCAGGGTGGATACTTCAGTGTCTTGGGAGGCGTTGATTTGTGTCGGATCATCCAAGAAGAGAGCGAGGAAGG	17	WT	VKSATLSSTESTASGMQDEVRAVGEEQRSEEPKRRVDTSVSWEALICVGSSKKRARKASSSDDEGGPRTLGGDGHRAEEASKDKE	VKSATLSSTESTASGMQDEVRAVGEEQRSEEPKRRVDTSVSWEALICVGSSKKRARKASSSDDEGGPRTLGGDGHRAEEASKDKE
CACGGCGTCTGGAATGCAGGATGAGGTCAGAGCGGTTGGCGAGGAGCAAAGGTCAGAGGAGCCAAAGCGCAGGGTGGATACTTCAGTGTCTTGGGAGGCGTTGATTTGTGTCGGATCGTCCAAGAAGAGAGCGAGGAAGG	CACGGCGTCTGGAATGCAGGATAAGGTCAGAGCGGTTGGCGAGGAGCAAAGGTCAGAGGAGCCAAAGCGCAGGGTGGATACTTCAGTGTCTTGGGAGGCGTTGATTTGTGTCGGATCGTCCAAGAAGAGAGCGAGGAAGG	17	WT	VKSATLSSTESTASGMQDEVRAVGEEQRSEEPKRRVDTSVSWEALICVGSSKKRARKASSSDDEGGPRTLGGDGHRAEEASKDKE	VKSATLSSTESTASGMQDEVRAVGEEQRSEEPKRRVDTSVSWEALICVGSSKKRARKASSSDDEGGPRTLGGDGHRAEEASKDKE
CACGGCGTCTGGAATGCAGGATGAGGTCAGAGCGGTTGGCGAGGAGCAAAGGTCAGAGGAGCCAAAGCGCAGGGTGGATACTTCAGTGTCTTGGGAGGCGTTGATTTGTGTCGGATCGTCCAAGAAGAGAGCGAGGAAGG	CACGGCGTCTGGAATGCAGGATGAGGTCAGAGCGGTTGGCGAGGAGCAAAGGTTAGAGGAGCCAAAGCGCAGGGTGGATACTTCAGTGTCTTGGGAGGCGTTGATTTGTGTCGGATCGTCCAAGAAGAGAGCGAGGAAGG	17	WT	VKSATLSSTESTASGMQDEVRAVGEEQRSEEPKRRVDTSVSWEALICVGSSKKRARKASSSDDEGGPRTLGGDGHRAEEASKDKE	VKSATLSSTESTASGMQDEVRAVGEEQRSEEPKRRVDTSVSWEALICVGSSKKRARKASSSDDEGGPRTLGGDGHRAEEASKDKE
CACGGCGTCTGGAATGCAGGATGAGGTCAGAGCGGTTGGCGAGGAGCAAAGGTCAGAGGAGCCAAAGCGCAGGGTGGATACTTCAGTGTCTTGGGAGGCGTTGATTTGTGTCGGATCGTCCAAGAAGAGAGCGAGGAAGG	CACGGCGTCTGGAATGCAGGATGAGGTCAGAGCGGTTGGCGAGGAGCAAAGGTCAGAGGAGCCAAAGCGCAGGGTGGATACTTCAGTGTCTTGGGAGGCGTCGATTTGTGTCGGATCGTCCAAGAAGAGAGCGAGGAAGG	16	WT	VKSATLSSTESTASGMQDEVRAVGEEQRSEEPKRRVDTSVSWEALICVGSSKKRARKASSSDDEGGPRTLGGDGHRAEEASKDKE	VKSATLSSTESTASGMQDEVRAVGEEQRSEEPKRRVDTSVSWEALICVGSSKKRARKASSSDDEGGPRTLGGDGHRAEEASKDKE
CACGGCGTCTGGAATGCAGGATGAGGTCAGAGCGGTTGGCGAGGAGCAAAGGTCAGAGGAGCCAAAGCGCAGGGTGGATACTTCAGTGTCTTGGGAGGCGTTGATTTGTGTCGGATCGTCCAAGAAGAGAGCGAGGAAGG	CACGGCGTCTGGAATGCAGGATGAGGTCAGAGCGGTTGGCGAGGAGCAAAGGTCAGAGGAGCCAAAGCGCAGGGTGGATACTTCAGTGTCTTGGGAGGCGTTGATTTGTGTCGGATCGTCCAAGAAGAGAGCGAGGAAGT	16	WT	VKSATLSSTESTASGMQDEVRAVGEEQRSEEPKRRVDTSVSWEALICVGSSKKRARKASSSDDEGGPRTLGGDGHRAEEASKDKE	VKSATLSSTESTASGMQDEVRAVGEEQRSEEPKRRVDTSVSWEALICVGSSKKRARKASSSDDEGGPRTLGGDGHRAEEASKDKE
CACGGCGTCTGGAATGCAGGATGAGGTCAGAGCGGTTGGCGAGGAGCAAAGGTCAGAGGAGCCAAAGCGCAGGGTGGATACTTCAGTGTCTTGGGAGGCGTTGATTTGTGTCGGATCGTCCAAGAAGAGAGCGAGGAAGG	CACGGCGTCTGGAATGCAGGATGAGGTCAGAGCGGTTGGCGAGGAGCAAAGGTCAGAGGAGCCAAAGCGCAGGGTAGATACTTCAGTGTCTTGGGAGGCGTTGATTTGTGTCGGATCGTCCAAGAAGAGAGCGAGGAAGG	16	WT	VKSATLSSTESTASGMQDEVRAVGEEQRSEEPKRRVDTSVSWEALICVGSSKKRARKASSSDDEGGPRTLGGDGHRAEEASKDKE	VKSATLSSTESTASGMQDEVRAVGEEQRSEEPKRRVDTSVSWEALICVGSSKKRARKASSSDDEGGPRTLGGDGHRAEEASKDKE
CACGGCGTCTGGAATGCAGGATGAGGTCAGAGCGGTTGGCGAGGAGCAAAGGTCAGAGGAGCCAAAGCGCAGGGTGGATACTTCAGTGTCTTGGGAGGCGTTGATTTGTGTCGGATCGTCCAAGAAGAGAGCGAGGAAGG	CACGGCGTCTGGAATGCAGGATGAGGTCAGAGCGGTTGGCGAGGAGCAAAGGTCAGAGGAGCCAAAGCGCAGGGTGGATACTTCAGTGTCTTGGGAGGCGTTGATTTGTGTTGGATCGTCCAAGAAGAGAGCGAGGAAGG	16	WT	VKSATLSSTESTASGMQDEVRAVGEEQRSEEPKRRVDTSVSWEALICVGSSKKRARKASSSDDEGGPRTLGGDGHRAEEASKDKE	VKSATLSSTESTASGMQDEVRAVGEEQRSEEPKRRVDTSVSWEALICVGSSKKRARKASSSDDEGGPRTLGGDGHRAEEASKDKE
CACGGCGTCTGGAATGCAGGATGAGGTCAGAGCGGTTGGCGAGGAGCAAAGGTCAGAGGAGCCAAAGCGCAGGGTGGATACTTCAGTGTCTTGGGAGGCGTTGATTTGTGTCGGATCGTCCAAGAAGAGAGCGAGGAAGG	CACGGCGTCTGGAATGCAGGATGAGGTCAGAGCGGTTGGCGAGGAGCAAAGGTCAGAGGAGCCAAAGCGCAGGGTGGATACTTCAGTGTCTTGGGAGGCGTTGATTTGTGTCGGATCGTCTAAGAAGAGAGCGAGGAAGG	16	WT	VKSATLSSTESTASGMQDEVRAVGEEQRSEEPKRRVDTSVSWEALICVGSSKKRARKASSSDDEGGPRTLGGDGHRAEEASKDKE	VKSATLSSTESTASGMQDEVRAVGEEQRSEEPKRRVDTSVSWEALICVGSSKKRARKASSSDDEGGPRTLGGDGHRAEEASKDKE
CACGGCGTCTGGAATGCAGGATGAGGTCAGAGCGGTTGGCGAGGAGCAAAGGTCAGAGGAGCCAAAGCGCAGGGTGGATACTTCAGTGTCTTGGGAGGCGTTGATTTGTGTCGGATCGTCCAAGAAGAGAGCGAGGAAGG	CACGGCGTCTGGAATGCAGGATGAGGTCAGAGCGGTTGGCGAGGAGCAAAGGTCAGAGGAGCCAAAGCGCAGGGTGGATACTTCAGTATCTTGGGAGGCGTTGATTTGTGTCGGATCGTCCAAGAAGAGAGCGAGGAAGG	15	WT	VKSATLSSTESTASGMQDEVRAVGEEQRSEEPKRRVDTSVSWEALICVGSSKKRARKASSSDDEGGPRTLGGDGHRAEEASKDKE	VKSATLSSTESTASGMQDEVRAVGEEQRSEEPKRRVDTSVSWEALICVGSSKKRARKASSSDDEGGPRTLGGDGHRAEEASKDKE
CACGGCGTCTGGAATGCAGGATGAGGTCAGAGCGGTTGGCGAGGAGCAAAGGTCAGAGGAGCCAAAGCGCAGGGTGGATACTTCAGTGTCTTGGGAGGCGTTGATTTGTGTCGGATCGTCCAAGAAGAGAGCGAGGAAGG	CACGGCGTCTGGAATGCAGGATGAGGTCATAGCGGTTGGCGAGGAGCAAAGGTCAGAGGAGCCAAAGCGCAGGGTGGATACTTCAGTGTCTTGGGAGGCGTTGATTTGTGTCGGATCGTCCAAGAAGAGAGCGAGGAAGG	15	WT	VKSATLSSTESTASGMQDEVRAVGEEQRSEEPKRRVDTSVSWEALICVGSSKKRARKASSSDDEGGPRTLGGDGHRAEEASKDKE	VKSATLSSTESTASGMQDEVRAVGEEQRSEEPKRRVDTSVSWEALICVGSSKKRARKASSSDDEGGPRTLGGDGHRAEEASKDKE
CACGGCGTCTGGAATGCAGGATGAGGTCAGAGCGGTTGGCGAGGAGCAAAGGTCAGAGGAGCCAAAGCGCAGGGTGGATACTTCAGTGTCTTGGGAGGCGTTGATTTGTGTCGGATCGTCCAAGAAGAGAGCGAGGAAGG	CACAGCGTCTGGAATGCAGGATGAGGTCAGAGCGGTTGGCGAGGAGCAAAGGTCAGAGGAGCCAAAGCGCAGGGTGGATACTTCAGTGTCTTGGGAGGCGTTGATTTGTGTCGGATCGTCCAAGAAGAGAGCGAGGAAGG	15	WT	VKSATLSSTESTASGMQDEVRAVGEEQRSEEPKRRVDTSVSWEALICVGSSKKRARKASSSDDEGGPRTLGGDGHRAEEASKDKE	VKSATLSSTESTASGMQDEVRAVGEEQRSEEPKRRVDTSVSWEALICVGSSKKRARKASSSDDEGGPRTLGGDGHRAEEASKDKE
CACGGCGTCTGGAATGCAGGATGAGGTCAGAGCGGTTGGCGAGGAGCAAAGGTCAGAGGAGCCAAAGCGCAGGGTGGATACTTCAGTGTCTTGGGAGGCGTTGATTTGTGTCGGATCGTCCAAGAAGAGAGCGAGGAAGG	CACGGCGTCTGGAATGCAGGATGAGGTCAGAGCGGTTGGCGAGGAGCAAAGGTCAGAGGAGCTAAAGCGCAGGGTGGATACTTCAGTGTCTTGGGAGGCGTTGATTTGTGTCGGATCGTCCAAGAAGAGAGCGAGGAAGG	15	WT	VKSATLSSTESTASGMQDEVRAVGEEQRSEEPKRRVDTSVSWEALICVGSSKKRARKASSSDDEGGPRTLGGDGHRAEEASKDKE	VKSATLSSTESTASGMQDEVRAVGEEQRSEEPKRRVDTSVSWEALICVGSSKKRARKASSSDDEGGPRTLGGDGHRAEEASKDKE
CACGGCGTCTGGAATGCAGGATGAGGTCAGAGCGGTTGGCGAGGAGCAAAGGTCAGAGGAGCCAAAGCGCAGGGTGGATACTTCAGTGTCTTGGGAGGCGTTGATTTGTGTCGGATCGTCCAAGAAGAGAGCGAGGAAGG	CACGGCGTCTGGAATGCAGGATGAGGTCAGAGCGATTGGCGAGGAGCAAAGGTCAGAGGAGCCAAAGCGCAGGGTGGATACTTCAGTGTCTTGGGAGGCGTTGATTTGTGTCGGATCGTCCAAGAAGAGAGCGAGGAAGG	15	WT	VKSATLSSTESTASGMQDEVRAVGEEQRSEEPKRRVDTSVSWEALICVGSSKKRARKASSSDDEGGPRTLGGDGHRAEEASKDKE	VKSATLSSTESTASGMQDEVRAVGEEQRSEEPKRRVDTSVSWEALICVGSSKKRARKASSSDDEGGPRTLGGDGHRAEEASKDKE
CACGGCGTCTGGAATGCAGGATGAGGTCAGAGCGGTTGGCGAGGAGCAAAGGTCAGAGGAGCCAAAGCGCAGGGTGGATACTTCAGTGTCTTGGGAGGCGTTGATTTGTGTCGGATCGTCCAAGAAGAGAGCGAGGAAGG	CACGGCGTCTGGAATGCAGGATGAGGTCAGAGCGGTTGGCGAGGAGCAAAGGTCAGAGGAGCCAAAGCGCTGGGTGGATACTTCAGTGTCTTGGGAGGCGTTGATTTGTGTCGGATCGTCCAAGAAGAGAGCGAGGAAGG	15	WT	VKSATLSSTESTASGMQDEVRAVGEEQRSEEPKRRVDTSVSWEALICVGSSKKRARKASSSDDEGGPRTLGGDGHRAEEASKDKE	VKSATLSSTESTASGMQDEVRAVGEEQRSEEPKRRVDTSVSWEALICVGSSKKRARKASSSDDEGGPRTLGGDGHRAEEASKDKE
CACGGCGTCTGGAATGCAGGATGAGGTCAGAGCGGTTGGCGAGGAGCAAAGGTCAGAGGAGCCAAAGCGCAGGGTGGATACTTCAGTGTCTTGGGAGGCGTTGATTTGTGTCGGATCGTCCAAGAAGAGAGCGAGGAAGG	CACGGCGTCTGGAATGCAGGATGAGGTCAGAGCGGTTTGCGAGGAGCAAAGGTCAGAGGAGCCAAAGCGCAGGGTGGATACTTCAGTGTCTTGGGAGGCGTTGATTTGTGTCGGATCGTCCAAGAAGAGAGCGAGGAAGG	14	WT	VKSATLSSTESTASGMQDEVRAVGEEQRSEEPKRRVDTSVSWEALICVGSSKKRARKASSSDDEGGPRTLGGDGHRAEEASKDKE	VKSATLSSTESTASGMQDEVRAVGEEQRSEEPKRRVDTSVSWEALICVGSSKKRARKASSSDDEGGPRTLGGDGHRAEEASKDKE
CACGGCGTCTGGAATGCAGGATGAGGTCAGAGCGGTTGGCGAGGAGCAAAGGTCAGAGGAGCCAAAGCGCAGGGTGGATACTTCAGTGTCTTGGGAGGCGTTGATTTGTGTCGGATCGTCCAAGAAGAGAGCGAGGAAGG	CACGGCGTCTGGAATGCAGGATGAGGTCAGAGCGGTTGGTGAGGAGCAAAGGTCAGAGGAGCCAAAGCGCAGGGTGGATACTTCAGTGTCTTGGGAGGCGTTGATTTGTGTCGGATCGTCCAAGAAGAGAGCGAGGAAGG	14	WT	VKSATLSSTESTASGMQDEVRAVGEEQRSEEPKRRVDTSVSWEALICVGSSKKRARKASSSDDEGGPRTLGGDGHRAEEASKDKE	VKSATLSSTESTASGMQDEVRAVGEEQRSEEPKRRVDTSVSWEALICVGSSKKRARKASSSDDEGGPRTLGGDGHRAEEASKDKE
CACGGCGTCTGGAATGCAGGATGAGGTCAGAGCGGTTGGCGAGGAGCAAAGGTCAGAGGAGCCAAAGCGCAGGGTGGATACTTCAGTGTCTTGGGAGGCGTTGATTTGTGTCGGATCGTCCAAGAAGAGAGCGAGGAAGG	CATGGCGTCTGGAATGCAGGATGAGGTCAGAGCGGTTGGCGAGGAGCAAAGGTCAGAGGAGCCAAAGCGCAGGGTGGATACTTCAGTGTCTTGGGAGGCGTTGATTTGTGTCGGATCGTCCAAGAAGAGAGCGAGGAAGG	14	WT	VKSATLSSTESTASGMQDEVRAVGEEQRSEEPKRRVDTSVSWEALICVGSSKKRARKASSSDDEGGPRTLGGDGHRAEEASKDKE	VKSATLSSTESTASGMQDEVRAVGEEQRSEEPKRRVDTSVSWEALICVGSSKKRARKASSSDDEGGPRTLGGDGHRAEEASKDKE
CACGGCGTCTGGAATGCAGGATGAGGTCAGAGCGGTTGGCGAGGAGCAAAGGTCAGAGGAGCCAAAGCGCAGGGTGGATACTTCAGTGTCTTGGGAGGCGTTGATTTGTGTCGGATCGTCCAAGAAGAGAGCGAGGAAGG	CACGGCGTCTGGAATGCAGGATGAGGTCAGAGCGGTTGGCGAGGAGCAAAGGTCAGAGGAGCCAAAGCGCAGGGTGGATACTTCAGTGTCTCGGGAGGCGTTGATTTGTGTCGGATCGTCCAAGAAGAGAGCGAGGAAGG	14	WT	VKSATLSSTESTASGMQDEVRAVGEEQRSEEPKRRVDTSVSWEALICVGSSKKRARKASSSDDEGGPRTLGGDGHRAEEASKDKE	VKSATLSSTESTASGMQDEVRAVGEEQRSEEPKRRVDTSVSWEALICVGSSKKRARKASSSDDEGGPRTLGGDGHRAEEASKDKE
CACGGCGTCTGGAATGCAGGATGAGGTCAGAGCGGTTGGCGAGGAGCAAAGGTCAGAGGAGCCAAAGCGCAGGGTGGATACTTCAGTGTCTTGGGAGGCGTTGATTTGTGTCGGATCGTCCAAGAAGAGAGCGAGGAAGG	CACGGCGTCTGGAATGCAGGATGAGGTCAGAGCGGTTGGCGAGGAGCAAAGGTCAGAGGAGCCAAAGCACAGGGTGGATACTTCAGTGTCTTGGGAGGCGTTGATTTGTGTCGGATCGTCCAAGAAGAGAGCGAGGAAGG	14	WT	VKSATLSSTESTASGMQDEVRAVGEEQRSEEPKRRVDTSVSWEALICVGSSKKRARKASSSDDEGGPRTLGGDGHRAEEASKDKE	VKSATLSSTESTASGMQDEVRAVGEEQRSEEPKRRVDTSVSWEALICVGSSKKRARKASSSDDEGGPRTLGGDGHRAEEASKDKE
CACGGCGTCTGGAATGCAGGATGAGGTCAGAGCGGTTGGCGAGGAGCAAAGGTCAGAGGAGCCAAAGCGCAGGGTGGATACTTCAGTGTCTTGGGAGGCGTTGATTTGTGTCGGATCGTCCAAGAAGAGAGCGAGGAAGG	CACGGCGTCTGGAATGCAGGATGAGGTCAGAGCGGTTGGCGAGGAGCAAAGGTCAGAGGAGCCAAAGCGCAAGGTGGATACTTCAGTGTCTTGGGAGGCGTTGATTTGTGTCGGATCGTCCAAGAAGAGAGCGAGGAAGG	14	WT	VKSATLSSTESTASGMQDEVRAVGEEQRSEEPKRRVDTSVSWEALICVGSSKKRARKASSSDDEGGPRTLGGDGHRAEEASKDKE	VKSATLSSTESTASGMQDEVRAVGEEQRSEEPKRRVDTSVSWEALICVGSSKKRARKASSSDDEGGPRTLGGDGHRAEEASKDKE
CACGGCGTCTGGAATGCAGGATGAGGTCAGAGCGGTTGGCGAGGAGCAAAGGTCAGAGGAGCCAAAGCGCAGGGTGGATACTTCAGTGTCTTGGGAGGCGTTGATTTGTGTCGGATCGTCCAAGAAGAGAGCGAGGAAGG	CACGGCGTCTGGAATGCAGGATGAGGTCAGAGCAGTTGGCGAGGAGCAAAGGTCAGAGGAGCCAAAGCGCAGGGTGGATACTTCAGTGTCTTGGGAGGCGTTGATTTGTGTCGGATCGTCCAAGAAGAGAGCGAGGAAGG	14	WT	VKSATLSSTESTASGMQDEVRAVGEEQRSEEPKRRVDTSVSWEALICVGSSKKRARKASSSDDEGGPRTLGGDGHRAEEASKDKE	VKSATLSSTESTASGMQDEVRAVGEEQRSEEPKRRVDTSVSWEALICVGSSKKRARKASSSDDEGGPRTLGGDGHRAEEASKDKE
CACGGCGTCTGGAATGCAGGATGAGGTCAGAGCGGTTGGCGAGGAGCAAAGGTCAGAGGAGCCAAAGCGCAGGGTGGATACTTCAGTGTCTTGGGAGGCGTTGATTTGTGTCGGATCGTCCAAGAAGAGAGCGAGGAAGG	CACGGCGTCTGGAATGCAGGATGAGGTCAGAGCGGTTGGCGAGGAGCAAAGGTCAGAGGAGCCAAAGCGCAGGGTGGATACTTCAGTGTCTTGGGAGGCGTTGATTTGTGTCGGATTGTCCAAGAAGAGAGCGAGGAAGG	13	WT	VKSATLSSTESTASGMQDEVRAVGEEQRSEEPKRRVDTSVSWEALICVGSSKKRARKASSSDDEGGPRTLGGDGHRAEEASKDKE	VKSATLSSTESTASGMQDEVRAVGEEQRSEEPKRRVDTSVSWEALICVGSSKKRARKASSSDDEGGPRTLGGDGHRAEEASKDKE
CACGGCGTCTGGAATGCAGGATGAGGTCAGAGCGGTTGGCGAGGAGCAAAGGTCAGAGGAGCCAAAGCGCAGGGTGGATACTTCAGTGTCTTGGGAGGCGTTGATTTGTGTCGGATCGTCCAAGAAGAGAGCGAGGAAGG	CACGGCGTCTGGACTGCAGGATGAGGTCAGAGCGGTTGGCGAGGAGCAAAGGTCAGAGGAGCCAAAGCGCAGGGTGGATACTTCAGTGTCTTGGGAGGCGTTGATTTGTGTCGGATCGTCCAAGAAGAGAGCGAGGAAGG	13	WT	VKSATLSSTESTASGMQDEVRAVGEEQRSEEPKRRVDTSVSWEALICVGSSKKRARKASSSDDEGGPRTLGGDGHRAEEASKDKE	VKSATLSSTESTASGMQDEVRAVGEEQRSEEPKRRVDTSVSWEALICVGSSKKRARKASSSDDEGGPRTLGGDGHRAEEASKDKE
CACGGCGTCTGGAATGCAGGATGAGGTCAGAGCGGTTGGCGAGGAGCAAAGGTCAGAGGAGCCAAAGCGCAGGGTGGATACTTCAGTGTCTTGGGAGGCGTTGATTTGTGTCGGATCGTCCAAGAAGAGAGCGAGGAAGG	CACGGCGTCTGGAATGCAGGATGAGGTCAGAGCGGTTGGCGAGGAACAAAGGTCAGAGGAGCCAAAGCGCAGGGTGGATACTTCAGTGTCTTGGGAGGCGTTGATTTGTGTCGGATCGTCCAAGAAGAGAGCGAGGAAGG	13	WT	VKSATLSSTESTASGMQDEVRAVGEEQRSEEPKRRVDTSVSWEALICVGSSKKRARKASSSDDEGGPRTLGGDGHRAEEASKDKE	VKSATLSSTESTASGMQDEVRAVGEEQRSEEPKRRVDTSVSWEALICVGSSKKRARKASSSDDEGGPRTLGGDGHRAEEASKDKE
CACGGCGTCTGGAATGCAGGATGAGGTCAGAGCGGTTGGCGAGGAGCAAAGGTCAGAGGAGCCAAAGCGCAGGGTGGATACTTCAGTGTCTTGGGAGGCGTTGATTTGTGTCGGATCGTCCAAGAAGAGAGCGAGGAAGG	CACGGCGTCTGGAATGCAGGATGAGGTCAGAGCGGTCGGCGAGGAGCAAAGGTCAGAGGAGCCAAAGCGCAGGGTGGATACTTCAGTGTCTTGGGAGGCGTTGATTTGTGTCGGATCGTCCAAGAAGAGAGCGAGGAAGG	13	WT	VKSATLSSTESTASGMQDEVRAVGEEQRSEEPKRRVDTSVSWEALICVGSSKKRARKASSSDDEGGPRTLGGDGHRAEEASKDKE	VKSATLSSTESTASGMQDEVRAVGEEQRSEEPKRRVDTSVSWEALICVGSSKKRARKASSSDDEGGPRTLGGDGHRAEEASKDKE
CACGGCGTCTGGAATGCAGGATGAGGTCAGAGCGGTTGGCGAGGAGCAAAGGTCAGAGGAGCCAAAGCGCAGGGTGGATACTTCAGTGTCTTGGGAGGCGTTGATTTGTGTCGGATCGTCCAAGAAGAGAGCGAGGAAGG	CACGGCGTCTGGAATGCAGGATGAGGTCAGAGCGGTTGGCGAGGAGCAAAGGTCAGAGGAGCCAAAGCGCAGGGTGGATACTTCAGTGTCTTGGGAGGCGTTGATTTGTGTCGGATCGTCCAAGAAGAAAGCGAGGAAGG	13	WT	VKSATLSSTESTASGMQDEVRAVGEEQRSEEPKRRVDTSVSWEALICVGSSKKRARKASSSDDEGGPRTLGGDGHRAEEASKDKE	VKSATLSSTESTASGMQDEVRAVGEEQRSEEPKRRVDTSVSWEALICVGSSKKRARKASSSDDEGGPRTLGGDGHRAEEASKDKE
CACGGCGTCTGGAATGCAGGATGAGGTCAGAGCGGTTGGCGAGGAGCAAAGGTCAGAGGAGCCAAAGCGCAGGGTGGATACTTCAGTGTCTTGGGAGGCGTTGATTTGTGTCGGATCGTCCAAGAAGAGAGCGAGGAAGG	CACGGCGTCTGGAATGCAGGATGAGGTCAGAGCGGTTGGCGAGGAGCAAAGGTCAGAGGAGCCAAAGCGCAGGGTGGATACTTCAGTGTCTTGGGAGGTGTTGATTTGTGTCGGATCGTCCAAGAAGAGAGCGAGGAAGG	12	WT	VKSATLSSTESTASGMQDEVRAVGEEQRSEEPKRRVDTSVSWEALICVGSSKKRARKASSSDDEGGPRTLGGDGHRAEEASKDKE	VKSATLSSTESTASGMQDEVRAVGEEQRSEEPKRRVDTSVSWEALICVGSSKKRARKASSSDDEGGPRTLGGDGHRAEEASKDKE
CACGGCGTCTGGAATGCAGGATGAGGTCAGAGCGGTTGGCGAGGAGCAAAGGTCAGAGGAGCCAAAGCGCAGGGTGGATACTTCAGTGTCTTGGGAGGCGTTGATTTGTGTCGGATCGTCCAAGAAGAGAGCGAGGAAGG	CACGGCGTCTGGAATGCAGGATGAGGTCAGAGCGGTTGGCGAGGAGCAAAGGTCAGAGGAGCCAAAGCGCAGGGTGGATACTTCAGTGTCTTGGGAGGCGTTGATTTGTGTCGGATCGTCCAAGAAGAGAGCGAGAAAGG	12	WT	VKSATLSSTESTASGMQDEVRAVGEEQRSEEPKRRVDTSVSWEALICVGSSKKRARKASSSDDEGGPRTLGGDGHRAEEASKDKE	VKSATLSSTESTASGMQDEVRAVGEEQRSEEPKRRVDTSVSWEALICVGSSKKRARKASSSDDEGGPRTLGGDGHRAEEASKDKE
CACGGCGTCTGGAATGCAGGATGAGGTCAGAGCGGTTGGCGAGGAGCAAAGGTCAGAGGAGCCAAAGCGCAGGGTGGATACTTCAGTGTCTTGGGAGGCGTTGATTTGTGTCGGATCGTCCAAGAAGAGAGCGAGGAAGG	CACGGCGTCTGGAATGCAGGATGAGGTCAGAGCGGTTAGCGAGGAGCAAAGGTCAGAGGAGCCAAAGCGCAGGGTGGATACTTCAGTGTCTTGGGAGGCGTTGATTTGTGTCGGATCGTCCAAGAAGAGAGCGAGGAAGG	12	WT	VKSATLSSTESTASGMQDEVRAVGEEQRSEEPKRRVDTSVSWEALICVGSSKKRARKASSSDDEGGPRTLGGDGHRAEEASKDKE	VKSATLSSTESTASGMQDEVRAVGEEQRSEEPKRRVDTSVSWEALICVGSSKKRARKASSSDDEGGPRTLGGDGHRAEEASKDKE
CACGGCGTCTGGAATGCAGGATGAGGTCAGAGCGGTTGGCGAGGAGCAAAGGTCAGAGGAGCCAAAGCGCAGGGTGGATACTTCAGTGTCTTGGGAGGCGTTGATTTGTGTCGGATCGTCCAAGAAGAGAGCGAGGAAGG	CACGGCGTCTGGAATGCAGGATGAGGTCAGAGCGGTTGGCGTGGAGCAAAGGTCAGAGGAGCCAAAGCGCAGGGTGGATACTTCAGTGTCTTGGGAGGCGTTGATTTGTGTCGGATCGTCCAAGAAGAGAGCGAGGAAGG	12	WT	VKSATLSSTESTASGMQDEVRAVGEEQRSEEPKRRVDTSVSWEALICVGSSKKRARKASSSDDEGGPRTLGGDGHRAEEASKDKE	VKSATLSSTESTASGMQDEVRAVGEEQRSEEPKRRVDTSVSWEALICVGSSKKRARKASSSDDEGGPRTLGGDGHRAEEASKDKE
CACGGCGTCTGGAATGCAGGATGAGGTCAGAGCGGTTGGCGAGGAGCAAAGGTCAGAGGAGCCAAAGCGCAGGGTGGATACTTCAGTGTCTTGGGAGGCGTTGATTTGTGTCGGATCGTCCAAGAAGAGAGCGAGGAAGG	CACGGCGTCTGGAATGCAGGATGAGATCAGAGCGGTTGGCGAGGAGCAAAGGTCAGAGGAGCCAAAGCGCAGGGTGGATACTTCAGTGTCTTGGGAGGCGTTGATTTGTGTCGGATCGTCCAAGAAGAGAGCGAGGAAGG	12	WT	VKSATLSSTESTASGMQDEVRAVGEEQRSEEPKRRVDTSVSWEALICVGSSKKRARKASSSDDEGGPRTLGGDGHRAEEASKDKE	VKSATLSSTESTASGMQDEVRAVGEEQRSEEPKRRVDTSVSWEALICVGSSKKRARKASSSDDEGGPRTLGGDGHRAEEASKDKE
CACGGCGTCTGGAATGCAGGATGAGGTCAGAGCGGTTGGCGAGGAGCAAAGGTCAGAGGAGCCAAAGCGCAGGGTGGATACTTCAGTGTCTTGGGAGGCGTTGATTTGTGTCGGATCGTCCAAGAAGAGAGCGAGGAAGG	CACGGCGTCTGGAATGCAGGATGAGGTCAGAGCGGTTGGCGAGGAGCAAAGGTCAGAGGAGCCAATGCGCAGGGTGGATACTTCAGTGTCTTGGGAGGCGTTGATTTGTGTCGGATCGTCCAAGAAGAGAGCGAGGAAGG	12	WT	VKSATLSSTESTASGMQDEVRAVGEEQRSEEPKRRVDTSVSWEALICVGSSKKRARKASSSDDEGGPRTLGGDGHRAEEASKDKE	VKSATLSSTESTASGMQDEVRAVGEEQRSEEPKRRVDTSVSWEALICVGSSKKRARKASSSDDEGGPRTLGGDGHRAEEASKDKE
CACGGCGTCTGGAATGCAGGATGAGGTCAGAGCGGTTGGCGAGGAGCAAAGGTCAGAGGAGCCAAAGCGCAGGGTGGATACTTCAGTGTCTTGGGAGGCGTTGATTTGTGTCGGATCGTCCAAGAAGAGAGCGAGGAAGG	CACGGCGTCTGGAATGCAGGATGAGGTCAGAGCGGTTGGCGAGGAGCAAAGGTCAGAGGAGCCAAAGCGCATGGTGGATACTTCAGTGTCTTGGGAGGCGTTGATTTGTGTCGGATCGTCCAAGAAGAGAGCGAGGAAGG	12	WT	VKSATLSSTESTASGMQDEVRAVGEEQRSEEPKRRVDTSVSWEALICVGSSKKRARKASSSDDEGGPRTLGGDGHRAEEASKDKE	VKSATLSSTESTASGMQDEVRAVGEEQRSEEPKRRVDTSVSWEALICVGSSKKRARKASSSDDEGGPRTLGGDGHRAEEASKDKE
CACGGCGTCTGGAATGCAGGATGAGGTCAGAGCGGTTGGCGAGGAGCAAAGGTCAGAGGAGCCAAAGCGCAGGGTGGATACTTCAGTGTCTTGGGAGGCGTTGATTTGTGTCGGATCGTCCAAGAAGAGAGCGAGGAAGG	CACGGCGTCTGGAATGCAGGATGAGGTCAGAGCGGTTGGCGAGGAGCACAGGTCAGAGGAGCCAAAGCGCAGGGTGGATACTTCAGTGTCTTGGGAGGCGTTGATTTGTGTCGGATCGTCCAAGAAGAGAGCGAGGAAGG	11	WT	VKSATLSSTESTASGMQDEVRAVGEEQRSEEPKRRVDTSVSWEALICVGSSKKRARKASSSDDEGGPRTLGGDGHRAEEASKDKE	VKSATLSSTESTASGMQDEVRAVGEEQRSEEPKRRVDTSVSWEALICVGSSKKRARKASSSDDEGGPRTLGGDGHRAEEASKDKE
CACGGCGTCTGGAATGCAGGATGAGGTCAGAGCGGTTGGCGAGGAGCAAAGGTCAGAGGAGCCAAAGCGCAGGGTGGATACTTCAGTGTCTTGGGAGGCGTTGATTTGTGTCGGATCGTCCAAGAAGAGAGCGAGGAAGG	CACGGCGTCTGGAATGCAGGATGAGGTCAGAGCGGTTGGCGAGGAGCAAAGGTCAGAGGAGCCAAAGCGCAGGGTGGATACTTCAGTGTCTTGAGAGGCGTTGATTTGTGTCGGATCGTCCAAGAAGAGAGCGAGGAAGG	11	WT	VKSATLSSTESTASGMQDEVRAVGEEQRSEEPKRRVDTSVSWEALICVGSSKKRARKASSSDDEGGPRTLGGDGHRAEEASKDKE	VKSATLSSTESTASGMQDEVRAVGEEQRSEEPKRRVDTSVSWEALICVGSSKKRARKASSSDDEGGPRTLGGDGHRAEEASKDKE
CACGGCGTCTGGAATGCAGGATGAGGTCAGAGCGGTTGGCGAGGAGCAAAGGTCAGAGGAGCCAAAGCGCAGGGTGGATACTTCAGTGTCTTGGGAGGCGTTGATTTGTGTCGGATCGTCCAAGAAGAGAGCGAGGAAGG	CACGGCGTCTGGAATGCAGGATGAGGTCAGAGCGGTTGGCGAGGAGCAAAGGTCAGAGGAGCCAAAGCGCAGGGTGGATACTTCAGTGTCTTGGGAGGCGTTGATTTGTGTCGGATCGTCCAAGAAGAGAGCGATGAAGG	11	WT	VKSATLSSTESTASGMQDEVRAVGEEQRSEEPKRRVDTSVSWEALICVGSSKKRARKASSSDDEGGPRTLGGDGHRAEEASKDKE	VKSATLSSTESTASGMQDEVRAVGEEQRSEEPKRRVDTSVSWEALICVGSSKKRARKASSSDDEGGPRTLGGDGHRAEEASKDKE
CACGGCGTCTGGAATGCAGGATGAGGTCAGAGCGGTTGGCGAGGAGCAAAGGTCAGAGGAGCCAAAGCGCAGGGTGGATACTTCAGTGTCTTGGGAGGCGTTGATTTGTGTCGGATCGTCCAAGAAGAGAGCGAGGAAGG	CACGGCGTCTGGAATGCAGGATGAGGTCAGAGCGGTTGGCGAGGAGCAAAGGTCAGAGGAACCAAAGCGCAGGGTGGATACTTCAGTGTCTTGGGAGGCGTTGATTTGTGTCGGATCGTCCAAGAAGAGAGCGAGGAAGG	11	WT	VKSATLSSTESTASGMQDEVRAVGEEQRSEEPKRRVDTSVSWEALICVGSSKKRARKASSSDDEGGPRTLGGDGHRAEEASKDKE	VKSATLSSTESTASGMQDEVRAVGEEQRSEEPKRRVDTSVSWEALICVGSSKKRARKASSSDDEGGPRTLGGDGHRAEEASKDKE
CACGGCGTCTGGAATGCAGGATGAGGTCAGAGCGGTTGGCGAGGAGCAAAGGTCAGAGGAGCCAAAGCGCAGGGTGGATACTTCAGTGTCTTGGGAGGCGTTGATTTGTGTCGGATCGTCCAAGAAGAGAGCGAGGAAGG	CACGGCGTCTGGAATGCAGGATGAGGTCAGAGCGGTTGGCGAGGAGCAAAGGTCAGAGGAGCCAAAGCGCAGGGTGGATACTTTAGTGTCTTGGGAGGCGTTGATTTGTGTCGGATCGTCCAAGAAGAGAGCGAGGAAGG	11	WT	VKSATLSSTESTASGMQDEVRAVGEEQRSEEPKRRVDTSVSWEALICVGSSKKRARKASSSDDEGGPRTLGGDGHRAEEASKDKE	VKSATLSSTESTASGMQDEVRAVGEEQRSEEPKRRVDTSVSWEALICVGSSKKRARKASSSDDEGGPRTLGGDGHRAEEASKDKE
CACGGCGTCTGGAATGCAGGATGAGGTCAGAGCGGTTGGCGAGGAGCAAAGGTCAGAGGAGCCAAAGCGCAGGGTGGATACTTCAGTGTCTTGGGAGGCGTTGATTTGTGTCGGATCGTCCAAGAAGAGAGCGAGGAAGG	CACGGCGTCTGGAATGCAGGATGAGGTCAGAGCGGTTGGCGAGGAGCAAAGGTCAGAGGAGCCAAAGCGCAGGGTGGATACTTCAGTGTCTTGGGAGGCGTTGATTTGTGTCGGATCTTCCAAGAAGAGAGCGAGGAAGG	11	WT	VKSATLSSTESTASGMQDEVRAVGEEQRSEEPKRRVDTSVSWEALICVGSSKKRARKASSSDDEGGPRTLGGDGHRAEEASKDKE	VKSATLSSTESTASGMQDEVRAVGEEQRSEEPKRRVDTSVSWEALICVGSSKKRARKASSSDDEGGPRTLGGDGHRAEEASKDKE
CACGGCGTCTGGAATGCAGGATGAGGTCAGAGCGGTTGGCGAGGAGCAAAGGTCAGAGGAGCCAAAGCGCAGGGTGGATACTTCAGTGTCTTGGGAGGCGTTGATTTGTGTCGGATCGTCCAAGAAGAGAGCGAGGAAGG	CACGGCGTCTGGAATGCAGGATGAGGTCAGAGCGGTTGGCGAGGAGCAAAGGTCAGAGGAGCCAAAGCGCAGGGTGGATACTTCAGTGTCTTGGGAGGCGTTGATTTGTGTCGGATCGTCCAAGAAGAGAGCGAGGATGG	11	WT	VKSATLSSTESTASGMQDEVRAVGEEQRSEEPKRRVDTSVSWEALICVGSSKKRARKASSSDDEGGPRTLGGDGHRAEEASKDKE	VKSATLSSTESTASGMQDEVRAVGEEQRSEEPKRRVDTSVSWEALICVGSSKKRARKASSSDDEGGPRTLGGDGHRAEEASKDKE
CACGGCGTCTGGAATGCAGGATGAGGTCAGAGCGGTTGGCGAGGAGCAAAGGTCAGAGGAGCCAAAGCGCAGGGTGGATACTTCAGTGTCTTGGGAGGCGTTGATTTGTGTCGGATCGTCCAAGAAGAGAGCGAGGAAGG	CACGGCGTCTGGAATGCAGGATGAGGTCAGAACGGTTGGCGAGGAGCAAAGGTCAGAGGAGCCAAAGCGCAGGGTGGATACTTCAGTGTCTTGGGAGGCGTTGATTTGTGTCGGATCGTCCAAGAAGAGAGCGAGGAAGG	11	WT	VKSATLSSTESTASGMQDEVRAVGEEQRSEEPKRRVDTSVSWEALICVGSSKKRARKASSSDDEGGPRTLGGDGHRAEEASKDKE	VKSATLSSTESTASGMQDEVRAVGEEQRSEEPKRRVDTSVSWEALICVGSSKKRARKASSSDDEGGPRTLGGDGHRAEEASKDKE
CACGGCGTCTGGAATGCAGGATGAGGTCAGAGCGGTTGGCGAGGAGCAAAGGTCAGAGGAGCCAAAGCGCAGGGTGGATACTTCAGTGTCTTGGGAGGCGTTGATTTGTGTCGGATCGTCCAAGAAGAGAGCGAGGAAGG	CACGGCGTCTGGAATGCAGGATGAGGTCAGAGCGGTTGGCGAGGAGCAAAGGTCAGAGGAGCCAAAGCGCAGGGTGGATACTTCAGTGTCTTGGGAAGCGTTGATTTGTGTCGGATCGTCCAAGAAGAGAGCGAGGAAGG	11	WT	VKSATLSSTESTASGMQDEVRAVGEEQRSEEPKRRVDTSVSWEALICVGSSKKRARKASSSDDEGGPRTLGGDGHRAEEASKDKE	VKSATLSSTESTASGMQDEVRAVGEEQRSEEPKRRVDTSVSWEALICVGSSKKRARKASSSDDEGGPRTLGGDGHRAEEASKDKE
CACGGCGTCTGGAATGCAGGATGAGGTCAGAGCGGTTGGCGAGGAGCAAAGGTCAGAGGAGCCAAAGCGCAGGGTGGATACTTCAGTGTCTTGGGAGGCGTTGATTTGTGTCGGATCGTCCAAGAAGAGAGCGAGGAAGG	CACGGCGTCTGGAATGCAGGATGAGGTCAGAGCGGTTGGCGAGGAGCAAAGGTCAGAGGAGCCAAAGCGCAGGGTGGATACTTCAGTGTCTTGGGAGGCGTTGATTTGTGTCTGATCGTCCAAGAAGAGAGCGAGGAAGG	11	WT	VKSATLSSTESTASGMQDEVRAVGEEQRSEEPKRRVDTSVSWEALICVGSSKKRARKASSSDDEGGPRTLGGDGHRAEEASKDKE	VKSATLSSTESTASGMQDEVRAVGEEQRSEEPKRRVDTSVSWEALICVGSSKKRARKASSSDDEGGPRTLGGDGHRAEEASKDKE
CACGGCGTCTGGAATGCAGGATGAGGTCAGAGCGGTTGGCGAGGAGCAAAGGTCAGAGGAGCCAAAGCGCAGGGTGGATACTTCAGTGTCTTGGGAGGCGTTGATTTGTGTCGGATCGTCCAAGAAGAGAGCGAGGAAGG	CACGGCGTCTGGAATGCAGGATGAGGTCAGAGCGGTTGGCGAGGAGCAAAGGTCAGAGGAGCCAAAGCGCAGGGTGGATACTTCAGTGTCTTGGGAGGCGTTAATTTGTGTCGGATCGTCCAAGAAGAGAGCGAGGAAGG	11	WT	VKSATLSSTESTASGMQDEVRAVGEEQRSEEPKRRVDTSVSWEALICVGSSKKRARKASSSDDEGGPRTLGGDGHRAEEASKDKE	VKSATLSSTESTASGMQDEVRAVGEEQRSEEPKRRVDTSVSWEALICVGSSKKRARKASSSDDEGGPRTLGGDGHRAEEASKDKE
CACGGCGTCTGGAATGCAGGATGAGGTCAGAGCGGTTGGCGAGGAGCAAAGGTCAGAGGAGCCAAAGCGCAGGGTGGATACTTCAGTGTCTTGGGAGGCGTTGATTTGTGTCGGATCGTCCAAGAAGAGAGCGAGGAAGG	CACGGCGTCTGGAATGCAGGATGAGGTCAAAGCGGTTGGCGAGGAGCAAAGGTCAGAGGAGCCAAAGCGCAGGGTGGATACTTCAGTGTCTTGGGAGGCGTTGATTTGTGTCGGATCGTCCAAGAAGAGAGCGAGGAAGG	11	WT	VKSATLSSTESTASGMQDEVRAVGEEQRSEEPKRRVDTSVSWEALICVGSSKKRARKASSSDDEGGPRTLGGDGHRAEEASKDKE	VKSATLSSTESTASGMQDEVRAVGEEQRSEEPKRRVDTSVSWEALICVGSSKKRARKASSSDDEGGPRTLGGDGHRAEEASKDKE
CACGGCGTCTGGAATGCAGGATGAGGTCAGAGCGGTTGGCGAGGAGCAAAGGTCAGAGGAGCCAAAGCGCAGGGTGGATACTTCAGTGTCTTGGGAGGCGTTGATTTGTGTCGGATCGTCCAAGAAGAGAGCGAGGAAGG	CACGGCGTCTGGAATGCAGGATGTGGTCAGAGCGGTTGGCGAGGAGCAAAGGTCAGAGGAGCCAAAGCGCAGGGTGGATACTTCAGTGTCTTGGGAGGCGTTGATTTGTGTCGGATCGTCCAAGAAGAGAGCGAGGAAGG	11	WT	VKSATLSSTESTASGMQDEVRAVGEEQRSEEPKRRVDTSVSWEALICVGSSKKRARKASSSDDEGGPRTLGGDGHRAEEASKDKE	VKSATLSSTESTASGMQDEVRAVGEEQRSEEPKRRVDTSVSWEALICVGSSKKRARKASSSDDEGGPRTLGGDGHRAEEASKDKE
CACGGCGTCTGGAATGCAGGATGAGGTCAGAGCGGTTGGCGAGGAGCAAAGGTCAGAGGAGCCAAAGCGCAGGGTGGATACTTCAGTGTCTTGGGAGGCGTTGATTTGTGTCGGATCGTCCAAGAAGAGAGCGAGGAAGG	CACGGCGTCTGGAATGCAGGATGAGGTCAGAGCGGTTGGCGAGGAGCAAAGGTCAGAGGAGCCAAAGCGCAGGGTGGATACTTCAGTGTCTTGGGAGGCATTGATTTGTGTCGGATCGTCCAAGAAGAGAGCGAGGAAGG	10	WT	VKSATLSSTESTASGMQDEVRAVGEEQRSEEPKRRVDTSVSWEALICVGSSKKRARKASSSDDEGGPRTLGGDGHRAEEASKDKE	VKSATLSSTESTASGMQDEVRAVGEEQRSEEPKRRVDTSVSWEALICVGSSKKRARKASSSDDEGGPRTLGGDGHRAEEASKDKE
CACGGCGTCTGGAATGCAGGATGAGGTCAGAGCGGTTGGCGAGGAGCAAAGGTCAGAGGAGCCAAAGCGCAGGGTGGATACTTCAGTGTCTTGGGAGGCGTTGATTTGTGTCGGATCGTCCAAGAAGAGAGCGAGGAAGG	CACGGCGTCTGGAATGCAGGATGAGGTCAGAGCGGTTGGCGAGGAGCAAAGGTCAGAGGAGCCACAGCGCAGGGTGGATACTTCAGTGTCTTGGGAGGCGTTGATTTGTGTCGGATCGTCCAAGAAGAGAGCGAGGAAGG	10	WT	VKSATLSSTESTASGMQDEVRAVGEEQRSEEPKRRVDTSVSWEALICVGSSKKRARKASSSDDEGGPRTLGGDGHRAEEASKDKE	VKSATLSSTESTASGMQDEVRAVGEEQRSEEPKRRVDTSVSWEALICVGSSKKRARKASSSDDEGGPRTLGGDGHRAEEASKDKE
CACGGCGTCTGGAATGCAGGATGAGGTCAGAGCGGTTGGCGAGGAGCAAAGGTCAGAGGAGCCAAAGCGCAGGGTGGATACTTCAGTGTCTTGGGAGGCGTTGATTTGTGTCGGATCGTCCAAGAAGAGAGCGAGGAAGG	CACGGCGTCTGGAATGCAGGATGAGGTCAGAGCGGTTGGCGAGGAGCAAAGGTCAGAGGAGCCAAAGCGCAGGGTGGATACTTCAGTGTCTTGGGAGGCGTTGATTTGTGTCGGATCGTCCAAGAAGAGTGCGAGGAAGG	10	WT	VKSATLSSTESTASGMQDEVRAVGEEQRSEEPKRRVDTSVSWEALICVGSSKKRARKASSSDDEGGPRTLGGDGHRAEEASKDKE	VKSATLSSTESTASGMQDEVRAVGEEQRSEEPKRRVDTSVSWEALICVGSSKKRARKASSSDDEGGPRTLGGDGHRAEEASKDKE
CACGGCGTCTGGAATGCAGGATGAGGTCAGAGCGGTTGGCGAGGAGCAAAGGTCAGAGGAGCCAAAGCGCAGGGTGGATACTTCAGTGTCTTGGGAGGCGTTGATTTGTGTCGGATCGTCCAAGAAGAGAGCGAGGAAGG	CACGGCGTCTGGAATGCAGGATGAGGTCAGAGCGGTTGGCGAGGAGCAAAGGTCAGAGGAGCCAAAGCGCAGGGTGGATACTTCAGTGTCTTGGGAGGCGTTGATTTATGTCGGATCGTCCAAGAAGAGAGCGAGGAAGG	10	WT	VKSATLSSTESTASGMQDEVRAVGEEQRSEEPKRRVDTSVSWEALICVGSSKKRARKASSSDDEGGPRTLGGDGHRAEEASKDKE	VKSATLSSTESTASGMQDEVRAVGEEQRSEEPKRRVDTSVSWEALICVGSSKKRARKASSSDDEGGPRTLGGDGHRAEEASKDKE
CACGGCGTCTGGAATGCAGGATGAGGTCAGAGCGGTTGGCGAGGAGCAAAGGTCAGAGGAGCCAAAGCGCAGGGTGGATACTTCAGTGTCTTGGGAGGCGTTGATTTGTGTCGGATCGTCCAAGAAGAGAGCGAGGAAGG	CACGGCGTCTGGAATGCAGGATGAGGTCAGAGCGGTTGGCGAGGAGCAAAGGTCAGAGGAGCCAAAGCGCAGGGTGGATACTTCAGTGTCTTGGGAGGCGTTGATTTGTGTCGTATCGTCCAAGAAGAGAGCGAGGAAGG	10	WT	VKSATLSSTESTASGMQDEVRAVGEEQRSEEPKRRVDTSVSWEALICVGSSKKRARKASSSDDEGGPRTLGGDGHRAEEASKDKE	VKSATLSSTESTASGMQDEVRAVGEEQRSEEPKRRVDTSVSWEALICVGSSKKRARKASSSDDEGGPRTLGGDGHRAEEASKDKE
CACGGCGTCTGGAATGCAGGATGAGGTCAGAGCGGTTGGCGAGGAGCAAAGGTCAGAGGAGCCAAAGCGCAGGGTGGATACTTCAGTGTCTTGGGAGGCGTTGATTTGTGTCGGATCGTCCAAGAAGAGAGCGAGGAAGG	CACGGCGTCTGGAATGCAGGATGAGGTCAGAGCGGTTGGCGAGGAGCAAAGGTCAGAGGAGCCAAAGCGCAGGGTGGATACTTCAGTGTCTTAGGAGGCGTTGATTTGTGTCGGATCGTCCAAGAAGAGAGCGAGGAAGG	10	WT	VKSATLSSTESTASGMQDEVRAVGEEQRSEEPKRRVDTSVSWEALICVGSSKKRARKASSSDDEGGPRTLGGDGHRAEEASKDKE	VKSATLSSTESTASGMQDEVRAVGEEQRSEEPKRRVDTSVSWEALICVGSSKKRARKASSSDDEGGPRTLGGDGHRAEEASKDKE
CACGGCGTCTGGAATGCAGGATGAGGTCAGAGCGGTTGGCGAGGAGCAAAGGTCAGAGGAGCCAAAGCGCAGGGTGGATACTTCAGTGTCTTGGGAGGCGTTGATTTGTGTCGGATCGTCCAAGAAGAGAGCGAGGAAGG	CACGGCGTCTGGAATGCAGGATGAGGTCAGAGCGGGTGGCGAGGAGCAAAGGTCAGAGGAGCCAAAGCGCAGGGTGGATACTTCAGTGTCTTGGGAGGCGTTGATTTGTGTCGGATCGTCCAAGAAGAGAGCGAGGAAGG	10	WT	VKSATLSSTESTASGMQDEVRAVGEEQRSEEPKRRVDTSVSWEALICVGSSKKRARKASSSDDEGGPRTLGGDGHRAEEASKDKE	VKSATLSSTESTASGMQDEVRAVGEEQRSEEPKRRVDTSVSWEALICVGSSKKRARKASSSDDEGGPRTLGGDGHRAEEASKDKE
CACGGCGTCTGGAATGCAGGATGAGGTCAGAGCGGTTGGCGAGGAGCAAAGGTCAGAGGAGCCAAAGCGCAGGGTGGATACTTCAGTGTCTTGGGAGGCGTTGATTTGTGTCGGATCGTCCAAGAAGAGAGCGAGGAAGG	CACGACGTCTGGAATGCAGGATGAGGTCAGAGCGGTTGGCGAGGAGCAAAGGTCAGAGGAGCCAAAGCGCAGGGTGGATACTTCAGTGTCTTGGGAGGCGTTGATTTGTGTCGGATCGTCCAAGAAGAGAGCGAGGAAGG	10	WT	VKSATLSSTESTASGMQDEVRAVGEEQRSEEPKRRVDTSVSWEALICVGSSKKRARKASSSDDEGGPRTLGGDGHRAEEASKDKE	VKSATLSSTESTASGMQDEVRAVGEEQRSEEPKRRVDTSVSWEALICVGSSKKRARKASSSDDEGGPRTLGGDGHRAEEASKDKE
CACGGCGTCTGGAATGCAGGATGAGGTCAGAGCGGTTGGCGAGGAGCAAAGGTCAGAGGAGCCAAAGCGCAGGGTGGATACTTCAGTGTCTTGGGAGGCGTTGATTTGTGTCGGATCGTCCAAGAAGAGAGCGAGGAAGG	CACGGCGTCTGGAATGCAGGATGAGGTCAGAGCGGTTGGCGAGGAGCAAAGGTCAGAGGAGCCAAAGCGCAGGGTGGATACTTCAGTGTCTTGGGAGGCGTTGATTTGTATCGGATCGTCCAAGAAGAGAGCGAGGAAGG	10	WT	VKSATLSSTESTASGMQDEVRAVGEEQRSEEPKRRVDTSVSWEALICVGSSKKRARKASSSDDEGGPRTLGGDGHRAEEASKDKE	VKSATLSSTESTASGMQDEVRAVGEEQRSEEPKRRVDTSVSWEALICVGSSKKRARKASSSDDEGGPRTLGGDGHRAEEASKDKE
CACGGCGTCTGGAATGCAGGATGAGGTCAGAGCGGTTGGCGAGGAGCAAAGGTCAGAGGAGCCAAAGCGCAGGGTGGATACTTCAGTGTCTTGGGAGGCGTTGATTTGTGTCGGATCGTCCAAGAAGAGAGCGAGGAAGG	CACGGCGTCTGGAATGCAGGATGAGGTCAGAGTGGTTGGCGAGGAGCAAAGGTCAGAGGAGCCAAAGCGCAGGGTGGATACTTCAGTGTCTTGGGAGGCGTTGATTTGTGTCGGATCGTCCAAGAAGAGAGCGAGGAAGG	10	WT	VKSATLSSTESTASGMQDEVRAVGEEQRSEEPKRRVDTSVSWEALICVGSSKKRARKASSSDDEGGPRTLGGDGHRAEEASKDKE	VKSATLSSTESTASGMQDEVRAVGEEQRSEEPKRRVDTSVSWEALICVGSSKKRARKASSSDDEGGPRTLGGDGHRAEEASKDKE
CACGGCGTCTGGAATGCAGGATGAGGTCAGAGCGGTTGGCGAGGAGCAAAGGTCAGAGGAGCCAAAGCGCAGGGTGGATACTTCAGTGTCTTGGGAGGCGTTGATTTGTGTCGGATCGTCCAAGAAGAGAGCGAGGAAGG	CACGGCGTCTGGAATGCAGGATGAGGTCAGAGCGGTTGGCGAGGAGCAAAGGTCAGAGGAGCCAAAGCGCAGGGTGGATACTTCAGTGTCTTGGGAGGCGTTGATTTGTGTCGGATCGTCCAAGAAGAGAGCGAGGAAGA	10	WT	VKSATLSSTESTASGMQDEVRAVGEEQRSEEPKRRVDTSVSWEALICVGSSKKRARKASSSDDEGGPRTLGGDGHRAEEASKDKE	VKSATLSSTESTASGMQDEVRAVGEEQRSEEPKRRVDTSVSWEALICVGSSKKRARKASSSDDEGGPRTLGGDGHRAEEASKDKE
CACGGCGTCTGGAATGCAGGATGAGGTCAGAGCGGTTGGCGAGGAGCAAAGGTCAGAGGAGCCAAAGCGCAGGGTGGATACTTCAGTGTCTTGGGAGGCGTTGATTTGTGTCGGATCGTCCAAGAAGAGAGCGAGGAAGG	CTCGGCGTCTGGAATGCAGGATGAGGTCAGAGCGGTTGGCGAGGAGCAAAGGTCAGAGGAGCCAAAGCGCAGGGTGGATACTTCAGTGTCTTGGGAGGCGTTGATTTGTGTCGGATCGTCCAAGAAGAGAGCGAGGAAGG	9	WT	VKSATLSSTESTASGMQDEVRAVGEEQRSEEPKRRVDTSVSWEALICVGSSKKRARKASSSDDEGGPRTLGGDGHRAEEASKDKE	VKSATLSSTESTASGMQDEVRAVGEEQRSEEPKRRVDTSVSWEALICVGSSKKRARKASSSDDEGGPRTLGGDGHRAEEASKDKE
CACGGCGTCTGGAATGCAGGATGAGGTCAGAGCGGTTGGCGAGGAGCAAAGGTCAGAGGAGCCAAAGCGCAGGGTGGATACTTCAGTGTCTTGGGAGGCGTTGATTTGTGTCGGATCGTCCAAGAAGAGAGCGAGGAAGG	CACGGCGTCTGAAATGCAGGATGAGGTCAGAGCGGTTGGCGAGGAGCAAAGGTCAGAGGAGCCAAAGCGCAGGGTGGATACTTCAGTGTCTTGGGAGGCGTTGATTTGTGTCGGATCGTCCAAGAAGAGAGCGAGGAAGG	9	WT	VKSATLSSTESTASGMQDEVRAVGEEQRSEEPKRRVDTSVSWEALICVGSSKKRARKASSSDDEGGPRTLGGDGHRAEEASKDKE	VKSATLSSTESTASGMQDEVRAVGEEQRSEEPKRRVDTSVSWEALICVGSSKKRARKASSSDDEGGPRTLGGDGHRAEEASKDKE
CACGGCGTCTGGAATGCAGGATGAGGTCAGAGCGGTTGGCGAGGAGCAAAGGTCAGAGGAGCCAAAGCGCAGGGTGGATACTTCAGTGTCTTGGGAGGCGTTGATTTGTGTCGGATCGTCCAAGAAGAGAGCGAGGAAGG	CACGGCGTCTGGAATGCAGGATGAGGTCAGAGCGGTTGGCGAGGAGCAAAGGTCAGAGGAGCCAAAGCGCAGGGTTGATACTTCAGTGTCTTGGGAGGCGTTGATTTGTGTCGGATCGTCCAAGAAGAGAGCGAGGAAGG	9	WT	VKSATLSSTESTASGMQDEVRAVGEEQRSEEPKRRVDTSVSWEALICVGSSKKRARKASSSDDEGGPRTLGGDGHRAEEASKDKE	VKSATLSSTESTASGMQDEVRAVGEEQRSEEPKRRVDTSVSWEALICVGSSKKRARKASSSDDEGGPRTLGGDGHRAEEASKDKE
CACGGCGTCTGGAATGCAGGATGAGGTCAGAGCGGTTGGCGAGGAGCAAAGGTCAGAGGAGCCAAAGCGCAGGGTGGATACTTCAGTGTCTTGGGAGGCGTTGATTTGTGTCGGATCGTCCAAGAAGAGAGCGAGGAAGG	CACGGCGTCTGGAATGCAGGATGAGGTCAGAGCGGTTGGCGAGGAGCAAAGGTCAGAGGAGCCAAAGCGCAGGGTGGATACTTCAGTGTCTTGGGAGGCGTTGATTTGTGTCGGATCGTCCAAGAAGAGAACGAGGAAGG	9	WT	VKSATLSSTESTASGMQDEVRAVGEEQRSEEPKRRVDTSVSWEALICVGSSKKRARKASSSDDEGGPRTLGGDGHRAEEASKDKE	VKSATLSSTESTASGMQDEVRAVGEEQRSEEPKRRVDTSVSWEALICVGSSKKRARKASSSDDEGGPRTLGGDGHRAEEASKDKE
CACGGCGTCTGGAATGCAGGATGAGGTCAGAGCGGTTGGCGAGGAGCAAAGGTCAGAGGAGCCAAAGCGCAGGGTGGATACTTCAGTGTCTTGGGAGGCGTTGATTTGTGTCGGATCGTCCAAGAAGAGAGCGAGGAAGG	CACGGCGTCTGGAATGCAGGATGAGGTCAGAGCGGTTGGCGAGGAGCAAATGTCAGAGGAGCCAAAGCGCAGGGTGGATACTTCAGTGTCTTGGGAGGCGTTGATTTGTGTCGGATCGTCCAAGAAGAGAGCGAGGAAGG	9	WT	VKSATLSSTESTASGMQDEVRAVGEEQRSEEPKRRVDTSVSWEALICVGSSKKRARKASSSDDEGGPRTLGGDGHRAEEASKDKE	VKSATLSSTESTASGMQDEVRAVGEEQRSEEPKRRVDTSVSWEALICVGSSKKRARKASSSDDEGGPRTLGGDGHRAEEASKDKE
CACGGCGTCTGGAATGCAGGATGAGGTCAGAGCGGTTGGCGAGGAGCAAAGGTCAGAGGAGCCAAAGCGCAGGGTGGATACTTCAGTGTCTTGGGAGGCGTTGATTTGTGTCGGATCGTCCAAGAAGAGAGCGAGGAAGG	CACGGCGTCTGGAATGCAGGATGAGGTCAGAGCGGTTGGCGAGGAGCATAGGTCAGAGGAGCCAAAGCGCAGGGTGGATACTTCAGTGTCTTGGGAGGCGTTGATTTGTGTCGGATCGTCCAAGAAGAGAGCGAGGAAGG	9	WT	VKSATLSSTESTASGMQDEVRAVGEEQRSEEPKRRVDTSVSWEALICVGSSKKRARKASSSDDEGGPRTLGGDGHRAEEASKDKE	VKSATLSSTESTASGMQDEVRAVGEEQRSEEPKRRVDTSVSWEALICVGSSKKRARKASSSDDEGGPRTLGGDGHRAEEASKDKE
CACGGCGTCTGGAATGCAGGATGAGGTCAGAGCGGTTGGCGAGGAGCAAAGGTCAGAGGAGCCAAAGCGCAGGGTGGATACTTCAGTGTCTTGGGAGGCGTTGATTTGTGTCGGATCGTCCAAGAAGAGAGCGAGGAAGG	CACGGCGTCTGGAATGCAGGATGAGGTCAGAGCGGTTGGCGAGGAGCAAAGGTCAGATGAGCCAAAGCGCAGGGTGGATACTTCAGTGTCTTGGGAGGCGTTGATTTGTGTCGGATCGTCCAAGAAGAGAGCGAGGAAGG	9	WT	VKSATLSSTESTASGMQDEVRAVGEEQRSEEPKRRVDTSVSWEALICVGSSKKRARKASSSDDEGGPRTLGGDGHRAEEASKDKE	VKSATLSSTESTASGMQDEVRAVGEEQRSEEPKRRVDTSVSWEALICVGSSKKRARKASSSDDEGGPRTLGGDGHRAEEASKDKE
CACGGCGTCTGGAATGCAGGATGAGGTCAGAGCGGTTGGCGAGGAGCAAAGGTCAGAGGAGCCAAAGCGCAGGGTGGATACTTCAGTGTCTTGGGAGGCGTTGATTTGTGTCGGATCGTCCAAGAAGAGAGCGAGGAAGG	CACGGCGTCTGGAATGCAGGATGAGGTCAGAGCGGTTGGCGAGGAGCAAAGGTCAGAGGAGCCAAAGCGCAGGATGGATACTTCAGTGTCTTGGGAGGCGTTGATTTGTGTCGGATCGTCCAAGAAGAGAGCGAGGAAGG	9	WT	VKSATLSSTESTASGMQDEVRAVGEEQRSEEPKRRVDTSVSWEALICVGSSKKRARKASSSDDEGGPRTLGGDGHRAEEASKDKE	VKSATLSSTESTASGMQDEVRAVGEEQRSEEPKRRVDTSVSWEALICVGSSKKRARKASSSDDEGGPRTLGGDGHRAEEASKDKE
CACGGCGTCTGGAATGCAGGATGAGGTCAGAGCGGTTGGCGAGGAGCAAAGGTCAGAGGAGCCAAAGCGCAGGGTGGATACTTCAGTGTCTTGGGAGGCGTTGATTTGTGTCGGATCGTCCAAGAAGAGAGCGAGGAAGG	CACGGCGTCTGGAATGCAGGATGAGGTCAGAGCGGTTGGCGAGGAGCAAAGGTCAGAGGAGCCAAAGCGCAGGGTGGATACTTCAGTGTCTTGGGAGGCGTTGATTTGTGTCGGATCGTCCAAGAAGAGAGCGAGGAATG	9	WT	VKSATLSSTESTASGMQDEVRAVGEEQRSEEPKRRVDTSVSWEALICVGSSKKRARKASSSDDEGGPRTLGGDGHRAEEASKDKE	VKSATLSSTESTASGMQDEVRAVGEEQRSEEPKRRVDTSVSWEALICVGSSKKRARKASSSDDEGGPRTLGGDGHRAEEASKDKE
CACGGCGTCTGGAATGCAGGATGAGGTCAGAGCGGTTGGCGAGGAGCAAAGGTCAGAGGAGCCAAAGCGCAGGGTGGATACTTCAGTGTCTTGGGAGGCGTTGATTTGTGTCGGATCGTCCAAGAAGAGAGCGAGGAAGG	CACGGCGTCTGGAATGCAGGATGAGGTCAGAGCGGTTGGCGAGGAGCAAAGGTCAGAGGAGCCAAAGCGCAGGGTGGATACTTCAGTGTCTTGGGAGACGTTGATTTGTGTCGGATCGTCCAAGAAGAGAGCGAGGAAGG	9	WT	VKSATLSSTESTASGMQDEVRAVGEEQRSEEPKRRVDTSVSWEALICVGSSKKRARKASSSDDEGGPRTLGGDGHRAEEASKDKE	VKSATLSSTESTASGMQDEVRAVGEEQRSEEPKRRVDTSVSWEALICVGSSKKRARKASSSDDEGGPRTLGGDGHRAEEASKDKE
CACGGCGTCTGGAATGCAGGATGAGGTCAGAGCGGTTGGCGAGGAGCAAAGGTCAGAGGAGCCAAAGCGCAGGGTGGATACTTCAGTGTCTTGGGAGGCGTTGATTTGTGTCGGATCGTCCAAGAAGAGAGCGAGGAAGG	CACGGCGTCTGGAATGCAGGATGAGGTCAGAGCGGTTGGCGAGGAGCAAAGGTCAGAGGAGCCAAAGTGCAGGGTGGATACTTCAGTGTCTTGGGAGGCGTTGATTTGTGTCGGATCGTCCAAGAAGAGAGCGAGGAAGG	9	WT	VKSATLSSTESTASGMQDEVRAVGEEQRSEEPKRRVDTSVSWEALICVGSSKKRARKASSSDDEGGPRTLGGDGHRAEEASKDKE	VKSATLSSTESTASGMQDEVRAVGEEQRSEEPKRRVDTSVSWEALICVGSSKKRARKASSSDDEGGPRTLGGDGHRAEEASKDKE
CACGGCGTCTGGAATGCAGGATGAGGTCAGAGCGGTTGGCGAGGAGCAAAGGTCAGAGGAGCCAAAGCGCAGGGTGGATACTTCAGTGTCTTGGGAGGCGTTGATTTGTGTCGGATCGTCCAAGAAGAGAGCGAGGAAGG	CACGGCGTCTGGAATGCAGGATGAGGTCAGAGCGGTTGGCGAGGAGCAAAGGTCAGAGGAGCCAAAGCGCAGTGTGGATACTTCAGTGTCTTGGGAGGCGTTGATTTGTGTCGGATCGTCCAAGAAGAGAGCGAGGAAGG	9	WT	VKSATLSSTESTASGMQDEVRAVGEEQRSEEPKRRVDTSVSWEALICVGSSKKRARKASSSDDEGGPRTLGGDGHRAEEASKDKE	VKSATLSSTESTASGMQDEVRAVGEEQRSEEPKRRVDTSVSWEALICVGSSKKRARKASSSDDEGGPRTLGGDGHRAEEASKDKE
CACGGCGTCTGGAATGCAGGATGAGGTCAGAGCGGTTGGCGAGGAGCAAAGGTCAGAGGAGCCAAAGCGCAGGGTGGATACTTCAGTGTCTTGGGAGGCGTTGATTTGTGTCGGATCGTCCAAGAAGAGAGCGAGGAAGG	CACGGCGTCTGGAATGCAGGATGAGGTCAGAGCGGTTGGCGAGGAGCAAAGGTCAGAGGAGCCAAAGCGCAGGGTGTATACTTCAGTGTCTTGGGAGGCGTTGATTTGTGTCGGATCGTCCAAGAAGAGAGCGAGGAAGG	8	WT	VKSATLSSTESTASGMQDEVRAVGEEQRSEEPKRRVDTSVSWEALICVGSSKKRARKASSSDDEGGPRTLGGDGHRAEEASKDKE	VKSATLSSTESTASGMQDEVRAVGEEQRSEEPKRRVDTSVSWEALICVGSSKKRARKASSSDDEGGPRTLGGDGHRAEEASKDKE
CACGGCGTCTGGAATGCAGGATGAGGTCAGAGCGGTTGGCGAGGAGCAAAGGTCAGAGGAGCCAAAGCGCAGGGTGGATACTTCAGTGTCTTGGGAGGCGTTGATTTGTGTCGGATCGTCCAAGAAGAGAGCGAGGAAGG	CACGGCGTTTGGAATGCAGGATGAGGTCAGAGCGGTTGGCGAGGAGCAAAGGTCAGAGGAGCCAAAGCGCAGGGTGGATACTTCAGTGTCTTGGGAGGCGTTGATTTGTGTCGGATCGTCCAAGAAGAGAGCGAGGAAGG	8	WT	VKSATLSSTESTASGMQDEVRAVGEEQRSEEPKRRVDTSVSWEALICVGSSKKRARKASSSDDEGGPRTLGGDGHRAEEASKDKE	VKSATLSSTESTASGMQDEVRAVGEEQRSEEPKRRVDTSVSWEALICVGSSKKRARKASSSDDEGGPRTLGGDGHRAEEASKDKE
CACGGCGTCTGGAATGCAGGATGAGGTCAGAGCGGTTGGCGAGGAGCAAAGGTCAGAGGAGCCAAAGCGCAGGGTGGATACTTCAGTGTCTTGGGAGGCGTTGATTTGTGTCGGATCGTCCAAGAAGAGAGCGAGGAAGG	CACGGCGTCTGGAATGCAGGATGAGGTCAGAGCGGTTGGCGAGGAGCAAAGGTCAGAGGAGCCAAAGCGCAGGGTGGATACTTCAGTGTCTTGGGAGGCGTTGATTTGTGTCGGATCGTCCAAGAAAAGAGCGAGGAAGG	8	WT	VKSATLSSTESTASGMQDEVRAVGEEQRSEEPKRRVDTSVSWEALICVGSSKKRARKASSSDDEGGPRTLGGDGHRAEEASKDKE	VKSATLSSTESTASGMQDEVRAVGEEQRSEEPKRRVDTSVSWEALICVGSSKKRARKASSSDDEGGPRTLGGDGHRAEEASKDKE
CACGGCGTCTGGAATGCAGGATGAGGTCAGAGCGGTTGGCGAGGAGCAAAGGTCAGAGGAGCCAAAGCGCAGGGTGGATACTTCAGTGTCTTGGGAGGCGTTGATTTGTGTCGGATCGTCCAAGAAGAGAGCGAGGAAGG	CACGGCGTCTGGAATGCAGGATGAGGTCAGAGCGGTTGGCGAGGAGCAAAGGTCAGAGGAGCCAAAGCGCAGGGTGGATACTTCTGTGTCTTGGGAGGCGTTGATTTGTGTCGGATCGTCCAAGAAGAGAGCGAGGAAGG	8	WT	VKSATLSSTESTASGMQDEVRAVGEEQRSEEPKRRVDTSVSWEALICVGSSKKRARKASSSDDEGGPRTLGGDGHRAEEASKDKE	VKSATLSSTESTASGMQDEVRAVGEEQRSEEPKRRVDTSVSWEALICVGSSKKRARKASSSDDEGGPRTLGGDGHRAEEASKDKE
CACGGCGTCTGGAATGCAGGATGAGGTCAGAGCGGTTGGCGAGGAGCAAAGGTCAGAGGAGCCAAAGCGCAGGGTGGATACTTCAGTGTCTTGGGAGGCGTTGATTTGTGTCGGATCGTCCAAGAAGAGAGCGAGGAAGG	CACGGCGTCTGGAATGCAGGATGAGGTCAGAGCGGTTGGCGAGGAGCAAAGGTCAGAGGAGCCAAAGCGCAGGGTGAATACTTCAGTGTCTTGGGAGGCGTTGATTTGTGTCGGATCGTCCAAGAAGAGAGCGAGGAAGG	8	WT	VKSATLSSTESTASGMQDEVRAVGEEQRSEEPKRRVDTSVSWEALICVGSSKKRARKASSSDDEGGPRTLGGDGHRAEEASKDKE	VKSATLSSTESTASGMQDEVRAVGEEQRSEEPKRRVDTSVSWEALICVGSSKKRARKASSSDDEGGPRTLGGDGHRAEEASKDKE
CACGGCGTCTGGAATGCAGGATGAGGTCAGAGCGGTTGGCGAGGAGCAAAGGTCAGAGGAGCCAAAGCGCAGGGTGGATACTTCAGTGTCTTGGGAGGCGTTGATTTGTGTCGGATCGTCCAAGAAGAGAGCGAGGAAGG	CACGGCGTCTGGAATGCAGGATGAGGTCAGAGCGGTTGGCGAGGAGCAAAGGTCAGAGGAGCCAAAGCGCAGGGTGGATACTTCAGTGTCTTGGGATGCGTTGATTTGTGTCGGATCGTCCAAGAAGAGAGCGAGGAAGG	8	WT	VKSATLSSTESTASGMQDEVRAVGEEQRSEEPKRRVDTSVSWEALICVGSSKKRARKASSSDDEGGPRTLGGDGHRAEEASKDKE	VKSATLSSTESTASGMQDEVRAVGEEQRSEEPKRRVDTSVSWEALICVGSSKKRARKASSSDDEGGPRTLGGDGHRAEEASKDKE
CACGGCGTCTGGAATGCAGGATGAGGTCAGAGCGGTTGGCGAGGAGCAAAGGTCAGAGGAGCCAAAGCGCAGGGTGGATACTTCAGTGTCTTGGGAGGCGTTGATTTGTGTCGGATCGTCCAAGAAGAGAGCGAGGAAGG	CACGGCGTCTGGAATGCAGGATGAGGTCAGAGCGTTTGGCGAGGAGCAAAGGTCAGAGGAGCCAAAGCGCAGGGTGGATACTTCAGTGTCTTGGGAGGCGTTGATTTGTGTCGGATCGTCCAAGAAGAGAGCGAGGAAGG	8	WT	VKSATLSSTESTASGMQDEVRAVGEEQRSEEPKRRVDTSVSWEALICVGSSKKRARKASSSDDEGGPRTLGGDGHRAEEASKDKE	VKSATLSSTESTASGMQDEVRAVGEEQRSEEPKRRVDTSVSWEALICVGSSKKRARKASSSDDEGGPRTLGGDGHRAEEASKDKE
CACGGCGTCTGGAATGCAGGATGAGGTCAGAGCGGTTGGCGAGGAGCAAAGGTCAGAGGAGCCAAAGCGCAGGGTGGATACTTCAGTGTCTTGGGAGGCGTTGATTTGTGTCGGATCGTCCAAGAAGAGAGCGAGGAAGG	CACGGCGTCTGGAATGCAGGATGAGGTCAGAGCGGTTGGCGAGGAGCAAAGGTCAGAGGAGCCAAAGCGCAGGGTGGATACTTCAGTGTCTTGGGAGGCGTTGATTTGTGTCGGATCGTCCAAGAAGAGAGCGAGGAAAG	8	WT	VKSATLSSTESTASGMQDEVRAVGEEQRSEEPKRRVDTSVSWEALICVGSSKKRARKASSSDDEGGPRTLGGDGHRAEEASKDKE	VKSATLSSTESTASGMQDEVRAVGEEQRSEEPKRRVDTSVSWEALICVGSSKKRARKASSSDDEGGPRTLGGDGHRAEEASKDKE
CACGGCGTCTGGAATGCAGGATGAGGTCAGAGCGGTTGGCGAGGAGCAAAGGTCAGAGGAGCCAAAGCGCAGGGTGGATACTTCAGTGTCTTGGGAGGCGTTGATTTGTGTCGGATCGTCCAAGAAGAGAGCGAGGAAGG	CACGGCGTCTGGAATGCAGGATGAGGTCAGAGCGGTTGGCGAGGAGCAAAGGTCAGAGGAGCCAAAACGCAGGGTGGATACTTCAGTGTCTTGGGAGGCGTTGATTTGTGTCGGATCGTCCAAGAAGAGAGCGAGGAAGG	8	WT	VKSATLSSTESTASGMQDEVRAVGEEQRSEEPKRRVDTSVSWEALICVGSSKKRARKASSSDDEGGPRTLGGDGHRAEEASKDKE	VKSATLSSTESTASGMQDEVRAVGEEQRSEEPKRRVDTSVSWEALICVGSSKKRARKASSSDDEGGPRTLGGDGHRAEEASKDKE
CACGGCGTCTGGAATGCAGGATGAGGTCAGAGCGGTTGGCGAGGAGCAAAGGTCAGAGGAGCCAAAGCGCAGGGTGGATACTTCAGTGTCTTGGGAGGCGTTGATTTGTGTCGGATCGTCCAAGAAGAGAGCGAGGAAGG	CACGGAGTCTGGAATGCAGGATGAGGTCAGAGCGGTTGGCGAGGAGCAAAGGTCAGAGGAGCCAAAGCGCAGGGTGGATACTTCAGTGTCTTGGGAGGCGTTGATTTGTGTCGGATCGTCCAAGAAGAGAGCGAGGAAGG	8	WT	VKSATLSSTESTASGMQDEVRAVGEEQRSEEPKRRVDTSVSWEALICVGSSKKRARKASSSDDEGGPRTLGGDGHRAEEASKDKE	VKSATLSSTESTASGMQDEVRAVGEEQRSEEPKRRVDTSVSWEALICVGSSKKRARKASSSDDEGGPRTLGGDGHRAEEASKDKE
CACGGCGTCTGGAATGCAGGATGAGGTCAGAGCGGTTGGCGAGGAGCAAAGGTCAGAGGAGCCAAAGCGCAGGGTGGATACTTCAGTGTCTTGGGAGGCGTTGATTTGTGTCGGATCGTCCAAGAAGAGAGCGAGGAAGG	CACGGCGTCTGGAATGCAGGATGAGGTCAGAGCGGTTGGCGATGAGCAAAGGTCAGAGGAGCCAAAGCGCAGGGTGGATACTTCAGTGTCTTGGGAGGCGTTGATTTGTGTCGGATCGTCCAAGAAGAGAGCGAGGAAGG	8	WT	VKSATLSSTESTASGMQDEVRAVGEEQRSEEPKRRVDTSVSWEALICVGSSKKRARKASSSDDEGGPRTLGGDGHRAEEASKDKE	VKSATLSSTESTASGMQDEVRAVGEEQRSEEPKRRVDTSVSWEALICVGSSKKRARKASSSDDEGGPRTLGGDGHRAEEASKDKE
CACGGCGTCTGGAATGCAGGATGAGGTCAGAGCGGTTGGCGAGGAGCAAAGGTCAGAGGAGCCAAAGCGCAGGGTGGATACTTCAGTGTCTTGGGAGGCGTTGATTTGTGTCGGATCGTCCAAGAAGAGAGCGAGGAAGG	CACGGCGTCTGGAATGCAGGATGAGGTCAGAGCGGTTGGCGAGGAGCAAAGGTCAGAGGAGCCAAAGCGCAGGGTGGATACTTCAGTGTCTTGGGTGGCGTTGATTTGTGTCGGATCGTCCAAGAAGAGAGCGAGGAAGG	8	WT	VKSATLSSTESTASGMQDEVRAVGEEQRSEEPKRRVDTSVSWEALICVGSSKKRARKASSSDDEGGPRTLGGDGHRAEEASKDKE	VKSATLSSTESTASGMQDEVRAVGEEQRSEEPKRRVDTSVSWEALICVGSSKKRARKASSSDDEGGPRTLGGDGHRAEEASKDKE
CACGGCGTCTGGAATGCAGGATGAGGTCAGAGCGGTTGGCGAGGAGCAAAGGTCAGAGGAGCCAAAGCGCAGGGTGGATACTTCAGTGTCTTGGGAGGCGTTGATTTGTGTCGGATCGTCCAAGAAGAGAGCGAGGAAGG	CACGGCGTCTGGAATACAGGATGAGGTCAGAGCGGTTGGCGAGGAGCAAAGGTCAGAGGAGCCAAAGCGCAGGGTGGATACTTCAGTGTCTTGGGAGGCGTTGATTTGTGTCGGATCGTCCAAGAAGAGAGCGAGGAAGG	8	WT	VKSATLSSTESTASGMQDEVRAVGEEQRSEEPKRRVDTSVSWEALICVGSSKKRARKASSSDDEGGPRTLGGDGHRAEEASKDKE	VKSATLSSTESTASGMQDEVRAVGEEQRSEEPKRRVDTSVSWEALICVGSSKKRARKASSSDDEGGPRTLGGDGHRAEEASKDKE
CACGGCGTCTGGAATGCAGGATGAGGTCAGAGCGGTTGGCGAGGAGCAAAGGTCAGAGGAGCCAAAGCGCAGGGTGGATACTTCAGTGTCTTGGGAGGCGTTGATTTGTGTCGGATCGTCCAAGAAGAGAGCGAGGAAGG	CACGGCGTCTGGAATGCAGGATGAGGTCAGAGCGGTTGGCGAGGAGCAAAAGTCAGAGGAGCCAAAGCGCAGGGTGGATACTTCAGTGTCTTGGGAGGCGTTGATTTGTGTCGGATCGTCCAAGAAGAGAGCGAGGAAGG	8	WT	VKSATLSSTESTASGMQDEVRAVGEEQRSEEPKRRVDTSVSWEALICVGSSKKRARKASSSDDEGGPRTLGGDGHRAEEASKDKE	VKSATLSSTESTASGMQDEVRAVGEEQRSEEPKRRVDTSVSWEALICVGSSKKRARKASSSDDEGGPRTLGGDGHRAEEASKDKE
CACGGCGTCTGGAATGCAGGATGAGGTCAGAGCGGTTGGCGAGGAGCAAAGGTCAGAGGAGCCAAAGCGCAGGGTGGATACTTCAGTGTCTTGGGAGGCGTTGATTTGTGTCGGATCGTCCAAGAAGAGAGCGAGGAAGG	CACGGCGTCTGGAATGCAGGATGAGGTCAGAGCGGTTGGCGAGGAGCAAAGGTCAGAAGAGCCAAAGCGCAGGGTGGATACTTCAGTGTCTTGGGAGGCGTTGATTTGTGTCGGATCGTCCAAGAAGAGAGCGAGGAAGG	8	WT	VKSATLSSTESTASGMQDEVRAVGEEQRSEEPKRRVDTSVSWEALICVGSSKKRARKASSSDDEGGPRTLGGDGHRAEEASKDKE	VKSATLSSTESTASGMQDEVRAVGEEQRSEEPKRRVDTSVSWEALICVGSSKKRARKASSSDDEGGPRTLGGDGHRAEEASKDKE
CACGGCGTCTGGAATGCAGGATGAGGTCAGAGCGGTTGGCGAGGAGCAAAGGTCAGAGGAGCCAAAGCGCAGGGTGGATACTTCAGTGTCTTGGGAGGCGTTGATTTGTGTCGGATCGTCCAAGAAGAGAGCGAGGAAGG	CACGGCGTCTGGAATGCAGGATGAGGTCAGAGCGGTTGGCGAAGAGCAAAGGTCAGAGGAGCCAAAGCGCAGGGTGGATACTTCAGTGTCTTGGGAGGCGTTGATTTGTGTCGGATCGTCCAAGAAGAGAGCGAGGAAGG	8	WT	VKSATLSSTESTASGMQDEVRAVGEEQRSEEPKRRVDTSVSWEALICVGSSKKRARKASSSDDEGGPRTLGGDGHRAEEASKDKE	VKSATLSSTESTASGMQDEVRAVGEEQRSEEPKRRVDTSVSWEALICVGSSKKRARKASSSDDEGGPRTLGGDGHRAEEASKDKE
CACGGCGTCTGGAATGCAGGATGAGGTCAGAGCGGTTGGCGAGGAGCAAAGGTCAGAGGAGCCAAAGCGCAGGGTGGATACTTCAGTGTCTTGGGAGGCGTTGATTTGTGTCGGATCGTCCAAGAAGAGAGCGAGGAAGG	CACGGCGTCTGGAATGCAGGATGAGGTCAGAGCGGTTGGCGAGGAGCAAAGGTCAGAGTAGCCAAAGCGCAGGGTGGATACTTCAGTGTCTTGGGAGGCGTTGATTTGTGTCGGATCGTCCAAGAAGAGAGCGAGGAAGG	8	WT	VKSATLSSTESTASGMQDEVRAVGEEQRSEEPKRRVDTSVSWEALICVGSSKKRARKASSSDDEGGPRTLGGDGHRAEEASKDKE	VKSATLSSTESTASGMQDEVRAVGEEQRSEEPKRRVDTSVSWEALICVGSSKKRARKASSSDDEGGPRTLGGDGHRAEEASKDKE
CACGGCGTCTGGAATGCAGGATGAGGTCAGAGCGGTTGGCGAGGAGCAAAGGTCAGAGGAGCCAAAGCGCAGGGTGGATACTTCAGTGTCTTGGGAGGCGTTGATTTGTGTCGGATCGTCCAAGAAGAGAGCGAGGAAGG	CACGGCGTCTGGAATGCAGGATGAGGTCAGAGCGGTTGGCGAGGAGCAAAGGTCTGAGGAGCCAAAGCGCAGGGTGGATACTTCAGTGTCTTGGGAGGCGTTGATTTGTGTCGGATCGTCCAAGAAGAGAGCGAGGAAGG	7	WT	VKSATLSSTESTASGMQDEVRAVGEEQRSEEPKRRVDTSVSWEALICVGSSKKRARKASSSDDEGGPRTLGGDGHRAEEASKDKE	VKSATLSSTESTASGMQDEVRAVGEEQRSEEPKRRVDTSVSWEALICVGSSKKRARKASSSDDEGGPRTLGGDGHRAEEASKDKE
CACGGCGTCTGGAATGCAGGATGAGGTCAGAGCGGTTGGCGAGGAGCAAAGGTCAGAGGAGCCAAAGCGCAGGGTGGATACTTCAGTGTCTTGGGAGGCGTTGATTTGTGTCGGATCGTCCAAGAAGAGAGCGAGGAAGG	CACGGCGTCTGGAATGCAGGATGAGGTCAGAGCGGTTGGCGAGGAGCAAAGGTCAGAGGAGCCAAAGCGCAGGGTGGATACTTCAGTTTCTTGGGAGGCGTTGATTTGTGTCGGATCGTCCAAGAAGAGAGCGAGGAAGG	7	WT	VKSATLSSTESTASGMQDEVRAVGEEQRSEEPKRRVDTSVSWEALICVGSSKKRARKASSSDDEGGPRTLGGDGHRAEEASKDKE	VKSATLSSTESTASGMQDEVRAVGEEQRSEEPKRRVDTSVSWEALICVGSSKKRARKASSSDDEGGPRTLGGDGHRAEEASKDKE
CACGGCGTCTGGAATGCAGGATGAGGTCAGAGCGGTTGGCGAGGAGCAAAGGTCAGAGGAGCCAAAGCGCAGGGTGGATACTTCAGTGTCTTGGGAGGCGTTGATTTGTGTCGGATCGTCCAAGAAGAGAGCGAGGAAGG	CACGGCGTCTGGAATGCAGGATGAGGTCAGAGCGGTTGGCGAGGAGCAAAGGTCAGAGGAGCCAAAGCGCAGGGTGGATACTTCATTGTCTTGGGAGGCGTTGATTTGTGTCGGATCGTCCAAGAAGAGAGCGAGGAAGG	7	WT	VKSATLSSTESTASGMQDEVRAVGEEQRSEEPKRRVDTSVSWEALICVGSSKKRARKASSSDDEGGPRTLGGDGHRAEEASKDKE	VKSATLSSTESTASGMQDEVRAVGEEQRSEEPKRRVDTSVSWEALICVGSSKKRARKASSSDDEGGPRTLGGDGHRAEEASKDKE
CACGGCGTCTGGAATGCAGGATGAGGTCAGAGCGGTTGGCGAGGAGCAAAGGTCAGAGGAGCCAAAGCGCAGGGTGGATACTTCAGTGTCTTGGGAGGCGTTGATTTGTGTCGGATCGTCCAAGAAGAGAGCGAGGAAGG	CACGGCGTCTGGAATGCAGGATGAGGTCAGAGCGGTTGGCGAGGAGCAAAGGTCAGAGGAGCCAAAGCGCAGGGTGGATACTTCAGTGTCTTGGGAGGCGTTGATTTGTGTCGGATCGTCCAAGATGAGAGCGAGGAAGG	7	WT	VKSATLSSTESTASGMQDEVRAVGEEQRSEEPKRRVDTSVSWEALICVGSSKKRARKASSSDDEGGPRTLGGDGHRAEEASKDKE	VKSATLSSTESTASGMQDEVRAVGEEQRSEEPKRRVDTSVSWEALICVGSSKKRARKASSSDDEGGPRTLGGDGHRAEEASKDKE
CACGGCGTCTGGAATGCAGGATGAGGTCAGAGCGGTTGGCGAGGAGCAAAGGTCAGAGGAGCCAAAGCGCAGGGTGGATACTTCAGTGTCTTGGGAGGCGTTGATTTGTGTCGGATCGTCCAAGAAGAGAGCGAGGAAGG	CACGGCGTCTGGAATGCAGGATGAGGTCAGAGCGGTTGGCGAGGAGCAAAGGTCAGAGGAGCCAAAGCGCAGGGTGGATACTTCAGTGTCTTGGAAGGCGTTGATTTGTGTCGGATCGTCCAAGAAGAGAGCGAGGAAGG	7	WT	VKSATLSSTESTASGMQDEVRAVGEEQRSEEPKRRVDTSVSWEALICVGSSKKRARKASSSDDEGGPRTLGGDGHRAEEASKDKE	VKSATLSSTESTASGMQDEVRAVGEEQRSEEPKRRVDTSVSWEALICVGSSKKRARKASSSDDEGGPRTLGGDGHRAEEASKDKE
CACGGCGTCTGGAATGCAGGATGAGGTCAGAGCGGTTGGCGAGGAGCAAAGGTCAGAGGAGCCAAAGCGCAGGGTGGATACTTCAGTGTCTTGGGAGGCGTTGATTTGTGTCGGATCGTCCAAGAAGAGAGCGAGGAAGG	CACGGCGTCTGGAATGCAGGATGAGGTCAGTGCGGTTGGCGAGGAGCAAAGGTCAGAGGAGCCAAAGCGCAGGGTGGATACTTCAGTGTCTTGGGAGGCGTTGATTTGTGTCGGATCGTCCAAGAAGAGAGCGAGGAAGG	7	WT	VKSATLSSTESTASGMQDEVRAVGEEQRSEEPKRRVDTSVSWEALICVGSSKKRARKASSSDDEGGPRTLGGDGHRAEEASKDKE	VKSATLSSTESTASGMQDEVRAVGEEQRSEEPKRRVDTSVSWEALICVGSSKKRARKASSSDDEGGPRTLGGDGHRAEEASKDKE
CACGGCGTCTGGAATGCAGGATGAGGTCAGAGCGGTTGGCGAGGAGCAAAGGTCAGAGGAGCCAAAGCGCAGGGTGGATACTTCAGTGTCTTGGGAGGCGTTGATTTGTGTCGGATCGTCCAAGAAGAGAGCGAGGAAGG	CACGGCGTCTGGAATGCAGGATGAGGTCAGAGCGGTGGGCGAGGAGCAAAGGTCAGAGGAGCCAAAGCGCAGGGTGGATACTTCAGTGTCTTGGGAGGCGTTGATTTGTGTCGGATCGTCCAAGAAGAGAGCGAGGAAGG	7	WT	VKSATLSSTESTASGMQDEVRAVGEEQRSEEPKRRVDTSVSWEALICVGSSKKRARKASSSDDEGGPRTLGGDGHRAEEASKDKE	VKSATLSSTESTASGMQDEVRAVGEEQRSEEPKRRVDTSVSWEALICVGSSKKRARKASSSDDEGGPRTLGGDGHRAEEASKDKE
CACGGCGTCTGGAATGCAGGATGAGGTCAGAGCGGTTGGCGAGGAGCAAAGGTCAGAGGAGCCAAAGCGCAGGGTGGATACTTCAGTGTCTTGGGAGGCGTTGATTTGTGTCGGATCGTCCAAGAAGAGAGCGAGGAAGG	CACGGCGTCTGGAATGCAGGATGAGGTCAGAGCGGTTGGCGAGGAGCAAAGGTCAGAGGAGCCAAAGCGCAGGGTGGATACTTCAGTGTCTTGGGAGGCGTTGATTTGTGTCGGAACGTCCAAGAAGAGAGCGAGGAAGG	7	WT	VKSATLSSTESTASGMQDEVRAVGEEQRSEEPKRRVDTSVSWEALICVGSSKKRARKASSSDDEGGPRTLGGDGHRAEEASKDKE	VKSATLSSTESTASGMQDEVRAVGEEQRSEEPKRRVDTSVSWEALICVGSSKKRARKASSSDDEGGPRTLGGDGHRAEEASKDKE
CACGGCGTCTGGAATGCAGGATGAGGTCAGAGCGGTTGGCGAGGAGCAAAGGTCAGAGGAGCCAAAGCGCAGGGTGGATACTTCAGTGTCTTGGGAGGCGTTGATTTGTGTCGGATCGTCCAAGAAGAGAGCGAGGAAGG	CACGGCGTCTGGAATGCAGGATGAGGTCAGAGCGGTTGGCGAGGAGCAAAGGTCAGAGGAGCCAAAGCGTAGGGTGGATACTTCAGTGTCTTGGGAGGCGTTGATTTGTGTCGGATCGTCCAAGAAGAGAGCGAGGAAGG	7	WT	VKSATLSSTESTASGMQDEVRAVGEEQRSEEPKRRVDTSVSWEALICVGSSKKRARKASSSDDEGGPRTLGGDGHRAEEASKDKE	VKSATLSSTESTASGMQDEVRAVGEEQRSEEPKRRVDTSVSWEALICVGSSKKRARKASSSDDEGGPRTLGGDGHRAEEASKDKE
CACGGCGTCTGGAATGCAGGATGAGGTCAGAGCGGTTGGCGAGGAGCAAAGGTCAGAGGAGCCAAAGCGCAGGGTGGATACTTCAGTGTCTTGGGAGGCGTTGATTTGTGTCGGATCGTCCAAGAAGAGAGCGAGGAAGG	CACGGCGTCTGGAATGCAGGATGAGGTCAGAGCGGTTGGCGAGGAGCAAAGGTCAGAGAAGCCAAAGCGCAGGGTGGATACTTCAGTGTCTTGGGAGGCGTTGATTTGTGTCGGATCGTCCAAGAAGAGAGCGAGGAAGG	7	WT	VKSATLSSTESTASGMQDEVRAVGEEQRSEEPKRRVDTSVSWEALICVGSSKKRARKASSSDDEGGPRTLGGDGHRAEEASKDKE	VKSATLSSTESTASGMQDEVRAVGEEQRSEEPKRRVDTSVSWEALICVGSSKKRARKASSSDDEGGPRTLGGDGHRAEEASKDKE
CACGGCGTCTGGAATGCAGGATGAGGTCAGAGCGGTTGGCGAGGAGCAAAGGTCAGAGGAGCCAAAGCGCAGGGTGGATACTTCAGTGTCTTGGGAGGCGTTGATTTGTGTCGGATCGTCCAAGAAGAGAGCGAGGAAGG	CACGGCGTCTGGAATGCAGGATGAGGTCAGAGCGGTTGGCGAGGAGCAAAGGTCAGAGGAGCCAAAGCGCAGGGTGGATACTTCAGTGTTTTGGGAGGCGTTGATTTGTGTCGGATCGTCCAAGAAGAGAGCGAGGAAGG	7	WT	VKSATLSSTESTASGMQDEVRAVGEEQRSEEPKRRVDTSVSWEALICVGSSKKRARKASSSDDEGGPRTLGGDGHRAEEASKDKE	VKSATLSSTESTASGMQDEVRAVGEEQRSEEPKRRVDTSVSWEALICVGSSKKRARKASSSDDEGGPRTLGGDGHRAEEASKDKE
CACGGCGTCTGGAATGCAGGATGAGGTCAGAGCGGTTGGCGAGGAGCAAAGGTCAGAGGAGCCAAAGCGCAGGGTGGATACTTCAGTGTCTTGGGAGGCGTTGATTTGTGTCGGATCGTCCAAGAAGAGAGCGAGGAAGG	CACGGCGTCTGGAATGCAGGATGAGGTCAGAGCGGTTGGCGAGGAGCAAAGGTCAGAGGAGCCAAAGCGCAGGGTGGATACTTCAGTGACTTGGGAGGCGTTGATTTGTGTCGGATCGTCCAAGAAGAGAGCGAGGAAGG	7	WT	VKSATLSSTESTASGMQDEVRAVGEEQRSEEPKRRVDTSVSWEALICVGSSKKRARKASSSDDEGGPRTLGGDGHRAEEASKDKE	VKSATLSSTESTASGMQDEVRAVGEEQRSEEPKRRVDTSVSWEALICVGSSKKRARKASSSDDEGGPRTLGGDGHRAEEASKDKE
CACGGCGTCTGGAATGCAGGATGAGGTCAGAGCGGTTGGCGAGGAGCAAAGGTCAGAGGAGCCAAAGCGCAGGGTGGATACTTCAGTGTCTTGGGAGGCGTTGATTTGTGTCGGATCGTCCAAGAAGAGAGCGAGGAAGG	CACGGCGTCTGGAATGCAGGATGAGGTCAGAGCGGTTGGCGAGGAGCAAAGGTCAGAGGAGCCAAAGCGCAGGGTGGATTCTTCAGTGTCTTGGGAGGCGTTGATTTGTGTCGGATCGTCCAAGAAGAGAGCGAGGAAGG	7	WT	VKSATLSSTESTASGMQDEVRAVGEEQRSEEPKRRVDTSVSWEALICVGSSKKRARKASSSDDEGGPRTLGGDGHRAEEASKDKE	VKSATLSSTESTASGMQDEVRAVGEEQRSEEPKRRVDTSVSWEALICVGSSKKRARKASSSDDEGGPRTLGGDGHRAEEASKDKE
CACGGCGTCTGGAATGCAGGATGAGGTCAGAGCGGTTGGCGAGGAGCAAAGGTCAGAGGAGCCAAAGCGCAGGGTGGATACTTCAGTGTCTTGGGAGGCGTTGATTTGTGTCGGATCGTCCAAGAAGAGAGCGAGGAAGG	CACGGCGTCTGGAATGCAGGATGAGGTCAGAGCGGTTGGCGAGGTGCAAAGGTCAGAGGAGCCAAAGCGCAGGGTGGATACTTCAGTGTCTTGGGAGGCGTTGATTTGTGTCGGATCGTCCAAGAAGAGAGCGAGGAAGG	7	WT	VKSATLSSTESTASGMQDEVRAVGEEQRSEEPKRRVDTSVSWEALICVGSSKKRARKASSSDDEGGPRTLGGDGHRAEEASKDKE	VKSATLSSTESTASGMQDEVRAVGEEQRSEEPKRRVDTSVSWEALICVGSSKKRARKASSSDDEGGPRTLGGDGHRAEEASKDKE
CACGGCGTCTGGAATGCAGGATGAGGTCAGAGCGGTTGGCGAGGAGCAAAGGTCAGAGGAGCCAAAGCGCAGGGTGGATACTTCAGTGTCTTGGGAGGCGTTGATTTGTGTCGGATCGTCCAAGAAGAGAGCGAGGAAGG	CACGGCGTCTGGAATGCAGGATGAGGTCAGAGCGGTTGGCGAGGAGCAAAGGTCAGAGGAGCCAAAGCGCAGGGTGGATACTTCAGTGTCTTGGTAGGCGTTGATTTGTGTCGGATCGTCCAAGAAGAGAGCGAGGAAGG	7	WT	VKSATLSSTESTASGMQDEVRAVGEEQRSEEPKRRVDTSVSWEALICVGSSKKRARKASSSDDEGGPRTLGGDGHRAEEASKDKE	VKSATLSSTESTASGMQDEVRAVGEEQRSEEPKRRVDTSVSWEALICVGSSKKRARKASSSDDEGGPRTLGGDGHRAEEASKDKE
CACGGCGTCTGGAATGCAGGATGAGGTCAGAGCGGTTGGCGAGGAGCAAAGGTCAGAGGAGCCAAAGCGCAGGGTGGATACTTCAGTGTCTTGGGAGGCGTTGATTTGTGTCGGATCGTCCAAGAAGAGAGCGAGGAAGG	CACGGCGTCTGGAATGCAGGATGAGGTCAGAGCGGTTGGCGAGGAGCAAAGGTCAGAGGAGCCAAATCGCAGGGTGGATACTTCAGTGTCTTGGGAGGCGTTGATTTGTGTCGGATCGTCCAAGAAGAGAGCGAGGAAGG	6	WT	VKSATLSSTESTASGMQDEVRAVGEEQRSEEPKRRVDTSVSWEALICVGSSKKRARKASSSDDEGGPRTLGGDGHRAEEASKDKE	VKSATLSSTESTASGMQDEVRAVGEEQRSEEPKRRVDTSVSWEALICVGSSKKRARKASSSDDEGGPRTLGGDGHRAEEASKDKE
CACGGCGTCTGGAATGCAGGATGAGGTCAGAGCGGTTGGCGAGGAGCAAAGGTCAGAGGAGCCAAAGCGCAGGGTGGATACTTCAGTGTCTTGGGAGGCGTTGATTTGTGTCGGATCGTCCAAGAAGAGAGCGAGGAAGG	CACGGCGTCTGGAATGCAGGATGAGGTCAGAGCGGTTGGCGAGGAGCAAAGGTCAGAGGAGCCAAAGCGCAGGGTGGATACTTCAGTGTCTTGGGAGGCGTTGATTTGTGTCGGATCGTCCTAGAAGAGAGCGAGGAAGG	6	WT	VKSATLSSTESTASGMQDEVRAVGEEQRSEEPKRRVDTSVSWEALICVGSSKKRARKASSSDDEGGPRTLGGDGHRAEEASKDKE	VKSATLSSTESTASGMQDEVRAVGEEQRSEEPKRRVDTSVSWEALICVGSSKKRARKASSSDDEGGPRTLGGDGHRAEEASKDKE
CACGGCGTCTGGAATGCAGGATGAGGTCAGAGCGGTTGGCGAGGAGCAAAGGTCAGAGGAGCCAAAGCGCAGGGTGGATACTTCAGTGTCTTGGGAGGCGTTGATTTGTGTCGGATCGTCCAAGAAGAGAGCGAGGAAGG	CACGGCGTCTGGAATGCAGGATGAGGTCAGAGCGGTTGGCGAGGAGCAAAGGTCAGAGGAGCCATAGCGCAGGGTGGATACTTCAGTGTCTTGGGAGGCGTTGATTTGTGTCGGATCGTCCAAGAAGAGAGCGAGGAAGG	6	WT	VKSATLSSTESTASGMQDEVRAVGEEQRSEEPKRRVDTSVSWEALICVGSSKKRARKASSSDDEGGPRTLGGDGHRAEEASKDKE	VKSATLSSTESTASGMQDEVRAVGEEQRSEEPKRRVDTSVSWEALICVGSSKKRARKASSSDDEGGPRTLGGDGHRAEEASKDKE
CACGGCGTCTGGAATGCAGGATGAGGTCAGAGCGGTTGGCGAGGAGCAAAGGTCAGAGGAGCCAAAGCGCAGGGTGGATACTTCAGTGTCTTGGGAGGCGTTGATTTGTGTCGGATCGTCCAAGAAGAGAGCGAGGAAGG	CACGGCGTCTGGAATGCAGGATGAGGTCAGAGCGGTTGGCGAGGAGCAAAGGTCAGAGGAGCCAAAGCGCCGGGTGGATACTTCAGTGTCTTGGGAGGCGTTGATTTGTGTCGGATCGTCCAAGAAGAGAGCGAGGAAGG	6	WT	VKSATLSSTESTASGMQDEVRAVGEEQRSEEPKRRVDTSVSWEALICVGSSKKRARKASSSDDEGGPRTLGGDGHRAEEASKDKE	VKSATLSSTESTASGMQDEVRAVGEEQRSEEPKRRVDTSVSWEALICVGSSKKRARKASSSDDEGGPRTLGGDGHRAEEASKDKE
CACGGCGTCTGGAATGCAGGATGAGGTCAGAGCGGTTGGCGAGGAGCAAAGGTCAGAGGAGCCAAAGCGCAGGGTGGATACTTCAGTGTCTTGGGAGGCGTTGATTTGTGTCGGATCGTCCAAGAAGAGAGCGAGGAAGG	CACGGCGTCTGGAATGCAGGATGAGGTCAGAGCGGTTGGCGAGGAGCAAAGGTCAGAGGAGCCAAAGCGCAGGGTGGATACTTCAGTGTCATGGGAGGCGTTGATTTGTGTCGGATCGTCCAAGAAGAGAGCGAGGAAGG	6	WT	VKSATLSSTESTASGMQDEVRAVGEEQRSEEPKRRVDTSVSWEALICVGSSKKRARKASSSDDEGGPRTLGGDGHRAEEASKDKE	VKSATLSSTESTASGMQDEVRAVGEEQRSEEPKRRVDTSVSWEALICVGSSKKRARKASSSDDEGGPRTLGGDGHRAEEASKDKE
CACGGCGTCTGGAATGCAGGATGAGGTCAGAGCGGTTGGCGAGGAGCAAAGGTCAGAGGAGCCAAAGCGCAGGGTGGATACTTCAGTGTCTTGGGAGGCGTTGATTTGTGTCGGATCGTCCAAGAAGAGAGCGAGGAAGG	CACGGCGTCTGGAATGCAGGATGATGTCAGAGCGGTTGGCGAGGAGCAAAGGTCAGAGGAGCCAAAGCGCAGGGTGGATACTTCAGTGTCTTGGGAGGCGTTGATTTGTGTCGGATCGTCCAAGAAGAGAGCGAGGAAGG	6	WT	VKSATLSSTESTASGMQDEVRAVGEEQRSEEPKRRVDTSVSWEALICVGSSKKRARKASSSDDEGGPRTLGGDGHRAEEASKDKE	VKSATLSSTESTASGMQDEVRAVGEEQRSEEPKRRVDTSVSWEALICVGSSKKRARKASSSDDEGGPRTLGGDGHRAEEASKDKE
CACGGCGTCTGGAATGCAGGATGAGGTCAGAGCGGTTGGCGAGGAGCAAAGGTCAGAGGAGCCAAAGCGCAGGGTGGATACTTCAGTGTCTTGGGAGGCGTTGATTTGTGTCGGATCGTCCAAGAAGAGAGCGAGGAAGG	CACGGCGTCTGGAATGCAGGATGAGGTCAGAGCGGTTGGCGAGGATCAAAGGTCAGAGGAGCCAAAGCGCAGGGTGGATACTTCAGTGTCTTGGGAGGCGTTGATTTGTGTCGGATCGTCCAAGAAGAGAGCGAGGAAGG	6	WT	VKSATLSSTESTASGMQDEVRAVGEEQRSEEPKRRVDTSVSWEALICVGSSKKRARKASSSDDEGGPRTLGGDGHRAEEASKDKE	VKSATLSSTESTASGMQDEVRAVGEEQRSEEPKRRVDTSVSWEALICVGSSKKRARKASSSDDEGGPRTLGGDGHRAEEASKDKE
CACGGCGTCTGGAATGCAGGATGAGGTCAGAGCGGTTGGCGAGGAGCAAAGGTCAGAGGAGCCAAAGCGCAGGGTGGATACTTCAGTGTCTTGGGAGGCGTTGATTTGTGTCGGATCGTCCAAGAAGAGAGCGAGGAAGG	CACGGCGTCTGGAATGCAGGATTAGGTCAGAGCGGTTGGCGAGGAGCAAAGGTCAGAGGAGCCAAAGCGCAGGGTGGATACTTCAGTGTCTTGGGAGGCGTTGATTTGTGTCGGATCGTCCAAGAAGAGAGCGAGGAAGG	6	WT	VKSATLSSTESTASGMQDEVRAVGEEQRSEEPKRRVDTSVSWEALICVGSSKKRARKASSSDDEGGPRTLGGDGHRAEEASKDKE	VKSATLSSTESTASGMQDEVRAVGEEQRSEEPKRRVDTSVSWEALICVGSSKKRARKASSSDDEGGPRTLGGDGHRAEEASKDKE
CACGGCGTCTGGAATGCAGGATGAGGTCAGAGCGGTTGGCGAGGAGCAAAGGTCAGAGGAGCCAAAGCGCAGGGTGGATACTTCAGTGTCTTGGGAGGCGTTGATTTGTGTCGGATCGTCCAAGAAGAGAGCGAGGAAGG	CACGGCGTCTGGAATGCAGGATGAGGTCAGAGCGGTTGGCGAGGAGCAAAGGTCAGAGGAGCCAAAGCGCAGGGTGGATACTTCAGTGTCTTGGGAGGCGTTGATTTGTGTCGGATCGTCCAAGAAGAGAGCTAGGAAGG	6	WT	VKSATLSSTESTASGMQDEVRAVGEEQRSEEPKRRVDTSVSWEALICVGSSKKRARKASSSDDEGGPRTLGGDGHRAEEASKDKE	VKSATLSSTESTASGMQDEVRAVGEEQRSEEPKRRVDTSVSWEALICVGSSKKRARKASSSDDEGGPRTLGGDGHRAEEASKDKE
CACGGCGTCTGGAATGCAGGATGAGGTCAGAGCGGTTGGCGAGGAGCAAAGGTCAGAGGAGCCAAAGCGCAGGGTGGATACTTCAGTGTCTTGGGAGGCGTTGATTTGTGTCGGATCGTCCAAGAAGAGAGCGAGGAAGG	CACGGCGTCTGGAATGCAGGATGAGGTCAGAGCGGTTGGCGAGGAGCAAAGGTCAGAGGAGCCAAAGCGCAGGGTGGATACTTCAGTGTCTTGGGAGGCGTTGATTTGTGTCGAATCGTCCAAGAAGAGAGCGAGGAAGG	6	WT	VKSATLSSTESTASGMQDEVRAVGEEQRSEEPKRRVDTSVSWEALICVGSSKKRARKASSSDDEGGPRTLGGDGHRAEEASKDKE	VKSATLSSTESTASGMQDEVRAVGEEQRSEEPKRRVDTSVSWEALICVGSSKKRARKASSSDDEGGPRTLGGDGHRAEEASKDKE
CACGGCGTCTGGAATGCAGGATGAGGTCAGAGCGGTTGGCGAGGAGCAAAGGTCAGAGGAGCCAAAGCGCAGGGTGGATACTTCAGTGTCTTGGGAGGCGTTGATTTGTGTCGGATCGTCCAAGAAGAGAGCGAGGAAGG	CACGGCGTCTGGAATGCAGGATGAGGTCAGAGCGGTTGGCGAGGAGCAAAGGTCAGAGGAGCCAAAGCGCAGGGTGGATACTTCAGTGTCTTGGGAGGCGTTGATTTGTGTCGGATCGTCCAAGACGAGAGCGAGGAAGG	6	WT	VKSATLSSTESTASGMQDEVRAVGEEQRSEEPKRRVDTSVSWEALICVGSSKKRARKASSSDDEGGPRTLGGDGHRAEEASKDKE	VKSATLSSTESTASGMQDEVRAVGEEQRSEEPKRRVDTSVSWEALICVGSSKKRARKASSSDDEGGPRTLGGDGHRAEEASKDKE
CACGGCGTCTGGAATGCAGGATGAGGTCAGAGCGGTTGGCGAGGAGCAAAGGTCAGAGGAGCCAAAGCGCAGGGTGGATACTTCAGTGTCTTGGGAGGCGTTGATTTGTGTCGGATCGTCCAAGAAGAGAGCGAGGAAGG	CACGGCGTCTGGAATGCAGGATGAGGTCAGCGCGGTTGGCGAGGAGCAAAGGTCAGAGGAGCCAAAGCGCAGGGTGGATACTTCAGTGTCTTGGGAGGCGTTGATTTGTGTCGGATCGTCCAAGAAGAGAGCGAGGAAGG	6	WT	VKSATLSSTESTASGMQDEVRAVGEEQRSEEPKRRVDTSVSWEALICVGSSKKRARKASSSDDEGGPRTLGGDGHRAEEASKDKE	VKSATLSSTESTASGMQDEVRAVGEEQRSEEPKRRVDTSVSWEALICVGSSKKRARKASSSDDEGGPRTLGGDGHRAEEASKDKE
CACGGCGTCTGGAATGCAGGATGAGGTCAGAGCGGTTGGCGAGGAGCAAAGGTCAGAGGAGCCAAAGCGCAGGGTGGATACTTCAGTGTCTTGGGAGGCGTTGATTTGTGTCGGATCGTCCAAGAAGAGAGCGAGGAAGG	CACGGCGTCTGGAATGCAGGATGAGGTCAGAGCGGTTGTCGAGGAGCAAAGGTCAGAGGAGCCAAAGCGCAGGGTGGATACTTCAGTGTCTTGGGAGGCGTTGATTTGTGTCGGATCGTCCAAGAAGAGAGCGAGGAAGG	6	WT	VKSATLSSTESTASGMQDEVRAVGEEQRSEEPKRRVDTSVSWEALICVGSSKKRARKASSSDDEGGPRTLGGDGHRAEEASKDKE	VKSATLSSTESTASGMQDEVRAVGEEQRSEEPKRRVDTSVSWEALICVGSSKKRARKASSSDDEGGPRTLGGDGHRAEEASKDKE
CACGGCGTCTGGAATGCAGGATGAGGTCAGAGCGGTTGGCGAGGAGCAAAGGTCAGAGGAGCCAAAGCGCAGGGTGGATACTTCAGTGTCTTGGGAGGCGTTGATTTGTGTCGGATCGTCCAAGAAGAGAGCGAGGAAGG	CACGGCGTCTGGAATGCAGGATGAGGTCAGAGCGGTTGGCGAGGAGCAAAGGTCAGAGGAGCCAAAGCGCAGGGTGGATACTTCAGTGTCTTGGGAGGCGTTGATTTGTGTCGGATCGTTCAAGAAGAGAGCGAGGAAGG	6	WT	VKSATLSSTESTASGMQDEVRAVGEEQRSEEPKRRVDTSVSWEALICVGSSKKRARKASSSDDEGGPRTLGGDGHRAEEASKDKE	VKSATLSSTESTASGMQDEVRAVGEEQRSEEPKRRVDTSVSWEALICVGSSKKRARKASSSDDEGGPRTLGGDGHRAEEASKDKE
CACGGCGTCTGGAATGCAGGATGAGGTCAGAGCGGTTGGCGAGGAGCAAAGGTCAGAGGAGCCAAAGCGCAGGGTGGATACTTCAGTGTCTTGGGAGGCGTTGATTTGTGTCGGATCGTCCAAGAAGAGAGCGAGGAAGG	CACGGCGTCTGGAATGCAGGATGAGGTCAGAGCGGTTGGCGAGGAGCAACGGTCAGAGGAGCCAAAGCGCAGGGTGGATACTTCAGTGTCTTGGGAGGCGTTGATTTGTGTCGGATCGTCCAAGAAGAGAGCGAGGAAGG	6	WT	VKSATLSSTESTASGMQDEVRAVGEEQRSEEPKRRVDTSVSWEALICVGSSKKRARKASSSDDEGGPRTLGGDGHRAEEASKDKE	VKSATLSSTESTASGMQDEVRAVGEEQRSEEPKRRVDTSVSWEALICVGSSKKRARKASSSDDEGGPRTLGGDGHRAEEASKDKE
CACGGCGTCTGGAATGCAGGATGAGGTCAGAGCGGTTGGCGAGGAGCAAAGGTCAGAGGAGCCAAAGCGCAGGGTGGATACTTCAGTGTCTTGGGAGGCGTTGATTTGTGTCGGATCGTCCAAGAAGAGAGCGAGGAAGG	CACGGCGTCTGGATTGCAGGATGAGGTCAGAGCGGTTGGCGAGGAGCAAAGGTCAGAGGAGCCAAAGCGCAGGGTGGATACTTCAGTGTCTTGGGAGGCGTTGATTTGTGTCGGATCGTCCAAGAAGAGAGCGAGGAAGG	6	WT	VKSATLSSTESTASGMQDEVRAVGEEQRSEEPKRRVDTSVSWEALICVGSSKKRARKASSSDDEGGPRTLGGDGHRAEEASKDKE	VKSATLSSTESTASGMQDEVRAVGEEQRSEEPKRRVDTSVSWEALICVGSSKKRARKASSSDDEGGPRTLGGDGHRAEEASKDKE
CACGGCGTCTGGAATGCAGGATGAGGTCAGAGCGGTTGGCGAGGAGCAAAGGTCAGAGGAGCCAAAGCGCAGGGTGGATACTTCAGTGTCTTGGGAGGCGTTGATTTGTGTCGGATCGTCCAAGAAGAGAGCGAGGAAGG	CACGGCGTCTGGAATGCAGGATGAGGTCAGAGCGGTTGGAGAGGAGCAAAGGTCAGAGGAGCCAAAGCGCAGGGTGGATACTTCAGTGTCTTGGGAGGCGTTGATTTGTGTCGGATCGTCCAAGAAGAGAGCGAGGAAGG	6	WT	VKSATLSSTESTASGMQDEVRAVGEEQRSEEPKRRVDTSVSWEALICVGSSKKRARKASSSDDEGGPRTLGGDGHRAEEASKDKE	VKSATLSSTESTASGMQDEVRAVGEEQRSEEPKRRVDTSVSWEALICVGSSKKRARKASSSDDEGGPRTLGGDGHRAEEASKDKE
CACGGCGTCTGGAATGCAGGATGAGGTCAGAGCGGTTGGCGAGGAGCAAAGGTCAGAGGAGCCAAAGCGCAGGGTGGATACTTCAGTGTCTTGGGAGGCGTTGATTTGTGTCGGATCGTCCAAGAAGAGAGCGAGGAAGG	CACGGCGTCTGGAATGCAGGATGAGGTCAGAGCGGTTGGCGAGGAGCAATGGTCAGAGGAGCCAAAGCGCAGGGTGGATACTTCAGTGTCTTGGGAGGCGTTGATTTGTGTCGGATCGTCCAAGAAGAGAGCGAGGAAGG	6	WT	VKSATLSSTESTASGMQDEVRAVGEEQRSEEPKRRVDTSVSWEALICVGSSKKRARKASSSDDEGGPRTLGGDGHRAEEASKDKE	VKSATLSSTESTASGMQDEVRAVGEEQRSEEPKRRVDTSVSWEALICVGSSKKRARKASSSDDEGGPRTLGGDGHRAEEASKDKE
CACGGCGTCTGGAATGCAGGATGAGGTCAGAGCGGTTGGCGAGGAGCAAAGGTCAGAGGAGCCAAAGCGCAGGGTGGATACTTCAGTGTCTTGGGAGGCGTTGATTTGTGTCGGATCGTCCAAGAAGAGAGCGAGGAAGG	CACGGCGTCTGGAATGCAGGATGAGGTCAGAGCGGTTGGCGAGGAGCAAAGGTCAAAGGAGCCAAAGCGCAGGGTGGATACTTCAGTGTCTTGGGAGGCGTTGATTTGTGTCGGATCGTCCAAGAAGAGAGCGAGGAAGG	6	WT	VKSATLSSTESTASGMQDEVRAVGEEQRSEEPKRRVDTSVSWEALICVGSSKKRARKASSSDDEGGPRTLGGDGHRAEEASKDKE	VKSATLSSTESTASGMQDEVRAVGEEQRSEEPKRRVDTSVSWEALICVGSSKKRARKASSSDDEGGPRTLGGDGHRAEEASKDKE
CACGGCGTCTGGAATGCAGGATGAGGTCAGAGCGGTTGGCGAGGAGCAAAGGTCAGAGGAGCCAAAGCGCAGGGTGGATACTTCAGTGTCTTGGGAGGCGTTGATTTGTGTCGGATCGTCCAAGAAGAGAGCGAGGAAGG	CACGGCGTCTGGAATGCAGGATGAGGTCAGAGCGGTTGGCGAGGAGCAAAGGTCAGAGGAGCCAAAGCGCAGGGTGGATACTTCAGTGTCTTGGGAGGCGTTGATTTGTGTCGGATCGTCCAAGAAGAGAGCGAAGAAGG	6	WT	VKSATLSSTESTASGMQDEVRAVGEEQRSEEPKRRVDTSVSWEALICVGSSKKRARKASSSDDEGGPRTLGGDGHRAEEASKDKE	VKSATLSSTESTASGMQDEVRAVGEEQRSEEPKRRVDTSVSWEALICVGSSKKRARKASSSDDEGGPRTLGGDGHRAEEASKDKE
CACGGCGTCTGGAATGCAGGATGAGGTCAGAGCGGTTGGCGAGGAGCAAAGGTCAGAGGAGCCAAAGCGCAGGGTGGATACTTCAGTGTCTTGGGAGGCGTTGATTTGTGTCGGATCGTCCAAGAAGAGAGCGAGGAAGG	CACGGCGTCTGGAATGCAGGATGAGGTCAGAGCGGTTGGCGAGGAGCAAAGGTCAGAGGAGCCAAAGCGCAGGGTGGATACTTCAGTGTCTTGGGAGGCGTTGATTTGTGTCGGATCGTCCAAGCAGAGAGCGAGGAAGG	6	WT	VKSATLSSTESTASGMQDEVRAVGEEQRSEEPKRRVDTSVSWEALICVGSSKKRARKASSSDDEGGPRTLGGDGHRAEEASKDKE	VKSATLSSTESTASGMQDEVRAVGEEQRSEEPKRRVDTSVSWEALICVGSSKKRARKASSSDDEGGPRTLGGDGHRAEEASKDKE
CACGGCGTCTGGAATGCAGGATGAGGTCAGAGCGGTTGGCGAGGAGCAAAGGTCAGAGGAGCCAAAGCGCAGGGTGGATACTTCAGTGTCTTGGGAGGCGTTGATTTGTGTCGGATCGTCCAAGAAGAGAGCGAGGAAGG	CACGGCGTCTGGAATGCAGGATGAGGTCAGAGCGGTTGGCGAGGAGCAAAGGTCAGAGGAGCCAAAGCGCAGGGTGGATACTTCAGTGTCGTGGGAGGCGTTGATTTGTGTCGGATCGTCCAAGAAGAGAGCGAGGAAGG	6	WT	VKSATLSSTESTASGMQDEVRAVGEEQRSEEPKRRVDTSVSWEALICVGSSKKRARKASSSDDEGGPRTLGGDGHRAEEASKDKE	VKSATLSSTESTASGMQDEVRAVGEEQRSEEPKRRVDTSVSWEALICVGSSKKRARKASSSDDEGGPRTLGGDGHRAEEASKDKE
CACGGCGTCTGGAATGCAGGATGAGGTCAGAGCGGTTGGCGAGGAGCAAAGGTCAGAGGAGCCAAAGCGCAGGGTGGATACTTCAGTGTCTTGGGAGGCGTTGATTTGTGTCGGATCGTCCAAGAAGAGAGCGAGGAAGG	CACGGCGTCTGGAATGCAGGATGAGGTCAGAGCGGTTGGCGAGGAGCAAAGGTCAGAGGAGCCAAAGCGCAGGGTGGATACTACAGTGTCTTGGGAGGCGTTGATTTGTGTCGGATCGTCCAAGAAGAGAGCGAGGAAGG	6	WT	VKSATLSSTESTASGMQDEVRAVGEEQRSEEPKRRVDTSVSWEALICVGSSKKRARKASSSDDEGGPRTLGGDGHRAEEASKDKE	VKSATLSSTESTASGMQDEVRAVGEEQRSEEPKRRVDTSVSWEALICVGSSKKRARKASSSDDEGGPRTLGGDGHRAEEASKDKE
CACGGCGTCTGGAATGCAGGATGAGGTCAGAGCGGTTGGCGAGGAGCAAAGGTCAGAGGAGCCAAAGCGCAGGGTGGATACTTCAGTGTCTTGGGAGGCGTTGATTTGTGTCGGATCGTCCAAGAAGAGAGCGAGGAAGG	CACGGCGTCTGGAATGCAGGATGAGGTCAGAGCGGTTGGCGAGGAGCAAAGGTCAGAGGAGCCAAAGCGCAGGGTGGATACTTCAGTGTCTTGGGAGGCGTTGTTTTGTGTCGGATCGTCCAAGAAGAGAGCGAGGAAGG	6	WT	VKSATLSSTESTASGMQDEVRAVGEEQRSEEPKRRVDTSVSWEALICVGSSKKRARKASSSDDEGGPRTLGGDGHRAEEASKDKE	VKSATLSSTESTASGMQDEVRAVGEEQRSEEPKRRVDTSVSWEALICVGSSKKRARKASSSDDEGGPRTLGGDGHRAEEASKDKE
CACGGCGTCTGGAATGCAGGATGAGGTCAGAGCGGTTGGCGAGGAGCAAAGGTCAGAGGAGCCAAAGCGCAGGGTGGATACTTCAGTGTCTTGGGAGGCGTTGATTTGTGTCGGATCGTCCAAGAAGAGAGCGAGGAAGG	CACGGCGTCTGGAATGCAGGATGAGGTCAGAGCGGTTGGCGAGGAGCAAAGGTCAGAGGAGCCAAAGCGCAGGGTGGATACTTCAGTGTCTTGGGAGTCGTTGATTTGTGTCGGATCGTCCAAGAAGAGAGCGAGGAAGG	6	WT	VKSATLSSTESTASGMQDEVRAVGEEQRSEEPKRRVDTSVSWEALICVGSSKKRARKASSSDDEGGPRTLGGDGHRAEEASKDKE	VKSATLSSTESTASGMQDEVRAVGEEQRSEEPKRRVDTSVSWEALICVGSSKKRARKASSSDDEGGPRTLGGDGHRAEEASKDKE
CACGGCGTCTGGAATGCAGGATGAGGTCAGAGCGGTTGGCGAGGAGCAAAGGTCAGAGGAGCCAAAGCGCAGGGTGGATACTTCAGTGTCTTGGGAGGCGTTGATTTGTGTCGGATCGTCCAAGAAGAGAGCGAGGAAGG	CACGGCGTCTGGAATGCAGGATGAGGTCAGAGCGGTTGGCGAGGAGCAAAGGTCAGAGGAGCCAAAGCGCAGGGTGGATACTTCAGTGTCTTGGGAGGCGTTGATTTGTGTCGGATCGTACAAGAAGAGAGCGAGGAAGG	6	WT	VKSATLSSTESTASGMQDEVRAVGEEQRSEEPKRRVDTSVSWEALICVGSSKKRARKASSSDDEGGPRTLGGDGHRAEEASKDKE	VKSATLSSTESTASGMQDEVRAVGEEQRSEEPKRRVDTSVSWEALICVGSSKKRARKASSSDDEGGPRTLGGDGHRAEEASKDKE
CACGGCGTCTGGAATGCAGGATGAGGTCAGAGCGGTTGGCGAGGAGCAAAGGTCAGAGGAGCCAAAGCGCAGGGTGGATACTTCAGTGTCTTGGGAGGCGTTGATTTGTGTCGGATCGTCCAAGAAGAGAGCGAGGAAGG	CACGGCTTCTGGAATGCAGGATGAGGTCAGAGCGGTTGGCGAGGAGCAAAGGTCAGAGGAGCCAAAGCGCAGGGTGGATACTTCAGTGTCTTGGGAGGCGTTGATTTGTGTCGGATCGTCCAAGAAGAGAGCGAGGAAGG	6	WT	VKSATLSSTESTASGMQDEVRAVGEEQRSEEPKRRVDTSVSWEALICVGSSKKRARKASSSDDEGGPRTLGGDGHRAEEASKDKE	VKSATLSSTESTASGMQDEVRAVGEEQRSEEPKRRVDTSVSWEALICVGSSKKRARKASSSDDEGGPRTLGGDGHRAEEASKDKE
CACGGCGTCTGGAATGCAGGATGAGGTCAGAGCGGTTGGCGAGGAGCAAAGGTCAGAGGAGCCAAAGCGCAGGGTGGATACTTCAGTGTCTTGGGAGGCGTTGATTTGTGTCGGATCGTCCAAGAAGAGAGCGAGGAAGG	CACGGCGTCTGGAATGCAGGATGAGGTCAGAGCGGTTGGCGAGGAGCAAAGGTCAGAGGAGCCAAAGCGCAGGGTGGATACTTCAGTGTCTTGGGAGGCGTTGAATTGTGTCGGATCGTCCAAGAAGAGAGCGAGGAAGG	6	WT	VKSATLSSTESTASGMQDEVRAVGEEQRSEEPKRRVDTSVSWEALICVGSSKKRARKASSSDDEGGPRTLGGDGHRAEEASKDKE	VKSATLSSTESTASGMQDEVRAVGEEQRSEEPKRRVDTSVSWEALICVGSSKKRARKASSSDDEGGPRTLGGDGHRAEEASKDKE
CACGGCGTCTGGAATGCAGGATGAGGTCAGAGCGGTTGGCGAGGAGCAAAGGTCAGAGGAGCCAAAGCGCAGGGTGGATACTTCAGTGTCTTGGGAGGCGTTGATTTGTGTCGGATCGTCCAAGAAGAGAGCGAGGAAGG	CACGGCGTCTGGAATGCAGGATGAGGTCAGAGCGGTTGGCGAGGAGCAAAGGTCAGAGGAGCCAAAGCGCAGGGTGGATACTTCAGTGTCTTGGGAGGCGTTGATTTGTGTCGGATCGTCCAAGTAGAGAGCGAGGAAGG	6	WT	VKSATLSSTESTASGMQDEVRAVGEEQRSEEPKRRVDTSVSWEALICVGSSKKRARKASSSDDEGGPRTLGGDGHRAEEASKDKE	VKSATLSSTESTASGMQDEVRAVGEEQRSEEPKRRVDTSVSWEALICVGSSKKRARKASSSDDEGGPRTLGGDGHRAEEASKDKE
CACGGCGTCTGGAATGCAGGATGAGGTCAGAGCGGTTGGCGAGGAGCAAAGGTCAGAGGAGCCAAAGCGCAGGGTGGATACTTCAGTGTCTTGGGAGGCGTTGATTTGTGTCGGATCGTCCAAGAAGAGAGCGAGGAAGG	CACGGCGTCTGGAATGCAGGATGAGGTCAGAGCGGTTGGCGAGGAGCAAAGGTCAGAGGAGCCAAAGCGCAGGGTGGATACTTCAGTGTCTTGGGAGGCGTTGATTTGTGTCGGATCGTCCAAGAAGAGAGTGAGGAAGG	6	WT	VKSATLSSTESTASGMQDEVRAVGEEQRSEEPKRRVDTSVSWEALICVGSSKKRARKASSSDDEGGPRTLGGDGHRAEEASKDKE	VKSATLSSTESTASGMQDEVRAVGEEQRSEEPKRRVDTSVSWEALICVGSSKKRARKASSSDDEGGPRTLGGDGHRAEEASKDKE
CACGGCGTCTGGAATGCAGGATGAGGTCAGAGCGGTTGGCGAGGAGCAAAGGTCAGAGGAGCCAAAGCGCAGGGTGGATACTTCAGTGTCTTGGGAGGCGTTGATTTGTGTCGGATCGTCCAAGAAGAGAGCGAGGAAGG	CACGGCGTCTGGAATGCAGGATGAGGTCAGAGCGGTTGGCGAGGAGCAAAGGTCAGAGGAGCCAAAGCGCAGGGTGGA------------------------------------------CAAGAAGAGAGCGAGGAAGG	6	WT	VKSATLSSTESTASGMQDEVRAVGEEQRSEEPKRRVDTSVSWEALICVGSSKKRARKASSSDDEGGPRTLGGDGHRAEEASKDKE	VKSATLSSTESTASGMQDEVRAVGEEQRSEEPKRRVDTSVSWEALICVGSSKKRARKASSSDDEGGPRTLGGDGHRAEEASKDKE
CACGGCGTCTGGAATGCAGGATGAGGTCAGAGCGGTTGGCGAGGAGCAAAGGTCAGAGGAGCCAAAGCGCAGGGTGGATACTTCAGTGTCTTGGGAGGCGTTGATTTGTGTCGGATCGTCCAAGAAGAGAGCGAGGAAGG	CACGGCGTCTGGAATGCAGGATGAGGTCAGAGCGGTTGGCGAGGAGCAAAGGTCAGAGGAGCCAAAGCGCAGGGTGGATACTTCAGTGTCTTGGGAGGCGTTGATTTGTGTCGGATCGTCCAAGAAGATAGCGAGGAAGG	5	WT	VKSATLSSTESTASGMQDEVRAVGEEQRSEEPKRRVDTSVSWEALICVGSSKKRARKASSSDDEGGPRTLGGDGHRAEEASKDKE	VKSATLSSTESTASGMQDEVRAVGEEQRSEEPKRRVDTSVSWEALICVGSSKKRARKASSSDDEGGPRTLGGDGHRAEEASKDKE
CACGGCGTCTGGAATGCAGGATGAGGTCAGAGCGGTTGGCGAGGAGCAAAGGTCAGAGGAGCCAAAGCGCAGGGTGGATACTTCAGTGTCTTGGGAGGCGTTGATTTGTGTCGGATCGTCCAAGAAGAGAGCGAGGAAGG	CCCGGCGTCTGGAATGCAGGATGAGGTCAGAGCGGTTGGCGAGGAGCAAAGGTCAGAGGAGCCAAAGCGCAGGGTGGATACTTCAGTGTCTTGGGAGGCGTTGATTTGTGTCGGATCGTCCAAGAAGAGAGCGAGGAAGG	5	WT	VKSATLSSTESTASGMQDEVRAVGEEQRSEEPKRRVDTSVSWEALICVGSSKKRARKASSSDDEGGPRTLGGDGHRAEEASKDKE	VKSATLSSTESTASGMQDEVRAVGEEQRSEEPKRRVDTSVSWEALICVGSSKKRARKASSSDDEGGPRTLGGDGHRAEEASKDKE
CACGGCGTCTGGAATGCAGGATGAGGTCAGAGCGGTTGGCGAGGAGCAAAGGTCAGAGGAGCCAAAGCGCAGGGTGGATACTTCAGTGTCTTGGGAGGCGTTGATTTGTGTCGGATCGTCCAAGAAGAGAGCGAGGAAGG	CACGGCGTCTGGAATGCAGGATGAGGTCAGAGCGGTTGGCGAGGAGCAAAGGTCAGAGGAGCCAAAGCGCAGGGTGGATACTTCAGTGTCTTGGGAGGCGTTGATTTGTGTCGGATCGTCCAAGAAGAGAGCGAGTAAGG	5	WT	VKSATLSSTESTASGMQDEVRAVGEEQRSEEPKRRVDTSVSWEALICVGSSKKRARKASSSDDEGGPRTLGGDGHRAEEASKDKE	VKSATLSSTESTASGMQDEVRAVGEEQRSEEPKRRVDTSVSWEALICVGSSKKRARKASSSDDEGGPRTLGGDGHRAEEASKDKE
CACGGCGTCTGGAATGCAGGATGAGGTCAGAGCGGTTGGCGAGGAGCAAAGGTCAGAGGAGCCAAAGCGCAGGGTGGATACTTCAGTGTCTTGGGAGGCGTTGATTTGTGTCGGATCGTCCAAGAAGAGAGCGAGGAAGG	CACGGCGTCTGGAATGCAGGATGAGGTCAGAGCGGTTGGCGAGGAGCAAAGGTCAGAGGAGCCAAAGCGCAGGGTGGATACTTCAGTGTCTTTGGAGGCGTTGATTTGTGTCGGATCGTCCAAGAAGAGAGCGAGGAAGG	5	WT	VKSATLSSTESTASGMQDEVRAVGEEQRSEEPKRRVDTSVSWEALICVGSSKKRARKASSSDDEGGPRTLGGDGHRAEEASKDKE	VKSATLSSTESTASGMQDEVRAVGEEQRSEEPKRRVDTSVSWEALICVGSSKKRARKASSSDDEGGPRTLGGDGHRAEEASKDKE
CACGGCGTCTGGAATGCAGGATGAGGTCAGAGCGGTTGGCGAGGAGCAAAGGTCAGAGGAGCCAAAGCGCAGGGTGGATACTTCAGTGTCTTGGGAGGCGTTGATTTGTGTCGGATCGTCCAAGAAGAGAGCGAGGAAGG	CACGGCGTCTGGAATGCAGGATGAGGTCAGAGCGGTTGGCGAGGAGCAAAGGTCAGAGGAGCCAAAGCTCAGGGTGGATACTTCAGTGTCTTGGGAGGCGTTGATTTGTGTCGGATCGTCCAAGAAGAGAGCGAGGAAGG	5	WT	VKSATLSSTESTASGMQDEVRAVGEEQRSEEPKRRVDTSVSWEALICVGSSKKRARKASSSDDEGGPRTLGGDGHRAEEASKDKE	VKSATLSSTESTASGMQDEVRAVGEEQRSEEPKRRVDTSVSWEALICVGSSKKRARKASSSDDEGGPRTLGGDGHRAEEASKDKE
CACGGCGTCTGGAATGCAGGATGAGGTCAGAGCGGTTGGCGAGGAGCAAAGGTCAGAGGAGCCAAAGCGCAGGGTGGATACTTCAGTGTCTTGGGAGGCGTTGATTTGTGTCGGATCGTCCAAGAAGAGAGCGAGGAAGG	CACGGCGTCTGGAATGCAGGATGAGGTCAGAGCGGTAGGCGAGGAGCAAAGGTCAGAGGAGCCAAAGCGCAGGGTGGATACTTCAGTGTCTTGGGAGGCGTTGATTTGTGTCGGATCGTCCAAGAAGAGAGCGAGGAAGG	5	WT	VKSATLSSTESTASGMQDEVRAVGEEQRSEEPKRRVDTSVSWEALICVGSSKKRARKASSSDDEGGPRTLGGDGHRAEEASKDKE	VKSATLSSTESTASGMQDEVRAVGEEQRSEEPKRRVDTSVSWEALICVGSSKKRARKASSSDDEGGPRTLGGDGHRAEEASKDKE
CACGGCGTCTGGAATGCAGGATGAGGTCAGAGCGGTTGGCGAGGAGCAAAGGTCAGAGGAGCCAAAGCGCAGGGTGGATACTTCAGTGTCTTGGGAGGCGTTGATTTGTGTCGGATCGTCCAAGAAGAGAGCGAGGAAGG	CACGTCGTCTGGAATGCAGGATGAGGTCAGAGCGGTTGGCGAGGAGCAAAGGTCAGAGGAGCCAAAGCGCAGGGTGGATACTTCAGTGTCTTGGGAGGCGTTGATTTGTGTCGGATCGTCCAAGAAGAGAGCGAGGAAGG	5	WT	VKSATLSSTESTASGMQDEVRAVGEEQRSEEPKRRVDTSVSWEALICVGSSKKRARKASSSDDEGGPRTLGGDGHRAEEASKDKE	VKSATLSSTESTASGMQDEVRAVGEEQRSEEPKRRVDTSVSWEALICVGSSKKRARKASSSDDEGGPRTLGGDGHRAEEASKDKE
CACGGCGTCTGGAATGCAGGATGAGGTCAGAGCGGTTGGCGAGGAGCAAAGGTCAGAGGAGCCAAAGCGCAGGGTGGATACTTCAGTGTCTTGGGAGGCGTTGATTTGTGTCGGATCGTCCAAGAAGAGAGCGAGGAAGG	CACGGCGTCTGGAATGCAGGATGAGGTCAGAGCGGTTGGCGAGGAGCAAAGGTCAGAGGAGCCAAAGCCCAGGGTGGATACTTCAGTGTCTTGGGAGGCGTTGATTTGTGTCGGATCGTCCAAGAAGAGAGCGAGGAAGG	5	WT	VKSATLSSTESTASGMQDEVRAVGEEQRSEEPKRRVDTSVSWEALICVGSSKKRARKASSSDDEGGPRTLGGDGHRAEEASKDKE	VKSATLSSTESTASGMQDEVRAVGEEQRSEEPKRRVDTSVSWEALICVGSSKKRARKASSSDDEGGPRTLGGDGHRAEEASKDKE
CACGGCGTCTGGAATGCAGGATGAGGTCAGAGCGGTTGGCGAGGAGCAAAGGTCAGAGGAGCCAAAGCGCAGGGTGGATACTTCAGTGTCTTGGGAGGCGTTGATTTGTGTCGGATCGTCCAAGAAGAGAGCGAGGAAGG	CACTGCGTCTGGAATGCAGGATGAGGTCAGAGCGGTTGGCGAGGAGCAAAGGTCAGAGGAGCCAAAGCGCAGGGTGGATACTTCAGTGTCTTGGGAGGCGTTGATTTGTGTCGGATCGTCCAAGAAGAGAGCGAGGAAGG	5	WT	VKSATLSSTESTASGMQDEVRAVGEEQRSEEPKRRVDTSVSWEALICVGSSKKRARKASSSDDEGGPRTLGGDGHRAEEASKDKE	VKSATLSSTESTASGMQDEVRAVGEEQRSEEPKRRVDTSVSWEALICVGSSKKRARKASSSDDEGGPRTLGGDGHRAEEASKDKE
CACGGCGTCTGGAATGCAGGATGAGGTCAGAGCGGTTGGCGAGGAGCAAAGGTCAGAGGAGCCAAAGCGCAGGGTGGATACTTCAGTGTCTTGGGAGGCGTTGATTTGTGTCGGATCGTCCAAGAAGAGAGCGAGGAAGG	CACGGCGTCTGGAATGCAGGATGAGGTCAGAGCGGTTGGCGAGTAGCAAAGGTCAGAGGAGCCAAAGCGCAGGGTGGATACTTCAGTGTCTTGGGAGGCGTTGATTTGTGTCGGATCGTCCAAGAAGAGAGCGAGGAAGG	5	WT	VKSATLSSTESTASGMQDEVRAVGEEQRSEEPKRRVDTSVSWEALICVGSSKKRARKASSSDDEGGPRTLGGDGHRAEEASKDKE	VKSATLSSTESTASGMQDEVRAVGEEQRSEEPKRRVDTSVSWEALICVGSSKKRARKASSSDDEGGPRTLGGDGHRAEEASKDKE
CACGGCGTCTGGAATGCAGGATGAGGTCAGAGCGGTTGGCGAGGAGCAAAGGTCAGAGGAGCCAAAGCGCAGGGTGGATACTTCAGTGTCTTGGGAGGCGTTGATTTGTGTCGGATCGTCCAAGAAGAGAGCGAGGAAGG	CACGGCGTCTGGAATGCAGGATGAGGTCAGAGCGGTTGGCGAGGAGCAAAGGTCAGAGGATCCAAAGCGCAGGGTGGATACTTCAGTGTCTTGGGAGGCGTTGATTTGTGTCGGATCGTCCAAGAAGAGAGCGAGGAAGG	5	WT	VKSATLSSTESTASGMQDEVRAVGEEQRSEEPKRRVDTSVSWEALICVGSSKKRARKASSSDDEGGPRTLGGDGHRAEEASKDKE	VKSATLSSTESTASGMQDEVRAVGEEQRSEEPKRRVDTSVSWEALICVGSSKKRARKASSSDDEGGPRTLGGDGHRAEEASKDKE
CACGGCGTCTGGAATGCAGGATGAGGTCAGAGCGGTTGGCGAGGAGCAAAGGTCAGAGGAGCCAAAGCGCAGGGTGGATACTTCAGTGTCTTGGGAGGCGTTGATTTGTGTCGGATCGTCCAAGAAGAGAGCGAGGAAGG	CACGGCGTCTGGTATGCAGGATGAGGTCAGAGCGGTTGGCGAGGAGCAAAGGTCAGAGGAGCCAAAGCGCAGGGTGGATACTTCAGTGTCTTGGGAGGCGTTGATTTGTGTCGGATCGTCCAAGAAGAGAGCGAGGAAGG	5	WT	VKSATLSSTESTASGMQDEVRAVGEEQRSEEPKRRVDTSVSWEALICVGSSKKRARKASSSDDEGGPRTLGGDGHRAEEASKDKE	VKSATLSSTESTASGMQDEVRAVGEEQRSEEPKRRVDTSVSWEALICVGSSKKRARKASSSDDEGGPRTLGGDGHRAEEASKDKE
CACGGCGTCTGGAATGCAGGATGAGGTCAGAGCGGTTGGCGAGGAGCAAAGGTCAGAGGAGCCAAAGCGCAGGGTGGATACTTCAGTGTCTTGGGAGGCGTTGATTTGTGTCGGATCGTCCAAGAAGAGAGCGAGGAAGG	CACGGCGTCTGGAATGCAGGATGAGGTTAGAGCGGTTGGCGAGGAGCAAAGGTCAGAGGAGCCAAAGCGCAGGGTGGATACTTCAGTGTCTTGGGAGGCGTTGATTTGTGTCGGATCGTCCAAGAAGAGAGCGAGGAAGG	5	WT	VKSATLSSTESTASGMQDEVRAVGEEQRSEEPKRRVDTSVSWEALICVGSSKKRARKASSSDDEGGPRTLGGDGHRAEEASKDKE	VKSATLSSTESTASGMQDEVRAVGEEQRSEEPKRRVDTSVSWEALICVGSSKKRARKASSSDDEGGPRTLGGDGHRAEEASKDKE
CACGGCGTCTGGAATGCAGGATGAGGTCAGAGCGGTTGGCGAGGAGCAAAGGTCAGAGGAGCCAAAGCGCAGGGTGGATACTTCAGTGTCTTGGGAGGCGTTGATTTGTGTCGGATCGTCCAAGAAGAGAGCGAGGAAGG	CACGGCGTCTGGAATGCAGGTTGAGGTCAGAGCGGTTGGCGAGGAGCAAAGGTCAGAGGAGCCAAAGCGCAGGGTGGATACTTCAGTGTCTTGGGAGGCGTTGATTTGTGTCGGATCGTCCAAGAAGAGAGCGAGGAAGG	5	WT	VKSATLSSTESTASGMQDEVRAVGEEQRSEEPKRRVDTSVSWEALICVGSSKKRARKASSSDDEGGPRTLGGDGHRAEEASKDKE	VKSATLSSTESTASGMQDEVRAVGEEQRSEEPKRRVDTSVSWEALICVGSSKKRARKASSSDDEGGPRTLGGDGHRAEEASKDKE
CACGGCGTCTGGAATGCAGGATGAGGTCAGAGCGGTTGGCGAGGAGCAAAGGTCAGAGGAGCCAAAGCGCAGGGTGGATACTTCAGTGTCTTGGGAGGCGTTGATTTGTGTCGGATCGTCCAAGAAGAGAGCGAGGAAGG	CACGGCGTCTGGAATGCAGGATGAGGTCAGAGCGGTTGGCGAGGAGCAAAGGTCAGAGGAGCCAAAGCGCAGGGTGGATACTTCAGTGTCTTGGGAGGCGTTGATTTGTGTCGGATCGTCCATGAAGAGAGCGAGGAAGG	5	WT	VKSATLSSTESTASGMQDEVRAVGEEQRSEEPKRRVDTSVSWEALICVGSSKKRARKASSSDDEGGPRTLGGDGHRAEEASKDKE	VKSATLSSTESTASGMQDEVRAVGEEQRSEEPKRRVDTSVSWEALICVGSSKKRARKASSSDDEGGPRTLGGDGHRAEEASKDKE
CACGGCGTCTGGAATGCAGGATGAGGTCAGAGCGGTTGGCGAGGAGCAAAGGTCAGAGGAGCCAAAGCGCAGGGTGGATACTTCAGTGTCTTGGGAGGCGTTGATTTGTGTCGGATCGTCCAAGAAGAGAGCGAGGAAGG	CACGGCGTCTGGAATGCAGGATGAGGTCAGAGCGGTTGGCGAGGAGCAAAGGTCAGAGGAGCCAAAGCGCAGGGTGGATATTTCAGTGTCTTGGGAGGCGTTGATTTGTGTCGGATCGTCCAAGAAGAGAGCGAGGAAGG	5	WT	VKSATLSSTESTASGMQDEVRAVGEEQRSEEPKRRVDTSVSWEALICVGSSKKRARKASSSDDEGGPRTLGGDGHRAEEASKDKE	VKSATLSSTESTASGMQDEVRAVGEEQRSEEPKRRVDTSVSWEALICVGSSKKRARKASSSDDEGGPRTLGGDGHRAEEASKDKE
CACGGCGTCTGGAATGCAGGATGAGGTCAGAGCGGTTGGCGAGGAGCAAAGGTCAGAGGAGCCAAAGCGCAGGGTGGATACTTCAGTGTCTTGGGAGGCGTTGATTTGTGTCGGATCGTCCAAGAAGAGAGCGAGGAAGG	CACGGCGTCTGGAATGCAAGATGAGGTCAGAGCGGTTGGCGAGGAGCAAAGGTCAGAGGAGCCAAAGCGCAGGGTGGATACTTCAGTGTCTTGGGAGGCGTTGATTTGTGTCGGATCGTCCAAGAAGAGAGCGAGGAAGG	5	WT	VKSATLSSTESTASGMQDEVRAVGEEQRSEEPKRRVDTSVSWEALICVGSSKKRARKASSSDDEGGPRTLGGDGHRAEEASKDKE	VKSATLSSTESTASGMQDEVRAVGEEQRSEEPKRRVDTSVSWEALICVGSSKKRARKASSSDDEGGPRTLGGDGHRAEEASKDKE
CACGGCGTCTGGAATGCAGGATGAGGTCAGAGCGGTTGGCGAGGAGCAAAGGTCAGAGGAGCCAAAGCGCAGGGTGGATACTTCAGTGTCTTGGGAGGCGTTGATTTGTGTCGGATCGTCCAAGAAGAGAGCGAGGAAGG	CACGGCGTCTGGAATGCAGGATGAGGTCAGAGCGGTTGGCGAGGAGCAAAGGTCAGAGGAGCCAAAGCGCAGGGTGGATACTTCAGGGTCTTGGGAGGCGTTGATTTGTGTCGGATCGTCCAAGAAGAGAGCGAGGAAGG	5	WT	VKSATLSSTESTASGMQDEVRAVGEEQRSEEPKRRVDTSVSWEALICVGSSKKRARKASSSDDEGGPRTLGGDGHRAEEASKDKE	VKSATLSSTESTASGMQDEVRAVGEEQRSEEPKRRVDTSVSWEALICVGSSKKRARKASSSDDEGGPRTLGGDGHRAEEASKDKE
CACGGCGTCTGGAATGCAGGATGAGGTCAGAGCGGTTGGCGAGGAGCAAAGGTCAGAGGAGCCAAAGCGCAGGGTGGATACTTCAGTGTCTTGGGAGGCGTTGATTTGTGTCGGATCGTCCAAGAAGAGAGCGAGGAAGG	CACGGCGTCTGGAATGCAGGATGAGGTCAGAGCGGTTGGCGAGGAGCAAAGGTCAGAGGAGCCAACGCGCAGGGTGGATACTTCAGTGTCTTGGGAGGCGTTGATTTGTGTCGGATCGTCCAAGAAGAGAGCGAGGAAGG	5	WT	VKSATLSSTESTASGMQDEVRAVGEEQRSEEPKRRVDTSVSWEALICVGSSKKRARKASSSDDEGGPRTLGGDGHRAEEASKDKE	VKSATLSSTESTASGMQDEVRAVGEEQRSEEPKRRVDTSVSWEALICVGSSKKRARKASSSDDEGGPRTLGGDGHRAEEASKDKE
CACGGCGTCTGGAATGCAGGATGAGGTCAGAGCGGTTGGCGAGGAGCAAAGGTCAGAGGAGCCAAAGCGCAGGGTGGATACTTCAGTGTCTTGGGAGGCGTTGATTTGTGTCGGATCGTCCAAGAAGAGAGCGAGGAAGG	CACGGCGTCTGGAATGCAGGAAGAGGTCAGAGCGGTTGGCGAGGAGCAAAGGTCAGAGGAGCCAAAGCGCAGGGTGGATACTTCAGTGTCTTGGGAGGCGTTGATTTGTGTCGGATCGTCCAAGAAGAGAGCGAGGAAGG	5	WT	VKSATLSSTESTASGMQDEVRAVGEEQRSEEPKRRVDTSVSWEALICVGSSKKRARKASSSDDEGGPRTLGGDGHRAEEASKDKE	VKSATLSSTESTASGMQDEVRAVGEEQRSEEPKRRVDTSVSWEALICVGSSKKRARKASSSDDEGGPRTLGGDGHRAEEASKDKE
CACGGCGTCTGGAATGCAGGATGAGGTCAGAGCGGTTGGCGAGGAGCAAAGGTCAGAGGAGCCAAAGCGCAGGGTGGATACTTCAGTGTCTTGGGAGGCGTTGATTTGTGTCGGATCGTCCAAGAAGAGAGCGAGGAAGG	CACGGCGTCTGGAATGCAGGATGAGGTCAGAGCGGTTGGCGAGGAGCAAAGGTCAGAGGAGCCAAAGCGCAGGGTGGATACTTCAGTGTCTTGGGAGGCGTTGATGTGTGTCGGATCGTCCAAGAAGAGAGCGAGGAAGG	5	WT	VKSATLSSTESTASGMQDEVRAVGEEQRSEEPKRRVDTSVSWEALICVGSSKKRARKASSSDDEGGPRTLGGDGHRAEEASKDKE	VKSATLSSTESTASGMQDEVRAVGEEQRSEEPKRRVDTSVSWEALICVGSSKKRARKASSSDDEGGPRTLGGDGHRAEEASKDKE
CACGGCGTCTGGAATGCAGGATGAGGTCAGAGCGGTTGGCGAGGAGCAAAGGTCAGAGGAGCCAAAGCGCAGGGTGGATACTTCAGTGTCTTGGGAGGCGTTGATTTGTGTCGGATCGTCCAAGAAGAGAGCGAGGAAGG	CACGGCGTCTGGAATGCAGGATGAGGTCAGAGCGGTTGGCGAGGAGCAAAGGTCAGAGGAGCCTAAGCGCAGGGTGGATACTTCAGTGTCTTGGGAGGCGTTGATTTGTGTCGGATCGTCCAAGAAGAGAGCGAGGAAGG	5	WT	VKSATLSSTESTASGMQDEVRAVGEEQRSEEPKRRVDTSVSWEALICVGSSKKRARKASSSDDEGGPRTLGGDGHRAEEASKDKE	VKSATLSSTESTASGMQDEVRAVGEEQRSEEPKRRVDTSVSWEALICVGSSKKRARKASSSDDEGGPRTLGGDGHRAEEASKDKE
CACGGCGTCTGGAATGCAGGATGAGGTCAGAGCGGTTGGCGAGGAGCAAAGGTCAGAGGAGCCAAAGCGCAGGGTGGATACTTCAGTGTCTTGGGAGGCGTTGATTTGTGTCGGATCGTCCAAGAAGAGAGCGAGGAAGG	CACGGCGTCTGGAATGCAGGATGAGGTCAGAGCGGTTGGCGAGAAGCAAAGGTCAGAGGAGCCAAAGCGCAGGGTGGATACTTCAGTGTCTTGGGAGGCGTTGATTTGTGTCGGATCGTCCAAGAAGAGAGCGAGGAAGG	5	WT	VKSATLSSTESTASGMQDEVRAVGEEQRSEEPKRRVDTSVSWEALICVGSSKKRARKASSSDDEGGPRTLGGDGHRAEEASKDKE	VKSATLSSTESTASGMQDEVRAVGEEQRSEEPKRRVDTSVSWEALICVGSSKKRARKASSSDDEGGPRTLGGDGHRAEEASKDKE
CACGGCGTCTGGAATGCAGGATGAGGTCAGAGCGGTTGGCGAGGAGCAAAGGTCAGAGGAGCCAAAGCGCAGGGTGGATACTTCAGTGTCTTGGGAGGCGTTGATTTGTGTCGGATCGTCCAAGAAGAGAGCGAGGAAGG	CACGGCGTCTGGAATGCAGGATGAGGTCAGAGCGGTTGGCGAGGAGCAAAGGTCAGAGGAGCCAAAGCGCAGGGTGGATACTTCAATGTCTTGGGAGGCGTTGATTTGTGTCGGATCGTCCAAGAAGAGAGCGAGGAAGG	5	WT	VKSATLSSTESTASGMQDEVRAVGEEQRSEEPKRRVDTSVSWEALICVGSSKKRARKASSSDDEGGPRTLGGDGHRAEEASKDKE	VKSATLSSTESTASGMQDEVRAVGEEQRSEEPKRRVDTSVSWEALICVGSSKKRARKASSSDDEGGPRTLGGDGHRAEEASKDKE
CACGGCGTCTGGAATGCAGGATGAGGTCAGAGCGGTTGGCGAGGAGCAAAGGTCAGAGGAGCCAAAGCGCAGGGTGGATACTTCAGTGTCTTGGGAGGCGTTGATTTGTGTCGGATCGTCCAAGAAGAGAGCGAGGAAGG	CACGGCGTCTGGAATGCAGGATGAGGTCAGAGCGGTTGGCGAGGAGCAAAGGTCAGAGGAGCCAAAGCGCAGGGTGGATACTTCAGTGTCTTGGGAGGCGTTGATTTGTGTCGGATCGTCCAAGAAGAGAGCGAGGTAGG	5	WT	VKSATLSSTESTASGMQDEVRAVGEEQRSEEPKRRVDTSVSWEALICVGSSKKRARKASSSDDEGGPRTLGGDGHRAEEASKDKE	VKSATLSSTESTASGMQDEVRAVGEEQRSEEPKRRVDTSVSWEALICVGSSKKRARKASSSDDEGGPRTLGGDGHRAEEASKDKE
CACGGCGTCTGGAATGCAGGATGAGGTCAGAGCGGTTGGCGAGGAGCAAAGGTCAGAGGAGCCAAAGCGCAGGGTGGATACTTCAGTGTCTTGGGAGGCGTTGATTTGTGTCGGATCGTCCAAGAAGAGAGCGAGGAAGG	CACGGCGTCTGGAATGCAGGATGAGTTCAGAGCGGTTGGCGAGGAGCAAAGGTCAGAGGAGCCAAAGCGCAGGGTGGATACTTCAGTGTCTTGGGAGGCGTTGATTTGTGTCGGATCGTCCAAGAAGAGAGCGAGGAAGG	4	WT	VKSATLSSTESTASGMQDEVRAVGEEQRSEEPKRRVDTSVSWEALICVGSSKKRARKASSSDDEGGPRTLGGDGHRAEEASKDKE	VKSATLSSTESTASGMQDEVRAVGEEQRSEEPKRRVDTSVSWEALICVGSSKKRARKASSSDDEGGPRTLGGDGHRAEEASKDKE
CACGGCGTCTGGAATGCAGGATGAGGTCAGAGCGGTTGGCGAGGAGCAAAGGTCAGAGGAGCCAAAGCGCAGGGTGGATACTTCAGTGTCTTGGGAGGCGTTGATTTGTGTCGGATCGTCCAAGAAGAGAGCGAGGAAGG	CACGGCGTCTGGAATGCAGGATGAGGTCAGAGCGGTTGGCGAGGAGCAAAGGTCAGAGGAGCCAAAGCGCAGGGTGGATACTTCAGTGTCTTGGGAGGCGTTGATTTGTGTCGGATCGACCAAGAAGAGAGCGAGGAAGG	4	WT	VKSATLSSTESTASGMQDEVRAVGEEQRSEEPKRRVDTSVSWEALICVGSSKKRARKASSSDDEGGPRTLGGDGHRAEEASKDKE	VKSATLSSTESTASGMQDEVRAVGEEQRSEEPKRRVDTSVSWEALICVGSSKKRARKASSSDDEGGPRTLGGDGHRAEEASKDKE
CACGGCGTCTGGAATGCAGGATGAGGTCAGAGCGGTTGGCGAGGAGCAAAGGTCAGAGGAGCCAAAGCGCAGGGTGGATACTTCAGTGTCTTGGGAGGCGTTGATTTGTGTCGGATCGTCCAAGAAGAGAGCGAGGAAGG	CACGGCGTCTGGAATGCAGGATGAGGTCAGAGCGGTTGACGAGGAGCAAAGGTCAGAGGAGCCAAAGCGCAGGGTGGATACTTCAGTGTCTTGGGAGGCGTTGATTTGTGTCGGATCGTCCAAGAAGAGAGCGAGGAAGG	4	WT	VKSATLSSTESTASGMQDEVRAVGEEQRSEEPKRRVDTSVSWEALICVGSSKKRARKASSSDDEGGPRTLGGDGHRAEEASKDKE	VKSATLSSTESTASGMQDEVRAVGEEQRSEEPKRRVDTSVSWEALICVGSSKKRARKASSSDDEGGPRTLGGDGHRAEEASKDKE
CACGGCGTCTGGAATGCAGGATGAGGTCAGAGCGGTTGGCGAGGAGCAAAGGTCAGAGGAGCCAAAGCGCAGGGTGGATACTTCAGTGTCTTGGGAGGCGTTGATTTGTGTCGGATCGTCCAAGAAGAGAGCGAGGAAGG	CACGGCGTCTGGAATGCAGGATGAGGTCAGAGCGGTTGGCGAGGAGCAAAGGTCAGAGGAGACAAAGCGCAGGGTGGATACTTCAGTGTCTTGGGAGGCGTTGATTTGTGTCGGATCGTCCAAGAAGAGAGCGAGGAAGG	4	WT	VKSATLSSTESTASGMQDEVRAVGEEQRSEEPKRRVDTSVSWEALICVGSSKKRARKASSSDDEGGPRTLGGDGHRAEEASKDKE	VKSATLSSTESTASGMQDEVRAVGEEQRSEEPKRRVDTSVSWEALICVGSSKKRARKASSSDDEGGPRTLGGDGHRAEEASKDKE
CACGGCGTCTGGAATGCAGGATGAGGTCAGAGCGGTTGGCGAGGAGCAAAGGTCAGAGGAGCCAAAGCGCAGGGTGGATACTTCAGTGTCTTGGGAGGCGTTGATTTGTGTCGGATCGTCCAAGAAGAGAGCGAGGAAGG	CACGGCGTCAGGAATGCAGGATGAGGTCAGAGCGGTTGGCGAGGAGCAAAGGTCAGAGGAGCCAAAGCGCAGGGTGGATACTTCAGTGTCTTGGGAGGCGTTGATTTGTGTCGGATCGTCCAAGAAGAGAGCGAGGAAGG	4	WT	VKSATLSSTESTASGMQDEVRAVGEEQRSEEPKRRVDTSVSWEALICVGSSKKRARKASSSDDEGGPRTLGGDGHRAEEASKDKE	VKSATLSSTESTASGMQDEVRAVGEEQRSEEPKRRVDTSVSWEALICVGSSKKRARKASSSDDEGGPRTLGGDGHRAEEASKDKE
CACGGCGTCTGGAATGCAGGATGAGGTCAGAGCGGTTGGCGAGGAGCAAAGGTCAGAGGAGCCAAAGCGCAGGGTGGATACTTCAGTGTCTTGGGAGGCGTTGATTTGTGTCGGATCGTCCAAGAAGAGAGCGAGGAAGG	CACGGCGTCTGGAATGCAGGATGAGGTCAGAGCGGTTGGCGAGGAGCAAAGGTCAGTGGAGCCAAAGCGCAGGGTGGATACTTCAGTGTCTTGGGAGGCGTTGATTTGTGTCGGATCGTCCAAGAAGAGAGCGAGGAAGG	4	WT	VKSATLSSTESTASGMQDEVRAVGEEQRSEEPKRRVDTSVSWEALICVGSSKKRARKASSSDDEGGPRTLGGDGHRAEEASKDKE	VKSATLSSTESTASGMQDEVRAVGEEQRSEEPKRRVDTSVSWEALICVGSSKKRARKASSSDDEGGPRTLGGDGHRAEEASKDKE
CACGGCGTCTGGAATGCAGGATGAGGTCAGAGCGGTTGGCGAGGAGCAAAGGTCAGAGGAGCCAAAGCGCAGGGTGGATACTTCAGTGTCTTGGGAGGCGTTGATTTGTGTCGGATCGTCCAAGAAGAGAGCGAGGAAGG	CACGGCGTCTGGAATGCAGGATGAGGTCAGAGCGGTTGGCGAGGAGCAAAGGTCAGAGGAGCCAAAGCGCAGGTTGGATACTTCAGTGTCTTGGGAGGCGTTGATTTGTGTCGGATCGTCCAAGAAGAGAGCGAGGAAGG	4	WT	VKSATLSSTESTASGMQDEVRAVGEEQRSEEPKRRVDTSVSWEALICVGSSKKRARKASSSDDEGGPRTLGGDGHRAEEASKDKE	VKSATLSSTESTASGMQDEVRAVGEEQRSEEPKRRVDTSVSWEALICVGSSKKRARKASSSDDEGGPRTLGGDGHRAEEASKDKE
CACGGCGTCTGGAATGCAGGATGAGGTCAGAGCGGTTGGCGAGGAGCAAAGGTCAGAGGAGCCAAAGCGCAGGGTGGATACTTCAGTGTCTTGGGAGGCGTTGATTTGTGTCGGATCGTCCAAGAAGAGAGCGAGGAAGG	CACGGCGTCTGGAATGCAGGATGAGGTCAGAGCGGTTGGCGAGGAGCAAAGGTCAGAGGAGCCAAAGCGCAGGGTGGATACTTCAGTGTCTTGGGAGGCGTTGATTTGAGTCGGATCGTCCAAGAAGAGAGCGAGGAAGG	4	WT	VKSATLSSTESTASGMQDEVRAVGEEQRSEEPKRRVDTSVSWEALICVGSSKKRARKASSSDDEGGPRTLGGDGHRAEEASKDKE	VKSATLSSTESTASGMQDEVRAVGEEQRSEEPKRRVDTSVSWEALICVGSSKKRARKASSSDDEGGPRTLGGDGHRAEEASKDKE
CACGGCGTCTGGAATGCAGGATGAGGTCAGAGCGGTTGGCGAGGAGCAAAGGTCAGAGGAGCCAAAGCGCAGGGTGGATACTTCAGTGTCTTGGGAGGCGTTGATTTGTGTCGGATCGTCCAAGAAGAGAGCGAGGAAGG	CAAGGCGTCTGGAATGCAGGATGAGGTCAGAGCGGTTGGCGAGGAGCAAAGGTCAGAGGAGCCAAAGCGCAGGGTGGATACTTCAGTGTCTTGGGAGGCGTTGATTTGTGTCGGATCGTCCAAGAAGAGAGCGAGGAAGG	4	WT	VKSATLSSTESTASGMQDEVRAVGEEQRSEEPKRRVDTSVSWEALICVGSSKKRARKASSSDDEGGPRTLGGDGHRAEEASKDKE	VKSATLSSTESTASGMQDEVRAVGEEQRSEEPKRRVDTSVSWEALICVGSSKKRARKASSSDDEGGPRTLGGDGHRAEEASKDKE
CACGGCGTCTGGAATGCAGGATGAGGTCAGAGCGGTTGGCGAGGAGCAAAGGTCAGAGGAGCCAAAGCGCAGGGTGGATACTTCAGTGTCTTGGGAGGCGTTGATTTGTGTCGGATCGTCCAAGAAGAGAGCGAGGAAGG	CACGGCGTCTGGAATGCAGGATGAGGTCAGAGCGGTTGGCGAGGAGCAAAGGTCAGCGGAGCCAAAGCGCAGGGTGGATACTTCAGTGTCTTGGGAGGCGTTGATTTGTGTCGGATCGTCCAAGAAGAGAGCGAGGAAGG	4	WT	VKSATLSSTESTASGMQDEVRAVGEEQRSEEPKRRVDTSVSWEALICVGSSKKRARKASSSDDEGGPRTLGGDGHRAEEASKDKE	VKSATLSSTESTASGMQDEVRAVGEEQRSEEPKRRVDTSVSWEALICVGSSKKRARKASSSDDEGGPRTLGGDGHRAEEASKDKE
CACGGCGTCTGGAATGCAGGATGAGGTCAGAGCGGTTGGCGAGGAGCAAAGGTCAGAGGAGCCAAAGCGCAGGGTGGATACTTCAGTGTCTTGGGAGGCGTTGATTTGTGTCGGATCGTCCAAGAAGAGAGCGAGGAAGG	CACGGCGTCTGGAATGCAGGATGAGGTCAGAGCGGTTGGCGAGGAGCAAAGGTCAGAGGAGCCAAAGCGCAGGGTGGATACTTCAGTGTCTTGGGAGGCGTTGATTTGTGACGGATCGTCCAAGAAGAGAGCGAGGAAGG	4	WT	VKSATLSSTESTASGMQDEVRAVGEEQRSEEPKRRVDTSVSWEALICVGSSKKRARKASSSDDEGGPRTLGGDGHRAEEASKDKE	VKSATLSSTESTASGMQDEVRAVGEEQRSEEPKRRVDTSVSWEALICVGSSKKRARKASSSDDEGGPRTLGGDGHRAEEASKDKE
CACGGCGTCTGGAATGCAGGATGAGGTCAGAGCGGTTGGCGAGGAGCAAAGGTCAGAGGAGCCAAAGCGCAGGGTGGATACTTCAGTGTCTTGGGAGGCGTTGATTTGTGTCGGATCGTCCAAGAAGAGAGCGAGGAAGG	CACGGCGTCTGGAATGCAGGATGAGGTCAGAGCGGTTGGCGAGGAGCAAAGGTCAGAGGAGCCAAAGCGCAGGGTGGATACTTCAGTGTCTTGGGAGGCGTTGATTTGTGTCGGATCGTCCAAGAAGAGAGCGTGGAAGG	4	WT	VKSATLSSTESTASGMQDEVRAVGEEQRSEEPKRRVDTSVSWEALICVGSSKKRARKASSSDDEGGPRTLGGDGHRAEEASKDKE	VKSATLSSTESTASGMQDEVRAVGEEQRSEEPKRRVDTSVSWEALICVGSSKKRARKASSSDDEGGPRTLGGDGHRAEEASKDKE
CACGGCGTCTGGAATGCAGGATGAGGTCAGAGCGGTTGGCGAGGAGCAAAGGTCAGAGGAGCCAAAGCGCAGGGTGGATACTTCAGTGTCTTGGGAGGCGTTGATTTGTGTCGGATCGTCCAAGAAGAGAGCGAGGAAGG	CACGGCGTCTGGAATGCAGGATGAGGTCAGAGCGGTTGGCGAGGAGCAAAGGTCAGAGGAGCCAAAGCGCAGGGTGGATACTTCAGTGTCTTGGGAGGCGTGGATTTGTGTCGGATCGTCCAAGAAGAGAGCGAGGAAGG	4	WT	VKSATLSSTESTASGMQDEVRAVGEEQRSEEPKRRVDTSVSWEALICVGSSKKRARKASSSDDEGGPRTLGGDGHRAEEASKDKE	VKSATLSSTESTASGMQDEVRAVGEEQRSEEPKRRVDTSVSWEALICVGSSKKRARKASSSDDEGGPRTLGGDGHRAEEASKDKE
CACGGCGTCTGGAATGCAGGATGAGGTCAGAGCGGTTGGCGAGGAGCAAAGGTCAGAGGAGCCAAAGCGCAGGGTGGATACTTCAGTGTCTTGGGAGGCGTTGATTTGTGTCGGATCGTCCAAGAAGAGAGCGAGGAAGG	CACGGCGTCTGGAATGCAGGATGAGGTCAGAGCGGTTGGCGAGGAGCGAAGGTCAGAGGAGCCAAAGCGCAGGGTGGATACTTCAGTGTCTTGGGAGGCGTTGATTTGTGTCGGATCGTCCAAGACGAGAGCGAGGAAGG	4	WT	VKSATLSSTESTASGMQDEVRAVGEEQRSEEPKRRVDTSVSWEALICVGSSKKRARKASSSDDEGGPRTLGGDGHRAEEASKDKE	VKSATLSSTESTASGMQDEVRAVGEEQRSEEPKRRVDTSVSWEALICVGSSKKRARKASSSDDEGGPRTLGGDGHRAEEASKDKE
CACGGCGTCTGGAATGCAGGATGAGGTCAGAGCGGTTGGCGAGGAGCAAAGGTCAGAGGAGCCAAAGCGCAGGGTGGATACTTCAGTGTCTTGGGAGGCGTTGATTTGTGTCGGATCGTCCAAGAAGAGAGCGAGGAAGG	CACGGCGTCTGTAATGCAGGATGAGGTCAGAGCGGTTGGCGAGGAGCAAAGGTCAGAGGAGCCAAAGCGCAGGGTGGATACTTCAGTGTCTTGGGAGGCGTTGATTTGTGTCGGATCGTCCAAGAAGAGAGCGAGGAAGG	4	WT	VKSATLSSTESTASGMQDEVRAVGEEQRSEEPKRRVDTSVSWEALICVGSSKKRARKASSSDDEGGPRTLGGDGHRAEEASKDKE	VKSATLSSTESTASGMQDEVRAVGEEQRSEEPKRRVDTSVSWEALICVGSSKKRARKASSSDDEGGPRTLGGDGHRAEEASKDKE
CACGGCGTCTGGAATGCAGGATGAGGTCAGAGCGGTTGGCGAGGAGCAAAGGTCAGAGGAGCCAAAGCGCAGGGTGGATACTTCAGTGTCTTGGGAGGCGTTGATTTGTGTCGGATCGTCCAAGAAGAGAGCGAGGAAGG	CACGGCGTCTGGAATGCAGGATGAGGTCAGAGCGGTTGGCGAGGAGCAAAGGTCAGAGGAGCCAAAGCGCAGGGTGGATACTTCAGTGTCTGGGGAGGCGTTGATTTGTGTCGGATCGTCCAAGAAGAGAGCGAGGAAGG	4	WT	VKSATLSSTESTASGMQDEVRAVGEEQRSEEPKRRVDTSVSWEALICVGSSKKRARKASSSDDEGGPRTLGGDGHRAEEASKDKE	VKSATLSSTESTASGMQDEVRAVGEEQRSEEPKRRVDTSVSWEALICVGSSKKRARKASSSDDEGGPRTLGGDGHRAEEASKDKE
CACGGCGTCTGGAATGCAGGATGAGGTCAGAGCGGTTGGCGAGGAGCAAAGGTCAGAGGAGCCAAAGCGCAGGGTGGATACTTCAGTGTCTTGGGAGGCGTTGATTTGTGTCGGATCGTCCAAGAAGAGAGCGAGGAAGG	CACGGCGTCTGGAATGCAGGATGAGGTCAGAGCGGTTGGCGAGGAGCAAAGGTCAGAGGAGCCAAAGCGCAGGGTGGAGACTTCAGTGTCTTGGGAGGCGTTGATTTGTGTCGGATCGTCCAAGAAGAGAGCGAGGAAGG	4	WT	VKSATLSSTESTASGMQDEVRAVGEEQRSEEPKRRVDTSVSWEALICVGSSKKRARKASSSDDEGGPRTLGGDGHRAEEASKDKE	VKSATLSSTESTASGMQDEVRAVGEEQRSEEPKRRVDTSVSWEALICVGSSKKRARKASSSDDEGGPRTLGGDGHRAEEASKDKE
CACGGCGTCTGGAATGCAGGATGAGGTCAGAGCGGTTGGCGAGGAGCAAAGGTCAGAGGAGCCAAAGCGCAGGGTGGATACTTCAGTGTCTTGGGAGGCGTTGATTTGTGTCGGATCGTCCAAGAAGAGAGCGAGGAAGG	CACGGCGTCTGGAAGGCAGGATGAGGTCAGAGCGGTTGGCGAGGAGCAAAGGTCAGAGGAGCCAAAGCGCAGGGTGGATACTTCAGTGTCTTGGGAGGCGTTGATTTGTGTCGGATCGTCCAAGAAGAGAGCGAGGAAGG	4	WT	VKSATLSSTESTASGMQDEVRAVGEEQRSEEPKRRVDTSVSWEALICVGSSKKRARKASSSDDEGGPRTLGGDGHRAEEASKDKE	VKSATLSSTESTASGMQDEVRAVGEEQRSEEPKRRVDTSVSWEALICVGSSKKRARKASSSDDEGGPRTLGGDGHRAEEASKDKE
CACGGCGTCTGGAATGCAGGATGAGGTCAGAGCGGTTGGCGAGGAGCAAAGGTCAGAGGAGCCAAAGCGCAGGGTGGATACTTCAGTGTCTTGGGAGGCGTTGATTTGTGTCGGATCGTCCAAGAAGAGAGCGAGGAAGG	CACGGCGTCTGGAATGCAGGATGAGGTCAGAGCGGTTGGCGAGGAGCAAAGGTCAGAGGAGCCAAAGCGCAGGGTGGATACTTCAGTGTCTTGGGAGGCGTTGATTTGTGTCGGATCGTCCACGAAGAGAGCGAGGAAGG	4	WT	VKSATLSSTESTASGMQDEVRAVGEEQRSEEPKRRVDTSVSWEALICVGSSKKRARKASSSDDEGGPRTLGGDGHRAEEASKDKE	VKSATLSSTESTASGMQDEVRAVGEEQRSEEPKRRVDTSVSWEALICVGSSKKRARKASSSDDEGGPRTLGGDGHRAEEASKDKE
CACGGCGTCTGGAATGCAGGATGAGGTCAGAGCGGTTGGCGAGGAGCAAAGGTCAGAGGAGCCAAAGCGCAGGGTGGATACTTCAGTGTCTTGGGAGGCGTTGATTTGTGTCGGATCGTCCAAGAAGAGAGCGAGGAAGG	CACGGCGTCTGGAATGTAGGATGAGGTCAGAGCGGTTGGCGAGGAGCAAAGGTCAGAGGAGCCAAAGCGCAGGGTGGATACTTCAGTGTCTTGGGAGGCGTTGATTTGTGTCGGATCGTCCAAGAAGAGAGCGAGGAAGG	4	WT	VKSATLSSTESTASGMQDEVRAVGEEQRSEEPKRRVDTSVSWEALICVGSSKKRARKASSSDDEGGPRTLGGDGHRAEEASKDKE	VKSATLSSTESTASGMQDEVRAVGEEQRSEEPKRRVDTSVSWEALICVGSSKKRARKASSSDDEGGPRTLGGDGHRAEEASKDKE
CACGGCGTCTGGAATGCAGGATGAGGTCAGAGCGGTTGGCGAGGAGCAAAGGTCAGAGGAGCCAAAGCGCAGGGTGGATACTTCAGTGTCTTGGGAGGCGTTGATTTGTGTCGGATCGTCCAAGAAGAGAGCGAGGAAGG	CACGGCGTCTGGAATGCAGGATGAGGTCAGAGCGGTTGGCGAGGAGCAAAGGTCAGAGGAGCCAAAGCGCAGGGTGGATACTTCAGTGTCTTGTGAGGCGTTGATTTGTGTCGGATCGTCCAAGAAGAGAGCGAGGAAGG	4	WT	VKSATLSSTESTASGMQDEVRAVGEEQRSEEPKRRVDTSVSWEALICVGSSKKRARKASSSDDEGGPRTLGGDGHRAEEASKDKE	VKSATLSSTESTASGMQDEVRAVGEEQRSEEPKRRVDTSVSWEALICVGSSKKRARKASSSDDEGGPRTLGGDGHRAEEASKDKE
CACGGCGTCTGGAATGCAGGATGAGGTCAGAGCGGTTGGCGAGGAGCAAAGGTCAGAGGAGCCAAAGCGCAGGGTGGATACTTCAGTGTCTTGGGAGGCGTTGATTTGTGTCGGATCGTCCAAGAAGAGAGCGAGGAAGG	CACGGCGTCTGGAATGCTGGATGAGGTCAGAGCGGTTGGCGAGGAGCAAAGGTCAGAGGAGCCAAAGCGCAGGGTGGATACTTCAGTGTCTTGGGAGGCGTTGATTTGTGTCGGATCGTCCAAGAAGAGAGCGAGGAAGG	4	WT	VKSATLSSTESTASGMQDEVRAVGEEQRSEEPKRRVDTSVSWEALICVGSSKKRARKASSSDDEGGPRTLGGDGHRAEEASKDKE	VKSATLSSTESTASGMQDEVRAVGEEQRSEEPKRRVDTSVSWEALICVGSSKKRARKASSSDDEGGPRTLGGDGHRAEEASKDKE
CACGGCGTCTGGAATGCAGGATGAGGTCAGAGCGGTTGGCGAGGAGCAAAGGTCAGAGGAGCCAAAGCGCAGGGTGGATACTTCAGTGTCTTGGGAGGCGTTGATTTGTGTCGGATCGTCCAAGAAGAGAGCGAGGAAGG	CACGGCGTCTGGAATGCAGGATGAGGTCAGAGCGGTTGGCGAGGAGCAAAGGTCAGAGGAGCAAAAGCGCAGGGTGGATACTTCAGTGTCTTGGGAGGCGTTGATTTGTGTCGGATCGTCCAAGAAGAGAGCGAGGAAGG	4	WT	VKSATLSSTESTASGMQDEVRAVGEEQRSEEPKRRVDTSVSWEALICVGSSKKRARKASSSDDEGGPRTLGGDGHRAEEASKDKE	VKSATLSSTESTASGMQDEVRAVGEEQRSEEPKRRVDTSVSWEALICVGSSKKRARKASSSDDEGGPRTLGGDGHRAEEASKDKE
CACGGCGTCTGGAATGCAGGATGAGGTCAGAGCGGTTGGCGAGGAGCAAAGGTCAGAGGAGCCAAAGCGCAGGGTGGATACTTCAGTGTCTTGGGAGGCGTTGATTTGTGTCGGATCGTCCAAGAAGAGAGCGAGGAAGG	CACGGCGTCTGGAATGCAGGATGAGGTCAGAGCGGTTGGCTAGGAGCAAAGGTCAGAGGAGCCAAAGCGCAGGGTGGATACTTCAGTGTCTTGGGAGGCGTTGATTTGTGTCGGATCGTCCAAGAAGAGAGCGAGGAAGG	4	WT	VKSATLSSTESTASGMQDEVRAVGEEQRSEEPKRRVDTSVSWEALICVGSSKKRARKASSSDDEGGPRTLGGDGHRAEEASKDKE	VKSATLSSTESTASGMQDEVRAVGEEQRSEEPKRRVDTSVSWEALICVGSSKKRARKASSSDDEGGPRTLGGDGHRAEEASKDKE
CACGGCGTCTGGAATGCAGGATGAGGTCAGAGCGGTTGGCGAGGAGCAAAGGTCAGAGGAGCCAAAGCGCAGGGTGGATACTTCAGTGTCTTGGGAGGCGTTGATTTGTGTCGGATCGTCCAAGAAGAGAGCGAGGAAGG	CACGGCGTCTGGAATGCAGGATGAGGTCAGAGCGGTTGGCGAGGAGCAAAGGTCAGAGGAGCCAAAGCGCAGGGTGGATACTTCAGTGTCTTGGGAGGCGTTGATTTGTCTCGGATCGTCCAAGAAGAGAGCGAGGAAGG	4	WT	VKSATLSSTESTASGMQDEVRAVGEEQRSEEPKRRVDTSVSWEALICVGSSKKRARKASSSDDEGGPRTLGGDGHRAEEASKDKE	VKSATLSSTESTASGMQDEVRAVGEEQRSEEPKRRVDTSVSWEALICVGSSKKRARKASSSDDEGGPRTLGGDGHRAEEASKDKE
CACGGCGTCTGGAATGCAGGATGAGGTCAGAGCGGTTGGCGAGGAGCAAAGGTCAGAGGAGCCAAAGCGCAGGGTGGATACTTCAGTGTCTTGGGAGGCGTTGATTTGTGTCGGATCGTCCAAGAAGAGAGCGAGGAAGG	CACGGCGTCTGGAATGCAGGATGAGGTCAGAGCTGTTGGCGAGGAGCAAAGGTCAGAGGAGCCAAAGCGCAGGGTGGATACTTCAGTGTCTTGGGAGGCGTTGATTTGTGTCGGATCGTCCAAGAAGAGAGCGAGGAAGG	4	WT	VKSATLSSTESTASGMQDEVRAVGEEQRSEEPKRRVDTSVSWEALICVGSSKKRARKASSSDDEGGPRTLGGDGHRAEEASKDKE	VKSATLSSTESTASGMQDEVRAVGEEQRSEEPKRRVDTSVSWEALICVGSSKKRARKASSSDDEGGPRTLGGDGHRAEEASKDKE
CACGGCGTCTGGAATGCAGGATGAGGTCAGAGCGGTTGGCGAGGAGCAAAGGTCAGAGGAGCCAAAGCGCAGGGTGGATACTTCAGTGTCTTGGGAGGCGTTGATTTGTGTCGGATCGTCCAAGAAGAGAGCGAGGAAGG	CACGGCGTCTGGAATGCAGGATGAGGTCAGAGCGGTTGGCGAGGAGCAAAGGTCAGAGGTGCCAAAGCGCAGGGTGGATACTTCAGTGTCTTGGGAGGCGTTGATTTGTGTCGGATCGTCCAAGAAGAGAGCGAGGAAGG	4	WT	VKSATLSSTESTASGMQDEVRAVGEEQRSEEPKRRVDTSVSWEALICVGSSKKRARKASSSDDEGGPRTLGGDGHRAEEASKDKE	VKSATLSSTESTASGMQDEVRAVGEEQRSEEPKRRVDTSVSWEALICVGSSKKRARKASSSDDEGGPRTLGGDGHRAEEASKDKE
CACGGCGTCTGGAATGCAGGATGAGGTCAGAGCGGTTGGCGAGGAGCAAAGGTCAGAGGAGCCAAAGCGCAGGGTGGATACTTCAGTGTCTTGGGAGGCGTTGATTTGTGTCGGATCGTCCAAGAAGAGAGCGAGGAAGG	CACGGCGTCTGGAATGCAGGATGAGGTCAGAGCGGTTGGCGAGGAGCAAAGGTCAGAGGAGCCAAAGCGCAGGGTGGATACTTCAGTGTCTTGGGAGGCGTTGATTTGTGTCGGATAGTCCAAGAAGAGAGCGAGGAAGG	4	WT	VKSATLSSTESTASGMQDEVRAVGEEQRSEEPKRRVDTSVSWEALICVGSSKKRARKASSSDDEGGPRTLGGDGHRAEEASKDKE	VKSATLSSTESTASGMQDEVRAVGEEQRSEEPKRRVDTSVSWEALICVGSSKKRARKASSSDDEGGPRTLGGDGHRAEEASKDKE
CACGGCGTCTGGAATGCAGGATGAGGTCAGAGCGGTTGGCGAGGAGCAAAGGTCAGAGGAGCCAAAGCGCAGGGTGGATACTTCAGTGTCTTGGGAGGCGTTGATTTGTGTCGGATCGTCCAAGAAGAGAGCGAGGAAGG	CACGGCGTCTGGAATGCAGGATGAGGTCAGAGCGGTTGGCGAGGAGCAAAGGTCAGAGGAGCCAAAGCGCAGGGTGGATACATCAGTGTCTTGGGAGGCGTTGATTTGTGTCGGATCGTCCAAGAAGAGAGCGAGGAAGG	4	WT	VKSATLSSTESTASGMQDEVRAVGEEQRSEEPKRRVDTSVSWEALICVGSSKKRARKASSSDDEGGPRTLGGDGHRAEEASKDKE	VKSATLSSTESTASGMQDEVRAVGEEQRSEEPKRRVDTSVSWEALICVGSSKKRARKASSSDDEGGPRTLGGDGHRAEEASKDKE
CACGGCGTCTGGAATGCAGGATGAGGTCAGAGCGGTTGGCGAGGAGCAAAGGTCAGAGGAGCCAAAGCGCAGGGTGGATACTTCAGTGTCTTGGGAGGCGTTGATTTGTGTCGGATCGTCCAAGAAGAGAGCGAGGAAGG	CACGGCGTCTGGAATGCAGGATGAGGTCAGAGCGGTTGGCGAGGAGCAAAGGTCAGAGGAGCCAAAGCGCAGGGTGGATACTTCAGTGTCTTGGGAGGCGTTGATTGGTGTCGGATCGTCCAAGAAGAGAGCGAGGAAGG	3	WT	VKSATLSSTESTASGMQDEVRAVGEEQRSEEPKRRVDTSVSWEALICVGSSKKRARKASSSDDEGGPRTLGGDGHRAEEASKDKE	VKSATLSSTESTASGMQDEVRAVGEEQRSEEPKRRVDTSVSWEALICVGSSKKRARKASSSDDEGGPRTLGGDGHRAEEASKDKE
CACGGCGTCTGGAATGCAGGATGAGGTCAGAGCGGTTGGCGAGGAGCAAAGGTCAGAGGAGCCAAAGCGCAGGGTGGATACTTCAGTGTCTTGGGAGGCGTTGATTTGTGTCGGATCGTCCAAGAAGAGAGCGAGGAAGG	CACGGCGTCTGGAATGCAGGATGAGGTCAGAGCGGTTGGCGAGGAGCAAAGGTCAGAGGAGCCAAAGCGCAGGGTGGATACTTCAGTGTCTTGGGAGGCGTTGATTTGTGTCGGANCGTCCAAGAAGAGAGCGAGGAAGG	3	WT	VKSATLSSTESTASGMQDEVRAVGEEQRSEEPKRRVDTSVSWEALICVGSSKKRARKASSSDDEGGPRTLGGDGHRAEEASKDKE	VKSATLSSTESTASGMQDEVRAVGEEQRSEEPKRRVDTSVSWEALICVGSSKKRARKASSSDDEGGPRTLGGDGHRAEEASKDKE
CACGGCGTCTGGAATGCAGGATGAGGTCAGAGCGGTTGGCGAGGAGCAAAGGTCAGAGGAGCCAAAGCGCAGGGTGGATACTTCAGTGTCTTGGGAGGCGTTGATTTGTGTCGGATCGTCCAAGAAGAGAGCGAGGAAGG	CACGGCGTCTGGAATGCAGGATGAGGTCAGAGCGGTTGGCGAGGAGCAAAGGTCAGAGGAGCCAAAGCGCAGGGTGGATACTTCAGTGTCTTGGGAGGCGTTGATTTGTGTCGGATCGTCCAAGAAGCGAGCGAGGAAGG	3	WT	VKSATLSSTESTASGMQDEVRAVGEEQRSEEPKRRVDTSVSWEALICVGSSKKRARKASSSDDEGGPRTLGGDGHRAEEASKDKE	VKSATLSSTESTASGMQDEVRAVGEEQRSEEPKRRVDTSVSWEALICVGSSKKRARKASSSDDEGGPRTLGGDGHRAEEASKDKE
CACGGCGTCTGGAATGCAGGATGAGGTCAGAGCGGTTGGCGAGGAGCAAAGGTCAGAGGAGCCAAAGCGCAGGGTGGATACTTCAGTGTCTTGGGAGGCGTTGATTTGTGTCGGATCGTCCAAGAAGAGAGCGAGGAAGG	TACGGCGTCTGGAATGCAGGATGAGGTCAGAGCGGTTGGCGAGGAGCAAAGGTCAGAGGAGCCAAAGCGCAGGGTGGATACTTCAGTGTCTTGGGAGGCGTTGATTTGTGTCGGATCGTCCAAGAAGAGAGCGAGGAAGG	3	WT	VKSATLSSTESTASGMQDEVRAVGEEQRSEEPKRRVDTSVSWEALICVGSSKKRARKASSSDDEGGPRTLGGDGHRAEEASKDKE	VKSATLSSTESTASGMQDEVRAVGEEQRSEEPKRRVDTSVSWEALICVGSSKKRARKASSSDDEGGPRTLGGDGHRAEEASKDKE
CACGGCGTCTGGAATGCAGGATGAGGTCAGAGCGGTTGGCGAGGAGCAAAGGTCAGAGGAGCCAAAGCGCAGGGTGGATACTTCAGTGTCTTGGGAGGCGTTGATTTGTGTCGGATCGTCCAAGAAGAGAGCGAGGAAGG	CACGGCGTCTGGGATGCATGATGAGGTCAGAGCGGTTGGCGAGGAGCAAAGGTCAGAGGAGCCAAAGCGCAGGGTGGATACTTCAGTGTCTTGGGAGGCGTTGATTTGTGTCGGATCGTCCAAGAAGAGAGCGAGGAAGG	3	WT	VKSATLSSTESTASGMQDEVRAVGEEQRSEEPKRRVDTSVSWEALICVGSSKKRARKASSSDDEGGPRTLGGDGHRAEEASKDKE	VKSATLSSTESTASGMQDEVRAVGEEQRSEEPKRRVDTSVSWEALICVGSSKKRARKASSSDDEGGPRTLGGDGHRAEEASKDKE
CACGGCGTCTGGAATGCAGGATGAGGTCAGAGCGGTTGGCGAGGAGCAAAGGTCAGAGGAGCCAAAGCGCAGGGTGGATACTTCAGTGTCTTGGGAGGCGTTGATTTGTGTCGGATCGTCCAAGAAGAGAGCGAGGAAGG	CACGGCGTCTGGAATGCAGGATGAGGTCAGAGCGGTTGGCGAGGAGCAAAGGTCAGAGGAGCCAAAGCGCAGGGTGGATACTTCAGTGTCTTGGGAGGCGTTGAGTTGTGTCGGATCGTCCAAGAAGAGAGCGAGGAAGG	3	WT	VKSATLSSTESTASGMQDEVRAVGEEQRSEEPKRRVDTSVSWEALICVGSSKKRARKASSSDDEGGPRTLGGDGHRAEEASKDKE	VKSATLSSTESTASGMQDEVRAVGEEQRSEEPKRRVDTSVSWEALICVGSSKKRARKASSSDDEGGPRTLGGDGHRAEEASKDKE
CACGGCGTCTGGAATGCAGGATGAGGTCAGAGCGGTTGGCGAGGAGCAAAGGTCAGAGGAGCCAAAGCGCAGGGTGGATACTTCAGTGTCTTGGGAGGCGTTGATTTGTGTCGGATCGTCCAAGAAGAGAGCGAGGAAGG	CACGGCGTCTGGAATGCAGGATGAGGTCAGAGCGGTTGGCGAGGAGCAAAGGTCAGAGGAGCCAAAGCGCAGGGTGGATACTTCAGTGTCTTGGGAGGCGTTGATTTGTGTCGGATCGTCCAAGAAGAGAGCGAGGACGG	3	WT	VKSATLSSTESTASGMQDEVRAVGEEQRSEEPKRRVDTSVSWEALICVGSSKKRARKASSSDDEGGPRTLGGDGHRAEEASKDKE	VKSATLSSTESTASGMQDEVRAVGEEQRSEEPKRRVDTSVSWEALICVGSSKKRARKASSSDDEGGPRTLGGDGHRAEEASKDKE
CACGGCGTCTGGAATGCAGGATGAGGTCAGAGCGGTTGGCGAGGAGCAAAGGTCAGAGGAGCCAAAGCGCAGGGTGGATACTTCAGTGTCTTGGGAGGCGTTGATTTGTGTCGGATCGTCCAAGAAGAGAGCGAGGAAGG	CACGGCGTCTGGAATGCAGGATGAGGTCAGAGCGGTTGGCGCGGAGCAAAGGTCAGAGGAGCCAAAGCGCAGGGTGGATACTTCAGTGTCTTGGGAGGCGTTGATTTGTGTCGGATCGTCCAAGAAGAGAGCGAGGAAGG	3	WT	VKSATLSSTESTASGMQDEVRAVGEEQRSEEPKRRVDTSVSWEALICVGSSKKRARKASSSDDEGGPRTLGGDGHRAEEASKDKE	VKSATLSSTESTASGMQDEVRAVGEEQRSEEPKRRVDTSVSWEALICVGSSKKRARKASSSDDEGGPRTLGGDGHRAEEASKDKE
CACGGCGTCTGGAATGCAGGATGAGGTCAGAGCGGTTGGCGAGGAGCAAAGGTCAGAGGAGCCAAAGCGCAGGGTGGATACTTCAGTGTCTTGGGAGGCGTTGATTTGTGTCGGATCGTCCAAGAAGAGAGCGAGGAAGG	CACGGCGTCTGGAATGCAGGATGAGGTCAGGGCGGTTGGCGAGGAGCAAAGGTCAGAGGAGCCAAAGCGCAGGGTGGATACTTCAGTGTCTTGGGAGGCGTTGATTTGTGTCGGATCGTCCAAGAAGAGAACGAGGAAGG	3	WT	VKSATLSSTESTASGMQDEVRAVGEEQRSEEPKRRVDTSVSWEALICVGSSKKRARKASSSDDEGGPRTLGGDGHRAEEASKDKE	VKSATLSSTESTASGMQDEVRAVGEEQRSEEPKRRVDTSVSWEALICVGSSKKRARKASSSDDEGGPRTLGGDGHRAEEASKDKE
CACGGCGTCTGGAATGCAGGATGAGGTCAGAGCGGTTGGCGAGGAGCAAAGGTCAGAGGAGCCAAAGCGCAGGGTGGATACTTCAGTGTCTTGGGAGGCGTTGATTTGTGTCGGATCGTCCAAGAAGAGAGCGAGGAAGG	CACGGCGTCTGGAATGCAGGATGAGGTCAGAGCGGTTGGCGAGGAGCAAAGGTCAGAGGAGCCAAAGCGCAGGGTGGATACTTCAGTGTCTTGGGAGGCGTTGA-TTGTGTCGGATCGTCCAAGAAGAGAGCGAGGAAGG	3	WT	VKSATLSSTESTASGMQDEVRAVGEEQRSEEPKRRVDTSVSWEALICVGSSKKRARKASSSDDEGGPRTLGGDGHRAEEASKDKE	VKSATLSSTESTASGMQDEVRAVGEEQRSEEPKRRVDTSVSWEALICVGSSKKRARKASSSDDEGGPRTLGGDGHRAEEASKDKE
CACGGCGTCTGGAATGCAGGATGAGGTCAGAGCGGTTGGCGAGGAGCAAAGGTCAGAGGAGCCAAAGCGCAGGGTGGATACTTCAGTGTCTTGGGAGGCGTTGATTTGTGTCGGATCGTCCAAGAAGAGAGCGAGGAAGG	CAGGGCGTCTGGAATGCAGGATGAGGTCAGAGCGGTTGGCGAGGAGCAAAGGTCAGAGGAGCCAAAGCGCAGGGTGGATACTTCAGTGTCTTGGGAGGCGTTGATTTGTGTCGGATCGTCCAAGAAGAGAGCGAGGAAGG	3	WT	VKSATLSSTESTASGMQDEVRAVGEEQRSEEPKRRVDTSVSWEALICVGSSKKRARKASSSDDEGGPRTLGGDGHRAEEASKDKE	VKSATLSSTESTASGMQDEVRAVGEEQRSEEPKRRVDTSVSWEALICVGSSKKRARKASSSDDEGGPRTLGGDGHRAEEASKDKE
CACGGCGTCTGGAATGCAGGATGAGGTCAGAGCGGTTGGCGAGGAGCAAAGGTCAGAGGAGCCAAAGCGCAGGGTGGATACTTCAGTGTCTTGGGAGGCGTTGATTTGTGTCGGATCGTCCAAGAAGAGAGCGAGGAAGG	CACGGCGTCTGGAATGCAGGATGAGGTCAGAGCGGTTGGCGAGGAGCAAAGGTCAGAGGAGCCAAAGCGCAGGGTGGATACTTCAGTGTCTTGGGAGGCGTTGATTTGTGTCGGATCGTCAAAGAAGAGAGCGAGGAAGG	3	WT	VKSATLSSTESTASGMQDEVRAVGEEQRSEEPKRRVDTSVSWEALICVGSSKKRARKASSSDDEGGPRTLGGDGHRAEEASKDKE	VKSATLSSTESTASGMQDEVRAVGEEQRSEEPKRRVDTSVSWEALICVGSSKKRARKASSSDDEGGPRTLGGDGHRAEEASKDKE
CACGGCGTCTGGAATGCAGGATGAGGTCAGAGCGGTTGGCGAGGAGCAAAGGTCAGAGGAGCCAAAGCGCAGGGTGGATACTTCAGTGTCTTGGGAGGCGTTGATTTGTGTCGGATCGTCCAAGAAGAGAGCGAGGAAGG	CACGGCGTCTGGAATGCAGGATGAGGTCAGAGCGGTTGGCGAGGAGCAAAGGTCAGAGGAGCCAAAGCGCAGGGTGGATACTTCAGTGTCTTGGGAGGCGTTGATTTGTGTCGGATCGTCCAATAAGAGAGCGAGGAAGG	3	WT	VKSATLSSTESTASGMQDEVRAVGEEQRSEEPKRRVDTSVSWEALICVGSSKKRARKASSSDDEGGPRTLGGDGHRAEEASKDKE	VKSATLSSTESTASGMQDEVRAVGEEQRSEEPKRRVDTSVSWEALICVGSSKKRARKASSSDDEGGPRTLGGDGHRAEEASKDKE
CACGGCGTCTGGAATGCAGGATGAGGTCAGAGCGGTTGGCGAGGAGCAAAGGTCAGAGGAGCCAAAGCGCAGGGTGGATACTTCAGTGTCTTGGGAGGCGTTGATTTGTGTCGGATCGTCCAAGAAGAGAGCGAGGAAGG	CACGGCGTCTGGAATGCAGGATGAGGTCAGAGCGGTTGGCGAGGAGCAAAGGTCAGAGGAGCCAAAGCGCAGGGTGGATACTTCAGTGTCTTGGGAGGCGTTGATTTGTTTCGGATCGTCCAAGAAGAGAGCGAGGAAGG	3	WT	VKSATLSSTESTASGMQDEVRAVGEEQRSEEPKRRVDTSVSWEALICVGSSKKRARKASSSDDEGGPRTLGGDGHRAEEASKDKE	VKSATLSSTESTASGMQDEVRAVGEEQRSEEPKRRVDTSVSWEALICVGSSKKRARKASSSDDEGGPRTLGGDGHRAEEASKDKE
CACGGCGTCTGGAATGCAGGATGAGGTCAGAGCGGTTGGCGAGGAGCAAAGGTCAGAGGAGCCAAAGCGCAGGGTGGATACTTCAGTGTCTTGGGAGGCGTTGATTTGTGTCGGATCGTCCAAGAAGAGAGCGAGGAAGG	CACGGCGTCTGGAATGCAGGATGAGGTCAGAGCGGTTGGCGAGGAGCAAAGGTCAGAGGAGCC-AAGCGCAGGGTGGATACTTCAGTGTCTTGGGAGGCGTTGATTCGTGTCGGATCGTCCAAGAAGAGAGCGAGGAAGG	3	WT	VKSATLSSTESTASGMQDEVRAVGEEQRSEEPKRRVDTSVSWEALICVGSSKKRARKASSSDDEGGPRTLGGDGHRAEEASKDKE	VKSATLSSTESTASGMQDEVRAVGEEQRSEEPKRRVDTSVSWEALICVGSSKKRARKASSSDDEGGPRTLGGDGHRAEEASKDKE
CACGGCGTCTGGAATGCAGGATGAGGTCAGAGCGGTTGGCGAGGAGCAAAGGTCAGAGGAGCCAAAGCGCAGGGTGGATACTTCAGTGTCTTGGGAGGCGTTGATTTGTGTCGGATCGTCCAAGAAGAGAGCGAGGAAGG	CACGGCGTCTGGAATGCAGGATGAGGTCAGAGCGGTTGGCGAGGAGCAAAGGTCAGAGGAGCCAAAGCGCAGGGTGGAT------------------------------------------AAGAAGAGAGCGAGGAAGG	3	WT	VKSATLSSTESTASGMQDEVRAVGEEQRSEEPKRRVDTSVSWEALICVGSSKKRARKASSSDDEGGPRTLGGDGHRAEEASKDKE	VKSATLSSTESTASGMQDEVRAVGEEQRSEEPKRRVDTSVSWEALICVGSSKKRARKASSSDDEGGPRTLGGDGHRAEEASKDKE
CACGGCGTCTGGAATGCAGGATGAGGTCAGAGCGGTTGGCGAGGAGCAAAGGTCAGAGGAGCCAAAGCGCAGGGTGGATACTTCAGTGTCTTGGGAGGCGTTGATTTGTGTCGGATCGTCCAAGAAGAGAGCGAGGAAGG	CACGGCGTCTGGAATGCAGGATGAGGACAGAGCGGTTGGCGAGGAGCAAAGGTCAGAGGAGCCAAAGCGCAGGGTGGATACTTCAGTGTCTTGGGAGGCGTTGATTTGTGTCGGATCGTCCAAGAAGAGAGCGAGGAAGG	3	WT	VKSATLSSTESTASGMQDEVRAVGEEQRSEEPKRRVDTSVSWEALICVGSSKKRARKASSSDDEGGPRTLGGDGHRAEEASKDKE	VKSATLSSTESTASGMQDEVRAVGEEQRSEEPKRRVDTSVSWEALICVGSSKKRARKASSSDDEGGPRTLGGDGHRAEEASKDKE
CACGGCGTCTGGAATGCAGGATGAGGTCAGAGCGGTTGGCGAGGAGCAAAGGTCAGAGGAGCCAAAGCGCAGGGTGGATACTTCAGTGTCTTGGGAGGCGTTGATTTGTGTCGGATCGTCCAAGAAGAGAGCGAGGAAGG	CACGGCGTCTGGAATTCAGGATGAGGTCAGAGCGGTTGGCGAGGAGCAAAGGTCAGAGGAGCCAAAGCGCAGGGTGGATACTTCAGTGTCTTGGGAGGCGTTGATTTGTGTCGGATCGTCCAAGAAGAGAGCGAGGAAGG	3	WT	VKSATLSSTESTASGMQDEVRAVGEEQRSEEPKRRVDTSVSWEALICVGSSKKRARKASSSDDEGGPRTLGGDGHRAEEASKDKE	VKSATLSSTESTASGMQDEVRAVGEEQRSEEPKRRVDTSVSWEALICVGSSKKRARKASSSDDEGGPRTLGGDGHRAEEASKDKE
CACGGCGTCTGGAATGCAGGATGAGGTCAGAGCGGTTGGCGAGGAGCAAAGGTCAGAGGAGCCAAAGCGCAGGGTGGATACTTCAGTGTCTTGGGAGGCGTTGATTTGTGTCGGATCGTCCAAGAAGAGAGCGAGGAAGG	CACGGCGTCTGGAATGCAGTATGAGGTCAGAGCGGTTGGCGAGGAGCAAAGGTCAGAGGAGCCAAAGCGCAGGGTGGATACTTCAGTGTCTTGGGAGGCGTTGATTTGTGTCGGATCGTCCAAGAAGAGAGCGAGGAAGG	3	WT	VKSATLSSTESTASGMQDEVRAVGEEQRSEEPKRRVDTSVSWEALICVGSSKKRARKASSSDDEGGPRTLGGDGHRAEEASKDKE	VKSATLSSTESTASGMQDEVRAVGEEQRSEEPKRRVDTSVSWEALICVGSSKKRARKASSSDDEGGPRTLGGDGHRAEEASKDKE
CACGGCGTCTGGAATGCAGGATGAGGTCAGAGCGGTTGGCGAGGAGCAAAGGTCAGAGGAGCCAAAGCGCAGGGTGGATACTTCAGTGTCTTGGGAGGCGTTGATTTGTGTCGGATCGTCCAAGAAGAGAGCGAGGAAGG	CACGGCGTCTGGAATGCAGGATGAGGTCAGAGCGGTTGGCGAGGAGCAAAGGTCAGAGGAGCCAAAGCGCAGGGTGGATGCTTCAGTGTCTTGGGAGGCGTTGATTTGTGTCGGATCGTCCAAGAAGAGAGCGAGGAAAG	3	WT	VKSATLSSTESTASGMQDEVRAVGEEQRSEEPKRRVDTSVSWEALICVGSSKKRARKASSSDDEGGPRTLGGDGHRAEEASKDKE	VKSATLSSTESTASGMQDEVRAVGEEQRSEEPKRRVDTSVSWEALICVGSSKKRARKASSSDDEGGPRTLGGDGHRAEEASKDKE
CACGGCGTCTGGAATGCAGGATGAGGTCAGAGCGGTTGGCGAGGAGCAAAGGTCAGAGGAGCCAAAGCGCAGGGTGGATACTTCAGTGTCTTGGGAGGCGTTGATTTGTGTCGGATCGTCCAAGAAGAGAGCGAGGAAGG	CACGGCGTCTGGAATGCAGGATGAGGTCAGAGCGGTTGGCGAGGAGCAAAGGTCAGAGGAGCCAAAGCGCAGGGTGGATACTTCAGTGTCTTGGGAGGAGTTGATTTGTGTCGGATCGTCCAAGAAGAGAGCGAGGAAGG	3	WT	VKSATLSSTESTASGMQDEVRAVGEEQRSEEPKRRVDTSVSWEALICVGSSKKRARKASSSDDEGGPRTLGGDGHRAEEASKDKE	VKSATLSSTESTASGMQDEVRAVGEEQRSEEPKRRVDTSVSWEALICVGSSKKRARKASSSDDEGGPRTLGGDGHRAEEASKDKE
CACGGCGTCTGGAATGCAGGATGAGGTCAGAGCGGTTGGCGAGGAGCAAAGGTCAGAGGAGCCAAAGCGCAGGGTGGATACTTCAGTGTCTTGGGAGGCGTTGATTTGTGTCGGATCGTCCAAGAAGAGAGCGAGGAAGG	CACGGCGTCTGGAATGCAGGATGAGGTCAGAGCGGTTGGCGAGGAGCAAAGGTCCGAGGAGCCAAAGCGCAGGGTGGATACTTCAGTGTCTTGGGAGGCGTTGATTTGTGTCGGATCGTCCAAGAAGAGAGCGAGGAAGG	3	WT	VKSATLSSTESTASGMQDEVRAVGEEQRSEEPKRRVDTSVSWEALICVGSSKKRARKASSSDDEGGPRTLGGDGHRAEEASKDKE	VKSATLSSTESTASGMQDEVRAVGEEQRSEEPKRRVDTSVSWEALICVGSSKKRARKASSSDDEGGPRTLGGDGHRAEEASKDKE
CACGGCGTCTGGAATGCAGGATGAGGTCAGAGCGGTTGGCGAGGAGCAAAGGTCAGAGGAGCCAAAGCGCAGGGTGGATACTTCAGTGTCTTGGGAGGCGTTGATTTGTGTCGGATCGTCCAAGAAGAGAGCGAGGAAGG	CACGGCGTCTGGAATGCAGGATGAGGTTAGAGTGGTTGGCGAGGAGCAAAGGTCAGAGGAGCCAAAGCGCAGGGTGGATACTTCAGTGTCTTGGGAGGCGTTGATTTGTGTCGGATCGTCCAAGAAGAGAGCGAGGAAGG	3	WT	VKSATLSSTESTASGMQDEVRAVGEEQRSEEPKRRVDTSVSWEALICVGSSKKRARKASSSDDEGGPRTLGGDGHRAEEASKDKE	VKSATLSSTESTASGMQDEVRAVGEEQRSEEPKRRVDTSVSWEALICVGSSKKRARKASSSDDEGGPRTLGGDGHRAEEASKDKE
CACGGCGTCTGGAATGCAGGATGAGGTCAGAGCGGTTGGCGAGGAGCAAAGGTCAGAGGAGCCAAAGCGCAGGGTGGATACTTCAGTGTCTTGGGAGGCGTTGATTTGTGTCGGATCGTCCAAGAAGAGAGCGAGGAAGG	CACGGCGTCTGGAATGCGGGATGAGGTCAGAGCGGTTGGCGAGGAGCAAAGGTCAGAGGAGCCGAAGCGCAGGGTGGATACTTCAGTGTCTTGGGAGGCGTTGATTTGTGTCGGATCGTCCAAGAAGAGAGCGAGGAAGG	3	WT	VKSATLSSTESTASGMQDEVRAVGEEQRSEEPKRRVDTSVSWEALICVGSSKKRARKASSSDDEGGPRTLGGDGHRAEEASKDKE	VKSATLSSTESTASGMQDEVRAVGEEQRSEEPKRRVDTSVSWEALICVGSSKKRARKASSSDDEGGPRTLGGDGHRAEEASKDKE
CACGGCGTCTGGAATGCAGGATGAGGTCAGAGCGGTTGGCGAGGAGCAAAGGTCAGAGGAGCCAAAGCGCAGGGTGGATACTTCAGTGTCTTGGGAGGCGTTGATTTGTGTCGGATCGTCCAAGAAGAGAGCGAGGAAGG	CACGGCGTCTGGAATGCAGGATGAGGTCAGAGCGGTTGGCGAGGAGCAAAGGTCAGAGGAGCC-AAGCGCAGGGTGGATACTTCAGTGTCTTGGGAGGCGTTGATTTGTGTCGGATCGTCCAAGAAGAGAGCGAGGAAGG	3	WT	VKSATLSSTESTASGMQDEVRAVGEEQRSEEPKRRVDTSVSWEALICVGSSKKRARKASSSDDEGGPRTLGGDGHRAEEASKDKE	VKSATLSSTESTASGMQDEVRAVGEEQRSEEPKRRVDTSVSWEALICVGSSKKRARKASSSDDEGGPRTLGGDGHRAEEASKDKE
CACGGCGTCTGGAATGCAGGATGAGGTCAGAGCGGTTGGCGAGGAGCAAAGGTCAGAGGAGCCAAAGCGCAGGGTGGATACTTCAGTGTCTTGGGAGGCGTTGATTTGTGTCGGATCGTCCAAGAAGAGAGCGAGGAAGG	CACGGCGTCTGGAATGCAGGATGAGGTCAGAGCGGTTGGCGAGGAGCAAAGGTCAGAGGAGCCAAAGCGCAGGGTGGATACTTCAGTGTCTTGGGAGGCGTTGATTTGTGTCGGATCGTCCAAGAATAGAGCGAGGAAGG	3	WT	VKSATLSSTESTASGMQDEVRAVGEEQRSEEPKRRVDTSVSWEALICVGSSKKRARKASSSDDEGGPRTLGGDGHRAEEASKDKE	VKSATLSSTESTASGMQDEVRAVGEEQRSEEPKRRVDTSVSWEALICVGSSKKRARKASSSDDEGGPRTLGGDGHRAEEASKDKE
CACGGCGTCTGGAATGCAGGATGAGGTCAGAGCGGTTGGCGAGGAGCAAAGGTCAGAGGAGCCAAAGCGCAGGGTGGATACTTCAGTGTCTTGGGAGGCGTTGATTTGTGTCGGATCGTCCAAGAAGAGAGCGAGGAAGG	CACGGCGTCTGGAATGCAGGATGAGGTCAGAGCGGTTGGCGAGGAGCAAAGGTCAGAGGAGCCAAAGCGCAGGGGGGATACTTCAGTGTCTTGGGAGGCGTTGATTTGTGTCGGATCGTCCAAGAAGAGAGCGAGGAAGG	3	WT	VKSATLSSTESTASGMQDEVRAVGEEQRSEEPKRRVDTSVSWEALICVGSSKKRARKASSSDDEGGPRTLGGDGHRAEEASKDKE	VKSATLSSTESTASGMQDEVRAVGEEQRSEEPKRRVDTSVSWEALICVGSSKKRARKASSSDDEGGPRTLGGDGHRAEEASKDKE
CACGGCGTCTGGAATGCAGGATGAGGTCAGAGCGGTTGGCGAGGAGCAAAGGTCAGAGGAGCCAAAGCGCAGGGTGGATACTTCAGTGTCTTGGGAGGCGTTGATTTGTGTCGGATCGTCCAAGAAGAGAGCGAGGAAGG	CACGGCGTCTGGAATGCAGGATGAGGTCAGAGCGGTTGGCGAGGAGCAAAGGTCAGAGGAGCCAAAGCGCAGGGTGGCTACTTCAGTGTCTTGGGAGGCGTTGATTTGTGTCGGATCGTCCAAGAAGAGAGCGAGGAAGG	3	WT	VKSATLSSTESTASGMQDEVRAVGEEQRSEEPKRRVDTSVSWEALICVGSSKKRARKASSSDDEGGPRTLGGDGHRAEEASKDKE	VKSATLSSTESTASGMQDEVRAVGEEQRSEEPKRRVDTSVSWEALICVGSSKKRARKASSSDDEGGPRTLGGDGHRAEEASKDKE
CACGGCGTCTGGAATGCAGGATGAGGTCAGAGCGGTTGGCGAGGAGCAAAGGTCAGAGGAGCCAAAGCGCAGGGTGGATACTTCAGTGTCTTGGGAGGCGTTGATTTGTGTCGGATCGTCCAAGAAGAGAGCGAGGAAGG	CACGGCGTCTGGAATGCAGGATGAGGTCAGAGCGGTTGGCGGGGAGCAAAGGTCAGAGGAGCCAAAGCGCAGGGTGGATACTTCAGTGTCTTGGGAGGCGTTGATTTGTGTCGGATCGTCCAAGAAGAGAGCGAGGATGG	3	WT	VKSATLSSTESTASGMQDEVRAVGEEQRSEEPKRRVDTSVSWEALICVGSSKKRARKASSSDDEGGPRTLGGDGHRAEEASKDKE	VKSATLSSTESTASGMQDEVRAVGEEQRSEEPKRRVDTSVSWEALICVGSSKKRARKASSSDDEGGPRTLGGDGHRAEEASKDKE
CACGGCGTCTGGAATGCAGGATGAGGTCAGAGCGGTTGGCGAGGAGCAAAGGTCAGAGGAGCCAAAGCGCAGGGTGGATACTTCAGTGTCTTGGGAGGCGTTGATTTGTGTCGGATCGTCCAAGAAGAGAGCGAGGAAGG	CACGGCGTCTGGAATGCAGGATGAGGTCAGAGCGGTTGGCGAGGAGCAAAGGTCAGAGGAGCCAAAGCGCAGGGT-GATACTTCAGTGTCTTGGGAGGCGTTGATTTGTGTCGGATCGTCCAAGAAGAGAGCGAGGAAGG	3	WT	VKSATLSSTESTASGMQDEVRAVGEEQRSEEPKRRVDTSVSWEALICVGSSKKRARKASSSDDEGGPRTLGGDGHRAEEASKDKE	VKSATLSSTESTASGMQDEVRAVGEEQRSEEPKRRVDTSVSWEALICVGSSKKRARKASSSDDEGGPRTLGGDGHRAEEASKDKE
CACGGCGTCTGGAATGCAGGATGAGGTCAGAGCGGTTGGCGAGGAGCAAAGGTCAGAGGAGCCAAAGCGCAGGGTGGATACTTCAGTGTCTTGGGAGGCGTTGATTTGTGTCGGATCGTCCAAGAAGAGAGCGAGGAAGG	CACGGCGTCTGGAATGCAGGATGAGGTCAGAGCGGTTGGCGAGGAGCAAAGGTCAGAGGAGCCAAAGCGCAGGGTGGATACTTCAGTGTCTTGGGAGGCGTTGATTTGTGTCGGATCGTCCCAGAAGAGAGCGAGGAAGG	3	WT	VKSATLSSTESTASGMQDEVRAVGEEQRSEEPKRRVDTSVSWEALICVGSSKKRARKASSSDDEGGPRTLGGDGHRAEEASKDKE	VKSATLSSTESTASGMQDEVRAVGEEQRSEEPKRRVDTSVSWEALICVGSSKKRARKASSSDDEGGPRTLGGDGHRAEEASKDKE
CACGGCGTCTGGAATGCAGGATGAGGTCAGAGCGGTTGGCGAGGAGCAAAGGTCAGAGGAGCCAAAGCGCAGGGTGGATACTTCAGTGTCTTGGGAGGCGTTGATTTGTGTCGGATCGTCCAAGAAGAGAGCGAGGAAGG	CACGGCGTCTGGAATGCAGGATGAGGTCAGAGCGGTTGGCGAGGAGCAAAGGTCAGAGGAGCCAAAGCGCAGGGTGGATACTTCAGTGTATTGGGAGGCGTTGATTTGTGTCGGATCGTCCAAGAAGAGAGCGAGGAAGG	3	WT	VKSATLSSTESTASGMQDEVRAVGEEQRSEEPKRRVDTSVSWEALICVGSSKKRARKASSSDDEGGPRTLGGDGHRAEEASKDKE	VKSATLSSTESTASGMQDEVRAVGEEQRSEEPKRRVDTSVSWEALICVGSSKKRARKASSSDDEGGPRTLGGDGHRAEEASKDKE
CACGGCGTCTGGAATGCAGGATGAGGTCAGAGCGGTTGGCGAGGAGCAAAGGTCAGAGGAGCCAAAGCGCAGGGTGGATACTTCAGTGTCTTGGGAGGCGTTGATTTGTGTCGGATCGTCCAAGAAGAGAGCGAGGAAGG	CACGGCGTCTGGAATGCAGGATGCGGTCAGAGCGGTTGGCGAGGAGCAAAGGTCAGAGGAGCCAAAGCGCAGGGTGGATACTTCAGTGTCTTGGGAGGCGTTGATTTGTGTCGGATCGTCCAAGAAGAGAGCGAGGAAGG	3	WT	VKSATLSSTESTASGMQDEVRAVGEEQRSEEPKRRVDTSVSWEALICVGSSKKRARKASSSDDEGGPRTLGGDGHRAEEASKDKE	VKSATLSSTESTASGMQDEVRAVGEEQRSEEPKRRVDTSVSWEALICVGSSKKRARKASSSDDEGGPRTLGGDGHRAEEASKDKE
CACGGCGTCTGGAATGCAGGATGAGGTCAGAGCGGTTGGCGAGGAGCAAAGGTCAGAGGAGCCAAAGCGCAGGGTGGATACTTCAGTGTCTTGGGAGGCGTTGATTTGTGTCGGATCGTCCAAGAAGAGAGCGAGGAAGG	CACGGCGTCTGGAATGCAGGATGAGGTCAGAGCGGTTGGCGAGGAGCAAAGGTCAGAGGAGCCAAAGCGCAGGGTGGATACTTCAGTGTCTTGGGAGGCTTTGATTTGTGTCGGATCGTCCAAGAAGAGAGCGAGGAAGG	3	WT	VKSATLSSTESTASGMQDEVRAVGEEQRSEEPKRRVDTSVSWEALICVGSSKKRARKASSSDDEGGPRTLGGDGHRAEEASKDKE	VKSATLSSTESTASGMQDEVRAVGEEQRSEEPKRRVDTSVSWEALICVGSSKKRARKASSSDDEGGPRTLGGDGHRAEEASKDKE
CACGGCGTCTGGAATGCAGGATGAGGTCAGAGCGGTTGGCGAGGAGCAAAGGTCAGAGGAGCCAAAGCGCAGGGTGGATACTTCAGTGTCTTGGGAGGCGTTGATTTGTGTCGGATCGTCCAAGAAGAGAGCGAGGAAGG	CACGGCGTCTGGAATGCAGGATGAGGTCAGAGCGGTTGGCGAGGAGCAGAGGTCTGAGGAGCCAAAGCGCAGGGTGGATACTTCAGTGTCTTGGGAGGCGTTGATTTGTGTCGGATCGTCCAAGAAGAGAGCGAGGAAGG	3	WT	VKSATLSSTESTASGMQDEVRAVGEEQRSEEPKRRVDTSVSWEALICVGSSKKRARKASSSDDEGGPRTLGGDGHRAEEASKDKE	VKSATLSSTESTASGMQDEVRAVGEEQRSEEPKRRVDTSVSWEALICVGSSKKRARKASSSDDEGGPRTLGGDGHRAEEASKDKE
CACGGCGTCTGGAATGCAGGATGAGGTCAGAGCGGTTGGCGAGGAGCAAAGGTCAGAGGAGCCAAAGCGCAGGGTGGATACTTCAGTGTCTTGGGAGGCGTTGATTTGTGTCGGATCGTCCAAGAAGAGAGCGAGGAAGG	CACGGCGTCTGGAATGCAGGATGAGGTCAGAGCGGTTGGCGAGGAGCAAAGGTCAGAGGAGCCAAAGCGCAGGGTGGATACTTCAGTGTCTTGGGAGGCGTTGATTTGTGTCGGATCGGCCAAGAAGAGAGCGAGGAAGG	3	WT	VKSATLSSTESTASGMQDEVRAVGEEQRSEEPKRRVDTSVSWEALICVGSSKKRARKASSSDDEGGPRTLGGDGHRAEEASKDKE	VKSATLSSTESTASGMQDEVRAVGEEQRSEEPKRRVDTSVSWEALICVGSSKKRARKASSSDDEGGPRTLGGDGHRAEEASKDKE
CACGGCGTCTGGAATGCAGGATGAGGTCAGAGCGGTTGGCGAGGAGCAAAGGTCAGAGGAGCCAAAGCGCAGGGTGGATACTTCAGTGTCTTGGGAGGCGTTGATTTGTGTCGGATCGTCCAAGAAGAGAGCGAGGAAGG	CACGGCGTCTGGAATGCAGGATGAGGTCAGAGCGGTTGGCGAGGAGCAAAGGTCAGAGGAGCCAAAGCGCAGGGTGGATACTTCAGTGTCTAGGGAGGCGTTGATTTGTGTCGGATCGTCCAAGAAGAGAGCGAGGAAGG	3	WT	VKSATLSSTESTASGMQDEVRAVGEEQRSEEPKRRVDTSVSWEALICVGSSKKRARKASSSDDEGGPRTLGGDGHRAEEASKDKE	VKSATLSSTESTASGMQDEVRAVGEEQRSEEPKRRVDTSVSWEALICVGSSKKRARKASSSDDEGGPRTLGGDGHRAEEASKDKE
CACGGCGTCTGGAATGCAGGATGAGGTCAGAGCGGTTGGCGAGGAGCAAAGGTCAGAGGAGCCAAAGCGCAGGGTGGATACTTCAGTGTCTTGGGAGGCGTTGATTTGTGTCGGATCGTCCAAGAAGAGAGCGAGGAAGG	CACGGCGTCTGGAATGCAGGATGAGGTCAGAGCGGTCGGCGAGGAGCAAAGGTCAGAGGAGCCAAAGCGCAGGGTGGATACTTCAGTGTCTTGGGAGGCGTTGATTTGTGTCGAATCGTCCAAGAAGAGAGCGAGGAAGG	3	WT	VKSATLSSTESTASGMQDEVRAVGEEQRSEEPKRRVDTSVSWEALICVGSSKKRARKASSSDDEGGPRTLGGDGHRAEEASKDKE	VKSATLSSTESTASGMQDEVRAVGEEQRSEEPKRRVDTSVSWEALICVGSSKKRARKASSSDDEGGPRTLGGDGHRAEEASKDKE
CACGGCGTCTGGAATGCAGGATGAGGTCAGAGCGGTTGGCGAGGAGCAAAGGTCAGAGGAGCCAAAGCGCAGGGTGGATACTTCAGTGTCTTGGGAGGCGTTGATTTGTGTCGGATCGTCCAAGAAGAGAGCGAGGAAGG	CACGGCGTCTGGAATGCAGGATGAGGTCAGAGCGGTTGGCGAGGAGCAAAGGTCAGAGGAGCCAAAGCGCAGGGTGGATACTTCAGTGTCTTGGGAGGCGTTGATTTGTGTCGGATCCTCCAAGAAGAGAGCGAGGAAGG	3	WT	VKSATLSSTESTASGMQDEVRAVGEEQRSEEPKRRVDTSVSWEALICVGSSKKRARKASSSDDEGGPRTLGGDGHRAEEASKDKE	VKSATLSSTESTASGMQDEVRAVGEEQRSEEPKRRVDTSVSWEALICVGSSKKRARKASSSDDEGGPRTLGGDGHRAEEASKDKE
CACGGCGTCTGGAATGCAGGATGAGGTCAGAGCGGTTGGCGAGGAGCAAAGGTCAGAGGAGCCAAAGCGCAGGGTGGATACTTCAGTGTCTTGGGAGGCGTTGATTTGTGTCGGATCGTCCAAGAAGAGAGCGAGGAAGG	CACGGCGTCTGGAATGCAGGATGGGGTCAGAGCGGTTGGCGAGGAGCAGAGGTCAGAGGAGCCAAAGCGCAGGGTGGATACTTCAGTGTCTTGGGAGGCGTTGATTTGTGTCGGATCGTCCAAGAAGAGAGCGAGGAAGG	3	WT	VKSATLSSTESTASGMQDEVRAVGEEQRSEEPKRRVDTSVSWEALICVGSSKKRARKASSSDDEGGPRTLGGDGHRAEEASKDKE	VKSATLSSTESTASGMQDEVRAVGEEQRSEEPKRRVDTSVSWEALICVGSSKKRARKASSSDDEGGPRTLGGDGHRAEEASKDKE
CACGGCGTCTGGAATGCAGGATGAGGTCAGAGCGGTTGGCGAGGAGCAAAGGTCAGAGGAGCCAAAGCGCAGGGTGGATACTTCAGTGTCTTGGGAGGCGTTGATTTGTGTCGGATCGTCCAAGAAGAGAGCGAGGAAGG	CACGGCGTCTGGAATGCAGGATGAGGTCAGAGCGGTTGGCGAGGAGCAAAGGTCAGAGGGGCCAAAGCGCAGGGTGGATACTTCAGTGTCTTGGGAGGCGTTGATTTGTGTCGGATCGTCCAAGAAGAGAGCGAGGAGGG	3	WT	VKSATLSSTESTASGMQDEVRAVGEEQRSEEPKRRVDTSVSWEALICVGSSKKRARKASSSDDEGGPRTLGGDGHRAEEASKDKE	VKSATLSSTESTASGMQDEVRAVGEEQRSEEPKRRVDTSVSWEALICVGSSKKRARKASSSDDEGGPRTLGGDGHRAEEASKDKE
CACGGCGTCTGGAATGCAGGATGAGGTCAGAGCGGTTGGCGAGGAGCAAAGGTCAGAGGAGCCAAAGCGCAGGGTGGATACTTCAGTGTCTTGGGAGGCGTTGATTTGTGTCGGATCGTCCAAGAAGAGAGCGAGGAAGG	CACGGCGTCTGGAATGCAGGATGAGGTCAGAGCGGTTGGCGAGGAGCAAAGGTCAGAGGAGCCAAAGCGCAGGGTGGATACCTCAGTGTCTTGGGAGGCGTTGATTTGTGTCGGATCGTCCAAGAAGAGAGCGAGGGAGG	3	WT	VKSATLSSTESTASGMQDEVRAVGEEQRSEEPKRRVDTSVSWEALICVGSSKKRARKASSSDDEGGPRTLGGDGHRAEEASKDKE	VKSATLSSTESTASGMQDEVRAVGEEQRSEEPKRRVDTSVSWEALICVGSSKKRARKASSSDDEGGPRTLGGDGHRAEEASKDKE
CACGGCGTCTGGAATGCAGGATGAGGTCAGAGCGGTTGGCGAGGAGCAAAGGTCAGAGGAGCCAAAGCGCAGGGTGGATACTTCAGTGTCTTGGGAGGCGTTGATTTGTGTCGGATCGTCCAAGAAGAGAGCGAGGAAGG	CACGGCGTCTGGAATGCAGGATGAGGTCAGAGCGGTTGGCGAGGAGCAAAGGTCAGAGGAGCCAAAGCGCAGGGTGGATACTTCAGTGTCTTGGGAGGCGTTGATTTGTGTAGGATCGTCCAAGAAGAGAGCGAGGAAGG	2	WT	VKSATLSSTESTASGMQDEVRAVGEEQRSEEPKRRVDTSVSWEALICVGSSKKRARKASSSDDEGGPRTLGGDGHRAEEASKDKE	VKSATLSSTESTASGMQDEVRAVGEEQRSEEPKRRVDTSVSWEALICVGSSKKRARKASSSDDEGGPRTLGGDGHRAEEASKDKE
CACGGCGTCTGGAATGCAGGATGAGGTCAGAGCGGTTGGCGAGGAGCAAAGGTCAGAGGAGCCAAAGCGCAGGGTGGATACTTCAGTGTCTTGGGAGGCGTTGATTTGTGTCGGATCGTCCAAGAAGAGAGCGAGGAAGG	CACGGCGTCTGGAATGCAGGATGAGGTCAGAGCGGTTGGCGAGGAGCAAAGGTCAGAGGAGCCAAAGCGCAGGGTGGATACTTCAGTGTCTTGGGAGGCGTTGATTTTTGTCGGATCGTCCAAGAAGAGAGCGAGGAAGG	2	WT	VKSATLSSTESTASGMQDEVRAVGEEQRSEEPKRRVDTSVSWEALICVGSSKKRARKASSSDDEGGPRTLGGDGHRAEEASKDKE	VKSATLSSTESTASGMQDEVRAVGEEQRSEEPKRRVDTSVSWEALICVGSSKKRARKASSSDDEGGPRTLGGDGHRAEEASKDKE
CACGGCGTCTGGAATGCAGGATGAGGTCAGAGCGGTTGGCGAGGAGCAAAGGTCAGAGGAGCCAAAGCGCAGGGTGGATACTTCAGTGTCTTGGGAGGCGTTGATTTGTGTCGGATCGTCCAAGAAGAGAGCGAGGAAGG	CACGGCGTCTGGAATGCAGGATGAGGTCAGAGCGGTTGGCGAGGAGCAAAGGTCAGAGGAGCCAAAGCGCAGGGTGGATACTTCAGTGTCTTGGGAGGCGTTGATTTGTGTCGGACCGTCCAAGAAGGGAGCGAGGAAGG	2	WT	VKSATLSSTESTASGMQDEVRAVGEEQRSEEPKRRVDTSVSWEALICVGSSKKRARKASSSDDEGGPRTLGGDGHRAEEASKDKE	VKSATLSSTESTASGMQDEVRAVGEEQRSEEPKRRVDTSVSWEALICVGSSKKRARKASSSDDEGGPRTLGGDGHRAEEASKDKE
CACGGCGTCTGGAATGCAGGATGAGGTCAGAGCGGTTGGCGAGGAGCAAAGGTCAGAGGAGCCAAAGCGCAGGGTGGATACTTCAGTGTCTTGGGAGGCGTTGATTTGTGTCGGATCGTCCAAGAAGAGAGCGAGGAAGG	CACGGCGTCTGGAATGCAGGATGAGGTCAGAGCGGTTGGCGAGGAGCAAAGGTCAGAGGAGCCAAGGCGCAGGGTGGATACTTCAGTGTCTTGGGAGGCGTTGATTTGTGTCGGATCGTCCAAGAAGAGAGCGAGGAGGG	2	WT	VKSATLSSTESTASGMQDEVRAVGEEQRSEEPKRRVDTSVSWEALICVGSSKKRARKASSSDDEGGPRTLGGDGHRAEEASKDKE	VKSATLSSTESTASGMQDEVRAVGEEQRSEEPKRRVDTSVSWEALICVGSSKKRARKASSSDDEGGPRTLGGDGHRAEEASKDKE
CACGGCGTCTGGAATGCAGGATGAGGTCAGAGCGGTTGGCGAGGAGCAAAGGTCAGAGGAGCCAAAGCGCAGGGTGGATACTTCAGTGTCTTGGGAGGCGTTGATTTGTGTCGGATCGTCCAAGAAGAGAGCGAGGAAGG	CACGGCGTCTGGAATGCAGGATGAGGTCAGAGCGGTTGGCGAGGAGCAAAGGTCAGAGGAGCCAAAGCGCAGGGTGGATACTTCAGTGTCTTGGGAGGCGTTGATTTGTGTCGGAGCGTCCAAGAAGAGAGCGAGGAAGG	2	WT	VKSATLSSTESTASGMQDEVRAVGEEQRSEEPKRRVDTSVSWEALICVGSSKKRARKASSSDDEGGPRTLGGDGHRAEEASKDKE	VKSATLSSTESTASGMQDEVRAVGEEQRSEEPKRRVDTSVSWEALICVGSSKKRARKASSSDDEGGPRTLGGDGHRAEEASKDKE
CACGGCGTCTGGAATGCAGGATGAGGTCAGAGCGGTTGGCGAGGAGCAAAGGTCAGAGGAGCCAAAGCGCAGGGTGGATACTTCAGTGTCTTGGGAGGCGTTGATTTGTGTCGGATCGTCCAAGAAGAGAGCGAGGAAGG	CACGGCGTCTGGAATGCAGGATGAGGTCAGAGCGGTTGGCGAGGAGCAAAGGTCAGAGGCGCCAAAGCGCAGGGTGGATACTTCAGTGTCTTGGGAGGCGTTGATTTGTGTCGGATCGTCCAAGAAGAGAGCGAGGAAGG	2	WT	VKSATLSSTESTASGMQDEVRAVGEEQRSEEPKRRVDTSVSWEALICVGSSKKRARKASSSDDEGGPRTLGGDGHRAEEASKDKE	VKSATLSSTESTASGMQDEVRAVGEEQRSEEPKRRVDTSVSWEALICVGSSKKRARKASSSDDEGGPRTLGGDGHRAEEASKDKE
CACGGCGTCTGGAATGCAGGATGAGGTCAGAGCGGTTGGCGAGGAGCAAAGGTCAGAGGAGCCAAAGCGCAGGGTGGATACTTCAGTGTCTTGGGAGGCGTTGATTTGTGTCGGATCGTCCAAGAAGAGAGCGAGGAAGG	CACGGCGTCTGGAATGCAAGATGAGGTCAGAGCGGTTGGCGAGGAGCAAAGGTCAGAGGAGCCAAAGCGCAGGGTGGATACTTCAGTGTCTTGGGAGGCGTTGATTTGTGTTGGATCGTCCAAGAAGAGAGCGAGGAAGG	2	WT	VKSATLSSTESTASGMQDEVRAVGEEQRSEEPKRRVDTSVSWEALICVGSSKKRARKASSSDDEGGPRTLGGDGHRAEEASKDKE	VKSATLSSTESTASGMQDEVRAVGEEQRSEEPKRRVDTSVSWEALICVGSSKKRARKASSSDDEGGPRTLGGDGHRAEEASKDKE
CACGGCGTCTGGAATGCAGGATGAGGTCAGAGCGGTTGGCGAGGAGCAAAGGTCAGAGGAGCCAAAGCGCAGGGTGGATACTTCAGTGTCTTGGGAGGCGTTGATTTGTGTCGGATCGTCCAAGAAGAGAGCGAGGAAGG	CACGGCGTCTGGAATGCAGGATGAGGTCAGAGCGGTTGGCGAGGAGCCAAGGTCAGAGGAGCCAAAGCGCAGGGTGGATACTTCAGTGTCTTGGGAGGCGTTGATTTGTGTCGGATCGTCCAAGAAGAGAGCGAGGAAGG	2	WT	VKSATLSSTESTASGMQDEVRAVGEEQRSEEPKRRVDTSVSWEALICVGSSKKRARKASSSDDEGGPRTLGGDGHRAEEASKDKE	VKSATLSSTESTASGMQDEVRAVGEEQRSEEPKRRVDTSVSWEALICVGSSKKRARKASSSDDEGGPRTLGGDGHRAEEASKDKE
CACGGCGTCTGGAATGCAGGATGAGGTCAGAGCGGTTGGCGAGGAGCAAAGGTCAGAGGAGCCAAAGCGCAGGGTGGATACTTCAGTGTCTTGGGAGGCGTTGATTTGTGTCGGATCGTCCAAGAAGAGAGCGAGGAAGG	CACGGCGTCTGGAATGCAGGATGAGGTCAGAGCGGTTGGCGAGGAGCAAAGGACAGAGGAGCCAAAGCGCAGGGTGGATACTTCAGTGTCTTGGGAGGCGTTGATTTGTGTCGGATCGTCCAAGAAGAGAGCGAGGAAGG	2	WT	VKSATLSSTESTASGMQDEVRAVGEEQRSEEPKRRVDTSVSWEALICVGSSKKRARKASSSDDEGGPRTLGGDGHRAEEASKDKE	VKSATLSSTESTASGMQDEVRAVGEEQRSEEPKRRVDTSVSWEALICVGSSKKRARKASSSDDEGGPRTLGGDGHRAEEASKDKE
CACGGCGTCTGGAATGCAGGATGAGGTCAGAGCGGTTGGCGAGGAGCAAAGGTCAGAGGAGCCAAAGCGCAGGGTGGATACTTCAGTGTCTTGGGAGGCGTTGATTTGTGTCGGATCGTCCAAGAAGAGAGCGAGGAAGG	CACGCCGTCTGGAATGCAGGATGAGGTCAGAGCGGTTGGCGAGGAGCAAAGGTCAGAGGAGCCAAAGCGCAGGGTGGATACTTCAGTGTCTTGGGAGGCGTTGATTTGTGTCGGATCGTCCAAGAAGAGAGCGAGGAAGG	2	WT	VKSATLSSTESTASGMQDEVRAVGEEQRSEEPKRRVDTSVSWEALICVGSSKKRARKASSSDDEGGPRTLGGDGHRAEEASKDKE	VKSATLSSTESTASGMQDEVRAVGEEQRSEEPKRRVDTSVSWEALICVGSSKKRARKASSSDDEGGPRTLGGDGHRAEEASKDKE
CACGGCGTCTGGAATGCAGGATGAGGTCAGAGCGGTTGGCGAGGAGCAAAGGTCAGAGGAGCCAAAGCGCAGGGTGGATACTTCAGTGTCTTGGGAGGCGTTGATTTGTGTCGGATCGTCCAAGAAGAGAGCGAGGAAGG	CACGGCGTCTGGAATGGAGGATGAGGTCAGAGCGGTTGGCGAGGAGCAAAGGTCAGAGGAGCCAAAGCGCAGGGTGGATACTTCAGTGTCTTGGGAGGCGTTGATTTGTGTCGGATCGTCCAAGAAGAGAGCGAGGAAGG	2	WT	VKSATLSSTESTASGMQDEVRAVGEEQRSEEPKRRVDTSVSWEALICVGSSKKRARKASSSDDEGGPRTLGGDGHRAEEASKDKE	VKSATLSSTESTASGMQDEVRAVGEEQRSEEPKRRVDTSVSWEALICVGSSKKRARKASSSDDEGGPRTLGGDGHRAEEASKDKE
CACGGCGTCTGGAATGCAGGATGAGGTCAGAGCGGTTGGCGAGGAGCAAAGGTCAGAGGAGCCAAAGCGCAGGGTGGATACTTCAGTGTCTTGGGAGGCGTTGATTTGTGTCGGATCGTCCAAGAAGAGAGCGAGGAAGG	CACGGCGTCTGGAATGCAGGATGAGGTCAGAGCGGTTGGCGAGGAGCAAAGGTCAGAGGAGCCAAAGCGCAGGGTGGATACTTCAGTGTCTTGGGAGGCGTTGATTTGTGTCGGATCGTCCAAGAAGAGATCGAGGAAGG	2	WT	VKSATLSSTESTASGMQDEVRAVGEEQRSEEPKRRVDTSVSWEALICVGSSKKRARKASSSDDEGGPRTLGGDGHRAEEASKDKE	VKSATLSSTESTASGMQDEVRAVGEEQRSEEPKRRVDTSVSWEALICVGSSKKRARKASSSDDEGGPRTLGGDGHRAEEASKDKE
CACGGCGTCTGGAATGCAGGATGAGGTCAGAGCGGTTGGCGAGGAGCAAAGGTCAGAGGAGCCAAAGCGCAGGGTGGATACTTCAGTGTCTTGGGAGGCGTTGATTTGTGTCGGATCGTCCAAGAAGAGAGCGAGGAAGG	CACGGCGTCTGGAATTCAGGATGAGGTCAGAGCGGTTGACGAGGAGCAAAGGTCAGAGGAGCCAAAGCGCAGGGTGGATACTTCAGTGTCTTGGGAGGCGTTGATTTGTGTCGGATCGTCCAAGAAGAGAGCGAGGAAGG	2	WT	VKSATLSSTESTASGMQDEVRAVGEEQRSEEPKRRVDTSVSWEALICVGSSKKRARKASSSDDEGGPRTLGGDGHRAEEASKDKE	VKSATLSSTESTASGMQDEVRAVGEEQRSEEPKRRVDTSVSWEALICVGSSKKRARKASSSDDEGGPRTLGGDGHRAEEASKDKE
CACGGCGTCTGGAATGCAGGATGAGGTCAGAGCGGTTGGCGAGGAGCAAAGGTCAGAGGAGCCAAAGCGCAGGGTGGATACTTCAGTGTCTTGGGAGGCGTTGATTTGTGTCGGATCGTCCAAGAAGAGAGCGAGGAAGG	CACGGCGTATGGAATGCAGGATGAGGTCAGAGCGGTTGGCGAGGAGCAAAGGTCAGAGGAGCCAAAGCGCAGGGTGGATACTTCAGTGTCTTGGGAGGCGTTGATTTGTGTCGGATCGTCCAAGAAGAGAGCGAGGAAGG	2	WT	VKSATLSSTESTASGMQDEVRAVGEEQRSEEPKRRVDTSVSWEALICVGSSKKRARKASSSDDEGGPRTLGGDGHRAEEASKDKE	VKSATLSSTESTASGMQDEVRAVGEEQRSEEPKRRVDTSVSWEALICVGSSKKRARKASSSDDEGGPRTLGGDGHRAEEASKDKE
CACGGCGTCTGGAATGCAGGATGAGGTCAGAGCGGTTGGCGAGGAGCAAAGGTCAGAGGAGCCAAAGCGCAGGGTGGATACTTCAGTGTCTTGGGAGGCGTTGATTTGTGTCGGATCGTCCAAGAAGAGAGCGAGGAAGG	CACGGCGTCTGGAATGCAGGATGAGGTCAGAGCGGTTGGCGAGGAGCAAAGGTCAGAGGAGCCAAAGCGCAGGGTGGATACTTCAGTGTCTTGGGAGGCGTAGATTTGTGTCGGATCGTCCAAGAAGAGAGCGAGGAAGG	2	WT	VKSATLSSTESTASGMQDEVRAVGEEQRSEEPKRRVDTSVSWEALICVGSSKKRARKASSSDDEGGPRTLGGDGHRAEEASKDKE	VKSATLSSTESTASGMQDEVRAVGEEQRSEEPKRRVDTSVSWEALICVGSSKKRARKASSSDDEGGPRTLGGDGHRAEEASKDKE
CACGGCGTCTGGAATGCAGGATGAGGTCAGAGCGGTTGGCGAGGAGCAAAGGTCAGAGGAGCCAAAGCGCAGGGTGGATACTTCAGTGTCTTGGGAGGCGTTGATTTGTGTCGGATCGTCCAAGAAGAGAGCGAGGAAGG	CACGGCGTCTGGAATGCAGGATGAGGTCAGAGCGGTTGGCGAGGAGCAAAGGTCGGAGGAGCCAAAGCGCAGGGTGGATACTTCAGTGTCTTGGGAGGCGTTGATTTGTGTCAGATCGTCCAAGAAGAGAGCGAGGAAGG	2	WT	VKSATLSSTESTASGMQDEVRAVGEEQRSEEPKRRVDTSVSWEALICVGSSKKRARKASSSDDEGGPRTLGGDGHRAEEASKDKE	VKSATLSSTESTASGMQDEVRAVGEEQRSEEPKRRVDTSVSWEALICVGSSKKRARKASSSDDEGGPRTLGGDGHRAEEASKDKE
CACGGCGTCTGGAATGCAGGATGAGGTCAGAGCGGTTGGCGAGGAGCAAAGGTCAGAGGAGCCAAAGCGCAGGGTGGATACTTCAGTGTCTTGGGAGGCGTTGATTTGTGTCGGATCGTCCAAGAAGAGAGCGAGGAAGG	CACGGCGTCTGGAATGCAGGATGAGGTCAGAGCGGTTGGCGAGGAGCAAAGGTCAGAGGAGCCAAAGCGCAGGGTGGATACTTCAGTGTCTTGGGAGGCGTTGCTTTGTGTCGGATCGTCCAAGAAGAGAGCGAGGAAGG	2	WT	VKSATLSSTESTASGMQDEVRAVGEEQRSEEPKRRVDTSVSWEALICVGSSKKRARKASSSDDEGGPRTLGGDGHRAEEASKDKE	VKSATLSSTESTASGMQDEVRAVGEEQRSEEPKRRVDTSVSWEALICVGSSKKRARKASSSDDEGGPRTLGGDGHRAEEASKDKE
CACGGCGTCTGGAATGCAGGATGAGGTCAGAGCGGTTGGCGAGGAGCAAAGGTCAGAGGAGCCAAAGCGCAGGGTGGATACTTCAGTGTCTTGGGAGGCGTTGATTTGTGTCGGATCGTCCAAGAAGAGAGCGAGGAAGG	CACGGCGTCTGGAATGCAGGATGAGATCAGAGCGGTTGGCGAGGGGCAAAGGTCAGAGGAGCCAAAGCGCAGGGTGGATACTTCAGTGTCTTGGGAGGCGTTGATTTGTGTCGGATCGTCCAAGAAGAGAGCGAGGAAGG	2	WT	VKSATLSSTESTASGMQDEVRAVGEEQRSEEPKRRVDTSVSWEALICVGSSKKRARKASSSDDEGGPRTLGGDGHRAEEASKDKE	VKSATLSSTESTASGMQDEVRAVGEEQRSEEPKRRVDTSVSWEALICVGSSKKRARKASSSDDEGGPRTLGGDGHRAEEASKDKE
CACGGCGTCTGGAATGCAGGATGAGGTCAGAGCGGTTGGCGAGGAGCAAAGGTCAGAGGAGCCAAAGCGCAGGGTGGATACTTCAGTGTCTTGGGAGGCGTTGATTTGTGTCGGATCGTCCAAGAAGAGAGCGAGGAAGG	CACGGCGTCTGGAATGAAGGATGAGGTCAGAGCGGTTGGCGAGGAGCAAAGGTCAGAGGAGCCAAAGCGCAGGGTGGATACTTCAGTGTCTTGGGAGGCGTTGATTTGTGTCGGATCGTCCAAGAAGAGAGCGAGGAAGG	2	WT	VKSATLSSTESTASGMQDEVRAVGEEQRSEEPKRRVDTSVSWEALICVGSSKKRARKASSSDDEGGPRTLGGDGHRAEEASKDKE	VKSATLSSTESTASGMQDEVRAVGEEQRSEEPKRRVDTSVSWEALICVGSSKKRARKASSSDDEGGPRTLGGDGHRAEEASKDKE
CACGGCGTCTGGAATGCAGGATGAGGTCAGAGCGGTTGGCGAGGAGCAAAGGTCAGAGGAGCCAAAGCGCAGGGTGGATACTTCAGTGTCTTGGGAGGCGTTGATTTGTGTCGGATCGTCCAAGAAGAGAGCGAGGAAGG	CACGGCGTCTGGAATGCCGGATGAGGTCAGAGCGGTTGGCGAGGAGCAAAGGTCAGAGGAGCCAAAGCGCAGGGTGGATACTTCAGTGTCTTGGGAGGCGTTGATTTGTGTCGGATCGTCCAAGAAGAGAGCGAGGAAGG	2	WT	VKSATLSSTESTASGMQDEVRAVGEEQRSEEPKRRVDTSVSWEALICVGSSKKRARKASSSDDEGGPRTLGGDGHRAEEASKDKE	VKSATLSSTESTASGMQDEVRAVGEEQRSEEPKRRVDTSVSWEALICVGSSKKRARKASSSDDEGGPRTLGGDGHRAEEASKDKE
CACGGCGTCTGGAATGCAGGATGAGGTCAGAGCGGTTGGCGAGGAGCAAAGGTCAGAGGAGCCAAAGCGCAGGGTGGATACTTCAGTGTCTTGGGAGGCGTTGATTTGTGTCGGATCGTCCAAGAAGAGAGCGAGGAAGG	CACGGCGTCTTGAATGCAGGGTGAGGTCAGAGCGGTTGGCGAGGAGCAAAGGTCAGAGGAGCCAAAGCGCAGGGTGGATACTTCAGTGTCTTGGGAGGCGTTGATTTGTGTCGGATCGTCCAAGAAGAGAGCGAGGAAGG	2	WT	VKSATLSSTESTASGMQDEVRAVGEEQRSEEPKRRVDTSVSWEALICVGSSKKRARKASSSDDEGGPRTLGGDGHRAEEASKDKE	VKSATLSSTESTASGMQDEVRAVGEEQRSEEPKRRVDTSVSWEALICVGSSKKRARKASSSDDEGGPRTLGGDGHRAEEASKDKE
CACGGCGTCTGGAATGCAGGATGAGGTCAGAGCGGTTGGCGAGGAGCAAAGGTCAGAGGAGCCAAAGCGCAGGGTGGATACTTCAGTGTCTTGGGAGGCGTTGATTTGTGTCGGATCGTCCAAGAAGAGAGCGAGGAAGG	GACGGCGTCTGGAATGCAGGATGAGGTCAGAGCGGTTGGCGAGGAGCAAAGGTCAGAGGAGCCAAAGCGCAGGGTGGATACTTCAGTGTCTTGGGAGGCGTTGATTTGTGTCGGATCGTCCAAGAAGAGAGCGAGGAAGG	2	WT	VKSATLSSTESTASGMQDEVRAVGEEQRSEEPKRRVDTSVSWEALICVGSSKKRARKASSSDDEGGPRTLGGDGHRAEEASKDKE	VKSATLSSTESTASGMQDEVRAVGEEQRSEEPKRRVDTSVSWEALICVGSSKKRARKASSSDDEGGPRTLGGDGHRAEEASKDKE
CACGGCGTCTGGAATGCAGGATGAGGTCAGAGCGGTTGGCGAGGAGCAAAGGTCAGAGGAGCCAAAGCGCAGGGTGGATACTTCAGTGTCTTGGGAGGCGTTGATTTGTGTCGGATCGTCCAAGAAGAGAGCGAGGAAGG	CTCGGCGTCTGGAATGCAGGATGAGGTCAGAGCGGTTGGCGAGGAGCAAAGGTCAGAGGAGCCAAAGCGCAGGGTGGATACTTCGGTGTCTTGGGAGGCGTTGATTTGTGTCGGATCGTCCAAGAAGAGAGCGAGGAAGG	2	WT	VKSATLSSTESTASGMQDEVRAVGEEQRSEEPKRRVDTSVSWEALICVGSSKKRARKASSSDDEGGPRTLGGDGHRAEEASKDKE	VKSATLSSTESTASGMQDEVRAVGEEQRSEEPKRRVDTSVSWEALICVGSSKKRARKASSSDDEGGPRTLGGDGHRAEEASKDKE
CACGGCGTCTGGAATGCAGGATGAGGTCAGAGCGGTTGGCGAGGAGCAAAGGTCAGAGGAGCCAAAGCGCAGGGTGGATACTTCAGTGTCTTGGGAGGCGTTGATTTGTGTCGGATCGTCCAAGAAGAGAGCGAGGAAGG	CACGGCGTCTGGAATGCAGGATGAGGTCAGAGCGGTTGGCGAGGAGCAAAGATCAGAGGAGCCAAAGCGCAGGGTGGATACTTCAGTGTCTTGGGAGGCGTTGATTTGTGTCGGATCGTCCAAGAAGAGAGCGAGGAAGG	2	WT	VKSATLSSTESTASGMQDEVRAVGEEQRSEEPKRRVDTSVSWEALICVGSSKKRARKASSSDDEGGPRTLGGDGHRAEEASKDKE	VKSATLSSTESTASGMQDEVRAVGEEQRSEEPKRRVDTSVSWEALICVGSSKKRARKASSSDDEGGPRTLGGDGHRAEEASKDKE
CACGGCGTCTGGAATGCAGGATGAGGTCAGAGCGGTTGGCGAGGAGCAAAGGTCAGAGGAGCCAAAGCGCAGGGTGGATACTTCAGTGTCTTGGGAGGCGTTGATTTGTGTCGGATCGTCCAAGAAGAGAGCGAGGAAGG	CACGGCGTCTGGAATGCAGGATGAGGCCAGAGCGGTTGGCGAGGAGCAAAGGTCAGAGGAGCCAAAGCGCAGGGTGGATACTTCAGTGTCTTGGGAGGCGTTGGTTTGTGTCGGATCGTCCAAGAAGAGAGCGAGGAAGG	2	WT	VKSATLSSTESTASGMQDEVRAVGEEQRSEEPKRRVDTSVSWEALICVGSSKKRARKASSSDDEGGPRTLGGDGHRAEEASKDKE	VKSATLSSTESTASGMQDEVRAVGEEQRSEEPKRRVDTSVSWEALICVGSSKKRARKASSSDDEGGPRTLGGDGHRAEEASKDKE
CACGGCGTCTGGAATGCAGGATGAGGTCAGAGCGGTTGGCGAGGAGCAAAGGTCAGAGGAGCCAAAGCGCAGGGTGGATACTTCAGTGTCTTGGGAGGCGTTGATTTGTGTCGGATCGTCCAAGAAGAGAGCGAGGAAGG	CACGGCGTCTGGAATGCAGGATGAGGTCAGAGCGGTTGGCGAGGAGCAAAGGTCAGAGGAGCCAAAGCGCAGGGTCGATACTTCAGTGTCTTGGGAGGCGTTGATTTGTGTCGGATCGTCCAAGAAGAGAGCGAGGAAGG	2	WT	VKSATLSSTESTASGMQDEVRAVGEEQRSEEPKRRVDTSVSWEALICVGSSKKRARKASSSDDEGGPRTLGGDGHRAEEASKDKE	VKSATLSSTESTASGMQDEVRAVGEEQRSEEPKRRVDTSVSWEALICVGSSKKRARKASSSDDEGGPRTLGGDGHRAEEASKDKE
CACGGCGTCTGGAATGCAGGATGAGGTCAGAGCGGTTGGCGAGGAGCAAAGGTCAGAGGAGCCAAAGCGCAGGGTGGATACTTCAGTGTCTTGGGAGGCGTTGATTTGTGTCGGATCGTCCAAGAAGAGAGCGAGGAAGG	CACGGCGTCTGGAATGCAGGATGAGGTCAGAGCGGTTGGCGAGGAGCAAAGGTCAGAGGAGCCGAAGCGCAGGGTGGATACTTCAGTGTCTTGGGAGGCGTTGATTTGTGTCGGATCGTCCAAGAAGAGAGCGAGGAATG	2	WT	VKSATLSSTESTASGMQDEVRAVGEEQRSEEPKRRVDTSVSWEALICVGSSKKRARKASSSDDEGGPRTLGGDGHRAEEASKDKE	VKSATLSSTESTASGMQDEVRAVGEEQRSEEPKRRVDTSVSWEALICVGSSKKRARKASSSDDEGGPRTLGGDGHRAEEASKDKE
CACGGCGTCTGGAATGCAGGATGAGGTCAGAGCGGTTGGCGAGGAGCAAAGGTCAGAGGAGCCAAAGCGCAGGGTGGATACTTCAGTGTCTTGGGAGGCGTTGATTTGTGTCGGATCGTCCAAGAAGAGAGCGAGGAAGG	CACGGCGTCTGGAATGCAGGATGAGGTCAGAGCGGTTGGCGAGGAGCAAAGGTCAGAGGAGCCCAAGCGCAGGGTGGATACTTCAGTGTCTTGGGAGGCGTTGATTTGTGTCGGATCGTCCAAGAAGAGAGCGAGGAAGG	2	WT	VKSATLSSTESTASGMQDEVRAVGEEQRSEEPKRRVDTSVSWEALICVGSSKKRARKASSSDDEGGPRTLGGDGHRAEEASKDKE	VKSATLSSTESTASGMQDEVRAVGEEQRSEEPKRRVDTSVSWEALICVGSSKKRARKASSSDDEGGPRTLGGDGHRAEEASKDKE
CACGGCGTCTGGAATGCAGGATGAGGTCAGAGCGGTTGGCGAGGAGCAAAGGTCAGAGGAGCCAAAGCGCAGGGTGGATACTTCAGTGTCTTGGGAGGCGTTGATTTGTGTCGGATCGTCCAAGAAGAGAGCGAGGAAGG	CACGGCGTCTGGAATGCAGGATGAGGTCAGAGCGGTTGGCGAGGAGCAAAGGTCAAAGGAGCCAAAGCGCAGGGTGGATACTTCAGTGTCTTGGGAGGCGTCGATTTGTGTCGGATCGTCCAAGAAGAGAGCGAGGAAGG	2	WT	VKSATLSSTESTASGMQDEVRAVGEEQRSEEPKRRVDTSVSWEALICVGSSKKRARKASSSDDEGGPRTLGGDGHRAEEASKDKE	VKSATLSSTESTASGMQDEVRAVGEEQRSEEPKRRVDTSVSWEALICVGSSKKRARKASSSDDEGGPRTLGGDGHRAEEASKDKE
CACGGCGTCTGGAATGCAGGATGAGGTCAGAGCGGTTGGCGAGGAGCAAAGGTCAGAGGAGCCAAAGCGCAGGGTGGATACTTCAGTGTCTTGGGAGGCGTTGATTTGTGTCGGATCGTCCAAGAAGAGAGCGAGGAAGG	CACGGCGTCCGGAATGCAGGATGAGGTCAGAGCGGTTGGCGAGGAGCAAAGGTCAGAGGAGCCAAAGCGCAGGGTGGATACTTCAGTGTCTTGGGAGGCGTTGATTTGTGTCGGATCGTCCGAGAAGAGAGCGAGGAAGG	2	WT	VKSATLSSTESTASGMQDEVRAVGEEQRSEEPKRRVDTSVSWEALICVGSSKKRARKASSSDDEGGPRTLGGDGHRAEEASKDKE	VKSATLSSTESTASGMQDEVRAVGEEQRSEEPKRRVDTSVSWEALICVGSSKKRARKASSSDDEGGPRTLGGDGHRAEEASKDKE
CACGGCGTCTGGAATGCAGGATGAGGTCAGAGCGGTTGGCGAGGAGCAAAGGTCAGAGGAGCCAAAGCGCAGGGTGGATACTTCAGTGTCTTGGGAGGCGTTGATTTGTGTCGGATCGTCCAAGAAGAGAGCGAGGAAGG	CACGGCGTCTGGAATGCAGGATGAGGTCAGAGCGGTTGGCGAGGAGCAAAGGTCAGAGGAGCCAAAGCGCAGAGTGGATACTTCAGCGTCTTGGGAGGCGTTGATTTGTGTCGGATCGTCCAAGAAGAGAGCGAGGAAGG	2	WT	VKSATLSSTESTASGMQDEVRAVGEEQRSEEPKRRVDTSVSWEALICVGSSKKRARKASSSDDEGGPRTLGGDGHRAEEASKDKE	VKSATLSSTESTASGMQDEVRAVGEEQRSEEPKRRVDTSVSWEALICVGSSKKRARKASSSDDEGGPRTLGGDGHRAEEASKDKE
CACGGCGTCTGGAATGCAGGATGAGGTCAGAGCGGTTGGCGAGGAGCAAAGGTCAGAGGAGCCAAAGCGCAGGGTGGATACTTCAGTGTCTTGGGAGGCGTTGATTTGTGTCGGATCGTCCAAGAAGAGAGCGAGGAAGG	CACGGCGTCTGGAATGCAGGATGAGGTCGGAGCGGTTGGCGAGGAGCAAAGGTCAGAGGAGCCAAAGCGCAGGGTGGATACTTCAGTGTCTTGGGAGGCGTCGATTTGTGTCGGATCGTCCAAGAAGAGAGCGAGGAAGG	2	WT	VKSATLSSTESTASGMQDEVRAVGEEQRSEEPKRRVDTSVSWEALICVGSSKKRARKASSSDDEGGPRTLGGDGHRAEEASKDKE	VKSATLSSTESTASGMQDEVRAVGEEQRSEEPKRRVDTSVSWEALICVGSSKKRARKASSSDDEGGPRTLGGDGHRAEEASKDKE
CACGGCGTCTGGAATGCAGGATGAGGTCAGAGCGGTTGGCGAGGAGCAAAGGTCAGAGGAGCCAAAGCGCAGGGTGGATACTTCAGTGTCTTGGGAGGCGTTGATTTGTGTCGGATCGTCCAAGAAGAGAGCGAGGAAGG	CACGGCGTCTGGAATGCAGGATGAGGTCAGAGCGGTTGGCGAGGAGCAAAGGTCAGAGGAGCCAAAGCGCAGGGTGGATACTTCAGTGTCTTGGGAGGCGTTGATTTGTGTCGGATCGTCCAAGAAGAGAGAGAGGAAGG	2	WT	VKSATLSSTESTASGMQDEVRAVGEEQRSEEPKRRVDTSVSWEALICVGSSKKRARKASSSDDEGGPRTLGGDGHRAEEASKDKE	VKSATLSSTESTASGMQDEVRAVGEEQRSEEPKRRVDTSVSWEALICVGSSKKRARKASSSDDEGGPRTLGGDGHRAEEASKDKE
CACGGCGTCTGGAATGCAGGATGAGGTCAGAGCGGTTGGCGAGGAGCAAAGGTCAGAGGAGCCAAAGCGCAGGGTGGATACTTCAGTGTCTTGGGAGGCGTTGATTTGTGTCGGATCGTCCAAGAAGAGAGCGAGGAAGG	CACGGCGTCTGGAATGCAGGATGAGGTCAGAGCGGTTGGCGAGGAGCAAAGGTCAGAGGAGCCAAAGCGCAGGGTGGATACTTCAGTGTCTTGGGAGGAGTTGATTTGTGTCGGACCGTCCAAGAAGAGAGCGAGGAAGG	2	WT	VKSATLSSTESTASGMQDEVRAVGEEQRSEEPKRRVDTSVSWEALICVGSSKKRARKASSSDDEGGPRTLGGDGHRAEEASKDKE	VKSATLSSTESTASGMQDEVRAVGEEQRSEEPKRRVDTSVSWEALICVGSSKKRARKASSSDDEGGPRTLGGDGHRAEEASKDKE
CACGGCGTCTGGAATGCAGGATGAGGTCAGAGCGGTTGGCGAGGAGCAAAGGTCAGAGGAGCCAAAGCGCAGGGTGGATACTTCAGTGTCTTGGGAGGCGTTGATTTGTGTCGGATCGTCCAAGAAGAGAGCGAGGAAGG	CACGGCGTCTGGAATGCAGGATGAGGTCAGAGCGGTTGGCGAGGAGCAAAGGTCAGAGGAGCCAAAGCGCAGGGTGGATACTTCAGTGTCTTGGGAGGCGTTGATTTGTGTCGGATCGTCC-AGAAGAGAGCGAGGAAGG	2	WT	VKSATLSSTESTASGMQDEVRAVGEEQRSEEPKRRVDTSVSWEALICVGSSKKRARKASSSDDEGGPRTLGGDGHRAEEASKDKE	VKSATLSSTESTASGMQDEVRAVGEEQRSEEPKRRVDTSVSWEALICVGSSKKRARKASSSDDEGGPRTLGGDGHRAEEASKDKE
CACGGCGTCTGGAATGCAGGATGAGGTCAGAGCGGTTGGCGAGGAGCAAAGGTCAGAGGAGCCAAAGCGCAGGGTGGATACTTCAGTGTCTTGGGAGGCGTTGATTTGTGTCGGATCGTCCAAGAAGAGAGCGAGGAAGG	CACGGCGTCTGGAATGCATGATGAGGTCAGAGCGGTTGACGAGGAGCAAAGGTCAGAGGAGCCAAAGCGCAGGGTGGATACTTCAGTGTCTTGGGAGGCGTTGATTTGTGTCGGATCGTCCAAGAAGAGAGCGAGGAAGG	2	WT	VKSATLSSTESTASGMQDEVRAVGEEQRSEEPKRRVDTSVSWEALICVGSSKKRARKASSSDDEGGPRTLGGDGHRAEEASKDKE	VKSATLSSTESTASGMQDEVRAVGEEQRSEEPKRRVDTSVSWEALICVGSSKKRARKASSSDDEGGPRTLGGDGHRAEEASKDKE
CACGGCGTCTGGAATGCAGGATGAGGTCAGAGCGGTTGGCGAGGAGCAAAGGTCAGAGGAGCCAAAGCGCAGGGTGGATACTTCAGTGTCTTGGGAGGCGTTGATTTGTGTCGGATCGTCCAAGAAGAGAGCGAGGAAGG	CACGGCGTCTGGAATGCAGGATGAGGTCAGAGCGGTTGGCGAGGAGCAAAGGTCATAGGAGCCAAAGCGCAGGGTGGATACTTCAGTGTCTTGGGAGGCGTTGATTTGTGTCGGATCGTCCAAGAAGAGAGCGAGGAAGG	2	WT	VKSATLSSTESTASGMQDEVRAVGEEQRSEEPKRRVDTSVSWEALICVGSSKKRARKASSSDDEGGPRTLGGDGHRAEEASKDKE	VKSATLSSTESTASGMQDEVRAVGEEQRSEEPKRRVDTSVSWEALICVGSSKKRARKASSSDDEGGPRTLGGDGHRAEEASKDKE
CACGGCGTCTGGAATGCAGGATGAGGTCAGAGCGGTTGGCGAGGAGCAAAGGTCAGAGGAGCCAAAGCGCAGGGTGGATACTTCAGTGTCTTGGGAGGCGTTGATTTGTGTCGGATCGTCCAAGAAGAGAGCGAGGAAGG	CACGGCGTCTGGAATGCAGGATGAGGTCAGAGCGGTTGGCGAGGAGCAAAGGTCAGGGGAGCCAAAGCGCAGGGTGGATACTTCAGTGTCTTGGGAGGCGTTGATTTGTGTCGGATCGTCCAAGGAGAGAGCGAGGAAGG	2	WT	VKSATLSSTESTASGMQDEVRAVGEEQRSEEPKRRVDTSVSWEALICVGSSKKRARKASSSDDEGGPRTLGGDGHRAEEASKDKE	VKSATLSSTESTASGMQDEVRAVGEEQRSEEPKRRVDTSVSWEALICVGSSKKRARKASSSDDEGGPRTLGGDGHRAEEASKDKE
CACGGCGTCTGGAATGCAGGATGAGGTCAGAGCGGTTGGCGAGGAGCAAAGGTCAGAGGAGCCAAAGCGCAGGGTGGATACTTCAGTGTCTTGGGAGGCGTTGATTTGTGTCGGATCGTCCAAGAAGAGAGCGAGGAAGG	CACGGCCTCTGGAATGCAGGATGAGGTCAGAGCGGTTGGCGAGGAGCAAAGGTCAGAGGAGCCAAAGCGCAGGGTGGATACTTCAGTGTCTTGGGAGGCGTTGATTTGTGTCGGATCGTCCAAGAAGAGAGCGAGGAAGG	2	WT	VKSATLSSTESTASGMQDEVRAVGEEQRSEEPKRRVDTSVSWEALICVGSSKKRARKASSSDDEGGPRTLGGDGHRAEEASKDKE	VKSATLSSTESTASGMQDEVRAVGEEQRSEEPKRRVDTSVSWEALICVGSSKKRARKASSSDDEGGPRTLGGDGHRAEEASKDKE
CACGGCGTCTGGAATGCAGGATGAGGTCAGAGCGGTTGGCGAGGAGCAAAGGTCAGAGGAGCCAAAGCGCAGGGTGGATACTTCAGTGTCTTGGGAGGCGTTGATTTGTGTCGGATCGTCCAAGAAGAGAGCGAGGAAGG	CACGGCGTCTGGAATGCAGGATGAGGTCAGAGCGGTTGGCGAGGAGCAAAGGTCAGAGTAGCCAAAGCGCAGGGTGGATACTTCAGTGTCTTGGGAGGCGTTGATTTGTGTCGGATCGTCCAAGAAGAGAGCGGGGAAGG	2	WT	VKSATLSSTESTASGMQDEVRAVGEEQRSEEPKRRVDTSVSWEALICVGSSKKRARKASSSDDEGGPRTLGGDGHRAEEASKDKE	VKSATLSSTESTASGMQDEVRAVGEEQRSEEPKRRVDTSVSWEALICVGSSKKRARKASSSDDEGGPRTLGGDGHRAEEASKDKE
CACGGCGTCTGGAATGCAGGATGAGGTCAGAGCGGTTGGCGAGGAGCAAAGGTCAGAGGAGCCAAAGCGCAGGGTGGATACTTCAGTGTCTTGGGAGGCGTTGATTTGTGTCGGATCGTCCAAGAAGAGAGCGAGGAAGG	CACGGCGTCTGGAATGCAGGATGAGGTCAGAACGGTTGGCGAGGAGCAAAGGTCAGAGGAGCCAAAGCGCGGGGTGGATACTTCAGTGTCTTGGGAGGCGTTGATTTGTGTCGGATCGTCCAAGAAGAGAGCGAGGAAGG	2	WT	VKSATLSSTESTASGMQDEVRAVGEEQRSEEPKRRVDTSVSWEALICVGSSKKRARKASSSDDEGGPRTLGGDGHRAEEASKDKE	VKSATLSSTESTASGMQDEVRAVGEEQRSEEPKRRVDTSVSWEALICVGSSKKRARKASSSDDEGGPRTLGGDGHRAEEASKDKE
CACGGCGTCTGGAATGCAGGATGAGGTCAGAGCGGTTGGCGAGGAGCAAAGGTCAGAGGAGCCAAAGCGCAGGGTGGATACTTCAGTGTCTTGGGAGGCGTTGATTTGTGTCGGATCGTCCAAGAAGAGAGCGAGGAAGG	CACGGCGTCTTGAATGCAGGATGAGGTCAGAGCGGTTGGCGAGAAGCAAAGGTCAGAGGAGCCAAAGCGCAGGGTGGATACTTCAGTGTCTTGGGAGGCGTTGATTTGTGTCGGATCGTCCAAGAAGAGAGCGAGGAAGG	2	WT	VKSATLSSTESTASGMQDEVRAVGEEQRSEEPKRRVDTSVSWEALICVGSSKKRARKASSSDDEGGPRTLGGDGHRAEEASKDKE	VKSATLSSTESTASGMQDEVRAVGEEQRSEEPKRRVDTSVSWEALICVGSSKKRARKASSSDDEGGPRTLGGDGHRAEEASKDKE
CACGGCGTCTGGAATGCAGGATGAGGTCAGAGCGGTTGGCGAGGAGCAAAGGTCAGAGGAGCCAAAGCGCAGGGTGGATACTTCAGTGTCTTGGGAGGCGTTGATTTGTGTCGGATCGTCCAAGAAGAGAGCGAGGAAGG	CACGGCGTCTGGAATGCAGGATGAGGTCAGAGCGGTTGTCGAGGAGCAAAGGTCAGAGGAGCCAAAGCGCAGGGTGGATACTTCAGTGTCTTGGGAGGCGTTGATTTGCGTCGGATCGTCCAAGAAGAGAGCGAGGAAGG	2	WT	VKSATLSSTESTASGMQDEVRAVGEEQRSEEPKRRVDTSVSWEALICVGSSKKRARKASSSDDEGGPRTLGGDGHRAEEASKDKE	VKSATLSSTESTASGMQDEVRAVGEEQRSEEPKRRVDTSVSWEALICVGSSKKRARKASSSDDEGGPRTLGGDGHRAEEASKDKE
CACGGCGTCTGGAATGCAGGATGAGGTCAGAGCGGTTGGCGAGGAGCAAAGGTCAGAGGAGCCAAAGCGCAGGGTGGATACTTCAGTGTCTTGGGAGGCGTTGATTTGTGTCGGATCGTCCAAGAAGAGAGCGAGGAAGG	CACGGCGTCTGGAATGCAGGATGAGGTCAGAGCGGTTGGCGAGGAGC-AAGGTCAGAGGAGCCAAAGCGCAGGGTGGATACTTCAGTGTCTTGGGAGGCGTTGATTTGTGTCGGATCGTCCAAGAAGAGAGCGAGGAAGG	2	WT	VKSATLSSTESTASGMQDEVRAVGEEQRSEEPKRRVDTSVSWEALICVGSSKKRARKASSSDDEGGPRTLGGDGHRAEEASKDKE	VKSATLSSTESTASGMQDEVRAVGEEQRSEEPKRRVDTSVSWEALICVGSSKKRARKASSSDDEGGPRTLGGDGHRAEEASKDKE
CACGGCGTCTGGAATGCAGGATGAGGTCAGAGCGGTTGGCGAGGAGCAAAGGTCAGAGGAGCCAAAGCGCAGGGTGGATACTTCAGTGTCTTGGGAGGCGTTGATTTGTGTCGGATCGTCCAAGAAGAGAGCGAGGAAGG	CACGGCGTCTGGAATGCAGGATGAGGTCTGAGCGGTTGGCGAGGAGCAAAGGTCAGAGGAGCCAAAGCGCAGGGTGGATACTTCAGTGTCTTGGGAGGCGTTGATTTGTGTCGGATCGTCCAAGAAGAGAGCGAGGAAGG	2	WT	VKSATLSSTESTASGMQDEVRAVGEEQRSEEPKRRVDTSVSWEALICVGSSKKRARKASSSDDEGGPRTLGGDGHRAEEASKDKE	VKSATLSSTESTASGMQDEVRAVGEEQRSEEPKRRVDTSVSWEALICVGSSKKRARKASSSDDEGGPRTLGGDGHRAEEASKDKE
CACGGCGTCTGGAATGCAGGATGAGGTCAGAGCGGTTGGCGAGGAGCAAAGGTCAGAGGAGCCAAAGCGCAGGGTGGATACTTCAGTGTCTTGGGAGGCGTTGATTTGTGTCGGATCGTCCAAGAAGAGAGCGAGGAAGG	CACGGCGTCTGGAATGCAGGATGAGGTCGGAGCGGTTGGCGAGGAGCAAAGGTCAGAGGAGCCAAAGCGCAGGGTGGATACTTCAGTGTCTTGGGAGGCGTTGATTTGTGTCGGGTCGTCCAAGAAGAGAGCGAGGAAGG	2	WT	VKSATLSSTESTASGMQDEVRAVGEEQRSEEPKRRVDTSVSWEALICVGSSKKRARKASSSDDEGGPRTLGGDGHRAEEASKDKE	VKSATLSSTESTASGMQDEVRAVGEEQRSEEPKRRVDTSVSWEALICVGSSKKRARKASSSDDEGGPRTLGGDGHRAEEASKDKE
CACGGCGTCTGGAATGCAGGATGAGGTCAGAGCGGTTGGCGAGGAGCAAAGGTCAGAGGAGCCAAAGCGCAGGGTGGATACTTCAGTGTCTTGGGAGGCGTTGATTTGTGTCGGATCGTCCAAGAAGAGAGCGAGGAAGG	CACGGCGTCTGGAATGCAGGATGAGGTCAGAGCGGTTGGCGAGGAGCAAAGGTCAGAGGAGCCAAAGCGCAGGGTGCATACTTCAGTGTCTTGGGAGGCGTTGATTTGTGTCGGATCGTCCAAGAAGAGAGCGAGGAAGG	2	WT	VKSATLSSTESTASGMQDEVRAVGEEQRSEEPKRRVDTSVSWEALICVGSSKKRARKASSSDDEGGPRTLGGDGHRAEEASKDKE	VKSATLSSTESTASGMQDEVRAVGEEQRSEEPKRRVDTSVSWEALICVGSSKKRARKASSSDDEGGPRTLGGDGHRAEEASKDKE
CACGGCGTCTGGAATGCAGGATGAGGTCAGAGCGGTTGGCGAGGAGCAAAGGTCAGAGGAGCCAAAGCGCAGGGTGGATACTTCAGTGTCTTGGGAGGCGTTGATTTGTGTCGGATCGTCCAAGAAGAGAGCGAGGAAGG	CACGGCGTCTGGAATGCGGGATGAGGTCAGAGCGGTTGGCGAGGAGAAAAGGTCAGAGGAGCCAAAGCGCAGGGTGGATGCTTCAGTGTCTTGGGAGGCGTTGATTTGTGTCGGATCGTCCAAGAAGAGAGCGAGGAAGG	2	WT	VKSATLSSTESTASGMQDEVRAVGEEQRSEEPKRRVDTSVSWEALICVGSSKKRARKASSSDDEGGPRTLGGDGHRAEEASKDKE	VKSATLSSTESTASGMQDEVRAVGEEQRSEEPKRRVDTSVSWEALICVGSSKKRARKASSSDDEGGPRTLGGDGHRAEEASKDKE
CACGGCGTCTGGAATGCAGGATGAGGTCAGAGCGGTTGGCGAGGAGCAAAGGTCAGAGGAGCCAAAGCGCAGGGTGGATACTTCAGTGTCTTGGGAGGCGTTGATTTGTGTCGGATCGTCCAAGAAGAGAGCGAGGAAGG	CACGGCGACTGGAATGCAGGATGAGGTCAGAGCGGTTGGCGAGGAGCAAAGGTCAGAGGAGCCAAAGCGCAGGGTGGATACTTCAGTGTCTTGGGAGGCGTTGATTTGTGTCGGATCGTCCAAGAAGAGAGCGAGGAAGG	2	WT	VKSATLSSTESTASGMQDEVRAVGEEQRSEEPKRRVDTSVSWEALICVGSSKKRARKASSSDDEGGPRTLGGDGHRAEEASKDKE	VKSATLSSTESTASGMQDEVRAVGEEQRSEEPKRRVDTSVSWEALICVGSSKKRARKASSSDDEGGPRTLGGDGHRAEEASKDKE
CACGGCGTCTGGAATGCAGGATGAGGTCAGAGCGGTTGGCGAGGAGCAAAGGTCAGAGGAGCCAAAGCGCAGGGTGGATACTTCAGTGTCTTGGGAGGCGTTGATTTGTGTCGGATCGTCCAAGAAGAGAGCGAGGAAGG	CACAGCGTCTGGAATGCAGGATGAGGTCAGAGCGGTTGGCGAGGAGCAAAGGTCAGAGGAGCCAAAGCGCAGGGTGGATACTTCAGTGTCTTGGGAGGCGTTGATTTGTGTCGGATCGTCCAAGAAGAGAGCGAGGAAGT	2	WT	VKSATLSSTESTASGMQDEVRAVGEEQRSEEPKRRVDTSVSWEALICVGSSKKRARKASSSDDEGGPRTLGGDGHRAEEASKDKE	VKSATLSSTESTASGMQDEVRAVGEEQRSEEPKRRVDTSVSWEALICVGSSKKRARKASSSDDEGGPRTLGGDGHRAEEASKDKE
CACGGCGTCTGGAATGCAGGATGAGGTCAGAGCGGTTGGCGAGGAGCAAAGGTCAGAGGAGCCAAAGCGCAGGGTGGATACTTCAGTGTCTTGGGAGGCGTTGATTTGTGTCGGATCGTCCAAGAAGAGAGCGAGGAAGG	AACGGCGTCTGGAATGCAGGATGAGGTCAGAGCGGTTGGCGAGGAGCAAAGGTCAGAGGAGCCAAAGCGCAGGGTGGATACTTCAGTGTCTTGGGAGGCGTTGATTTGTGTCGGATCGTCCAAGAAGAGAGCGAGGAAGG	2	WT	VKSATLSSTESTASGMQDEVRAVGEEQRSEEPKRRVDTSVSWEALICVGSSKKRARKASSSDDEGGPRTLGGDGHRAEEASKDKE	VKSATLSSTESTASGMQDEVRAVGEEQRSEEPKRRVDTSVSWEALICVGSSKKRARKASSSDDEGGPRTLGGDGHRAEEASKDKE
CACGGCGTCTGGAATGCAGGATGAGGTCAGAGCGGTTGGCGAGGAGCAAAGGTCAGAGGAGCCAAAGCGCAGGGTGGATACTTCAGTGTCTTGGGAGGCGTTGATTTGTGTCGGATCGTCCAAGAAGAGAGCGAGGAAGG	CACGGCGTCTGGAATGCAGGATGAGGTCAGAGCGGTTGGCGAGGAGCAAAGTTCAGAGGAGCCAAAGCGCAGGGTGGATACTTCAGTGTCTTGGGAGGCGTTGATTTGTGTCGGATCGTCCAAGAAGAGAGCGAGGAAGG	2	WT	VKSATLSSTESTASGMQDEVRAVGEEQRSEEPKRRVDTSVSWEALICVGSSKKRARKASSSDDEGGPRTLGGDGHRAEEASKDKE	VKSATLSSTESTASGMQDEVRAVGEEQRSEEPKRRVDTSVSWEALICVGSSKKRARKASSSDDEGGPRTLGGDGHRAEEASKDKE
CACGGCGTCTGGAATGCAGGATGAGGTCAGAGCGGTTGGCGAGGAGCAAAGGTCAGAGGAGCCAAAGCGCAGGGTGGATACTTCAGTGTCTTGGGAGGCGTTGATTTGTGTCGGATCGTCCAAGAAGAGAGCGAGGAAGG	CACGGCGTCTGGAATGCAGGCTGAGGTCAGAGCGGTTGGCGAGGAGCAAAGGTCAGAGGAGCCAAAGCGCAGGGTGGATACTTCAGTGTCTTGGGAGGCGTTGATTTGTGTCGGATCGTCCAAGAAGAGAGCGAGGAAGG	2	WT	VKSATLSSTESTASGMQDEVRAVGEEQRSEEPKRRVDTSVSWEALICVGSSKKRARKASSSDDEGGPRTLGGDGHRAEEASKDKE	VKSATLSSTESTASGMQDEVRAVGEEQRSEEPKRRVDTSVSWEALICVGSSKKRARKASSSDDEGGPRTLGGDGHRAEEASKDKE
CACGGCGTCTGGAATGCAGGATGAGGTCAGAGCGGTTGGCGAGGAGCAAAGGTCAGAGGAGCCAAAGCGCAGGGTGGATACTTCAGTGTCTTGGGAGGCGTTGATTTGTGTCGGATCGTCCAAGAAGAGAGCGAGGAAGG	CACGGCATCTGGAATGCAGGATGAGGTCAGAGCGGTTGGCGAGGAGCAAAGGTCAGAGGAGCCAAAGCGCAGGGTGGATACTTCAGTGTCTTGGGAGGCGTCGATTTGTGTCGGATCGTCCAAGAAGAGAGCGAGGAAGG	2	WT	VKSATLSSTESTASGMQDEVRAVGEEQRSEEPKRRVDTSVSWEALICVGSSKKRARKASSSDDEGGPRTLGGDGHRAEEASKDKE	VKSATLSSTESTASGMQDEVRAVGEEQRSEEPKRRVDTSVSWEALICVGSSKKRARKASSSDDEGGPRTLGGDGHRAEEASKDKE
CACGGCGTCTGGAATGCAGGATGAGGTCAGAGCGGTTGGCGAGGAGCAAAGGTCAGAGGAGCCAAAGCGCAGGGTGGATACTTCAGTGTCTTGGGAGGCGTTGATTTGTGTCGGATCGTCCAAGAAGAGAGCGAGGAAGG	CACGGCGTCTGGACTGCAGGATGAGGTCAGAGCGGTTGGCGAGGAGCAAAGGTCAGAGGAGCCAAAGCGCAGGGTGGATGCTTCAGTGTCTTGGGAGGCGTTGATTTGTGTCGGATCGTCCAAGAAGAGAGCGAGGAAGG	2	WT	VKSATLSSTESTASGMQDEVRAVGEEQRSEEPKRRVDTSVSWEALICVGSSKKRARKASSSDDEGGPRTLGGDGHRAEEASKDKE	VKSATLSSTESTASGMQDEVRAVGEEQRSEEPKRRVDTSVSWEALICVGSSKKRARKASSSDDEGGPRTLGGDGHRAEEASKDKE
CACGGCGTCTGGAATGCAGGATGAGGTCAGAGCGGTTGGCGAGGAGCAAAGGTCAGAGGAGCCAAAGCGCAGGGTGGATACTTCAGTGTCTTGGGAGGCGTTGATTTGTGTCGGATCGTCCAAGAAGAGAGCGAGGAAGG	CACGGCGTCTGGAATGCAGGATGAGGTCAGAGCGGTTGGCGAGGAGCAAAGGTCAGAGGAGCCAAAGCGCAGGGTGGATACTTCAGTGTCTTGGGAGGCGGTGATTTGTGTCGGATCGTCCAAGAAGAGAGCGAGGAAGG	2	WT	VKSATLSSTESTASGMQDEVRAVGEEQRSEEPKRRVDTSVSWEALICVGSSKKRARKASSSDDEGGPRTLGGDGHRAEEASKDKE	VKSATLSSTESTASGMQDEVRAVGEEQRSEEPKRRVDTSVSWEALICVGSSKKRARKASSSDDEGGPRTLGGDGHRAEEASKDKE
CACGGCGTCTGGAATGCAGGATGAGGTCAGAGCGGTTGGCGAGGAGCAAAGGTCAGAGGAGCCAAAGCGCAGGGTGGATACTTCAGTGTCTTGGGAGGCGTTGATTTGTGTCGGATCGTCCAAGAAGAGAGCGAGGAAGG	CACGGCGTCTGGAATGCAGGATGAGGTCCGAGCGGTTGGCGAGGAGCAAAGGTCAGAGGAGCCAAAGCGCAGGGTGGATACTTCAGTGTCTTGGGAGGCGTTGATTTGTGTCGGATCGTCCAAGAAGAGAGCGAGGAAGG	2	WT	VKSATLSSTESTASGMQDEVRAVGEEQRSEEPKRRVDTSVSWEALICVGSSKKRARKASSSDDEGGPRTLGGDGHRAEEASKDKE	VKSATLSSTESTASGMQDEVRAVGEEQRSEEPKRRVDTSVSWEALICVGSSKKRARKASSSDDEGGPRTLGGDGHRAEEASKDKE
CACGGCGTCTGGAATGCAGGATGAGGTCAGAGCGGTTGGCGAGGAGCAAAGGTCAGAGGAGCCAAAGCGCAGGGTGGATACTTCAGTGTCTTGGGAGGCGTTGATTTGTGTCGGATCGTCCAAGAAGAGAGCGAGGAAGG	CACGGCGTCTGGAATGCAGGATGAGGTCAGAGCGGTTGGCGAGGAGCAAAGGTCAGAGGAGCCAAAGCGCAGGGTGGATACTTCAGTGTCTTGGGAGGCCTTGATTTGTGTCGGATCGTCCAAGAAGAGAGCGAGGAAGG	2	WT	VKSATLSSTESTASGMQDEVRAVGEEQRSEEPKRRVDTSVSWEALICVGSSKKRARKASSSDDEGGPRTLGGDGHRAEEASKDKE	VKSATLSSTESTASGMQDEVRAVGEEQRSEEPKRRVDTSVSWEALICVGSSKKRARKASSSDDEGGPRTLGGDGHRAEEASKDKE
CACGGCGTCTGGAATGCAGGATGAGGTCAGAGCGGTTGGCGAGGAGCAAAGGTCAGAGGAGCCAAAGCGCAGGGTGGATACTTCAGTGTCTTGGGAGGCGTTGATTTGTGTCGGATCGTCCAAGAAGAGAGCGAGGAAGG	CACGGCGTCTGGAATGCAGGATGAGGTCAGAGCGGTTGGCGAGGAGCAAAGGTCAGAGGAGCCAAAGCGCAGGGTGGATACTTCAGTGTCTTGGGAGGCGTTGATTTGTGTCGGCTCGTCCAAGAAGAGAGCGAGGAAGG	2	WT	VKSATLSSTESTASGMQDEVRAVGEEQRSEEPKRRVDTSVSWEALICVGSSKKRARKASSSDDEGGPRTLGGDGHRAEEASKDKE	VKSATLSSTESTASGMQDEVRAVGEEQRSEEPKRRVDTSVSWEALICVGSSKKRARKASSSDDEGGPRTLGGDGHRAEEASKDKE
CACGGCGTCTGGAATGCAGGATGAGGTCAGAGCGGTTGGCGAGGAGCAAAGGTCAGAGGAGCCAAAGCGCAGGGTGGATACTTCAGTGTCTTGGGAGGCGTTGATTTGTGTCGGATCGTCCAAGAAGAGAGCGAGGAAGG	CACGGCGTCTGGAATGCAGGATGAGGTCACAGCGGTTGGCGAGGAGCAAAGGTCAGAGGAGCCAAAGCGCAGGGTGGATACTTCAGTGTCTTGGGAGGCGTTGATTTGTGTCGGATCGTCCAAGAAGAGAGCGAGGAAGG	2	WT	VKSATLSSTESTASGMQDEVRAVGEEQRSEEPKRRVDTSVSWEALICVGSSKKRARKASSSDDEGGPRTLGGDGHRAEEASKDKE	VKSATLSSTESTASGMQDEVRAVGEEQRSEEPKRRVDTSVSWEALICVGSSKKRARKASSSDDEGGPRTLGGDGHRAEEASKDKE
CACGGCGTCTGGAATGCAGGATGAGGTCAGAGCGGTTGGCGAGGAGCAAAGGTCAGAGGAGCCAAAGCGCAGGGTGGATACTTCAGTGTCTTGGGAGGCGTTGATTTGTGTCGGATCGTCCAAGAAGAGAGCGAGGAAGG	CACGGCGTCTGGAATGCAGGATGAGGTCAGAGCGGTTGGCGAGGAGCAAAGGTCAGAGGAGCCAAAGCGCAGGGTTGATACTTCAGTGTCTTGGGAGGCGTTGATTTGTGTCGGATCGTCCAAGAAGAGAGCGGGGAAGG	2	WT	VKSATLSSTESTASGMQDEVRAVGEEQRSEEPKRRVDTSVSWEALICVGSSKKRARKASSSDDEGGPRTLGGDGHRAEEASKDKE	VKSATLSSTESTASGMQDEVRAVGEEQRSEEPKRRVDTSVSWEALICVGSSKKRARKASSSDDEGGPRTLGGDGHRAEEASKDKE
CACGGCGTCTGGAATGCAGGATGAGGTCAGAGCGGTTGGCGAGGAGCAAAGGTCAGAGGAGCCAAAGCGCAGGGTGGATACTTCAGTGTCTTGGGAGGCGTTGATTTGTGTCGGATCGTCCAAGAAGAGAGCGAGGAAGG	CACGGCGTCTGGAATGCAGGATGAGGTCAGAGGGGTTGGCGAGGAGCAAAGGTCAGAGGAGCCAAAGCGCAGGGTGGATACTTCAGTGTCTTGGGAGGCGTTGATTTGTGTCGGATCGTCCAAGAAGAGAGCGAGGAAGG	2	WT	VKSATLSSTESTASGMQDEVRAVGEEQRSEEPKRRVDTSVSWEALICVGSSKKRARKASSSDDEGGPRTLGGDGHRAEEASKDKE	VKSATLSSTESTASGMQDEVRAVGEEQRSEEPKRRVDTSVSWEALICVGSSKKRARKASSSDDEGGPRTLGGDGHRAEEASKDKE
CACGGCGTCTGGAATGCAGGATGAGGTCAGAGCGGTTGGCGAGGAGCAAAGGTCAGAGGAGCCAAAGCGCAGGGTGGATACTTCAGTGTCTTGGGAGGCGTTGATTTGTGTCGGATCGTCCAAGAAGAGAGCGAGGAAGG	CACGGCGTCTGGAATGCAGGATGAGGTCAGAGCGGTTGGCGAGGAGCAAAGGTCAGAGGAGCCAAAGCGCAGAGTGGATACTCCAGTGTCTTGGGAGGCGTTGATTTGTGTCGGATCGTCCAAGAAGAGAGCGAGGAAGG	2	WT	VKSATLSSTESTASGMQDEVRAVGEEQRSEEPKRRVDTSVSWEALICVGSSKKRARKASSSDDEGGPRTLGGDGHRAEEASKDKE	VKSATLSSTESTASGMQDEVRAVGEEQRSEEPKRRVDTSVSWEALICVGSSKKRARKASSSDDEGGPRTLGGDGHRAEEASKDKE
CACGGCGTCTGGAATGCAGGATGAGGTCAGAGCGGTTGGCGAGGAGCAAAGGTCAGAGGAGCCAAAGCGCAGGGTGGATACTTCAGTGTCTTGGGAGGCGTTGATTTGTGTCGGATCGTCCAAGAAGAGAGCGAGGAAGG	CACGGCGTCTGGAATGCAGGATGGGGTCAGAGCGGTTGGCGAGGAGCAAAGGTCAGAGGAGCCAAAGCGCAGGGTGGATACTTCAGTGTCTTGGGAGGCGTTGATTTGTGTCG------ACAAGAAGAGAGCGAGGAAGG	2	WT	VKSATLSSTESTASGMQDEVRAVGEEQRSEEPKRRVDTSVSWEALICVGSSKKRARKASSSDDEGGPRTLGGDGHRAEEASKDKE	VKSATLSSTESTASGMQDEVRAVGEEQRSEEPKRRVDTSVSWEALICVGSSKKRARKASSSDDEGGPRTLGGDGHRAEEASKDKE
CACGGCGTCTGGAATGCAGGATGAGGTCAGAGCGGTTGGCGAGGAGCAAAGGTCAGAGGAGCCAAAGCGCAGGGTGGATACTTCAGTGTCTTGGGAGGCGTTGATTTGTGTCGGATCGTCCAAGAAGAGAGCGAGGAAGG	CACGGCGTCTGGAATGCAGGATGAGGTCAGAGCGGTTGGCGAGGAGCAAAGGTCGGAGGAGCCAAAGCGCAGGGTGGATACTTCAGTGCCTTGGGAGGCGTTGATTTGTGTCGGATCGTCCAAGAAGAGAGCGAGGAAGG	2	WT	VKSATLSSTESTASGMQDEVRAVGEEQRSEEPKRRVDTSVSWEALICVGSSKKRARKASSSDDEGGPRTLGGDGHRAEEASKDKE	VKSATLSSTESTASGMQDEVRAVGEEQRSEEPKRRVDTSVSWEALICVGSSKKRARKASSSDDEGGPRTLGGDGHRAEEASKDKE
CACGGCGTCTGGAATGCAGGATGAGGTCAGAGCGGTTGGCGAGGAGCAAAGGTCAGAGGAGCCAAAGCGCAGGGTGGATACTTCAGTGTCTTGGGAGGCGTTGATTTGTGTCGGATCGTCCAAGAAGAGAGCGAGGAAGG	CACGGCGTCTGGAATGCAGGATGAGGTCAGAGCGGTTGGCGAGGAGCAAAGGTCAGAGGAGCCAAAGCGCAGGGTGGATACTTCAGTGTCATGAGAGGCGTTGATTTGTGTCGGATCGTCCAAGAAGAGAGCGAGGAAGG	2	WT	VKSATLSSTESTASGMQDEVRAVGEEQRSEEPKRRVDTSVSWEALICVGSSKKRARKASSSDDEGGPRTLGGDGHRAEEASKDKE	VKSATLSSTESTASGMQDEVRAVGEEQRSEEPKRRVDTSVSWEALICVGSSKKRARKASSSDDEGGPRTLGGDGHRAEEASKDKE
CACGGCGTCTGGAATGCAGGATGAGGTCAGAGCGGTTGGCGAGGAGCAAAGGTCAGAGGAGCCAAAGCGCAGGGTGGATACTTCAGTGTCTTGGGAGGCGTTGATTTGTGTCGGATCGTCCAAGAAGAGAGCGAGGAAGG	CACGGCGTCTGGAATGCAGGATGAGATCAGAGCGGTCGGCGAGGAGCAAAGGTCAGAGGAGCCAAAGCGCAGGGTGGATACTTCAGTGTCTTGGGAGGCGTTGATTTGTGTCGGATCGTCCAAGAAGAGAGCGAGGGAGG	2	WT	VKSATLSSTESTASGMQDEVRAVGEEQRSEEPKRRVDTSVSWEALICVGSSKKRARKASSSDDEGGPRTLGGDGHRAEEASKDKE	VKSATLSSTESTASGMQDEVRAVGEEQRSEEPKRRVDTSVSWEALICVGSSKKRARKASSSDDEGGPRTLGGDGHRAEEASKDKE
CACGGCGTCTGGAATGCAGGATGAGGTCAGAGCGGTTGGCGAGGAGCAAAGGTCAGAGGAGCCAAAGCGCAGGGTGGATACTTCAGTGTCTTGGGAGGCGTTGATTTGTGTCGGATCGTCCAAGAAGAGAGCGAGGAAGG	CACGGCATCTGGAATGCAGGATGAGGTCAGAGCGGTTGGCGAGGAGCAAAGGTCAGAGGAGCCAAAGCGCAGGGTGGATACTTCAGTGTCTTGGGAGGCGTTGATTCGTGTCGGATCGTCCAAGAAGAGAGCGAGGAAGG	2	WT	VKSATLSSTESTASGMQDEVRAVGEEQRSEEPKRRVDTSVSWEALICVGSSKKRARKASSSDDEGGPRTLGGDGHRAEEASKDKE	VKSATLSSTESTASGMQDEVRAVGEEQRSEEPKRRVDTSVSWEALICVGSSKKRARKASSSDDEGGPRTLGGDGHRAEEASKDKE
CACGGCGTCTGGAATGCAGGATGAGGTCAGAGCGGTTGGCGAGGAGCAAAGGTCAGAGGAGCCAAAGCGCAGGGTGGATACTTCAGTGTCTTGGGAGGCGTTGATTTGTGTCGGATCGTCCAAGAAGAGAGCGAGGAAGG	CACGGCGTCTGGAATGCAGGATGAGGTCAGAGCGGTCGGCGAGGAGCAAAGGTCAAAGGAGCCAAAGCGCAGGGTGGATACTTCAGTGTCTTGGGGGGCGTTGATTTGTGTCGGATCGTCCAAGAAGAGAGCGAGGAAGG	2	WT	VKSATLSSTESTASGMQDEVRAVGEEQRSEEPKRRVDTSVSWEALICVGSSKKRARKASSSDDEGGPRTLGGDGHRAEEASKDKE	VKSATLSSTESTASGMQDEVRAVGEEQRSEEPKRRVDTSVSWEALICVGSSKKRARKASSSDDEGGPRTLGGDGHRAEEASKDKE
CACGGCGTCTGGAATGCAGGATGAGGTCAGAGCGGTTGGCGAGGAGCAAAGGTCAGAGGAGCCAAAGCGCAGGGTGGATACTTCAGTGTCTTGGGAGGCGTTGATTTGTGTCGGATCGTCCAAGAAGAGAGCGAGGAAGG	CACGGCGTCTGGAATGCAGGATGAGGTCAGAGCGGTTGGCGAGGAGCAAAGGTCAGAGGAGCCAAAGCGCAGGGTGGATACTTCAGTGTCTTGGGAGGCGTTGATATGTGTCGGATCGTCCAAGAAGAGAGCGAGGAAGG	2	WT	VKSATLSSTESTASGMQDEVRAVGEEQRSEEPKRRVDTSVSWEALICVGSSKKRARKASSSDDEGGPRTLGGDGHRAEEASKDKE	VKSATLSSTESTASGMQDEVRAVGEEQRSEEPKRRVDTSVSWEALICVGSSKKRARKASSSDDEGGPRTLGGDGHRAEEASKDKE
CACGGCGTCTGGAATGCAGGATGAGGTCAGAGCGGTTGGCGAGGAGCAAAGGTCAGAGGAGCCAAAGCGCAGGGTGGATACTTCAGTGTCTTGGGAGGCGTTGATTTGTGTCGGATCGTCCAAGAAGAGAGCGAGGAAGG	CACGGCGTCTGGAATGCAGGATGAGGTCAGAGCGGTTGGCGAGGAGCAGAGGTCAGAGGAGCCAAGGCGCAGGGTGGATACTTCAGTGTCTTGGGAGGCGTTGATTTGTGTCGGATCGTCCAAGAAGAGAGCGAGGAAGG	2	WT	VKSATLSSTESTASGMQDEVRAVGEEQRSEEPKRRVDTSVSWEALICVGSSKKRARKASSSDDEGGPRTLGGDGHRAEEASKDKE	VKSATLSSTESTASGMQDEVRAVGEEQRSEEPKRRVDTSVSWEALICVGSSKKRARKASSSDDEGGPRTLGGDGHRAEEASKDKE
CACGGCGTCTGGAATGCAGGATGAGGTCAGAGCGGTTGGCGAGGAGCAAAGGTCAGAGGAGCCAAAGCGCAGGGTGGATACTTCAGTGTCTTGGGAGGCGTTGATTTGTGTCGGATCGTCCAAGAAGAGAGCGAGGAAGG	CACGGCGTCTGGAATGCAGGATGAGGTCAGAGCGGTTGGCGAGGGGCAAAGGTCAGAGGAGCCAAAGCGCAGGGTGGACACTTCAGTGTCTTGGGAGGCGTTGATTTGTGTCGGATCGTCCAAGAAGAGAGCGAGGAAGG	2	WT	VKSATLSSTESTASGMQDEVRAVGEEQRSEEPKRRVDTSVSWEALICVGSSKKRARKASSSDDEGGPRTLGGDGHRAEEASKDKE	VKSATLSSTESTASGMQDEVRAVGEEQRSEEPKRRVDTSVSWEALICVGSSKKRARKASSSDDEGGPRTLGGDGHRAEEASKDKE
CACGGCGTCTGGAATGCAGGATGAGGTCAGAGCGGTTGGCGAGGAGCAAAGGTCAGAGGAGCCAAAGCGCAGGGTGGATACTTCAGTGTCTTGGGAGGCGTTGATTTGTGTCGGATCGTCCAAGAAGAGAGCGAGGAAGG	CACGGCGTCGGGAATGCAGGATGAGGTCAGAGCGGTTGGCGAGGAGCAAAGGTCAGAGGAGCCAAAGCGCAGGGTGGATACTTCAGTGTCTTGGGAGGCGTTGATTTGTGTCGGATCGTCCAAGAAGAGAGCGAGGAAGG	2	WT	VKSATLSSTESTASGMQDEVRAVGEEQRSEEPKRRVDTSVSWEALICVGSSKKRARKASSSDDEGGPRTLGGDGHRAEEASKDKE	VKSATLSSTESTASGMQDEVRAVGEEQRSEEPKRRVDTSVSWEALICVGSSKKRARKASSSDDEGGPRTLGGDGHRAEEASKDKE
CACGGCGTCTGGAATGCAGGATGAGGTCAGAGCGGTTGGCGAGGAGCAAAGGTCAGAGGAGCCAAAGCGCAGGGTGGATACTTCAGTGTCTTGGGAGGCGTTGATTTGTGTCGGATCGTCCAAGAAGAGAGCGAGGAAGG	CACGGCGTCTGGAATGCAGGATGAGGTCAGAGCGGTTGGCGAGGAGCAAAGGTCAGAGGAGCCAAAGCGCAGGGTGGATATTTCAGTGTCTTGGGAGGCGCTGATTTGTGTCGGATCGTCCAAGAAGAGAGCGAGGGAGG	2	WT	VKSATLSSTESTASGMQDEVRAVGEEQRSEEPKRRVDTSVSWEALICVGSSKKRARKASSSDDEGGPRTLGGDGHRAEEASKDKE	VKSATLSSTESTASGMQDEVRAVGEEQRSEEPKRRVDTSVSWEALICVGSSKKRARKASSSDDEGGPRTLGGDGHRAEEASKDKE
CACGGCGTCTGGAATGCAGGATGAGGTCAGAGCGGTTGGCGAGGAGCAAAGGTCAGAGGAGCCAAAGCGCAGGGTGGATACTTCAGTGTCTTGGGAGGCGTTGATTTGTGTCGGATCGTCCAAGAAGAGAGCGAGGAAGG	CACGGCGTCTGGAATGCAGGATGAGGCCAGAGCGGTTGGCGAGGAGCAAAGGTCAGAGGAGCCAAAGCGCAGGGTGGATACTTCAGTGTCTTGGGAGGCGTTGATTTGTGTCGGATCGTCCAAGAAGAGAGCGAGGAATG	2	WT	VKSATLSSTESTASGMQDEVRAVGEEQRSEEPKRRVDTSVSWEALICVGSSKKRARKASSSDDEGGPRTLGGDGHRAEEASKDKE	VKSATLSSTESTASGMQDEVRAVGEEQRSEEPKRRVDTSVSWEALICVGSSKKRARKASSSDDEGGPRTLGGDGHRAEEASKDKE
CACGGCGTCTGGAATGCAGGATGAGGTCAGAGCGGTTGGCGAGGAGCAAAGGTCAGAGGAGCCAAAGCGCAGGGTGGATACTTCAGTGTCTTGGGAGGCGTTGATTTGTGTCGGATCGTCCAAGAAGAGAGCGAGGAAGG	CACGGCGTCTGGAGTGCAGGATGAGGTCAGAGCGGTTGGCGAGGAGCAAAGGTCAGAGGAGCCAAAGCGCAGGGTGGATACTTCAGTGTCTTGGGAGGCGTTGGTTTGTGTCGGATCGTCCAAGAAGAGAGCGAGGAAGG	2	WT	VKSATLSSTESTASGMQDEVRAVGEEQRSEEPKRRVDTSVSWEALICVGSSKKRARKASSSDDEGGPRTLGGDGHRAEEASKDKE	VKSATLSSTESTASGMQDEVRAVGEEQRSEEPKRRVDTSVSWEALICVGSSKKRARKASSSDDEGGPRTLGGDGHRAEEASKDKE
CACGGCGTCTGGAATGCAGGATGAGGTCAGAGCGGTTGGCGAGGAGCAAAGGTCAGAGGAGCCAAAGCGCAGGGTGGATACTTCAGTGTCTTGGGAGGCGTTGATTTGTGTCGGATCGTCCAAGAAGAGAGCGAGGAAGG	CACGGCGTCTGGAACGCAGGATGAGGTCAGAGCGGTTGGCGAGGAGCAAAGGTCAGAGGAGCCAAAGCGCAGGGTGGACACTTCAGTGTCTTGGGAGGCGTTGATTTGTGTCGGATCGTCCAAGGAGAGAGCGAGGAAGG	2	WT	VKSATLSSTESTASGMQDEVRAVGEEQRSEEPKRRVDTSVSWEALICVGSSKKRARKASSSDDEGGPRTLGGDGHRAEEASKDKE	VKSATLSSTESTASGMQDEVRAVGEEQRSEEPKRRVDTSVSWEALICVGSSKKRARKASSSDDEGGPRTLGGDGHRAEEASKDKE
CACGGCGTCTGGAATGCAGGATGAGGTCAGAGCGGTTGGCGAGGAGCAAAGGTCAGAGGAGCCAAAGCGCAGGGTGGATACTTCAGTGTCTTGGGAGGCGTTGATTTGTGTCGGATCGTCCAAGAAGAGAGCGAGGAAGG	CACGGCGTCTGGAATGCAGGATGAGGTCAGAGCGGTTGGCGAGGAGCAAAGGTCAGGGGAGCCAAAGCGCAGGGTGGATACTTCAGTGTCTTGGGAGGCGTTGATTTGTGTCGGATCGCCCAAGAAGAGAGCGAGGAAGG	2	WT	VKSATLSSTESTASGMQDEVRAVGEEQRSEEPKRRVDTSVSWEALICVGSSKKRARKASSSDDEGGPRTLGGDGHRAEEASKDKE	VKSATLSSTESTASGMQDEVRAVGEEQRSEEPKRRVDTSVSWEALICVGSSKKRARKASSSDDEGGPRTLGGDGHRAEEASKDKE
CACGGCGTCTGGAATGCAGGATGAGGTCAGAGCGGTTGGCGAGGAGCAAAGGTCAGAGGAGCCAAAGCGCAGGGTGGATACTTCAGTGTCTTGGGAGGCGTTGATTTGTGTCGGATCGTCCAAGAAGAGAGCGAGGAAGG	CACGGCGTCTGGAATGCAAGATGAGGTCAGAGCGGTTGGCGAGGAGCAAAGGTCAGAGGAGCCAAAGCGCAGGGTGGATACTTCAGTGCCTTGGGAGGCGTTGATTTGTGTCGGATCGTCCAAGAAGAGAGCGAGGAAGG	2	WT	VKSATLSSTESTASGMQDEVRAVGEEQRSEEPKRRVDTSVSWEALICVGSSKKRARKASSSDDEGGPRTLGGDGHRAEEASKDKE	VKSATLSSTESTASGMQDEVRAVGEEQRSEEPKRRVDTSVSWEALICVGSSKKRARKASSSDDEGGPRTLGGDGHRAEEASKDKE
CACGGCGTCTGGAATGCAGGATGAGGTCAGAGCGGTTGGCGAGGAGCAAAGGTCAGAGGAGCCAAAGCGCAGGGTGGATACTTCAGTGTCTTGGGAGGCGTTGATTTGTGTCGGATCGTCCAAGAAGAGAGCGAGGAAGG	CACGGCGTCTGGAATGCAGGATGAGGTCAGAGCGGTTGGCGAGGCGCAAAGGTCAGAGGAGCCAAAGCGCAGGGTGGATACTTCAGTGTCTTGGGAGGCGTTGATTTGTGTCGGATCGTCCAAGAAGAGAGCGAGGAAGG	2	WT	VKSATLSSTESTASGMQDEVRAVGEEQRSEEPKRRVDTSVSWEALICVGSSKKRARKASSSDDEGGPRTLGGDGHRAEEASKDKE	VKSATLSSTESTASGMQDEVRAVGEEQRSEEPKRRVDTSVSWEALICVGSSKKRARKASSSDDEGGPRTLGGDGHRAEEASKDKE
CACGGCGTCTGGAATGCAGGATGAGGTCAGAGCGGTTGGCGAGGAGCAAAGGTCAGAGGAGCCAAAGCGCAGGGTGGATACTTCAGTGTCTTGGGAGGCGTTGATTTGTGTCGGATCGTCCAAGAAGAGAGCGAGGAAGG	CACGGCGTCTGGAATGCAGGATGAGGTCAGAGCGGTTGGCGAGGAGCAAAGGCCAGAGGAGCCGAAGCGCAGGGTGGATACTTCAGTGTCTTGGGAGGCGTTGATTTGTGTCGGATCGTCCAAGGAGAGAGCGAGGAAGG	2	WT	VKSATLSSTESTASGMQDEVRAVGEEQRSEEPKRRVDTSVSWEALICVGSSKKRARKASSSDDEGGPRTLGGDGHRAEEASKDKE	VKSATLSSTESTASGMQDEVRAVGEEQRSEEPKRRVDTSVSWEALICVGSSKKRARKASSSDDEGGPRTLGGDGHRAEEASKDKE
CACGGCGTCTGGAATGCAGGATGAGGTCAGAGCGGTTGGCGAGGAGCAAAGGTCAGAGGAGCCAAAGCGCAGGGTGGATACTTCAGTGTCTTGGGAGGCGTTGATTTGTGTCGGATCGTCCAAGAAGAGAGCGAGGAAGG	CACGGCGTCTGGAATGCAGGATGAGGTCAGAGCGGTTGGCGAGGAGCAAAGGTCAGAGCAGCCAAAGCGCAGGGTGGATACTTCAGTGTCTTGGGAGGCGTTGATTTGTGTCGGATCGTCCAAGAAGAGAGCGAGGAAGG	2	WT	VKSATLSSTESTASGMQDEVRAVGEEQRSEEPKRRVDTSVSWEALICVGSSKKRARKASSSDDEGGPRTLGGDGHRAEEASKDKE	VKSATLSSTESTASGMQDEVRAVGEEQRSEEPKRRVDTSVSWEALICVGSSKKRARKASSSDDEGGPRTLGGDGHRAEEASKDKE
CACGGCGTCTGGAATGCAGGATGAGGTCAGAGCGGTTGGCGAGGAGCAAAGGTCAGAGGAGCCAAAGCGCAGGGTGGATACTTCAGTGTCTTGGGAGGCGTTGATTTGTGTCGGATCGTCCAAGAAGAGAGCGAGGAAGG	CACGGCGTCTGGAATGCAGGATGAGGTCAGAGCGGTTGGCGAGGAGCAAAGGTCAGAGGAGCCAAAGCGCAGGGTGGATACTTCAGTGCCTTGGGAGGCGTTGATTTGTATCGGATCGTCCAAGAAGAGAGCGAGGAAGG	2	WT	VKSATLSSTESTASGMQDEVRAVGEEQRSEEPKRRVDTSVSWEALICVGSSKKRARKASSSDDEGGPRTLGGDGHRAEEASKDKE	VKSATLSSTESTASGMQDEVRAVGEEQRSEEPKRRVDTSVSWEALICVGSSKKRARKASSSDDEGGPRTLGGDGHRAEEASKDKE
CACGGCGTCTGGAATGCAGGATGAGGTCAGAGCGGTTGGCGAGGAGCAAAGGTCAGAGGAGCCAAAGCGCAGGGTGGATACTTCAGTGTCTTGGGAGGCGTTGATTTGTGTCGGATCGTCCAAGAAGAGAGCGAGGAAGG	CACGGCGTCTGGAACGCAGGATGAGGCCAGAGCGGTTGGCGAGGAGCAAAGGTCAGAGGAGCCAAAGCGCAGGGTGGATACTTCAGTGTCTTGGGAGGCGTTGATTTGTGTCGGATCGTCCAAGAAGAGAGCGAGGAAGG	2	WT	VKSATLSSTESTASGMQDEVRAVGEEQRSEEPKRRVDTSVSWEALICVGSSKKRARKASSSDDEGGPRTLGGDGHRAEEASKDKE	VKSATLSSTESTASGMQDEVRAVGEEQRSEEPKRRVDTSVSWEALICVGSSKKRARKASSSDDEGGPRTLGGDGHRAEEASKDKE
CACGGCGTCTGGAATGCAGGATGAGGTCAGAGCGGTTGGCGAGGAGCAAAGGTCAGAGGAGCCAAAGCGCAGGGTGGATACTTCAGTGTCTTGGGAGGCGTTGATTTGTGTCGGATCGTCCAAGAAGAGAGCGAGGAAGG	CACGGCGTCTGGAATGCAAGATGAGGTCAGAGCGGTTGGCGAGGAGCAAAGGTCAGAGGAGCCAAAGCGCAGGGTGGATACTTCTGTGTCTTGGGAGGCGTTGATTTGTGTCGGATCGTCCAAGAAGAGAGCGAGGAAGG	2	WT	VKSATLSSTESTASGMQDEVRAVGEEQRSEEPKRRVDTSVSWEALICVGSSKKRARKASSSDDEGGPRTLGGDGHRAEEASKDKE	VKSATLSSTESTASGMQDEVRAVGEEQRSEEPKRRVDTSVSWEALICVGSSKKRARKASSSDDEGGPRTLGGDGHRAEEASKDKE
CACGGCGTCTGGAATGCAGGATGAGGTCAGAGCGGTTGGCGAGGAGCAAAGGTCAGAGGAGCCAAAGCGCAGGGTGGATACTTCAGTGTCTTGGGAGGCGTTGATTTGTGTCGGATCGTCCAAGAAGAGAGCGAGGAAGG	CACGGCGTCTGGAATGCGGGATGAGGTCAGAGCGGTTGGCGAGGAGCAAAGGTCAGAGGAGCCAAGGCGCAGGGTGGATACTTCAGTGTCTTGGGAGGCGTTGATTTGTGTCGGATCGTCCAAGAAGAGAGCGAGGAAGT	2	WT	VKSATLSSTESTASGMQDEVRAVGEEQRSEEPKRRVDTSVSWEALICVGSSKKRARKASSSDDEGGPRTLGGDGHRAEEASKDKE	VKSATLSSTESTASGMQDEVRAVGEEQRSEEPKRRVDTSVSWEALICVGSSKKRARKASSSDDEGGPRTLGGDGHRAEEASKDKE
CACGGCGTCTGGAATGCAGGATGAGGTCAGAGCGGTTGGCGAGGAGCAAAGGTCAGAGGAGCCAAAGCGCAGGGTGGATACTTCAGTGTCTTGGGAGGCGTTGATTTGTGTCGGATCGTCCAAGAAGAGAGCGAGGAAGG	CACGGCGTCTGGAATGCAGGATGAGGTCAGAGCGGTTGGCGAGGAGCAAAGGTCAGAAGAGCCAAAGCGCAGGGTGGATACTTCAGTATCTTGGGAGGCGTTGATTTGTGTCGGATCGTCCAAGAAGAGAGCGAGGAAGG	2	WT	VKSATLSSTESTASGMQDEVRAVGEEQRSEEPKRRVDTSVSWEALICVGSSKKRARKASSSDDEGGPRTLGGDGHRAEEASKDKE	VKSATLSSTESTASGMQDEVRAVGEEQRSEEPKRRVDTSVSWEALICVGSSKKRARKASSSDDEGGPRTLGGDGHRAEEASKDKE
CACGGCGTCTGGAATGCAGGATGAGGTCAGAGCGGTTGGCGAGGAGCAAAGGTCAGAGGAGCCAAAGCGCAGGGTGGATACTTCAGTGTCTTGGGAGGCGTTGATTTGTGTCGGATCGTCCAAGAAGAGAGCGAGGAAGG	CACGGCGTCTGGAATGCAGGATGAGGACAGAGCGGTTGGCGAGGAGCAAAGGTCAGAGGAGCCAAAGCGCAGGGTGGATACTTCAGTGTCTTGGGAGGCGTTGATTTGTGTCGGATCGTCCAAGAAGAGAGCGAGGGAGG	2	WT	VKSATLSSTESTASGMQDEVRAVGEEQRSEEPKRRVDTSVSWEALICVGSSKKRARKASSSDDEGGPRTLGGDGHRAEEASKDKE	VKSATLSSTESTASGMQDEVRAVGEEQRSEEPKRRVDTSVSWEALICVGSSKKRARKASSSDDEGGPRTLGGDGHRAEEASKDKE
CACGGCGTCTGGAATGCAGGATGAGGTCAGAGCGGTTGGCGAGGAGCAAAGGTCAGAGGAGCCAAAGCGCAGGGTGGATACTTCAGTGTCTTGGGAGGCGTTGATTTGTGTCGGATCGTCCAAGAAGAGAGCGAGGAAGG	CACGGCGTCTGGAATGCAGGATGAGGTCAGAGCGGTCGGCGAGGAGCAAAGGTCAGAGGAGCCAAAGCGCAGGGTGGATACTTCAGTGTCTTGGGAGGCGTTGATTTGTGTCGGATCGTCCAAGGAGAGAGCGAGGAAGG	2	WT	VKSATLSSTESTASGMQDEVRAVGEEQRSEEPKRRVDTSVSWEALICVGSSKKRARKASSSDDEGGPRTLGGDGHRAEEASKDKE	VKSATLSSTESTASGMQDEVRAVGEEQRSEEPKRRVDTSVSWEALICVGSSKKRARKASSSDDEGGPRTLGGDGHRAEEASKDKE
CACGGCGTCTGGAATGCAGGATGAGGTCAGAGCGGTTGGCGAGGAGCAAAGGTCAGAGGAGCCAAAGCGCAGGGTGGATACTTCAGTGTCTTGGGAGGCGTTGATTTGTGTCGGATCGTCCAAGAAGAGAGCGAGGAAGG	CACGGCGTCTGGAATGCAGGATGAGGTCAGAGCGGTCGGCGAGGAGCAAAGGTCAGAGGAGCCAAAGCGCAGGGTGGATACCTCAGTGTCTTGGGAGGCGTTGATTTGTGTCGGATCGTCCAAGAAGAGAGCGAGGAAGG	2	WT	VKSATLSSTESTASGMQDEVRAVGEEQRSEEPKRRVDTSVSWEALICVGSSKKRARKASSSDDEGGPRTLGGDGHRAEEASKDKE	VKSATLSSTESTASGMQDEVRAVGEEQRSEEPKRRVDTSVSWEALICVGSSKKRARKASSSDDEGGPRTLGGDGHRAEEASKDKE
CACGGCGTCTGGAATGCAGGATGAGGTCAGAGCGGTTGGCGAGGAGCAAAGGTCAGAGGAGCCAAAGCGCAGGGTGGATACTTCAGTGTCTTGGGAGGCGTTGATTTGTGTCGGATCGTCCAAGAAGAGAGCGAGGAAGG	CACGGCGTCTGGAATGCAGGATGAGGTCAGAGCGGTTGGCGAGGAGC-AAGGTCAGGGGAGCCAAAGCGCAGGGTGGATACTTCAGTGTCTTGGGAGGCGTTGATTTGTGTCGGATCGTCCAAGAAGAGAGCGAGGAAGG	2	WT	VKSATLSSTESTASGMQDEVRAVGEEQRSEEPKRRVDTSVSWEALICVGSSKKRARKASSSDDEGGPRTLGGDGHRAEEASKDKE	VKSATLSSTESTASGMQDEVRAVGEEQRSEEPKRRVDTSVSWEALICVGSSKKRARKASSSDDEGGPRTLGGDGHRAEEASKDKE
CACGGCGTCTGGAATGCAGGATGAGGTCAGAGCGGTTGGCGAGGAGCAAAGGTCAGAGGAGCCAAAGCGCAGGGTGGATACTTCAGTGTCTTGGGAGGCGTTGATTTGTGTCGGATCGTCCAAGAAGAGAGCGAGGAAGG	CACGGCGTCTGGAGTGCAGGATGAGGTCAGAGCAGTTGGCGAGGAGCAAAGGTCAGAGGAGCCAAAGCGCAGGGTGGATACTTCAGTGTCTTGGGAGGCGTTGATTTGTGTCGGATCGTCCAAGAAGAGAGCGAGGAAGG	2	WT	VKSATLSSTESTASGMQDEVRAVGEEQRSEEPKRRVDTSVSWEALICVGSSKKRARKASSSDDEGGPRTLGGDGHRAEEASKDKE	VKSATLSSTESTASGMQDEVRAVGEEQRSEEPKRRVDTSVSWEALICVGSSKKRARKASSSDDEGGPRTLGGDGHRAEEASKDKE
CACGGCGTCTGGAATGCAGGATGAGGTCAGAGCGGTTGGCGAGGAGCAAAGGTCAGAGGAGCCAAAGCGCAGGGTGGATACTTCAGTGTCTTGGGAGGCGTTGATTTGTGTCGGATCGTCCAAGAAGAGAGCGAGGAAGG	CACGGCGTCTGGAATGCAGGATGAGGTCAGAGCGGTTGGCGAGGAGCAAAGGTCAGAGGAGCCAAAGCGCAGGGTGGATACTTCAGTGTCTTGGGAGGCGTTGAATTGTGGCGGATCGTCCAAGAAGAGAGCGAGGAAGG	2	WT	VKSATLSSTESTASGMQDEVRAVGEEQRSEEPKRRVDTSVSWEALICVGSSKKRARKASSSDDEGGPRTLGGDGHRAEEASKDKE	VKSATLSSTESTASGMQDEVRAVGEEQRSEEPKRRVDTSVSWEALICVGSSKKRARKASSSDDEGGPRTLGGDGHRAEEASKDKE
CACGGCGTCTGGAATGCAGGATGAGGTCAGAGCGGTTGGCGAGGAGCAAAGGTCAGAGGAGCCAAAGCGCAGGGTGGATACTTCAGTGTCTTGGGAGGCGTTGATTTGTGTCGGATCGTCCAAGAAGAGAGCGAGGAAGG	CACGGCGTCTGGAATGCAGGATGAGGTCAGAGCGGTTGGCGAGGAGCAAAGGTCAGAGGAGCCAAAGCGCAGGGTGGATACTTCAGTGTCTTGGGAGGCGTCGATCTGTGTCGGATCGTCCAAGAAGAGAGCGAGGAAGG	2	WT	VKSATLSSTESTASGMQDEVRAVGEEQRSEEPKRRVDTSVSWEALICVGSSKKRARKASSSDDEGGPRTLGGDGHRAEEASKDKE	VKSATLSSTESTASGMQDEVRAVGEEQRSEEPKRRVDTSVSWEALICVGSSKKRARKASSSDDEGGPRTLGGDGHRAEEASKDKE
CACGGCGTCTGGAATGCAGGATGAGGTCAGAGCGGTTGGCGAGGAGCAAAGGTCAGAGGAGCCAAAGCGCAGGGTGGATACTTCAGTGTCTTGGGAGGCGTTGATTTGTGTCGGATCGTCCAAGAAGAGAGCGAGGAAGG	CACGGCGTCTGGAATGCGGGATGAGGCCAGAGCGGTTGGCGAGGAGCAAAGGTCAGAGGAGCCAAAGCGCAGGGTGGATACTTCAGTGTCTTGGGAGGCGTTGATTTGTGTCGGATCGTCCAAGAAGAGAGCGAGGAAGG	2	WT	VKSATLSSTESTASGMQDEVRAVGEEQRSEEPKRRVDTSVSWEALICVGSSKKRARKASSSDDEGGPRTLGGDGHRAEEASKDKE	VKSATLSSTESTASGMQDEVRAVGEEQRSEEPKRRVDTSVSWEALICVGSSKKRARKASSSDDEGGPRTLGGDGHRAEEASKDKE
CACGGCGTCTGGAATGCAGGATGAGGTCAGAGCGGTTGGCGAGGAGCAAAGGTCAGAGGAGCCAAAGCGCAGGGTGGATACTTCAGTGTCTTGGGAGGCGTTGATTTGTGTCGGATCGTCCAAGAAGAGAGCGAGGAAGG	CACGGCGTCTGGAATGCAGGATGAGGTCAGAGCGGTTGGCGAGGAGCAAAGGTCGGAGGAGCCAAAGCGCAGGGTGGATACTTCAGTGTCTTGGGAGGCGTTGATTTGTGTCGGATCGTCCAAGGAGAGAGCGAGGAAGG	2	WT	VKSATLSSTESTASGMQDEVRAVGEEQRSEEPKRRVDTSVSWEALICVGSSKKRARKASSSDDEGGPRTLGGDGHRAEEASKDKE	VKSATLSSTESTASGMQDEVRAVGEEQRSEEPKRRVDTSVSWEALICVGSSKKRARKASSSDDEGGPRTLGGDGHRAEEASKDKE
CACGGCGTCTGGAATGCAGGATGAGGTCAGAGCGGTTGGCGAGGAGCAAAGGTCAGAGGAGCCAAAGCGCAGGGTGGATACTTCAGTGTCTTGGGAGGCGTTGATTTGTGTCGGATCGTCCAAGAAGAGAGCGAGGAAGG	CACGGCGTCTGGAATGCAGGACGAGGTCAGAGCGGTTGGCGAGGAGCAAAGGTCAGAGGAGCCAAAGCGCAGGGTGGATACTTCAGTGTCTGGGGAGGCGTTGATTTGTGTCGGATCGTCCAAGGAGAGAGCGAGGAAGG	2	WT	VKSATLSSTESTASGMQDEVRAVGEEQRSEEPKRRVDTSVSWEALICVGSSKKRARKASSSDDEGGPRTLGGDGHRAEEASKDKE	VKSATLSSTESTASGMQDEVRAVGEEQRSEEPKRRVDTSVSWEALICVGSSKKRARKASSSDDEGGPRTLGGDGHRAEEASKDKE
CACGGCGTCTGGAATGCAGGATGAGGTCAGAGCGGTTGGCGAGGAGCAAAGGTCAGAGGAGCCAAAGCGCAGGGTGGATACTTCAGTGTCTTGGGAGGCGTTGATTTGTGTCGGATCGTCCAAGAAGAGAGCGAGGAAGG	CACGGCGTCTGGAATGCAGGATGAGGTCAGAGCGGTTGGCGAGGAGCAAAGGTCAGAGGAGCCAAAGCGCAGGGTGGATACTTCAGTGTCTTGGGAGGCGTTGATTTGTGTCGGATCGTCCAAAAAGAGAGCGAGGAAGG	2	WT	VKSATLSSTESTASGMQDEVRAVGEEQRSEEPKRRVDTSVSWEALICVGSSKKRARKASSSDDEGGPRTLGGDGHRAEEASKDKE	VKSATLSSTESTASGMQDEVRAVGEEQRSEEPKRRVDTSVSWEALICVGSSKKRARKASSSDDEGGPRTLGGDGHRAEEASKDKE
CACGGCGTCTGGAATGCAGGATGAGGTCAGAGCGGTTGGCGAGGAGCAAAGGTCAGAGGAGCCAAAGCGCAGGGTGGATACTTCAGTGTCTTGGGAGGCGTTGATTTGTGTCGGATCGTCCAAGAAGAGAGCGAGGAAGG	CACGGCGTCGGGAATGCAGGATGAGGTCAGAGCGGTTGGCGAGGAGCAAAGGTCAGAGGAGCCAAAGCGCAGGGTGGACACTTCAGTGTCTTGGGAGGCGTTGATTTGTGTCGGATCGTCCAAGAAGAGAGCGAGGAAGG	2	WT	VKSATLSSTESTASGMQDEVRAVGEEQRSEEPKRRVDTSVSWEALICVGSSKKRARKASSSDDEGGPRTLGGDGHRAEEASKDKE	VKSATLSSTESTASGMQDEVRAVGEEQRSEEPKRRVDTSVSWEALICVGSSKKRARKASSSDDEGGPRTLGGDGHRAEEASKDKE
CACGGCGTCTGGAATGCAGGATGAGGTCAGAGCGGTTGGCGAGGAGCAAAGGTCAGAGGAGCCAAAGCGCAGGGTGGATACTTCAGTGTCTTGGGAGGCGTTGATTTGTGTCGGATCGTCCAAGAAGAGAGCGAGGAAGG	CACGGCGTCTGGAATGCAGGATTAGGTCAGAGCGGTTGGCGAGGAGCAAAGGTCAGAGGAGCCAAAGCGCAGGGTGGATACTTCAGTGTCTTGGGAGGCGTTGATTTGTGTCGGATCGCCCAAGAAGAGAGCGAGGAAGG	2	WT	VKSATLSSTESTASGMQDEVRAVGEEQRSEEPKRRVDTSVSWEALICVGSSKKRARKASSSDDEGGPRTLGGDGHRAEEASKDKE	VKSATLSSTESTASGMQDEVRAVGEEQRSEEPKRRVDTSVSWEALICVGSSKKRARKASSSDDEGGPRTLGGDGHRAEEASKDKE
CACGGCGTCTGGAATGCAGGATGAGGTCAGAGCGGTTGGCGAGGAGCAAAGGTCAGAGGAGCCAAAGCGCAGGGTGGATACTTCAGTGTCTTGGGAGGCGTTGATTTGTGTCGGATCGTCCAAGAAGAGAGCGAGGAAGG	CACGGCGTCTGGAATGCAGGATGAGGTCAGAGCGGTTGGCGAGGAGCAAA-GTCAGAGGAGCCAAAGCGCAGGGTGGATACTTCAGTGTCTTGGGAGGCGTTGATTTGTGTCGGATCGTCCAAGAAGAGAGCGAGGAAGG	2	WT	VKSATLSSTESTASGMQDEVRAVGEEQRSEEPKRRVDTSVSWEALICVGSSKKRARKASSSDDEGGPRTLGGDGHRAEEASKDKE	VKSATLSSTESTASGMQDEVRAVGEEQRSEEPKRRVDTSVSWEALICVGSSKKRARKASSSDDEGGPRTLGGDGHRAEEASKDKE
CACGGCGTCTGGAATGCAGGATGAGGTCAGAGCGGTTGGCGAGGAGCAAAGGTCAGAGGAGCCAAAGCGCAGGGTGGATACTTCAGTGTCTTGGGAGGCGTTGATTTGTGTCGGATCGTCCAAGAAGAGAGCGAGGAAGG	CACGGCGTCTGGAATGCAGGATGAGGTCAGAGCGGTTGGCGAGGAGCAAAGGTCAGAGGAGCCAAAGCGCAGGGTGGGTACTTCAGTGCCTTGGGAGGCGTTGATTTGTGTCGGATCGTCCAAGAAGAGAGCGAGGAAGG	2	WT	VKSATLSSTESTASGMQDEVRAVGEEQRSEEPKRRVDTSVSWEALICVGSSKKRARKASSSDDEGGPRTLGGDGHRAEEASKDKE	VKSATLSSTESTASGMQDEVRAVGEEQRSEEPKRRVDTSVSWEALICVGSSKKRARKASSSDDEGGPRTLGGDGHRAEEASKDKE
CACGGCGTCTGGAATGCAGGATGAGGTCAGAGCGGTTGGCGAGGAGCAAAGGTCAGAGGAGCCAAAGCGCAGGGTGGATACTTCAGTGTCTTGGGAGGCGTTGATTTGTGTCGGATCGTCCAAGAAGAGAGCGAGGAAGG	CACGGCGTCTGGAATGCAGGATGAGGTCAGAGCGGTTGGCGAGGAGCAAAGGTCAGAGGAGCTAAAGCGCGGGGTGGATACTTCAGTGTCTTGGGAGGCGTTGATTTGTGTCGGATCGTCCAAGAAGAGAGCGAGGAAGG	2	WT	VKSATLSSTESTASGMQDEVRAVGEEQRSEEPKRRVDTSVSWEALICVGSSKKRARKASSSDDEGGPRTLGGDGHRAEEASKDKE	VKSATLSSTESTASGMQDEVRAVGEEQRSEEPKRRVDTSVSWEALICVGSSKKRARKASSSDDEGGPRTLGGDGHRAEEASKDKE
CACGGCGTCTGGAATGCAGGATGAGGTCAGAGCGGTTGGCGAGGAGCAAAGGTCAGAGGAGCCAAAGCGCAGGGTGGATACTTCAGTGTCTTGGGAGGCGTTGATTTGTGTCGGATCGTCCAAGAAGAGAGCGAGGAAGG	CACGGCGTCTGGAATGCAGGATGAGGTCAGAGCGGTTGGCGAGGAGCAAAGGTCAGAGGAGCCAAAGCGCAGGGTGGATACTTCAGTGTCTCGGGAGGCGTTGATTTGTGTCGGATCGTCCAAGAAGAGGGCGAGGAAGG	2	WT	VKSATLSSTESTASGMQDEVRAVGEEQRSEEPKRRVDTSVSWEALICVGSSKKRARKASSSDDEGGPRTLGGDGHRAEEASKDKE	VKSATLSSTESTASGMQDEVRAVGEEQRSEEPKRRVDTSVSWEALICVGSSKKRARKASSSDDEGGPRTLGGDGHRAEEASKDKE
CACGGCGTCTGGAATGCAGGATGAGGTCAGAGCGGTTGGCGAGGAGCAAAGGTCAGAGGAGCCAAAGCGCAGGGTGGATACTTCAGTGTCTTGGGAGGCGTTGATTTGTGTCGGATCGTCCAAGAAGAGAGCGAGGAAGG	CACGGCGTCTGGAATGCAGGATGAGGTCAGAGCGGTTGGCGAGGAGCAAAGATCAGAGGAGCCAAAGCGCAGTGTGGATACTTCAGTGTCTTGGGAGGCGTTGATTTGTGTCGGATCGTCCAAGAAGAGAGCGAGGAAGG	2	WT	VKSATLSSTESTASGMQDEVRAVGEEQRSEEPKRRVDTSVSWEALICVGSSKKRARKASSSDDEGGPRTLGGDGHRAEEASKDKE	VKSATLSSTESTASGMQDEVRAVGEEQRSEEPKRRVDTSVSWEALICVGSSKKRARKASSSDDEGGPRTLGGDGHRAEEASKDKE
CACGGCGTCTGGAATGCAGGATGAGGTCAGAGCGGTTGGCGAGGAGCAAAGGTCAGAGGAGCCAAAGCGCAGGGTGGATACTTCAGTGTCTTGGGAGGCGTTGATTTGTGTCGGATCGTCCAAGAAGAGAGCGAGGAAGG	CACGGCGTCTGGAATGCAGGATGGGGTCAGAGCGGTTGGCGAGGAGCAAAGGTCAGAGGAGCCAAAGCGCAGGGTGGGTACTTCAGTGTCTTGGGAGGCGTTGATTTGTGTCGGATCGTCCAAGAAGAGAGCGAGGAAGG	2	WT	VKSATLSSTESTASGMQDEVRAVGEEQRSEEPKRRVDTSVSWEALICVGSSKKRARKASSSDDEGGPRTLGGDGHRAEEASKDKE	VKSATLSSTESTASGMQDEVRAVGEEQRSEEPKRRVDTSVSWEALICVGSSKKRARKASSSDDEGGPRTLGGDGHRAEEASKDKE
CACGGCGTCTGGAATGCAGGATGAGGTCAGAGCGGTTGGCGAGGAGCAAAGGTCAGAGGAGCCAAAGCGCAGGGTGGATACTTCAGTGTCTTGGGAGGCGTTGATTTGTGTCGGATCGTCCAAGAAGAGAGCGAGGAAGG	CACGGCGTCTGGAATGCAGGATGAGGTCAGAGCGGTCGGCGAGGAGCAAAGGTCAGAGGAGCCAAAGCGCAGAGTGGATACTTCAGTGTCTTGGGAGGCGTTGATTTGTGTCGGATCGTCCAAGAAGAGAGCGAGGAAGG	2	WT	VKSATLSSTESTASGMQDEVRAVGEEQRSEEPKRRVDTSVSWEALICVGSSKKRARKASSSDDEGGPRTLGGDGHRAEEASKDKE	VKSATLSSTESTASGMQDEVRAVGEEQRSEEPKRRVDTSVSWEALICVGSSKKRARKASSSDDEGGPRTLGGDGHRAEEASKDKE

## Sheet: A4-CCL4+CR-PMUT
Reference	Target sequence	Read count	Type	TargetAA	ReferenceAA
CACGGCGTCTGGAATGCAGGATGAGGTCAGAGCGGTTGGCGAGGAGCAAAGGTCAGAGGAGCCAAAGCGCAGGGTGGATACTTCAGTGTCTTGGGAGGCGTTGATTTGTGTCGGATCGTCCAAGAAGAGAGCGAGGAAGG	CACGGCGTCTGGAATGCAGGATGAGGTCAGAGCGGTTGGCGAGGAGCAAAGGTCAGAGGAGCCAAAGCGCAGGGTGGATACTTCAGTGTCTTGGGAGGCGTTGATTTGTGTCGGATCGTCCAAGAAGAGAGCGAGGAAGG	18458	WT	VKSATLSSTESTASGMQDEVRAVGEEQRSEEPKRRVDTSVSWEALICVGSSKKRARKASSSDDEGGPRTLGGDGHRAEEASKDKE	VKSATLSSTESTASGMQDEVRAVGEEQRSEEPKRRVDTSVSWEALICVGSSKKRARKASSSDDEGGPRTLGGDGHRAEEASKDKE
CACGGCGTCTGGAATGCAGGATGAGGTCAGAGCGGTTGGCGAGGAGCAAAGGTCAGAGGAGCCAAAGCGCAGGGTGGATACTTCAGTGTCTTGGGAGGCGTTGATTTGTGTCGGATCGTCCAAGAAGAGAGCGAGGAAGG	CACGGCGTCTGGAATGCAGGATGAGGTCAGAGCGGTTGGCGAGGAGCAAAGGTCAGAGGAGCCAAAGCGCAGGGTGGATGCTGCAGTGGCTTGGGAGGCGTTGATTTGTGTCGGAGCGGCCAAGAAGAGAGCGAGGAAGG	70	Base change	VKSATLSSTESTASGMQDEVRAVGEEQRSEEPKRRVDAAVAWEALICVGAAKKRARKASSSDDEGGPRTLGGDGHRAEEASKDKE	VKSATLSSTESTASGMQDEVRAVGEEQRSEEPKRRVDTSVSWEALICVGSSKKRARKASSSDDEGGPRTLGGDGHRAEEASKDKE
CACGGCGTCTGGAATGCAGGATGAGGTCAGAGCGGTTGGCGAGGAGCAAAGGTCAGAGGAGCCAAAGCGCAGGGTGGATACTTCAGTGTCTTGGGAGGCGTTGATTTGTGTCGGATCGTCCAAGAAGAGAGCGAGGAAGG	CACGGCGTCTGGAATGCAGGATGAGGTCAGAGCGGTTGGCGAGGAGCAAAGGTCAGAGGAGCCAAAGCGCAGGGTGGATGCTGCAGTGGCTTGGGAGGCGTTGATTTGTGTCGGAGCGGCCAAGAAGAGAGCGAGGAAGG	65	Base change	VKSATLSSTESTASGMQDEVRAVGEEQRSEEPKRRVDAAVAWEALICVGAAKKRARKASSSDDEGGPRTLGGDGHRAEEASKDKE	VKSATLSSTESTASGMQDEVRAVGEEQRSEEPKRRVDTSVSWEALICVGSSKKRARKASSSDDEGGPRTLGGDGHRAEEASKDKE
CACGGCGTCTGGAATGCAGGATGAGGTCAGAGCGGTTGGCGAGGAGCAAAGGTCAGAGGAGCCAAAGCGCAGGGTGGATACTTCAGTGTCTTGGGAGGCGTTGATTTGTGTCGGATCGTCCAAGAAGAGAGCGAGGAAGG	CACGGCGTCTGGAATGCAGGATGAGGTCAGAGCGGTTGGCGAGGAGCAAAGGTCAGAGGAGCCAAAGCGCAGGGTGGATGCTGCAGTGGCTTGGGAGGCGTTGATTTGTGTCGGAGCGGCCAAGAAGAGAGCGAGGAAGG	62	Base change	VKSATLSSTESTASGMQDEVRAVGEEQRSEEPKRRVDAAVAWEALICVGAAKKRARKASSSDDEGGPRTLGGDGHRAEEASKDKE	VKSATLSSTESTASGMQDEVRAVGEEQRSEEPKRRVDTSVSWEALICVGSSKKRARKASSSDDEGGPRTLGGDGHRAEEASKDKE
CACGGCGTCTGGAATGCAGGATGAGGTCAGAGCGGTTGGCGAGGAGCAAAGGTCAGAGGAGCCAAAGCGCAGGGTGGATACTTCAGTGTCTTGGGAGGCGTTGATTTGTGTCGGATCGTCCAAGAAGAGAGCGAGGAAGG	CACGGCGTCTGGAATGCAGGATGAGGTCAGAGCGGTTGGCGAGGAGCAAAGGTCAGAGGAGCCAAAGCGCAGGGTGGATGCTGCAGTGGCTTGGGAGGCGTTGATTTGTGTCGGAGCGGCCAAGAAGAGAGCGAGGAAGG	60	Base change	VKSATLSSTESTASGMQDEVRAVGEEQRSEEPKRRVDAAVAWEALICVGAAKKRARKASSSDDEGGPRTLGGDGHRAEEASKDKE	VKSATLSSTESTASGMQDEVRAVGEEQRSEEPKRRVDTSVSWEALICVGSSKKRARKASSSDDEGGPRTLGGDGHRAEEASKDKE
CACGGCGTCTGGAATGCAGGATGAGGTCAGAGCGGTTGGCGAGGAGCAAAGGTCAGAGGAGCCAAAGCGCAGGGTGGATACTTCAGTGTCTTGGGAGGCGTTGATTTGTGTCGGATCGTCCAAGAAGAGAGCGAGGAAGG	CACGGCGTCTGGAATGCAGGATGAGGTCAGAGCGGTTGGCGAGGAGCAAAGGTCAGAGGAGCCAAAGCGCAGGGTGGATGCTGCAGTGGCTTGGGAGGCGTTGATTTGTGTCGGAGCGGCCAAGAAGAGAGCGAGGAAGG	55	Base change	VKSATLSSTESTASGMQDEVRAVGEEQRSEEPKRRVDAAVAWEALICVGAAKKRARKASSSDDEGGPRTLGGDGHRAEEASKDKE	VKSATLSSTESTASGMQDEVRAVGEEQRSEEPKRRVDTSVSWEALICVGSSKKRARKASSSDDEGGPRTLGGDGHRAEEASKDKE
CACGGCGTCTGGAATGCAGGATGAGGTCAGAGCGGTTGGCGAGGAGCAAAGGTCAGAGGAGCCAAAGCGCAGGGTGGATACTTCAGTGTCTTGGGAGGCGTTGATTTGTGTCGGATCGTCCAAGAAGAGAGCGAGGAAGG	CACGGCGTCTGGAATGCAGGATGAGGTCAGAGCGGTTGGCGAGGAGCAAAGGTCAGAGGAGCCAAAGCGCAGGGTGGATGCTGCAGTGGCTTGGGAGGCGTTGATTTGTGTCGGAGCGGCCAAGAAGAGAGCGAGGAAGG	55	Base change	VKSATLSSTESTASGMQDEVRAVGEEQRSEEPKRRVDAAVAWEALICVGAAKKRARKASSSDDEGGPRTLGGDGHRAEEASKDKE	VKSATLSSTESTASGMQDEVRAVGEEQRSEEPKRRVDTSVSWEALICVGSSKKRARKASSSDDEGGPRTLGGDGHRAEEASKDKE
CACGGCGTCTGGAATGCAGGATGAGGTCAGAGCGGTTGGCGAGGAGCAAAGGTCAGAGGAGCCAAAGCGCAGGGTGGATACTTCAGTGTCTTGGGAGGCGTTGATTTGTGTCGGATCGTCCAAGAAGAGAGCGAGGAAGG	CACGGCGTCTGGAATGCAGGATGAGGTCAGAGCGGTTGGCGAGGAGCAAAGGTCAGAGGAGCCAAAGCGCAGGGTGGATGCTGCAGTGGCTTGGGAGGCGTTGATTTGTGTCGGAGCGGCCAAGAAGAGAGCGAGGAAGG	52	Base change	VKSATLSSTESTASGMQDEVRAVGEEQRSEEPKRRVDAAVAWEALICVGAAKKRARKASSSDDEGGPRTLGGDGHRAEEASKDKE	VKSATLSSTESTASGMQDEVRAVGEEQRSEEPKRRVDTSVSWEALICVGSSKKRARKASSSDDEGGPRTLGGDGHRAEEASKDKE
CACGGCGTCTGGAATGCAGGATGAGGTCAGAGCGGTTGGCGAGGAGCAAAGGTCAGAGGAGCCAAAGCGCAGGGTGGATACTTCAGTGTCTTGGGAGGCGTTGATTTGTGTCGGATCGTCCAAGAAGAGAGCGAGGAAGG	CACGGCGTCTGGAATGCAGGATGAGGTCAGAGCGGTTGGCGAGGAGCAAAGGTCAGAGGAGCCAAAGCGCAGGGTGGATGCTGCAGTGGCTTGGGAGGCGTTGATTTGTGTCGGAGCGGCCAAGAAGAGAGCGAGGAAGG	51	Base change	VKSATLSSTESTASGMQDEVRAVGEEQRSEEPKRRVDAAVAWEALICVGAAKKRARKASSSDDEGGPRTLGGDGHRAEEASKDKE	VKSATLSSTESTASGMQDEVRAVGEEQRSEEPKRRVDTSVSWEALICVGSSKKRARKASSSDDEGGPRTLGGDGHRAEEASKDKE
CACGGCGTCTGGAATGCAGGATGAGGTCAGAGCGGTTGGCGAGGAGCAAAGGTCAGAGGAGCCAAAGCGCAGGGTGGATACTTCAGTGTCTTGGGAGGCGTTGATTTGTGTCGGATCGTCCAAGAAGAGAGCGAGGAAGG	CACGGCGTCTGGAATGCAGGATGAGGTCAGAGCGGTTGGCGAGGAGCAAAGGTCAGAGGAGCCAAAGCGCAGGGTGGATGCTGCAGTGGCTTGGGAGGCGTTGATTTGTGTCGGAGCGGCCAAGAAGAGAGCGAGGAAGG	50	Base change	VKSATLSSTESTASGMQDEVRAVGEEQRSEEPKRRVDAAVAWEALICVGAAKKRARKASSSDDEGGPRTLGGDGHRAEEASKDKE	VKSATLSSTESTASGMQDEVRAVGEEQRSEEPKRRVDTSVSWEALICVGSSKKRARKASSSDDEGGPRTLGGDGHRAEEASKDKE
CACGGCGTCTGGAATGCAGGATGAGGTCAGAGCGGTTGGCGAGGAGCAAAGGTCAGAGGAGCCAAAGCGCAGGGTGGATACTTCAGTGTCTTGGGAGGCGTTGATTTGTGTCGGATCGTCCAAGAAGAGAGCGAGGAAGG	CACGGCGTCTGGAATGCAGGATGAGGTCAGAGCGGTTGGCGAGGAGCAAAGGTCAGAGGAGCCAAAGCGCAGGGTGGATGCTGCAGTGGCTTGGGAGGCGTTGATTTGTGTCGGAGCGGCCAAGAAGAGAGCGAGGAAGG	50	Base change	VKSATLSSTESTASGMQDEVRAVGEEQRSEEPKRRVDAAVAWEALICVGAAKKRARKASSSDDEGGPRTLGGDGHRAEEASKDKE	VKSATLSSTESTASGMQDEVRAVGEEQRSEEPKRRVDTSVSWEALICVGSSKKRARKASSSDDEGGPRTLGGDGHRAEEASKDKE
CACGGCGTCTGGAATGCAGGATGAGGTCAGAGCGGTTGGCGAGGAGCAAAGGTCAGAGGAGCCAAAGCGCAGGGTGGATACTTCAGTGTCTTGGGAGGCGTTGATTTGTGTCGGATCGTCCAAGAAGAGAGCGAGGAAGG	CACGGCGTCTGGAATGCAGGATGAGGTCAGAGCGGTTGGCGAGGAGCAAAGGTCAGAGGAGCCAAAGCGCAGGGTGGATGCTGCAGTGGCTTGGGAGGCGTTGATTTGTGTCGGAGCGGCCAAGAAGAGAGCGAGGAAGG	48	Base change	VKSATLSSTESTASGMQDEVRAVGEEQRSEEPKRRVDAAVAWEALICVGAAKKRARKASSSDDEGGPRTLGGDGHRAEEASKDKE	VKSATLSSTESTASGMQDEVRAVGEEQRSEEPKRRVDTSVSWEALICVGSSKKRARKASSSDDEGGPRTLGGDGHRAEEASKDKE
CACGGCGTCTGGAATGCAGGATGAGGTCAGAGCGGTTGGCGAGGAGCAAAGGTCAGAGGAGCCAAAGCGCAGGGTGGATACTTCAGTGTCTTGGGAGGCGTTGATTTGTGTCGGATCGTCCAAGAAGAGAGCGAGGAAGG	CACGGCGTCTGGAATGCAGGATGAGGTCAGAGCGGTTGGCGAGGAGCAAAGGTCAGAGGAGCCAAAGCGCAGGGTGGATGCTGCAGTGGCTTGGGAGGCGTTGATTTGTGTCGGAGCGGCCAAGAAGAGAGCGAGGAAGG	48	Base change	VKSATLSSTESTASGMQDEVRAVGEEQRSEEPKRRVDAAVAWEALICVGAAKKRARKASSSDDEGGPRTLGGDGHRAEEASKDKE	VKSATLSSTESTASGMQDEVRAVGEEQRSEEPKRRVDTSVSWEALICVGSSKKRARKASSSDDEGGPRTLGGDGHRAEEASKDKE
CACGGCGTCTGGAATGCAGGATGAGGTCAGAGCGGTTGGCGAGGAGCAAAGGTCAGAGGAGCCAAAGCGCAGGGTGGATACTTCAGTGTCTTGGGAGGCGTTGATTTGTGTCGGATCGTCCAAGAAGAGAGCGAGGAAGG	CACGGCGTCTGGAATGCAGGATGAGGTCAGAGCGGTTGGCGAGGAGCAAAGGTCAGAGGAGCCAAAGCGCAGGGTGGATGCTGCAGTGGCTTGGGAGGCGTTGATTTGTGTCGGAGCGGCCAAGAAGAGAGCGAGGAAGG	47	Base change	VKSATLSSTESTASGMQDEVRAVGEEQRSEEPKRRVDAAVAWEALICVGAAKKRARKASSSDDEGGPRTLGGDGHRAEEASKDKE	VKSATLSSTESTASGMQDEVRAVGEEQRSEEPKRRVDTSVSWEALICVGSSKKRARKASSSDDEGGPRTLGGDGHRAEEASKDKE
CACGGCGTCTGGAATGCAGGATGAGGTCAGAGCGGTTGGCGAGGAGCAAAGGTCAGAGGAGCCAAAGCGCAGGGTGGATACTTCAGTGTCTTGGGAGGCGTTGATTTGTGTCGGATCGTCCAAGAAGAGAGCGAGGAAGG	CACGGCGTCTGGAATGCAGGATGAGGTCAGAGCGGTTGGCGAGGAGCAAAGGTCAGAGGAGCCAAAGCGCAGGGTGGATGCTGCAGTGGCTTGGGAGGCGTTGATTTGTGTCGGAGCGGCCAAGAAGAGAGCGAGGAAGG	46	Base change	VKSATLSSTESTASGMQDEVRAVGEEQRSEEPKRRVDAAVAWEALICVGAAKKRARKASSSDDEGGPRTLGGDGHRAEEASKDKE	VKSATLSSTESTASGMQDEVRAVGEEQRSEEPKRRVDTSVSWEALICVGSSKKRARKASSSDDEGGPRTLGGDGHRAEEASKDKE
CACGGCGTCTGGAATGCAGGATGAGGTCAGAGCGGTTGGCGAGGAGCAAAGGTCAGAGGAGCCAAAGCGCAGGGTGGATACTTCAGTGTCTTGGGAGGCGTTGATTTGTGTCGGATCGTCCAAGAAGAGAGCGAGGAAGG	CACGGCGTCTGGAATGCAGGATGAGGTCAGAGCGGTTGGCGAGGAGCAAAGGTCAGAGGAGCCAAAGCGCAGGGTGGATGCTGCAGTGGCTTGGGAGGCGTTGATTTGTGTCGGAGCGGCCAAGAAGAGAGCGAGGAAGG	46	Base change	VKSATLSSTESTASGMQDEVRAVGEEQRSEEPKRRVDAAVAWEALICVGAAKKRARKASSSDDEGGPRTLGGDGHRAEEASKDKE	VKSATLSSTESTASGMQDEVRAVGEEQRSEEPKRRVDTSVSWEALICVGSSKKRARKASSSDDEGGPRTLGGDGHRAEEASKDKE
CACGGCGTCTGGAATGCAGGATGAGGTCAGAGCGGTTGGCGAGGAGCAAAGGTCAGAGGAGCCAAAGCGCAGGGTGGATACTTCAGTGTCTTGGGAGGCGTTGATTTGTGTCGGATCGTCCAAGAAGAGAGCGAGGAAGG	CACGGCGTCTGGAATGCAGGATGAGGTCAGAGCGGTTGGCGAGGAGCAAAGGTCAGAGGAGCCAAAGCGCAGGGTGGATGCTGCAGTGGCTTGGGAGGCGTTGATTTGTGTCGGAGCGGCCAAGAAGAGAGCGAGGAAGG	45	Base change	VKSATLSSTESTASGMQDEVRAVGEEQRSEEPKRRVDAAVAWEALICVGAAKKRARKASSSDDEGGPRTLGGDGHRAEEASKDKE	VKSATLSSTESTASGMQDEVRAVGEEQRSEEPKRRVDTSVSWEALICVGSSKKRARKASSSDDEGGPRTLGGDGHRAEEASKDKE
CACGGCGTCTGGAATGCAGGATGAGGTCAGAGCGGTTGGCGAGGAGCAAAGGTCAGAGGAGCCAAAGCGCAGGGTGGATACTTCAGTGTCTTGGGAGGCGTTGATTTGTGTCGGATCGTCCAAGAAGAGAGCGAGGAAGG	CACGGCGTCTGGAATGCAGGATGAGGTCAGAGCGGTTGGCGAGGAGCAAAGGTCAGAGGAGCCAAAGCGCAGGGTGGATGCTGCAGTGGCTTGGGAGGCGTTGATTTGTGTCGGAGCGGCCAAGAAGAGAGCGAGGAAGG	45	Base change	VKSATLSSTESTASGMQDEVRAVGEEQRSEEPKRRVDAAVAWEALICVGAAKKRARKASSSDDEGGPRTLGGDGHRAEEASKDKE	VKSATLSSTESTASGMQDEVRAVGEEQRSEEPKRRVDTSVSWEALICVGSSKKRARKASSSDDEGGPRTLGGDGHRAEEASKDKE
CACGGCGTCTGGAATGCAGGATGAGGTCAGAGCGGTTGGCGAGGAGCAAAGGTCAGAGGAGCCAAAGCGCAGGGTGGATACTTCAGTGTCTTGGGAGGCGTTGATTTGTGTCGGATCGTCCAAGAAGAGAGCGAGGAAGG	CACGGCGTCTGGAATGCAGGATGAGGTCAGAGCGGTTGGCGAGGAGCAAAGGTCAGAGGAGCCAAAGCGCAGGGTGGATGCTGCAGTGGCTTGGGAGGCGTTGATTTGTGTCGGAGCGGCCAAGAAGAGAGCGAGGAAGG	44	Base change	VKSATLSSTESTASGMQDEVRAVGEEQRSEEPKRRVDAAVAWEALICVGAAKKRARKASSSDDEGGPRTLGGDGHRAEEASKDKE	VKSATLSSTESTASGMQDEVRAVGEEQRSEEPKRRVDTSVSWEALICVGSSKKRARKASSSDDEGGPRTLGGDGHRAEEASKDKE
CACGGCGTCTGGAATGCAGGATGAGGTCAGAGCGGTTGGCGAGGAGCAAAGGTCAGAGGAGCCAAAGCGCAGGGTGGATACTTCAGTGTCTTGGGAGGCGTTGATTTGTGTCGGATCGTCCAAGAAGAGAGCGAGGAAGG	CACGGCGTCTGGAATGCAGGATGAGGTCAGAGCGGTTGGCGAGGAGCAAAGGTCAGAGGAGCCAAAGCGCAGGGTGGATGCTGCAGTGGCTTGGGAGGCGTTGATTTGTGTCGGAGCGGCCAAGAAGAGAGCGAGGAAGG	44	Base change	VKSATLSSTESTASGMQDEVRAVGEEQRSEEPKRRVDAAVAWEALICVGAAKKRARKASSSDDEGGPRTLGGDGHRAEEASKDKE	VKSATLSSTESTASGMQDEVRAVGEEQRSEEPKRRVDTSVSWEALICVGSSKKRARKASSSDDEGGPRTLGGDGHRAEEASKDKE
CACGGCGTCTGGAATGCAGGATGAGGTCAGAGCGGTTGGCGAGGAGCAAAGGTCAGAGGAGCCAAAGCGCAGGGTGGATACTTCAGTGTCTTGGGAGGCGTTGATTTGTGTCGGATCGTCCAAGAAGAGAGCGAGGAAGG	CACGGCGTCTGGAATGCAGGATGAGGTCAGAGCGGTTGGCGAGGAGCAAAGGTCAGAGGAGCCAAAGCGCAGGGTGGATGCTGCAGTGGCTTGGGAGGCGTTGATTTGTGTCGGAGCGGCCAAGAAGAGAGCGAGGAAGG	44	Base change	VKSATLSSTESTASGMQDEVRAVGEEQRSEEPKRRVDAAVAWEALICVGAAKKRARKASSSDDEGGPRTLGGDGHRAEEASKDKE	VKSATLSSTESTASGMQDEVRAVGEEQRSEEPKRRVDTSVSWEALICVGSSKKRARKASSSDDEGGPRTLGGDGHRAEEASKDKE
CACGGCGTCTGGAATGCAGGATGAGGTCAGAGCGGTTGGCGAGGAGCAAAGGTCAGAGGAGCCAAAGCGCAGGGTGGATACTTCAGTGTCTTGGGAGGCGTTGATTTGTGTCGGATCGTCCAAGAAGAGAGCGAGGAAGG	CACGGCGTCTGGAATGCAGGATGAGGTCAGAGCGGTTGGCGAGGAGCAAAGGTCAGAGGAGCCAAAGCGCAGGGTGGATGCTGCAGTGGCTTGGGAGGCGTTGATTTGTGTCGGAGCGGCCAAGAAGAGAGCGAGGAAGG	43	Base change	VKSATLSSTESTASGMQDEVRAVGEEQRSEEPKRRVDAAVAWEALICVGAAKKRARKASSSDDEGGPRTLGGDGHRAEEASKDKE	VKSATLSSTESTASGMQDEVRAVGEEQRSEEPKRRVDTSVSWEALICVGSSKKRARKASSSDDEGGPRTLGGDGHRAEEASKDKE
CACGGCGTCTGGAATGCAGGATGAGGTCAGAGCGGTTGGCGAGGAGCAAAGGTCAGAGGAGCCAAAGCGCAGGGTGGATACTTCAGTGTCTTGGGAGGCGTTGATTTGTGTCGGATCGTCCAAGAAGAGAGCGAGGAAGG	CACGGCGTCTGGAATGCAGGATGAGGTCAGAGCGGTTGGCGAGGAGCAAAGGTCAGAGGAGCCAAAGCGCAGGGTGGATGCTGCAGTGGCTTGGGAGGCGTTGATTTGTGTCGGAGCGGCCAAGAAGAGAGCGAGGAAGG	42	Base change	VKSATLSSTESTASGMQDEVRAVGEEQRSEEPKRRVDAAVAWEALICVGAAKKRARKASSSDDEGGPRTLGGDGHRAEEASKDKE	VKSATLSSTESTASGMQDEVRAVGEEQRSEEPKRRVDTSVSWEALICVGSSKKRARKASSSDDEGGPRTLGGDGHRAEEASKDKE
CACGGCGTCTGGAATGCAGGATGAGGTCAGAGCGGTTGGCGAGGAGCAAAGGTCAGAGGAGCCAAAGCGCAGGGTGGATACTTCAGTGTCTTGGGAGGCGTTGATTTGTGTCGGATCGTCCAAGAAGAGAGCGAGGAAGG	CACGGCGTCTGGAATGCAGGATGAGGTCAGAGCGGTTGGCGAGGAGCAAAGGTCAGAGGAGCCAAAGCGCAGGGTGGATGCTGCAGTGGCTTGGGAGGCGTTGATTTGTGTCGGAGCGGCCAAGAAGAGAGCGAGGAAGG	40	Base change	VKSATLSSTESTASGMQDEVRAVGEEQRSEEPKRRVDAAVAWEALICVGAAKKRARKASSSDDEGGPRTLGGDGHRAEEASKDKE	VKSATLSSTESTASGMQDEVRAVGEEQRSEEPKRRVDTSVSWEALICVGSSKKRARKASSSDDEGGPRTLGGDGHRAEEASKDKE
CACGGCGTCTGGAATGCAGGATGAGGTCAGAGCGGTTGGCGAGGAGCAAAGGTCAGAGGAGCCAAAGCGCAGGGTGGATACTTCAGTGTCTTGGGAGGCGTTGATTTGTGTCGGATCGTCCAAGAAGAGAGCGAGGAAGG	CACGGCGTCTGGAATGCAGGATGAGGTCAGAGCGGTTGGCGAGGAGCAAAGGTCAGAGGAGCCAAAGCGCAGGGTGGATGCTGCAGTGGCTTGGGAGGCGTTGATTTGTGTCGGAGCGGCCAAGAAGAGAGCGAGGAAGG	39	Base change	VKSATLSSTESTASGMQDEVRAVGEEQRSEEPKRRVDAAVAWEALICVGAAKKRARKASSSDDEGGPRTLGGDGHRAEEASKDKE	VKSATLSSTESTASGMQDEVRAVGEEQRSEEPKRRVDTSVSWEALICVGSSKKRARKASSSDDEGGPRTLGGDGHRAEEASKDKE
CACGGCGTCTGGAATGCAGGATGAGGTCAGAGCGGTTGGCGAGGAGCAAAGGTCAGAGGAGCCAAAGCGCAGGGTGGATACTTCAGTGTCTTGGGAGGCGTTGATTTGTGTCGGATCGTCCAAGAAGAGAGCGAGGAAGG	CACGGCGTCTGGAATGCAGGATGAGGTCAGAGCGGTTGGCGAGGAGCAAAGGTCAGAGGAGCCAAAGCGCAGGGTGGATGCTGCAGTGGCTTGGGAGGCGTTGATTTGTGTCGGAGCGGCCAAGAAGAGAGCGAGGAAGG	38	Base change	VKSATLSSTESTASGMQDEVRAVGEEQRSEEPKRRVDAAVAWEALICVGAAKKRARKASSSDDEGGPRTLGGDGHRAEEASKDKE	VKSATLSSTESTASGMQDEVRAVGEEQRSEEPKRRVDTSVSWEALICVGSSKKRARKASSSDDEGGPRTLGGDGHRAEEASKDKE
CACGGCGTCTGGAATGCAGGATGAGGTCAGAGCGGTTGGCGAGGAGCAAAGGTCAGAGGAGCCAAAGCGCAGGGTGGATACTTCAGTGTCTTGGGAGGCGTTGATTTGTGTCGGATCGTCCAAGAAGAGAGCGAGGAAGG	CACGGCGTCTGGAATGCAGGATGAGGTCAGAGCGGTTGGCGAGGAGCAAAGGTCAGAGGAGCCAAAGCGCAGGGTGGATGCTGCAGTGGCTTGGGAGGCGTTGATTTGTGTCGGAGCGGCCAAGAAGAGAGCGAGGAAGG	38	Base change	VKSATLSSTESTASGMQDEVRAVGEEQRSEEPKRRVDAAVAWEALICVGAAKKRARKASSSDDEGGPRTLGGDGHRAEEASKDKE	VKSATLSSTESTASGMQDEVRAVGEEQRSEEPKRRVDTSVSWEALICVGSSKKRARKASSSDDEGGPRTLGGDGHRAEEASKDKE
CACGGCGTCTGGAATGCAGGATGAGGTCAGAGCGGTTGGCGAGGAGCAAAGGTCAGAGGAGCCAAAGCGCAGGGTGGATACTTCAGTGTCTTGGGAGGCGTTGATTTGTGTCGGATCGTCCAAGAAGAGAGCGAGGAAGG	CACGGCGTCTGGAATGCAGGATGAGGTCAGAGCGGTTGGCGAGGAGCAAAGGTCAGAGGAGCCAAAGCGCAGGGTGGATGCTGCAGTGGCTTGGGAGGCGTTGATTTGTGTCGGAGCGGCCAAGAAGAGAGCGAGGAAGG	37	Base change	VKSATLSSTESTASGMQDEVRAVGEEQRSEEPKRRVDAAVAWEALICVGAAKKRARKASSSDDEGGPRTLGGDGHRAEEASKDKE	VKSATLSSTESTASGMQDEVRAVGEEQRSEEPKRRVDTSVSWEALICVGSSKKRARKASSSDDEGGPRTLGGDGHRAEEASKDKE
CACGGCGTCTGGAATGCAGGATGAGGTCAGAGCGGTTGGCGAGGAGCAAAGGTCAGAGGAGCCAAAGCGCAGGGTGGATACTTCAGTGTCTTGGGAGGCGTTGATTTGTGTCGGATCGTCCAAGAAGAGAGCGAGGAAGG	CACGGCGTCTGGAATGCAGGATGAGGTCAGAGCGGTTGGCGAGGAGCAAAGGTCAGAGGAGCCAAAGCGCAGGGTGGATGCTGCAGTGGCTTGGGAGGCGTTGATTTGTGTCGGAGCGGCCAAGAAGAGAGCGAGGAAGG	37	Base change	VKSATLSSTESTASGMQDEVRAVGEEQRSEEPKRRVDAAVAWEALICVGAAKKRARKASSSDDEGGPRTLGGDGHRAEEASKDKE	VKSATLSSTESTASGMQDEVRAVGEEQRSEEPKRRVDTSVSWEALICVGSSKKRARKASSSDDEGGPRTLGGDGHRAEEASKDKE
CACGGCGTCTGGAATGCAGGATGAGGTCAGAGCGGTTGGCGAGGAGCAAAGGTCAGAGGAGCCAAAGCGCAGGGTGGATACTTCAGTGTCTTGGGAGGCGTTGATTTGTGTCGGATCGTCCAAGAAGAGAGCGAGGAAGG	CACGGCGTCTGGAATGCAGGATGAGGTCAGAGCGGTTGGCGAGGAGCAAAGGTCAGAGGAGCCAAAGCGCAGGGTGGATGCTGCAGTGGCTTGGGAGGCGTTGATTTGTGTCGGAGCGGCCAAGAAGAGAGCGAGGAAGG	36	Base change	VKSATLSSTESTASGMQDEVRAVGEEQRSEEPKRRVDAAVAWEALICVGAAKKRARKASSSDDEGGPRTLGGDGHRAEEASKDKE	VKSATLSSTESTASGMQDEVRAVGEEQRSEEPKRRVDTSVSWEALICVGSSKKRARKASSSDDEGGPRTLGGDGHRAEEASKDKE
CACGGCGTCTGGAATGCAGGATGAGGTCAGAGCGGTTGGCGAGGAGCAAAGGTCAGAGGAGCCAAAGCGCAGGGTGGATACTTCAGTGTCTTGGGAGGCGTTGATTTGTGTCGGATCGTCCAAGAAGAGAGCGAGGAAGG	CACGGCGTCTGGAATGCAGGATGAGGTCAGAGCGGTTGGCGAGGAGCAAAGGTCAGAGGAGCCAAAGCGCAGGGTGGATGCTGCAGTGGCTTGGGAGGCGTTGATTTGTGTCGGAGCGGCCAAGAAGAGAGCGAGGAAGG	36	Base change	VKSATLSSTESTASGMQDEVRAVGEEQRSEEPKRRVDAAVAWEALICVGAAKKRARKASSSDDEGGPRTLGGDGHRAEEASKDKE	VKSATLSSTESTASGMQDEVRAVGEEQRSEEPKRRVDTSVSWEALICVGSSKKRARKASSSDDEGGPRTLGGDGHRAEEASKDKE
CACGGCGTCTGGAATGCAGGATGAGGTCAGAGCGGTTGGCGAGGAGCAAAGGTCAGAGGAGCCAAAGCGCAGGGTGGATACTTCAGTGTCTTGGGAGGCGTTGATTTGTGTCGGATCGTCCAAGAAGAGAGCGAGGAAGG	CACGGCGTCTGGAATGCAGGATGAGGTCAGAGCGGTTGGCGAGGAGCAAAGGTCAGAGGAGCCAAAGCGCAGGGTGGATGCTGCAGTGGCTTGGGAGGCGTTGATTTGTGTCGGAGCGGCCAAGAAGAGAGCGAGGAAGG	36	Base change	VKSATLSSTESTASGMQDEVRAVGEEQRSEEPKRRVDAAVAWEALICVGAAKKRARKASSSDDEGGPRTLGGDGHRAEEASKDKE	VKSATLSSTESTASGMQDEVRAVGEEQRSEEPKRRVDTSVSWEALICVGSSKKRARKASSSDDEGGPRTLGGDGHRAEEASKDKE
CACGGCGTCTGGAATGCAGGATGAGGTCAGAGCGGTTGGCGAGGAGCAAAGGTCAGAGGAGCCAAAGCGCAGGGTGGATACTTCAGTGTCTTGGGAGGCGTTGATTTGTGTCGGATCGTCCAAGAAGAGAGCGAGGAAGG	CACGGCGTCTGGAATGCAGGATGAGGTCAGAGCGGTTGGCGAGGAGCAAAGGTCAGAGGAGCCAAAGCGCAGGGTGGATGCTGCAGTGGCTTGGGAGGCGTTGATTTGTGTCGGAGCGGCCAAGAAGAGAGCGAGGAAGG	36	Base change	VKSATLSSTESTASGMQDEVRAVGEEQRSEEPKRRVDAAVAWEALICVGAAKKRARKASSSDDEGGPRTLGGDGHRAEEASKDKE	VKSATLSSTESTASGMQDEVRAVGEEQRSEEPKRRVDTSVSWEALICVGSSKKRARKASSSDDEGGPRTLGGDGHRAEEASKDKE
CACGGCGTCTGGAATGCAGGATGAGGTCAGAGCGGTTGGCGAGGAGCAAAGGTCAGAGGAGCCAAAGCGCAGGGTGGATACTTCAGTGTCTTGGGAGGCGTTGATTTGTGTCGGATCGTCCAAGAAGAGAGCGAGGAAGG	CACGGCGTCTGGAATGCAGGATGAGGTCAGAGCGGTTGGCGAGGAGCAAAGGTCAGAGGAGCCAAAGCGCAGGGTGGATGCTGCAGTGGCTTGGGAGGCGTTGATTTGTGTCGGAGCGGCCAAGAAGAGAGCGAGGAAGG	36	Base change	VKSATLSSTESTASGMQDEVRAVGEEQRSEEPKRRVDAAVAWEALICVGAAKKRARKASSSDDEGGPRTLGGDGHRAEEASKDKE	VKSATLSSTESTASGMQDEVRAVGEEQRSEEPKRRVDTSVSWEALICVGSSKKRARKASSSDDEGGPRTLGGDGHRAEEASKDKE
CACGGCGTCTGGAATGCAGGATGAGGTCAGAGCGGTTGGCGAGGAGCAAAGGTCAGAGGAGCCAAAGCGCAGGGTGGATACTTCAGTGTCTTGGGAGGCGTTGATTTGTGTCGGATCGTCCAAGAAGAGAGCGAGGAAGG	CACGGCGTCTGGAATGCAGGATGAGGTCAGAGCGGTTGGCGAGGAGCAAAGGTCAGAGGAGCCAAAGCGCAGGGTGGATGCTGCAGTGGCTTGGGAGGCGTTGATTTGTGTCGGAGCGGCCAAGAAGAGAGCGAGGAAGG	36	Base change	VKSATLSSTESTASGMQDEVRAVGEEQRSEEPKRRVDAAVAWEALICVGAAKKRARKASSSDDEGGPRTLGGDGHRAEEASKDKE	VKSATLSSTESTASGMQDEVRAVGEEQRSEEPKRRVDTSVSWEALICVGSSKKRARKASSSDDEGGPRTLGGDGHRAEEASKDKE
CACGGCGTCTGGAATGCAGGATGAGGTCAGAGCGGTTGGCGAGGAGCAAAGGTCAGAGGAGCCAAAGCGCAGGGTGGATACTTCAGTGTCTTGGGAGGCGTTGATTTGTGTCGGATCGTCCAAGAAGAGAGCGAGGAAGG	CACGGCGTCTGGAATGCAGGATGAGGTCAGAGCGGTTGGCGAGGAGCAAAGGTCAGAGGAGCCAAAGCGCAGGGTGGATGCTGCAGTGGCTTGGGAGGCGTTGATTTGTGTCGGAGCGGCCAAGAAGAGAGCGAGGAAGG	35	Base change	VKSATLSSTESTASGMQDEVRAVGEEQRSEEPKRRVDAAVAWEALICVGAAKKRARKASSSDDEGGPRTLGGDGHRAEEASKDKE	VKSATLSSTESTASGMQDEVRAVGEEQRSEEPKRRVDTSVSWEALICVGSSKKRARKASSSDDEGGPRTLGGDGHRAEEASKDKE
CACGGCGTCTGGAATGCAGGATGAGGTCAGAGCGGTTGGCGAGGAGCAAAGGTCAGAGGAGCCAAAGCGCAGGGTGGATACTTCAGTGTCTTGGGAGGCGTTGATTTGTGTCGGATCGTCCAAGAAGAGAGCGAGGAAGG	CACGGCGTCTGGAATGCAGGATGAGGTCAGAGCGGTTGGCGAGGAGCAAAGGTCAGAGGAGCCAAAGCGCAGGGTGGATGCTGCAGTGGCTTGGGAGGCGTTGATTTGTGTCGGAGCGGCCAAGAAGAGAGCGAGGAAGG	34	Base change	VKSATLSSTESTASGMQDEVRAVGEEQRSEEPKRRVDAAVAWEALICVGAAKKRARKASSSDDEGGPRTLGGDGHRAEEASKDKE	VKSATLSSTESTASGMQDEVRAVGEEQRSEEPKRRVDTSVSWEALICVGSSKKRARKASSSDDEGGPRTLGGDGHRAEEASKDKE
CACGGCGTCTGGAATGCAGGATGAGGTCAGAGCGGTTGGCGAGGAGCAAAGGTCAGAGGAGCCAAAGCGCAGGGTGGATACTTCAGTGTCTTGGGAGGCGTTGATTTGTGTCGGATCGTCCAAGAAGAGAGCGAGGAAGG	CACGGCGTCTGGAATGCAGGATGAGGTCAGAGCGGTTGGCGAGGAGCAAAGGTCAGAGGAGCCAAAGCGCAGGGTGGATGCTGCAGTGGCTTGGGAGGCGTTGATTTGTGTCGGAGCGGCCAAGAAGAGAGCGAGGAAGG	34	Base change	VKSATLSSTESTASGMQDEVRAVGEEQRSEEPKRRVDAAVAWEALICVGAAKKRARKASSSDDEGGPRTLGGDGHRAEEASKDKE	VKSATLSSTESTASGMQDEVRAVGEEQRSEEPKRRVDTSVSWEALICVGSSKKRARKASSSDDEGGPRTLGGDGHRAEEASKDKE
CACGGCGTCTGGAATGCAGGATGAGGTCAGAGCGGTTGGCGAGGAGCAAAGGTCAGAGGAGCCAAAGCGCAGGGTGGATACTTCAGTGTCTTGGGAGGCGTTGATTTGTGTCGGATCGTCCAAGAAGAGAGCGAGGAAGG	CACGGCGTCTGGAATGCAGGATGAGGTCAGAGCGGTTGGCGAGGAGCAAAGGTCAGAGGAGCCAAAGCGCAGGGTGGATGCTGCAGTGGCTTGGGAGGCGTTGATTTGTGTCGGAGCGGCCAAGAAGAGAGCGAGGAAGG	33	Base change	VKSATLSSTESTASGMQDEVRAVGEEQRSEEPKRRVDAAVAWEALICVGAAKKRARKASSSDDEGGPRTLGGDGHRAEEASKDKE	VKSATLSSTESTASGMQDEVRAVGEEQRSEEPKRRVDTSVSWEALICVGSSKKRARKASSSDDEGGPRTLGGDGHRAEEASKDKE
CACGGCGTCTGGAATGCAGGATGAGGTCAGAGCGGTTGGCGAGGAGCAAAGGTCAGAGGAGCCAAAGCGCAGGGTGGATACTTCAGTGTCTTGGGAGGCGTTGATTTGTGTCGGATCGTCCAAGAAGAGAGCGAGGAAGG	CACGGCGTCTGGAATGCAGGATGAGGTCAGAGCGGTTGGCGAGGAGCAAAGGTCAGAGGAGCCAAAGCGCAGGGTGGATGCTGCAGTGGCTTGGGAGGCGTTGATTTGTGTCGGAGCGGCCAAGAAGAGAGCGAGGAAGG	33	Base change	VKSATLSSTESTASGMQDEVRAVGEEQRSEEPKRRVDAAVAWEALICVGAAKKRARKASSSDDEGGPRTLGGDGHRAEEASKDKE	VKSATLSSTESTASGMQDEVRAVGEEQRSEEPKRRVDTSVSWEALICVGSSKKRARKASSSDDEGGPRTLGGDGHRAEEASKDKE
CACGGCGTCTGGAATGCAGGATGAGGTCAGAGCGGTTGGCGAGGAGCAAAGGTCAGAGGAGCCAAAGCGCAGGGTGGATACTTCAGTGTCTTGGGAGGCGTTGATTTGTGTCGGATCGTCCAAGAAGAGAGCGAGGAAGG	CACGGCGTCTGGAATGCAGGATGAGGTCAGAGCGGTTGGCGAGGAGCAAAGGTCAGAGGAGCCAAAGCGCAGGGTGGATGCTGCAGTGGCTTGGGAGGCGTTGATTTGTGTCGGAGCGGCCAAGAAGAGAGCGAGGAAGG	33	Base change	VKSATLSSTESTASGMQDEVRAVGEEQRSEEPKRRVDAAVAWEALICVGAAKKRARKASSSDDEGGPRTLGGDGHRAEEASKDKE	VKSATLSSTESTASGMQDEVRAVGEEQRSEEPKRRVDTSVSWEALICVGSSKKRARKASSSDDEGGPRTLGGDGHRAEEASKDKE
CACGGCGTCTGGAATGCAGGATGAGGTCAGAGCGGTTGGCGAGGAGCAAAGGTCAGAGGAGCCAAAGCGCAGGGTGGATACTTCAGTGTCTTGGGAGGCGTTGATTTGTGTCGGATCGTCCAAGAAGAGAGCGAGGAAGG	CACGGCGTCTGGAATGCAGGATGAGGTCAGAGCGGTTGGCGAGGAGCAAAGGTCAGAGGAGCCAAAGCGCAGGGTGGATGCTGCAGTGGCTTGGGAGGCGTTGATTTGTGTCGGAGCGGCCAAGAAGAGAGCGAGGAAGG	32	Base change	VKSATLSSTESTASGMQDEVRAVGEEQRSEEPKRRVDAAVAWEALICVGAAKKRARKASSSDDEGGPRTLGGDGHRAEEASKDKE	VKSATLSSTESTASGMQDEVRAVGEEQRSEEPKRRVDTSVSWEALICVGSSKKRARKASSSDDEGGPRTLGGDGHRAEEASKDKE
CACGGCGTCTGGAATGCAGGATGAGGTCAGAGCGGTTGGCGAGGAGCAAAGGTCAGAGGAGCCAAAGCGCAGGGTGGATACTTCAGTGTCTTGGGAGGCGTTGATTTGTGTCGGATCGTCCAAGAAGAGAGCGAGGAAGG	CACGGCGTCTGGAATGCAGGATGAGGTCAGAGCGGTTGGCGAGGAGCAAAGGTCAGAGGAGCCAAAGCGCAGGGTGGATGCTGCAGTGGCTTGGGAGGCGTTGATTTGTGTCGGAGCGGCCAAGAAGAGAGCGAGGAAGG	31	Base change	VKSATLSSTESTASGMQDEVRAVGEEQRSEEPKRRVDAAVAWEALICVGAAKKRARKASSSDDEGGPRTLGGDGHRAEEASKDKE	VKSATLSSTESTASGMQDEVRAVGEEQRSEEPKRRVDTSVSWEALICVGSSKKRARKASSSDDEGGPRTLGGDGHRAEEASKDKE
CACGGCGTCTGGAATGCAGGATGAGGTCAGAGCGGTTGGCGAGGAGCAAAGGTCAGAGGAGCCAAAGCGCAGGGTGGATACTTCAGTGTCTTGGGAGGCGTTGATTTGTGTCGGATCGTCCAAGAAGAGAGCGAGGAAGG	CACGGCGTCTGGAATGCAGGATGAGGTCAGAGCGGTTGGCGAGGAGCAAAGGTCAGAGGAGCCAAAGCGCAGGGTGGATGCTGCAGTGGCTTGGGAGGCGTTGATTTGTGTCGGAGCGGCCAAGAAGAGAGCGAGGAAGG	31	Base change	VKSATLSSTESTASGMQDEVRAVGEEQRSEEPKRRVDAAVAWEALICVGAAKKRARKASSSDDEGGPRTLGGDGHRAEEASKDKE	VKSATLSSTESTASGMQDEVRAVGEEQRSEEPKRRVDTSVSWEALICVGSSKKRARKASSSDDEGGPRTLGGDGHRAEEASKDKE
CACGGCGTCTGGAATGCAGGATGAGGTCAGAGCGGTTGGCGAGGAGCAAAGGTCAGAGGAGCCAAAGCGCAGGGTGGATACTTCAGTGTCTTGGGAGGCGTTGATTTGTGTCGGATCGTCCAAGAAGAGAGCGAGGAAGG	CACGGCGTCTGGAATGCAGGATGAGGTCAGAGCGGTTGGCGAGGAGCAAAGGTCAGAGGAGCCAAAGCGCAGGGTGGATGCTGCAGTGGCTTGGGAGGCGTTGATTTGTGTCGGAGCGGCCAAGAAGAGAGCGAGGAAGG	31	Base change	VKSATLSSTESTASGMQDEVRAVGEEQRSEEPKRRVDAAVAWEALICVGAAKKRARKASSSDDEGGPRTLGGDGHRAEEASKDKE	VKSATLSSTESTASGMQDEVRAVGEEQRSEEPKRRVDTSVSWEALICVGSSKKRARKASSSDDEGGPRTLGGDGHRAEEASKDKE
CACGGCGTCTGGAATGCAGGATGAGGTCAGAGCGGTTGGCGAGGAGCAAAGGTCAGAGGAGCCAAAGCGCAGGGTGGATACTTCAGTGTCTTGGGAGGCGTTGATTTGTGTCGGATCGTCCAAGAAGAGAGCGAGGAAGG	CACGGCGTCTGGAATGCAGGATGAGGTCAGAGCGGTTGGCGAGGAGCAAAGGTCAGAGGAGCCAAAGCGCAGGGTGGATGCTGCAGTGGCTTGGGAGGCGTTGATTTGTGTCGGAGCGGCCAAGAAGAGAGCGAGGAAGG	30	Base change	VKSATLSSTESTASGMQDEVRAVGEEQRSEEPKRRVDAAVAWEALICVGAAKKRARKASSSDDEGGPRTLGGDGHRAEEASKDKE	VKSATLSSTESTASGMQDEVRAVGEEQRSEEPKRRVDTSVSWEALICVGSSKKRARKASSSDDEGGPRTLGGDGHRAEEASKDKE
CACGGCGTCTGGAATGCAGGATGAGGTCAGAGCGGTTGGCGAGGAGCAAAGGTCAGAGGAGCCAAAGCGCAGGGTGGATACTTCAGTGTCTTGGGAGGCGTTGATTTGTGTCGGATCGTCCAAGAAGAGAGCGAGGAAGG	CACGGCGTCTGGAATGCAGGATGAGGTCAGAGCGGTTGGCGAGGAGCAAAGGTCAGAGGAGCCAAAGCGCAGGGTGGATGCTGCAGTGGCTTGGGAGGCGTTGATTTGTGTCGGAGCGGCCAAGAAGAGAGCGAGGAAGG	30	Base change	VKSATLSSTESTASGMQDEVRAVGEEQRSEEPKRRVDAAVAWEALICVGAAKKRARKASSSDDEGGPRTLGGDGHRAEEASKDKE	VKSATLSSTESTASGMQDEVRAVGEEQRSEEPKRRVDTSVSWEALICVGSSKKRARKASSSDDEGGPRTLGGDGHRAEEASKDKE
CACGGCGTCTGGAATGCAGGATGAGGTCAGAGCGGTTGGCGAGGAGCAAAGGTCAGAGGAGCCAAAGCGCAGGGTGGATACTTCAGTGTCTTGGGAGGCGTTGATTTGTGTCGGATCGTCCAAGAAGAGAGCGAGGAAGG	CACGGCGTCTGGAATGCAGGATGAGGTCAGAGCGGTTGGCGAGGAGCAAAGGTCAGAGGAGCCAAAGCGCAGGGTGGATGCTGCAGTGGCTTGGGAGGCGTTGATTTGTGTCGGAGCGGCCAAGAAGAGAGCGAGGAAGG	30	Base change	VKSATLSSTESTASGMQDEVRAVGEEQRSEEPKRRVDAAVAWEALICVGAAKKRARKASSSDDEGGPRTLGGDGHRAEEASKDKE	VKSATLSSTESTASGMQDEVRAVGEEQRSEEPKRRVDTSVSWEALICVGSSKKRARKASSSDDEGGPRTLGGDGHRAEEASKDKE
CACGGCGTCTGGAATGCAGGATGAGGTCAGAGCGGTTGGCGAGGAGCAAAGGTCAGAGGAGCCAAAGCGCAGGGTGGATACTTCAGTGTCTTGGGAGGCGTTGATTTGTGTCGGATCGTCCAAGAAGAGAGCGAGGAAGG	CACGGCGTCTGGAATGCAGGATGAGGTCAGAGCGGTTGGCGAGGAGCAAAGGTCAGAGGAGCCAAAGCGCAGGGTGGATGCTGCAGTGGCTTGGGAGGCGTTGATTTGTGTCGGAGCGGCCAAGAAGAGAGCGAGGAAGG	29	Base change	VKSATLSSTESTASGMQDEVRAVGEEQRSEEPKRRVDAAVAWEALICVGAAKKRARKASSSDDEGGPRTLGGDGHRAEEASKDKE	VKSATLSSTESTASGMQDEVRAVGEEQRSEEPKRRVDTSVSWEALICVGSSKKRARKASSSDDEGGPRTLGGDGHRAEEASKDKE
CACGGCGTCTGGAATGCAGGATGAGGTCAGAGCGGTTGGCGAGGAGCAAAGGTCAGAGGAGCCAAAGCGCAGGGTGGATACTTCAGTGTCTTGGGAGGCGTTGATTTGTGTCGGATCGTCCAAGAAGAGAGCGAGGAAGG	CACGGCGTCTGGAATGCAGGATGAGGTCAGAGCGGTTGGCGAGGAGCAAAGGTCAGAGGAGCCAAAGCGCAGGGTGGATGCTGCAGTGGCTTGGGAGGCGTTGATTTGTGTCGGAGCGGCCAAGAAGAGAGCGAGGAAGG	28	Base change	VKSATLSSTESTASGMQDEVRAVGEEQRSEEPKRRVDAAVAWEALICVGAAKKRARKASSSDDEGGPRTLGGDGHRAEEASKDKE	VKSATLSSTESTASGMQDEVRAVGEEQRSEEPKRRVDTSVSWEALICVGSSKKRARKASSSDDEGGPRTLGGDGHRAEEASKDKE
CACGGCGTCTGGAATGCAGGATGAGGTCAGAGCGGTTGGCGAGGAGCAAAGGTCAGAGGAGCCAAAGCGCAGGGTGGATACTTCAGTGTCTTGGGAGGCGTTGATTTGTGTCGGATCGTCCAAGAAGAGAGCGAGGAAGG	CACGGCGTCTGGAATGCAGGATGAGGTCAGAGCGGTTGGCGAGGAGCAAAGGTCAGAGGAGCCAAAGCGCAGGGTGGATGCTGCAGTGGCTTGGGAGGCGTTGATTTGTGTCGGAGCGGCCAAGAAGAGAGCGAGGAAGG	28	Base change	VKSATLSSTESTASGMQDEVRAVGEEQRSEEPKRRVDAAVAWEALICVGAAKKRARKASSSDDEGGPRTLGGDGHRAEEASKDKE	VKSATLSSTESTASGMQDEVRAVGEEQRSEEPKRRVDTSVSWEALICVGSSKKRARKASSSDDEGGPRTLGGDGHRAEEASKDKE
CACGGCGTCTGGAATGCAGGATGAGGTCAGAGCGGTTGGCGAGGAGCAAAGGTCAGAGGAGCCAAAGCGCAGGGTGGATACTTCAGTGTCTTGGGAGGCGTTGATTTGTGTCGGATCGTCCAAGAAGAGAGCGAGGAAGG	CACGGCGTCTGGAATGCAGGATGAGGTCAGAGCGGTTGGCGAGGAGCAAAGGTCAGAGGAGCCAAAGCGCAGGGTGGATGCTGCAGTGGCTTGGGAGGCGTTGATTTGTGTCGGAGCGGCCAAGAAGAGAGCGAGGAAGG	27	Base change	VKSATLSSTESTASGMQDEVRAVGEEQRSEEPKRRVDAAVAWEALICVGAAKKRARKASSSDDEGGPRTLGGDGHRAEEASKDKE	VKSATLSSTESTASGMQDEVRAVGEEQRSEEPKRRVDTSVSWEALICVGSSKKRARKASSSDDEGGPRTLGGDGHRAEEASKDKE
CACGGCGTCTGGAATGCAGGATGAGGTCAGAGCGGTTGGCGAGGAGCAAAGGTCAGAGGAGCCAAAGCGCAGGGTGGATACTTCAGTGTCTTGGGAGGCGTTGATTTGTGTCGGATCGTCCAAGAAGAGAGCGAGGAAGG	CACGGCGTCTGGAATGCAGGATGAGGTCAGAGCGGTTGGCGAGGAGCAAAGGTCAGAGGAGCCAAAGCGCAGGGTGGATGCTGCAGTGGCTTGGGAGGCGTTGATTTGTGTCGGAGCGGCCAAGAAGAGAGCGAGGAAGG	26	Base change	VKSATLSSTESTASGMQDEVRAVGEEQRSEEPKRRVDAAVAWEALICVGAAKKRARKASSSDDEGGPRTLGGDGHRAEEASKDKE	VKSATLSSTESTASGMQDEVRAVGEEQRSEEPKRRVDTSVSWEALICVGSSKKRARKASSSDDEGGPRTLGGDGHRAEEASKDKE
CACGGCGTCTGGAATGCAGGATGAGGTCAGAGCGGTTGGCGAGGAGCAAAGGTCAGAGGAGCCAAAGCGCAGGGTGGATACTTCAGTGTCTTGGGAGGCGTTGATTTGTGTCGGATCGTCCAAGAAGAGAGCGAGGAAGG	CACGGCGTCTGGAATGCAGGATGAGGTCAGAGCGGTTGGCGAGGAGCAAAGGTCAGAGGAGCCAAAGCGCAGGGTGGATGCTGCAGTGGCTTGGGAGGCGTTGATTTGTGTCGGAGCGGCCAAGAAGAGAGCGAGGAAGG	26	Base change	VKSATLSSTESTASGMQDEVRAVGEEQRSEEPKRRVDAAVAWEALICVGAAKKRARKASSSDDEGGPRTLGGDGHRAEEASKDKE	VKSATLSSTESTASGMQDEVRAVGEEQRSEEPKRRVDTSVSWEALICVGSSKKRARKASSSDDEGGPRTLGGDGHRAEEASKDKE
CACGGCGTCTGGAATGCAGGATGAGGTCAGAGCGGTTGGCGAGGAGCAAAGGTCAGAGGAGCCAAAGCGCAGGGTGGATACTTCAGTGTCTTGGGAGGCGTTGATTTGTGTCGGATCGTCCAAGAAGAGAGCGAGGAAGG	CACGGCGTCTGGAATGCAGGATGAGGTCAGAGCGGTTGGCGAGGAGCAAAGGTCAGAGGAGCCAAAGCGCAGGGTGGATGCTGCAGTGGCTTGGGAGGCGTTGATTTGTGTCGGAGCGGCCAAGAAGAGAGCGAGGAAGG	24	Base change	VKSATLSSTESTASGMQDEVRAVGEEQRSEEPKRRVDAAVAWEALICVGAAKKRARKASSSDDEGGPRTLGGDGHRAEEASKDKE	VKSATLSSTESTASGMQDEVRAVGEEQRSEEPKRRVDTSVSWEALICVGSSKKRARKASSSDDEGGPRTLGGDGHRAEEASKDKE
CACGGCGTCTGGAATGCAGGATGAGGTCAGAGCGGTTGGCGAGGAGCAAAGGTCAGAGGAGCCAAAGCGCAGGGTGGATACTTCAGTGTCTTGGGAGGCGTTGATTTGTGTCGGATCGTCCAAGAAGAGAGCGAGGAAGG	CACGGCGTCTGGAATGCAGGATGAGGTCAGAGCGGTTGGCGAGGAGCAAAGGTCAGAGGAGCCAAAGCGCAGGGTGGATGCTGCAGTGGCTTGGGAGGCGTTGATTTGTGTCGGAGCGGCCAAGAAGAGAGCGAGGAAGG	22	Base change	VKSATLSSTESTASGMQDEVRAVGEEQRSEEPKRRVDAAVAWEALICVGAAKKRARKASSSDDEGGPRTLGGDGHRAEEASKDKE	VKSATLSSTESTASGMQDEVRAVGEEQRSEEPKRRVDTSVSWEALICVGSSKKRARKASSSDDEGGPRTLGGDGHRAEEASKDKE
CACGGCGTCTGGAATGCAGGATGAGGTCAGAGCGGTTGGCGAGGAGCAAAGGTCAGAGGAGCCAAAGCGCAGGGTGGATACTTCAGTGTCTTGGGAGGCGTTGATTTGTGTCGGATCGTCCAAGAAGAGAGCGAGGAAGG	CACGGCGTCTGGAATGCAGGATGAGGTCAGAGCGGTTGGCGAGGAGCAAAGGTCAGAGGAGCCAAAGCGCAGGGTGGATGCTGCAGTGGCTTGGGAGGCGTTGATTTGTGTCGGAGCGGCCAAGAAGAGAGCGAGGAAGG	22	Base change	VKSATLSSTESTASGMQDEVRAVGEEQRSEEPKRRVDAAVAWEALICVGAAKKRARKASSSDDEGGPRTLGGDGHRAEEASKDKE	VKSATLSSTESTASGMQDEVRAVGEEQRSEEPKRRVDTSVSWEALICVGSSKKRARKASSSDDEGGPRTLGGDGHRAEEASKDKE
CACGGCGTCTGGAATGCAGGATGAGGTCAGAGCGGTTGGCGAGGAGCAAAGGTCAGAGGAGCCAAAGCGCAGGGTGGATACTTCAGTGTCTTGGGAGGCGTTGATTTGTGTCGGATCGTCCAAGAAGAGAGCGAGGAAGG	CACGGCGTCTGGAATGCAGGATGAGGTCAGAGCGGTTGGCGAGGAGCAAAGGTCAGAGGAGCCAAAGCGCAGGGTGGATGCTGCAGTGGCTTGGGAGGCGTTGATTTGTGTCGGAGCGGCCAAGAAGAGAGCGAGGAAGG	22	Base change	VKSATLSSTESTASGMQDEVRAVGEEQRSEEPKRRVDAAVAWEALICVGAAKKRARKASSSDDEGGPRTLGGDGHRAEEASKDKE	VKSATLSSTESTASGMQDEVRAVGEEQRSEEPKRRVDTSVSWEALICVGSSKKRARKASSSDDEGGPRTLGGDGHRAEEASKDKE
CACGGCGTCTGGAATGCAGGATGAGGTCAGAGCGGTTGGCGAGGAGCAAAGGTCAGAGGAGCCAAAGCGCAGGGTGGATACTTCAGTGTCTTGGGAGGCGTTGATTTGTGTCGGATCGTCCAAGAAGAGAGCGAGGAAGG	CACGGCGTCTGGAATGCAGGATGAGGTCAGAGCGGTTGGCGAGGAGCAAAGGTCAGAGGAGCCAAAGCGCAGGGTGGATGCTGCAGTGGCTTGGGAGGCGTTGATTTGTGTCGGAGCGGCCAAGAAGAGAGCGAGGAAGG	21	Base change	VKSATLSSTESTASGMQDEVRAVGEEQRSEEPKRRVDAAVAWEALICVGAAKKRARKASSSDDEGGPRTLGGDGHRAEEASKDKE	VKSATLSSTESTASGMQDEVRAVGEEQRSEEPKRRVDTSVSWEALICVGSSKKRARKASSSDDEGGPRTLGGDGHRAEEASKDKE
CACGGCGTCTGGAATGCAGGATGAGGTCAGAGCGGTTGGCGAGGAGCAAAGGTCAGAGGAGCCAAAGCGCAGGGTGGATACTTCAGTGTCTTGGGAGGCGTTGATTTGTGTCGGATCGTCCAAGAAGAGAGCGAGGAAGG	CACGGCGTCTGGAATGCAGGATGAGGTCAGAGCGGTTGGCGAGGAGCAAAGGTCAGAGGAGCCAAAGCGCAGGGTGGATGCTGCAGTGGCTTGGGAGGCGTTGATTTGTGTCGGAGCGGCCAAGAAGAGAGCGAGGAAGG	21	Base change	VKSATLSSTESTASGMQDEVRAVGEEQRSEEPKRRVDAAVAWEALICVGAAKKRARKASSSDDEGGPRTLGGDGHRAEEASKDKE	VKSATLSSTESTASGMQDEVRAVGEEQRSEEPKRRVDTSVSWEALICVGSSKKRARKASSSDDEGGPRTLGGDGHRAEEASKDKE
CACGGCGTCTGGAATGCAGGATGAGGTCAGAGCGGTTGGCGAGGAGCAAAGGTCAGAGGAGCCAAAGCGCAGGGTGGATACTTCAGTGTCTTGGGAGGCGTTGATTTGTGTCGGATCGTCCAAGAAGAGAGCGAGGAAGG	CACGGCGTCTGGAATGCAGGATGAGGTCAGAGCGGTTGGCGAGGAGCAAAGGTCAGAGGAGCCAAAGCGCAGGGTGGATGCTGCAGTGGCTTGGGAGGCGTTGATTTGTGTCGGAGCGGCCAAGAAGAGAGCGAGGAAGG	21	Base change	VKSATLSSTESTASGMQDEVRAVGEEQRSEEPKRRVDAAVAWEALICVGAAKKRARKASSSDDEGGPRTLGGDGHRAEEASKDKE	VKSATLSSTESTASGMQDEVRAVGEEQRSEEPKRRVDTSVSWEALICVGSSKKRARKASSSDDEGGPRTLGGDGHRAEEASKDKE
CACGGCGTCTGGAATGCAGGATGAGGTCAGAGCGGTTGGCGAGGAGCAAAGGTCAGAGGAGCCAAAGCGCAGGGTGGATACTTCAGTGTCTTGGGAGGCGTTGATTTGTGTCGGATCGTCCAAGAAGAGAGCGAGGAAGG	CACGGCGTCTGGAATGCAGGATGAGGTCAGAGCGGTTGGCGAGGAGCAAAGGTCAGAGGAGCCAAAGCGCAGGGTGGATGCTGCAGTGGCTTGGGAGGCGTTGATTTGTGTCGGAGCGGCCAAGAAGAGAGCGAGGAAGG	21	Base change	VKSATLSSTESTASGMQDEVRAVGEEQRSEEPKRRVDAAVAWEALICVGAAKKRARKASSSDDEGGPRTLGGDGHRAEEASKDKE	VKSATLSSTESTASGMQDEVRAVGEEQRSEEPKRRVDTSVSWEALICVGSSKKRARKASSSDDEGGPRTLGGDGHRAEEASKDKE
CACGGCGTCTGGAATGCAGGATGAGGTCAGAGCGGTTGGCGAGGAGCAAAGGTCAGAGGAGCCAAAGCGCAGGGTGGATACTTCAGTGTCTTGGGAGGCGTTGATTTGTGTCGGATCGTCCAAGAAGAGAGCGAGGAAGG	CACGGCGTCTGGAATGCAGGATGAGGTCAGAGCGGTTGGCGAGGAGCAAAGGTCAGAGGAGCCAAAGCGCAGGGTGGATGCTGCAGTGGCTTGGGAGGCGTTGATTTGTGTCGGAGCGGCCAAGAAGAGAGCGAGGAAGG	19	Base change	VKSATLSSTESTASGMQDEVRAVGEEQRSEEPKRRVDAAVAWEALICVGAAKKRARKASSSDDEGGPRTLGGDGHRAEEASKDKE	VKSATLSSTESTASGMQDEVRAVGEEQRSEEPKRRVDTSVSWEALICVGSSKKRARKASSSDDEGGPRTLGGDGHRAEEASKDKE
CACGGCGTCTGGAATGCAGGATGAGGTCAGAGCGGTTGGCGAGGAGCAAAGGTCAGAGGAGCCAAAGCGCAGGGTGGATACTTCAGTGTCTTGGGAGGCGTTGATTTGTGTCGGATCGTCCAAGAAGAGAGCGAGGAAGG	CACGGCGTCTGGAATGCAGGATGAGGTCAGAGCGGTTGGCGAGGAGCAAAGGTCAGAGGAGCCAAAGCGCAGGGTGGATGCTGCAGTGGCTTGGGAGGCGTTGATTTGTGTCGGAGCGGCCAAGAAGAGAGCGAGGAAGG	17	Base change	VKSATLSSTESTASGMQDEVRAVGEEQRSEEPKRRVDAAVAWEALICVGAAKKRARKASSSDDEGGPRTLGGDGHRAEEASKDKE	VKSATLSSTESTASGMQDEVRAVGEEQRSEEPKRRVDTSVSWEALICVGSSKKRARKASSSDDEGGPRTLGGDGHRAEEASKDKE
CACGGCGTCTGGAATGCAGGATGAGGTCAGAGCGGTTGGCGAGGAGCAAAGGTCAGAGGAGCCAAAGCGCAGGGTGGATACTTCAGTGTCTTGGGAGGCGTTGATTTGTGTCGGATCGTCCAAGAAGAGAGCGAGGAAGG	CACGGCGTCTGGAATGCAGGATGAGGTCAGAGCGGTTGGCGAGGAGCAAAGGTCAGAGGAGCCAAAGCGCAGGGTGGATGCTGCAGTGGCTTGGGAGGCGTTGATTTGTGTCGGAGCGGCCAAGAAGAGAGCGAGGAAGG	16	Base change	VKSATLSSTESTASGMQDEVRAVGEEQRSEEPKRRVDAAVAWEALICVGAAKKRARKASSSDDEGGPRTLGGDGHRAEEASKDKE	VKSATLSSTESTASGMQDEVRAVGEEQRSEEPKRRVDTSVSWEALICVGSSKKRARKASSSDDEGGPRTLGGDGHRAEEASKDKE
CACGGCGTCTGGAATGCAGGATGAGGTCAGAGCGGTTGGCGAGGAGCAAAGGTCAGAGGAGCCAAAGCGCAGGGTGGATACTTCAGTGTCTTGGGAGGCGTTGATTTGTGTCGGATCGTCCAAGAAGAGAGCGAGGAAGG	CACGGCGTCTGGAATGCAGGATGAGGTCAGAGCGGTTGGCGAGGAGCAAAGGTCAGAGGAGCCAAAGCGCAGGGTGGATGCTGCAGTGGCTTGGGAGGCGTTGATTTGTGTCGGAGCGGCCAAGAAGAGAGCGAGGAAGG	16	Base change	VKSATLSSTESTASGMQDEVRAVGEEQRSEEPKRRVDAAVAWEALICVGAAKKRARKASSSDDEGGPRTLGGDGHRAEEASKDKE	VKSATLSSTESTASGMQDEVRAVGEEQRSEEPKRRVDTSVSWEALICVGSSKKRARKASSSDDEGGPRTLGGDGHRAEEASKDKE
CACGGCGTCTGGAATGCAGGATGAGGTCAGAGCGGTTGGCGAGGAGCAAAGGTCAGAGGAGCCAAAGCGCAGGGTGGATACTTCAGTGTCTTGGGAGGCGTTGATTTGTGTCGGATCGTCCAAGAAGAGAGCGAGGAAGG	CACGGCGTCTGGAATGCAGGATGAGGTCAGAGCGGTTGGCGAGGAGCAAAGGTCAGAGGAGCCAAAGCGCAGGGTGGATGCTGCAGTGGCTTGGGAGGCGTTGATTTGTGTCGGAGCGGCCAAGAAGAGAGCGAGGAAGG	16	Base change	VKSATLSSTESTASGMQDEVRAVGEEQRSEEPKRRVDAAVAWEALICVGAAKKRARKASSSDDEGGPRTLGGDGHRAEEASKDKE	VKSATLSSTESTASGMQDEVRAVGEEQRSEEPKRRVDTSVSWEALICVGSSKKRARKASSSDDEGGPRTLGGDGHRAEEASKDKE
CACGGCGTCTGGAATGCAGGATGAGGTCAGAGCGGTTGGCGAGGAGCAAAGGTCAGAGGAGCCAAAGCGCAGGGTGGATACTTCAGTGTCTTGGGAGGCGTTGATTTGTGTCGGATCGTCCAAGAAGAGAGCGAGGAAGG	CACGGCGTCTGGAATGCAGGATGAGGTCAGAGCGGTTGGCGAGGAGCAAAGGTCAGAGGAGCCAAAGCGCAGGGTGGATGCTGCAGTGGCTTGGGAGGCGTTGATTTGTGTCGGAGCGGCCAAGAAGAGAGCGAGGAAGG	15	Base change	VKSATLSSTESTASGMQDEVRAVGEEQRSEEPKRRVDAAVAWEALICVGAAKKRARKASSSDDEGGPRTLGGDGHRAEEASKDKE	VKSATLSSTESTASGMQDEVRAVGEEQRSEEPKRRVDTSVSWEALICVGSSKKRARKASSSDDEGGPRTLGGDGHRAEEASKDKE
CACGGCGTCTGGAATGCAGGATGAGGTCAGAGCGGTTGGCGAGGAGCAAAGGTCAGAGGAGCCAAAGCGCAGGGTGGATACTTCAGTGTCTTGGGAGGCGTTGATTTGTGTCGGATCGTCCAAGAAGAGAGCGAGGAAGG	CACGGCGTCTGGAATGCAGGATGAGGTCAGAGCGGTTGGCGAGGAGCAAAGGTCAGAGGAGCCAAAGCGCAGGGTGGATGCTGCAGTGGCTTGGGAGGCGTTGATTTGTGTCGGAGCGGCCAAGAAGAGAGCGAGGAAGG	15	Base change	VKSATLSSTESTASGMQDEVRAVGEEQRSEEPKRRVDAAVAWEALICVGAAKKRARKASSSDDEGGPRTLGGDGHRAEEASKDKE	VKSATLSSTESTASGMQDEVRAVGEEQRSEEPKRRVDTSVSWEALICVGSSKKRARKASSSDDEGGPRTLGGDGHRAEEASKDKE
CACGGCGTCTGGAATGCAGGATGAGGTCAGAGCGGTTGGCGAGGAGCAAAGGTCAGAGGAGCCAAAGCGCAGGGTGGATACTTCAGTGTCTTGGGAGGCGTTGATTTGTGTCGGATCGTCCAAGAAGAGAGCGAGGAAGG	CACGGCGTCTGGAATGCAGGATGAGGTCAGAGCGGTTGGCGAGGAGCAAAGGTCAGAGGAGCCAAAGCGCAGGGTGGATGCTGCAGTGGCTTGGGAGGCGTTGATTTGTGTCGGAGCGGCCAAGAAGAGAGCGAGGAAGG	14	Base change	VKSATLSSTESTASGMQDEVRAVGEEQRSEEPKRRVDAAVAWEALICVGAAKKRARKASSSDDEGGPRTLGGDGHRAEEASKDKE	VKSATLSSTESTASGMQDEVRAVGEEQRSEEPKRRVDTSVSWEALICVGSSKKRARKASSSDDEGGPRTLGGDGHRAEEASKDKE
CACGGCGTCTGGAATGCAGGATGAGGTCAGAGCGGTTGGCGAGGAGCAAAGGTCAGAGGAGCCAAAGCGCAGGGTGGATACTTCAGTGTCTTGGGAGGCGTTGATTTGTGTCGGATCGTCCAAGAAGAGAGCGAGGAAGG	CACGGCGTCTGGAATGCAGGATGAGGTCAGAGCGGTTGGCGAGGAGCAAAGGTCAGAGGAGCCAAAGCGCAGGGTGGATGCTGCAGTGGCTTGGGAGGCGTTGATTTGTGTCGGAGCGGCCAAGAAGAGAGCGAGGAAGG	14	Base change	VKSATLSSTESTASGMQDEVRAVGEEQRSEEPKRRVDAAVAWEALICVGAAKKRARKASSSDDEGGPRTLGGDGHRAEEASKDKE	VKSATLSSTESTASGMQDEVRAVGEEQRSEEPKRRVDTSVSWEALICVGSSKKRARKASSSDDEGGPRTLGGDGHRAEEASKDKE
CACGGCGTCTGGAATGCAGGATGAGGTCAGAGCGGTTGGCGAGGAGCAAAGGTCAGAGGAGCCAAAGCGCAGGGTGGATACTTCAGTGTCTTGGGAGGCGTTGATTTGTGTCGGATCGTCCAAGAAGAGAGCGAGGAAGG	CACGGCGTCTGGAATGCAGGATGAGGTCAGAGCGGTTGGCGAGGAGCAAAGGTCAGAGGAGCCAAAGCGCAGGGTGGATGCTGCAGTGGCTTGGGAGGCGTTGATTTGTGTCGGAGCGGCCAAGAAGAGAGCGAGGAAGG	14	Base change	VKSATLSSTESTASGMQDEVRAVGEEQRSEEPKRRVDAAVAWEALICVGAAKKRARKASSSDDEGGPRTLGGDGHRAEEASKDKE	VKSATLSSTESTASGMQDEVRAVGEEQRSEEPKRRVDTSVSWEALICVGSSKKRARKASSSDDEGGPRTLGGDGHRAEEASKDKE
CACGGCGTCTGGAATGCAGGATGAGGTCAGAGCGGTTGGCGAGGAGCAAAGGTCAGAGGAGCCAAAGCGCAGGGTGGATACTTCAGTGTCTTGGGAGGCGTTGATTTGTGTCGGATCGTCCAAGAAGAGAGCGAGGAAGG	CACGGCGTCTGGAATGCAGGATGAGGTCAGAGCGGTTGGCGAGGAGCAAAGGTCAGAGGAGCCAAAGCGCAGGGTGGATGCTGCAGTGGCTTGGGAGGCGTTGATTTGTGTCGGAGCGGCCAAGAAGAGAGCGAGGAAGG	14	Base change	VKSATLSSTESTASGMQDEVRAVGEEQRSEEPKRRVDAAVAWEALICVGAAKKRARKASSSDDEGGPRTLGGDGHRAEEASKDKE	VKSATLSSTESTASGMQDEVRAVGEEQRSEEPKRRVDTSVSWEALICVGSSKKRARKASSSDDEGGPRTLGGDGHRAEEASKDKE
CACGGCGTCTGGAATGCAGGATGAGGTCAGAGCGGTTGGCGAGGAGCAAAGGTCAGAGGAGCCAAAGCGCAGGGTGGATACTTCAGTGTCTTGGGAGGCGTTGATTTGTGTCGGATCGTCCAAGAAGAGAGCGAGGAAGG	CACGGCGTCTGGAATGCAGGATGAGGTCAGAGCGGTTGGCGAGGAGCAAAGGTCAGAGGAGCCAAAGCGCAGGGTGGATGCTGCAGTGGCTTGGGAGGCGTTGATTTGTGTCGGAGCGGCCAAGAAGAGAGCGAGGAAGG	14	Base change	VKSATLSSTESTASGMQDEVRAVGEEQRSEEPKRRVDAAVAWEALICVGAAKKRARKASSSDDEGGPRTLGGDGHRAEEASKDKE	VKSATLSSTESTASGMQDEVRAVGEEQRSEEPKRRVDTSVSWEALICVGSSKKRARKASSSDDEGGPRTLGGDGHRAEEASKDKE
CACGGCGTCTGGAATGCAGGATGAGGTCAGAGCGGTTGGCGAGGAGCAAAGGTCAGAGGAGCCAAAGCGCAGGGTGGATACTTCAGTGTCTTGGGAGGCGTTGATTTGTGTCGGATCGTCCAAGAAGAGAGCGAGGAAGG	CACGGCGTCTGGAATGCAGGATGAGGTCAGAGCGGTTGGCGAGGAGCAAAGGTCAGAGGAGCCAAAGCGCAGGGTGGATGCTGCAGTGGCTTGGGAGGCGTTGATTTGTGTCGGAGCGGCCAAGAAGAGAGCGAGGAAGG	14	Base change	VKSATLSSTESTASGMQDEVRAVGEEQRSEEPKRRVDAAVAWEALICVGAAKKRARKASSSDDEGGPRTLGGDGHRAEEASKDKE	VKSATLSSTESTASGMQDEVRAVGEEQRSEEPKRRVDTSVSWEALICVGSSKKRARKASSSDDEGGPRTLGGDGHRAEEASKDKE
CACGGCGTCTGGAATGCAGGATGAGGTCAGAGCGGTTGGCGAGGAGCAAAGGTCAGAGGAGCCAAAGCGCAGGGTGGATACTTCAGTGTCTTGGGAGGCGTTGATTTGTGTCGGATCGTCCAAGAAGAGAGCGAGGAAGG	CACGGCGTCTGGAATGCAGGATGAGGTCAGAGCGGTTGGCGAGGAGCAAAGGTCAGAGGAGCCAAAGCGCAGGGTGGATGCTGCAGTGGCTTGGGAGGCGTTGATTTGTGTCGGAGCGGCCAAGAAGAGAGCGAGGAAGG	14	Base change	VKSATLSSTESTASGMQDEVRAVGEEQRSEEPKRRVDAAVAWEALICVGAAKKRARKASSSDDEGGPRTLGGDGHRAEEASKDKE	VKSATLSSTESTASGMQDEVRAVGEEQRSEEPKRRVDTSVSWEALICVGSSKKRARKASSSDDEGGPRTLGGDGHRAEEASKDKE
CACGGCGTCTGGAATGCAGGATGAGGTCAGAGCGGTTGGCGAGGAGCAAAGGTCAGAGGAGCCAAAGCGCAGGGTGGATACTTCAGTGTCTTGGGAGGCGTTGATTTGTGTCGGATCGTCCAAGAAGAGAGCGAGGAAGG	CACGGCGTCTGGAATGCAGGATGAGGTCAGAGCGGTTGGCGAGGAGCAAAGGTCAGAGGAGCCAAAGCGCAGGGTGGATGCTGCAGTGGCTTGGGAGGCGTTGATTTGTGTCGGAGCGGCCAAGAAGAGAGCGAGGAAGG	14	Base change	VKSATLSSTESTASGMQDEVRAVGEEQRSEEPKRRVDAAVAWEALICVGAAKKRARKASSSDDEGGPRTLGGDGHRAEEASKDKE	VKSATLSSTESTASGMQDEVRAVGEEQRSEEPKRRVDTSVSWEALICVGSSKKRARKASSSDDEGGPRTLGGDGHRAEEASKDKE
CACGGCGTCTGGAATGCAGGATGAGGTCAGAGCGGTTGGCGAGGAGCAAAGGTCAGAGGAGCCAAAGCGCAGGGTGGATACTTCAGTGTCTTGGGAGGCGTTGATTTGTGTCGGATCGTCCAAGAAGAGAGCGAGGAAGG	CACGGCGTCTGGAATGCAGGATGAGGTCAGAGCGGTTGGCGAGGAGCAAAGGTCAGAGGAGCCAAAGCGCAGGGTGGATGCTGCAGTGGCTTGGGAGGCGTTGATTTGTGTCGGAGCGGCCAAGAAGAGAGCGAGGAAGG	14	Base change	VKSATLSSTESTASGMQDEVRAVGEEQRSEEPKRRVDAAVAWEALICVGAAKKRARKASSSDDEGGPRTLGGDGHRAEEASKDKE	VKSATLSSTESTASGMQDEVRAVGEEQRSEEPKRRVDTSVSWEALICVGSSKKRARKASSSDDEGGPRTLGGDGHRAEEASKDKE
CACGGCGTCTGGAATGCAGGATGAGGTCAGAGCGGTTGGCGAGGAGCAAAGGTCAGAGGAGCCAAAGCGCAGGGTGGATACTTCAGTGTCTTGGGAGGCGTTGATTTGTGTCGGATCGTCCAAGAAGAGAGCGAGGAAGG	CACGGCGTCTGGAATGCAGGATGAGGTCAGAGCGGTTGGCGAGGAGCAAAGGTCAGAGGAGCCAAAGCGCAGGGTGGATGCTGCAGTGGCTTGGGAGGCGTTGATTTGTGTCGGAGCGGCCAAGAAGAGAGCGAGGAAGG	13	Base change	VKSATLSSTESTASGMQDEVRAVGEEQRSEEPKRRVDAAVAWEALICVGAAKKRARKASSSDDEGGPRTLGGDGHRAEEASKDKE	VKSATLSSTESTASGMQDEVRAVGEEQRSEEPKRRVDTSVSWEALICVGSSKKRARKASSSDDEGGPRTLGGDGHRAEEASKDKE
CACGGCGTCTGGAATGCAGGATGAGGTCAGAGCGGTTGGCGAGGAGCAAAGGTCAGAGGAGCCAAAGCGCAGGGTGGATACTTCAGTGTCTTGGGAGGCGTTGATTTGTGTCGGATCGTCCAAGAAGAGAGCGAGGAAGG	CACGGCGTCTGGAATGCAGGATGAGGTCAGAGCGGTTGGCGAGGAGCAAAGGTCAGAGGAGCCAAAGCGCAGGGTGGATGCTGCAGTGGCTTGGGAGGCGTTGATTTGTGTCGGAGCGGCCAAGAAGAGAGCGAGGAAGG	13	Base change	VKSATLSSTESTASGMQDEVRAVGEEQRSEEPKRRVDAAVAWEALICVGAAKKRARKASSSDDEGGPRTLGGDGHRAEEASKDKE	VKSATLSSTESTASGMQDEVRAVGEEQRSEEPKRRVDTSVSWEALICVGSSKKRARKASSSDDEGGPRTLGGDGHRAEEASKDKE
CACGGCGTCTGGAATGCAGGATGAGGTCAGAGCGGTTGGCGAGGAGCAAAGGTCAGAGGAGCCAAAGCGCAGGGTGGATACTTCAGTGTCTTGGGAGGCGTTGATTTGTGTCGGATCGTCCAAGAAGAGAGCGAGGAAGG	CACGGCGTCTGGAATGCAGGATGAGGTCAGAGCGGTTGGCGAGGAGCAAAGGTCAGAGGAGCCAAAGCGCAGGGTGGATGCTGCAGTGGCTTGGGAGGCGTTGATTTGTGTCGGAGCGGCCAAGAAGAGAGCGAGGAAGG	13	Base change	VKSATLSSTESTASGMQDEVRAVGEEQRSEEPKRRVDAAVAWEALICVGAAKKRARKASSSDDEGGPRTLGGDGHRAEEASKDKE	VKSATLSSTESTASGMQDEVRAVGEEQRSEEPKRRVDTSVSWEALICVGSSKKRARKASSSDDEGGPRTLGGDGHRAEEASKDKE
CACGGCGTCTGGAATGCAGGATGAGGTCAGAGCGGTTGGCGAGGAGCAAAGGTCAGAGGAGCCAAAGCGCAGGGTGGATACTTCAGTGTCTTGGGAGGCGTTGATTTGTGTCGGATCGTCCAAGAAGAGAGCGAGGAAGG	CACGGCGTCTGGAATGCAGGATGAGGTCAGAGCGGTTGGCGAGGAGCAAAGGTCAGAGGAGCCAAAGCGCAGGGTGGATGCTGCAGTGGCTTGGGAGGCGTTGATTTGTGTCGGAGCGGCCAAGAAGAGAGCGAGGAAGG	12	Base change	VKSATLSSTESTASGMQDEVRAVGEEQRSEEPKRRVDAAVAWEALICVGAAKKRARKASSSDDEGGPRTLGGDGHRAEEASKDKE	VKSATLSSTESTASGMQDEVRAVGEEQRSEEPKRRVDTSVSWEALICVGSSKKRARKASSSDDEGGPRTLGGDGHRAEEASKDKE
CACGGCGTCTGGAATGCAGGATGAGGTCAGAGCGGTTGGCGAGGAGCAAAGGTCAGAGGAGCCAAAGCGCAGGGTGGATACTTCAGTGTCTTGGGAGGCGTTGATTTGTGTCGGATCGTCCAAGAAGAGAGCGAGGAAGG	CACGGCGTCTGGAATGCAGGATGAGGTCAGAGCGGTTGGCGAGGAGCAAAGGTCAGAGGAGCCAAAGCGCAGGGTGGATGCTGCAGTGGCTTGGGAGGCGTTGATTTGTGTCGGAGCGGCCAAGAAGAGAGCGAGGAAGG	12	Base change	VKSATLSSTESTASGMQDEVRAVGEEQRSEEPKRRVDAAVAWEALICVGAAKKRARKASSSDDEGGPRTLGGDGHRAEEASKDKE	VKSATLSSTESTASGMQDEVRAVGEEQRSEEPKRRVDTSVSWEALICVGSSKKRARKASSSDDEGGPRTLGGDGHRAEEASKDKE
CACGGCGTCTGGAATGCAGGATGAGGTCAGAGCGGTTGGCGAGGAGCAAAGGTCAGAGGAGCCAAAGCGCAGGGTGGATACTTCAGTGTCTTGGGAGGCGTTGATTTGTGTCGGATCGTCCAAGAAGAGAGCGAGGAAGG	CACGGCGTCTGGAATGCAGGATGAGGTCAGAGCGGTTGGCGAGGAGCAAAGGTCAGAGGAGCCAAAGCGCAGGGTGGATGCTGCAGTGGCTTGGGAGGCGTTGATTTGTGTCGGAGCGGCCAAGAAGAGAGCGAGGAAGG	12	Base change	VKSATLSSTESTASGMQDEVRAVGEEQRSEEPKRRVDAAVAWEALICVGAAKKRARKASSSDDEGGPRTLGGDGHRAEEASKDKE	VKSATLSSTESTASGMQDEVRAVGEEQRSEEPKRRVDTSVSWEALICVGSSKKRARKASSSDDEGGPRTLGGDGHRAEEASKDKE
CACGGCGTCTGGAATGCAGGATGAGGTCAGAGCGGTTGGCGAGGAGCAAAGGTCAGAGGAGCCAAAGCGCAGGGTGGATACTTCAGTGTCTTGGGAGGCGTTGATTTGTGTCGGATCGTCCAAGAAGAGAGCGAGGAAGG	CACGGCGTCTGGAATGCAGGATGAGGTCAGAGCGGTTGGCGAGGAGCAAAGGTCAGAGGAGCCAAAGCGCAGGGTGGATGCTGCAGTGGCTTGGGAGGCGTTGATTTGTGTCGGAGCGGCCAAGAAGAGAGCGAGGAAGG	12	Base change	VKSATLSSTESTASGMQDEVRAVGEEQRSEEPKRRVDAAVAWEALICVGAAKKRARKASSSDDEGGPRTLGGDGHRAEEASKDKE	VKSATLSSTESTASGMQDEVRAVGEEQRSEEPKRRVDTSVSWEALICVGSSKKRARKASSSDDEGGPRTLGGDGHRAEEASKDKE
CACGGCGTCTGGAATGCAGGATGAGGTCAGAGCGGTTGGCGAGGAGCAAAGGTCAGAGGAGCCAAAGCGCAGGGTGGATACTTCAGTGTCTTGGGAGGCGTTGATTTGTGTCGGATCGTCCAAGAAGAGAGCGAGGAAGG	CACGGCGTCTGGAATGCAGGATGAGGTCAGAGCGGTTGGCGAGGAGCAAAGGTCAGAGGAGCCAAAGCGCAGGGTGGATGCTGCAGTGGCTTGGGAGGCGTTGATTTGTGTCGGAGCGGCCAAGAAGAGAGCGAGGAAGG	12	Base change	VKSATLSSTESTASGMQDEVRAVGEEQRSEEPKRRVDAAVAWEALICVGAAKKRARKASSSDDEGGPRTLGGDGHRAEEASKDKE	VKSATLSSTESTASGMQDEVRAVGEEQRSEEPKRRVDTSVSWEALICVGSSKKRARKASSSDDEGGPRTLGGDGHRAEEASKDKE
CACGGCGTCTGGAATGCAGGATGAGGTCAGAGCGGTTGGCGAGGAGCAAAGGTCAGAGGAGCCAAAGCGCAGGGTGGATACTTCAGTGTCTTGGGAGGCGTTGATTTGTGTCGGATCGTCCAAGAAGAGAGCGAGGAAGG	CACGGCGTCTGGAATGCAGGATGAGGTCAGAGCGGTTGGCGAGGAGCAAAGGTCAGAGGAGCCAAAGCGCAGGGTGGATGCTGCAGTGGCTTGGGAGGCGTTGATTTGTGTCGGAGCGGCCAAGAAGAGAGCGAGGAAGG	12	Base change	VKSATLSSTESTASGMQDEVRAVGEEQRSEEPKRRVDAAVAWEALICVGAAKKRARKASSSDDEGGPRTLGGDGHRAEEASKDKE	VKSATLSSTESTASGMQDEVRAVGEEQRSEEPKRRVDTSVSWEALICVGSSKKRARKASSSDDEGGPRTLGGDGHRAEEASKDKE
CACGGCGTCTGGAATGCAGGATGAGGTCAGAGCGGTTGGCGAGGAGCAAAGGTCAGAGGAGCCAAAGCGCAGGGTGGATACTTCAGTGTCTTGGGAGGCGTTGATTTGTGTCGGATCGTCCAAGAAGAGAGCGAGGAAGG	CACGGCGTCTGGAATGCAGGATGAGGTCAGAGCGGTTGGCGAGGAGCAAAGGTCAGAGGAGCCAAAGCGCAGGGTGGATGCTGCAGTGGCTTGGGAGGCGTTGATTTGTGTCGGAGCGGCCAAGAAGAGAGCGAGGAAGG	11	Base change	VKSATLSSTESTASGMQDEVRAVGEEQRSEEPKRRVDAAVAWEALICVGAAKKRARKASSSDDEGGPRTLGGDGHRAEEASKDKE	VKSATLSSTESTASGMQDEVRAVGEEQRSEEPKRRVDTSVSWEALICVGSSKKRARKASSSDDEGGPRTLGGDGHRAEEASKDKE
CACGGCGTCTGGAATGCAGGATGAGGTCAGAGCGGTTGGCGAGGAGCAAAGGTCAGAGGAGCCAAAGCGCAGGGTGGATACTTCAGTGTCTTGGGAGGCGTTGATTTGTGTCGGATCGTCCAAGAAGAGAGCGAGGAAGG	CACGGCGTCTGGAATGCAGGATGAGGTCAGAGCGGTTGGCGAGGAGCAAAGGTCAGAGGAGCCAAAGCGCAGGGTGGATGCTGCAGTGGCTTGGGAGGCGTTGATTTGTGTCGGAGCGGCCAAGAAGAGAGCGAGGAAGG	11	Base change	VKSATLSSTESTASGMQDEVRAVGEEQRSEEPKRRVDAAVAWEALICVGAAKKRARKASSSDDEGGPRTLGGDGHRAEEASKDKE	VKSATLSSTESTASGMQDEVRAVGEEQRSEEPKRRVDTSVSWEALICVGSSKKRARKASSSDDEGGPRTLGGDGHRAEEASKDKE
CACGGCGTCTGGAATGCAGGATGAGGTCAGAGCGGTTGGCGAGGAGCAAAGGTCAGAGGAGCCAAAGCGCAGGGTGGATACTTCAGTGTCTTGGGAGGCGTTGATTTGTGTCGGATCGTCCAAGAAGAGAGCGAGGAAGG	CACGGCGTCTGGAATGCAGGATGAGGTCAGAGCGGTTGGCGAGGAGCAAAGGTCAGAGGAGCCAAAGCGCAGGGTGGATGCTGCAGTGGCTTGGGAGGCGTTGATTTGTGTCGGAGCGGCCAAGAAGAGAGCGAGGAAGG	11	Base change	VKSATLSSTESTASGMQDEVRAVGEEQRSEEPKRRVDAAVAWEALICVGAAKKRARKASSSDDEGGPRTLGGDGHRAEEASKDKE	VKSATLSSTESTASGMQDEVRAVGEEQRSEEPKRRVDTSVSWEALICVGSSKKRARKASSSDDEGGPRTLGGDGHRAEEASKDKE
CACGGCGTCTGGAATGCAGGATGAGGTCAGAGCGGTTGGCGAGGAGCAAAGGTCAGAGGAGCCAAAGCGCAGGGTGGATACTTCAGTGTCTTGGGAGGCGTTGATTTGTGTCGGATCGTCCAAGAAGAGAGCGAGGAAGG	CACGGCGTCTGGAATGCAGGATGAGGTCAGAGCGGTTGGCGAGGAGCAAAGGTCAGAGGAGCCAAAGCGCAGGGTGGATGCTGCAGTGGCTTGGGAGGCGTTGATTTGTGTCGGAGCGGCCAAGAAGAGAGCGAGGAAGG	11	Base change	VKSATLSSTESTASGMQDEVRAVGEEQRSEEPKRRVDAAVAWEALICVGAAKKRARKASSSDDEGGPRTLGGDGHRAEEASKDKE	VKSATLSSTESTASGMQDEVRAVGEEQRSEEPKRRVDTSVSWEALICVGSSKKRARKASSSDDEGGPRTLGGDGHRAEEASKDKE
CACGGCGTCTGGAATGCAGGATGAGGTCAGAGCGGTTGGCGAGGAGCAAAGGTCAGAGGAGCCAAAGCGCAGGGTGGATACTTCAGTGTCTTGGGAGGCGTTGATTTGTGTCGGATCGTCCAAGAAGAGAGCGAGGAAGG	CACGGCGTCTGGAATGCAGGATGAGGTCAGAGCGGTTGGCGAGGAGCAAAGGTCAGAGGAGCCAAAGCGCAGGGTGGATGCTGCAGTGGCTTGGGAGGCGTTGATTTGTGTCGGAGCGGCCAAGAAGAGAGCGAGGAAGG	11	Base change	VKSATLSSTESTASGMQDEVRAVGEEQRSEEPKRRVDAAVAWEALICVGAAKKRARKASSSDDEGGPRTLGGDGHRAEEASKDKE	VKSATLSSTESTASGMQDEVRAVGEEQRSEEPKRRVDTSVSWEALICVGSSKKRARKASSSDDEGGPRTLGGDGHRAEEASKDKE
CACGGCGTCTGGAATGCAGGATGAGGTCAGAGCGGTTGGCGAGGAGCAAAGGTCAGAGGAGCCAAAGCGCAGGGTGGATACTTCAGTGTCTTGGGAGGCGTTGATTTGTGTCGGATCGTCCAAGAAGAGAGCGAGGAAGG	CACGGCGTCTGGAATGCAGGATGAGGTCAGAGCGGTTGGCGAGGAGCAAAGGTCAGAGGAGCCAAAGCGCAGGGTGGATGCTGCAGTGGCTTGGGAGGCGTTGATTTGTGTCGGAGCGGCCAAGAAGAGAGCGAGGAAGG	11	Base change	VKSATLSSTESTASGMQDEVRAVGEEQRSEEPKRRVDAAVAWEALICVGAAKKRARKASSSDDEGGPRTLGGDGHRAEEASKDKE	VKSATLSSTESTASGMQDEVRAVGEEQRSEEPKRRVDTSVSWEALICVGSSKKRARKASSSDDEGGPRTLGGDGHRAEEASKDKE
CACGGCGTCTGGAATGCAGGATGAGGTCAGAGCGGTTGGCGAGGAGCAAAGGTCAGAGGAGCCAAAGCGCAGGGTGGATACTTCAGTGTCTTGGGAGGCGTTGATTTGTGTCGGATCGTCCAAGAAGAGAGCGAGGAAGG	CACGGCGTCTGGAATGCAGGATGAGGTCAGAGCGGTTGGCGAGGAGCAAAGGTCAGAGGAGCCAAAGCGCAGGGTGGATGCTGCAGTGGCTTGGGAGGCGTTGATTTGTGTCGGAGCGGCCAAGAAGAGAGCGAGGAAGG	11	Base change	VKSATLSSTESTASGMQDEVRAVGEEQRSEEPKRRVDAAVAWEALICVGAAKKRARKASSSDDEGGPRTLGGDGHRAEEASKDKE	VKSATLSSTESTASGMQDEVRAVGEEQRSEEPKRRVDTSVSWEALICVGSSKKRARKASSSDDEGGPRTLGGDGHRAEEASKDKE
CACGGCGTCTGGAATGCAGGATGAGGTCAGAGCGGTTGGCGAGGAGCAAAGGTCAGAGGAGCCAAAGCGCAGGGTGGATACTTCAGTGTCTTGGGAGGCGTTGATTTGTGTCGGATCGTCCAAGAAGAGAGCGAGGAAGG	CACGGCGTCTGGAATGCAGGATGAGGTCAGAGCGGTTGGCGAGGAGCAAAGGTCAGAGGAGCCAAAGCGCAGGGTGGATGCTGCAGTGGCTTGGGAGGCGTTGATTTGTGTCGGAGCGGCCAAGAAGAGAGCGAGGAAGG	11	Base change	VKSATLSSTESTASGMQDEVRAVGEEQRSEEPKRRVDAAVAWEALICVGAAKKRARKASSSDDEGGPRTLGGDGHRAEEASKDKE	VKSATLSSTESTASGMQDEVRAVGEEQRSEEPKRRVDTSVSWEALICVGSSKKRARKASSSDDEGGPRTLGGDGHRAEEASKDKE
CACGGCGTCTGGAATGCAGGATGAGGTCAGAGCGGTTGGCGAGGAGCAAAGGTCAGAGGAGCCAAAGCGCAGGGTGGATACTTCAGTGTCTTGGGAGGCGTTGATTTGTGTCGGATCGTCCAAGAAGAGAGCGAGGAAGG	CACGGCGTCTGGAATGCAGGATGAGGTCAGAGCGGTTGGCGAGGAGCAAAGGTCAGAGGAGCCAAAGCGCAGGGTGGATGCTGCAGTGGCTTGGGAGGCGTTGATTTGTGTCGGAGCGGCCAAGAAGAGAGCGAGGAAGG	11	Base change	VKSATLSSTESTASGMQDEVRAVGEEQRSEEPKRRVDAAVAWEALICVGAAKKRARKASSSDDEGGPRTLGGDGHRAEEASKDKE	VKSATLSSTESTASGMQDEVRAVGEEQRSEEPKRRVDTSVSWEALICVGSSKKRARKASSSDDEGGPRTLGGDGHRAEEASKDKE
CACGGCGTCTGGAATGCAGGATGAGGTCAGAGCGGTTGGCGAGGAGCAAAGGTCAGAGGAGCCAAAGCGCAGGGTGGATACTTCAGTGTCTTGGGAGGCGTTGATTTGTGTCGGATCGTCCAAGAAGAGAGCGAGGAAGG	CACGGCGTCTGGAATGCAGGATGAGGTCAGAGCGGTTGGCGAGGAGCAAAGGTCAGAGGAGCCAAAGCGCAGGGTGGATGCTGCAGTGGCTTGGGAGGCGTTGATTTGTGTCGGAGCGGCCAAGAAGAGAGCGAGGAAGG	11	Base change	VKSATLSSTESTASGMQDEVRAVGEEQRSEEPKRRVDAAVAWEALICVGAAKKRARKASSSDDEGGPRTLGGDGHRAEEASKDKE	VKSATLSSTESTASGMQDEVRAVGEEQRSEEPKRRVDTSVSWEALICVGSSKKRARKASSSDDEGGPRTLGGDGHRAEEASKDKE
CACGGCGTCTGGAATGCAGGATGAGGTCAGAGCGGTTGGCGAGGAGCAAAGGTCAGAGGAGCCAAAGCGCAGGGTGGATACTTCAGTGTCTTGGGAGGCGTTGATTTGTGTCGGATCGTCCAAGAAGAGAGCGAGGAAGG	CACGGCGTCTGGAATGCAGGATGAGGTCAGAGCGGTTGGCGAGGAGCAAAGGTCAGAGGAGCCAAAGCGCAGGGTGGATGCTGCAGTGGCTTGGGAGGCGTTGATTTGTGTCGGAGCGGCCAAGAAGAGAGCGAGGAAGG	10	Base change	VKSATLSSTESTASGMQDEVRAVGEEQRSEEPKRRVDAAVAWEALICVGAAKKRARKASSSDDEGGPRTLGGDGHRAEEASKDKE	VKSATLSSTESTASGMQDEVRAVGEEQRSEEPKRRVDTSVSWEALICVGSSKKRARKASSSDDEGGPRTLGGDGHRAEEASKDKE
CACGGCGTCTGGAATGCAGGATGAGGTCAGAGCGGTTGGCGAGGAGCAAAGGTCAGAGGAGCCAAAGCGCAGGGTGGATACTTCAGTGTCTTGGGAGGCGTTGATTTGTGTCGGATCGTCCAAGAAGAGAGCGAGGAAGG	CACGGCGTCTGGAATGCAGGATGAGGTCAGAGCGGTTGGCGAGGAGCAAAGGTCAGAGGAGCCAAAGCGCAGGGTGGATGCTGCAGTGGCTTGGGAGGCGTTGATTTGTGTCGGAGCGGCCAAGAAGAGAGCGAGGAAGG	10	Base change	VKSATLSSTESTASGMQDEVRAVGEEQRSEEPKRRVDAAVAWEALICVGAAKKRARKASSSDDEGGPRTLGGDGHRAEEASKDKE	VKSATLSSTESTASGMQDEVRAVGEEQRSEEPKRRVDTSVSWEALICVGSSKKRARKASSSDDEGGPRTLGGDGHRAEEASKDKE
CACGGCGTCTGGAATGCAGGATGAGGTCAGAGCGGTTGGCGAGGAGCAAAGGTCAGAGGAGCCAAAGCGCAGGGTGGATACTTCAGTGTCTTGGGAGGCGTTGATTTGTGTCGGATCGTCCAAGAAGAGAGCGAGGAAGG	CACGGCGTCTGGAATGCAGGATGAGGTCAGAGCGGTTGGCGAGGAGCAAAGGTCAGAGGAGCCAAAGCGCAGGGTGGATGCTGCAGTGGCTTGGGAGGCGTTGATTTGTGTCGGAGCGGCCAAGAAGAGAGCGAGGAAGG	10	Base change	VKSATLSSTESTASGMQDEVRAVGEEQRSEEPKRRVDAAVAWEALICVGAAKKRARKASSSDDEGGPRTLGGDGHRAEEASKDKE	VKSATLSSTESTASGMQDEVRAVGEEQRSEEPKRRVDTSVSWEALICVGSSKKRARKASSSDDEGGPRTLGGDGHRAEEASKDKE
CACGGCGTCTGGAATGCAGGATGAGGTCAGAGCGGTTGGCGAGGAGCAAAGGTCAGAGGAGCCAAAGCGCAGGGTGGATACTTCAGTGTCTTGGGAGGCGTTGATTTGTGTCGGATCGTCCAAGAAGAGAGCGAGGAAGG	CACGGCGTCTGGAATGCAGGATGAGGTCAGAGCGGTTGGCGAGGAGCAAAGGTCAGAGGAGCCAAAGCGCAGGGTGGATGCTGCAGTGGCTTGGGAGGCGTTGATTTGTGTCGGAGCGGCCAAGAAGAGAGCGAGGAAGG	10	Base change	VKSATLSSTESTASGMQDEVRAVGEEQRSEEPKRRVDAAVAWEALICVGAAKKRARKASSSDDEGGPRTLGGDGHRAEEASKDKE	VKSATLSSTESTASGMQDEVRAVGEEQRSEEPKRRVDTSVSWEALICVGSSKKRARKASSSDDEGGPRTLGGDGHRAEEASKDKE
CACGGCGTCTGGAATGCAGGATGAGGTCAGAGCGGTTGGCGAGGAGCAAAGGTCAGAGGAGCCAAAGCGCAGGGTGGATACTTCAGTGTCTTGGGAGGCGTTGATTTGTGTCGGATCGTCCAAGAAGAGAGCGAGGAAGG	CACGGCGTCTGGAATGCAGGATGAGGTCAGAGCGGTTGGCGAGGAGCAAAGGTCAGAGGAGCCAAAGCGCAGGGTGGATGCTGCAGTGGCTTGGGAGGCGTTGATTTGTGTCGGAGCGGCCAAGAAGAGAGCGAGGAAGG	10	Base change	VKSATLSSTESTASGMQDEVRAVGEEQRSEEPKRRVDAAVAWEALICVGAAKKRARKASSSDDEGGPRTLGGDGHRAEEASKDKE	VKSATLSSTESTASGMQDEVRAVGEEQRSEEPKRRVDTSVSWEALICVGSSKKRARKASSSDDEGGPRTLGGDGHRAEEASKDKE
CACGGCGTCTGGAATGCAGGATGAGGTCAGAGCGGTTGGCGAGGAGCAAAGGTCAGAGGAGCCAAAGCGCAGGGTGGATACTTCAGTGTCTTGGGAGGCGTTGATTTGTGTCGGATCGTCCAAGAAGAGAGCGAGGAAGG	CACGGCGTCTGGAATGCAGGATGAGGTCAGAGCGGTTGGCGAGGAGCAAAGGTCAGAGGAGCCAAAGCGCAGGGTGGATGCTGCAGTGGCTTGGGAGGCGTTGATTTGTGTCGGAGCGGCCAAGAAGAGAGCGAGGAAGG	10	Base change	VKSATLSSTESTASGMQDEVRAVGEEQRSEEPKRRVDAAVAWEALICVGAAKKRARKASSSDDEGGPRTLGGDGHRAEEASKDKE	VKSATLSSTESTASGMQDEVRAVGEEQRSEEPKRRVDTSVSWEALICVGSSKKRARKASSSDDEGGPRTLGGDGHRAEEASKDKE
CACGGCGTCTGGAATGCAGGATGAGGTCAGAGCGGTTGGCGAGGAGCAAAGGTCAGAGGAGCCAAAGCGCAGGGTGGATACTTCAGTGTCTTGGGAGGCGTTGATTTGTGTCGGATCGTCCAAGAAGAGAGCGAGGAAGG	CACGGCGTCTGGAATGCAGGATGAGGTCAGAGCGGTTGGCGAGGAGCAAAGGTCAGAGGAGCCAAAGCGCAGGGTGGATGCTGCAGTGGCTTGGGAGGCGTTGATTTGTGTCGGAGCGGCCAAGAAGAGAGCGAGGAAGG	10	Base change	VKSATLSSTESTASGMQDEVRAVGEEQRSEEPKRRVDAAVAWEALICVGAAKKRARKASSSDDEGGPRTLGGDGHRAEEASKDKE	VKSATLSSTESTASGMQDEVRAVGEEQRSEEPKRRVDTSVSWEALICVGSSKKRARKASSSDDEGGPRTLGGDGHRAEEASKDKE
CACGGCGTCTGGAATGCAGGATGAGGTCAGAGCGGTTGGCGAGGAGCAAAGGTCAGAGGAGCCAAAGCGCAGGGTGGATACTTCAGTGTCTTGGGAGGCGTTGATTTGTGTCGGATCGTCCAAGAAGAGAGCGAGGAAGG	CACGGCGTCTGGAATGCAGGATGAGGTCAGAGCGGTTGGCGAGGAGCAAAGGTCAGAGGAGCCAAAGCGCAGGGTGGATGCTGCAGTGGCTTGGGAGGCGTTGATTTGTGTCGGAGCGGCCAAGAAGAGAGCGAGGAAGG	10	Base change	VKSATLSSTESTASGMQDEVRAVGEEQRSEEPKRRVDAAVAWEALICVGAAKKRARKASSSDDEGGPRTLGGDGHRAEEASKDKE	VKSATLSSTESTASGMQDEVRAVGEEQRSEEPKRRVDTSVSWEALICVGSSKKRARKASSSDDEGGPRTLGGDGHRAEEASKDKE
CACGGCGTCTGGAATGCAGGATGAGGTCAGAGCGGTTGGCGAGGAGCAAAGGTCAGAGGAGCCAAAGCGCAGGGTGGATACTTCAGTGTCTTGGGAGGCGTTGATTTGTGTCGGATCGTCCAAGAAGAGAGCGAGGAAGG	CACGGCGTCTGGAATGCAGGATGAGGTCAGAGCGGTTGGCGAGGAGCAAAGGTCAGAGGAGCCAAAGCGCAGGGTGGATGCTGCAGTGGCTTGGGAGGCGTTGATTTGTGTCGGAGCGGCCAAGAAGAGAGCGAGGAAGG	9	Base change	VKSATLSSTESTASGMQDEVRAVGEEQRSEEPKRRVDAAVAWEALICVGAAKKRARKASSSDDEGGPRTLGGDGHRAEEASKDKE	VKSATLSSTESTASGMQDEVRAVGEEQRSEEPKRRVDTSVSWEALICVGSSKKRARKASSSDDEGGPRTLGGDGHRAEEASKDKE
CACGGCGTCTGGAATGCAGGATGAGGTCAGAGCGGTTGGCGAGGAGCAAAGGTCAGAGGAGCCAAAGCGCAGGGTGGATACTTCAGTGTCTTGGGAGGCGTTGATTTGTGTCGGATCGTCCAAGAAGAGAGCGAGGAAGG	CACGGCGTCTGGAATGCAGGATGAGGTCAGAGCGGTTGGCGAGGAGCAAAGGTCAGAGGAGCCAAAGCGCAGGGTGGATGCTGCAGTGGCTTGGGAGGCGTTGATTTGTGTCGGAGCGGCCAAGAAGAGAGCGAGGAAGG	9	Base change	VKSATLSSTESTASGMQDEVRAVGEEQRSEEPKRRVDAAVAWEALICVGAAKKRARKASSSDDEGGPRTLGGDGHRAEEASKDKE	VKSATLSSTESTASGMQDEVRAVGEEQRSEEPKRRVDTSVSWEALICVGSSKKRARKASSSDDEGGPRTLGGDGHRAEEASKDKE
CACGGCGTCTGGAATGCAGGATGAGGTCAGAGCGGTTGGCGAGGAGCAAAGGTCAGAGGAGCCAAAGCGCAGGGTGGATACTTCAGTGTCTTGGGAGGCGTTGATTTGTGTCGGATCGTCCAAGAAGAGAGCGAGGAAGG	CACGGCGTCTGGAATGCAGGATGAGGTCAGAGCGGTTGGCGAGGAGCAAAGGTCAGAGGAGCCAAAGCGCAGGGTGGATGCTGCAGTGGCTTGGGAGGCGTTGATTTGTGTCGGAGCGGCCAAGAAGAGAGCGAGGAAGG	9	Base change	VKSATLSSTESTASGMQDEVRAVGEEQRSEEPKRRVDAAVAWEALICVGAAKKRARKASSSDDEGGPRTLGGDGHRAEEASKDKE	VKSATLSSTESTASGMQDEVRAVGEEQRSEEPKRRVDTSVSWEALICVGSSKKRARKASSSDDEGGPRTLGGDGHRAEEASKDKE
CACGGCGTCTGGAATGCAGGATGAGGTCAGAGCGGTTGGCGAGGAGCAAAGGTCAGAGGAGCCAAAGCGCAGGGTGGATACTTCAGTGTCTTGGGAGGCGTTGATTTGTGTCGGATCGTCCAAGAAGAGAGCGAGGAAGG	CACGGCGTCTGGAATGCAGGATGAGGTCAGAGCGGTTGGCGAGGAGCAAAGGTCAGAGGAGCCAAAGCGCAGGGTGGATGCTGCAGTGGCTTGGGAGGCGTTGATTTGTGTCGGAGCGGCCAAGAAGAGAGCGAGGAAGG	9	Base change	VKSATLSSTESTASGMQDEVRAVGEEQRSEEPKRRVDAAVAWEALICVGAAKKRARKASSSDDEGGPRTLGGDGHRAEEASKDKE	VKSATLSSTESTASGMQDEVRAVGEEQRSEEPKRRVDTSVSWEALICVGSSKKRARKASSSDDEGGPRTLGGDGHRAEEASKDKE
CACGGCGTCTGGAATGCAGGATGAGGTCAGAGCGGTTGGCGAGGAGCAAAGGTCAGAGGAGCCAAAGCGCAGGGTGGATACTTCAGTGTCTTGGGAGGCGTTGATTTGTGTCGGATCGTCCAAGAAGAGAGCGAGGAAGG	CACGGCGTCTGGAATGCAGGATGAGGTCAGAGCGGTTGGCGAGGAGCAAAGGTCAGAGGAGCCAAAGCGCAGGGTGGATGCTGCAGTGGCTTGGGAGGCGTTGATTTGTGTCGGAGCGGCCAAGAAGAGAGCGAGGAAGG	9	Base change	VKSATLSSTESTASGMQDEVRAVGEEQRSEEPKRRVDAAVAWEALICVGAAKKRARKASSSDDEGGPRTLGGDGHRAEEASKDKE	VKSATLSSTESTASGMQDEVRAVGEEQRSEEPKRRVDTSVSWEALICVGSSKKRARKASSSDDEGGPRTLGGDGHRAEEASKDKE
CACGGCGTCTGGAATGCAGGATGAGGTCAGAGCGGTTGGCGAGGAGCAAAGGTCAGAGGAGCCAAAGCGCAGGGTGGATACTTCAGTGTCTTGGGAGGCGTTGATTTGTGTCGGATCGTCCAAGAAGAGAGCGAGGAAGG	CACGGCGTCTGGAATGCAGGATGAGGTCAGAGCGGTTGGCGAGGAGCAAAGGTCAGAGGAGCCAAAGCGCAGGGTGGATGCTGCAGTGGCTTGGGAGGCGTTGATTTGTGTCGGAGCGGCCAAGAAGAGAGCGAGGAAGG	9	Base change	VKSATLSSTESTASGMQDEVRAVGEEQRSEEPKRRVDAAVAWEALICVGAAKKRARKASSSDDEGGPRTLGGDGHRAEEASKDKE	VKSATLSSTESTASGMQDEVRAVGEEQRSEEPKRRVDTSVSWEALICVGSSKKRARKASSSDDEGGPRTLGGDGHRAEEASKDKE
CACGGCGTCTGGAATGCAGGATGAGGTCAGAGCGGTTGGCGAGGAGCAAAGGTCAGAGGAGCCAAAGCGCAGGGTGGATACTTCAGTGTCTTGGGAGGCGTTGATTTGTGTCGGATCGTCCAAGAAGAGAGCGAGGAAGG	CACGGCGTCTGGAATGCAGGATGAGGTCAGAGCGGTTGGCGAGGAGCAAAGGTCAGAGGAGCCAAAGCGCAGGGTGGATGCTGCAGTGGCTTGGGAGGCGTTGATTTGTGTCGGAGCGGCCAAGAAGAGAGCGAGGAAGG	9	Base change	VKSATLSSTESTASGMQDEVRAVGEEQRSEEPKRRVDAAVAWEALICVGAAKKRARKASSSDDEGGPRTLGGDGHRAEEASKDKE	VKSATLSSTESTASGMQDEVRAVGEEQRSEEPKRRVDTSVSWEALICVGSSKKRARKASSSDDEGGPRTLGGDGHRAEEASKDKE
CACGGCGTCTGGAATGCAGGATGAGGTCAGAGCGGTTGGCGAGGAGCAAAGGTCAGAGGAGCCAAAGCGCAGGGTGGATACTTCAGTGTCTTGGGAGGCGTTGATTTGTGTCGGATCGTCCAAGAAGAGAGCGAGGAAGG	CACGGCGTCTGGAATGCAGGATGAGGTCAGAGCGGTTGGCGAGGAGCAAAGGTCAGAGGAGCCAAAGCGCAGGGTGGATGCTGCAGTGGCTTGGGAGGCGTTGATTTGTGTCGGAGCGGCCAAGAAGAGAGCGAGGAAGG	9	Base change	VKSATLSSTESTASGMQDEVRAVGEEQRSEEPKRRVDAAVAWEALICVGAAKKRARKASSSDDEGGPRTLGGDGHRAEEASKDKE	VKSATLSSTESTASGMQDEVRAVGEEQRSEEPKRRVDTSVSWEALICVGSSKKRARKASSSDDEGGPRTLGGDGHRAEEASKDKE
CACGGCGTCTGGAATGCAGGATGAGGTCAGAGCGGTTGGCGAGGAGCAAAGGTCAGAGGAGCCAAAGCGCAGGGTGGATACTTCAGTGTCTTGGGAGGCGTTGATTTGTGTCGGATCGTCCAAGAAGAGAGCGAGGAAGG	CACGGCGTCTGGAATGCAGGATGAGGTCAGAGCGGTTGGCGAGGAGCAAAGGTCAGAGGAGCCAAAGCGCAGGGTGGATGCTGCAGTGGCTTGGGAGGCGTTGATTTGTGTCGGAGCGGCCAAGAAGAGAGCGAGGAAGG	9	Base change	VKSATLSSTESTASGMQDEVRAVGEEQRSEEPKRRVDAAVAWEALICVGAAKKRARKASSSDDEGGPRTLGGDGHRAEEASKDKE	VKSATLSSTESTASGMQDEVRAVGEEQRSEEPKRRVDTSVSWEALICVGSSKKRARKASSSDDEGGPRTLGGDGHRAEEASKDKE
CACGGCGTCTGGAATGCAGGATGAGGTCAGAGCGGTTGGCGAGGAGCAAAGGTCAGAGGAGCCAAAGCGCAGGGTGGATACTTCAGTGTCTTGGGAGGCGTTGATTTGTGTCGGATCGTCCAAGAAGAGAGCGAGGAAGG	CACGGCGTCTGGAATGCAGGATGAGGTCAGAGCGGTTGGCGAGGAGCAAAGGTCAGAGGAGCCAAAGCGCAGGGTGGATGCTGCAGTGGCTTGGGAGGCGTTGATTTGTGTCGGAGCGGCCAAGAAGAGAGCGAGGAAGG	9	Base change	VKSATLSSTESTASGMQDEVRAVGEEQRSEEPKRRVDAAVAWEALICVGAAKKRARKASSSDDEGGPRTLGGDGHRAEEASKDKE	VKSATLSSTESTASGMQDEVRAVGEEQRSEEPKRRVDTSVSWEALICVGSSKKRARKASSSDDEGGPRTLGGDGHRAEEASKDKE
CACGGCGTCTGGAATGCAGGATGAGGTCAGAGCGGTTGGCGAGGAGCAAAGGTCAGAGGAGCCAAAGCGCAGGGTGGATACTTCAGTGTCTTGGGAGGCGTTGATTTGTGTCGGATCGTCCAAGAAGAGAGCGAGGAAGG	CACGGCGTCTGGAATGCAGGATGAGGTCAGAGCGGTTGGCGAGGAGCAAAGGTCAGAGGAGCCAAAGCGCAGGGTGGATGCTGCAGTGGCTTGGGAGGCGTTGATTTGTGTCGGAGCGGCCAAGAAGAGAGCGAGGAAGG	9	Base change	VKSATLSSTESTASGMQDEVRAVGEEQRSEEPKRRVDAAVAWEALICVGAAKKRARKASSSDDEGGPRTLGGDGHRAEEASKDKE	VKSATLSSTESTASGMQDEVRAVGEEQRSEEPKRRVDTSVSWEALICVGSSKKRARKASSSDDEGGPRTLGGDGHRAEEASKDKE
CACGGCGTCTGGAATGCAGGATGAGGTCAGAGCGGTTGGCGAGGAGCAAAGGTCAGAGGAGCCAAAGCGCAGGGTGGATACTTCAGTGTCTTGGGAGGCGTTGATTTGTGTCGGATCGTCCAAGAAGAGAGCGAGGAAGG	CACGGCGTCTGGAATGCAGGATGAGGTCAGAGCGGTTGGCGAGGAGCAAAGGTCAGAGGAGCCAAAGCGCAGGGTGGATGCTGCAGTGGCTTGGGAGGCGTTGATTTGTGTCGGAGCGGCCAAGAAGAGAGCGAGGAAGG	9	Base change	VKSATLSSTESTASGMQDEVRAVGEEQRSEEPKRRVDAAVAWEALICVGAAKKRARKASSSDDEGGPRTLGGDGHRAEEASKDKE	VKSATLSSTESTASGMQDEVRAVGEEQRSEEPKRRVDTSVSWEALICVGSSKKRARKASSSDDEGGPRTLGGDGHRAEEASKDKE
CACGGCGTCTGGAATGCAGGATGAGGTCAGAGCGGTTGGCGAGGAGCAAAGGTCAGAGGAGCCAAAGCGCAGGGTGGATACTTCAGTGTCTTGGGAGGCGTTGATTTGTGTCGGATCGTCCAAGAAGAGAGCGAGGAAGG	CACGGCGTCTGGAATGCAGGATGAGGTCAGAGCGGTTGGCGAGGAGCAAAGGTCAGAGGAGCCAAAGCGCAGGGTGGATGCTGCAGTGGCTTGGGAGGCGTTGATTTGTGTCGGAGCGGCCAAGAAGAGAGCGAGGAAGG	9	Base change	VKSATLSSTESTASGMQDEVRAVGEEQRSEEPKRRVDAAVAWEALICVGAAKKRARKASSSDDEGGPRTLGGDGHRAEEASKDKE	VKSATLSSTESTASGMQDEVRAVGEEQRSEEPKRRVDTSVSWEALICVGSSKKRARKASSSDDEGGPRTLGGDGHRAEEASKDKE
CACGGCGTCTGGAATGCAGGATGAGGTCAGAGCGGTTGGCGAGGAGCAAAGGTCAGAGGAGCCAAAGCGCAGGGTGGATACTTCAGTGTCTTGGGAGGCGTTGATTTGTGTCGGATCGTCCAAGAAGAGAGCGAGGAAGG	CACGGCGTCTGGAATGCAGGATGAGGTCAGAGCGGTTGGCGAGGAGCAAAGGTCAGAGGAGCCAAAGCGCAGGGTGGATGCTGCAGTGGCTTGGGAGGCGTTGATTTGTGTCGGAGCGGCCAAGAAGAGAGCGAGGAAGG	9	Base change	VKSATLSSTESTASGMQDEVRAVGEEQRSEEPKRRVDAAVAWEALICVGAAKKRARKASSSDDEGGPRTLGGDGHRAEEASKDKE	VKSATLSSTESTASGMQDEVRAVGEEQRSEEPKRRVDTSVSWEALICVGSSKKRARKASSSDDEGGPRTLGGDGHRAEEASKDKE
CACGGCGTCTGGAATGCAGGATGAGGTCAGAGCGGTTGGCGAGGAGCAAAGGTCAGAGGAGCCAAAGCGCAGGGTGGATACTTCAGTGTCTTGGGAGGCGTTGATTTGTGTCGGATCGTCCAAGAAGAGAGCGAGGAAGG	CACGGCGTCTGGAATGCAGGATGAGGTCAGAGCGGTTGGCGAGGAGCAAAGGTCAGAGGAGCCAAAGCGCAGGGTGGATGCTGCAGTGGCTTGGGAGGCGTTGATTTGTGTCGGAGCGGCCAAGAAGAGAGCGAGGAAGG	9	Base change	VKSATLSSTESTASGMQDEVRAVGEEQRSEEPKRRVDAAVAWEALICVGAAKKRARKASSSDDEGGPRTLGGDGHRAEEASKDKE	VKSATLSSTESTASGMQDEVRAVGEEQRSEEPKRRVDTSVSWEALICVGSSKKRARKASSSDDEGGPRTLGGDGHRAEEASKDKE
CACGGCGTCTGGAATGCAGGATGAGGTCAGAGCGGTTGGCGAGGAGCAAAGGTCAGAGGAGCCAAAGCGCAGGGTGGATACTTCAGTGTCTTGGGAGGCGTTGATTTGTGTCGGATCGTCCAAGAAGAGAGCGAGGAAGG	CACGGCGTCTGGAATGCAGGATGAGGTCAGAGCGGTTGGCGAGGAGCAAAGGTCAGAGGAGCCAAAGCGCAGGGTGGATGCTGCAGTGGCTTGGGAGGCGTTGATTTGTGTCGGAGCGGCCAAGAAGAGAGCGAGGAAGG	9	Base change	VKSATLSSTESTASGMQDEVRAVGEEQRSEEPKRRVDAAVAWEALICVGAAKKRARKASSSDDEGGPRTLGGDGHRAEEASKDKE	VKSATLSSTESTASGMQDEVRAVGEEQRSEEPKRRVDTSVSWEALICVGSSKKRARKASSSDDEGGPRTLGGDGHRAEEASKDKE
CACGGCGTCTGGAATGCAGGATGAGGTCAGAGCGGTTGGCGAGGAGCAAAGGTCAGAGGAGCCAAAGCGCAGGGTGGATACTTCAGTGTCTTGGGAGGCGTTGATTTGTGTCGGATCGTCCAAGAAGAGAGCGAGGAAGG	CACGGCGTCTGGAATGCAGGATGAGGTCAGAGCGGTTGGCGAGGAGCAAAGGTCAGAGGAGCCAAAGCGCAGGGTGGATGCTGCAGTGGCTTGGGAGGCGTTGATTTGTGTCGGAGCGGCCAAGAAGAGAGCGAGGAAGG	9	Base change	VKSATLSSTESTASGMQDEVRAVGEEQRSEEPKRRVDAAVAWEALICVGAAKKRARKASSSDDEGGPRTLGGDGHRAEEASKDKE	VKSATLSSTESTASGMQDEVRAVGEEQRSEEPKRRVDTSVSWEALICVGSSKKRARKASSSDDEGGPRTLGGDGHRAEEASKDKE
CACGGCGTCTGGAATGCAGGATGAGGTCAGAGCGGTTGGCGAGGAGCAAAGGTCAGAGGAGCCAAAGCGCAGGGTGGATACTTCAGTGTCTTGGGAGGCGTTGATTTGTGTCGGATCGTCCAAGAAGAGAGCGAGGAAGG	CACGGCGTCTGGAATGCAGGATGAGGTCAGAGCGGTTGGCGAGGAGCAAAGGTCAGAGGAGCCAAAGCGCAGGGTGGATGCTGCAGTGGCTTGGGAGGCGTTGATTTGTGTCGGAGCGGCCAAGAAGAGAGCGAGGAAGG	8	Base change	VKSATLSSTESTASGMQDEVRAVGEEQRSEEPKRRVDAAVAWEALICVGAAKKRARKASSSDDEGGPRTLGGDGHRAEEASKDKE	VKSATLSSTESTASGMQDEVRAVGEEQRSEEPKRRVDTSVSWEALICVGSSKKRARKASSSDDEGGPRTLGGDGHRAEEASKDKE
CACGGCGTCTGGAATGCAGGATGAGGTCAGAGCGGTTGGCGAGGAGCAAAGGTCAGAGGAGCCAAAGCGCAGGGTGGATACTTCAGTGTCTTGGGAGGCGTTGATTTGTGTCGGATCGTCCAAGAAGAGAGCGAGGAAGG	CACGGCGTCTGGAATGCAGGATGAGGTCAGAGCGGTTGGCGAGGAGCAAAGGTCAGAGGAGCCAAAGCGCAGGGTGGATGCTGCAGTGGCTTGGGAGGCGTTGATTTGTGTCGGAGCGGCCAAGAAGAGAGCGAGGAAGG	8	Base change	VKSATLSSTESTASGMQDEVRAVGEEQRSEEPKRRVDAAVAWEALICVGAAKKRARKASSSDDEGGPRTLGGDGHRAEEASKDKE	VKSATLSSTESTASGMQDEVRAVGEEQRSEEPKRRVDTSVSWEALICVGSSKKRARKASSSDDEGGPRTLGGDGHRAEEASKDKE
CACGGCGTCTGGAATGCAGGATGAGGTCAGAGCGGTTGGCGAGGAGCAAAGGTCAGAGGAGCCAAAGCGCAGGGTGGATACTTCAGTGTCTTGGGAGGCGTTGATTTGTGTCGGATCGTCCAAGAAGAGAGCGAGGAAGG	CACGGCGTCTGGAATGCAGGATGAGGTCAGAGCGGTTGGCGAGGAGCAAAGGTCAGAGGAGCCAAAGCGCAGGGTGGATGCTGCAGTGGCTTGGGAGGCGTTGATTTGTGTCGGAGCGGCCAAGAAGAGAGCGAGGAAGG	8	Base change	VKSATLSSTESTASGMQDEVRAVGEEQRSEEPKRRVDAAVAWEALICVGAAKKRARKASSSDDEGGPRTLGGDGHRAEEASKDKE	VKSATLSSTESTASGMQDEVRAVGEEQRSEEPKRRVDTSVSWEALICVGSSKKRARKASSSDDEGGPRTLGGDGHRAEEASKDKE
CACGGCGTCTGGAATGCAGGATGAGGTCAGAGCGGTTGGCGAGGAGCAAAGGTCAGAGGAGCCAAAGCGCAGGGTGGATACTTCAGTGTCTTGGGAGGCGTTGATTTGTGTCGGATCGTCCAAGAAGAGAGCGAGGAAGG	CACGGCGTCTGGAATGCAGGATGAGGTCAGAGCGGTTGGCGAGGAGCAAAGGTCAGAGGAGCCAAAGCGCAGGGTGGATGCTGCAGTGGCTTGGGAGGCGTTGATTTGTGTCGGAGCGGCCAAGAAGAGAGCGAGGAAGG	8	Base change	VKSATLSSTESTASGMQDEVRAVGEEQRSEEPKRRVDAAVAWEALICVGAAKKRARKASSSDDEGGPRTLGGDGHRAEEASKDKE	VKSATLSSTESTASGMQDEVRAVGEEQRSEEPKRRVDTSVSWEALICVGSSKKRARKASSSDDEGGPRTLGGDGHRAEEASKDKE
CACGGCGTCTGGAATGCAGGATGAGGTCAGAGCGGTTGGCGAGGAGCAAAGGTCAGAGGAGCCAAAGCGCAGGGTGGATACTTCAGTGTCTTGGGAGGCGTTGATTTGTGTCGGATCGTCCAAGAAGAGAGCGAGGAAGG	CACGGCGTCTGGAATGCAGGATGAGGTCAGAGCGGTTGGCGAGGAGCAAAGGTCAGAGGAGCCAAAGCGCAGGGTGGATACTTCAGTGTCTTGGGAGGCGTTGATTTGTGTCGGATCATCCAAGAAGAGAGCGAGGAAGG	8	WT	VKSATLSSTESTASGMQDEVRAVGEEQRSEEPKRRVDTSVSWEALICVGSSKKRARKASSSDDEGGPRTLGGDGHRAEEASKDKE	VKSATLSSTESTASGMQDEVRAVGEEQRSEEPKRRVDTSVSWEALICVGSSKKRARKASSSDDEGGPRTLGGDGHRAEEASKDKE
CACGGCGTCTGGAATGCAGGATGAGGTCAGAGCGGTTGGCGAGGAGCAAAGGTCAGAGGAGCCAAAGCGCAGGGTGGATACTTCAGTGTCTTGGGAGGCGTTGATTTGTGTCGGATCGTCCAAGAAGAGAGCGAGGAAGG	CACGGCGTCTGGAATGCAGGATGAGGTCAGAGCGGTTGGCGAGGAGCAAAGGTCAGAGGAGCCAAAGCGCAGGGTGGATACTTCAGTGTCTTGGGAGGCGTTGATTTGTGTCGGATCGTCCAAGAAGAGAGCGAGGACGG	8	WT	VKSATLSSTESTASGMQDEVRAVGEEQRSEEPKRRVDTSVSWEALICVGSSKKRARKASSSDDEGGPRTLGGDGHRAEEASKDKE	VKSATLSSTESTASGMQDEVRAVGEEQRSEEPKRRVDTSVSWEALICVGSSKKRARKASSSDDEGGPRTLGGDGHRAEEASKDKE
CACGGCGTCTGGAATGCAGGATGAGGTCAGAGCGGTTGGCGAGGAGCAAAGGTCAGAGGAGCCAAAGCGCAGGGTGGATACTTCAGTGTCTTGGGAGGCGTTGATTTGTGTCGGATCGTCCAAGAAGAGAGCGAGGAAGG	CACGGCGTCTGGAATGCAGGATGAGGTCAGAGCGGTTGGCGAGGAGCAAAGGTCAGAGGAGCCAAAGCGCTGGGTGGATACTTCAGTGTCTTGGGAGGCGTTGATTTGTGTCGGATCGTCCAAGAAGAGAGCGAGGAAGG	8	WT	VKSATLSSTESTASGMQDEVRAVGEEQRSEEPKRRVDTSVSWEALICVGSSKKRARKASSSDDEGGPRTLGGDGHRAEEASKDKE	VKSATLSSTESTASGMQDEVRAVGEEQRSEEPKRRVDTSVSWEALICVGSSKKRARKASSSDDEGGPRTLGGDGHRAEEASKDKE
CACGGCGTCTGGAATGCAGGATGAGGTCAGAGCGGTTGGCGAGGAGCAAAGGTCAGAGGAGCCAAAGCGCAGGGTGGATACTTCAGTGTCTTGGGAGGCGTTGATTTGTGTCGGATCGTCCAAGAAGAGAGCGAGGAAGG	CACGGCGTCTGGAATGCAGGATGAGGTCAGAGCGGTTGGCGAGGAGCAAAGGTCAGAGGAGCCAAAGCGCAGGGTGGATACTTCAGTGTCTTGGGAGGCGTTGATTTGTGTCGGATCGTCCAAGAAGAGAGCGAGGAAGT	8	WT	VKSATLSSTESTASGMQDEVRAVGEEQRSEEPKRRVDTSVSWEALICVGSSKKRARKASSSDDEGGPRTLGGDGHRAEEASKDKE	VKSATLSSTESTASGMQDEVRAVGEEQRSEEPKRRVDTSVSWEALICVGSSKKRARKASSSDDEGGPRTLGGDGHRAEEASKDKE
CACGGCGTCTGGAATGCAGGATGAGGTCAGAGCGGTTGGCGAGGAGCAAAGGTCAGAGGAGCCAAAGCGCAGGGTGGATACTTCAGTGTCTTGGGAGGCGTTGATTTGTGTCGGATCGTCCAAGAAGAGAGCGAGGAAGG	CACGGCGTCTGGAATGCAGGATGAGGTCAGAGCGGTTGGCAAGGAGCAAAGGTCAGAGGAGCCAAAGCGCAGGGTGGATACTTCAGTGTCTTGGGAGGCGTTGATTTGTGTCGGATCGTCCAAGAAGAGAGCGAGGAAGG	8	WT	VKSATLSSTESTASGMQDEVRAVGEEQRSEEPKRRVDTSVSWEALICVGSSKKRARKASSSDDEGGPRTLGGDGHRAEEASKDKE	VKSATLSSTESTASGMQDEVRAVGEEQRSEEPKRRVDTSVSWEALICVGSSKKRARKASSSDDEGGPRTLGGDGHRAEEASKDKE
CACGGCGTCTGGAATGCAGGATGAGGTCAGAGCGGTTGGCGAGGAGCAAAGGTCAGAGGAGCCAAAGCGCAGGGTGGATACTTCAGTGTCTTGGGAGGCGTTGATTTGTGTCGGATCGTCCAAGAAGAGAGCGAGGAAGG	CACGGCGTCTGGAATACAGGATGAGGTCAGAGCGGTTGGCGAGGAGCAAAGGTCAGAGGAGCCAAAGCGCAGGGTGGATACTTCAGTGTCTTGGGAGGCGTTGATTTGTGTCGGATCGTCCAAGAAGAGAGCGAGGAAGG	8	WT	VKSATLSSTESTASGMQDEVRAVGEEQRSEEPKRRVDTSVSWEALICVGSSKKRARKASSSDDEGGPRTLGGDGHRAEEASKDKE	VKSATLSSTESTASGMQDEVRAVGEEQRSEEPKRRVDTSVSWEALICVGSSKKRARKASSSDDEGGPRTLGGDGHRAEEASKDKE
CACGGCGTCTGGAATGCAGGATGAGGTCAGAGCGGTTGGCGAGGAGCAAAGGTCAGAGGAGCCAAAGCGCAGGGTGGATACTTCAGTGTCTTGGGAGGCGTTGATTTGTGTCGGATCGTCCAAGAAGAGAGCGAGGAAGG	CACGGCGTCTGGAATGCAGGATGAGGTCAGAGCGGTTGGCGAGGATCAAAGGTCAGAGGAGCCAAAGCGCAGGGTGGATACTTCAGTGTCTTGGGAGGCGTTGATTTGTGTCGGATCGTCCAAGAAGAGAGCGAGGAAGG	8	WT	VKSATLSSTESTASGMQDEVRAVGEEQRSEEPKRRVDTSVSWEALICVGSSKKRARKASSSDDEGGPRTLGGDGHRAEEASKDKE	VKSATLSSTESTASGMQDEVRAVGEEQRSEEPKRRVDTSVSWEALICVGSSKKRARKASSSDDEGGPRTLGGDGHRAEEASKDKE
CACGGCGTCTGGAATGCAGGATGAGGTCAGAGCGGTTGGCGAGGAGCAAAGGTCAGAGGAGCCAAAGCGCAGGGTGGATACTTCAGTGTCTTGGGAGGCGTTGATTTGTGTCGGATCGTCCAAGAAGAGAGCGAGGAAGG	CACGGCGTCTGGAATGCAGGATGAGGTCAGAGCGGTTGGCGAGGAGCAAAGGTCAGAGGAGCCAAAGCGCAGGGTGGATACTTCAGTGTCTTGGGAAGCGTTGATTTGTGTCGGATCGTCCAAGAAGAGAGCGAGGAAGG	8	WT	VKSATLSSTESTASGMQDEVRAVGEEQRSEEPKRRVDTSVSWEALICVGSSKKRARKASSSDDEGGPRTLGGDGHRAEEASKDKE	VKSATLSSTESTASGMQDEVRAVGEEQRSEEPKRRVDTSVSWEALICVGSSKKRARKASSSDDEGGPRTLGGDGHRAEEASKDKE
CACGGCGTCTGGAATGCAGGATGAGGTCAGAGCGGTTGGCGAGGAGCAAAGGTCAGAGGAGCCAAAGCGCAGGGTGGATACTTCAGTGTCTTGGGAGGCGTTGATTTGTGTCGGATCGTCCAAGAAGAGAGCGAGGAAGG	CACGGCGTCTGGAATGCAGGATGAGGTCAGAGCTGTTGGCGAGGAGCAAAGGTCAGAGGAGCCAAAGCGCAGGGTGGATACTTCAGTGTCTTGGGAGGCGTTGATTTGTGTCGGATCGTCCAAGAAGAGAGCGAGGAAGG	8	WT	VKSATLSSTESTASGMQDEVRAVGEEQRSEEPKRRVDTSVSWEALICVGSSKKRARKASSSDDEGGPRTLGGDGHRAEEASKDKE	VKSATLSSTESTASGMQDEVRAVGEEQRSEEPKRRVDTSVSWEALICVGSSKKRARKASSSDDEGGPRTLGGDGHRAEEASKDKE
CACGGCGTCTGGAATGCAGGATGAGGTCAGAGCGGTTGGCGAGGAGCAAAGGTCAGAGGAGCCAAAGCGCAGGGTGGATACTTCAGTGTCTTGGGAGGCGTTGATTTGTGTCGGATCGTCCAAGAAGAGAGCGAGGAAGG	CACGGCGTCTGGAATGCAGGATGAGGTCAGAGCGGTTGGCGAGGAGCAAAGGTCAGAGGAGCCAAAGCGCAGGGTGGATATTTCAGTGTCTTGGGAGGCGTTGATTTGTGTCGGATCGTCCAAGAAGAGAGCGAGGAAGG	8	WT	VKSATLSSTESTASGMQDEVRAVGEEQRSEEPKRRVDTSVSWEALICVGSSKKRARKASSSDDEGGPRTLGGDGHRAEEASKDKE	VKSATLSSTESTASGMQDEVRAVGEEQRSEEPKRRVDTSVSWEALICVGSSKKRARKASSSDDEGGPRTLGGDGHRAEEASKDKE
CACGGCGTCTGGAATGCAGGATGAGGTCAGAGCGGTTGGCGAGGAGCAAAGGTCAGAGGAGCCAAAGCGCAGGGTGGATACTTCAGTGTCTTGGGAGGCGTTGATTTGTGTCGGATCGTCCAAGAAGAGAGCGAGGAAGG	CACGGCGTCTGGAATGCAGGATGAGGTCAGAGCGGTTGGCGAAGAGCAAAGGTCAGAGGAGCCAAAGCGCAGGGTGGATACTTCAGTGTCTTGGGAGGCGTTGATTTGTGTCGGATCGTCCAAGAAGAGAGCGAGGAAGG	8	WT	VKSATLSSTESTASGMQDEVRAVGEEQRSEEPKRRVDTSVSWEALICVGSSKKRARKASSSDDEGGPRTLGGDGHRAEEASKDKE	VKSATLSSTESTASGMQDEVRAVGEEQRSEEPKRRVDTSVSWEALICVGSSKKRARKASSSDDEGGPRTLGGDGHRAEEASKDKE
CACGGCGTCTGGAATGCAGGATGAGGTCAGAGCGGTTGGCGAGGAGCAAAGGTCAGAGGAGCCAAAGCGCAGGGTGGATACTTCAGTGTCTTGGGAGGCGTTGATTTGTGTCGGATCGTCCAAGAAGAGAGCGAGGAAGG	CACGGCGTCTGGAATGCAGAATGAGGTCAGAGCGGTTGGCGAGGAGCAAAGGTCAGAGGAGCCAAAGCGCAGGGTGGATACTTCAGTGTCTTGGGAGGCGTTGATTTGTGTCGGATCGTCCAAGAAGAGAGCGAGGAAGG	8	WT	VKSATLSSTESTASGMQDEVRAVGEEQRSEEPKRRVDTSVSWEALICVGSSKKRARKASSSDDEGGPRTLGGDGHRAEEASKDKE	VKSATLSSTESTASGMQDEVRAVGEEQRSEEPKRRVDTSVSWEALICVGSSKKRARKASSSDDEGGPRTLGGDGHRAEEASKDKE
CACGGCGTCTGGAATGCAGGATGAGGTCAGAGCGGTTGGCGAGGAGCAAAGGTCAGAGGAGCCAAAGCGCAGGGTGGATACTTCAGTGTCTTGGGAGGCGTTGATTTGTGTCGGATCGTCCAAGAAGAGAGCGAGGAAGG	CACGGCGTCTGGAATGCAGGATGAGGTCAGAGCGGTTGGCGAGGAGCAAAGGTCAGAGGAGCCAAAGTGCAGGGTGGATACTTCAGTGTCTTGGGAGGCGTTGATTTGTGTCGGATCGTCCAAGAAGAGAGCGAGGAAGG	8	WT	VKSATLSSTESTASGMQDEVRAVGEEQRSEEPKRRVDTSVSWEALICVGSSKKRARKASSSDDEGGPRTLGGDGHRAEEASKDKE	VKSATLSSTESTASGMQDEVRAVGEEQRSEEPKRRVDTSVSWEALICVGSSKKRARKASSSDDEGGPRTLGGDGHRAEEASKDKE
CACGGCGTCTGGAATGCAGGATGAGGTCAGAGCGGTTGGCGAGGAGCAAAGGTCAGAGGAGCCAAAGCGCAGGGTGGATACTTCAGTGTCTTGGGAGGCGTTGATTTGTGTCGGATCGTCCAAGAAGAGAGCGAGGAAGG	CACGGCGTCTGGAATGCAGGATGAGGTCAGAGCGGTTGGCGAGGAGCAAAGGTCAGAGGAGCCAAAGCGCAGGGTGGATACTTCAGTGTCTTGGGAGGCGTTGATTTGTGTCGGATCGTCAAAGAAGAGAGCGAGGAAGG	7	WT	VKSATLSSTESTASGMQDEVRAVGEEQRSEEPKRRVDTSVSWEALICVGSSKKRARKASSSDDEGGPRTLGGDGHRAEEASKDKE	VKSATLSSTESTASGMQDEVRAVGEEQRSEEPKRRVDTSVSWEALICVGSSKKRARKASSSDDEGGPRTLGGDGHRAEEASKDKE
CACGGCGTCTGGAATGCAGGATGAGGTCAGAGCGGTTGGCGAGGAGCAAAGGTCAGAGGAGCCAAAGCGCAGGGTGGATACTTCAGTGTCTTGGGAGGCGTTGATTTGTGTCGGATCGTCCAAGAAGAGAGCGAGGAAGG	CACGGCGTCTGGAATGCAGGATGAGGTCAGAGCGGTTGGCGAGGAGCAATGGTCAGAGGAGCCAAAGCGCAGGGTGGATACTTCAGTGTCTTGGGAGGCGTTGATTTGTGTCGGATCGTCCAAGAAGAGAGCGAGGAAGG	7	WT	VKSATLSSTESTASGMQDEVRAVGEEQRSEEPKRRVDTSVSWEALICVGSSKKRARKASSSDDEGGPRTLGGDGHRAEEASKDKE	VKSATLSSTESTASGMQDEVRAVGEEQRSEEPKRRVDTSVSWEALICVGSSKKRARKASSSDDEGGPRTLGGDGHRAEEASKDKE
CACGGCGTCTGGAATGCAGGATGAGGTCAGAGCGGTTGGCGAGGAGCAAAGGTCAGAGGAGCCAAAGCGCAGGGTGGATACTTCAGTGTCTTGGGAGGCGTTGATTTGTGTCGGATCGTCCAAGAAGAGAGCGAGGAAGG	CACGGCGTCTGGAATGCAGGATGAGGTCAGAGCGGTTGGCGAGGAGCAAAGGTCAGAGGAGCCAAAGCGCAGGGTGGATACTTCAGTGTCTGGGGAGGCGTTGATTTGTGTCGGATCGTCCAAGAAGAGAGCGAGGAAGG	7	WT	VKSATLSSTESTASGMQDEVRAVGEEQRSEEPKRRVDTSVSWEALICVGSSKKRARKASSSDDEGGPRTLGGDGHRAEEASKDKE	VKSATLSSTESTASGMQDEVRAVGEEQRSEEPKRRVDTSVSWEALICVGSSKKRARKASSSDDEGGPRTLGGDGHRAEEASKDKE
CACGGCGTCTGGAATGCAGGATGAGGTCAGAGCGGTTGGCGAGGAGCAAAGGTCAGAGGAGCCAAAGCGCAGGGTGGATACTTCAGTGTCTTGGGAGGCGTTGATTTGTGTCGGATCGTCCAAGAAGAGAGCGAGGAAGG	CACGGCGTCTGGAATGCAGGATGAGGTCAGAGCGGTTGGCGAGGAGCAAAGGTCAGAGGAGCCAAAGCGCAGGGTGGATACTTCAGTGTCTTGGGAGGCGTTGATTTGTGTCGGATCGTCCAAGAAGAGAGCGTGGAAGG	7	WT	VKSATLSSTESTASGMQDEVRAVGEEQRSEEPKRRVDTSVSWEALICVGSSKKRARKASSSDDEGGPRTLGGDGHRAEEASKDKE	VKSATLSSTESTASGMQDEVRAVGEEQRSEEPKRRVDTSVSWEALICVGSSKKRARKASSSDDEGGPRTLGGDGHRAEEASKDKE
CACGGCGTCTGGAATGCAGGATGAGGTCAGAGCGGTTGGCGAGGAGCAAAGGTCAGAGGAGCCAAAGCGCAGGGTGGATACTTCAGTGTCTTGGGAGGCGTTGATTTGTGTCGGATCGTCCAAGAAGAGAGCGAGGAAGG	CACGGCGTCTGGAATGCAGGATGAGGTCAGAGCGGTTGGCGAGGAGCAAAGATCAGAGGAGCCAAAGCGCAGGGTGGATACTTCAGTGTCTTGGGAGGCGTTGATTTGTGTCGGATCGTCCAAGAAGAGAGCGAGGAAGG	7	WT	VKSATLSSTESTASGMQDEVRAVGEEQRSEEPKRRVDTSVSWEALICVGSSKKRARKASSSDDEGGPRTLGGDGHRAEEASKDKE	VKSATLSSTESTASGMQDEVRAVGEEQRSEEPKRRVDTSVSWEALICVGSSKKRARKASSSDDEGGPRTLGGDGHRAEEASKDKE
CACGGCGTCTGGAATGCAGGATGAGGTCAGAGCGGTTGGCGAGGAGCAAAGGTCAGAGGAGCCAAAGCGCAGGGTGGATACTTCAGTGTCTTGGGAGGCGTTGATTTGTGTCGGATCGTCCAAGAAGAGAGCGAGGAAGG	CACGGCGTCTGGAATGCAGGATGAGGTCAGAGCGGTTGACGAGGAGCAAAGGTCAGAGGAGCCAAAGCGCAGGGTGGATACTTCAGTGTCTTGGGAGGCGTTGATTTGTGTCGGATCGTCCAAGAAGAGAGCGAGGAAGG	7	WT	VKSATLSSTESTASGMQDEVRAVGEEQRSEEPKRRVDTSVSWEALICVGSSKKRARKASSSDDEGGPRTLGGDGHRAEEASKDKE	VKSATLSSTESTASGMQDEVRAVGEEQRSEEPKRRVDTSVSWEALICVGSSKKRARKASSSDDEGGPRTLGGDGHRAEEASKDKE
CACGGCGTCTGGAATGCAGGATGAGGTCAGAGCGGTTGGCGAGGAGCAAAGGTCAGAGGAGCCAAAGCGCAGGGTGGATACTTCAGTGTCTTGGGAGGCGTTGATTTGTGTCGGATCGTCCAAGAAGAGAGCGAGGAAGG	CACGGCGTCTGGAATGCAGGATGAGGTCAGAGCGGTTGGTGAGGAGCAAAGGTCAGAGGAGCCAAAGCGCAGGGTGGATACTTCAGTGTCTTGGGAGGCGTTGATTTGTGTCGGATCGTCCAAGAAGAGAGCGAGGAAGG	7	WT	VKSATLSSTESTASGMQDEVRAVGEEQRSEEPKRRVDTSVSWEALICVGSSKKRARKASSSDDEGGPRTLGGDGHRAEEASKDKE	VKSATLSSTESTASGMQDEVRAVGEEQRSEEPKRRVDTSVSWEALICVGSSKKRARKASSSDDEGGPRTLGGDGHRAEEASKDKE
CACGGCGTCTGGAATGCAGGATGAGGTCAGAGCGGTTGGCGAGGAGCAAAGGTCAGAGGAGCCAAAGCGCAGGGTGGATACTTCAGTGTCTTGGGAGGCGTTGATTTGTGTCGGATCGTCCAAGAAGAGAGCGAGGAAGG	CACGGCGTCTGGAATGCAGGATGAGGTCAGAGCGGTTGGCGAGGAGCAAAGGTCAGAAGAGCCAAAGCGCAGGGTGGATACTTCAGTGTCTTGGGAGGCGTTGATTTGTGTCGGATCGTCCAAGAAGAGAGCGAGGAAGG	7	WT	VKSATLSSTESTASGMQDEVRAVGEEQRSEEPKRRVDTSVSWEALICVGSSKKRARKASSSDDEGGPRTLGGDGHRAEEASKDKE	VKSATLSSTESTASGMQDEVRAVGEEQRSEEPKRRVDTSVSWEALICVGSSKKRARKASSSDDEGGPRTLGGDGHRAEEASKDKE
CACGGCGTCTGGAATGCAGGATGAGGTCAGAGCGGTTGGCGAGGAGCAAAGGTCAGAGGAGCCAAAGCGCAGGGTGGATACTTCAGTGTCTTGGGAGGCGTTGATTTGTGTCGGATCGTCCAAGAAGAGAGCGAGGAAGG	CACGACGTCTGGAATGCAGGATGAGGTCAGAGCGGTTGGCGAGGAGCAAAGGTCAGAGGAGCCAAAGCGCAGGGTGGATACTTCAGTGTCTTGGGAGGCGTTGATTTGTGTCGGATCGTCCAAGAAGAGAGCGAGGAAGG	7	WT	VKSATLSSTESTASGMQDEVRAVGEEQRSEEPKRRVDTSVSWEALICVGSSKKRARKASSSDDEGGPRTLGGDGHRAEEASKDKE	VKSATLSSTESTASGMQDEVRAVGEEQRSEEPKRRVDTSVSWEALICVGSSKKRARKASSSDDEGGPRTLGGDGHRAEEASKDKE
CACGGCGTCTGGAATGCAGGATGAGGTCAGAGCGGTTGGCGAGGAGCAAAGGTCAGAGGAGCCAAAGCGCAGGGTGGATACTTCAGTGTCTTGGGAGGCGTTGATTTGTGTCGGATCGTCCAAGAAGAGAGCGAGGAAGG	CACGGCGTCTGGAATGCAGGATGAGGTCAGAGCGGTTGGCGAGGAGCAAAGGTCAGAGGAGTCAAAGCGCAGGGTGGATACTTCAGTGTCTTGGGAGGCGTTGATTTGTGTCGGATCGTCCAAGAAGAGAGCGAGGAAGG	7	WT	VKSATLSSTESTASGMQDEVRAVGEEQRSEEPKRRVDTSVSWEALICVGSSKKRARKASSSDDEGGPRTLGGDGHRAEEASKDKE	VKSATLSSTESTASGMQDEVRAVGEEQRSEEPKRRVDTSVSWEALICVGSSKKRARKASSSDDEGGPRTLGGDGHRAEEASKDKE
CACGGCGTCTGGAATGCAGGATGAGGTCAGAGCGGTTGGCGAGGAGCAAAGGTCAGAGGAGCCAAAGCGCAGGGTGGATACTTCAGTGTCTTGGGAGGCGTTGATTTGTGTCGGATCGTCCAAGAAGAGAGCGAGGAAGG	CACGGCGTCTGGAATGCAGGATGAGGTCAGAGCGGTTGGCGAGGAGCAAAGGTCAGAGGAGCCAAAGCGCAGGGTGGAT------------------------------------------AAGAAGAGAGCGAGGAAGG	7	WT	VKSATLSSTESTASGMQDEVRAVGEEQRSEEPKRRVDTSVSWEALICVGSSKKRARKASSSDDEGGPRTLGGDGHRAEEASKDKE	VKSATLSSTESTASGMQDEVRAVGEEQRSEEPKRRVDTSVSWEALICVGSSKKRARKASSSDDEGGPRTLGGDGHRAEEASKDKE
CACGGCGTCTGGAATGCAGGATGAGGTCAGAGCGGTTGGCGAGGAGCAAAGGTCAGAGGAGCCAAAGCGCAGGGTGGATACTTCAGTGTCTTGGGAGGCGTTGATTTGTGTCGGATCGTCCAAGAAGAGAGCGAGGAAGG	CACGGCGTCTGGAATGCAGGATGAGGTCAGAGCGGTTGGCGTGGAGCAAAGGTCAGAGGAGCCAAAGCGCAGGGTGGATACTTCAGTGTCTTGGGAGGCGTTGATTTGTGTCGGATCGTCCAAGAAGAGAGCGAGGAAGG	7	WT	VKSATLSSTESTASGMQDEVRAVGEEQRSEEPKRRVDTSVSWEALICVGSSKKRARKASSSDDEGGPRTLGGDGHRAEEASKDKE	VKSATLSSTESTASGMQDEVRAVGEEQRSEEPKRRVDTSVSWEALICVGSSKKRARKASSSDDEGGPRTLGGDGHRAEEASKDKE
CACGGCGTCTGGAATGCAGGATGAGGTCAGAGCGGTTGGCGAGGAGCAAAGGTCAGAGGAGCCAAAGCGCAGGGTGGATACTTCAGTGTCTTGGGAGGCGTTGATTTGTGTCGGATCGTCCAAGAAGAGAGCGAGGAAGG	CACGGCGTCTGGAATGCAGGATGAGGTCAGAGCGGTTGGCGAGGAGCAAAGGTCAGTGGAGCCAAAGCGCAGGGTGGATACTTCAGTGTCTTGGGAGGCGTTGATTTGTGTCGGATCGTCCAAGAAGAGAGCGAGGAAGG	7	WT	VKSATLSSTESTASGMQDEVRAVGEEQRSEEPKRRVDTSVSWEALICVGSSKKRARKASSSDDEGGPRTLGGDGHRAEEASKDKE	VKSATLSSTESTASGMQDEVRAVGEEQRSEEPKRRVDTSVSWEALICVGSSKKRARKASSSDDEGGPRTLGGDGHRAEEASKDKE
CACGGCGTCTGGAATGCAGGATGAGGTCAGAGCGGTTGGCGAGGAGCAAAGGTCAGAGGAGCCAAAGCGCAGGGTGGATACTTCAGTGTCTTGGGAGGCGTTGATTTGTGTCGGATCGTCCAAGAAGAGAGCGAGGAAGG	CACGGCGTCTGGAATGCAGGATGAGGTCAGAGCGGTTGGCGAGGAGCAAAGGTCAGAGGAGCCAAAGCGCAGGGTGGATACTTCAGTGTCTTGGGAGGCGTTGATTTGTGTCGTATCGTCCAAGAAGAGAGCGAGGAAGG	6	WT	VKSATLSSTESTASGMQDEVRAVGEEQRSEEPKRRVDTSVSWEALICVGSSKKRARKASSSDDEGGPRTLGGDGHRAEEASKDKE	VKSATLSSTESTASGMQDEVRAVGEEQRSEEPKRRVDTSVSWEALICVGSSKKRARKASSSDDEGGPRTLGGDGHRAEEASKDKE
CACGGCGTCTGGAATGCAGGATGAGGTCAGAGCGGTTGGCGAGGAGCAAAGGTCAGAGGAGCCAAAGCGCAGGGTGGATACTTCAGTGTCTTGGGAGGCGTTGATTTGTGTCGGATCGTCCAAGAAGAGAGCGAGGAAGG	CACGGCGTCTGGAATGCAGGATGAGGTCAGAGCGGTTGGCGAGGAGCAAAGGTCAGAGGAGCCAAAGCGCAGGGTGGATACGTCAGTGTCTTGGGAGGCGTTGATTTGTGTCGGATCGTCCAAGAAGAGAGCGAGGAAGG	6	WT	VKSATLSSTESTASGMQDEVRAVGEEQRSEEPKRRVDTSVSWEALICVGSSKKRARKASSSDDEGGPRTLGGDGHRAEEASKDKE	VKSATLSSTESTASGMQDEVRAVGEEQRSEEPKRRVDTSVSWEALICVGSSKKRARKASSSDDEGGPRTLGGDGHRAEEASKDKE
CACGGCGTCTGGAATGCAGGATGAGGTCAGAGCGGTTGGCGAGGAGCAAAGGTCAGAGGAGCCAAAGCGCAGGGTGGATACTTCAGTGTCTTGGGAGGCGTTGATTTGTGTCGGATCGTCCAAGAAGAGAGCGAGGAAGG	CACGGCGTCTGGAATGCAGGATGAGGTCAGAGCGGTTGGCGAGGAGCAAAGGTCAGAGGAGCCAAAGCGCAGGGTGGATACTTCAGTGTCTTGGAAGGCGTTGATTTGTGTCGGATCGTCCAAGAAGAGAGCGAGGAAGG	6	WT	VKSATLSSTESTASGMQDEVRAVGEEQRSEEPKRRVDTSVSWEALICVGSSKKRARKASSSDDEGGPRTLGGDGHRAEEASKDKE	VKSATLSSTESTASGMQDEVRAVGEEQRSEEPKRRVDTSVSWEALICVGSSKKRARKASSSDDEGGPRTLGGDGHRAEEASKDKE
CACGGCGTCTGGAATGCAGGATGAGGTCAGAGCGGTTGGCGAGGAGCAAAGGTCAGAGGAGCCAAAGCGCAGGGTGGATACTTCAGTGTCTTGGGAGGCGTTGATTTGTGTCGGATCGTCCAAGAAGAGAGCGAGGAAGG	CACGGCGTCTGGAATGCAGGATGAGGTCAGAGCGGTTGGCGAGGAGCAAAGGTCAGAGGAGCCAAAGCGCAGGGTGGATACTTCAGTGTCTTGGGAGGCGTTGATTTGTGTCGGATCGTCTAAGAAGAGAGCGAGGAAGG	6	WT	VKSATLSSTESTASGMQDEVRAVGEEQRSEEPKRRVDTSVSWEALICVGSSKKRARKASSSDDEGGPRTLGGDGHRAEEASKDKE	VKSATLSSTESTASGMQDEVRAVGEEQRSEEPKRRVDTSVSWEALICVGSSKKRARKASSSDDEGGPRTLGGDGHRAEEASKDKE
CACGGCGTCTGGAATGCAGGATGAGGTCAGAGCGGTTGGCGAGGAGCAAAGGTCAGAGGAGCCAAAGCGCAGGGTGGATACTTCAGTGTCTTGGGAGGCGTTGATTTGTGTCGGATCGTCCAAGAAGAGAGCGAGGAAGG	CACGGCGTCTGGAATGCAGGATGAGGTCAGAGCGGTTGGCGAGGAGCAAAGGTCAGAGGTGCCAAAGCGCAGGGTGGATACTTCAGTGTCTTGGGAGGCGTTGATTTGTGTCGGATCGTCCAAGAAGAGAGCGAGGAAGG	6	WT	VKSATLSSTESTASGMQDEVRAVGEEQRSEEPKRRVDTSVSWEALICVGSSKKRARKASSSDDEGGPRTLGGDGHRAEEASKDKE	VKSATLSSTESTASGMQDEVRAVGEEQRSEEPKRRVDTSVSWEALICVGSSKKRARKASSSDDEGGPRTLGGDGHRAEEASKDKE
CACGGCGTCTGGAATGCAGGATGAGGTCAGAGCGGTTGGCGAGGAGCAAAGGTCAGAGGAGCCAAAGCGCAGGGTGGATACTTCAGTGTCTTGGGAGGCGTTGATTTGTGTCGGATCGTCCAAGAAGAGAGCGAGGAAGG	CACGGCGTCTGGAATGCAGGATGAGGTCAGAGCGGTTGGCGAGGAGCAAAGGTCAGAGGAGCCAAAGCGCAGGGTGGATACTTCAGTGTCTTGGGAGGCATTGATTTGTGTCGGATCGTCCAAGAAGAGAGCGAGGAAGG	6	WT	VKSATLSSTESTASGMQDEVRAVGEEQRSEEPKRRVDTSVSWEALICVGSSKKRARKASSSDDEGGPRTLGGDGHRAEEASKDKE	VKSATLSSTESTASGMQDEVRAVGEEQRSEEPKRRVDTSVSWEALICVGSSKKRARKASSSDDEGGPRTLGGDGHRAEEASKDKE
CACGGCGTCTGGAATGCAGGATGAGGTCAGAGCGGTTGGCGAGGAGCAAAGGTCAGAGGAGCCAAAGCGCAGGGTGGATACTTCAGTGTCTTGGGAGGCGTTGATTTGTGTCGGATCGTCCAAGAAGAGAGCGAGGAAGG	CACGGCGTCTGGAATGCAGGATGATGTCAGAGCGGTTGGCGAGGAGCAAAGGTCAGAGGAGCCAAAGCGCAGGGTGGATACTTCAGTGTCTTGGGAGGCGTTGATTTGTGTCGGATCGTCCAAGAAGAGAGCGAGGAAGG	6	WT	VKSATLSSTESTASGMQDEVRAVGEEQRSEEPKRRVDTSVSWEALICVGSSKKRARKASSSDDEGGPRTLGGDGHRAEEASKDKE	VKSATLSSTESTASGMQDEVRAVGEEQRSEEPKRRVDTSVSWEALICVGSSKKRARKASSSDDEGGPRTLGGDGHRAEEASKDKE
CACGGCGTCTGGAATGCAGGATGAGGTCAGAGCGGTTGGCGAGGAGCAAAGGTCAGAGGAGCCAAAGCGCAGGGTGGATACTTCAGTGTCTTGGGAGGCGTTGATTTGTGTCGGATCGTCCAAGAAGAGAGCGAGGAAGG	CACGGCGTCTGGAATGCAGGATGAGGTCAGAGCGGTTGGCGAGGAGCAAATGTCAGAGGAGCCAAAGCGCAGGGTGGATACTTCAGTGTCTTGGGAGGCGTTGATTTGTGTCGGATCGTCCAAGAAGAGAGCGAGGAAGG	6	WT	VKSATLSSTESTASGMQDEVRAVGEEQRSEEPKRRVDTSVSWEALICVGSSKKRARKASSSDDEGGPRTLGGDGHRAEEASKDKE	VKSATLSSTESTASGMQDEVRAVGEEQRSEEPKRRVDTSVSWEALICVGSSKKRARKASSSDDEGGPRTLGGDGHRAEEASKDKE
CACGGCGTCTGGAATGCAGGATGAGGTCAGAGCGGTTGGCGAGGAGCAAAGGTCAGAGGAGCCAAAGCGCAGGGTGGATACTTCAGTGTCTTGGGAGGCGTTGATTTGTGTCGGATCGTCCAAGAAGAGAGCGAGGAAGG	CACGGCGTCTGGAATGCAGGATGAGGTCAGAGCGGTTGGCGAGGAGCAAAGGTCAGAGGAGCCAAAGCGCAGGGTGGATACTTCAGTGTCTTGGGAGGCGTTGATTTGTGACGGATCGTCCAAGAAGAGAGCGAGGAAGG	6	WT	VKSATLSSTESTASGMQDEVRAVGEEQRSEEPKRRVDTSVSWEALICVGSSKKRARKASSSDDEGGPRTLGGDGHRAEEASKDKE	VKSATLSSTESTASGMQDEVRAVGEEQRSEEPKRRVDTSVSWEALICVGSSKKRARKASSSDDEGGPRTLGGDGHRAEEASKDKE
CACGGCGTCTGGAATGCAGGATGAGGTCAGAGCGGTTGGCGAGGAGCAAAGGTCAGAGGAGCCAAAGCGCAGGGTGGATACTTCAGTGTCTTGGGAGGCGTTGATTTGTGTCGGATCGTCCAAGAAGAGAGCGAGGAAGG	CACGGCGTCTGGAATGCAGGATGAGGTCAGAGCGGTTGGCGAGGAGCAAAGGTCAGAGGAGCCAAAGCGCAGGGTGGATACTTCAGTGTCTTGGGAGGCGTTGATTTGTGTCGGATCGTCCAAGTAGAGAGCGAGGAAGG	6	WT	VKSATLSSTESTASGMQDEVRAVGEEQRSEEPKRRVDTSVSWEALICVGSSKKRARKASSSDDEGGPRTLGGDGHRAEEASKDKE	VKSATLSSTESTASGMQDEVRAVGEEQRSEEPKRRVDTSVSWEALICVGSSKKRARKASSSDDEGGPRTLGGDGHRAEEASKDKE
CACGGCGTCTGGAATGCAGGATGAGGTCAGAGCGGTTGGCGAGGAGCAAAGGTCAGAGGAGCCAAAGCGCAGGGTGGATACTTCAGTGTCTTGGGAGGCGTTGATTTGTGTCGGATCGTCCAAGAAGAGAGCGAGGAAGG	CACGGCGTCTGGAATGCAGGATGAGGTCAGAGCGGTTGGCGAGGAGCAAAGGTCAGAGGAGCCAAAGCGCAGGGTGGATACTTCAGTGTCTTGGGAGGCGTTGATTTGTGTCGGATCGTCCAAGAAGAGAGAGAGGAAGG	6	WT	VKSATLSSTESTASGMQDEVRAVGEEQRSEEPKRRVDTSVSWEALICVGSSKKRARKASSSDDEGGPRTLGGDGHRAEEASKDKE	VKSATLSSTESTASGMQDEVRAVGEEQRSEEPKRRVDTSVSWEALICVGSSKKRARKASSSDDEGGPRTLGGDGHRAEEASKDKE
CACGGCGTCTGGAATGCAGGATGAGGTCAGAGCGGTTGGCGAGGAGCAAAGGTCAGAGGAGCCAAAGCGCAGGGTGGATACTTCAGTGTCTTGGGAGGCGTTGATTTGTGTCGGATCGTCCAAGAAGAGAGCGAGGAAGG	CACGGCGTCTGGAATGCAGGATGAGGTCAGAGCGGTTGGCGAGGAGCAAAGGTCAGAGGAGCCATAGCGCAGGGTGGATACTTCAGTGTCTTGGGAGGCGTTGATTTGTGTCGGATCGTCCAAGAAGAGAGCGAGGAAGG	6	WT	VKSATLSSTESTASGMQDEVRAVGEEQRSEEPKRRVDTSVSWEALICVGSSKKRARKASSSDDEGGPRTLGGDGHRAEEASKDKE	VKSATLSSTESTASGMQDEVRAVGEEQRSEEPKRRVDTSVSWEALICVGSSKKRARKASSSDDEGGPRTLGGDGHRAEEASKDKE
CACGGCGTCTGGAATGCAGGATGAGGTCAGAGCGGTTGGCGAGGAGCAAAGGTCAGAGGAGCCAAAGCGCAGGGTGGATACTTCAGTGTCTTGGGAGGCGTTGATTTGTGTCGGATCGTCCAAGAAGAGAGCGAGGAAGG	CATGGCGTCTGGAATGCAGGATGAGGTCAGAGCGGTTGGCGAGGAGCAAAGGTCAGAGGAGCCAAAGCGCAGGGTGGATACTTCAGTGTCTTGGGAGGCGTTGATTTGTGTCGGATCGTCCAAGAAGAGAGCGAGGAAGG	6	WT	VKSATLSSTESTASGMQDEVRAVGEEQRSEEPKRRVDTSVSWEALICVGSSKKRARKASSSDDEGGPRTLGGDGHRAEEASKDKE	VKSATLSSTESTASGMQDEVRAVGEEQRSEEPKRRVDTSVSWEALICVGSSKKRARKASSSDDEGGPRTLGGDGHRAEEASKDKE
CACGGCGTCTGGAATGCAGGATGAGGTCAGAGCGGTTGGCGAGGAGCAAAGGTCAGAGGAGCCAAAGCGCAGGGTGGATACTTCAGTGTCTTGGGAGGCGTTGATTTGTGTCGGATCGTCCAAGAAGAGAGCGAGGAAGG	CACGGCGTCTGGAATGCAGGATGAGGTCAGAGCGGTTGGCGAGGAGCAAAGGTCAGAGGAGCCAAAGCGCAGGGTGGATACTTCAGTGTCTTGGGAGGCGTTGATTTGTGTCGGATCGTTCAAGAAGAGAGCGAGGAAGG	6	WT	VKSATLSSTESTASGMQDEVRAVGEEQRSEEPKRRVDTSVSWEALICVGSSKKRARKASSSDDEGGPRTLGGDGHRAEEASKDKE	VKSATLSSTESTASGMQDEVRAVGEEQRSEEPKRRVDTSVSWEALICVGSSKKRARKASSSDDEGGPRTLGGDGHRAEEASKDKE
CACGGCGTCTGGAATGCAGGATGAGGTCAGAGCGGTTGGCGAGGAGCAAAGGTCAGAGGAGCCAAAGCGCAGGGTGGATACTTCAGTGTCTTGGGAGGCGTTGATTTGTGTCGGATCGTCCAAGAAGAGAGCGAGGAAGG	CACGGCGTCTGGAATGCAGGATGAGGTCAAAGCGGTTGGCGAGGAGCAAAGGTCAGAGGAGCCAAAGCGCAGGGTGGATACTTCAGTGTCTTGGGAGGCGTTGATTTGTGTCGGATCGTCCAAGAAGAGAGCGAGGAAGG	6	WT	VKSATLSSTESTASGMQDEVRAVGEEQRSEEPKRRVDTSVSWEALICVGSSKKRARKASSSDDEGGPRTLGGDGHRAEEASKDKE	VKSATLSSTESTASGMQDEVRAVGEEQRSEEPKRRVDTSVSWEALICVGSSKKRARKASSSDDEGGPRTLGGDGHRAEEASKDKE
CACGGCGTCTGGAATGCAGGATGAGGTCAGAGCGGTTGGCGAGGAGCAAAGGTCAGAGGAGCCAAAGCGCAGGGTGGATACTTCAGTGTCTTGGGAGGCGTTGATTTGTGTCGGATCGTCCAAGAAGAGAGCGAGGAAGG	CACGGCGTCTGGAATGCAGGATGAGGTCAGAGCGGTTGGCGAGGAGCAAAGGTTAGAGGAGCCAAAGCGCAGGGTGGATACTTCAGTGTCTTGGGAGGCGTTGATTTGTGTCGGATCGTCCAAGAAGAGAGCGAGGAAGG	6	WT	VKSATLSSTESTASGMQDEVRAVGEEQRSEEPKRRVDTSVSWEALICVGSSKKRARKASSSDDEGGPRTLGGDGHRAEEASKDKE	VKSATLSSTESTASGMQDEVRAVGEEQRSEEPKRRVDTSVSWEALICVGSSKKRARKASSSDDEGGPRTLGGDGHRAEEASKDKE
CACGGCGTCTGGAATGCAGGATGAGGTCAGAGCGGTTGGCGAGGAGCAAAGGTCAGAGGAGCCAAAGCGCAGGGTGGATACTTCAGTGTCTTGGGAGGCGTTGATTTGTGTCGGATCGTCCAAGAAGAGAGCGAGGAAGG	CACGGCGTCTGGAATGCAGGATGAGGTCAGAGCGGTTGGCGAGGAGCATAGGTCAGAGGAGCCAAAGCGCAGGGTGGATACTTCAGTGTCTTGGGAGGCGTTGATTTGTGTCGGATCGTCCAAGAAGAGAGCGAGGAAGG	6	WT	VKSATLSSTESTASGMQDEVRAVGEEQRSEEPKRRVDTSVSWEALICVGSSKKRARKASSSDDEGGPRTLGGDGHRAEEASKDKE	VKSATLSSTESTASGMQDEVRAVGEEQRSEEPKRRVDTSVSWEALICVGSSKKRARKASSSDDEGGPRTLGGDGHRAEEASKDKE
CACGGCGTCTGGAATGCAGGATGAGGTCAGAGCGGTTGGCGAGGAGCAAAGGTCAGAGGAGCCAAAGCGCAGGGTGGATACTTCAGTGTCTTGGGAGGCGTTGATTTGTGTCGGATCGTCCAAGAAGAGAGCGAGGAAGG	CACGGCGTCTGGAATGCAAGATGAGGTCAGAGCGGTTGGCGAGGAGCAAAGGTCAGAGGAGCCAAAGCGCAGGGTGGATACTTCAGTGTCTTGGGAGGCGTTGATTTGTGTCGGATCGTCCAAGAAGAGAGCGAGGAAGG	6	WT	VKSATLSSTESTASGMQDEVRAVGEEQRSEEPKRRVDTSVSWEALICVGSSKKRARKASSSDDEGGPRTLGGDGHRAEEASKDKE	VKSATLSSTESTASGMQDEVRAVGEEQRSEEPKRRVDTSVSWEALICVGSSKKRARKASSSDDEGGPRTLGGDGHRAEEASKDKE
CACGGCGTCTGGAATGCAGGATGAGGTCAGAGCGGTTGGCGAGGAGCAAAGGTCAGAGGAGCCAAAGCGCAGGGTGGATACTTCAGTGTCTTGGGAGGCGTTGATTTGTGTCGGATCGTCCAAGAAGAGAGCGAGGAAGG	CACGGCGTCTGGAATGCAGGATGAGGTCAGAGCGGTTGGCGAGGAGCAAAGGTCAGAGGAGCCAAAGCGCAGGGTGGATACTTCAGTGTCTTGGGAGGCGTTGATTTGTGTCGGATCCTCCAAGAAGAGAGCGAGGAAGG	6	WT	VKSATLSSTESTASGMQDEVRAVGEEQRSEEPKRRVDTSVSWEALICVGSSKKRARKASSSDDEGGPRTLGGDGHRAEEASKDKE	VKSATLSSTESTASGMQDEVRAVGEEQRSEEPKRRVDTSVSWEALICVGSSKKRARKASSSDDEGGPRTLGGDGHRAEEASKDKE
CACGGCGTCTGGAATGCAGGATGAGGTCAGAGCGGTTGGCGAGGAGCAAAGGTCAGAGGAGCCAAAGCGCAGGGTGGATACTTCAGTGTCTTGGGAGGCGTTGATTTGTGTCGGATCGTCCAAGAAGAGAGCGAGGAAGG	CACGGCGTCTGGAATGCAGGATGAGGTCAGAGCGGTTGGCGAGTAGCAAAGGTCAGAGGAGCCAAAGCGCAGGGTGGATACTTCAGTGTCTTGGGAGGCGTTGATTTGTGTCGGATCGTCCAAGAAGAGAGCGAGGAAGG	6	WT	VKSATLSSTESTASGMQDEVRAVGEEQRSEEPKRRVDTSVSWEALICVGSSKKRARKASSSDDEGGPRTLGGDGHRAEEASKDKE	VKSATLSSTESTASGMQDEVRAVGEEQRSEEPKRRVDTSVSWEALICVGSSKKRARKASSSDDEGGPRTLGGDGHRAEEASKDKE
CACGGCGTCTGGAATGCAGGATGAGGTCAGAGCGGTTGGCGAGGAGCAAAGGTCAGAGGAGCCAAAGCGCAGGGTGGATACTTCAGTGTCTTGGGAGGCGTTGATTTGTGTCGGATCGTCCAAGAAGAGAGCGAGGAAGG	CACGGCGTCTGGAATGCAGGATGAGGTCAGAGCGGTTGGCGAGGAGCAAAGGTCAGAGGAGCCAAAGCGCAGGGTGGATACTTCTGTGTCTTGGGAGGCGTTGATTTGTGTCGGATCGTCCAAGAAGAGAGCGAGGAAGG	6	WT	VKSATLSSTESTASGMQDEVRAVGEEQRSEEPKRRVDTSVSWEALICVGSSKKRARKASSSDDEGGPRTLGGDGHRAEEASKDKE	VKSATLSSTESTASGMQDEVRAVGEEQRSEEPKRRVDTSVSWEALICVGSSKKRARKASSSDDEGGPRTLGGDGHRAEEASKDKE
CACGGCGTCTGGAATGCAGGATGAGGTCAGAGCGGTTGGCGAGGAGCAAAGGTCAGAGGAGCCAAAGCGCAGGGTGGATACTTCAGTGTCTTGGGAGGCGTTGATTTGTGTCGGATCGTCCAAGAAGAGAGCGAGGAAGG	CTCGGCGTCTGGAATGCAGGATGAGGTCAGAGCGGTTGGCGAGGAGCAAAGGTCAGAGGAGCCAAAGCGCAGGGTGGATACTTCAGTGTCTTGGGAGGCGTTGATTTGTGTCGGATCGTCCAAGAAGAGAGCGAGGAAGG	6	WT	VKSATLSSTESTASGMQDEVRAVGEEQRSEEPKRRVDTSVSWEALICVGSSKKRARKASSSDDEGGPRTLGGDGHRAEEASKDKE	VKSATLSSTESTASGMQDEVRAVGEEQRSEEPKRRVDTSVSWEALICVGSSKKRARKASSSDDEGGPRTLGGDGHRAEEASKDKE
CACGGCGTCTGGAATGCAGGATGAGGTCAGAGCGGTTGGCGAGGAGCAAAGGTCAGAGGAGCCAAAGCGCAGGGTGGATACTTCAGTGTCTTGGGAGGCGTTGATTTGTGTCGGATCGTCCAAGAAGAGAGCGAGGAAGG	CACGGCGTCTGGAATGCAGGATGAGGTCAGAGCGGTTGGCGAGGAGCAAAGGTCAGAGGAGCCAAAGCGCAGGGTGGATACTTCAGTGTCTTGGGAGGCGTTGATTTGTGTCGGATCGTCCAAGAAGAGAGCGAGTAAGG	6	WT	VKSATLSSTESTASGMQDEVRAVGEEQRSEEPKRRVDTSVSWEALICVGSSKKRARKASSSDDEGGPRTLGGDGHRAEEASKDKE	VKSATLSSTESTASGMQDEVRAVGEEQRSEEPKRRVDTSVSWEALICVGSSKKRARKASSSDDEGGPRTLGGDGHRAEEASKDKE
CACGGCGTCTGGAATGCAGGATGAGGTCAGAGCGGTTGGCGAGGAGCAAAGGTCAGAGGAGCCAAAGCGCAGGGTGGATACTTCAGTGTCTTGGGAGGCGTTGATTTGTGTCGGATCGTCCAAGAAGAGAGCGAGGAAGG	CACGGCGTCTGGAATGCAGGATGAGGTCAGAGCGGTTGGCGAGGAGCAAAGGTCAGAGGAGCCAAAGCGCAGGGTGGATACTTCAGTGTCTTAGGAGGCGTTGATTTGTGTCGGATCGTCCAAGAAGAGAGCGAGGAAGG	6	WT	VKSATLSSTESTASGMQDEVRAVGEEQRSEEPKRRVDTSVSWEALICVGSSKKRARKASSSDDEGGPRTLGGDGHRAEEASKDKE	VKSATLSSTESTASGMQDEVRAVGEEQRSEEPKRRVDTSVSWEALICVGSSKKRARKASSSDDEGGPRTLGGDGHRAEEASKDKE
CACGGCGTCTGGAATGCAGGATGAGGTCAGAGCGGTTGGCGAGGAGCAAAGGTCAGAGGAGCCAAAGCGCAGGGTGGATACTTCAGTGTCTTGGGAGGCGTTGATTTGTGTCGGATCGTCCAAGAAGAGAGCGAGGAAGG	CACGGCGTCTGGAATGCAGGATGAGGTCAGAGCGGTTGGCGAGGAGCAAAGGTCAGAGGAGCCAAAGCGCAGGGTGGATACTTCAATGTCTTGGGAGGCGTTGATTTGTGTCGGATCGTCCAAGAAGAGAGCGAGGAAGG	6	WT	VKSATLSSTESTASGMQDEVRAVGEEQRSEEPKRRVDTSVSWEALICVGSSKKRARKASSSDDEGGPRTLGGDGHRAEEASKDKE	VKSATLSSTESTASGMQDEVRAVGEEQRSEEPKRRVDTSVSWEALICVGSSKKRARKASSSDDEGGPRTLGGDGHRAEEASKDKE
CACGGCGTCTGGAATGCAGGATGAGGTCAGAGCGGTTGGCGAGGAGCAAAGGTCAGAGGAGCCAAAGCGCAGGGTGGATACTTCAGTGTCTTGGGAGGCGTTGATTTGTGTCGGATCGTCCAAGAAGAGAGCGAGGAAGG	CACGGCGTCTGGAATGCAGGATGAGGTCAGAGCGGTTGTCGAGGAGCAAAGGTCAGAGGAGCCAAAGCGCAGGGTGGATACTTCAGTGTCTTGGGAGGCGTTGATTTGTGTCGGATCGTCCAAGAAGAGAGCGAGGAAGG	5	WT	VKSATLSSTESTASGMQDEVRAVGEEQRSEEPKRRVDTSVSWEALICVGSSKKRARKASSSDDEGGPRTLGGDGHRAEEASKDKE	VKSATLSSTESTASGMQDEVRAVGEEQRSEEPKRRVDTSVSWEALICVGSSKKRARKASSSDDEGGPRTLGGDGHRAEEASKDKE
CACGGCGTCTGGAATGCAGGATGAGGTCAGAGCGGTTGGCGAGGAGCAAAGGTCAGAGGAGCCAAAGCGCAGGGTGGATACTTCAGTGTCTTGGGAGGCGTTGATTTGTGTCGGATCGTCCAAGAAGAGAGCGAGGAAGG	CACGGCGTCTGGAATGCAGGATGAGGTCAGAGCGGTTGGCGAGGAGCAAAGGTCAGATGAGCCAAAGCGCAGGGTGGATACTTCAGTGTCTTGGGAGGCGTTGATTTGTGTCGGATCGTCCAAGAAGAGAGCGAGGAAGG	5	WT	VKSATLSSTESTASGMQDEVRAVGEEQRSEEPKRRVDTSVSWEALICVGSSKKRARKASSSDDEGGPRTLGGDGHRAEEASKDKE	VKSATLSSTESTASGMQDEVRAVGEEQRSEEPKRRVDTSVSWEALICVGSSKKRARKASSSDDEGGPRTLGGDGHRAEEASKDKE
CACGGCGTCTGGAATGCAGGATGAGGTCAGAGCGGTTGGCGAGGAGCAAAGGTCAGAGGAGCCAAAGCGCAGGGTGGATACTTCAGTGTCTTGGGAGGCGTTGATTTGTGTCGGATCGTCCAAGAAGAGAGCGAGGAAGG	CACGGCGTCTGGAATGCAGGATTAGGTCAGAGCGGTTGGCGAGGAGCAAAGGTCAGAGGAGCCAAAGCGCAGGGTGGATACTTCAGTGTCTTGGGAGGCGTTGATTTGTGTCGGATCGTCCAAGAAGAGAGCGAGGAAGG	5	WT	VKSATLSSTESTASGMQDEVRAVGEEQRSEEPKRRVDTSVSWEALICVGSSKKRARKASSSDDEGGPRTLGGDGHRAEEASKDKE	VKSATLSSTESTASGMQDEVRAVGEEQRSEEPKRRVDTSVSWEALICVGSSKKRARKASSSDDEGGPRTLGGDGHRAEEASKDKE
CACGGCGTCTGGAATGCAGGATGAGGTCAGAGCGGTTGGCGAGGAGCAAAGGTCAGAGGAGCCAAAGCGCAGGGTGGATACTTCAGTGTCTTGGGAGGCGTTGATTTGTGTCGGATCGTCCAAGAAGAGAGCGAGGAAGG	CACGGCGTCTGGAATGCAGGATGAGGTCAGAGCGGTTGGCGAGGAGCAACGGTCAGAGGAGCCAAAGCGCAGGGTGGATACTTCAGTGTCTTGGGAGGCGTTGATTTGTGTCGGATCGTCCAAGAAGAGAGCGAGGAAGG	5	WT	VKSATLSSTESTASGMQDEVRAVGEEQRSEEPKRRVDTSVSWEALICVGSSKKRARKASSSDDEGGPRTLGGDGHRAEEASKDKE	VKSATLSSTESTASGMQDEVRAVGEEQRSEEPKRRVDTSVSWEALICVGSSKKRARKASSSDDEGGPRTLGGDGHRAEEASKDKE
CACGGCGTCTGGAATGCAGGATGAGGTCAGAGCGGTTGGCGAGGAGCAAAGGTCAGAGGAGCCAAAGCGCAGGGTGGATACTTCAGTGTCTTGGGAGGCGTTGATTTGTGTCGGATCGTCCAAGAAGAGAGCGAGGAAGG	CACGGCGTCTGGAATGCAGGATGAGGTCAGAGCGGTTGGCGAGGAGCAAAGGTCAGAGGAGCCAAAGAGCAGGGTGGATACTTCAGTGTCTTGGGAGGCGTTGATTTGTGTCGGATCGTCCAAGAAGAGAGCGAGGAAGG	5	WT	VKSATLSSTESTASGMQDEVRAVGEEQRSEEPKRRVDTSVSWEALICVGSSKKRARKASSSDDEGGPRTLGGDGHRAEEASKDKE	VKSATLSSTESTASGMQDEVRAVGEEQRSEEPKRRVDTSVSWEALICVGSSKKRARKASSSDDEGGPRTLGGDGHRAEEASKDKE
CACGGCGTCTGGAATGCAGGATGAGGTCAGAGCGGTTGGCGAGGAGCAAAGGTCAGAGGAGCCAAAGCGCAGGGTGGATACTTCAGTGTCTTGGGAGGCGTTGATTTGTGTCGGATCGTCCAAGAAGAGAGCGAGGAAGG	CACGGCGTCTGGAATGCAGGATGAGGTCAGAGCGGTTGGCGAGGAGCAAAGGTCAGAGGAGCCAAAGCGCAGGGTGGATACTTCAGTGTCTAGGGAGGCGTTGATTTGTGTCGGATCGTCCAAGAAGAGAGCGAGGAAGG	5	WT	VKSATLSSTESTASGMQDEVRAVGEEQRSEEPKRRVDTSVSWEALICVGSSKKRARKASSSDDEGGPRTLGGDGHRAEEASKDKE	VKSATLSSTESTASGMQDEVRAVGEEQRSEEPKRRVDTSVSWEALICVGSSKKRARKASSSDDEGGPRTLGGDGHRAEEASKDKE
CACGGCGTCTGGAATGCAGGATGAGGTCAGAGCGGTTGGCGAGGAGCAAAGGTCAGAGGAGCCAAAGCGCAGGGTGGATACTTCAGTGTCTTGGGAGGCGTTGATTTGTGTCGGATCGTCCAAGAAGAGAGCGAGGAAGG	CACGGCGTCTGGAATGCAGGATGAGGTCAGAGCGGTTGGCGAGGAGCAAAGGTCAGAGGAGCCAAAGCGCAGGGTGGATACTTCAGTGTCTTGGGAGGCGTTGATTTGTGTCGGATCGTCCAAGAAGAGAGCGAGGAATG	5	WT	VKSATLSSTESTASGMQDEVRAVGEEQRSEEPKRRVDTSVSWEALICVGSSKKRARKASSSDDEGGPRTLGGDGHRAEEASKDKE	VKSATLSSTESTASGMQDEVRAVGEEQRSEEPKRRVDTSVSWEALICVGSSKKRARKASSSDDEGGPRTLGGDGHRAEEASKDKE
CACGGCGTCTGGAATGCAGGATGAGGTCAGAGCGGTTGGCGAGGAGCAAAGGTCAGAGGAGCCAAAGCGCAGGGTGGATACTTCAGTGTCTTGGGAGGCGTTGATTTGTGTCGGATCGTCCAAGAAGAGAGCGAGGAAGG	CACGGCGTCTGGAATGCAGGATGAGGTCAGAGCGGTTGGCGAGGAGCAAAGGTCAGAGGAGCCAAAGCGCAGGTTGGATACTTCAGTGTCTTGGGAGGCGTTGATTTGTGTCGGATCGTCCAAGAAGAGAGCGAGGAAGG	5	WT	VKSATLSSTESTASGMQDEVRAVGEEQRSEEPKRRVDTSVSWEALICVGSSKKRARKASSSDDEGGPRTLGGDGHRAEEASKDKE	VKSATLSSTESTASGMQDEVRAVGEEQRSEEPKRRVDTSVSWEALICVGSSKKRARKASSSDDEGGPRTLGGDGHRAEEASKDKE
CACGGCGTCTGGAATGCAGGATGAGGTCAGAGCGGTTGGCGAGGAGCAAAGGTCAGAGGAGCCAAAGCGCAGGGTGGATACTTCAGTGTCTTGGGAGGCGTTGATTTGTGTCGGATCGTCCAAGAAGAGAGCGAGGAAGG	CACGGCGTCTGGAATGCAGGATGAGGTCAGAGCGGTTGGCGAGGAGCAAAGTTCAGAGGAGCCAAAGCGCAGGGTGGATACTTCAGTGTCTTGGGAGGCGTTGATTTGTGTCGGATCGTCCAAGAAGAGAGCGAGGAAGG	5	WT	VKSATLSSTESTASGMQDEVRAVGEEQRSEEPKRRVDTSVSWEALICVGSSKKRARKASSSDDEGGPRTLGGDGHRAEEASKDKE	VKSATLSSTESTASGMQDEVRAVGEEQRSEEPKRRVDTSVSWEALICVGSSKKRARKASSSDDEGGPRTLGGDGHRAEEASKDKE
CACGGCGTCTGGAATGCAGGATGAGGTCAGAGCGGTTGGCGAGGAGCAAAGGTCAGAGGAGCCAAAGCGCAGGGTGGATACTTCAGTGTCTTGGGAGGCGTTGATTTGTGTCGGATCGTCCAAGAAGAGAGCGAGGAAGG	CACGGCGTCTGGAATGCAGGATGAGGTCAGAGCGGTTGGCGAGGAGCAAAGGTCAGAGGAGCCTAAGCGCAGGGTGGATACTTCAGTGTCTTGGGAGGCGTTGATTTGTGTCGGATCGTCCAAGAAGAGAGCGAGGAAGG	5	WT	VKSATLSSTESTASGMQDEVRAVGEEQRSEEPKRRVDTSVSWEALICVGSSKKRARKASSSDDEGGPRTLGGDGHRAEEASKDKE	VKSATLSSTESTASGMQDEVRAVGEEQRSEEPKRRVDTSVSWEALICVGSSKKRARKASSSDDEGGPRTLGGDGHRAEEASKDKE
CACGGCGTCTGGAATGCAGGATGAGGTCAGAGCGGTTGGCGAGGAGCAAAGGTCAGAGGAGCCAAAGCGCAGGGTGGATACTTCAGTGTCTTGGGAGGCGTTGATTTGTGTCGGATCGTCCAAGAAGAGAGCGAGGAAGG	CACGGCGTCTGGAATGCAGGATGAGGTCAGAGCGGTTGGCGAGGAGCAAAGGTCAGAGGAGCCAAAGCGCAGGGTGGATACTTCAGTGTCTTGGGAGGCGTTGTTTTGTGTCGGATCGTCCAAGAAGAGAGCGAGGAAGG	5	WT	VKSATLSSTESTASGMQDEVRAVGEEQRSEEPKRRVDTSVSWEALICVGSSKKRARKASSSDDEGGPRTLGGDGHRAEEASKDKE	VKSATLSSTESTASGMQDEVRAVGEEQRSEEPKRRVDTSVSWEALICVGSSKKRARKASSSDDEGGPRTLGGDGHRAEEASKDKE
CACGGCGTCTGGAATGCAGGATGAGGTCAGAGCGGTTGGCGAGGAGCAAAGGTCAGAGGAGCCAAAGCGCAGGGTGGATACTTCAGTGTCTTGGGAGGCGTTGATTTGTGTCGGATCGTCCAAGAAGAGAGCGAGGAAGG	CACGGAGTCTGGAATGCAGGATGAGGTCAGAGCGGTTGGCGAGGAGCAAAGGTCAGAGGAGCCAAAGCGCAGGGTGGATACTTCAGTGTCTTGGGAGGCGTTGATTTGTGTCGGATCGTCCAAGAAGAGAGCGAGGAAGG	5	WT	VKSATLSSTESTASGMQDEVRAVGEEQRSEEPKRRVDTSVSWEALICVGSSKKRARKASSSDDEGGPRTLGGDGHRAEEASKDKE	VKSATLSSTESTASGMQDEVRAVGEEQRSEEPKRRVDTSVSWEALICVGSSKKRARKASSSDDEGGPRTLGGDGHRAEEASKDKE
CACGGCGTCTGGAATGCAGGATGAGGTCAGAGCGGTTGGCGAGGAGCAAAGGTCAGAGGAGCCAAAGCGCAGGGTGGATACTTCAGTGTCTTGGGAGGCGTTGATTTGTGTCGGATCGTCCAAGAAGAGAGCGAGGAAGG	CACGGCGTCTGGAATGCAGGATGAGGTCAGAGCGGTTGGCGAGGAGCAAAGGTCATAGGAGCCAAAGCGCAGGGTGGATACTTCAGTGTCTTGGGAGGCGTTGATTTGTGTCGGATCGTCCAAGAAGAGAGCGAGGAAGG	5	WT	VKSATLSSTESTASGMQDEVRAVGEEQRSEEPKRRVDTSVSWEALICVGSSKKRARKASSSDDEGGPRTLGGDGHRAEEASKDKE	VKSATLSSTESTASGMQDEVRAVGEEQRSEEPKRRVDTSVSWEALICVGSSKKRARKASSSDDEGGPRTLGGDGHRAEEASKDKE
CACGGCGTCTGGAATGCAGGATGAGGTCAGAGCGGTTGGCGAGGAGCAAAGGTCAGAGGAGCCAAAGCGCAGGGTGGATACTTCAGTGTCTTGGGAGGCGTTGATTTGTGTCGGATCGTCCAAGAAGAGAGCGAGGAAGG	CACGGCGTCTGGAATGCAGGATGAGGTCAGAGCGGTTGGCGAGGAGCAAAGGTCAGAGGAGCCAAAGCGCAGGGTGGATACTTCAGTGTCTTGGGAGTCGTTGATTTGTGTCGGATCGTCCAAGAAGAGAGCGAGGAAGG	5	WT	VKSATLSSTESTASGMQDEVRAVGEEQRSEEPKRRVDTSVSWEALICVGSSKKRARKASSSDDEGGPRTLGGDGHRAEEASKDKE	VKSATLSSTESTASGMQDEVRAVGEEQRSEEPKRRVDTSVSWEALICVGSSKKRARKASSSDDEGGPRTLGGDGHRAEEASKDKE
CACGGCGTCTGGAATGCAGGATGAGGTCAGAGCGGTTGGCGAGGAGCAAAGGTCAGAGGAGCCAAAGCGCAGGGTGGATACTTCAGTGTCTTGGGAGGCGTTGATTTGTGTCGGATCGTCCAAGAAGAGAGCGAGGAAGG	CACGGCGTCTGGAATGCAGGATGAGGTCAGAGCGGTTGGCGAGGAGCAAAGGTCAGAGGAGCCAAAGCGCAGGGTGGAGACTTCAGTGTCTTGGGAGGCGTTGATTTGTGTCGGATCGTCCAAGAAGAGAGCGAGGAAGG	5	WT	VKSATLSSTESTASGMQDEVRAVGEEQRSEEPKRRVDTSVSWEALICVGSSKKRARKASSSDDEGGPRTLGGDGHRAEEASKDKE	VKSATLSSTESTASGMQDEVRAVGEEQRSEEPKRRVDTSVSWEALICVGSSKKRARKASSSDDEGGPRTLGGDGHRAEEASKDKE
CACGGCGTCTGGAATGCAGGATGAGGTCAGAGCGGTTGGCGAGGAGCAAAGGTCAGAGGAGCCAAAGCGCAGGGTGGATACTTCAGTGTCTTGGGAGGCGTTGATTTGTGTCGGATCGTCCAAGAAGAGAGCGAGGAAGG	CACGGCGTCTGGAATGCAGGATGAGGTCAGAGCGGTTGGCGAGGAGCAAAGGTCAGAGGAGCCAAAGCGCAGGGTGGATACTTCAGTGTCTTGTGAGGCGTTGATTTGTGTCGGATCGTCCAAGAAGAGAGCGAGGAAGG	5	WT	VKSATLSSTESTASGMQDEVRAVGEEQRSEEPKRRVDTSVSWEALICVGSSKKRARKASSSDDEGGPRTLGGDGHRAEEASKDKE	VKSATLSSTESTASGMQDEVRAVGEEQRSEEPKRRVDTSVSWEALICVGSSKKRARKASSSDDEGGPRTLGGDGHRAEEASKDKE
CACGGCGTCTGGAATGCAGGATGAGGTCAGAGCGGTTGGCGAGGAGCAAAGGTCAGAGGAGCCAAAGCGCAGGGTGGATACTTCAGTGTCTTGGGAGGCGTTGATTTGTGTCGGATCGTCCAAGAAGAGAGCGAGGAAGG	CACGGCGTCTGGAATGCAGGATGAGGTCAGAGTGGTTGGCGAGGAGCAAAGGTCAGAGGAGCCAAAGCGCAGGGTGGATACTTCAGTGTCTTGGGAGGCGTTGATTTGTGTCGGATCGTCCAAGAAGAGAGCGAGGAAGG	5	WT	VKSATLSSTESTASGMQDEVRAVGEEQRSEEPKRRVDTSVSWEALICVGSSKKRARKASSSDDEGGPRTLGGDGHRAEEASKDKE	VKSATLSSTESTASGMQDEVRAVGEEQRSEEPKRRVDTSVSWEALICVGSSKKRARKASSSDDEGGPRTLGGDGHRAEEASKDKE
CACGGCGTCTGGAATGCAGGATGAGGTCAGAGCGGTTGGCGAGGAGCAAAGGTCAGAGGAGCCAAAGCGCAGGGTGGATACTTCAGTGTCTTGGGAGGCGTTGATTTGTGTCGGATCGTCCAAGAAGAGAGCGAGGAAGG	CACGGCGTCTGGAATGCAGGATGAGGTCAGAGCGGTTGGCGAGGAGCAAAGGTCAGAGGAGCCAAAGCGCAGGGTGGATACTTCAGTTTCTTGGGAGGCGTTGATTTGTGTCGGATCGTCCAAGAAGAGAGCGAGGAAGG	5	WT	VKSATLSSTESTASGMQDEVRAVGEEQRSEEPKRRVDTSVSWEALICVGSSKKRARKASSSDDEGGPRTLGGDGHRAEEASKDKE	VKSATLSSTESTASGMQDEVRAVGEEQRSEEPKRRVDTSVSWEALICVGSSKKRARKASSSDDEGGPRTLGGDGHRAEEASKDKE
CACGGCGTCTGGAATGCAGGATGAGGTCAGAGCGGTTGGCGAGGAGCAAAGGTCAGAGGAGCCAAAGCGCAGGGTGGATACTTCAGTGTCTTGGGAGGCGTTGATTTGTGTCGGATCGTCCAAGAAGAGAGCGAGGAAGG	CACGGCGTCTGGAATGCAGGATGAGGTCAGAGCGGTTGGCGAGGAGCAAAGGTCAGAGGAGCCAAAGCTCAGGGTGGATACTTCAGTGTCTTGGGAGGCGTTGATTTGTGTCGGATCGTCCAAGAAGAGAGCGAGGAAGG	5	WT	VKSATLSSTESTASGMQDEVRAVGEEQRSEEPKRRVDTSVSWEALICVGSSKKRARKASSSDDEGGPRTLGGDGHRAEEASKDKE	VKSATLSSTESTASGMQDEVRAVGEEQRSEEPKRRVDTSVSWEALICVGSSKKRARKASSSDDEGGPRTLGGDGHRAEEASKDKE
CACGGCGTCTGGAATGCAGGATGAGGTCAGAGCGGTTGGCGAGGAGCAAAGGTCAGAGGAGCCAAAGCGCAGGGTGGATACTTCAGTGTCTTGGGAGGCGTTGATTTGTGTCGGATCGTCCAAGAAGAGAGCGAGGAAGG	CACGGCGTCTGGAATGCAGGATGAGGTCAGAGCGGTTGGCGAGGAGCAAAGGTCAGAGGAGCCAAAGCGCAGGGTGGATACTTCAGTGTCTTGGGAGGCGTTGATTTGTGTCGGATCGTCCAAGAAGAGTGCGAGGAAGG	5	WT	VKSATLSSTESTASGMQDEVRAVGEEQRSEEPKRRVDTSVSWEALICVGSSKKRARKASSSDDEGGPRTLGGDGHRAEEASKDKE	VKSATLSSTESTASGMQDEVRAVGEEQRSEEPKRRVDTSVSWEALICVGSSKKRARKASSSDDEGGPRTLGGDGHRAEEASKDKE
CACGGCGTCTGGAATGCAGGATGAGGTCAGAGCGGTTGGCGAGGAGCAAAGGTCAGAGGAGCCAAAGCGCAGGGTGGATACTTCAGTGTCTTGGGAGGCGTTGATTTGTGTCGGATCGTCCAAGAAGAGAGCGAGGAAGG	CACGGCGTCTGGAATGCAGGATGAGGTCAGAGCGGTTGGCGAGGAGCAAAGGTCAGAGGAGCCAAAGCGCAGGGTGGATACTTCAGTGTCTTGGGAGGCGTTGATTTGTGTCGGATCGTCCAAGAAGAGAGCGAGGAAAG	5	WT	VKSATLSSTESTASGMQDEVRAVGEEQRSEEPKRRVDTSVSWEALICVGSSKKRARKASSSDDEGGPRTLGGDGHRAEEASKDKE	VKSATLSSTESTASGMQDEVRAVGEEQRSEEPKRRVDTSVSWEALICVGSSKKRARKASSSDDEGGPRTLGGDGHRAEEASKDKE
CACGGCGTCTGGAATGCAGGATGAGGTCAGAGCGGTTGGCGAGGAGCAAAGGTCAGAGGAGCCAAAGCGCAGGGTGGATACTTCAGTGTCTTGGGAGGCGTTGATTTGTGTCGGATCGTCCAAGAAGAGAGCGAGGAAGG	CACGGCGTCTGGAATGCAGGATGAGGTCAGAGCGGTTGGCGAGGAGCAAAGGTCAGAGGAGCCAAAGCGCAGGGTGGATACTTCAGTATCTTGGGAGGCGTTGATTTGTGTCGGATCGTCCAAGAAGAGAGCGAGGAAGG	5	WT	VKSATLSSTESTASGMQDEVRAVGEEQRSEEPKRRVDTSVSWEALICVGSSKKRARKASSSDDEGGPRTLGGDGHRAEEASKDKE	VKSATLSSTESTASGMQDEVRAVGEEQRSEEPKRRVDTSVSWEALICVGSSKKRARKASSSDDEGGPRTLGGDGHRAEEASKDKE
CACGGCGTCTGGAATGCAGGATGAGGTCAGAGCGGTTGGCGAGGAGCAAAGGTCAGAGGAGCCAAAGCGCAGGGTGGATACTTCAGTGTCTTGGGAGGCGTTGATTTGTGTCGGATCGTCCAAGAAGAGAGCGAGGAAGG	CACGTCGTCTGGAATGCAGGATGAGGTCAGAGCGGTTGGCGAGGAGCAAAGGTCAGAGGAGCCAAAGCGCAGGGTGGATACTTCAGTGTCTTGGGAGGCGTTGATTTGTGTCGGATCGTCCAAGAAGAGAGCGAGGAAGG	5	WT	VKSATLSSTESTASGMQDEVRAVGEEQRSEEPKRRVDTSVSWEALICVGSSKKRARKASSSDDEGGPRTLGGDGHRAEEASKDKE	VKSATLSSTESTASGMQDEVRAVGEEQRSEEPKRRVDTSVSWEALICVGSSKKRARKASSSDDEGGPRTLGGDGHRAEEASKDKE
CACGGCGTCTGGAATGCAGGATGAGGTCAGAGCGGTTGGCGAGGAGCAAAGGTCAGAGGAGCCAAAGCGCAGGGTGGATACTTCAGTGTCTTGGGAGGCGTTGATTTGTGTCGGATCGTCCAAGAAGAGAGCGAGGAAGG	CACGGCGTCTGGAATGCAGGATGAGGTCAGAGCGGTTGGCTAGGAGCAAAGGTCAGAGGAGCCAAAGCGCAGGGTGGATACTTCAGTGTCTTGGGAGGCGTTGATTTGTGTCGGATCGTCCAAGAAGAGAGCGAGGAAGG	5	WT	VKSATLSSTESTASGMQDEVRAVGEEQRSEEPKRRVDTSVSWEALICVGSSKKRARKASSSDDEGGPRTLGGDGHRAEEASKDKE	VKSATLSSTESTASGMQDEVRAVGEEQRSEEPKRRVDTSVSWEALICVGSSKKRARKASSSDDEGGPRTLGGDGHRAEEASKDKE
CACGGCGTCTGGAATGCAGGATGAGGTCAGAGCGGTTGGCGAGGAGCAAAGGTCAGAGGAGCCAAAGCGCAGGGTGGATACTTCAGTGTCTTGGGAGGCGTTGATTTGTGTCGGATCGTCCAAGAAGAGAGCGAGGAAGG	CACGGCGTCTGGAATGCAGGATGAGGTCATAGCGGTTGGCGAGGAGCAAAGGTCAGAGGAGCCAAAGCGCAGGGTGGATACTTCAGTGTCTTGGGAGGCGTTGATTTGTGTCGGATCGTCCAAGAAGAGAGCGAGGAAGG	5	WT	VKSATLSSTESTASGMQDEVRAVGEEQRSEEPKRRVDTSVSWEALICVGSSKKRARKASSSDDEGGPRTLGGDGHRAEEASKDKE	VKSATLSSTESTASGMQDEVRAVGEEQRSEEPKRRVDTSVSWEALICVGSSKKRARKASSSDDEGGPRTLGGDGHRAEEASKDKE
CACGGCGTCTGGAATGCAGGATGAGGTCAGAGCGGTTGGCGAGGAGCAAAGGTCAGAGGAGCCAAAGCGCAGGGTGGATACTTCAGTGTCTTGGGAGGCGTTGATTTGTGTCGGATCGTCCAAGAAGAGAGCGAGGAAGG	CACGGCGTCTGTAATGCAGGATGAGGTCAGAGCGGTTGGCGAGGAGCAAAGGTCAGAGGAGCCAAAGCGCAGGGTGGATACTTCAGTGTCTTGGGAGGCGTTGATTTGTGTCGGATCGTCCAAGAAGAGAGCGAGGAAGG	5	WT	VKSATLSSTESTASGMQDEVRAVGEEQRSEEPKRRVDTSVSWEALICVGSSKKRARKASSSDDEGGPRTLGGDGHRAEEASKDKE	VKSATLSSTESTASGMQDEVRAVGEEQRSEEPKRRVDTSVSWEALICVGSSKKRARKASSSDDEGGPRTLGGDGHRAEEASKDKE
CACGGCGTCTGGAATGCAGGATGAGGTCAGAGCGGTTGGCGAGGAGCAAAGGTCAGAGGAGCCAAAGCGCAGGGTGGATACTTCAGTGTCTTGGGAGGCGTTGATTTGTGTCGGATCGTCCAAGAAGAGAGCGAGGAAGG	CACGGCGTCTGGAATGCAGGATGAGGTCAGAGCGGTTGGCGAGGAGCAAAGGTCAGAGGAGCCAAAGCGCAGGGTGGATACTACAGTGTCTTGGGAGGCGTTGATTTGTGTCGGATCGTCCAAGAAGAGAGCGAGGAAGG	5	WT	VKSATLSSTESTASGMQDEVRAVGEEQRSEEPKRRVDTSVSWEALICVGSSKKRARKASSSDDEGGPRTLGGDGHRAEEASKDKE	VKSATLSSTESTASGMQDEVRAVGEEQRSEEPKRRVDTSVSWEALICVGSSKKRARKASSSDDEGGPRTLGGDGHRAEEASKDKE
CACGGCGTCTGGAATGCAGGATGAGGTCAGAGCGGTTGGCGAGGAGCAAAGGTCAGAGGAGCCAAAGCGCAGGGTGGATACTTCAGTGTCTTGGGAGGCGTTGATTTGTGTCGGATCGTCCAAGAAGAGAGCGAGGAAGG	CACGGCGTCTGGAATGCTGGATGAGGTCAGAGCGGTTGGCGAGGAGCAAAGGTCAGAGGAGCCAAAGCGCAGGGTGGATACTTCAGTGTCTTGGGAGGCGTTGATTTGTGTCGGATCGTCCAAGAAGAGAGCGAGGAAGG	5	WT	VKSATLSSTESTASGMQDEVRAVGEEQRSEEPKRRVDTSVSWEALICVGSSKKRARKASSSDDEGGPRTLGGDGHRAEEASKDKE	VKSATLSSTESTASGMQDEVRAVGEEQRSEEPKRRVDTSVSWEALICVGSSKKRARKASSSDDEGGPRTLGGDGHRAEEASKDKE
[truncated: 147 more rows]

## Sheet: A5-ccl4+CR-PMUT
Reference	Target sequence	Read count	Type	TargetAA	ReferenceAA
[truncated: 315 more rows]

[truncated: 2 more sheets: A6- ccl+CR-PMUT, A7 PMUT-hepatocytes]
