# Supplementary material for: Targeting A-kinase anchoring protein 12 phosphorylation in hepatic stellate cells regulates liver injury and fibrosis in mouse models
Source: eLife. 2022 Oct 4;11:e78430. doi: 10.7554/eLife.78430 (PMC9531947; doi:10.7554/eLife.78430)
Supplement: Supplementary file 4. — Total protein from the liver or HSCs of AKAP12 PDEL CRISPR +GFAP-Cas9 mice was subjected to mass spectrometry-based proteomics analysis as described under methods. Proteomics dataset of whole liver, ER stress/UPR components of the liver and HSCs is shown. The summary tab in the excel explains each dataset. [file elife-78430-supp4.xlsx]

## Sheet: SUMMARY
	1. Proteomics liver: Total protein from livers of Oil+EV, Oil+CR, CCl4+EV or CCL4+CR were submitted for proteomics analysis as described under Materials and Methods.
	2. ER stress UPR liver: The ER stress and UPR components from the dataset in '1' above are shown separately
	3. Proteomics HSC: Total protein from HSCs isolated from Oil+EV, Oil+CR, CCl4+Ev, CCl4+CR were submitted for proteomics analysis as described under Materials and Methods

## Sheet: 1. Proteomics liver
Accession	Gene	Short-Name	Function [CC]	Subcellular location [CC]	Gene ontology (biological process)	Gene ontology (cellular component)	Gene ontology (GO)	Gene ontology (molecular function)	Gene ontology IDs	Description	ΣCoverage	Σ# Proteins	Σ# Unique Peptides	Σ# Peptides	Σ# PSMs	5-Cell: Area	6-Cell: Area	7-Cell: Area	8-Cell: Area	Oil+EV 1-PSM	OIL+CR-1 PSM	CCl4+EV-1 PSM	CCL4+CR-1 PSM	Oil+EV 2-PSM	OIL+CR-2 PSM	CCl4+EV-2 PSM	CCL4+CR-2 PSM	# AAs	MW [kDa]	calc. pI
Q8C196	CPSM	Carbamoyl-phosphate synthase [ammonia], mitochondrial	FUNCTION: Involved in the urea cycle of ureotelic animals where the enzyme plays an important role in removing excess ammonia from the cell. {ECO:0000269|PubMed:24703693}.	SUBCELLULAR LOCATION: Mitochondrion {ECO:0000250|UniProtKB:P31327}. Nucleus, nucleolus {ECO:0000250|UniProtKB:P31327}.	de novo' pyrimidine nucleobase biosynthetic process [GO:0006207]; anion homeostasis [GO:0055081]; carbamoyl phosphate biosynthetic process [GO:0070409]; cellular response to ammonia [GO:1903718]; cellular response to cAMP [GO:0071320]; cellular response to fibroblast growth factor stimulus [GO:0044344]; cellular response to glucagon stimulus [GO:0071377]; cellular response to oleic acid [GO:00714…	cytoplasm [GO:0005737]; mitochondrial inner membrane [GO:0005743]; mitochondrial nucleoid [GO:0042645]; mitochondrion [GO:0005739]; nucleolus [GO:0005730]; protein-containing complex [GO:0032991]	cytoplasm [GO:0005737]; mitochondrial inner membrane [GO:0005743]; mitochondrial nucleoid [GO:0042645]; mitochondrion [GO:0005739]; nucleolus [GO:0005730]; protein-containing complex [GO:0032991]; ATP binding [GO:0005524]; calcium ion binding [GO:0005509]; carbamoyl-phosphate synthase (ammonia) activity [GO:0004087]; carbamoyl-phosphate synthase (glutamine-hydrolyzing) activity [GO:0004088]; endo…	ATP binding [GO:0005524]; calcium ion binding [GO:0005509]; carbamoyl-phosphate synthase (ammonia) activity [GO:0004087]; carbamoyl-phosphate synthase (glutamine-hydrolyzing) activity [GO:0004088]; endopeptidase activity [GO:0004175]; glutamate binding [GO:0016595]; modified amino acid binding [GO:0072341]; phospholipid binding [GO:0005543]; protein-containing complex binding [GO:0044877]	GO:0000050; GO:0004087; GO:0004088; GO:0004175; GO:0005509; GO:0005524; GO:0005543; GO:0005730; GO:0005737; GO:0005739; GO:0005743; GO:0006207; GO:0006541; GO:0006807; GO:0007494; GO:0010043; GO:0014075; GO:0016595; GO:0019433; GO:0032094; GO:0032496; GO:0032991; GO:0042311; GO:0042594; GO:0042645; GO:0043200; GO:0044344; GO:0044877; GO:0046209; GO:0050667; GO:0055081; GO:0060416; GO:0070365; GO:…	RecName: Full=Carbamoyl-phosphate synthase [ammonia], mitochondrial; AltName: Full=Carbamoyl-phosphate synthetase I; Short=CPSase I; Flags: Precursor - [CPSM_MOUSE]	75.67	1	98	101	5053.12	10609618243	7.3582e+09	1.01008e+10	9.80256e+09	696	606	602	710	649	565	562	663	1500	164.514	6.91748
P07724	ALBU	Serum albumin	FUNCTION: Binds water, Ca(2+), Na(+), K(+), fatty acids, hormones, bilirubin and drugs. Its main function is the regulation of the colloidal osmotic pressure of blood. Major zinc transporter in plasma, typically binds about 80% of all plasma zinc (By similarity). Major calcium and magnesium transporter in plasma, binds approximately 45% of circulating calcium and magnesium in plasma (By similarit…	SUBCELLULAR LOCATION: Secreted.	cellular response to starvation [GO:0009267]; maintenance of mitochondrion location [GO:0051659]; negative regulation of apoptotic process [GO:0043066]; positive regulation of circadian sleep/wake cycle, non-REM sleep [GO:0046010]	basement membrane [GO:0005604]; cytoplasm [GO:0005737]; endoplasmic reticulum [GO:0005783]; extracellular exosome [GO:0070062]; extracellular region [GO:0005576]; extracellular space [GO:0005615]; Golgi apparatus [GO:0005794]; myelin sheath [GO:0043209]; protein-containing complex [GO:0032991]	basement membrane [GO:0005604]; cytoplasm [GO:0005737]; endoplasmic reticulum [GO:0005783]; extracellular exosome [GO:0070062]; extracellular region [GO:0005576]; extracellular space [GO:0005615]; Golgi apparatus [GO:0005794]; myelin sheath [GO:0043209]; protein-containing complex [GO:0032991]; chaperone binding [GO:0051087]; DNA binding [GO:0003677]; drug binding [GO:0008144]; enterobactin bindi…	chaperone binding [GO:0051087]; DNA binding [GO:0003677]; drug binding [GO:0008144]; enterobactin binding [GO:1903981]; enzyme binding [GO:0019899]; exogenous protein binding [GO:0140272]; fatty acid binding [GO:0005504]; identical protein binding [GO:0042802]; oxygen binding [GO:0019825]; pyridoxal phosphate binding [GO:0030170]; toxic substance binding [GO:0015643]; zinc ion binding [GO:0008270]	GO:0003677; GO:0005504; GO:0005576; GO:0005604; GO:0005615; GO:0005737; GO:0005783; GO:0005794; GO:0008144; GO:0008270; GO:0009267; GO:0015643; GO:0019825; GO:0019899; GO:0030170; GO:0032991; GO:0042802; GO:0043066; GO:0043209; GO:0046010; GO:0051087; GO:0051659; GO:0070062; GO:0140272; GO:1903981	RecName: Full=Albumin; Flags: Precursor - [ALBU_MOUSE]	74.34	1	39	39	1720.46	6.84639e+09	3.26419e+09	8.46662e+09	4.63216e+09	222	212	196	260	207	198	183	243	608	68.6477	6.07471
O35490	BHMT1	Betaine--homocysteine S-methyltransferase 1	FUNCTION: Involved in the regulation of homocysteine metabolism. Converts betaine and homocysteine to dimethylglycine and methionine, respectively. This reaction is also required for the irreversible oxidation of choline.	SUBCELLULAR LOCATION: Cytoplasm.	amino-acid betaine catabolic process [GO:0006579]; amino-acid betaine metabolic process [GO:0006577]; L-methionine salvage [GO:0071267]; methionine biosynthetic process [GO:0009086]; protein methylation [GO:0006479]	cytosol [GO:0005829]; extracellular exosome [GO:0070062]; protein-containing complex [GO:0032991]	cytosol [GO:0005829]; extracellular exosome [GO:0070062]; protein-containing complex [GO:0032991]; betaine-homocysteine S-methyltransferase activity [GO:0047150]; methyltransferase activity [GO:0008168]; protein-containing complex binding [GO:0044877]; zinc ion binding [GO:0008270]; amino-acid betaine catabolic process [GO:0006579]; amino-acid betaine metabolic process [GO:0006577]; L-methionine …	betaine-homocysteine S-methyltransferase activity [GO:0047150]; methyltransferase activity [GO:0008168]; protein-containing complex binding [GO:0044877]; zinc ion binding [GO:0008270]	GO:0005829; GO:0006479; GO:0006577; GO:0006579; GO:0008168; GO:0008270; GO:0009086; GO:0032991; GO:0044877; GO:0047150; GO:0070062; GO:0071267	RecName: Full=Betaine--homocysteine S-methyltransferase 1 - [BHMT1_MOUSE]	69.78	1	20	23	1221.72	6.364e+09	6.30462e+09	9.17351e+09	1.07047e+10	141	144	159	188	132	134	148	175	407	44.9919	7.89893
Q8BWT1	THIM	3-ketoacyl-CoA thiolase, mitochondrial	FUNCTION: In the production of energy from fats, this is one of the enzymes that catalyzes the last step of the mitochondrial beta-oxidation pathway, an aerobic process breaking down fatty acids into acetyl-CoA. Using free coenzyme A/CoA, catalyzes the thiolytic cleavage of medium- to long-chain unbranched 3-oxoacyl-CoAs into acetyl-CoA and a fatty acyl-CoA shortened by two carbon atoms. Also cat…	SUBCELLULAR LOCATION: Mitochondrion {ECO:0000250|UniProtKB:P42765}.	acetyl-CoA metabolic process [GO:0006084]; cellular response to hypoxia [GO:0071456]; fatty acid beta-oxidation [GO:0006635]; negative regulation of mitochondrial membrane permeability involved in apoptotic process [GO:1902109]; negative regulation of mitochondrial outer membrane permeabilization involved in apoptotic signaling pathway [GO:1901029]	mitochondrial inner membrane [GO:0005743]; mitochondrial matrix [GO:0005759]; mitochondrion [GO:0005739]	mitochondrial inner membrane [GO:0005743]; mitochondrial matrix [GO:0005759]; mitochondrion [GO:0005739]; acetyl-CoA C-acetyltransferase activity [GO:0003985]; acetyl-CoA C-acyltransferase activity [GO:0003988]; acetyl-CoA hydrolase activity [GO:0003986]; acyl-CoA hydrolase activity [GO:0047617]; myristoyl-CoA hydrolase activity [GO:0102991]; palmitoyl-CoA hydrolase activity [GO:0016290]; acetyl-…	acetyl-CoA C-acetyltransferase activity [GO:0003985]; acetyl-CoA C-acyltransferase activity [GO:0003988]; acetyl-CoA hydrolase activity [GO:0003986]; acyl-CoA hydrolase activity [GO:0047617]; myristoyl-CoA hydrolase activity [GO:0102991]; palmitoyl-CoA hydrolase activity [GO:0016290]	GO:0003985; GO:0003986; GO:0003988; GO:0005739; GO:0005743; GO:0005759; GO:0006084; GO:0006635; GO:0016290; GO:0047617; GO:0071456; GO:0102991; GO:1901029; GO:1902109	RecName: Full=3-ketoacyl-CoA thiolase, mitochondrial; AltName: Full=Acetyl-CoA acetyltransferase; AltName: Full=Acetyl-CoA acyltransferase; AltName: Full=Acyl-CoA hydrolase, mitochondrial; AltName: Full=Beta-ketothiolase; AltName: Full=Mitochondrial 3-oxoacyl-CoA thiolase - [THIM_MOUSE]	83.88	1	29	29	1401.5	5.41618e+09	2.82857e+09	3.48867e+09	2.94105e+09	200	180	160	185	187	168	149	173	397	41.8034	8.08936
P24270	CATA	Catalase	FUNCTION: Occurs in almost all aerobically respiring organisms and serves to protect cells from the toxic effects of hydrogen peroxide. Promotes growth of cells.	SUBCELLULAR LOCATION: Peroxisome.	aerobic respiration [GO:0009060]; aging [GO:0007568]; cellular response to growth factor stimulus [GO:0071363]; cholesterol metabolic process [GO:0008203]; hemoglobin metabolic process [GO:0020027]; hydrogen peroxide catabolic process [GO:0042744]; kidney development [GO:0001822]; negative regulation of apoptotic process [GO:0043066]; negative regulation of NF-kappaB transcription factor activity…	cytoplasm [GO:0005737]; cytosol [GO:0005829]; endoplasmic reticulum [GO:0005783]; extracellular space [GO:0005615]; Golgi apparatus [GO:0005794]; intracellular membrane-bounded organelle [GO:0043231]; lysosome [GO:0005764]; mitochondrial intermembrane space [GO:0005758]; mitochondrion [GO:0005739]; peroxisomal membrane [GO:0005778]; peroxisome [GO:0005777]; plasma membrane [GO:0005886]; protein-c…	cytoplasm [GO:0005737]; cytosol [GO:0005829]; endoplasmic reticulum [GO:0005783]; extracellular space [GO:0005615]; Golgi apparatus [GO:0005794]; intracellular membrane-bounded organelle [GO:0043231]; lysosome [GO:0005764]; mitochondrial intermembrane space [GO:0005758]; mitochondrion [GO:0005739]; peroxisomal membrane [GO:0005778]; peroxisome [GO:0005777]; plasma membrane [GO:0005886]; protein-c…	aminoacylase activity [GO:0004046]; antioxidant activity [GO:0016209]; catalase activity [GO:0004096]; enzyme binding [GO:0019899]; heme binding [GO:0020037]; identical protein binding [GO:0042802]; metal ion binding [GO:0046872]; NADP binding [GO:0050661]; oxidoreductase activity, acting on peroxide as acceptor [GO:0016684]; peroxisome targeting sequence binding [GO:0000268]; protein homodimeriz…	GO:0000268; GO:0000302; GO:0001657; GO:0001666; GO:0001822; GO:0004046; GO:0004096; GO:0005615; GO:0005737; GO:0005739; GO:0005758; GO:0005764; GO:0005777; GO:0005778; GO:0005783; GO:0005794; GO:0005829; GO:0005886; GO:0006641; GO:0006979; GO:0007568; GO:0008203; GO:0009060; GO:0009642; GO:0009650; GO:0010193; GO:0010288; GO:0014068; GO:0014823; GO:0014854; GO:0016209; GO:0016684; GO:0019899; GO:…	RecName: Full=Catalase - [CATA_MOUSE]	67.17	1	30	30	1279.71	3.09414e+09	2.82954e+09	4.29353e+09	3.10508e+09	173	152	153	184	161	142	143	172	527	59.7577	7.88428
Q8R0Y6	AL1L1	Cytosolic 10-formyltetrahydrofolate dehydrogenase		SUBCELLULAR LOCATION: Cytoplasm.	10-formyltetrahydrofolate catabolic process [GO:0009258]; biosynthetic process [GO:0009058]; one-carbon metabolic process [GO:0006730]	cytosol [GO:0005829]; mitochondrion [GO:0005739]; protein-containing complex [GO:0032991]	cytosol [GO:0005829]; mitochondrion [GO:0005739]; protein-containing complex [GO:0032991]; aldehyde dehydrogenase (NAD+) activity [GO:0004029]; aldehyde dehydrogenase (NADP+) activity [GO:0033721]; aldehyde dehydrogenase [NAD(P)+] activity [GO:0004030]; formyltetrahydrofolate dehydrogenase activity [GO:0016155]; hydroxymethyl-, formyl- and related transferase activity [GO:0016742]; protein-contai…	aldehyde dehydrogenase (NAD+) activity [GO:0004029]; aldehyde dehydrogenase (NADP+) activity [GO:0033721]; aldehyde dehydrogenase [NAD(P)+] activity [GO:0004030]; formyltetrahydrofolate dehydrogenase activity [GO:0016155]; hydroxymethyl-, formyl- and related transferase activity [GO:0016742]; protein-containing complex binding [GO:0044877]	GO:0004029; GO:0004030; GO:0005739; GO:0005829; GO:0006730; GO:0009058; GO:0009258; GO:0016155; GO:0016742; GO:0032991; GO:0033721; GO:0044877	RecName: Full=Cytosolic 10-formyltetrahydrofolate dehydrogenase; Short=10-FTHFDH; Short=FDH; AltName: Full=Aldehyde dehydrogenase family 1 member L1 - [AL1L1_MOUSE]	75.5	1	53	59	1304.84	2.20723e+09	1334282431	1.40251e+09	1.4636e+09	185	181	136	173	173	169	127	161	902	98.6465	5.90967
P19096	FAS	Fatty acid synthase	FUNCTION: Fatty acid synthetase catalyzes the formation of long-chain fatty acids from acetyl-CoA, malonyl-CoA and NADPH. This multifunctional protein has 7 catalytic activities as an acyl carrier protein.	SUBCELLULAR LOCATION: Cytoplasm {ECO:0000250}. Melanosome {ECO:0000250}.	acetyl-CoA metabolic process [GO:0006084]; cellular response to interleukin-4 [GO:0071353]; establishment of endothelial intestinal barrier [GO:0090557]; ether lipid biosynthetic process [GO:0008611]; fatty acid biosynthetic process [GO:0006633]; glandular epithelial cell development [GO:0002068]; mammary gland development [GO:0030879]; monocyte differentiation [GO:0030224]; neutrophil differenti…	cytoplasm [GO:0005737]; cytosol [GO:0005829]; glycogen granule [GO:0042587]; Golgi apparatus [GO:0005794]; melanosome [GO:0042470]; mitochondrion [GO:0005739]; plasma membrane [GO:0005886]	cytoplasm [GO:0005737]; cytosol [GO:0005829]; glycogen granule [GO:0042587]; Golgi apparatus [GO:0005794]; melanosome [GO:0042470]; mitochondrion [GO:0005739]; plasma membrane [GO:0005886]; (3R)-hydroxymyristoyl-[acyl-carrier-protein] dehydratase activity [GO:0008659]; 3-hydroxydecanoyl-[acyl-carrier-protein] dehydratase activity [GO:0008693]; 3-hydroxyoctanoyl-[acyl-carrier-protein] dehydratase …	(3R)-hydroxymyristoyl-[acyl-carrier-protein] dehydratase activity [GO:0008659]; [acyl-carrier-protein] S-acetyltransferase activity [GO:0004313]; [acyl-carrier-protein] S-malonyltransferase activity [GO:0004314]; 3-hydroxydecanoyl-[acyl-carrier-protein] dehydratase activity [GO:0008693]; 3-hydroxyoctanoyl-[acyl-carrier-protein] dehydratase activity [GO:0047451]; 3-hydroxypalmitoyl-[acyl-carrier-p…	GO:0002068; GO:0004312; GO:0004313; GO:0004314; GO:0004315; GO:0004316; GO:0004317; GO:0004320; GO:0005737; GO:0005739; GO:0005794; GO:0005829; GO:0005886; GO:0006084; GO:0006633; GO:0008144; GO:0008611; GO:0008659; GO:0008693; GO:0009888; GO:0016295; GO:0016296; GO:0030223; GO:0030224; GO:0030879; GO:0031177; GO:0042470; GO:0042587; GO:0042802; GO:0047117; GO:0047451; GO:0070402; GO:0071353; GO:…	RecName: Full=Fatty acid synthase; Includes: RecName: Full=[Acyl-carrier-protein] S-acetyltransferase; Includes: RecName: Full=[Acyl-carrier-protein] S-malonyltransferase; Includes: RecName: Full=3-oxoacyl-[acyl-carrier-protein] synthase; Includes: RecName: Full=3-oxoacyl-[acyl-carrier-protein] reductase; Includes: RecName: Full=3-hydroxyacyl-[acyl-carrier-protein] dehydratase; Includes: RecName:…	47.96	3	89	90	964.617	4.70208e+08	3.29088e+08	3.3082e+08	4.88107e+08	139	88	99	173	130	82	92	161	2504	272.257	6.58057
P10649	GSTM1	Glutathione S-transferase Mu 1	FUNCTION: Conjugation of reduced glutathione to a wide number of exogenous and endogenous hydrophobic electrophiles. Involved in the formation of glutathione conjugates of both prostaglandin A2 (PGA2) and prostaglandin J2 (PGJ2). Participates in the formation of novel hepoxilin regioisomers. {ECO:0000250|UniProtKB:P09488}.	SUBCELLULAR LOCATION: Cytoplasm.	cellular response to drug [GO:0035690]; glutathione metabolic process [GO:0006749]; xenobiotic catabolic process [GO:0042178]	cytosol [GO:0005829]; extracellular region [GO:0005576]; intercellular bridge [GO:0045171]; myelin sheath [GO:0043209]; protein-containing complex [GO:0032991]	cytosol [GO:0005829]; extracellular region [GO:0005576]; intercellular bridge [GO:0045171]; myelin sheath [GO:0043209]; protein-containing complex [GO:0032991]; glutathione binding [GO:0043295]; glutathione transferase activity [GO:0004364]; identical protein binding [GO:0042802]; nickel cation binding [GO:0016151]; protein kinase binding [GO:0019901]; steroid binding [GO:0005496]; cellular respo…	glutathione binding [GO:0043295]; glutathione transferase activity [GO:0004364]; identical protein binding [GO:0042802]; nickel cation binding [GO:0016151]; protein kinase binding [GO:0019901]; steroid binding [GO:0005496]	GO:0004364; GO:0005496; GO:0005576; GO:0005829; GO:0006749; GO:0016151; GO:0019901; GO:0032991; GO:0035690; GO:0042178; GO:0042802; GO:0043209; GO:0043295; GO:0045171	RecName: Full=Glutathione S-transferase Mu 1; AltName: Full=GST 1-1; AltName: Full=GST class-mu 1; AltName: Full=Glutathione S-transferase GT8.7; AltName: Full=pmGT10 - [GSTM1_MOUSE]	70.18	1	14	21	1125.06	9.21337e+09	4.35541e+09	11329632901	8.74994e+09	151	114	152	165	141	106	142	154	218	25.9531	7.94287
P16460	ASSY	Argininosuccinate synthase	FUNCTION: One of the enzymes of the urea cycle, the metabolic pathway transforming neurotoxic amonia produced by protein catabolism into inocuous urea in the liver of ureotelic animals. Catalyzes the formation of arginosuccinate from aspartate, citrulline and ATP and together with ASL it is responsible for the biosynthesis of arginine in most body tissues. {ECO:0000250|UniProtKB:P00966}.	SUBCELLULAR LOCATION: Cytoplasm, cytosol {ECO:0000250|UniProtKB:P00966}.	acute-phase response [GO:0006953]; aging [GO:0007568]; arginine biosynthetic process [GO:0006526]; argininosuccinate metabolic process [GO:0000053]; aspartate metabolic process [GO:0006531]; cellular response to amine stimulus [GO:0071418]; cellular response to amino acid stimulus [GO:0071230]; cellular response to ammonium ion [GO:0071242]; cellular response to cAMP [GO:0071320]; cellular respon…	cell body fiber [GO:0070852]; cytoplasm [GO:0005737]; cytosol [GO:0005829]; endoplasmic reticulum [GO:0005783]; lysosome [GO:0005764]; mitochondrial outer membrane [GO:0005741]; mitochondrion [GO:0005739]; myelin sheath [GO:0043209]; neuronal cell body [GO:0043025]; neuron projection [GO:0043005]; nucleus [GO:0005634]; perikaryon [GO:0043204]	cell body fiber [GO:0070852]; cytoplasm [GO:0005737]; cytosol [GO:0005829]; endoplasmic reticulum [GO:0005783]; lysosome [GO:0005764]; mitochondrial outer membrane [GO:0005741]; mitochondrion [GO:0005739]; myelin sheath [GO:0043209]; neuron projection [GO:0043005]; neuronal cell body [GO:0043025]; nucleus [GO:0005634]; perikaryon [GO:0043204]; amino acid binding [GO:0016597]; argininosuccinate sy…	amino acid binding [GO:0016597]; argininosuccinate synthase activity [GO:0004055]; ATP binding [GO:0005524]; identical protein binding [GO:0042802]; toxic substance binding [GO:0015643]	GO:0000050; GO:0000052; GO:0000053; GO:0001822; GO:0001889; GO:0004055; GO:0005524; GO:0005634; GO:0005737; GO:0005739; GO:0005741; GO:0005764; GO:0005783; GO:0005829; GO:0006526; GO:0006531; GO:0006953; GO:0007494; GO:0007568; GO:0007584; GO:0007623; GO:0010043; GO:0010046; GO:0015643; GO:0016597; GO:0032355; GO:0042802; GO:0043005; GO:0043025; GO:0043204; GO:0043209; GO:0045429; GO:0051384; GO:…	RecName: Full=Argininosuccinate synthase; AltName: Full=Citrulline--aspartate ligase - [ASSY_MOUSE]	65.78	1	27	27	995.546	6.06528e+09	3.67304e+09	5.94888e+09	5.56781e+09	131	103	128	153	122	96	119	143	412	46.555	8.22119
P24549	AL1A1	Retinal dehydrogenase 1	FUNCTION: Can convert/oxidize retinaldehyde to retinoic acid. Binds free retinal and cellular retinol-binding protein-bound retinal (By similarity). May have a broader specificity and oxidize other aldehydes in vivo (By similarity). {ECO:0000250|UniProtKB:P00352, ECO:0000250|UniProtKB:P51647}.	SUBCELLULAR LOCATION: Cytoplasm, cytosol {ECO:0000250|UniProtKB:P48644}.	9-cis-retinoic acid biosynthetic process [GO:0042904]; 9-cis-retinoic acid metabolic process [GO:0042905]; embryonic eye morphogenesis [GO:0048048]; negative regulation of cold-induced thermogenesis [GO:0120163]; optic cup morphogenesis involved in camera-type eye development [GO:0002072]; oxidation-reduction process [GO:0055114]; positive regulation of apoptotic process [GO:0043065]; response to…	cytoplasm [GO:0005737]; cytosol [GO:0005829]; nucleus [GO:0005634]	cytoplasm [GO:0005737]; cytosol [GO:0005829]; nucleus [GO:0005634]; 3-chloroallyl aldehyde dehydrogenase activity [GO:0004028]; aldehyde dehydrogenase (NAD+) activity [GO:0004029]; benzaldehyde dehydrogenase (NAD+) activity [GO:0018479]; identical protein binding [GO:0042802]; NAD binding [GO:0051287]; retinal dehydrogenase activity [GO:0001758]; 9-cis-retinoic acid biosynthetic process [GO:00429…	3-chloroallyl aldehyde dehydrogenase activity [GO:0004028]; aldehyde dehydrogenase (NAD+) activity [GO:0004029]; benzaldehyde dehydrogenase (NAD+) activity [GO:0018479]; identical protein binding [GO:0042802]; NAD binding [GO:0051287]; retinal dehydrogenase activity [GO:0001758]	GO:0001523; GO:0001758; GO:0002072; GO:0002138; GO:0004028; GO:0004029; GO:0005634; GO:0005737; GO:0005829; GO:0006979; GO:0018479; GO:0042493; GO:0042572; GO:0042573; GO:0042802; GO:0042904; GO:0042905; GO:0043065; GO:0045471; GO:0048048; GO:0051287; GO:0055114; GO:0120163	RecName: Full=Retinal dehydrogenase 1; Short=RALDH 1; Short=RalDH1; AltName: Full=ALDH-E1; AltName: Full=ALHDII; AltName: Full=Aldehyde dehydrogenase family 1 member A1; AltName: Full=Aldehyde dehydrogenase, cytosolic - [AL1A1_MOUSE]	61.68	1	18	31	1043.87	3.1018e+09	1.46953e+09	1.84045e+09	1.77094e+09	145	139	103	153	135	130	96	143	501	54.4328	7.79639
P20029	GRP78	78 kDa glucose-regulated protein	FUNCTION: Endoplasmic reticulum chaperone that plays a key role in protein folding and quality control in the endoplasmic reticulum lumen (PubMed:12411443, PubMed:12475965). Involved in the correct folding of proteins and degradation of misfolded proteins via its interaction with DNAJC10/ERdj5, probably to facilitate the release of DNAJC10/ERdj5 from its substrate (PubMed:12411443). Acts as a key…	SUBCELLULAR LOCATION: Endoplasmic reticulum lumen {ECO:0000255|PROSITE-ProRule:PRU10138, ECO:0000269|PubMed:21992152}. Cytoplasm {ECO:0000269|PubMed:21992152}.	cellular response to antibiotic [GO:0071236]; cellular response to calcium ion [GO:0071277]; cellular response to cAMP [GO:0071320]; cellular response to drug [GO:0035690]; cellular response to gamma radiation [GO:0071480]; cellular response to glucose starvation [GO:0042149]; cellular response to interleukin-4 [GO:0071353]; cellular response to manganese ion [GO:0071287]; cellular response to ne…	cell surface [GO:0009986]; COP9 signalosome [GO:0008180]; cytoplasm [GO:0005737]; cytosol [GO:0005829]; endoplasmic reticulum [GO:0005783]; endoplasmic reticulum chaperone complex [GO:0034663]; endoplasmic reticulum-Golgi intermediate compartment [GO:0005793]; endoplasmic reticulum lumen [GO:0005788]; endoplasmic reticulum membrane [GO:0005789]; extracellular region [GO:0005576]; integral compone…	cell surface [GO:0009986]; COP9 signalosome [GO:0008180]; cytoplasm [GO:0005737]; cytosol [GO:0005829]; endoplasmic reticulum [GO:0005783]; endoplasmic reticulum chaperone complex [GO:0034663]; endoplasmic reticulum lumen [GO:0005788]; endoplasmic reticulum membrane [GO:0005789]; endoplasmic reticulum-Golgi intermediate compartment [GO:0005793]; extracellular region [GO:0005576]; integral compone…	ATPase activity [GO:0016887]; ATPase activity, coupled [GO:0042623]; ATP binding [GO:0005524]; enzyme binding [GO:0019899]; heat shock protein binding [GO:0031072]; misfolded protein binding [GO:0051787]; protein domain specific binding [GO:0019904]; protein folding chaperone [GO:0044183]; ribosome binding [GO:0043022]; ubiquitin protein ligase binding [GO:0031625]; unfolded protein binding [GO:0…	GO:0001554; GO:0005524; GO:0005576; GO:0005634; GO:0005737; GO:0005739; GO:0005783; GO:0005788; GO:0005789; GO:0005790; GO:0005793; GO:0005829; GO:0005886; GO:0006983; GO:0006986; GO:0008180; GO:0009986; GO:0010976; GO:0016020; GO:0016887; GO:0019899; GO:0019904; GO:0021589; GO:0021680; GO:0030176; GO:0030182; GO:0030335; GO:0030433; GO:0030496; GO:0030512; GO:0030968; GO:0031072; GO:0031204; GO:…	RecName: Full=Endoplasmic reticulum chaperone BiP; AltName: Full=78 kDa glucose-regulated protein; Short=GRP-78; AltName: Full=Binding-immunoglobulin protein; Short=BiP; AltName: Full=Heat shock protein 70 family protein 5; Short=HSP70 family protein 5; AltName: Full=Heat shock protein family A member 5; AltName: Full=Immunoglobulin heavy chain-binding protein; Flags: Precursor - [BIP_MOUSE]	52.21	1	37	39	1014.88	1.80517e+09	9.79696e+08	3.29489e+09	2.25909e+09	117	108	156	144	109	101	146	134	655	72.3775	5.16064
P09103	PDIA1	Protein disulfide-isomerase	FUNCTION: This multifunctional protein catalyzes the formation, breakage and rearrangement of disulfide bonds. At the cell surface, seems to act as a reductase that cleaves disulfide bonds of proteins attached to the cell. May therefore cause structural modifications of exofacial proteins. Inside the cell, seems to form/rearrange disulfide bonds of nascent proteins. At high concentrations, functi…	SUBCELLULAR LOCATION: Endoplasmic reticulum {ECO:0000250|UniProtKB:P07237}. Endoplasmic reticulum lumen {ECO:0000250|UniProtKB:P07237}. Melanosome {ECO:0000250|UniProtKB:P07237}. Cell membrane {ECO:0000269|PubMed:21670307}; Peripheral membrane protein {ECO:0000305}. Note=Highly abundant. In some cell types, seems to be also secreted or associated with the plasma membrane, where it undergoes const…	cell redox homeostasis [GO:0045454]; cellular response to hypoxia [GO:0071456]; cellular response to interleukin-7 [GO:0098761]; peptidyl-proline hydroxylation to 4-hydroxy-L-proline [GO:0018401]; positive regulation of cell adhesion [GO:0045785]; positive regulation of substrate adhesion-dependent cell spreading [GO:1900026]; positive regulation of viral entry into host cell [GO:0046598]; protei…	cell [GO:0005623]; cytoskeleton [GO:0005856]; cytosol [GO:0005829]; endoplasmic reticulum [GO:0005783]; endoplasmic reticulum chaperone complex [GO:0034663]; endoplasmic reticulum-Golgi intermediate compartment [GO:0005793]; endoplasmic reticulum lumen [GO:0005788]; external side of plasma membrane [GO:0009897]; lamellipodium [GO:0030027]; melanosome [GO:0042470]; procollagen-proline 4-dioxygenas…	cell [GO:0005623]; cytoskeleton [GO:0005856]; cytosol [GO:0005829]; endoplasmic reticulum [GO:0005783]; endoplasmic reticulum chaperone complex [GO:0034663]; endoplasmic reticulum lumen [GO:0005788]; endoplasmic reticulum-Golgi intermediate compartment [GO:0005793]; external side of plasma membrane [GO:0009897]; lamellipodium [GO:0030027]; melanosome [GO:0042470]; procollagen-proline 4-dioxygenas…	actin binding [GO:0003779]; enzyme binding [GO:0019899]; integrin binding [GO:0005178]; peptide disulfide oxidoreductase activity [GO:0015037]; procollagen-proline 4-dioxygenase activity [GO:0004656]; protein-containing complex binding [GO:0044877]; protein disulfide isomerase activity [GO:0003756]; protein heterodimerization activity [GO:0046982]	GO:0003756; GO:0003779; GO:0004656; GO:0005178; GO:0005623; GO:0005783; GO:0005788; GO:0005793; GO:0005829; GO:0005856; GO:0006457; GO:0009897; GO:0015037; GO:0016222; GO:0018401; GO:0019899; GO:0030027; GO:0032991; GO:0034663; GO:0034976; GO:0042470; GO:0044877; GO:0045454; GO:0045785; GO:0046598; GO:0046982; GO:0071456; GO:0098761; GO:1900026; GO:1902175	RecName: Full=Protein disulfide-isomerase; Short=PDI; AltName: Full=Cellular thyroid hormone-binding protein; AltName: Full=Endoplasmic reticulum resident protein 59; Short=ER protein 59; Short=ERp59; AltName: Full=Prolyl 4-hydroxylase subunit beta; AltName: Full=p55; Flags: Precursor - [PDIA1_MOUSE]	61.49	2	32	32	866.029	2.17781e+09	1398889281	3.78772e+09	2.54656e+09	99	88	119	142	92	82	111	133	509	57.0228	4.88135
Q9R0H0	ACOX1	Peroxisomal acyl-coenzyme A oxidase 1	FUNCTION: Catalyzes the desaturation of acyl-CoAs to 2-trans-enoyl-CoAs (By similarity). Isoform 1 shows highest activity against medium-chain fatty acyl-CoAs and activity decreases with increasing chain length (By similarity). Isoform 2 is active against a much broader range of substrates and shows activity towards very long-chain acyl-CoAs (By similarity). {ECO:0000250|UniProtKB:P07872}.	SUBCELLULAR LOCATION: Peroxisome {ECO:0000250|UniProtKB:P07872}.	cholesterol homeostasis [GO:0042632]; fatty acid beta-oxidation [GO:0006635]; fatty acid beta-oxidation using acyl-CoA oxidase [GO:0033540]; fatty acid oxidation [GO:0019395]; generation of precursor metabolites and energy [GO:0006091]; lipid homeostasis [GO:0055088]; lipid metabolic process [GO:0006629]; peroxisome fission [GO:0016559]; prostaglandin metabolic process [GO:0006693]; spermatogenes…	cytoplasm [GO:0005737]; cytosol [GO:0005829]; mitochondrion [GO:0005739]; peroxisomal membrane [GO:0005778]; peroxisome [GO:0005777]	cytoplasm [GO:0005737]; cytosol [GO:0005829]; mitochondrion [GO:0005739]; peroxisomal membrane [GO:0005778]; peroxisome [GO:0005777]; acyl-CoA oxidase activity [GO:0003997]; FAD binding [GO:0071949]; fatty acid binding [GO:0005504]; flavin adenine dinucleotide binding [GO:0050660]; palmitoyl-CoA oxidase activity [GO:0016401]; PDZ domain binding [GO:0030165]; protein homodimerization activity [GO:…	acyl-CoA oxidase activity [GO:0003997]; FAD binding [GO:0071949]; fatty acid binding [GO:0005504]; flavin adenine dinucleotide binding [GO:0050660]; palmitoyl-CoA oxidase activity [GO:0016401]; PDZ domain binding [GO:0030165]; protein homodimerization activity [GO:0042803]; protein N-terminus binding [GO:0047485]	GO:0000038; GO:0003997; GO:0005504; GO:0005737; GO:0005739; GO:0005777; GO:0005778; GO:0005829; GO:0006091; GO:0006629; GO:0006635; GO:0006693; GO:0007283; GO:0016401; GO:0016559; GO:0019395; GO:0030165; GO:0033540; GO:0042632; GO:0042803; GO:0047485; GO:0050660; GO:0055088; GO:0071949	RecName: Full=Peroxisomal acyl-coenzyme A oxidase 1; Short=AOX; AltName: Full=Palmitoyl-CoA oxidase; Contains: RecName: Full=Peroxisomal acyl-CoA oxidase 1, A chain; Contains: RecName: Full=Peroxisomal acyl-CoA oxidase 1, B chain; Contains: RecName: Full=Peroxisomal acyl-CoA oxidase 1, C chain - [ACOX1_MOUSE]	66.57	1	35	35	924.022	1.66059e+09	753345159	1.39703e+09	1.27664e+09	133	109	102	134	124	102	95	125	661	74.6013	8.48486
P19157	GSTP1	Glutathione S-transferase P 1	FUNCTION: Conjugation of reduced glutathione to a wide number of exogenous and endogenous hydrophobic electrophiles. Involved in the formation of glutathione conjugates of both prostaglandin A2 (PGA2) and prostaglandin J2 (PGJ2). Participates in the formation of novel hepoxilin regioisomers. Regulates negatively CDK5 activity via p25/p35 translocation to prevent neurodegeneration. {ECO:0000250|Un…	SUBCELLULAR LOCATION: Cytoplasm {ECO:0000250}. Mitochondrion {ECO:0000250}. Nucleus {ECO:0000250}. Note=The 83 N-terminal amino acids function as un uncleaved transit peptide, and arginine residues within it are crucial for mitochondrial localization. {ECO:0000250}.	animal organ regeneration [GO:0031100]; cellular response to cell-matrix adhesion [GO:0071460]; cellular response to epidermal growth factor stimulus [GO:0071364]; cellular response to glucocorticoid stimulus [GO:0071385]; cellular response to insulin stimulus [GO:0032869]; cellular response to lipopolysaccharide [GO:0071222]; common myeloid progenitor cell proliferation [GO:0035726]; glutathione…	cytoplasm [GO:0005737]; cytosol [GO:0005829]; mitochondrion [GO:0005739]; nucleus [GO:0005634]; plasma membrane [GO:0005886]; protein-containing complex [GO:0032991]; TRAF2-GSTP1 complex [GO:0097057]	cytoplasm [GO:0005737]; cytosol [GO:0005829]; mitochondrion [GO:0005739]; nucleus [GO:0005634]; plasma membrane [GO:0005886]; protein-containing complex [GO:0032991]; TRAF2-GSTP1 complex [GO:0097057]; dinitrosyl-iron complex binding [GO:0035731]; drug binding [GO:0008144]; fatty acid binding [GO:0005504]; glutathione binding [GO:0043295]; glutathione peroxidase activity [GO:0004602]; glutathione …	dinitrosyl-iron complex binding [GO:0035731]; drug binding [GO:0008144]; fatty acid binding [GO:0005504]; glutathione binding [GO:0043295]; glutathione peroxidase activity [GO:0004602]; glutathione transferase activity [GO:0004364]; JUN kinase binding [GO:0008432]; kinase regulator activity [GO:0019207]; protein kinase binding [GO:0019901]; S-nitrosoglutathione binding [GO:0035730]	GO:0000302; GO:0002674; GO:0004364; GO:0004602; GO:0005504; GO:0005634; GO:0005737; GO:0005739; GO:0005829; GO:0005886; GO:0006749; GO:0006805; GO:0008144; GO:0008432; GO:0009636; GO:0014003; GO:0019207; GO:0019901; GO:0031100; GO:0031667; GO:0032355; GO:0032691; GO:0032720; GO:0032869; GO:0032872; GO:0032873; GO:0032930; GO:0032991; GO:0033591; GO:0035726; GO:0035730; GO:0035731; GO:0043066; GO:…	RecName: Full=Glutathione S-transferase P 1; Short=Gst P1; AltName: Full=GST YF-YF; AltName: Full=GST class-pi; AltName: Full=GST-piB; AltName: Full=Preadipocyte growth factor - [GSTP1_MOUSE]	70.95	2	16	16	1165.66	2.0876e+10	5.39859e+09	7.48385e+09	7.14078e+09	192	148	130	133	179	138	121	124	210	23.5941	7.86963
P60710	ACTB	Actin, cytoplasmic 1	FUNCTION: Actin is a highly conserved protein that polymerizes to produce filaments that form cross-linked networks in the cytoplasm of cells (By similarity). Actin exists in both monomeric (G-actin) and polymeric (F-actin) forms, both forms playing key functions, such as cell motility and contraction (By similarity). In addition to their role in the cytoplasmic cytoskeleton, G- and F-actin also …	SUBCELLULAR LOCATION: Cytoplasm, cytoskeleton. Nucleus {ECO:0000269|PubMed:23558171, ECO:0000269|PubMed:25759381}. Note=Localized in cytoplasmic mRNP granules containing untranslated mRNAs. {ECO:0000250|UniProtKB:P60709}.	adherens junction assembly [GO:0034333]; apical protein localization [GO:0045176]; axonogenesis [GO:0007409]; cell motility [GO:0048870]; cellular response to cytochalasin B [GO:0072749]; cellular response to electrical stimulus [GO:0071257]; establishment or maintenance of cell polarity [GO:0007163]; morphogenesis of a polarized epithelium [GO:0001738]; negative regulation of cyclin-dependent pr…	actin cytoskeleton [GO:0015629]; actin filament [GO:0005884]; adherens junction [GO:0005912]; apical junction complex [GO:0043296]; axon [GO:0030424]; calyx of Held [GO:0044305]; cell-cell junction [GO:0005911]; cortical cytoskeleton [GO:0030863]; cytoplasm [GO:0005737]; cytoplasmic ribonucleoprotein granule [GO:0036464]; cytoskeleton [GO:0005856]; cytosol [GO:0005829]; dense body [GO:0097433]; f…	actin cytoskeleton [GO:0015629]; actin filament [GO:0005884]; adherens junction [GO:0005912]; apical junction complex [GO:0043296]; axon [GO:0030424]; calyx of Held [GO:0044305]; cell-cell junction [GO:0005911]; cortical cytoskeleton [GO:0030863]; cytoplasm [GO:0005737]; cytoplasmic ribonucleoprotein granule [GO:0036464]; cytoskeleton [GO:0005856]; cytosol [GO:0005829]; dense body [GO:0097433]; f…	ATP binding [GO:0005524]; identical protein binding [GO:0042802]; kinesin binding [GO:0019894]; nitric-oxide synthase binding [GO:0050998]; protein kinase binding [GO:0019901]; structural constituent of postsynaptic actin cytoskeleton [GO:0098973]; Tat protein binding [GO:0030957]	GO:0000079; GO:0001725; GO:0001738; GO:0002102; GO:0005524; GO:0005634; GO:0005737; GO:0005829; GO:0005856; GO:0005884; GO:0005886; GO:0005911; GO:0005912; GO:0005925; GO:0007163; GO:0007409; GO:0014069; GO:0015629; GO:0016020; GO:0019894; GO:0019901; GO:0022898; GO:0030027; GO:0030424; GO:0030863; GO:0030957; GO:0032091; GO:0032991; GO:0034333; GO:0035267; GO:0036464; GO:0042802; GO:0043209; GO:…	RecName: Full=Actin, cytoplasmic 1; AltName: Full=Beta-actin; Contains: RecName: Full=Actin, cytoplasmic 1, N-terminally processed - [ACTB_MOUSE]	66.4	2	8	22	916.289	5028980711	3.747e+09	5.96201e+09	4.94922e+09	110	115	116	133	103	107	108	124	375	41.7097	5.47803
P56480	ATPB	ATP synthase subunit beta, mitochondrial	FUNCTION: Mitochondrial membrane ATP synthase (F(1)F(0) ATP synthase or Complex V) produces ATP from ADP in the presence of a proton gradient across the membrane which is generated by electron transport complexes of the respiratory chain. F-type ATPases consist of two structural domains, F(1) - containing the extramembraneous catalytic core, and F(0) - containing the membrane proton channel, link…	SUBCELLULAR LOCATION: Mitochondrion inner membrane {ECO:0000250|UniProtKB:P00829}; Peripheral membrane protein {ECO:0000250|UniProtKB:P00829}; Matrix side {ECO:0000250|UniProtKB:P00829}.	angiogenesis [GO:0001525]; ATP biosynthetic process [GO:0006754]; ATP metabolic process [GO:0046034]; cellular response to interleukin-7 [GO:0098761]; lipid metabolic process [GO:0006629]; mitochondrial ATP synthesis coupled proton transport [GO:0042776]; negative regulation of cell adhesion involved in substrate-bound cell migration [GO:0006933]; positive regulation of blood vessel endothelial c…	cell [GO:0005623]; cell surface [GO:0009986]; membrane [GO:0016020]; membrane raft [GO:0045121]; mitochondrial inner membrane [GO:0005743]; mitochondrial membrane [GO:0031966]; mitochondrial nucleoid [GO:0042645]; mitochondrial proton-transporting ATP synthase complex [GO:0005753]; mitochondrial proton-transporting ATP synthase complex, catalytic core F(1) [GO:0000275]; mitochondrion [GO:0005739]…	cell [GO:0005623]; cell surface [GO:0009986]; membrane [GO:0016020]; membrane raft [GO:0045121]; mitochondrial inner membrane [GO:0005743]; mitochondrial membrane [GO:0031966]; mitochondrial nucleoid [GO:0042645]; mitochondrial proton-transporting ATP synthase complex [GO:0005753]; mitochondrial proton-transporting ATP synthase complex, catalytic core F(1) [GO:0000275]; mitochondrion [GO:0005739]…	ADP binding [GO:0043531]; angiostatin binding [GO:0043532]; ATPase activity [GO:0016887]; ATP binding [GO:0005524]; calcium ion binding [GO:0005509]; lipoprotein particle receptor activity [GO:0030228]; MHC class I protein binding [GO:0042288]; proton-transporting ATPase activity, rotational mechanism [GO:0046961]; proton-transporting ATP synthase activity, rotational mechanism [GO:0046933]	GO:0000275; GO:0001525; GO:0005509; GO:0005524; GO:0005623; GO:0005739; GO:0005743; GO:0005753; GO:0005886; GO:0006629; GO:0006754; GO:0006898; GO:0006933; GO:0009986; GO:0016020; GO:0016887; GO:0030228; GO:0031966; GO:0042288; GO:0042645; GO:0042776; GO:0043209; GO:0043531; GO:0043532; GO:0043536; GO:0045121; GO:0045259; GO:0045261; GO:0046034; GO:0046933; GO:0046961; GO:0051453; GO:0098761; GO:…	RecName: Full=ATP synthase subunit beta, mitochondrial; AltName: Full=ATP synthase F1 subunit beta; Flags: Precursor - [ATPB_MOUSE]	58.6	1	23	23	972.349	3.69852e+09	1.83763e+09	2.39518e+09	2.11562e+09	141	126	108	128	132	118	101	119	529	56.2655	5.33838
Q9DBM2	ECHP	Peroxisomal bifunctional enzyme	FUNCTION: Peroxisomal trifunctional enzyme possessing 2-enoyl-CoA hydratase, 3-hydroxyacyl-CoA dehydrogenase, and delta 3, delta 2-enoyl-CoA isomerase activities. Catalyzes two of the four reactions of the long straight chain fatty acids peroxisomal beta-oxidation pathway. Optimal isomerase for 2,5 double bonds into 3,5 form isomerization in a range of enoyl-CoA species. Also able to isomerize bo…	SUBCELLULAR LOCATION: Peroxisome {ECO:0000305|PubMed:24075987}.	acyl-CoA metabolic process [GO:0006637]; fatty acid beta-oxidation [GO:0006635]; internal protein amino acid acetylation [GO:0006475]	cytosol [GO:0005829]; mitochondrion [GO:0005739]; peroxisome [GO:0005777]	cytosol [GO:0005829]; mitochondrion [GO:0005739]; peroxisome [GO:0005777]; 3-hydroxyacyl-CoA dehydrogenase activity [GO:0003857]; dodecenoyl-CoA delta-isomerase activity [GO:0004165]; enoyl-CoA hydratase activity [GO:0004300]; enzyme binding [GO:0019899]; intramolecular oxidoreductase activity, transposing C=C bonds [GO:0016863]; long-chain-3-hydroxyacyl-CoA dehydrogenase activity [GO:0016509]; a…	3-hydroxyacyl-CoA dehydrogenase activity [GO:0003857]; dodecenoyl-CoA delta-isomerase activity [GO:0004165]; enoyl-CoA hydratase activity [GO:0004300]; enzyme binding [GO:0019899]; intramolecular oxidoreductase activity, transposing C=C bonds [GO:0016863]; long-chain-3-hydroxyacyl-CoA dehydrogenase activity [GO:0016509]	GO:0003857; GO:0004165; GO:0004300; GO:0005739; GO:0005777; GO:0005829; GO:0006475; GO:0006635; GO:0006637; GO:0016509; GO:0016863; GO:0019899	RecName: Full=Peroxisomal bifunctional enzyme; Short=PBE; Short=PBFE; AltName: Full=L-peroxisomal bifunctional enzyme; Short=L-PBE; AltName: Full=Multifunctional enzyme 1; Short=MFE1; AltName: Full=Multifunctional protein 1; Short=MFP-1; Includes: RecName: Full=Enoyl-CoA hydratase/3,2-trans-enoyl-CoA isomerase; Includes: RecName: Full=3-hydroxyacyl-CoA dehydrogenase - [ECHP_MOUSE]	62.81	1	41	41	721.046	5.56532e+08	2.8092e+08	1.1975e+09	9.44934e+08	76	65	104	128	71	61	97	119	718	78.252	9.12939
Q91Y97	ALDOB	Fructose-bisphosphate aldolase B		SUBCELLULAR LOCATION: Cytoplasm, cytoskeleton, microtubule organizing center, centrosome, centriolar satellite {ECO:0000250}.	fructose 1,6-bisphosphate metabolic process [GO:0030388]; fructose catabolic process to hydroxyacetone phosphate and glyceraldehyde-3-phosphate [GO:0061624]; fructose metabolic process [GO:0006000]; glycolytic process [GO:0006096]; glycolytic process through fructose-1-phosphate [GO:0061625]; glycolytic process through fructose-6-phosphate [GO:0061615]; NADH oxidation [GO:0006116]; positive regul…	centriolar satellite [GO:0034451]; cytoplasm [GO:0005737]; cytosol [GO:0005829]; intracellular membrane-bounded organelle [GO:0043231]; lysosome [GO:0005764]; microtubule organizing center [GO:0005815]; nucleus [GO:0005634]; perinuclear region of cytoplasm [GO:0048471]; plasma membrane [GO:0005886]; rough endoplasmic reticulum membrane [GO:0030867]; smooth endoplasmic reticulum membrane [GO:00308…	centriolar satellite [GO:0034451]; cytoplasm [GO:0005737]; cytosol [GO:0005829]; intracellular membrane-bounded organelle [GO:0043231]; lysosome [GO:0005764]; microtubule organizing center [GO:0005815]; nucleus [GO:0005634]; perinuclear region of cytoplasm [GO:0048471]; plasma membrane [GO:0005886]; rough endoplasmic reticulum membrane [GO:0030867]; smooth endoplasmic reticulum membrane [GO:00308…	ATPase binding [GO:0051117]; cytoskeletal protein binding [GO:0008092]; fructose-1-phosphate aldolase activity [GO:0061609]; fructose binding [GO:0070061]; fructose-bisphosphate aldolase activity [GO:0004332]; identical protein binding [GO:0042802]; phosphatidylcholine binding [GO:0031210]	GO:0004332; GO:0005634; GO:0005737; GO:0005764; GO:0005815; GO:0005829; GO:0005886; GO:0006000; GO:0006096; GO:0006116; GO:0008092; GO:0010043; GO:0030388; GO:0030867; GO:0030868; GO:0031210; GO:0032781; GO:0034451; GO:0042802; GO:0043231; GO:0043434; GO:0048471; GO:0051117; GO:0061609; GO:0061615; GO:0061624; GO:0061625; GO:0070061; GO:0070072	RecName: Full=Fructose-bisphosphate aldolase B; AltName: Full=Aldolase 2; AltName: Full=Liver-type aldolase - [ALDOB_MOUSE]	82.69	1	25	26	893.092	6.92414e+09	4.43407e+09	8.92703e+09	6.03577e+09	114	108	113	127	106	101	105	119	364	39.4821	8.26514
P16858	G3P	Glyceraldehyde-3-phosphate dehydrogenase	FUNCTION: Has both glyceraldehyde-3-phosphate dehydrogenase and nitrosylase activities, thereby playing a role in glycolysis and nuclear functions, respectively. Glyceraldehyde-3-phosphate dehydrogenase is a key enzyme in glycolysis that catalyzes the first step of the pathway by converting D-glyceraldehyde 3-phosphate (G3P) into 3-phospho-D-glyceroyl phosphate. Modulates the organization and ass…	SUBCELLULAR LOCATION: Cytoplasm, cytosol {ECO:0000250}. Nucleus {ECO:0000250}. Cytoplasm, cytoskeleton {ECO:0000250}. Note=Translocates to the nucleus following S-nitrosylation and interaction with SIAH1, which contains a nuclear localization signal. {ECO:0000250}.	antimicrobial humoral immune response mediated by antimicrobial peptide [GO:0061844]; apoptotic process [GO:0006915]; cAMP-mediated signaling [GO:0019933]; carbohydrate metabolic process [GO:0005975]; cellular response to interferon-gamma [GO:0071346]; defense response to fungus [GO:0050832]; gluconeogenesis [GO:0006094]; glycolytic process [GO:0006096]; killing by host of symbiont cells [GO:0051…	cytoplasm [GO:0005737]; cytosol [GO:0005829]; GAIT complex [GO:0097452]; glutamatergic synapse [GO:0098978]; intracellular membrane-bounded organelle [GO:0043231]; lipid droplet [GO:0005811]; microtubule cytoskeleton [GO:0015630]; mitochondrion [GO:0005739]; myelin sheath [GO:0043209]; nuclear membrane [GO:0031965]; nucleus [GO:0005634]; plasma membrane [GO:0005886]; postsynaptic density, intrace…	cytoplasm [GO:0005737]; cytosol [GO:0005829]; GAIT complex [GO:0097452]; glutamatergic synapse [GO:0098978]; intracellular membrane-bounded organelle [GO:0043231]; lipid droplet [GO:0005811]; microtubule cytoskeleton [GO:0015630]; mitochondrion [GO:0005739]; myelin sheath [GO:0043209]; nuclear membrane [GO:0031965]; nucleus [GO:0005634]; plasma membrane [GO:0005886]; postsynaptic density, intrace…	aspartic-type endopeptidase inhibitor activity [GO:0019828]; disordered domain specific binding [GO:0097718]; enzyme binding [GO:0019899]; glyceraldehyde-3-phosphate dehydrogenase (NAD+) (phosphorylating) activity [GO:0004365]; identical protein binding [GO:0042802]; microtubule binding [GO:0008017]; NAD binding [GO:0051287]; NADP binding [GO:0050661]; peptidyl-cysteine S-nitrosylase activity [GO…	GO:0000226; GO:0004365; GO:0005634; GO:0005737; GO:0005739; GO:0005811; GO:0005829; GO:0005886; GO:0005975; GO:0006094; GO:0006096; GO:0006915; GO:0007275; GO:0008017; GO:0010951; GO:0015630; GO:0017148; GO:0019828; GO:0019899; GO:0019933; GO:0031640; GO:0031965; GO:0035605; GO:0035606; GO:0042802; GO:0043209; GO:0043231; GO:0050661; GO:0050715; GO:0050821; GO:0050832; GO:0051287; GO:0051402; GO:…	RecName: Full=Glyceraldehyde-3-phosphate dehydrogenase; Short=GAPDH; AltName: Full=Peptidyl-cysteine S-nitrosylase GAPDH - [G3P_MOUSE]	48.35	2	17	17	769.374	6.75879e+09	3.9677e+09	8.60483e+09	5.42415e+09	93	86	98	121	87	80	91	113	333	35.7872	8.25049
P10126	EF1A1	Elongation factor 1-alpha 1	FUNCTION: This protein promotes the GTP-dependent binding of aminoacyl-tRNA to the A-site of ribosomes during protein biosynthesis. With PARP1 and TXK, forms a complex that acts as a T helper 1 (Th1) cell-specific transcription factor and binds the promoter of IFN-gamma to directly regulate its transcription, and is thus involved importantly in Th1 cytokine production. {ECO:0000250|UniProtKB:P681…	SUBCELLULAR LOCATION: Cytoplasm {ECO:0000269|PubMed:19856081}. Nucleus {ECO:0000250|UniProtKB:P68104}. Nucleus, nucleolus {ECO:0000250|UniProtKB:P68104}. Cell membrane {ECO:0000250|UniProtKB:P68104}. Note=Colocalizes with DLC1 at actin-rich regions in the cell periphery. Translocates together with ZPR1 from the cytoplasm to the nucleus and nucleolus after treatment with mitogens. Localization at …	cellular response to epidermal growth factor stimulus [GO:0071364]; negative regulation of reactive oxygen species biosynthetic process [GO:1903427]; positive regulation of cell death [GO:0010942]; positive regulation of neuron projection development [GO:0010976]; regulation of D-erythro-sphingosine kinase activity [GO:1900022]; translation [GO:0006412]; translational elongation [GO:0006414]	cortical actin cytoskeleton [GO:0030864]; cytoplasm [GO:0005737]; cytosol [GO:0005829]; myelin sheath [GO:0043209]; nucleolus [GO:0005730]; nucleus [GO:0005634]; plasma membrane [GO:0005886]; ruffle membrane [GO:0032587]	cortical actin cytoskeleton [GO:0030864]; cytoplasm [GO:0005737]; cytosol [GO:0005829]; myelin sheath [GO:0043209]; nucleolus [GO:0005730]; nucleus [GO:0005634]; plasma membrane [GO:0005886]; ruffle membrane [GO:0032587]; calmodulin binding [GO:0005516]; drug binding [GO:0008144]; GTP binding [GO:0005525]; GTPase activity [GO:0003924]; identical protein binding [GO:0042802]; kinase binding [GO:00…	calmodulin binding [GO:0005516]; drug binding [GO:0008144]; GTPase activity [GO:0003924]; GTP binding [GO:0005525]; identical protein binding [GO:0042802]; kinase binding [GO:0019900]; mRNA binding [GO:0003729]; protein kinase binding [GO:0019901]; translation elongation factor activity [GO:0003746]; tRNA binding [GO:0000049]	GO:0000049; GO:0003729; GO:0003746; GO:0003924; GO:0005516; GO:0005525; GO:0005634; GO:0005730; GO:0005737; GO:0005829; GO:0005886; GO:0006412; GO:0006414; GO:0008144; GO:0010942; GO:0010976; GO:0019900; GO:0019901; GO:0030864; GO:0032587; GO:0042802; GO:0043209; GO:0071364; GO:1900022; GO:1903427	RecName: Full=Elongation factor 1-alpha 1; Short=EF-1-alpha-1; AltName: Full=Elongation factor Tu; Short=EF-Tu; AltName: Full=Eukaryotic elongation factor 1 A-1; Short=eEF1A-1 - [EF1A1_MOUSE]	45.89	2	21	21	815.768	3.41559e+09	2.06954e+09	2.88657e+09	2.36912e+09	120	82	102	118	112	77	95	110	462	50.0821	9.01221
P47738	ALDH2	Aldehyde dehydrogenase, mitochondrial	FUNCTION: Is capable of converting retinaldehyde to retinoic acid.	SUBCELLULAR LOCATION: Mitochondrion matrix.	acetaldehyde metabolic process [GO:0006117]; behavioral response to ethanol [GO:0048149]; cellular detoxification of aldehyde [GO:0110095]; ethanol catabolic process [GO:0006068]; intrinsic apoptotic signaling pathway in response to oxidative stress [GO:0008631]; negative regulation of apoptotic process [GO:0043066]; regulation of inflammatory response [GO:0050727]; regulation of reactive oxygen …	mitochondrial matrix [GO:0005759]; mitochondrion [GO:0005739]	mitochondrial matrix [GO:0005759]; mitochondrion [GO:0005739]; aldehyde dehydrogenase (NAD+) activity [GO:0004029]; glyceraldehyde-3-phosphate dehydrogenase (NAD+) (non-phosphorylating) activity [GO:0043878]; identical protein binding [GO:0042802]; NAD binding [GO:0051287]; NADH binding [GO:0070404]; acetaldehyde metabolic process [GO:0006117]; behavioral response to ethanol [GO:0048149]; cellula…	aldehyde dehydrogenase (NAD+) activity [GO:0004029]; glyceraldehyde-3-phosphate dehydrogenase (NAD+) (non-phosphorylating) activity [GO:0043878]; identical protein binding [GO:0042802]; NAD binding [GO:0051287]; NADH binding [GO:0070404]	GO:0004029; GO:0005739; GO:0005759; GO:0006068; GO:0006117; GO:0008631; GO:0014070; GO:0042802; GO:0043066; GO:0043878; GO:0048149; GO:0050727; GO:0051287; GO:0070404; GO:0110095; GO:2000377	RecName: Full=Aldehyde dehydrogenase, mitochondrial; AltName: Full=AHD-M1; AltName: Full=ALDH class 2; AltName: Full=ALDH-E2; AltName: Full=ALDHI; Flags: Precursor - [ALDH2_MOUSE]	59.73	2	28	29	854.43	3.40318e+09	1.83107e+09	2.20438e+09	1.95364e+09	126	109	91	116	118	102	85	108	519	56.5018	7.62061
P63017	HSP7C	Heat shock cognate 71 kDa protein	FUNCTION: Molecular chaperone implicated in a wide variety of cellular processes, including protection of the proteome from stress, folding and transport of newly synthesized polypeptides, activation of proteolysis of misfolded proteins and the formation and dissociation of protein complexes. Plays a pivotal role in the protein quality control system, ensuring the correct folding of proteins, the…	SUBCELLULAR LOCATION: Cytoplasm {ECO:0000250}. Melanosome {ECO:0000250}. Nucleus, nucleolus {ECO:0000250}. Cell membrane {ECO:0000250}. Note=Localized in cytoplasmic mRNP granules containing untranslated mRNAs. Translocates rapidly from the cytoplasm to the nuclei, and especially to the nucleoli, upon heat shock (By similarity). {ECO:0000250}.	ATP metabolic process [GO:0046034]; axo-dendritic transport [GO:0008088]; cellular protein complex disassembly [GO:0043624]; cellular response to unfolded protein [GO:0034620]; chaperone cofactor-dependent protein refolding [GO:0051085]; chaperone-mediated autophagy [GO:0061684]; chaperone-mediated autophagy translocation complex disassembly [GO:1904764]; chaperone-mediated protein folding [GO:00…	asymmetric synapse [GO:0032279]; autophagosome [GO:0005776]; axon [GO:0030424]; cell surface [GO:0009986]; chaperone complex [GO:0101031]; cytoplasm [GO:0005737]; cytosol [GO:0005829]; dendrite [GO:0030425]; dendritic shaft [GO:0043198]; dendritic spine [GO:0043197]; extracellular exosome [GO:0070062]; glutamatergic synapse [GO:0098978]; glycinergic synapse [GO:0098690]; intermediate filament [GO…	asymmetric synapse [GO:0032279]; autophagosome [GO:0005776]; axon [GO:0030424]; cell surface [GO:0009986]; chaperone complex [GO:0101031]; cytoplasm [GO:0005737]; cytosol [GO:0005829]; dendrite [GO:0030425]; dendritic shaft [GO:0043198]; dendritic spine [GO:0043197]; extracellular exosome [GO:0070062]; glutamatergic synapse [GO:0098978]; glycinergic synapse [GO:0098690]; intermediate filament [GO…	A1 adenosine receptor binding [GO:0031686]; ADP binding [GO:0043531]; ATPase activity [GO:0016887]; ATPase activity, coupled [GO:0042623]; ATP binding [GO:0005524]; C3HC4-type RING finger domain binding [GO:0055131]; chaperone binding [GO:0051087]; clathrin-uncoating ATPase activity [GO:1990833]; enzyme binding [GO:0019899]; G protein-coupled receptor binding [GO:0001664]; heat shock protein bind…	GO:0000974; GO:0001664; GO:0001786; GO:0001916; GO:0001917; GO:0003723; GO:0005102; GO:0005524; GO:0005634; GO:0005681; GO:0005730; GO:0005737; GO:0005764; GO:0005765; GO:0005770; GO:0005776; GO:0005829; GO:0005874; GO:0005882; GO:0005886; GO:0006397; GO:0006457; GO:0006606; GO:0006986; GO:0008021; GO:0008088; GO:0008134; GO:0008380; GO:0009986; GO:0010628; GO:0010667; GO:0014069; GO:0016192; GO:…	RecName: Full=Heat shock cognate 71 kDa protein; AltName: Full=Heat shock 70 kDa protein 8 - [HSP7C_MOUSE]	54.95	2	24	28	827.367	1.68981e+09	9.97397e+08	2248791159	1.71647e+09	103	97	117	111	96	91	109	104	646	70.8272	5.51611
Q8VCH0	THIKB	3-ketoacyl-CoA thiolase B, peroxisomal		SUBCELLULAR LOCATION: Peroxisome {ECO:0000250|UniProtKB:P07871}.	fatty acid beta-oxidation [GO:0006635]; phenylacetate catabolic process [GO:0010124]	mitochondrion [GO:0005739]; peroxisome [GO:0005777]	mitochondrion [GO:0005739]; peroxisome [GO:0005777]; acetyl-CoA C-acetyltransferase activity [GO:0003985]; acetyl-CoA C-acyltransferase activity [GO:0003988]; acetyl-CoA C-myristoyltransferase activity [GO:0050633]; fatty acid beta-oxidation [GO:0006635]; phenylacetate catabolic process [GO:0010124]	acetyl-CoA C-acetyltransferase activity [GO:0003985]; acetyl-CoA C-acyltransferase activity [GO:0003988]; acetyl-CoA C-myristoyltransferase activity [GO:0050633]	GO:0003985; GO:0003988; GO:0005739; GO:0005777; GO:0006635; GO:0010124; GO:0050633	RecName: Full=3-ketoacyl-CoA thiolase B, peroxisomal; AltName: Full=Acetyl-CoA acyltransferase B; AltName: Full=Beta-ketothiolase B; AltName: Full=Peroxisomal 3-oxoacyl-CoA thiolase B; Flags: Precursor - [THIKB_MOUSE]	59.43	1	6	17	699.782	1.90418e+09	705578738	1.24138e+09	1992287636	89	79	83	111	83	74	77	104	424	43.9678	8.51416
P11499	HS90B	Heat shock protein HSP 90-beta	FUNCTION: Molecular chaperone that promotes the maturation, structural maintenance and proper regulation of specific target proteins involved for instance in cell cycle control and signal transduction. Undergoes a functional cycle that is linked to its ATPase activity. This cycle probably induces conformational changes in the client proteins, thereby causing their activation. Interacts dynamicall…	SUBCELLULAR LOCATION: Cytoplasm {ECO:0000269|PubMed:27496612, ECO:0000269|PubMed:27686098}. Melanosome {ECO:0000250|UniProtKB:P08238}. Nucleus {ECO:0000250|UniProtKB:P08238}. Secreted {ECO:0000250|UniProtKB:P08238}. Cell membrane {ECO:0000250|UniProtKB:P08238}. Note=Translocates with BIRC2 from the nucleus to the cytoplasm during differentiation. Secreted when associated with TGFB1 processed form…	axon extension [GO:0048675]; cellular response to drug [GO:0035690]; cellular response to heat [GO:0034605]; cellular response to interleukin-4 [GO:0071353]; cellular response to organic cyclic compound [GO:0071407]; central nervous system neuron axonogenesis [GO:0021955]; chaperone-mediated protein complex assembly [GO:0051131]; establishment of cell polarity [GO:0030010]; negative regulation of…	apical plasma membrane [GO:0016324]; aryl hydrocarbon receptor complex [GO:0034751]; axonal growth cone [GO:0044295]; basolateral plasma membrane [GO:0016323]; brush border membrane [GO:0031526]; cell surface [GO:0009986]; COP9 signalosome [GO:0008180]; cytoplasm [GO:0005737]; cytosol [GO:0005829]; dendritic growth cone [GO:0044294]; extracellular region [GO:0005576]; HSP90-CDC37 chaperone comple…	apical plasma membrane [GO:0016324]; aryl hydrocarbon receptor complex [GO:0034751]; axonal growth cone [GO:0044295]; basolateral plasma membrane [GO:0016323]; brush border membrane [GO:0031526]; cell surface [GO:0009986]; COP9 signalosome [GO:0008180]; cytoplasm [GO:0005737]; cytosol [GO:0005829]; dendritic growth cone [GO:0044294]; extracellular region [GO:0005576]; HSP90-CDC37 chaperone comple…	ATP binding [GO:0005524]; ATP-dependent protein binding [GO:0043008]; CTP binding [GO:0002135]; dATP binding [GO:0032564]; disordered domain specific binding [GO:0097718]; DNA polymerase binding [GO:0070182]; double-stranded RNA binding [GO:0003725]; drug binding [GO:0008144]; GTP binding [GO:0005525]; heat shock protein binding [GO:0031072]; histone deacetylase binding [GO:0042826]; histone meth…	GO:0001890; GO:0002134; GO:0002135; GO:0003725; GO:0005524; GO:0005525; GO:0005576; GO:0005634; GO:0005737; GO:0005739; GO:0005765; GO:0005829; GO:0005886; GO:0006457; GO:0007004; GO:0008144; GO:0008180; GO:0009651; GO:0009986; GO:0010033; GO:0016234; GO:0016323; GO:0016324; GO:0017098; GO:0019062; GO:0019900; GO:0019901; GO:0021955; GO:0030010; GO:0030235; GO:0030511; GO:0030911; GO:0031072; GO:…	RecName: Full=Heat shock protein HSP 90-beta; AltName: Full=Heat shock 84 kDa; Short=HSP 84; Short=HSP84; AltName: Full=Tumor-specific transplantation 84 kDa antigen; Short=TSTA - [HS90B_MOUSE]	55.94	1	24	37	697.849	1786414010	9.98646e+08	2.06539e+09	1.51377e+09	101	71	79	110	94	66	74	103	724	83.2291	5.03369
P26443	DHE3	Glutamate dehydrogenase 1, mitochondrial	FUNCTION: Mitochondrial glutamate dehydrogenase that converts L-glutamate into alpha-ketoglutarate. Plays a key role in glutamine anaplerosis by producing alpha-ketoglutarate, an important intermediate in the tricarboxylic acid cycle. May be involved in learning and memory reactions by increasing the turnover of the excitatory neurotransmitter glutamate. {ECO:0000269|PubMed:23663782}.	SUBCELLULAR LOCATION: Mitochondrion matrix.	cerebellum development [GO:0021549]; glutamate biosynthetic process [GO:0006537]; glutamate catabolic process [GO:0006538]; glutamine metabolic process [GO:0006541]; long-term memory [GO:0007616]; positive regulation of insulin secretion [GO:0032024]; response to aluminum ion [GO:0010044]; tricarboxylic acid metabolic process [GO:0072350]	cytoplasm [GO:0005737]; mitochondrial inner membrane [GO:0005743]; mitochondrial matrix [GO:0005759]; mitochondrion [GO:0005739]	cytoplasm [GO:0005737]; mitochondrial inner membrane [GO:0005743]; mitochondrial matrix [GO:0005759]; mitochondrion [GO:0005739]; ADP binding [GO:0043531]; ATP binding [GO:0005524]; enzyme binding [GO:0019899]; glutamate dehydrogenase (NAD+) activity [GO:0004352]; glutamate dehydrogenase [NAD(P)+] activity [GO:0004353]; GTP binding [GO:0005525]; leucine binding [GO:0070728]; NAD+ binding [GO:0070…	ADP binding [GO:0043531]; ATP binding [GO:0005524]; enzyme binding [GO:0019899]; glutamate dehydrogenase (NAD+) activity [GO:0004352]; glutamate dehydrogenase [NAD(P)+] activity [GO:0004353]; GTP binding [GO:0005525]; leucine binding [GO:0070728]; NAD+ binding [GO:0070403]	GO:0004352; GO:0004353; GO:0005524; GO:0005525; GO:0005737; GO:0005739; GO:0005743; GO:0005759; GO:0006537; GO:0006538; GO:0006541; GO:0007616; GO:0010044; GO:0019899; GO:0021549; GO:0032024; GO:0043531; GO:0070403; GO:0070728; GO:0072350	RecName: Full=Glutamate dehydrogenase 1, mitochondrial; Short=GDH 1; Flags: Precursor - [DHE3_MOUSE]	48.39	2	25	25	860.23	2.41966e+09	1715024384	2295247773	2.019e+09	114	108	114	109	106	101	106	102	558	61.2982	8.00146
P00329	ADH1	Alcohol dehydrogenase 1		SUBCELLULAR LOCATION: Cytoplasm.	acetaldehyde biosynthetic process [GO:0046186]; behavioral response to ethanol [GO:0048149]; ethanol catabolic process [GO:0006068]; ethanol oxidation [GO:0006069]; response to retinoic acid [GO:0032526]; response to steroid hormone [GO:0048545]; response to testosterone [GO:0033574]; retinoic acid metabolic process [GO:0042573]; retinoid metabolic process [GO:0001523]; retinol metabolic process …	cytosol [GO:0005829]; mitochondrion [GO:0005739]; nucleoplasm [GO:0005654]; plasma membrane [GO:0005886]	cytosol [GO:0005829]; mitochondrion [GO:0005739]; nucleoplasm [GO:0005654]; plasma membrane [GO:0005886]; alcohol dehydrogenase (NAD+) activity [GO:0004022]; alcohol dehydrogenase activity, zinc-dependent [GO:0004024]; drug binding [GO:0008144]; ethanol binding [GO:0035276]; identical protein binding [GO:0042802]; NAD binding [GO:0051287]; retinol dehydrogenase activity [GO:0004745]; zinc ion bin…	alcohol dehydrogenase (NAD+) activity [GO:0004022]; alcohol dehydrogenase activity, zinc-dependent [GO:0004024]; drug binding [GO:0008144]; ethanol binding [GO:0035276]; identical protein binding [GO:0042802]; NAD binding [GO:0051287]; retinol dehydrogenase activity [GO:0004745]; zinc ion binding [GO:0008270]	GO:0001523; GO:0004022; GO:0004024; GO:0004745; GO:0005654; GO:0005739; GO:0005829; GO:0005886; GO:0006068; GO:0006069; GO:0008144; GO:0008270; GO:0032526; GO:0033574; GO:0035276; GO:0042572; GO:0042573; GO:0042802; GO:0046186; GO:0048149; GO:0048545; GO:0051287	RecName: Full=Alcohol dehydrogenase 1; AltName: Full=ADH-A2; AltName: Full=Alcohol dehydrogenase A subunit - [ADH1_MOUSE]	57.87	1	18	18	703.648	9.20574e+09	4.01483e+09	5.88793e+09	5.74459e+09	89	106	60	109	83	99	56	102	375	39.7456	8.104
P08113	ENPL	Endoplasmin	FUNCTION: Molecular chaperone that functions in the processing and transport of secreted proteins (PubMed:20865800). When associated with CNPY3, required for proper folding of Toll-like receptors (PubMed:20865800). Functions in endoplasmic reticulum associated degradation (ERAD) (By similarity). Has ATPase activity (PubMed:20865800). {ECO:0000250|UniProtKB:P14625, ECO:0000269|PubMed:20865800}.	SUBCELLULAR LOCATION: Endoplasmic reticulum lumen {ECO:0000269|PubMed:20865800}. Sarcoplasmic reticulum lumen {ECO:0000250|UniProtKB:P41148}. Melanosome {ECO:0000250|UniProtKB:P14625}.	actin rod assembly [GO:0031247]; cellular response to ATP [GO:0071318]; negative regulation of apoptotic process [GO:0043066]; protein folding [GO:0006457]; regulation of phosphoprotein phosphatase activity [GO:0043666]; response to hypoxia [GO:0001666]; retrograde protein transport, ER to cytosol [GO:0030970]; ubiquitin-dependent ERAD pathway [GO:0030433]	cytosol [GO:0005829]; endoplasmic reticulum [GO:0005783]; endoplasmic reticulum chaperone complex [GO:0034663]; endoplasmic reticulum lumen [GO:0005788]; endoplasmic reticulum membrane [GO:0005789]; extracellular region [GO:0005576]; melanosome [GO:0042470]; midbody [GO:0030496]; perinuclear region of cytoplasm [GO:0048471]; plasma membrane [GO:0005886]; protein-containing complex [GO:0032991]; s…	cytosol [GO:0005829]; endoplasmic reticulum [GO:0005783]; endoplasmic reticulum chaperone complex [GO:0034663]; endoplasmic reticulum lumen [GO:0005788]; endoplasmic reticulum membrane [GO:0005789]; extracellular region [GO:0005576]; melanosome [GO:0042470]; midbody [GO:0030496]; perinuclear region of cytoplasm [GO:0048471]; plasma membrane [GO:0005886]; protein-containing complex [GO:0032991]; s…	ATP binding [GO:0005524]; low-density lipoprotein particle receptor binding [GO:0050750]; protein phosphatase binding [GO:0019903]; RNA binding [GO:0003723]; unfolded protein binding [GO:0051082]	GO:0001666; GO:0003723; GO:0005524; GO:0005576; GO:0005783; GO:0005788; GO:0005789; GO:0005790; GO:0005829; GO:0005886; GO:0006457; GO:0019903; GO:0030433; GO:0030496; GO:0030970; GO:0031247; GO:0032991; GO:0033018; GO:0034663; GO:0042470; GO:0043066; GO:0043666; GO:0048471; GO:0050750; GO:0051082; GO:0071318	RecName: Full=Endoplasmin; AltName: Full=94 kDa glucose-regulated protein; Short=GRP-94; AltName: Full=Endoplasmic reticulum resident protein 99; Short=ERp99; AltName: Full=Heat shock protein 90 kDa beta member 1; AltName: Full=Polymorphic tumor rejection antigen 1; AltName: Full=Tumor rejection antigen gp96; Flags: Precursor - [ENPL_MOUSE]	50.37	1	38	39	715.247	1.42898e+09	8.3855e+08	1.71078e+09	1.21318e+09	91	73	98	108	85	68	91	101	802	92.4183	4.81787
Q05920	PYC	Pyruvate carboxylase, mitochondrial	FUNCTION: Pyruvate carboxylase catalyzes a 2-step reaction, involving the ATP-dependent carboxylation of the covalently attached biotin in the first step and the transfer of the carboxyl group to pyruvate in the second. Catalyzes in a tissue specific manner, the initial reactions of glucose (liver, kidney) and lipid (adipose tissue, liver, brain) synthesis from pyruvate.	SUBCELLULAR LOCATION: Mitochondrion matrix.	gluconeogenesis [GO:0006094]; lipid metabolic process [GO:0006629]; negative regulation of gene expression [GO:0010629]; oxaloacetate metabolic process [GO:0006107]; positive regulation by host of viral process [GO:0044794]; positive regulation by host of viral release from host cell [GO:0044791]; positive regulation of phospholipid biosynthetic process [GO:0071073]; pyruvate metabolic process [G…	cytoplasm [GO:0005737]; mitochondrial inner membrane [GO:0005743]; mitochondrial matrix [GO:0005759]; mitochondrion [GO:0005739]	cytoplasm [GO:0005737]; mitochondrial inner membrane [GO:0005743]; mitochondrial matrix [GO:0005759]; mitochondrion [GO:0005739]; ATP binding [GO:0005524]; biotin binding [GO:0009374]; carboxylic acid binding [GO:0031406]; identical protein binding [GO:0042802]; metal ion binding [GO:0046872]; pyruvate carboxylase activity [GO:0004736]; gluconeogenesis [GO:0006094]; lipid metabolic process [GO:00…	ATP binding [GO:0005524]; biotin binding [GO:0009374]; carboxylic acid binding [GO:0031406]; identical protein binding [GO:0042802]; metal ion binding [GO:0046872]; pyruvate carboxylase activity [GO:0004736]	GO:0004736; GO:0005524; GO:0005737; GO:0005739; GO:0005743; GO:0005759; GO:0006090; GO:0006094; GO:0006107; GO:0006629; GO:0009374; GO:0010629; GO:0019074; GO:0031406; GO:0042802; GO:0044791; GO:0044794; GO:0046872; GO:0071073	RecName: Full=Pyruvate carboxylase, mitochondrial; AltName: Full=Pyruvic carboxylase; Short=PCB; Flags: Precursor - [PYC_MOUSE]	51.78	1	51	51	866.029	1.13077e+09	7.13002e+08	7.20889e+08	6.52652e+08	135	114	91	108	126	106	85	101	1178	129.602	6.7124
Q99LB7	SARDH	Sarcosine dehydrogenase, mitochondrial		SUBCELLULAR LOCATION: Mitochondrion matrix {ECO:0000250}.	sarcosine catabolic process [GO:1901053]; tetrahydrofolate interconversion [GO:0035999]	cytoplasm [GO:0005737]; mitochondrial matrix [GO:0005759]; mitochondrion [GO:0005739]	cytoplasm [GO:0005737]; mitochondrial matrix [GO:0005759]; mitochondrion [GO:0005739]; flavin adenine dinucleotide binding [GO:0050660]; folic acid binding [GO:0005542]; oxidoreductase activity [GO:0016491]; sarcosine dehydrogenase activity [GO:0008480]; sarcosine catabolic process [GO:1901053]; tetrahydrofolate interconversion [GO:0035999]	flavin adenine dinucleotide binding [GO:0050660]; folic acid binding [GO:0005542]; oxidoreductase activity [GO:0016491]; sarcosine dehydrogenase activity [GO:0008480]	GO:0005542; GO:0005737; GO:0005739; GO:0005759; GO:0008480; GO:0016491; GO:0035999; GO:0050660; GO:1901053	RecName: Full=Sarcosine dehydrogenase, mitochondrial; Short=SarDH; Flags: Precursor - [SARDH_MOUSE]	57.34	1	41	41	896.958	1.25376e+09	9.65617e+08	956595812	7.67853e+08	133	128	97	106	124	119	91	99	919	101.618	6.7417
Q61176	ARGI1	Arginase-1	FUNCTION: Key element of the urea cycle converting L-arginine to urea and L-ornithine, which is further metabolized into metabolites proline and polyamides that drive collagen synthesis and bioenergetic pathways critical for cell proliferation, respectively; the urea cycle takes place primarily in the liver and, to a lesser extent, in the kidneys. {ECO:0000305}.; FUNCTION: Functions in L-arginine…	SUBCELLULAR LOCATION: Cytoplasm {ECO:0000250|UniProtKB:P05089}. Cytoplasmic granule {ECO:0000250|UniProtKB:P05089}.	adaptive immune response [GO:0002250]; aging [GO:0007568]; arginine catabolic process to ornithine [GO:0019547]; arginine metabolic process [GO:0006525]; cellular response to dexamethasone stimulus [GO:0071549]; cellular response to glucagon stimulus [GO:0071377]; cellular response to hydrogen peroxide [GO:0070301]; cellular response to interleukin-4 [GO:0071353]; cellular response to lipopolysac…	cytoplasm [GO:0005737]; cytosol [GO:0005829]; extracellular space [GO:0005615]; mitochondrial outer membrane [GO:0005741]; neuronal cell body [GO:0043025]; neuron projection [GO:0043005]	cytoplasm [GO:0005737]; cytosol [GO:0005829]; extracellular space [GO:0005615]; mitochondrial outer membrane [GO:0005741]; neuron projection [GO:0043005]; neuronal cell body [GO:0043025]; arginase activity [GO:0004053]; identical protein binding [GO:0042802]; manganese ion binding [GO:0030145]; adaptive immune response [GO:0002250]; aging [GO:0007568]; arginine catabolic process to ornithine [GO:…	arginase activity [GO:0004053]; identical protein binding [GO:0042802]; manganese ion binding [GO:0030145]	GO:0000050; GO:0001889; GO:0001938; GO:0002250; GO:0004053; GO:0005615; GO:0005737; GO:0005741; GO:0005829; GO:0006525; GO:0007568; GO:0009635; GO:0010042; GO:0010043; GO:0010269; GO:0010963; GO:0014075; GO:0019547; GO:0030145; GO:0030324; GO:0032964; GO:0033189; GO:0033197; GO:0042130; GO:0042802; GO:0042832; GO:0043005; GO:0043025; GO:0043200; GO:0045087; GO:0046007; GO:0046686; GO:0048678; GO:…	RecName: Full=Arginase-1; AltName: Full=Liver-type arginase; AltName: Full=Type I arginase - [ARGI1_MOUSE]	71.21	1	19	19	788.028	3.21566e+09	1.67952e+09	1.97091e+09	2.03307e+09	97	89	96	106	100	92	99	109	323	34.7862	7.00537
P17182	ENOA	Alpha-enolase	FUNCTION: Glycolytic enzyme the catalyzes the conversion of 2-phosphoglycerate to phosphoenolpyruvate. In addition to glycolysis, involved in various processes such as growth control, hypoxia tolerance and allergic responses. May also function in the intravascular and pericellular fibrinolytic system due to its ability to serve as a receptor and activator of plasminogen on the cell surface of sev…	SUBCELLULAR LOCATION: Cytoplasm {ECO:0000250}. Cell membrane {ECO:0000250}. Note=Can translocate to the plasma membrane in either the homodimeric (alpha/alpha) or heterodimeric (alpha/gamma) form (By similarity). ENO1 is localized to the M-band. {ECO:0000250, ECO:0000269|PubMed:11229603}.	canonical glycolysis [GO:0061621]; cellular response to interleukin-7 [GO:0098761]; glycolytic process [GO:0006096]; in utero embryonic development [GO:0001701]; positive regulation of binding [GO:0051099]	cell cortex region [GO:0099738]; cell surface [GO:0009986]; cytoplasm [GO:0005737]; cytosol [GO:0005829]; extrinsic component of plasma membrane [GO:0019897]; growth cone [GO:0030426]; membrane [GO:0016020]; membrane raft [GO:0045121]; myelin sheath [GO:0043209]; neuron projection [GO:0043005]; phosphopyruvate hydratase complex [GO:0000015]; plasma membrane [GO:0005886]; synaptic membrane [GO:009…	cell cortex region [GO:0099738]; cell surface [GO:0009986]; cytoplasm [GO:0005737]; cytosol [GO:0005829]; extrinsic component of plasma membrane [GO:0019897]; growth cone [GO:0030426]; membrane [GO:0016020]; membrane raft [GO:0045121]; myelin sheath [GO:0043209]; neuron projection [GO:0043005]; phosphopyruvate hydratase complex [GO:0000015]; plasma membrane [GO:0005886]; synaptic membrane [GO:009…	DNA-binding transcription repressor activity, RNA polymerase II-specific [GO:0001227]; enzyme binding [GO:0019899]; GTPase binding [GO:0051020]; heat shock protein binding [GO:0031072]; identical protein binding [GO:0042802]; magnesium ion binding [GO:0000287]; phosphopyruvate hydratase activity [GO:0004634]; protein-containing complex binding [GO:0044877]; protein homodimerization activity [GO:0…	GO:0000015; GO:0000287; GO:0000977; GO:0001227; GO:0001701; GO:0003723; GO:0004634; GO:0005737; GO:0005829; GO:0005886; GO:0006096; GO:0009986; GO:0016020; GO:0019897; GO:0019899; GO:0030426; GO:0031072; GO:0042802; GO:0042803; GO:0043005; GO:0043209; GO:0044877; GO:0045121; GO:0051020; GO:0051099; GO:0061621; GO:0097060; GO:0098761; GO:0099738	RecName: Full=Alpha-enolase; AltName: Full=2-phospho-D-glycerate hydro-lyase; AltName: Full=Enolase 1; AltName: Full=Non-neural enolase; Short=NNE - [ENOA_MOUSE]	74.42	3	24	24	785.997	2.42186e+09	1.05724e+09	2.00235e+09	1.85792e+09	105	84	93	105	108	87	96	108	434	47.1112	6.80029
Q03265	ATPA	ATP synthase subunit alpha, mitochondrial	FUNCTION: Mitochondrial membrane ATP synthase (F(1)F(0) ATP synthase or Complex V) produces ATP from ADP in the presence of a proton gradient across the membrane which is generated by electron transport complexes of the respiratory chain. F-type ATPases consist of two structural domains, F(1) - containing the extramembraneous catalytic core, and F(0) - containing the membrane proton channel, link…	SUBCELLULAR LOCATION: Mitochondrion inner membrane {ECO:0000250|UniProtKB:P19483}; Peripheral membrane protein {ECO:0000250|UniProtKB:P19483}; Matrix side {ECO:0000250|UniProtKB:P19483}. Cell membrane {ECO:0000250|UniProtKB:P25705}; Peripheral membrane protein {ECO:0000250|UniProtKB:P25705}; Extracellular side {ECO:0000250|UniProtKB:P25705}. Note=Colocalizes with HRG on the cell surface of T-cell…	ATP biosynthetic process [GO:0006754]; ATP metabolic process [GO:0046034]; ATP synthesis coupled proton transport [GO:0015986]; lipid metabolic process [GO:0006629]; mitochondrial ATP synthesis coupled proton transport [GO:0042776]; negative regulation of endothelial cell proliferation [GO:0001937]; positive regulation of blood vessel endothelial cell migration [GO:0043536]	cell surface [GO:0009986]; COP9 signalosome [GO:0008180]; membrane [GO:0016020]; membrane raft [GO:0045121]; mitochondrial inner membrane [GO:0005743]; mitochondrial proton-transporting ATP synthase complex [GO:0005753]; mitochondrial proton-transporting ATP synthase complex, catalytic core F(1) [GO:0000275]; mitochondrion [GO:0005739]; myelin sheath [GO:0043209]; nucleus [GO:0005634]; plasma mem…	cell surface [GO:0009986]; COP9 signalosome [GO:0008180]; membrane [GO:0016020]; membrane raft [GO:0045121]; mitochondrial inner membrane [GO:0005743]; mitochondrial proton-transporting ATP synthase complex [GO:0005753]; mitochondrial proton-transporting ATP synthase complex, catalytic core F(1) [GO:0000275]; mitochondrion [GO:0005739]; myelin sheath [GO:0043209]; nucleus [GO:0005634]; plasma mem…	ADP binding [GO:0043531]; angiostatin binding [GO:0043532]; ATP binding [GO:0005524]; MHC class I protein binding [GO:0042288]; protease binding [GO:0002020]; proton-transporting ATP synthase activity, rotational mechanism [GO:0046933]	GO:0000275; GO:0001937; GO:0002020; GO:0005524; GO:0005634; GO:0005739; GO:0005743; GO:0005753; GO:0005886; GO:0006629; GO:0006754; GO:0008180; GO:0009986; GO:0015986; GO:0016020; GO:0042288; GO:0042776; GO:0043209; GO:0043531; GO:0043532; GO:0043536; GO:0045121; GO:0045259; GO:0045261; GO:0046034; GO:0046933	RecName: Full=ATP synthase subunit alpha, mitochondrial; AltName: Full=ATP synthase F1 subunit alpha; Flags: Precursor - [ATPA_MOUSE]	54.97	1	26	26	832.71	3.11997e+09	1.84851e+09	2241627506	1.74979e+09	113	111	81	105	117	114	84	108	553	59.7156	9.18799
P54869	HMCS2	Hydroxymethylglutaryl-CoA synthase, mitochondrial	FUNCTION: Catalyzes the first irreversible step in ketogenesis, condensing acetyl-CoA to acetoacetyl-CoA to form HMG-CoA, which is converted by HMG-CoA reductase (HMGCR) into mevalonate. {ECO:0000269|PubMed:24315375}.	SUBCELLULAR LOCATION: Mitochondrion {ECO:0000250|UniProtKB:P22791}.	acetyl-CoA metabolic process [GO:0006084]; cholesterol biosynthetic process [GO:0006695]; farnesyl diphosphate biosynthetic process, mevalonate pathway [GO:0010142]	mitochondrial inner membrane [GO:0005743]; mitochondrial matrix [GO:0005759]; mitochondrion [GO:0005739]	mitochondrial inner membrane [GO:0005743]; mitochondrial matrix [GO:0005759]; mitochondrion [GO:0005739]; hydroxymethylglutaryl-CoA synthase activity [GO:0004421]; acetyl-CoA metabolic process [GO:0006084]; cholesterol biosynthetic process [GO:0006695]; farnesyl diphosphate biosynthetic process, mevalonate pathway [GO:0010142]	hydroxymethylglutaryl-CoA synthase activity [GO:0004421]	GO:0004421; GO:0005739; GO:0005743; GO:0005759; GO:0006084; GO:0006695; GO:0010142	RecName: Full=Hydroxymethylglutaryl-CoA synthase, mitochondrial; Short=HMG-CoA synthase; AltName: Full=3-hydroxy-3-methylglutaryl coenzyme A synthase; Flags: Precursor - [HMCS2_MOUSE]	52.36	1	22	23	834.741	3.06896e+09	2.10128e+09	3499408230	2.49126e+09	117	87	103	104	121	90	106	107	508	56.7865	8.41162
P50247	SAHH	Adenosylhomocysteinase	FUNCTION: Adenosylhomocysteine is a competitive inhibitor of S-adenosyl-L-methionine-dependent methyl transferase reactions; therefore adenosylhomocysteinase may play a key role in the control of methylations via regulation of the intracellular concentration of adenosylhomocysteine.	SUBCELLULAR LOCATION: Cytoplasm. Melanosome {ECO:0000250}.	chronic inflammatory response to antigenic stimulus [GO:0002439]; circadian sleep/wake cycle [GO:0042745]; one-carbon metabolic process [GO:0006730]; response to nutrient [GO:0007584]; S-adenosylhomocysteine catabolic process [GO:0019510]; S-adenosylmethionine cycle [GO:0033353]	cytosol [GO:0005829]; melanosome [GO:0042470]; neuron projection [GO:0043005]; nucleus [GO:0005634]	cytosol [GO:0005829]; melanosome [GO:0042470]; neuron projection [GO:0043005]; nucleus [GO:0005634]; adenosylhomocysteinase activity [GO:0004013]; adenyl nucleotide binding [GO:0030554]; copper ion binding [GO:0005507]; identical protein binding [GO:0042802]; NAD binding [GO:0051287]; protein self-association [GO:0043621]; chronic inflammatory response to antigenic stimulus [GO:0002439]; circadia…	adenosylhomocysteinase activity [GO:0004013]; adenyl nucleotide binding [GO:0030554]; copper ion binding [GO:0005507]; identical protein binding [GO:0042802]; NAD binding [GO:0051287]; protein self-association [GO:0043621]	GO:0002439; GO:0004013; GO:0005507; GO:0005634; GO:0005829; GO:0006730; GO:0007584; GO:0019510; GO:0030554; GO:0033353; GO:0042470; GO:0042745; GO:0042802; GO:0043005; GO:0043621; GO:0051287	RecName: Full=Adenosylhomocysteinase; Short=AdoHcyase; AltName: Full=CUBP; AltName: Full=Liver copper-binding protein; AltName: Full=S-adenosyl-L-homocysteine hydrolase - [SAHH_MOUSE]	63.43	1	24	26	759.594	3.14873e+09	2.11676e+09	2.51152e+09	1.89231e+09	109	89	73	103	112	92	75	106	432	47.6573	6.53662
P63038	CH60	60 kDa heat shock protein, mitochondrial	FUNCTION: Chaperonin implicated in mitochondrial protein import and macromolecular assembly. Together with Hsp10, facilitates the correct folding of imported proteins. May also prevent misfolding and promote the refolding and proper assembly of unfolded polypeptides generated under stress conditions in the mitochondrial matrix. The functional units of these chaperonins consist of heptameric rings…	SUBCELLULAR LOCATION: Mitochondrion matrix {ECO:0000250|UniProtKB:P10809}.	de novo' protein folding [GO:0006458]; activation of cysteine-type endopeptidase activity involved in apoptotic process [GO:0006919]; apoptotic mitochondrial changes [GO:0008637]; B cell activation [GO:0042113]; B cell cytokine production [GO:0002368]; B cell proliferation [GO:0042100]; cellular response to heat [GO:0034605]; cellular response to interleukin-7 [GO:0098761]; interaction with symbi…	cell surface [GO:0009986]; clathrin-coated pit [GO:0005905]; coated vesicle [GO:0030135]; cytoplasm [GO:0005737]; cytosol [GO:0005829]; early endosome [GO:0005769]; extracellular exosome [GO:0070062]; extracellular space [GO:0005615]; Golgi apparatus [GO:0005794]; intracellular membrane-bounded organelle [GO:0043231]; lipopolysaccharide receptor complex [GO:0046696]; membrane [GO:0016020]; membra…	cell surface [GO:0009986]; clathrin-coated pit [GO:0005905]; coated vesicle [GO:0030135]; cytoplasm [GO:0005737]; cytosol [GO:0005829]; early endosome [GO:0005769]; extracellular exosome [GO:0070062]; extracellular space [GO:0005615]; Golgi apparatus [GO:0005794]; intracellular membrane-bounded organelle [GO:0043231]; lipopolysaccharide receptor complex [GO:0046696]; membrane [GO:0016020]; membra…	apolipoprotein A-I binding [GO:0034186]; apolipoprotein binding [GO:0034185]; ATP binding [GO:0005524]; chaperone binding [GO:0051087]; double-stranded RNA binding [GO:0003725]; enzyme binding [GO:0019899]; high-density lipoprotein particle binding [GO:0008035]; insulin binding [GO:0043559]; isomerase activity [GO:0016853]; lipopolysaccharide binding [GO:0001530]; modification-dependent protein b…	GO:0001530; GO:0001666; GO:0002020; GO:0002039; GO:0002368; GO:0002755; GO:0002842; GO:0002931; GO:0003725; GO:0005524; GO:0005615; GO:0005737; GO:0005739; GO:0005743; GO:0005759; GO:0005769; GO:0005782; GO:0005791; GO:0005794; GO:0005829; GO:0005886; GO:0005905; GO:0006458; GO:0006919; GO:0006986; GO:0008035; GO:0008637; GO:0009409; GO:0009986; GO:0014823; GO:0016020; GO:0016853; GO:0019899; GO:…	RecName: Full=60 kDa heat shock protein, mitochondrial; AltName: Full=60 kDa chaperonin; AltName: Full=Chaperonin 60; Short=CPN60; AltName: Full=HSP-65; AltName: Full=Heat shock protein 60; Short=HSP-60; Short=Hsp60; AltName: Full=Mitochondrial matrix protein P1; Flags: Precursor - [CH60_MOUSE]	61.61	1	35	35	788.028	1.76531e+09	9.44182e+08	1.36821e+09	1.398e+09	105	88	96	99	108	91	99	102	573	60.9174	6.17627
Q921I1	TRFE	Serotransferrin	FUNCTION: Transferrins are iron binding transport proteins which can bind two Fe(3+) ions in association with the binding of an anion, usually bicarbonate. It is responsible for the transport of iron from sites of absorption and heme degradation to those of storage and utilization. Serum transferrin may also have a further role in stimulating cell proliferation.	SUBCELLULAR LOCATION: Secreted.	actin filament organization [GO:0007015]; activation of JUN kinase activity [GO:0007257]; cellular iron ion homeostasis [GO:0006879]; cellular response to iron ion [GO:0071281]; ERK1 and ERK2 cascade [GO:0070371]; iron ion transport [GO:0006826]; osteoclast differentiation [GO:0030316]; positive regulation of bone resorption [GO:0045780]; positive regulation of cell motility [GO:2000147]; positiv…	apical plasma membrane [GO:0016324]; basal part of cell [GO:0045178]; basal plasma membrane [GO:0009925]; basement membrane [GO:0005604]; cell [GO:0005623]; cell surface [GO:0009986]; cell tip [GO:0051286]; clathrin-coated pit [GO:0005905]; cytoplasmic vesicle [GO:0031410]; dense body [GO:0097433]; early endosome [GO:0005769]; endocytic vesicle [GO:0030139]; endosome [GO:0005768]; extracellular r…	apical plasma membrane [GO:0016324]; basal part of cell [GO:0045178]; basal plasma membrane [GO:0009925]; basement membrane [GO:0005604]; cell [GO:0005623]; cell surface [GO:0009986]; cell tip [GO:0051286]; clathrin-coated pit [GO:0005905]; cytoplasmic vesicle [GO:0031410]; dense body [GO:0097433]; early endosome [GO:0005769]; endocytic vesicle [GO:0030139]; endosome [GO:0005768]; extracellular r…	ferric iron binding [GO:0008199]; ferrous iron binding [GO:0008198]; iron chaperone activity [GO:0034986]; transferrin receptor binding [GO:1990459]	GO:0005576; GO:0005604; GO:0005615; GO:0005623; GO:0005768; GO:0005769; GO:0005770; GO:0005905; GO:0006826; GO:0006879; GO:0007015; GO:0007257; GO:0008198; GO:0008199; GO:0009617; GO:0009925; GO:0009986; GO:0016020; GO:0016324; GO:0030120; GO:0030139; GO:0030316; GO:0031232; GO:0031410; GO:0031643; GO:0031982; GO:0034756; GO:0034986; GO:0042327; GO:0045178; GO:0045780; GO:0045893; GO:0048260; GO:…	RecName: Full=Serotransferrin; Short=Transferrin; AltName: Full=Beta-1 metal-binding globulin; AltName: Full=Siderophilin; Flags: Precursor - [TRFE_MOUSE]	60.55	1	38	38	706.788	7.71443e+08	4.75022e+08	6.09624e+08	6.13607e+08	85	88	76	99	88	91	78	102	697	76.6737	7.18115
Q64458	CP2CT	Cytochrome P450 2C29	FUNCTION: Metabolizes arachidonic acid to produce 14,15-cis-epoxyeicosatrienoic acid (EET).	SUBCELLULAR LOCATION: Endoplasmic reticulum membrane; Peripheral membrane protein. Microsome membrane; Peripheral membrane protein.	epoxygenase P450 pathway [GO:0019373]; exogenous drug catabolic process [GO:0042738]; organic acid metabolic process [GO:0006082]; oxidation-reduction process [GO:0055114]; xenobiotic metabolic process [GO:0006805]	cytoplasm [GO:0005737]; endoplasmic reticulum membrane [GO:0005789]; intracellular membrane-bounded organelle [GO:0043231]	cytoplasm [GO:0005737]; endoplasmic reticulum membrane [GO:0005789]; intracellular membrane-bounded organelle [GO:0043231]; arachidonic acid epoxygenase activity [GO:0008392]; aromatase activity [GO:0070330]; caffeine oxidase activity [GO:0034875]; estrogen 16-alpha-hydroxylase activity [GO:0101020]; heme binding [GO:0020037]; iron ion binding [GO:0005506]; monooxygenase activity [GO:0004497]; ox…	arachidonic acid epoxygenase activity [GO:0008392]; aromatase activity [GO:0070330]; caffeine oxidase activity [GO:0034875]; estrogen 16-alpha-hydroxylase activity [GO:0101020]; heme binding [GO:0020037]; iron ion binding [GO:0005506]; monooxygenase activity [GO:0004497]; oxidoreductase activity, acting on paired donors, with incorporation or reduction of molecular oxygen, reduced flavin or flavo…	GO:0004497; GO:0005506; GO:0005737; GO:0005789; GO:0006082; GO:0006805; GO:0008392; GO:0008395; GO:0008401; GO:0016712; GO:0019373; GO:0020037; GO:0034875; GO:0042738; GO:0043231; GO:0055114; GO:0070330; GO:0101020	RecName: Full=Cytochrome P450 2C29; AltName: Full=Aldehyde oxygenase; AltName: Full=CYPIIC29; AltName: Full=Cytochrome P-450 MUT-2 - [CP2CT_MOUSE]	67.76	2	19	29	605.238	1.31892e+09	1.03691e+09	1.49964e+09	1.4927e+09	88	58	53	99	91	60	55	102	490	55.6798	8.29443
P02088	HBB1	Hemoglobin subunit beta-1	FUNCTION: Involved in oxygen transport from the lung to the various peripheral tissues.		cellular oxidant detoxification [GO:0098869]; erythrocyte development [GO:0048821]; hemopoiesis [GO:0030097]; hydrogen peroxide catabolic process [GO:0042744]; oxygen transport [GO:0015671]; regulation of eIF2 alpha phosphorylation by heme [GO:0010999]	haptoglobin-hemoglobin complex [GO:0031838]; hemoglobin complex [GO:0005833]; myelin sheath [GO:0043209]	haptoglobin-hemoglobin complex [GO:0031838]; hemoglobin complex [GO:0005833]; myelin sheath [GO:0043209]; heme binding [GO:0020037]; hemoglobin alpha binding [GO:0031721]; metal ion binding [GO:0046872]; organic acid binding [GO:0043177]; oxygen binding [GO:0019825]; oxygen carrier activity [GO:0005344]; cellular oxidant detoxification [GO:0098869]; erythrocyte development [GO:0048821]; hemopoies…	heme binding [GO:0020037]; hemoglobin alpha binding [GO:0031721]; metal ion binding [GO:0046872]; organic acid binding [GO:0043177]; oxygen binding [GO:0019825]; oxygen carrier activity [GO:0005344]	GO:0005344; GO:0005833; GO:0010999; GO:0015671; GO:0019825; GO:0020037; GO:0030097; GO:0031721; GO:0031838; GO:0042744; GO:0043177; GO:0043209; GO:0046872; GO:0048821; GO:0098869	RecName: Full=Hemoglobin subunit beta-1; AltName: Full=Beta-1-globin; AltName: Full=Hemoglobin beta-1 chain; AltName: Full=Hemoglobin beta-major chain - [HBB1_MOUSE]	54.42	2	3	7	802.245	1.49493e+10	4.64894e+09	1.47873e+10	8.31977e+09	94	74	130	97	97	76	134	100	147	15.8301	7.6499
O35945	AL1A7	Aldehyde dehydrogenase, cytosolic 1	FUNCTION: Can oxidize benzaldehyde, propionaldehyde and acetaldehyde (By similarity). No detectable activity with retinal. {ECO:0000250, ECO:0000269|PubMed:10191271}.	SUBCELLULAR LOCATION: Cytoplasm {ECO:0000250|UniProtKB:P13601}.	ethanol catabolic process [GO:0006068]	cytoplasm [GO:0005737]	cytoplasm [GO:0005737]; aldehyde dehydrogenase (NAD+) activity [GO:0004029]; benzaldehyde dehydrogenase (NAD+) activity [GO:0018479]; glyceraldehyde-3-phosphate dehydrogenase (NAD+) (non-phosphorylating) activity [GO:0043878]; ethanol catabolic process [GO:0006068]	aldehyde dehydrogenase (NAD+) activity [GO:0004029]; benzaldehyde dehydrogenase (NAD+) activity [GO:0018479]; glyceraldehyde-3-phosphate dehydrogenase (NAD+) (non-phosphorylating) activity [GO:0043878]	GO:0004029; GO:0005737; GO:0006068; GO:0018479; GO:0043878	RecName: Full=Aldehyde dehydrogenase, cytosolic 1; AltName: Full=ALDH class 1; AltName: Full=ALDH-E1; AltName: Full=ALHDII; AltName: Full=Aldehyde dehydrogenase family 1 member A7; AltName: Full=Aldehyde dehydrogenase phenobarbital-inducible - [AL1A7_MOUSE]	58.08	1	14	27	629.61	3.0178e+09	1.42223e+09	1.12734e+09	1.71836e+09	77	80	60	93	79	82	62	96	501	54.553	7.7085
P38647	GRP75	Stress-70 protein, mitochondrial	FUNCTION: Chaperone protein which plays an important role in mitochondrial iron-sulfur cluster (ISC) biogenesis (PubMed:26702583). Interacts with and stabilizes ISC cluster assembly proteins FXN, NFU1, NFS1 and ISCU (By similarity). Regulates erythropoiesis via stabilization of ISC assembly (PubMed:21123823). May play a role in the control of cell proliferation and cellular aging (PubMed:8454632)…	SUBCELLULAR LOCATION: Mitochondrion {ECO:0000269|PubMed:7865888}. Nucleus, nucleolus {ECO:0000250|UniProtKB:P38646}.	cellular response to unfolded protein [GO:0034620]; chaperone cofactor-dependent protein refolding [GO:0051085]; erythrocyte differentiation [GO:0030218]; iron-sulfur cluster assembly [GO:0016226]; negative regulation of cell death [GO:0060548]; negative regulation of erythrocyte differentiation [GO:0045647]; negative regulation of hematopoietic stem cell differentiation [GO:1902037]; negative re…	cytoplasm [GO:0005737]; mitochondrial matrix [GO:0005759]; mitochondrial nucleoid [GO:0042645]; mitochondrion [GO:0005739]; myelin sheath [GO:0043209]; nucleolus [GO:0005730]	cytoplasm [GO:0005737]; mitochondrial matrix [GO:0005759]; mitochondrial nucleoid [GO:0042645]; mitochondrion [GO:0005739]; myelin sheath [GO:0043209]; nucleolus [GO:0005730]; ATP binding [GO:0005524]; ATPase activity [GO:0016887]; ATPase activity, coupled [GO:0042623]; chaperone binding [GO:0051087]; enzyme binding [GO:0019899]; fibroblast growth factor binding [GO:0017134]; heat shock protein b…	ATPase activity [GO:0016887]; ATPase activity, coupled [GO:0042623]; ATP binding [GO:0005524]; chaperone binding [GO:0051087]; enzyme binding [GO:0019899]; fibroblast growth factor binding [GO:0017134]; heat shock protein binding [GO:0031072]; misfolded protein binding [GO:0051787]; protein folding chaperone [GO:0044183]; ubiquitin protein ligase binding [GO:0031625]; unfolded protein binding [GO…	GO:0005524; GO:0005730; GO:0005737; GO:0005739; GO:0005759; GO:0006611; GO:0006986; GO:0016226; GO:0016887; GO:0017134; GO:0019899; GO:0030218; GO:0031072; GO:0031625; GO:0034620; GO:0042026; GO:0042623; GO:0042645; GO:0043209; GO:0044183; GO:0045646; GO:0045647; GO:0046777; GO:0051082; GO:0051085; GO:0051087; GO:0051787; GO:0060548; GO:1902037; GO:1903707	RecName: Full=Stress-70 protein, mitochondrial; AltName: Full=75 kDa glucose-regulated protein; Short=GRP-75; AltName: Full=Heat shock 70 kDa protein 9; AltName: Full=Mortalin; AltName: Full=Peptide-binding protein 74; Short=PBP74; AltName: Full=p66 MOT; Flags: Precursor - [GRP75_MOUSE]	45.07	1	26	26	629.61	8.4814e+08	4.045e+08	9.65823e+08	7.21329e+08	74	70	74	92	76	72	76	95	679	73.4156	6.07471
P32020	NLTP	Non-specific lipid-transfer protein	FUNCTION: Mediates in vitro the transfer of all common phospholipids, cholesterol and gangliosides between membranes. May play a role in regulating steroidogenesis.	SUBCELLULAR LOCATION: Cytoplasm. Note=Cytoplasmic in the liver and also associated with mitochondria especially in steroidogenic tissues.; SUBCELLULAR LOCATION: [Isoform SCP2]: Mitochondrion.; SUBCELLULAR LOCATION: [Isoform SCPx]: Peroxisome. Note=Interaction with PEX5 is essential for peroxisomal import. {ECO:0000250}.	acyl-CoA metabolic process [GO:0006637]; aging [GO:0007568]; bile acid metabolic process [GO:0008206]; fatty acid beta-oxidation [GO:0006635]; inositol trisphosphate biosynthetic process [GO:0032959]; lipid hydroperoxide transport [GO:1901373]; peroxisome organization [GO:0007031]; phospholipid transport [GO:0015914]; positive regulation of apoptotic process [GO:0043065]; positive regulation of c…	cytosol [GO:0005829]; endoplasmic reticulum [GO:0005783]; extrinsic component of membrane [GO:0019898]; extrinsic component of mitochondrial outer membrane [GO:0031315]; intracellular membrane-bounded organelle [GO:0043231]; membrane [GO:0016020]; mitochondrion [GO:0005739]; nucleoplasm [GO:0005654]; nucleus [GO:0005634]; peroxisomal matrix [GO:0005782]; peroxisome [GO:0005777]; protein-containin…	cytosol [GO:0005829]; endoplasmic reticulum [GO:0005783]; extrinsic component of membrane [GO:0019898]; extrinsic component of mitochondrial outer membrane [GO:0031315]; intracellular membrane-bounded organelle [GO:0043231]; membrane [GO:0016020]; mitochondrion [GO:0005739]; nucleoplasm [GO:0005654]; nucleus [GO:0005634]; peroxisomal matrix [GO:0005782]; peroxisome [GO:0005777]; protein-containin…	acetyl-CoA C-acyltransferase activity [GO:0003988]; acetyl-CoA C-myristoyltransferase activity [GO:0050633]; cholesterol binding [GO:0015485]; cholesterol transfer activity [GO:0120020]; fatty-acyl-CoA binding [GO:0000062]; identical protein binding [GO:0042802]; long-chain fatty acyl-CoA binding [GO:0036042]; oleic acid binding [GO:0070538]; phosphatidylcholine transfer activity [GO:0120019]; ph…	GO:0000062; GO:0003988; GO:0005102; GO:0005634; GO:0005654; GO:0005739; GO:0005777; GO:0005782; GO:0005783; GO:0005829; GO:0006635; GO:0006637; GO:0006694; GO:0006701; GO:0007031; GO:0007568; GO:0008206; GO:0008526; GO:0010893; GO:0015485; GO:0015914; GO:0016020; GO:0019898; GO:0031315; GO:0032385; GO:0032934; GO:0032959; GO:0032991; GO:0033814; GO:0036042; GO:0042802; GO:0043065; GO:0043231; GO:…	RecName: Full=Non-specific lipid-transfer protein; Short=NSL-TP; AltName: Full=Propanoyl-CoA C-acyltransferase; AltName: Full=SCP-chi; AltName: Full=SCPX; AltName: Full=Sterol carrier protein 2; Short=SCP-2; AltName: Full=Sterol carrier protein X; Short=SCP-X - [NLTP_MOUSE]	46.98	1	26	26	674.292	3.05374e+09	1948780295	1.89398e+09	1.88071e+09	89	96	55	92	92	99	57	95	547	59.0878	7.44482
Q921H8	THIKA	3-ketoacyl-CoA thiolase A, peroxisomal		SUBCELLULAR LOCATION: Peroxisome {ECO:0000250}.	bile acid metabolic process [GO:0008206]; fatty acid beta-oxidation [GO:0006635]; fatty acid metabolic process [GO:0006631]; phenylacetate catabolic process [GO:0010124]; very long-chain fatty acid metabolic process [GO:0000038]	intracellular membrane-bounded organelle [GO:0043231]; mitochondrion [GO:0005739]; peroxisomal matrix [GO:0005782]; peroxisome [GO:0005777]	intracellular membrane-bounded organelle [GO:0043231]; mitochondrion [GO:0005739]; peroxisomal matrix [GO:0005782]; peroxisome [GO:0005777]; acetate CoA-transferase activity [GO:0008775]; acetyl-CoA C-acetyltransferase activity [GO:0003985]; acetyl-CoA C-acyltransferase activity [GO:0003988]; acetyl-CoA C-myristoyltransferase activity [GO:0050633]; palmitoyl-CoA oxidase activity [GO:0016401]; bil…	acetate CoA-transferase activity [GO:0008775]; acetyl-CoA C-acetyltransferase activity [GO:0003985]; acetyl-CoA C-acyltransferase activity [GO:0003988]; acetyl-CoA C-myristoyltransferase activity [GO:0050633]; palmitoyl-CoA oxidase activity [GO:0016401]	GO:0000038; GO:0003985; GO:0003988; GO:0005739; GO:0005777; GO:0005782; GO:0006631; GO:0006635; GO:0008206; GO:0008775; GO:0010124; GO:0016401; GO:0043231; GO:0050633	RecName: Full=3-ketoacyl-CoA thiolase A, peroxisomal; AltName: Full=Acetyl-CoA acyltransferase A; AltName: Full=Beta-ketothiolase A; AltName: Full=Peroxisomal 3-oxoacyl-CoA thiolase A; Flags: Precursor - [THIKA_MOUSE]	65.57	1	10	21	627.579	1.78415e+09	6.55536e+08	1.24138e+09	1992287636	74	75	69	91	76	77	71	94	424	43.9257	8.44092
Q9QXD6	F16P1	Fructose-1,6-bisphosphatase 1	FUNCTION: Catalyzes the hydrolysis of fructose 1,6-bisphosphate to fructose 6-phosphate in the presence of divalent cations, acting as a rate-limiting enzyme in gluconeogenesis. Plays a role in regulating glucose sensing and insulin secretion of pancreatic beta-cells. Appears to modulate glycerol gluconeogenesis in liver. Important regulator of appetite and adiposity; increased expression of the …		carbohydrate metabolic process [GO:0005975]; cellular response to drug [GO:0035690]; cellular response to magnesium ion [GO:0071286]; dephosphorylation [GO:0016311]; fructose 1,6-bisphosphate metabolic process [GO:0030388]; fructose 6-phosphate metabolic process [GO:0006002]; fructose metabolic process [GO:0006000]; gluconeogenesis [GO:0006094]; negative regulation of cell growth [GO:0030308]; ne…	cytoplasm [GO:0005737]; cytosol [GO:0005829]; nucleus [GO:0005634]	cytoplasm [GO:0005737]; cytosol [GO:0005829]; nucleus [GO:0005634]; AMP binding [GO:0016208]; fructose 1,6-bisphosphate 1-phosphatase activity [GO:0042132]; identical protein binding [GO:0042802]; metal ion binding [GO:0046872]; monosaccharide binding [GO:0048029]; RNA polymerase II transcription factor binding [GO:0001085]; carbohydrate metabolic process [GO:0005975]; cellular response to drug […	AMP binding [GO:0016208]; fructose 1,6-bisphosphate 1-phosphatase activity [GO:0042132]; identical protein binding [GO:0042802]; metal ion binding [GO:0046872]; monosaccharide binding [GO:0048029]; RNA polymerase II transcription factor binding [GO:0001085]	GO:0000122; GO:0001085; GO:0005634; GO:0005737; GO:0005829; GO:0005975; GO:0005986; GO:0006000; GO:0006002; GO:0006094; GO:0006111; GO:0016208; GO:0016311; GO:0030308; GO:0030388; GO:0035690; GO:0042132; GO:0042802; GO:0045820; GO:0046580; GO:0046872; GO:0048029; GO:0071286	RecName: Full=Fructose-1,6-bisphosphatase 1; Short=FBPase 1; AltName: Full=D-fructose-1,6-bisphosphate 1-phosphohydrolase 1; AltName: Full=Fructose-1,6-bisphosphatase isozyme 3; Short=FBPase 3; AltName: Full=Liver FBPase - [F16P1_MOUSE]	65.98	1	20	20	686.478	1970542020	584111022	1.32243e+09	1.3181e+09	87	81	80	90	90	84	82	93	338	36.8888	6.56592
P19639	GSTM4	Glutathione S-transferase Mu 3	FUNCTION: Conjugation of reduced glutathione to a wide number of exogenous and endogenous hydrophobic electrophiles.	SUBCELLULAR LOCATION: Cytoplasm.	cellular response to drug [GO:0035690]; cellular response to organic cyclic compound [GO:0071407]; glutathione metabolic process [GO:0006749]; response to bacterium [GO:0009617]	cytoplasm [GO:0005737]	cytoplasm [GO:0005737]; glutathione transferase activity [GO:0004364]; protein homodimerization activity [GO:0042803]; cellular response to drug [GO:0035690]; cellular response to organic cyclic compound [GO:0071407]; glutathione metabolic process [GO:0006749]; response to bacterium [GO:0009617]	glutathione transferase activity [GO:0004364]; protein homodimerization activity [GO:0042803]	GO:0004364; GO:0005737; GO:0006749; GO:0009617; GO:0035690; GO:0042803; GO:0071407	RecName: Full=Glutathione S-transferase Mu 3; AltName: Full=GST class-mu 3; AltName: Full=Glutathione S-transferase GT9.3 - [GSTM3_MOUSE]	67.89	1	9	17	515.874	4.91483e+09	2.03595e+09	4.98526e+09	5.08404e+09	55	30	79	90	57	31	81	93	218	25.685	7.76709
P58252	EF2	Elongation factor 2	FUNCTION: Catalyzes the GTP-dependent ribosomal translocation step during translation elongation. During this step, the ribosome changes from the pre-translocational (PRE) to the post-translocational (POST) state as the newly formed A-site-bound peptidyl-tRNA and P-site-bound deacylated tRNA move to the P and E sites, respectively. Catalyzes the coordinated movement of the two tRNA molecules, the…	SUBCELLULAR LOCATION: Cytoplasm {ECO:0000250|UniProtKB:P13639}. Nucleus {ECO:0000250|UniProtKB:P13639}. Note=Phosphorylation by CSK promotes cleavage and SUMOylation-dependent nuclear translocation of the C-terminal cleavage product. {ECO:0000250|UniProtKB:P13639}.	aging [GO:0007568]; cellular response to brain-derived neurotrophic factor stimulus [GO:1990416]; glial cell proliferation [GO:0014009]; hematopoietic progenitor cell differentiation [GO:0002244]; positive regulation of cytoplasmic translation [GO:2000767]; positive regulation of translation [GO:0045727]; response to endoplasmic reticulum stress [GO:0034976]; response to estradiol [GO:0032355]; r…	aggresome [GO:0016235]; cytoplasm [GO:0005737]; cytosol [GO:0005829]; membrane raft [GO:0045121]; plasma membrane [GO:0005886]; polysomal ribosome [GO:0042788]; polysome [GO:0005844]; ribonucleoprotein complex [GO:1990904]; synapse [GO:0045202]	aggresome [GO:0016235]; cytoplasm [GO:0005737]; cytosol [GO:0005829]; membrane raft [GO:0045121]; plasma membrane [GO:0005886]; polysomal ribosome [GO:0042788]; polysome [GO:0005844]; ribonucleoprotein complex [GO:1990904]; synapse [GO:0045202]; 5S rRNA binding [GO:0008097]; actin filament binding [GO:0051015]; GTP binding [GO:0005525]; GTPase activity [GO:0003924]; p53 binding [GO:0002039]; prot…	5S rRNA binding [GO:0008097]; actin filament binding [GO:0051015]; GTPase activity [GO:0003924]; GTP binding [GO:0005525]; p53 binding [GO:0002039]; protein kinase binding [GO:0019901]; ribosome binding [GO:0043022]; RNA binding [GO:0003723]; translation elongation factor activity [GO:0003746]	GO:0002039; GO:0002244; GO:0002931; GO:0003009; GO:0003723; GO:0003746; GO:0003924; GO:0005525; GO:0005737; GO:0005829; GO:0005844; GO:0005886; GO:0006414; GO:0007568; GO:0008097; GO:0014009; GO:0016235; GO:0019901; GO:0032355; GO:0034976; GO:0035914; GO:0042542; GO:0042788; GO:0043022; GO:0045121; GO:0045202; GO:0045471; GO:0045727; GO:0051015; GO:0051593; GO:1990416; GO:1990904; GO:2000767	RecName: Full=Elongation factor 2; Short=EF-2 - [EF2_MOUSE]	51.05	1	39	40	637.734	5.73168e+08	3.25633e+08	5.65146e+08	4.68177e+08	91	61	72	90	94	63	74	93	858	95.2529	6.82959
Q01853	TERA	Transitional endoplasmic reticulum ATPase	FUNCTION: Necessary for the fragmentation of Golgi stacks during mitosis and for their reassembly after mitosis. Involved in the formation of the transitional endoplasmic reticulum (tER). The transfer of membranes from the endoplasmic reticulum to the Golgi apparatus occurs via 50-70 nm transition vesicles which derive from part-rough, part-smooth transitional elements of the endoplasmic reticulu…	SUBCELLULAR LOCATION: Cytoplasm, cytosol {ECO:0000250|UniProtKB:P55072}. Endoplasmic reticulum {ECO:0000250|UniProtKB:P55072}. Nucleus {ECO:0000250|UniProtKB:P55072}. Cytoplasm, Stress granule {ECO:0000250|UniProtKB:P55072}. Note=Recruited to the cytoplasmic surface of the endoplasmic reticulum via interaction with AMFR/gp78. Following DNA double-strand breaks, recruited to the sites of damage. R…	activation of cysteine-type endopeptidase activity involved in apoptotic process [GO:0006919]; aggresome assembly [GO:0070842]; ATP metabolic process [GO:0046034]; autophagosome maturation [GO:0097352]; autophagy [GO:0006914]; cellular response to arsenite ion [GO:1903843]; cellular response to DNA damage stimulus [GO:0006974]; cellular response to heat [GO:0034605]; double-strand break repair [G…	ATPase complex [GO:1904949]; cytoplasm [GO:0005737]; cytoplasmic stress granule [GO:0010494]; cytosol [GO:0005829]; Derlin-1 retrotranslocation complex [GO:0036513]; endoplasmic reticulum [GO:0005783]; endoplasmic reticulum membrane [GO:0005789]; glutamatergic synapse [GO:0098978]; intracellular membrane-bounded organelle [GO:0043231]; lipid droplet [GO:0005811]; myelin sheath [GO:0043209]; nucle…	ATPase complex [GO:1904949]; cytoplasm [GO:0005737]; cytoplasmic stress granule [GO:0010494]; cytosol [GO:0005829]; Derlin-1 retrotranslocation complex [GO:0036513]; endoplasmic reticulum [GO:0005783]; endoplasmic reticulum membrane [GO:0005789]; glutamatergic synapse [GO:0098978]; intracellular membrane-bounded organelle [GO:0043231]; lipid droplet [GO:0005811]; myelin sheath [GO:0043209]; nucle…	ADP binding [GO:0043531]; ATPase activity [GO:0016887]; ATP binding [GO:0005524]; BAT3 complex binding [GO:1904288]; deubiquitinase activator activity [GO:0035800]; identical protein binding [GO:0042802]; K48-linked polyubiquitin modification-dependent protein binding [GO:0036435]; lipid binding [GO:0008289]; MHC class I protein binding [GO:0042288]; polyubiquitin modification-dependent protein b…	GO:0000502; GO:0005102; GO:0005524; GO:0005634; GO:0005654; GO:0005737; GO:0005783; GO:0005789; GO:0005811; GO:0005829; GO:0006302; GO:0006511; GO:0006734; GO:0006888; GO:0006914; GO:0006919; GO:0006974; GO:0008289; GO:0010494; GO:0010498; GO:0010918; GO:0016236; GO:0016567; GO:0016887; GO:0019079; GO:0019903; GO:0019904; GO:0019985; GO:0030433; GO:0030970; GO:0031334; GO:0031593; GO:0031625; GO:…	RecName: Full=Transitional endoplasmic reticulum ATPase; Short=TER ATPase; AltName: Full=15S Mg(2+)-ATPase p97 subunit; AltName: Full=Valosin-containing protein; Short=VCP - [TERA_MOUSE]	63.9	3	43	43	562.587	5.13552e+08	2.57658e+08	5.36785e+08	5.10139e+08	68	53	68	88	70	55	70	91	806	89.2657	5.26221
P12710	FABPL	Fatty acid-binding protein, liver	FUNCTION: Plays a role in lipoprotein-mediated cholesterol uptake in hepatocytes. Binds cholesterol. Binds free fatty acids and their coenzyme A derivatives, bilirubin, and some other small molecules in the cytoplasm. May be involved in intracellular lipid transport. {ECO:0000250|UniProtKB:P07148, ECO:0000250|UniProtKB:P82289}.	SUBCELLULAR LOCATION: Cytoplasm.	cellular response to hydrogen peroxide [GO:0070301]; cellular response to hypoxia [GO:0071456]; intestinal absorption [GO:0050892]; long-chain fatty acid transport [GO:0015909]; negative regulation of apoptotic process [GO:0043066]; negative regulation of cysteine-type endopeptidase activity involved in apoptotic process [GO:0043154]; positive regulation of fatty acid beta-oxidation [GO:0032000];…	apical cortex [GO:0045179]; cytoplasm [GO:0005737]; cytosol [GO:0005829]; nucleoplasm [GO:0005654]; nucleus [GO:0005634]; peroxisomal matrix [GO:0005782]; protein-containing complex [GO:0032991]	apical cortex [GO:0045179]; cytoplasm [GO:0005737]; cytosol [GO:0005829]; nucleoplasm [GO:0005654]; nucleus [GO:0005634]; peroxisomal matrix [GO:0005782]; protein-containing complex [GO:0032991]; antioxidant activity [GO:0016209]; bile acid binding [GO:0032052]; chromatin binding [GO:0003682]; drug binding [GO:0008144]; fatty acid binding [GO:0005504]; long-chain fatty acid transporter activity […	antioxidant activity [GO:0016209]; bile acid binding [GO:0032052]; chromatin binding [GO:0003682]; drug binding [GO:0008144]; fatty acid binding [GO:0005504]; long-chain fatty acid transporter activity [GO:0005324]; phospholipid binding [GO:0005543]	GO:0003682; GO:0005324; GO:0005504; GO:0005543; GO:0005634; GO:0005654; GO:0005737; GO:0005782; GO:0005829; GO:0008144; GO:0015909; GO:0016209; GO:0032000; GO:0032052; GO:0032991; GO:0043066; GO:0043154; GO:0045179; GO:0050892; GO:0051345; GO:0070301; GO:0071456	RecName: Full=Fatty acid-binding protein, liver; AltName: Full=14 kDa selenium-binding protein; AltName: Full=Fatty acid-binding protein 1; AltName: Full=Liver-type fatty acid-binding protein; Short=L-FABP - [FABPL_MOUSE]	76.38	1	11	11	865.206	1.26987e+10	7521474377	5808742777	6.3944e+09	136	121	82	87	140	125	85	90	127	14.2365	8.55811
Q9QXF8	GNMT	Glycine N-methyltransferase	FUNCTION: Catalyzes the methylation of glycine by using S-adenosylmethionine (AdoMet) to form N-methylglycine (sarcosine) with the concomitant production of S-adenosylhomocysteine (AdoHcy). Possible crucial role in the regulation of tissue concentration of AdoMet and of metabolism of methionine (By similarity). {ECO:0000250, ECO:0000269|PubMed:15340920}.	SUBCELLULAR LOCATION: Cytoplasm {ECO:0000250}.	glycogen metabolic process [GO:0005977]; methionine metabolic process [GO:0006555]; methylation [GO:0032259]; one-carbon metabolic process [GO:0006730]; protein homotetramerization [GO:0051289]; regulation of gluconeogenesis [GO:0006111]; S-adenosylhomocysteine metabolic process [GO:0046498]; S-adenosylmethionine metabolic process [GO:0046500]; sarcosine metabolic process [GO:1901052]	cytosol [GO:0005829]	cytosol [GO:0005829]; folic acid binding [GO:0005542]; glycine binding [GO:0016594]; glycine N-methyltransferase activity [GO:0017174]; identical protein binding [GO:0042802]; S-adenosyl-L-methionine binding [GO:1904047]; glycogen metabolic process [GO:0005977]; methionine metabolic process [GO:0006555]; methylation [GO:0032259]; one-carbon metabolic process [GO:0006730]; protein homotetramerizat…	folic acid binding [GO:0005542]; glycine binding [GO:0016594]; glycine N-methyltransferase activity [GO:0017174]; identical protein binding [GO:0042802]; S-adenosyl-L-methionine binding [GO:1904047]	GO:0005542; GO:0005829; GO:0005977; GO:0006111; GO:0006555; GO:0006730; GO:0016594; GO:0017174; GO:0032259; GO:0042802; GO:0046498; GO:0046500; GO:0051289; GO:1901052; GO:1904047	RecName: Full=Glycine N-methyltransferase - [GNMT_MOUSE]	55.29	1	14	14	591.021	3.74746e+09	2.12893e+09	2.73726e+09	2.91879e+09	78	82	44	87	80	85	45	90	293	32.6543	7.44482
P34914	HYES	Bifunctional epoxide hydrolase 2	FUNCTION: Bifunctional enzyme. The C-terminal domain has epoxide hydrolase activity and acts on epoxides (alkene oxides, oxiranes) and arene oxides (PubMed:7840649, PubMed:21217101). Plays a role in xenobiotic metabolism by degrading potentially toxic epoxides (By similarity). Also determines steady-state levels of physiological mediators (By similarity). {ECO:0000250|UniProtKB:P34913, ECO:000025…	SUBCELLULAR LOCATION: Cytoplasm {ECO:0000269|PubMed:21217101, ECO:0000269|PubMed:7840649}. Peroxisome.	cholesterol homeostasis [GO:0042632]; dephosphorylation [GO:0016311]; epoxide metabolic process [GO:0097176]; inflammatory response [GO:0006954]; linoleic acid metabolic process [GO:0043651]; phospholipid dephosphorylation [GO:0046839]; positive regulation of blood pressure [GO:0045777]; positive regulation of gene expression [GO:0010628]; prostaglandin production involved in inflammatory respons…	cytosol [GO:0005829]; peroxisome [GO:0005777]	cytosol [GO:0005829]; peroxisome [GO:0005777]; 10-hydroxy-9-(phosphonooxy)octadecanoate phosphatase activity [GO:0033885]; epoxide hydrolase activity [GO:0004301]; lipid phosphatase activity [GO:0042577]; lysophosphatidic acid phosphatase activity [GO:0052642]; magnesium ion binding [GO:0000287]; phosphatase activity [GO:0016791]; protein homodimerization activity [GO:0042803]; toxic substance bi…	10-hydroxy-9-(phosphonooxy)octadecanoate phosphatase activity [GO:0033885]; epoxide hydrolase activity [GO:0004301]; lipid phosphatase activity [GO:0042577]; lysophosphatidic acid phosphatase activity [GO:0052642]; magnesium ion binding [GO:0000287]; phosphatase activity [GO:0016791]; protein homodimerization activity [GO:0042803]; toxic substance binding [GO:0015643]	GO:0000287; GO:0002539; GO:0004301; GO:0005777; GO:0005829; GO:0006954; GO:0009636; GO:0010628; GO:0015643; GO:0016311; GO:0016791; GO:0019233; GO:0033885; GO:0042577; GO:0042632; GO:0042803; GO:0043651; GO:0045777; GO:0046272; GO:0046839; GO:0052642; GO:0090181; GO:0097176	RecName: Full=Bifunctional epoxide hydrolase 2; Includes: RecName: Full=Cytosolic epoxide hydrolase 2; Short=CEH; AltName: Full=Epoxide hydratase; AltName: Full=Soluble epoxide hydrolase; Short=SEH; Includes: RecName: Full=Lipid-phosphate phosphatase - [HYES_MOUSE]	72.02	1	30	30	741.315	1.39254e+09	6.33184e+08	6.71611e+08	7.26721e+08	114	86	79	86	118	89	81	89	554	62.4746	6.18896
P51660	DHB4	Peroxisomal multifunctional enzyme type 2	FUNCTION: Bifunctional enzyme acting on the peroxisomal beta-oxidation pathway for fatty acids (PubMed:17442273). Catalyzes the formation of 3-ketoacyl-CoA intermediates from straight-chain, 2-methyl-branched-chain fatty acids bile acid intermediates. With EHHADH, catalyzes the hydration of trans-2-enoyl-CoA and the dehydrogenation of 3-hydroxyacyl-CoA, but with opposite chiral specificity (By si…	SUBCELLULAR LOCATION: Peroxisome {ECO:0000250|UniProtKB:P97852}.	androgen metabolic process [GO:0008209]; estrogen metabolic process [GO:0008210]; fatty acid beta-oxidation [GO:0006635]; medium-chain fatty-acyl-CoA metabolic process [GO:0036112]; Sertoli cell development [GO:0060009]; very long-chain fatty acid metabolic process [GO:0000038]; very long-chain fatty-acyl-CoA metabolic process [GO:0036111]	mitochondrion [GO:0005739]; peroxisomal matrix [GO:0005782]; peroxisome [GO:0005777]	mitochondrion [GO:0005739]; peroxisomal matrix [GO:0005782]; peroxisome [GO:0005777]; 17-beta-hydroxysteroid dehydrogenase (NAD+) activity [GO:0044594]; 3-hydroxyacyl-CoA dehydratase activity [GO:0018812]; 3-hydroxyacyl-CoA dehydrogenase activity [GO:0003857]; 3alpha,7alpha,12alpha-trihydroxy-5beta-cholest-24-enoyl-CoA hydratase activity [GO:0033989]; enoyl-CoA hydratase activity [GO:0004300]; es…	17-beta-hydroxysteroid dehydrogenase (NAD+) activity [GO:0044594]; 3alpha,7alpha,12alpha-trihydroxy-5beta-cholest-24-enoyl-CoA hydratase activity [GO:0033989]; 3-hydroxyacyl-CoA dehydratase activity [GO:0018812]; 3-hydroxyacyl-CoA dehydrogenase activity [GO:0003857]; enoyl-CoA hydratase activity [GO:0004300]; estradiol 17-beta-dehydrogenase activity [GO:0004303]; identical protein binding [GO:004…	GO:0000038; GO:0003857; GO:0004300; GO:0004303; GO:0005739; GO:0005777; GO:0005782; GO:0006635; GO:0008209; GO:0008210; GO:0016508; GO:0016853; GO:0018812; GO:0033989; GO:0036111; GO:0036112; GO:0042802; GO:0042803; GO:0044594; GO:0060009	RecName: Full=Peroxisomal multifunctional enzyme type 2; Short=MFE-2; AltName: Full=17-beta-hydroxysteroid dehydrogenase 4; Short=17-beta-HSD 4; AltName: Full=D-bifunctional protein; Short=DBP; AltName: Full=Multifunctional protein 2; Short=MFP-2; Contains: RecName: Full=(3R)-hydroxyacyl-CoA dehydrogenase; Contains: RecName: Full=Enoyl-CoA hydratase 2; AltName: Full=3-alpha,7-alpha,12-alpha-trihy…	53.47	1	33	33	625.548	6.95609e+08	4.50947e+08	7.65207e+08	6.5121e+08	78	70	77	83	80	72	79	86	735	79.432	8.57275
Q9EQ20	MMSA	Methylmalonate-semialdehyde dehydrogenase [acylating], mitochondrial	FUNCTION: Plays a role in valine and pyrimidine metabolism. Binds fatty acyl-CoA (By similarity). {ECO:0000250}.	SUBCELLULAR LOCATION: Mitochondrion {ECO:0000250}.	beta-alanine catabolic process [GO:0019484]; brown fat cell differentiation [GO:0050873]; thymine catabolic process [GO:0006210]; thymine metabolic process [GO:0019859]; valine catabolic process [GO:0006574]; valine metabolic process [GO:0006573]	mitochondrion [GO:0005739]; nucleoplasm [GO:0005654]	mitochondrion [GO:0005739]; nucleoplasm [GO:0005654]; malonate-semialdehyde dehydrogenase (acetylating) activity [GO:0018478]; methylmalonate-semialdehyde dehydrogenase (acylating) activity [GO:0004491]; thiolester hydrolase activity [GO:0016790]; beta-alanine catabolic process [GO:0019484]; brown fat cell differentiation [GO:0050873]; thymine catabolic process [GO:0006210]; thymine metabolic pro…	malonate-semialdehyde dehydrogenase (acetylating) activity [GO:0018478]; methylmalonate-semialdehyde dehydrogenase (acylating) activity [GO:0004491]; thiolester hydrolase activity [GO:0016790]	GO:0004491; GO:0005654; GO:0005739; GO:0006210; GO:0006573; GO:0006574; GO:0016790; GO:0018478; GO:0019484; GO:0019859; GO:0050873	RecName: Full=Methylmalonate-semialdehyde dehydrogenase [acylating], mitochondrial; Short=MMSDH; Short=Malonate-semialdehyde dehydrogenase [acylating]; AltName: Full=Aldehyde dehydrogenase family 6 member A1; Flags: Precursor - [MMSA_MOUSE]	61.31	1	29	29	684.447	1.09649e+09	6.40282e+08	6.50328e+08	6.19811e+08	97	90	68	82	100	93	70	85	535	57.8785	8.07471
P05202	AATM	Aspartate aminotransferase, mitochondrial	FUNCTION: Catalyzes the irreversible transamination of the L-tryptophan metabolite L-kynurenine to form kynurenic acid (KA). As a member of the malate-aspartate shuttle, it has a key role in the intracellular NAD(H) redox balance. Is important for metabolite exchange between mitochondria and cytosol, and for amino acid metabolism. Facilitates cellular uptake of long-chain free fatty acids. {ECO:0…	SUBCELLULAR LOCATION: Mitochondrion matrix. Cell membrane {ECO:0000269|PubMed:7878064}.	2-oxoglutarate metabolic process [GO:0006103]; aspartate biosynthetic process [GO:0006532]; aspartate catabolic process [GO:0006533]; aspartate metabolic process [GO:0006531]; cellular amino acid metabolic process [GO:0006520]; dicarboxylic acid metabolic process [GO:0043648]; fatty acid transport [GO:0015908]; female pregnancy [GO:0007565]; glutamate catabolic process to 2-oxoglutarate [GO:00195…	cell surface [GO:0009986]; mitochondrial inner membrane [GO:0005743]; mitochondrial matrix [GO:0005759]; mitochondrion [GO:0005739]; myelin sheath [GO:0043209]; perikaryon [GO:0043204]; plasma membrane [GO:0005886]; protein-containing complex [GO:0032991]; sarcolemma [GO:0042383]; T-tubule [GO:0030315]	cell surface [GO:0009986]; mitochondrial inner membrane [GO:0005743]; mitochondrial matrix [GO:0005759]; mitochondrion [GO:0005739]; myelin sheath [GO:0043209]; perikaryon [GO:0043204]; plasma membrane [GO:0005886]; protein-containing complex [GO:0032991]; sarcolemma [GO:0042383]; T-tubule [GO:0030315]; amino acid binding [GO:0016597]; carboxylic acid binding [GO:0031406]; enzyme binding [GO:0019…	amino acid binding [GO:0016597]; carboxylic acid binding [GO:0031406]; enzyme binding [GO:0019899]; identical protein binding [GO:0042802]; kynurenine-oxoglutarate transaminase activity [GO:0016212]; L-aspartate:2-oxoglutarate aminotransferase activity [GO:0004069]; phospholipid binding [GO:0005543]; pyridoxal phosphate binding [GO:0030170]	GO:0004069; GO:0005543; GO:0005739; GO:0005743; GO:0005759; GO:0005886; GO:0006103; GO:0006107; GO:0006520; GO:0006531; GO:0006532; GO:0006533; GO:0006536; GO:0007565; GO:0007595; GO:0009986; GO:0014850; GO:0015908; GO:0016212; GO:0016597; GO:0019550; GO:0019551; GO:0019899; GO:0030170; GO:0030315; GO:0031406; GO:0032868; GO:0032991; GO:0042383; GO:0042802; GO:0043204; GO:0043209; GO:0043278; GO:…	RecName: Full=Aspartate aminotransferase, mitochondrial; Short=mAspAT; AltName: Full=Fatty acid-binding protein; Short=FABP-1; AltName: Full=Glutamate oxaloacetate transaminase 2; AltName: Full=Kynurenine aminotransferase 4; AltName: Full=Kynurenine aminotransferase IV; AltName: Full=Kynurenine--oxoglutarate transaminase 4; AltName: Full=Kynurenine--oxoglutarate transaminase IV; AltName: Full=Pla…	63.26	1	26	26	568.68	2.21579e+09	1252459423	1.51938e+09	1.15469e+09	62	73	63	82	64	75	65	85	430	47.3812	8.99756
P17563	SBP1	Selenium-binding protein 1	FUNCTION: Catalyzes the oxidation of methanethiol, an organosulfur compound known to be produced in substantial amounts by gut bacteria (PubMed:29255262). Selenium-binding protein which may be involved in the sensing of reactive xenobiotics in the cytoplasm. May be involved in intra-Golgi protein transport (By similarity). {ECO:0000250|UniProtKB:Q8VIF7, ECO:0000269|PubMed:29255262}.	SUBCELLULAR LOCATION: Nucleus {ECO:0000250|UniProtKB:Q13228}. Cytoplasm, cytosol {ECO:0000250|UniProtKB:Q13228}. Membrane {ECO:0000250|UniProtKB:Q8VIF7}; Peripheral membrane protein {ECO:0000250|UniProtKB:Q8VIF7}. Note=May associate with Golgi membrane (By similarity). May associate with the membrane of autophagosomes (By similarity). {ECO:0000250|UniProtKB:Q8VIF7}.	brown fat cell differentiation [GO:0050873]; protein transport [GO:0015031]	cytosol [GO:0005829]; fibrillar center [GO:0001650]; membrane [GO:0016020]; nucleolus [GO:0005730]	cytosol [GO:0005829]; fibrillar center [GO:0001650]; membrane [GO:0016020]; nucleolus [GO:0005730]; methanethiol oxidase activity [GO:0018549]; selenium binding [GO:0008430]; brown fat cell differentiation [GO:0050873]; protein transport [GO:0015031]	methanethiol oxidase activity [GO:0018549]; selenium binding [GO:0008430]	GO:0001650; GO:0005730; GO:0005829; GO:0008430; GO:0015031; GO:0016020; GO:0018549; GO:0050873	RecName: Full=Methanethiol oxidase; Short=MTO; AltName: Full=56 kDa selenium-binding protein; Short=SBP56; Short=SP56; AltName: Full=Selenium-binding protein 1 - [SBP1_MOUSE]	77.12	1	6	30	761.625	2.60266e+09	1.58822e+09	7.92658e+08	7.13587e+08	121	108	65	81	125	111	67	84	472	52.4804	6.29053
P41216	ACSL1	Long-chain-fatty-acid--CoA ligase 1	FUNCTION: Catalyzes the conversion of long-chain fatty acids to their active form acyl-CoAs for both synthesis of cellular lipids, and degradation via beta-oxidation (By similarity). Preferentially uses palmitoleate, oleate and linoleate (By similarity). Preferentially activates arachidonate than epoxyeicosatrienoic acids (EETs) or hydroxyeicosatrienoic acids (HETEs). {ECO:0000250|UniProtKB:P1816…	SUBCELLULAR LOCATION: Mitochondrion outer membrane {ECO:0000250}; Single-pass type III membrane protein {ECO:0000250}. Peroxisome membrane {ECO:0000250}; Single-pass type III membrane protein {ECO:0000250}. Microsome membrane {ECO:0000250}; Single-pass type III membrane protein {ECO:0000250}. Endoplasmic reticulum membrane {ECO:0000250|UniProtKB:P33121}; Single-pass type III membrane protein {ECO…	adiponectin-activated signaling pathway [GO:0033211]; fatty acid metabolic process [GO:0006631]; fatty acid transport [GO:0015908]; lipid biosynthetic process [GO:0008610]; long-chain fatty acid import into cell [GO:0044539]; long-chain fatty acid metabolic process [GO:0001676]; long-chain fatty-acyl-CoA biosynthetic process [GO:0035338]; positive regulation of cold-induced thermogenesis [GO:0120…	endoplasmic reticulum [GO:0005783]; endoplasmic reticulum membrane [GO:0005789]; integral component of membrane [GO:0016021]; mitochondrial outer membrane [GO:0005741]; mitochondrion [GO:0005739]; peroxisomal membrane [GO:0005778]; plasma membrane [GO:0005886]	endoplasmic reticulum [GO:0005783]; endoplasmic reticulum membrane [GO:0005789]; integral component of membrane [GO:0016021]; mitochondrial outer membrane [GO:0005741]; mitochondrion [GO:0005739]; peroxisomal membrane [GO:0005778]; plasma membrane [GO:0005886]; acyl-CoA ligase activity [GO:0003996]; arachidonate-CoA ligase activity [GO:0047676]; ATP binding [GO:0005524]; decanoate-CoA ligase acti…	acyl-CoA ligase activity [GO:0003996]; arachidonate-CoA ligase activity [GO:0047676]; ATP binding [GO:0005524]; decanoate-CoA ligase activity [GO:0102391]; long-chain fatty acid-CoA ligase activity [GO:0004467]; phytanate-CoA ligase activity [GO:0050197]	GO:0000038; GO:0001676; GO:0003996; GO:0004467; GO:0005524; GO:0005739; GO:0005741; GO:0005778; GO:0005783; GO:0005789; GO:0005886; GO:0006631; GO:0007584; GO:0008610; GO:0010033; GO:0014070; GO:0015908; GO:0016021; GO:0019432; GO:0033211; GO:0034201; GO:0035338; GO:0042178; GO:0042493; GO:0044539; GO:0047676; GO:0050197; GO:0071902; GO:0102391; GO:0120162	RecName: Full=Long-chain-fatty-acid--CoA ligase 1; AltName: Full=Arachidonate--CoA ligase; AltName: Full=Long-chain acyl-CoA synthetase 1; Short=LACS 1; AltName: Full=Phytanate--CoA ligase - [ACSL1_MOUSE]	59.51	1	31	35	631.641	9.32315e+08	5.52554e+08	5.4745e+08	5.31672e+08	87	77	69	78	90	79	71	80	699	77.9014	7.15186
P27773	PDIA3	Protein disulfide-isomerase A3		SUBCELLULAR LOCATION: Endoplasmic reticulum {ECO:0000250|UniProtKB:P30101}. Endoplasmic reticulum lumen {ECO:0000250}. Melanosome {ECO:0000250|UniProtKB:P30101}.	cell redox homeostasis [GO:0045454]; cellular response to interleukin-7 [GO:0098761]; cellular response to vitamin D [GO:0071305]; positive regulation of extrinsic apoptotic signaling pathway [GO:2001238]; positive regulation of protein folding [GO:1903334]; protein folding [GO:0006457]; response to endoplasmic reticulum stress [GO:0034976]	acrosomal vesicle [GO:0001669]; apical plasma membrane [GO:0016324]; cell [GO:0005623]; cell surface [GO:0009986]; cytoplasm [GO:0005737]; endoplasmic reticulum [GO:0005783]; endoplasmic reticulum lumen [GO:0005788]; extracellular region [GO:0005576]; extracellular space [GO:0005615]; melanosome [GO:0042470]; MHC class I peptide loading complex [GO:0042824]; mitochondrial intermembrane space [GO:…	acrosomal vesicle [GO:0001669]; apical plasma membrane [GO:0016324]; cell [GO:0005623]; cell surface [GO:0009986]; cytoplasm [GO:0005737]; endoplasmic reticulum [GO:0005783]; endoplasmic reticulum lumen [GO:0005788]; extracellular region [GO:0005576]; extracellular space [GO:0005615]; melanosome [GO:0042470]; MHC class I peptide loading complex [GO:0042824]; mitochondrial intermembrane space [GO:…	identical protein binding [GO:0042802]; MHC class I protein binding [GO:0042288]; peptidase activity [GO:0008233]; peptide disulfide oxidoreductase activity [GO:0015037]; protein disulfide isomerase activity [GO:0003756]; protein-disulfide reductase (glutathione) activity [GO:0019153]	GO:0001669; GO:0003756; GO:0005576; GO:0005615; GO:0005623; GO:0005634; GO:0005737; GO:0005739; GO:0005758; GO:0005783; GO:0005788; GO:0005790; GO:0005886; GO:0006457; GO:0008233; GO:0009986; GO:0015037; GO:0016324; GO:0019153; GO:0034976; GO:0042288; GO:0042470; GO:0042802; GO:0042824; GO:0042825; GO:0043209; GO:0045454; GO:0071305; GO:0098761; GO:1903334; GO:2001238	RecName: Full=Protein disulfide-isomerase A3; AltName: Full=58 kDa glucose-regulated protein; AltName: Full=58 kDa microsomal protein; Short=p58; AltName: Full=Disulfide isomerase ER-60; AltName: Full=Endoplasmic reticulum resident protein 57; Short=ER protein 57; Short=ERp57; AltName: Full=Endoplasmic reticulum resident protein 60; Short=ER protein 60; Short=ERp60; Flags: Precursor - [PDIA3_MOUS…	53.07	1	28	28	633.672	1.04103e+09	753194276	1056273956	8.27248e+08	82	67	86	77	85	69	89	79	505	56.6427	6.21436
P70694	DHB5	Estradiol 17 beta-dehydrogenase 5	FUNCTION: Active toward androgens, estrogens, and xenobiotic substrates. Also exhibits low 20 alpha-HSD activity. Shows a-stereospecificity in hydrogen transfer between cofactors and substrates (A-specific). Preferentially catalyzes the reduction of 4-androstenedione, 5-alpha-androstane-3,17-dione, androsterone and dehydroepiandrosterone to testosterone, dihydrotestosterone, 5-alpha-androstane-3-…		C21-steroid hormone metabolic process [GO:0008207]; cellular response to jasmonic acid stimulus [GO:0071395]; daunorubicin metabolic process [GO:0044597]; doxorubicin metabolic process [GO:0044598]; negative regulation of mRNA splicing, via spliceosome [GO:0048025]; progesterone metabolic process [GO:0042448]; prostaglandin metabolic process [GO:0006693]; response to drug [GO:0042493]; response t…	cytoplasm [GO:0005737]; cytosol [GO:0005829]; nucleus [GO:0005634]	cytoplasm [GO:0005737]; cytosol [GO:0005829]; nucleus [GO:0005634]; 17-alpha,20-alpha-dihydroxypregn-4-en-3-one dehydrogenase activity [GO:0047006]; alcohol dehydrogenase (NADP+) activity [GO:0008106]; alditol:NADP+ 1-oxidoreductase activity [GO:0004032]; aldo-keto reductase (NADP) activity [GO:0004033]; androsterone dehydrogenase activity [GO:0047023]; bile acid binding [GO:0032052]; estradiol 1…	17-alpha,20-alpha-dihydroxypregn-4-en-3-one dehydrogenase activity [GO:0047006]; alcohol dehydrogenase (NADP+) activity [GO:0008106]; alditol:NADP+ 1-oxidoreductase activity [GO:0004032]; aldo-keto reductase (NADP) activity [GO:0004033]; androsterone dehydrogenase activity [GO:0047023]; bile acid binding [GO:0032052]; estradiol 17-beta-dehydrogenase activity [GO:0004303]; ketosteroid monooxygenas…	GO:0001758; GO:0004032; GO:0004033; GO:0004303; GO:0005634; GO:0005737; GO:0005829; GO:0006693; GO:0006694; GO:0008106; GO:0008202; GO:0008207; GO:0016229; GO:0016491; GO:0016655; GO:0032052; GO:0042448; GO:0042493; GO:0043627; GO:0044597; GO:0044598; GO:0047006; GO:0047023; GO:0047045; GO:0047086; GO:0048025; GO:0071395	RecName: Full=Estradiol 17 beta-dehydrogenase 5; AltName: Full=17-beta-HSD 5 - [DHB5_MOUSE]	76.78	4	22	24	619.455	2.06552e+09	1.34219e+09	1.13004e+09	9.39923e+08	88	80	61	76	91	82	63	78	323	37.024	8.27979
Q8VCT4	CES1D	Carboxylesterase 1D	FUNCTION: Major lipase in white adipose tissue. Involved in the metabolism of xenobiotics and of natural substrates. Hydrolyzes triacylglycerols and monoacylglycerols, with a preference for monoacylglycerols. The susceptibility of the substrate increases with decreasing acyl chain length of the fatty acid moiety. Catalyzes the synthesis of fatty acid ethyl esters (PubMed:15220344). Hydrolyzes ret…	SUBCELLULAR LOCATION: Endoplasmic reticulum lumen {ECO:0000269|PubMed:15220344}. Cytoplasm, cytosol {ECO:0000269|PubMed:15220344}. Lipid droplet {ECO:0000269|PubMed:15220344}. Microsome {ECO:0000250|UniProtKB:P16303}.	acyl-CoA metabolic process [GO:0006637]; acylglycerol catabolic process [GO:0046464]; cellular response to cholesterol [GO:0071397]; cellular response to low-density lipoprotein particle stimulus [GO:0071404]; cholesterol biosynthetic process [GO:0006695]; cholesterol homeostasis [GO:0042632]; epithelial cell differentiation [GO:0030855]; lipid catabolic process [GO:0016042]; medium-chain fatty a…	cytosol [GO:0005829]; endoplasmic reticulum [GO:0005783]; endoplasmic reticulum lumen [GO:0005788]; extracellular space [GO:0005615]; lipid droplet [GO:0005811]	cytosol [GO:0005829]; endoplasmic reticulum [GO:0005783]; endoplasmic reticulum lumen [GO:0005788]; extracellular space [GO:0005615]; lipid droplet [GO:0005811]; carboxylic ester hydrolase activity [GO:0052689]; fatty-acyl-ethyl-ester synthase activity [GO:0030339]; methyl indole-3-acetate esterase activity [GO:0080030]; sterol esterase activity [GO:0004771]; triglyceride lipase activity [GO:0004…	carboxylic ester hydrolase activity [GO:0052689]; fatty-acyl-ethyl-ester synthase activity [GO:0030339]; methyl indole-3-acetate esterase activity [GO:0080030]; sterol esterase activity [GO:0004771]; triglyceride lipase activity [GO:0004806]	GO:0004771; GO:0004806; GO:0005615; GO:0005783; GO:0005788; GO:0005811; GO:0005829; GO:0006637; GO:0006695; GO:0009636; GO:0010875; GO:0010887; GO:0016042; GO:0019626; GO:0030339; GO:0030855; GO:0034379; GO:0042632; GO:0043691; GO:0046464; GO:0051791; GO:0052689; GO:0071397; GO:0071404; GO:0080030	RecName: Full=Carboxylesterase 1D; AltName: Full=Carboxylesterase 3; AltName: Full=Fatty acid ethyl ester synthase; Short=FAEE synthase; AltName: Full=Triacylglycerol hydrolase; Short=TGH; Flags: Precursor - [EST1D_MOUSE]	54.87	3	21	25	649.92	2.3032e+09	1.13518e+09	9.64677e+08	7.80499e+08	113	79	52	76	117	81	54	78	565	61.7487	6.60986
P01942	HBA	Hemoglobin subunit alpha	FUNCTION: Involved in oxygen transport from the lung to the various peripheral tissues.		cellular oxidant detoxification [GO:0098869]; erythrocyte development [GO:0048821]; hydrogen peroxide catabolic process [GO:0042744]; in utero embryonic development [GO:0001701]; response to bacterium [GO:0009617]; response to stilbenoid [GO:0035634]	cytosolic small ribosomal subunit [GO:0022627]; extracellular space [GO:0005615]; haptoglobin-hemoglobin complex [GO:0031838]; hemoglobin complex [GO:0005833]; myelin sheath [GO:0043209]	cytosolic small ribosomal subunit [GO:0022627]; extracellular space [GO:0005615]; haptoglobin-hemoglobin complex [GO:0031838]; hemoglobin complex [GO:0005833]; myelin sheath [GO:0043209]; heme binding [GO:0020037]; iron ion binding [GO:0005506]; organic acid binding [GO:0043177]; oxygen binding [GO:0019825]; oxygen carrier activity [GO:0005344]; protein-containing complex binding [GO:0044877]; ce…	heme binding [GO:0020037]; iron ion binding [GO:0005506]; organic acid binding [GO:0043177]; oxygen binding [GO:0019825]; oxygen carrier activity [GO:0005344]; protein-containing complex binding [GO:0044877]	GO:0001701; GO:0005344; GO:0005506; GO:0005615; GO:0005833; GO:0009617; GO:0019825; GO:0020037; GO:0022627; GO:0031838; GO:0035634; GO:0042744; GO:0043177; GO:0043209; GO:0044877; GO:0048821; GO:0098869	RecName: Full=Hemoglobin subunit alpha; AltName: Full=Alpha-globin; AltName: Full=Hemoglobin alpha chain - [HBA_MOUSE]	62.68	2	7	7	633.672	6.35159e+09	4.26284e+09	6.28661e+09	4.14429e+09	54	48	135	75	56	49	139	77	142	15.0758	8.22119
Q64459	CP3AB	Cytochrome P450 3A11	FUNCTION: Catalyzes erythromycin N-demethylation, nifedipine oxidation and testosterone 6 beta-hydroxylation.	SUBCELLULAR LOCATION: Endoplasmic reticulum membrane; Peripheral membrane protein. Microsome membrane; Peripheral membrane protein.	oxidative demethylation [GO:0070989]; response to bacterium [GO:0009617]; steroid metabolic process [GO:0008202]	endoplasmic reticulum membrane [GO:0005789]; intracellular membrane-bounded organelle [GO:0043231]	endoplasmic reticulum membrane [GO:0005789]; intracellular membrane-bounded organelle [GO:0043231]; aromatase activity [GO:0070330]; demethylase activity [GO:0032451]; estrogen 16-alpha-hydroxylase activity [GO:0101020]; heme binding [GO:0020037]; iron ion binding [GO:0005506]; monooxygenase activity [GO:0004497]; oxidoreductase activity [GO:0016491]; retinoic acid 4-hydroxylase activity [GO:0008…	aromatase activity [GO:0070330]; demethylase activity [GO:0032451]; estrogen 16-alpha-hydroxylase activity [GO:0101020]; heme binding [GO:0020037]; iron ion binding [GO:0005506]; monooxygenase activity [GO:0004497]; oxidoreductase activity [GO:0016491]; retinoic acid 4-hydroxylase activity [GO:0008401]; steroid hydroxylase activity [GO:0008395]; testosterone 6-beta-hydroxylase activity [GO:005064…	GO:0004497; GO:0005506; GO:0005789; GO:0008202; GO:0008395; GO:0008401; GO:0009617; GO:0016491; GO:0020037; GO:0032451; GO:0043231; GO:0050649; GO:0070330; GO:0070989; GO:0101020	RecName: Full=Cytochrome P450 3A11; AltName: Full=CYPIIIA11; AltName: Full=Cytochrome P-450IIIAM1; AltName: Full=Cytochrome P-450UT - [CP3AB_MOUSE]	48.41	3	23	23	509.781	1.45975e+09	7.35613e+08	6.02377e+08	8.78247e+08	82	52	42	75	85	54	43	77	504	57.817	8.82178
P16331	PH4H	Phenylalanine-4-hydroxylase	FUNCTION: Catalyzes the hydroxylation of L-phenylalanine to L-tyrosine. {ECO:0000250|UniProtKB:P00439}.		L-phenylalanine catabolic process [GO:0006559]; L-phenylalanine metabolic process [GO:0006558]; protein hydroxylation [GO:0018126]; pteridine-containing compound metabolic process [GO:0042558]; tetrahydrobiopterin metabolic process [GO:0046146]; tyrosine biosynthetic process [GO:0006571]		amino acid binding [GO:0016597]; cofactor binding [GO:0048037]; identical protein binding [GO:0042802]; iron ion binding [GO:0005506]; phenylalanine 4-monooxygenase activity [GO:0004505]; L-phenylalanine catabolic process [GO:0006559]; L-phenylalanine metabolic process [GO:0006558]; protein hydroxylation [GO:0018126]; pteridine-containing compound metabolic process [GO:0042558]; tetrahydrobiopter…	amino acid binding [GO:0016597]; cofactor binding [GO:0048037]; identical protein binding [GO:0042802]; iron ion binding [GO:0005506]; phenylalanine 4-monooxygenase activity [GO:0004505]	GO:0004505; GO:0005506; GO:0006558; GO:0006559; GO:0006571; GO:0016597; GO:0018126; GO:0042558; GO:0042802; GO:0046146; GO:0048037	RecName: Full=Phenylalanine-4-hydroxylase; Short=PAH; AltName: Full=Phe-4-monooxygenase - [PH4H_MOUSE]	67.33	1	26	26	442.758	459432148	3.15006e+08	3.65467e+08	5.64285e+08	62	49	33	74	64	51	34	76	453	51.8674	6.30322
P08249	MDHM	Malate dehydrogenase, mitochondrial		SUBCELLULAR LOCATION: Mitochondrion matrix {ECO:0000250|UniProtKB:P04636}.	aerobic respiration [GO:0009060]; carbohydrate metabolic process [GO:0005975]; internal protein amino acid acetylation [GO:0006475]; malate metabolic process [GO:0006108]; NADH metabolic process [GO:0006734]; oxaloacetate metabolic process [GO:0006107]; tricarboxylic acid cycle [GO:0006099]	cytoplasm [GO:0005737]; membrane [GO:0016020]; mitochondrial inner membrane [GO:0005743]; mitochondrial matrix [GO:0005759]; mitochondrion [GO:0005739]; myelin sheath [GO:0043209]	cytoplasm [GO:0005737]; membrane [GO:0016020]; mitochondrial inner membrane [GO:0005743]; mitochondrial matrix [GO:0005759]; mitochondrion [GO:0005739]; myelin sheath [GO:0043209]; L-malate dehydrogenase activity [GO:0030060]; malate dehydrogenase (NADP+) activity [GO:0046554]; malate dehydrogenase activity [GO:0016615]; protein homodimerization activity [GO:0042803]; protein self-association [GO…	L-malate dehydrogenase activity [GO:0030060]; malate dehydrogenase (NADP+) activity [GO:0046554]; malate dehydrogenase activity [GO:0016615]; protein homodimerization activity [GO:0042803]; protein self-association [GO:0043621]	GO:0005737; GO:0005739; GO:0005743; GO:0005759; GO:0005975; GO:0006099; GO:0006107; GO:0006108; GO:0006475; GO:0006734; GO:0009060; GO:0016020; GO:0016615; GO:0030060; GO:0042803; GO:0043209; GO:0043621; GO:0046554	RecName: Full=Malate dehydrogenase, mitochondrial; Flags: Precursor - [MDHM_MOUSE]	61.24	1	16	16	511.812	1.44686e+09	7.60825e+08	1.91036e+09	1.29323e+09	58	61	60	73	60	63	62	75	338	35.5888	8.67529
Q64374	RGN	Regucalcin	FUNCTION: Gluconolactonase with low activity towards other sugar lactones, including gulonolactone and galactonolactone. Catalyzes a key step in ascorbic acid (vitamin C) biosynthesis. Can also hydrolyze diisopropyl phosphorofluoridate and phenylacetate (in vitro). Calcium-binding protein. Modulates Ca(2+) signaling, and Ca(2+)-dependent cellular processes and enzyme activities (By similarity). {…	SUBCELLULAR LOCATION: Cytoplasm.	aging [GO:0007568]; cellular calcium ion homeostasis [GO:0006874]; kidney development [GO:0001822]; L-ascorbic acid biosynthetic process [GO:0019853]; liver regeneration [GO:0097421]; negative regulation of apoptotic process [GO:0043066]; negative regulation of bone development [GO:1903011]; negative regulation of calcium-dependent ATPase activity [GO:1903611]; negative regulation of cyclic-nucle…	cell [GO:0005623]; cytoplasm [GO:0005737]; cytosol [GO:0005829]; nucleus [GO:0005634]	cell [GO:0005623]; cytoplasm [GO:0005737]; cytosol [GO:0005829]; nucleus [GO:0005634]; calcium ion binding [GO:0005509]; enzyme regulator activity [GO:0030234]; gluconolactonase activity [GO:0004341]; zinc ion binding [GO:0008270]; aging [GO:0007568]; cellular calcium ion homeostasis [GO:0006874]; kidney development [GO:0001822]; L-ascorbic acid biosynthetic process [GO:0019853]; liver regenerati…	calcium ion binding [GO:0005509]; enzyme regulator activity [GO:0030234]; gluconolactonase activity [GO:0004341]; zinc ion binding [GO:0008270]	GO:0001822; GO:0001933; GO:0004341; GO:0005509; GO:0005623; GO:0005634; GO:0005737; GO:0005829; GO:0006469; GO:0006874; GO:0007283; GO:0007568; GO:0008270; GO:0010867; GO:0010907; GO:0010922; GO:0019853; GO:0030234; GO:0032515; GO:0032781; GO:0034260; GO:0043066; GO:0043547; GO:0045019; GO:0045723; GO:0050680; GO:0050848; GO:0051344; GO:0097421; GO:1901318; GO:1901671; GO:1901896; GO:1902679; GO:…	RecName: Full=Regucalcin; Short=RC; AltName: Full=Gluconolactonase; Short=GNL; AltName: Full=Senescence marker protein 30; Short=SMP-30 - [RGN_MOUSE]	73.24	1	20	20	586.959	4.71132e+09	2.37218e+09	1.99336e+09	2.14789e+09	83	77	56	73	86	79	58	75	299	33.3855	5.33838
Q9D379	HYEP	Epoxide hydrolase 1	FUNCTION: Biotransformation enzyme that catalyzes the hydrolysis of arene and aliphatic epoxides to less reactive and more water soluble dihydrodiols by the trans addition of water. May play a role in the metabolism of endogenous lipids such as epoxide-containing fatty acids. Metabolizes the abundant endocannabinoid 2-arachidonoylglycerol (2-AG) to free arachidonic acid (AA) and glycerol (By simi…	SUBCELLULAR LOCATION: Microsome membrane {ECO:0000250|UniProtKB:P07687}; Single-pass type III membrane protein {ECO:0000250|UniProtKB:P07687}. Endoplasmic reticulum membrane {ECO:0000250|UniProtKB:P07687}; Single-pass type III membrane protein {ECO:0000250|UniProtKB:P07687}.	arachidonic acid metabolic process [GO:0019369]; aromatic compound catabolic process [GO:0019439]; cellular aromatic compound metabolic process [GO:0006725]; cellular response to glucocorticoid stimulus [GO:0071385]; diol biosynthetic process [GO:0034312]; epoxide metabolic process [GO:0097176]; liver development [GO:0001889]; response to organic cyclic compound [GO:0014070]; response to toxic su…	endoplasmic reticulum membrane [GO:0005789]; integral component of membrane [GO:0016021]; intracellular membrane-bounded organelle [GO:0043231]; membrane [GO:0016020]; plasma membrane [GO:0005886]	endoplasmic reticulum membrane [GO:0005789]; integral component of membrane [GO:0016021]; intracellular membrane-bounded organelle [GO:0043231]; membrane [GO:0016020]; plasma membrane [GO:0005886]; cis-stilbene-oxide hydrolase activity [GO:0033961]; enzyme binding [GO:0019899]; epoxide hydrolase activity [GO:0004301]; arachidonic acid metabolic process [GO:0019369]; aromatic compound catabolic pr…	cis-stilbene-oxide hydrolase activity [GO:0033961]; enzyme binding [GO:0019899]; epoxide hydrolase activity [GO:0004301]	GO:0001889; GO:0004301; GO:0005789; GO:0005886; GO:0006725; GO:0009636; GO:0014070; GO:0016020; GO:0016021; GO:0019369; GO:0019439; GO:0019899; GO:0033961; GO:0034312; GO:0043231; GO:0071385; GO:0097176	RecName: Full=Epoxide hydrolase 1; AltName: Full=Epoxide hydratase; AltName: Full=Microsomal epoxide hydrolase; Short=mEH - [HYEP_MOUSE]	60.22	1	25	25	410.262	689998294	1.89602e+08	7.12821e+08	7.69409e+08	46	30	53	73	47	31	55	75	455	52.543	8.35303
Q63836	SBP2	Selenium-binding protein 2	FUNCTION: Selenium- and acetaminophen-binding protein which may be involved in the sensing of reactive xenobiotics in the cytoplasm. May be involved in intra-Golgi protein transport (By similarity). {ECO:0000250}.	SUBCELLULAR LOCATION: Nucleus {ECO:0000250}. Cytoplasm, cytosol. Membrane {ECO:0000250}; Peripheral membrane protein {ECO:0000250}. Note=May associate with Golgi membrane. May associate with the membrane of autophagosomes (By similarity). {ECO:0000250}.	protein transport [GO:0015031]	cytosol [GO:0005829]; fibrillar center [GO:0001650]; membrane [GO:0016020]; nucleolus [GO:0005730]	cytosol [GO:0005829]; fibrillar center [GO:0001650]; membrane [GO:0016020]; nucleolus [GO:0005730]; selenium binding [GO:0008430]; protein transport [GO:0015031]	selenium binding [GO:0008430]	GO:0001650; GO:0005730; GO:0005829; GO:0008430; GO:0015031; GO:0016020	RecName: Full=Selenium-binding protein 2; AltName: Full=56 kDa acetaminophen-binding protein; Short=AP56 - [SBP2_MOUSE]	82.2	1	6	30	721.005	2.60266e+09	1.58822e+09	7.92658e+08	7.13587e+08	118	108	58	71	122	111	60	73	472	52.5764	6.17627
Q9ET01	PYGL	Glycogen phosphorylase, liver form	FUNCTION: Phosphorylase is an important allosteric enzyme in carbohydrate metabolism. Enzymes from different sources differ in their regulatory mechanisms and in their natural substrates. However, all known phosphorylases share catalytic and structural properties (By similarity). {ECO:0000250}.		5-phosphoribose 1-diphosphate biosynthetic process [GO:0006015]; glucose homeostasis [GO:0042593]; glycogen catabolic process [GO:0005980]; glycogen metabolic process [GO:0005977]; necroptotic process [GO:0070266]; response to bacterium [GO:0009617]	cytoplasm [GO:0005737]	cytoplasm [GO:0005737]; AMP binding [GO:0016208]; ATP binding [GO:0005524]; bile acid binding [GO:0032052]; carbohydrate binding [GO:0030246]; drug binding [GO:0008144]; glycogen phosphorylase activity [GO:0008184]; identical protein binding [GO:0042802]; linear malto-oligosaccharide phosphorylase activity [GO:0102250]; purine nucleobase binding [GO:0002060]; pyridoxal phosphate binding [GO:00301…	AMP binding [GO:0016208]; ATP binding [GO:0005524]; bile acid binding [GO:0032052]; carbohydrate binding [GO:0030246]; drug binding [GO:0008144]; glycogen phosphorylase activity [GO:0008184]; identical protein binding [GO:0042802]; linear malto-oligosaccharide phosphorylase activity [GO:0102250]; purine nucleobase binding [GO:0002060]; pyridoxal phosphate binding [GO:0030170]; SHG alpha-glucan ph…	GO:0002060; GO:0005524; GO:0005737; GO:0005977; GO:0005980; GO:0006015; GO:0008144; GO:0008184; GO:0009617; GO:0016208; GO:0019842; GO:0030170; GO:0030246; GO:0032052; GO:0042593; GO:0042802; GO:0070266; GO:0102250; GO:0102499	RecName: Full=Glycogen phosphorylase, liver form - [PYGL_MOUSE]	46.94	3	35	35	467.13	4.42167e+08	2.09363e+08	3.67827e+08	344612516	65	47	47	71	67	48	48	73	850	97.401	7.09326
P49429	HPPD	4-hydroxyphenylpyruvate dioxygenase	FUNCTION: Key enzyme in the degradation of tyrosine. {ECO:0000250}.	SUBCELLULAR LOCATION: Cytoplasm {ECO:0000250}. Membrane {ECO:0000250}; Peripheral membrane protein {ECO:0000250}.	L-phenylalanine catabolic process [GO:0006559]; tyrosine catabolic process [GO:0006572]	endoplasmic reticulum [GO:0005783]; endoplasmic reticulum membrane [GO:0005789]; Golgi apparatus [GO:0005794]; Golgi membrane [GO:0000139]	endoplasmic reticulum [GO:0005783]; endoplasmic reticulum membrane [GO:0005789]; Golgi apparatus [GO:0005794]; Golgi membrane [GO:0000139]; 4-hydroxyphenylpyruvate dioxygenase activity [GO:0003868]; metal ion binding [GO:0046872]; L-phenylalanine catabolic process [GO:0006559]; tyrosine catabolic process [GO:0006572]	4-hydroxyphenylpyruvate dioxygenase activity [GO:0003868]; metal ion binding [GO:0046872]	GO:0000139; GO:0003868; GO:0005783; GO:0005789; GO:0005794; GO:0006559; GO:0006572; GO:0046872	RecName: Full=4-hydroxyphenylpyruvate dioxygenase; AltName: Full=4-hydroxyphenylpyruvic acid oxidase; Short=4HPPD; Short=HPD; Short=HPPDase; AltName: Full=F Alloantigen; Short=F protein - [HPPD_MOUSE]	63.1	1	22	22	505.719	1.69179e+09	1.11942e+09	9.8075e+08	1.04631e+09	65	71	42	71	67	73	43	73	393	45.0259	7.06396
Q8BMS1	ECHA	Trifunctional enzyme subunit alpha, mitochondrial	FUNCTION: Mitochondrial trifunctional enzyme catalyzes the last three of the four reactions of the mitochondrial beta-oxidation pathway. The mitochondrial beta-oxidation pathway is the major energy-producing process in tissues and is performed through four consecutive reactions breaking down fatty acids into acetyl-CoA. Among the enzymes involved in this pathway, the trifunctional enzyme exhibits…	SUBCELLULAR LOCATION: Mitochondrion {ECO:0000250|UniProtKB:P40939}. Mitochondrion inner membrane {ECO:0000250|UniProtKB:P40939}. Note=Protein stability and association with mitochondrion inner membrane do not require HADHB. {ECO:0000250|UniProtKB:P40939}.	cardiolipin acyl-chain remodeling [GO:0035965]; fatty acid beta-oxidation [GO:0006635]; response to drug [GO:0042493]; response to insulin [GO:0032868]	mitochondrial fatty acid beta-oxidation multienzyme complex [GO:0016507]; mitochondrial inner membrane [GO:0005743]; mitochondrial nucleoid [GO:0042645]; mitochondrion [GO:0005739]	mitochondrial fatty acid beta-oxidation multienzyme complex [GO:0016507]; mitochondrial inner membrane [GO:0005743]; mitochondrial nucleoid [GO:0042645]; mitochondrion [GO:0005739]; 3-hydroxyacyl-CoA dehydrogenase activity [GO:0003857]; acetyl-CoA C-acyltransferase activity [GO:0003988]; enoyl-CoA hydratase activity [GO:0004300]; fatty-acyl-CoA binding [GO:0000062]; long-chain-3-hydroxyacyl-CoA d…	3-hydroxyacyl-CoA dehydrogenase activity [GO:0003857]; acetyl-CoA C-acyltransferase activity [GO:0003988]; enoyl-CoA hydratase activity [GO:0004300]; fatty-acyl-CoA binding [GO:0000062]; long-chain-3-hydroxyacyl-CoA dehydrogenase activity [GO:0016509]; long-chain-enoyl-CoA hydratase activity [GO:0016508]; NAD binding [GO:0051287]; protein-containing complex binding [GO:0044877]	GO:0000062; GO:0003857; GO:0003988; GO:0004300; GO:0005739; GO:0005743; GO:0006635; GO:0016507; GO:0016508; GO:0016509; GO:0032868; GO:0035965; GO:0042493; GO:0042645; GO:0044877; GO:0051287	RecName: Full=Trifunctional enzyme subunit alpha, mitochondrial; AltName: Full=Monolysocardiolipin acyltransferase; AltName: Full=TP-alpha; Includes: RecName: Full=Long-chain enoyl-CoA hydratase; Includes: RecName: Full=Long chain 3-hydroxyacyl-CoA dehydrogenase; Flags: Precursor - [ECHA_MOUSE]	50.07	1	29	29	556.494	1.02037e+09	5.95261e+08	1.01106e+09	7.89185e+08	91	54	60	69	94	56	62	71	763	82.6175	9.14404
P35700	PRDX1	Peroxiredoxin-1	FUNCTION: Thiol-specific peroxidase that catalyzes the reduction of hydrogen peroxide and organic hydroperoxides to water and alcohols, respectively. Plays a role in cell protection against oxidative stress by detoxifying peroxides and as sensor of hydrogen peroxide-mediated signaling events. Might participate in the signaling cascades of growth factors and tumor necrosis factor-alpha by regulati…	SUBCELLULAR LOCATION: Cytoplasm {ECO:0000250|UniProtKB:Q06830}.	cell population proliferation [GO:0008283]; cell redox homeostasis [GO:0045454]; erythrocyte homeostasis [GO:0034101]; hydrogen peroxide catabolic process [GO:0042744]; leukocyte activation [GO:0045321]; natural killer cell activation [GO:0030101]; natural killer cell mediated cytotoxicity [GO:0042267]; regulation of NIK/NF-kappaB signaling [GO:1901222]; regulation of stress-activated MAPK cascad…	cell [GO:0005623]; cytoplasm [GO:0005737]; cytosol [GO:0005829]; mitochondrial matrix [GO:0005759]; mitochondrion [GO:0005739]; myelin sheath [GO:0043209]; nuclear euchromatin [GO:0005719]; nucleolus [GO:0005730]; nucleus [GO:0005634]; peroxisomal matrix [GO:0005782]	cell [GO:0005623]; cytoplasm [GO:0005737]; cytosol [GO:0005829]; mitochondrial matrix [GO:0005759]; mitochondrion [GO:0005739]; myelin sheath [GO:0043209]; nuclear euchromatin [GO:0005719]; nucleolus [GO:0005730]; nucleus [GO:0005634]; peroxisomal matrix [GO:0005782]; heme binding [GO:0020037]; identical protein binding [GO:0042802]; peroxidase activity [GO:0004601]; peroxiredoxin activity [GO:00…	heme binding [GO:0020037]; identical protein binding [GO:0042802]; peroxidase activity [GO:0004601]; peroxiredoxin activity [GO:0051920]; thioredoxin peroxidase activity [GO:0008379]	GO:0000302; GO:0004601; GO:0005623; GO:0005634; GO:0005719; GO:0005730; GO:0005737; GO:0005739; GO:0005759; GO:0005782; GO:0005829; GO:0006979; GO:0008283; GO:0008379; GO:0019430; GO:0020037; GO:0030101; GO:0032872; GO:0034101; GO:0042267; GO:0042744; GO:0042802; GO:0043209; GO:0045321; GO:0045454; GO:0051920; GO:1901222	RecName: Full=Peroxiredoxin-1; AltName: Full=Macrophage 23 kDa stress protein; AltName: Full=Osteoblast-specific factor 3; Short=OSF-3; AltName: Full=Thioredoxin peroxidase 2; AltName: Full=Thioredoxin-dependent peroxide reductase 2; AltName: Full=Thioredoxin-dependent peroxiredoxin 1 - [PRDX1_MOUSE]	73.37	1	15	18	475.254	4.05798e+09	2.09688e+09	3924642379	3.14668e+09	65	57	43	69	67	59	44	71	199	22.1624	8.11865
O09173	HGD	Homogentisate 1,2-dioxygenase			cellular amino acid metabolic process [GO:0006520]; L-phenylalanine catabolic process [GO:0006559]; tyrosine catabolic process [GO:0006572]	cytoplasm [GO:0005737]	cytoplasm [GO:0005737]; homogentisate 1,2-dioxygenase activity [GO:0004411]; identical protein binding [GO:0042802]; metal ion binding [GO:0046872]; cellular amino acid metabolic process [GO:0006520]; L-phenylalanine catabolic process [GO:0006559]; tyrosine catabolic process [GO:0006572]	homogentisate 1,2-dioxygenase activity [GO:0004411]; identical protein binding [GO:0042802]; metal ion binding [GO:0046872]	GO:0004411; GO:0005737; GO:0006520; GO:0006559; GO:0006572; GO:0042802; GO:0046872	RecName: Full=Homogentisate 1,2-dioxygenase; AltName: Full=Homogentisate oxygenase; AltName: Full=Homogentisic acid oxidase; AltName: Full=Homogentisicase - [HGD_MOUSE]	60.67	1	21	21	426.51	7.60816e+08	3.2739e+08	5.20436e+08	568275244	49	53	39	69	51	55	40	71	445	49.9275	7.23975
P09411	PGK1	Phosphoglycerate kinase 1	FUNCTION: Catalyzes one of the two ATP producing reactions in the glycolytic pathway via the reversible conversion of 1,3-diphosphoglycerate to 3-phosphoglycerate. In addition to its role as a glycolytic enzyme, it seems that PGK-1 acts as a polymerase alpha cofactor protein (primer recognition protein). May play a role in sperm motility. {ECO:0000250|UniProtKB:P00558}.	SUBCELLULAR LOCATION: Cytoplasm {ECO:0000250}.	carbohydrate metabolic process [GO:0005975]; cellular response to hypoxia [GO:0071456]; epithelial cell differentiation [GO:0030855]; gluconeogenesis [GO:0006094]; glycolytic process [GO:0006096]; negative regulation of angiogenesis [GO:0016525]; phosphorylation [GO:0016310]; plasminogen activation [GO:0031639]; positive regulation of oxidative phosphorylation [GO:1903862]	cytosol [GO:0005829]; extracellular space [GO:0005615]; membrane raft [GO:0045121]	cytosol [GO:0005829]; extracellular space [GO:0005615]; membrane raft [GO:0045121]; ADP binding [GO:0043531]; ATP binding [GO:0005524]; phosphoglycerate kinase activity [GO:0004618]; protein-disulfide reductase activity [GO:0047134]; carbohydrate metabolic process [GO:0005975]; cellular response to hypoxia [GO:0071456]; epithelial cell differentiation [GO:0030855]; gluconeogenesis [GO:0006094]; g…	ADP binding [GO:0043531]; ATP binding [GO:0005524]; phosphoglycerate kinase activity [GO:0004618]; protein-disulfide reductase activity [GO:0047134]	GO:0004618; GO:0005524; GO:0005615; GO:0005829; GO:0005975; GO:0006094; GO:0006096; GO:0016310; GO:0016525; GO:0030855; GO:0031639; GO:0043531; GO:0045121; GO:0047134; GO:0071456; GO:1903862	RecName: Full=Phosphoglycerate kinase 1 - [PGK1_MOUSE]	63.07	2	20	20	505.719	1074532419	5.58424e+08	8.04817e+08	6.43148e+08	70	53	58	68	72	55	60	70	417	44.522	7.89893
Q64442	DHSO	Sorbitol dehydrogenase	FUNCTION: Polyol dehydrogenase that catalyzes the reversible NAD(+)-dependent oxidation of various sugar alcohols (By similarity). Is active with D-sorbitol (D-glucitol) leading to the C2-oxidized product D-fructose (PubMed:6852349). Is a key enzyme in the polyol pathway that interconverts glucose and fructose via sorbitol, which constitutes an important alternate route for glucose metabolism (By…	SUBCELLULAR LOCATION: Mitochondrion membrane {ECO:0000269|PubMed:18799757}; Peripheral membrane protein {ECO:0000269|PubMed:18799757}. Cell projection, cilium, flagellum {ECO:0000269|PubMed:18799757}. Note=Associated with mitochondria of the midpiece and near the plasma membrane in the principal piece of the flagellum. Also found in the epididymosome, secreted by the epididymal epithelium and tha…	flagellated sperm motility [GO:0030317]; fructose biosynthetic process [GO:0046370]; L-xylitol catabolic process [GO:0051160]; L-xylitol metabolic process [GO:0051164]; response to cadmium ion [GO:0046686]; response to copper ion [GO:0046688]; response to drug [GO:0042493]; response to hormone [GO:0009725]; response to nutrient levels [GO:0031667]; response to osmotic stress [GO:0006970]; sorbito…	extracellular exosome [GO:0070062]; membrane [GO:0016020]; mitochondrial membrane [GO:0031966]; mitochondrion [GO:0005739]; motile cilium [GO:0031514]	extracellular exosome [GO:0070062]; membrane [GO:0016020]; mitochondrial membrane [GO:0031966]; mitochondrion [GO:0005739]; motile cilium [GO:0031514]; D-xylulose reductase activity [GO:0046526]; identical protein binding [GO:0042802]; L-iditol 2-dehydrogenase activity [GO:0003939]; NAD binding [GO:0051287]; zinc ion binding [GO:0008270]; flagellated sperm motility [GO:0030317]; fructose biosynth…	D-xylulose reductase activity [GO:0046526]; identical protein binding [GO:0042802]; L-iditol 2-dehydrogenase activity [GO:0003939]; NAD binding [GO:0051287]; zinc ion binding [GO:0008270]	GO:0003939; GO:0005739; GO:0006060; GO:0006062; GO:0006970; GO:0008270; GO:0009725; GO:0016020; GO:0030317; GO:0031514; GO:0031667; GO:0031966; GO:0042493; GO:0042802; GO:0046370; GO:0046526; GO:0046686; GO:0046688; GO:0051160; GO:0051164; GO:0051287; GO:0070062	RecName: Full=Sorbitol dehydrogenase; Short=SDH; Short=SORD; AltName: Full=L-iditol 2-dehydrogenase; AltName: Full=Polyol dehydrogenase; AltName: Full=Xylitol dehydrogenase; Short=XDH - [DHSO_MOUSE]	59.1	1	18	18	530.091	2.06871e+09	1.30216e+09	1.05614e+09	1.00059e+09	79	63	51	68	81	65	53	70	357	38.2247	7.02002
P68033	ACTC	Actin, alpha cardiac muscle 1	FUNCTION: Actins are highly conserved proteins that are involved in various types of cell motility and are ubiquitously expressed in all eukaryotic cells.	SUBCELLULAR LOCATION: Cytoplasm, cytoskeleton.	actin filament-based movement [GO:0030048]; actin filament organization [GO:0007015]; actin-mediated cell contraction [GO:0070252]; actin-myosin filament sliding [GO:0033275]; actomyosin structure organization [GO:0031032]; cardiac muscle contraction [GO:0060048]; cardiac muscle tissue morphogenesis [GO:0055008]; cardiac myofibril assembly [GO:0055003]; heart contraction [GO:0060047]; mesenchyme …	actin cytoskeleton [GO:0015629]; actin filament [GO:0005884]; actomyosin, actin portion [GO:0042643]; cell body [GO:0044297]; cytoplasm [GO:0005737]; filopodium [GO:0030175]; glutamatergic synapse [GO:0098978]; I band [GO:0031674]; lamellipodium [GO:0030027]; sarcomere [GO:0030017]; synapse [GO:0045202]	actin cytoskeleton [GO:0015629]; actin filament [GO:0005884]; actomyosin, actin portion [GO:0042643]; cell body [GO:0044297]; cytoplasm [GO:0005737]; filopodium [GO:0030175]; glutamatergic synapse [GO:0098978]; I band [GO:0031674]; lamellipodium [GO:0030027]; sarcomere [GO:0030017]; synapse [GO:0045202]; ATP binding [GO:0005524]; ATPase activity [GO:0016887]; myosin binding [GO:0017022]; actin fi…	ATPase activity [GO:0016887]; ATP binding [GO:0005524]; myosin binding [GO:0017022]	GO:0005524; GO:0005737; GO:0005884; GO:0007015; GO:0010628; GO:0015629; GO:0016887; GO:0017022; GO:0030017; GO:0030027; GO:0030048; GO:0030175; GO:0030240; GO:0031032; GO:0031674; GO:0033275; GO:0042643; GO:0043066; GO:0044297; GO:0045202; GO:0045471; GO:0055003; GO:0055008; GO:0060047; GO:0060048; GO:0070252; GO:0090131; GO:0098978	RecName: Full=Actin, alpha cardiac muscle 1; AltName: Full=Alpha-cardiac actin; Contains: RecName: Full=Actin, alpha cardiac muscle 1, intermediate form; Flags: Precursor - [ACTC_MOUSE]	38.2	4	2	15	489.471	3392095587	2.3289e+09	4.24258e+09	3.34013e+09	55	62	57	67	57	64	59	69	377	41.9919	5.38916
Q8VC30	DHAK	Bifunctional ATP-dependent dihydroxyacetone kinase/FAD-AMP lyase (cyclizing)	FUNCTION: Catalyzes both the phosphorylation of dihydroxyacetone and of glyceraldehyde, and the splitting of ribonucleoside diphosphate-X compounds among which FAD is the best substrate. Represses IFIH1-mediated cellular antiviral response. {ECO:0000250|UniProtKB:F1RKQ4, ECO:0000250|UniProtKB:Q3LXA3, ECO:0000250|UniProtKB:Q4KLZ6}.		carbohydrate phosphorylation [GO:0046835]; cellular carbohydrate metabolic process [GO:0044262]; fructose catabolic process to hydroxyacetone phosphate and glyceraldehyde-3-phosphate [GO:0061624]; glycerol catabolic process [GO:0019563]; glycolytic process through fructose-1-phosphate [GO:0061625]; negative regulation of MDA-5 signaling pathway [GO:0039534]; regulation of innate immune response […	cytosol [GO:0005829]	cytosol [GO:0005829]; ATP binding [GO:0005524]; FAD-AMP lyase (cyclizing) activity [GO:0034012]; glycerone kinase activity [GO:0004371]; metal ion binding [GO:0046872]; triokinase activity [GO:0050354]; carbohydrate phosphorylation [GO:0046835]; cellular carbohydrate metabolic process [GO:0044262]; fructose catabolic process to hydroxyacetone phosphate and glyceraldehyde-3-phosphate [GO:0061624];…	ATP binding [GO:0005524]; FAD-AMP lyase (cyclizing) activity [GO:0034012]; glycerone kinase activity [GO:0004371]; metal ion binding [GO:0046872]; triokinase activity [GO:0050354]	GO:0004371; GO:0005524; GO:0005829; GO:0019563; GO:0034012; GO:0039534; GO:0044262; GO:0045088; GO:0046835; GO:0046872; GO:0050354; GO:0061624; GO:0061625	RecName: Full=Triokinase/FMN cyclase; AltName: Full=Bifunctional ATP-dependent dihydroxyacetone kinase/FAD-AMP lyase (cyclizing); Includes: RecName: Full=ATP-dependent dihydroxyacetone kinase; Short=DHA kinase; AltName: Full=Glycerone kinase; AltName: Full=Triokinase; AltName: Full=Triose kinase; Includes: RecName: Full=FAD-AMP lyase (cyclizing); AltName: Full=FAD-AMP lyase (cyclic FMN forming); …	48.1	1	20	20	416.355	8.3892e+08	4.61639e+08	1.2345e+09	1.04422e+09	49	42	47	67	51	43	48	69	578	59.6534	6.91748
Q9DBT9	M2GD	Dimethylglycine dehydrogenase, mitochondrial	FUNCTION: Catalyzes the demethylation of N,N-dimethylglycine to sarcosine. Also has activity with sarcosine in vitro. {ECO:0000250|UniProtKB:Q63342}.	SUBCELLULAR LOCATION: Mitochondrion {ECO:0000250|UniProtKB:Q63342}.	amino-acid betaine catabolic process [GO:0006579]; choline catabolic process [GO:0042426]; tetrahydrofolate interconversion [GO:0035999]	cytoplasm [GO:0005737]; mitochondrial matrix [GO:0005759]; mitochondrion [GO:0005739]	cytoplasm [GO:0005737]; mitochondrial matrix [GO:0005759]; mitochondrion [GO:0005739]; dimethylglycine dehydrogenase activity [GO:0047865]; flavin adenine dinucleotide binding [GO:0050660]; folic acid binding [GO:0005542]; oxidoreductase activity [GO:0016491]; amino-acid betaine catabolic process [GO:0006579]; choline catabolic process [GO:0042426]; tetrahydrofolate interconversion [GO:0035999]	dimethylglycine dehydrogenase activity [GO:0047865]; flavin adenine dinucleotide binding [GO:0050660]; folic acid binding [GO:0005542]; oxidoreductase activity [GO:0016491]	GO:0005542; GO:0005737; GO:0005739; GO:0005759; GO:0006579; GO:0016491; GO:0035999; GO:0042426; GO:0047865; GO:0050660	RecName: Full=Dimethylglycine dehydrogenase, mitochondrial; AltName: Full=ME2GLYDH; Flags: Precursor - [M2GD_MOUSE]	53.86	1	35	35	499.626	4.57228e+08	2.56565e+08	2.82593e+08	2.86865e+08	79	57	43	67	81	59	44	69	869	97.194	7.88428
P30115	GSTA3	Glutathione S-transferase A3	FUNCTION: Conjugation of reduced glutathione to a wide number of exogenous and endogenous hydrophobic electrophiles. Catalyzes isomerization reactions that contribute to the biosynthesis of steroid hormones. Efficiently catalyze obligatory double-bond isomerizations of delta(5)-androstene-3,17-dione and delta(5)-pregnene-3,20-dione, precursors to testosterone and progesterone, respectively (By si…	SUBCELLULAR LOCATION: Cytoplasm.	aflatoxin catabolic process [GO:0046223]; glutathione metabolic process [GO:0006749]; ureteric bud development [GO:0001657]; xenobiotic metabolic process [GO:0006805]	cytosol [GO:0005829]	cytosol [GO:0005829]; glutathione transferase activity [GO:0004364]; aflatoxin catabolic process [GO:0046223]; glutathione metabolic process [GO:0006749]; ureteric bud development [GO:0001657]; xenobiotic metabolic process [GO:0006805]	glutathione transferase activity [GO:0004364]	GO:0001657; GO:0004364; GO:0005829; GO:0006749; GO:0006805; GO:0046223	RecName: Full=Glutathione S-transferase A3; AltName: Full=GST class-alpha member 3; AltName: Full=Glutathione S-transferase Ya3; AltName: Full=Glutathione S-transferase Yc - [GSTA3_MOUSE]	43.44	1	8	12	595.083	5.92194e+09	3.73835e+09	3.81506e+09	3.13316e+09	100	70	57	66	103	72	59	68	221	25.3443	8.73389
P68372	TBB4B	Tubulin beta-4B chain	FUNCTION: Tubulin is the major constituent of microtubules. It binds two moles of GTP, one at an exchangeable site on the beta chain and one at a non-exchangeable site on the alpha chain.	SUBCELLULAR LOCATION: Cytoplasm, cytoskeleton.	microtubule-based process [GO:0007017]; microtubule cytoskeleton organization [GO:0000226]; mitotic cell cycle [GO:0000278]	cytoplasm [GO:0005737]; microtubule [GO:0005874]; myelin sheath [GO:0043209]; tubulin complex [GO:0045298]	cytoplasm [GO:0005737]; microtubule [GO:0005874]; myelin sheath [GO:0043209]; tubulin complex [GO:0045298]; double-stranded RNA binding [GO:0003725]; GTP binding [GO:0005525]; GTPase activity [GO:0003924]; structural constituent of cytoskeleton [GO:0005200]; microtubule cytoskeleton organization [GO:0000226]; microtubule-based process [GO:0007017]; mitotic cell cycle [GO:0000278]	double-stranded RNA binding [GO:0003725]; GTPase activity [GO:0003924]; GTP binding [GO:0005525]; structural constituent of cytoskeleton [GO:0005200]	GO:0000226; GO:0000278; GO:0003725; GO:0003924; GO:0005200; GO:0005525; GO:0005737; GO:0005874; GO:0007017; GO:0043209; GO:0045298	RecName: Full=Tubulin beta-4B chain; AltName: Full=Tubulin beta-2C chain - [TBB4B_MOUSE]	60.9	1	1	20	495.564	9.68538e+08	4.29442e+08	7.32978e+08	6.88687e+08	68	54	56	66	70	56	58	68	445	49.799	4.89404
P99024	TBB5	Tubulin beta-5 chain	FUNCTION: Tubulin is the major constituent of microtubules. It binds two moles of GTP, one at an exchangeable site on the beta chain and one at a non-exchangeable site on the alpha chain.	SUBCELLULAR LOCATION: Cytoplasm, cytoskeleton {ECO:0000269|PubMed:26637975}.	cellular process [GO:0009987]; microtubule-based process [GO:0007017]; microtubule cytoskeleton organization [GO:0000226]; mitotic cell cycle [GO:0000278]; regulation of synapse organization [GO:0050807]; spindle assembly [GO:0051225]	cell body [GO:0044297]; cytoplasm [GO:0005737]; cytoplasmic ribonucleoprotein granule [GO:0036464]; cytosol [GO:0005829]; membrane raft [GO:0045121]; microtubule [GO:0005874]; nuclear envelope lumen [GO:0005641]; nucleus [GO:0005634]; protein-containing complex [GO:0032991]; tubulin complex [GO:0045298]	cell body [GO:0044297]; cytoplasm [GO:0005737]; cytoplasmic ribonucleoprotein granule [GO:0036464]; cytosol [GO:0005829]; membrane raft [GO:0045121]; microtubule [GO:0005874]; nuclear envelope lumen [GO:0005641]; nucleus [GO:0005634]; protein-containing complex [GO:0032991]; tubulin complex [GO:0045298]; GTP binding [GO:0005525]; GTPase activating protein binding [GO:0032794]; GTPase activity [GO…	GTPase activating protein binding [GO:0032794]; GTPase activity [GO:0003924]; GTP binding [GO:0005525]; MHC class I protein binding [GO:0042288]; protein-containing complex binding [GO:0044877]; protein domain specific binding [GO:0019904]; structural constituent of cytoskeleton [GO:0005200]; ubiquitin protein ligase binding [GO:0031625]	GO:0000226; GO:0000278; GO:0003924; GO:0005200; GO:0005525; GO:0005634; GO:0005641; GO:0005737; GO:0005829; GO:0005874; GO:0007017; GO:0009987; GO:0019904; GO:0031625; GO:0032794; GO:0032991; GO:0036464; GO:0042288; GO:0044297; GO:0044877; GO:0045121; GO:0045298; GO:0050807; GO:0051225	RecName: Full=Tubulin beta-5 chain - [TBB5_MOUSE]	62.84	1	3	19	454.944	8.75254e+08	405935601	7.22784e+08	6.41071e+08	59	45	54	66	61	46	56	68	444	49.639	4.89404
Q99KI0	ACON	Aconitate hydratase, mitochondrial	FUNCTION: Catalyzes the isomerization of citrate to isocitrate via cis-aconitate. {ECO:0000250|UniProtKB:P16276}.	SUBCELLULAR LOCATION: Mitochondrion {ECO:0000250|UniProtKB:P16276}.	citrate metabolic process [GO:0006101]; isocitrate metabolic process [GO:0006102]; liver development [GO:0001889]; response to isolation stress [GO:0035900]; tricarboxylic acid cycle [GO:0006099]	cytosol [GO:0005829]; mitochondrion [GO:0005739]; myelin sheath [GO:0043209]	cytosol [GO:0005829]; mitochondrion [GO:0005739]; myelin sheath [GO:0043209]; 3 iron, 4 sulfur cluster binding [GO:0051538]; 4 iron, 4 sulfur cluster binding [GO:0051539]; aconitate hydratase activity [GO:0003994]; citrate dehydratase activity [GO:0047780]; iron ion binding [GO:0005506]; citrate metabolic process [GO:0006101]; isocitrate metabolic process [GO:0006102]; liver development [GO:00018…	3 iron, 4 sulfur cluster binding [GO:0051538]; 4 iron, 4 sulfur cluster binding [GO:0051539]; aconitate hydratase activity [GO:0003994]; citrate dehydratase activity [GO:0047780]; iron ion binding [GO:0005506]	GO:0001889; GO:0003994; GO:0005506; GO:0005739; GO:0005829; GO:0006099; GO:0006101; GO:0006102; GO:0035900; GO:0043209; GO:0047780; GO:0051538; GO:0051539	RecName: Full=Aconitate hydratase, mitochondrial; Short=Aconitase; AltName: Full=Citrate hydro-lyase; Flags: Precursor - [ACON_MOUSE]	52.31	1	34	34	422.448	5.13715e+08	3.17568e+08	4.97897e+08	405382249	57	40	47	64	59	41	48	66	780	85.41	7.92822
Q7TMM9	TBB2A	Tubulin beta-2A chain	FUNCTION: Tubulin is the major constituent of microtubules. It binds two moles of GTP, one at an exchangeable site on the beta chain and one at a non-exchangeable site on the alpha chain (By similarity). {ECO:0000250}.	SUBCELLULAR LOCATION: Cytoplasm, cytoskeleton {ECO:0000250}.	microtubule-based process [GO:0007017]; microtubule cytoskeleton organization [GO:0000226]; mitotic cell cycle [GO:0000278]; neuron migration [GO:0001764]	cytoplasm [GO:0005737]; microtubule [GO:0005874]	cytoplasm [GO:0005737]; microtubule [GO:0005874]; GTP binding [GO:0005525]; GTPase activity [GO:0003924]; structural constituent of cytoskeleton [GO:0005200]; microtubule cytoskeleton organization [GO:0000226]; microtubule-based process [GO:0007017]; mitotic cell cycle [GO:0000278]; neuron migration [GO:0001764]	GTPase activity [GO:0003924]; GTP binding [GO:0005525]; structural constituent of cytoskeleton [GO:0005200]	GO:0000226; GO:0000278; GO:0001764; GO:0003924; GO:0005200; GO:0005525; GO:0005737; GO:0005874; GO:0007017	RecName: Full=Tubulin beta-2A chain - [TBB2A_MOUSE]	66.52	2	5	20	424.479	8.54724e+08	3.90616e+08	6.92199e+08	6.36169e+08	58	41	46	64	60	42	47	66	445	49.875	4.89404
Q9CPY7	AMPL	Cytosol aminopeptidase	FUNCTION: Presumably involved in the processing and regular turnover of intracellular proteins. Catalyzes the removal of unsubstituted N-terminal amino acids from various peptides (By similarity). {ECO:0000250}.	SUBCELLULAR LOCATION: Cytoplasm {ECO:0000250}.		cytosol [GO:0005829]; midbody [GO:0030496]; mitochondrion [GO:0005739]; nucleoplasm [GO:0005654]; trans-Golgi network [GO:0005802]	cytosol [GO:0005829]; midbody [GO:0030496]; mitochondrion [GO:0005739]; nucleoplasm [GO:0005654]; trans-Golgi network [GO:0005802]; aminopeptidase activity [GO:0004177]; manganese ion binding [GO:0030145]; metalloexopeptidase activity [GO:0008235]; peptidase activity [GO:0008233]	aminopeptidase activity [GO:0004177]; manganese ion binding [GO:0030145]; metalloexopeptidase activity [GO:0008235]; peptidase activity [GO:0008233]	GO:0004177; GO:0005654; GO:0005739; GO:0005802; GO:0005829; GO:0008233; GO:0008235; GO:0030145; GO:0030496	RecName: Full=Cytosol aminopeptidase; AltName: Full=Leucine aminopeptidase 3; Short=LAP-3; AltName: Full=Leucyl aminopeptidase; AltName: Full=Proline aminopeptidase; AltName: Full=Prolyl aminopeptidase - [AMPL_MOUSE]	65.13	1	25	25	461.037	6.43312e+08	3.943e+08	5.68085e+08	4.45301e+08	73	45	45	64	75	46	46	66	519	56.1058	7.72314
O88844	IDHC	Isocitrate dehydrogenase [NADP] cytoplasmic		SUBCELLULAR LOCATION: Cytoplasm, cytosol {ECO:0000250|UniProtKB:P41562}.	2-oxoglutarate metabolic process [GO:0006103]; female gonad development [GO:0008585]; glutathione metabolic process [GO:0006749]; glyoxylate cycle [GO:0006097]; isocitrate metabolic process [GO:0006102]; NADP metabolic process [GO:0006739]; regulation of phospholipid biosynthetic process [GO:0071071]; regulation of phospholipid catabolic process [GO:0060696]; response to organic cyclic compound […	cytoplasm [GO:0005737]; cytosol [GO:0005829]; mitochondrion [GO:0005739]; peroxisome [GO:0005777]	cytoplasm [GO:0005737]; cytosol [GO:0005829]; mitochondrion [GO:0005739]; peroxisome [GO:0005777]; identical protein binding [GO:0042802]; isocitrate dehydrogenase (NADP+) activity [GO:0004450]; isocitrate dehydrogenase activity [GO:0004448]; magnesium ion binding [GO:0000287]; NAD binding [GO:0051287]; NADP binding [GO:0050661]; protein homodimerization activity [GO:0042803]; 2-oxoglutarate meta…	identical protein binding [GO:0042802]; isocitrate dehydrogenase (NADP+) activity [GO:0004450]; isocitrate dehydrogenase activity [GO:0004448]; magnesium ion binding [GO:0000287]; NAD binding [GO:0051287]; NADP binding [GO:0050661]; protein homodimerization activity [GO:0042803]	GO:0000287; GO:0004448; GO:0004450; GO:0005737; GO:0005739; GO:0005777; GO:0005829; GO:0006097; GO:0006099; GO:0006102; GO:0006103; GO:0006739; GO:0006749; GO:0006979; GO:0008585; GO:0014070; GO:0042802; GO:0042803; GO:0048545; GO:0050661; GO:0051287; GO:0060696; GO:0071071	RecName: Full=Isocitrate dehydrogenase [NADP] cytoplasmic; Short=IDH; AltName: Full=Cytosolic NADP-isocitrate dehydrogenase; AltName: Full=IDP; AltName: Full=NADP(+)-specific ICDH; AltName: Full=Oxalosuccinate decarboxylase - [IDHC_MOUSE]	68.12	1	24	25	526.029	1.18495e+09	8.69803e+08	7.22432e+08	1.01968e+09	81	61	54	63	84	63	56	65	414	46.6445	7.1665
Q91YI0	ARLY	Argininosuccinate lyase			ammonia assimilation cycle [GO:0019676]; arginine biosynthetic process via ornithine [GO:0042450]; argininosuccinate metabolic process [GO:0000053]; cellular amino acid metabolic process [GO:0006520]; liver development [GO:0001889]; locomotory behavior [GO:0007626]; post-embryonic development [GO:0009791]; urea cycle [GO:0000050]	cell body fiber [GO:0070852]; cytoplasm [GO:0005737]; endoplasmic reticulum [GO:0005783]; mitochondrial outer membrane [GO:0005741]; neuronal cell body [GO:0043025]; nucleus [GO:0005634]; perikaryon [GO:0043204]; perinuclear region of cytoplasm [GO:0048471]	cell body fiber [GO:0070852]; cytoplasm [GO:0005737]; endoplasmic reticulum [GO:0005783]; mitochondrial outer membrane [GO:0005741]; neuronal cell body [GO:0043025]; nucleus [GO:0005634]; perikaryon [GO:0043204]; perinuclear region of cytoplasm [GO:0048471]; argininosuccinate lyase activity [GO:0004056]; identical protein binding [GO:0042802]; ammonia assimilation cycle [GO:0019676]; arginine bio…	argininosuccinate lyase activity [GO:0004056]; identical protein binding [GO:0042802]	GO:0000050; GO:0000053; GO:0001889; GO:0004056; GO:0005634; GO:0005737; GO:0005741; GO:0005783; GO:0006520; GO:0007626; GO:0009791; GO:0019676; GO:0042450; GO:0042802; GO:0043025; GO:0043204; GO:0048471; GO:0070852	RecName: Full=Argininosuccinate lyase; Short=ASAL; AltName: Full=Arginosuccinase - [ARLY_MOUSE]	50.86	2	24	26	586.959	1.18748e+09	7.23117e+08	7.34726e+08	7.4844e+08	83	84	60	62	86	87	62	64	464	51.7066	6.96143
P68373	TBA1C	Tubulin alpha-1C chain	FUNCTION: Tubulin is the major constituent of microtubules. It binds two moles of GTP, one at an exchangeable site on the beta chain and one at a non-exchangeable site on the alpha chain.	SUBCELLULAR LOCATION: Cytoplasm, cytoskeleton.	microtubule-based process [GO:0007017]; microtubule cytoskeleton organization [GO:0000226]; mitotic cell cycle [GO:0000278]	cytoplasm [GO:0005737]; cytoplasmic microtubule [GO:0005881]; membrane raft [GO:0045121]; microtubule [GO:0005874]; microtubule cytoskeleton [GO:0015630]; nucleus [GO:0005634]	cytoplasm [GO:0005737]; cytoplasmic microtubule [GO:0005881]; membrane raft [GO:0045121]; microtubule [GO:0005874]; microtubule cytoskeleton [GO:0015630]; nucleus [GO:0005634]; GTP binding [GO:0005525]; GTPase activity [GO:0003924]; structural constituent of cytoskeleton [GO:0005200]; microtubule cytoskeleton organization [GO:0000226]; microtubule-based process [GO:0007017]; mitotic cell cycle [G…	GTPase activity [GO:0003924]; GTP binding [GO:0005525]; structural constituent of cytoskeleton [GO:0005200]	GO:0000226; GO:0000278; GO:0003924; GO:0005200; GO:0005525; GO:0005634; GO:0005737; GO:0005874; GO:0005881; GO:0007017; GO:0015630; GO:0045121	RecName: Full=Tubulin alpha-1C chain; AltName: Full=Alpha-tubulin 6; AltName: Full=Alpha-tubulin isotype M-alpha-6; AltName: Full=Tubulin alpha-6 chain; Contains: RecName: Full=Detyrosinated tubulin alpha-1C chain - [TBA1C_MOUSE]	54.57	3	7	17	444.789	9.43411e+08	4.73592e+08	1.11973e+09	7.3215e+08	54	50	54	61	56	52	56	63	449	49.8775	5.09717
Q9DCN2	NB5R3	NADH-cytochrome b5 reductase 3	FUNCTION: Desaturation and elongation of fatty acids, cholesterol biosynthesis, drug metabolism, and, in erythrocyte, methemoglobin reduction. {ECO:0000250}.	SUBCELLULAR LOCATION: [Isoform 1]: Endoplasmic reticulum membrane {ECO:0000250|UniProtKB:P00387}; Lipid-anchor {ECO:0000250|UniProtKB:P00387}; Cytoplasmic side {ECO:0000250|UniProtKB:P00387}. Mitochondrion outer membrane {ECO:0000250|UniProtKB:P00387}; Lipid-anchor {ECO:0000250|UniProtKB:P00387}; Cytoplasmic side {ECO:0000250|UniProtKB:P00387}.; SUBCELLULAR LOCATION: [Isoform 2]: Cytoplasm. Note=…	cholesterol biosynthetic process [GO:0006695]	endoplasmic reticulum membrane [GO:0005789]; lipid droplet [GO:0005811]; mitochondrial inner membrane [GO:0005743]; mitochondrial outer membrane [GO:0005741]	endoplasmic reticulum membrane [GO:0005789]; lipid droplet [GO:0005811]; mitochondrial inner membrane [GO:0005743]; mitochondrial outer membrane [GO:0005741]; ADP binding [GO:0043531]; AMP binding [GO:0016208]; cytochrome-b5 reductase activity, acting on NAD(P)H [GO:0004128]; FAD binding [GO:0071949]; flavin adenine dinucleotide binding [GO:0050660]; NAD binding [GO:0051287]; cholesterol biosynth…	ADP binding [GO:0043531]; AMP binding [GO:0016208]; cytochrome-b5 reductase activity, acting on NAD(P)H [GO:0004128]; FAD binding [GO:0071949]; flavin adenine dinucleotide binding [GO:0050660]; NAD binding [GO:0051287]	GO:0004128; GO:0005741; GO:0005743; GO:0005789; GO:0005811; GO:0006695; GO:0016208; GO:0043531; GO:0050660; GO:0051287; GO:0071949	RecName: Full=NADH-cytochrome b5 reductase 3; Short=B5R; Short=Cytochrome b5 reductase; AltName: Full=Diaphorase-1; Contains: RecName: Full=NADH-cytochrome b5 reductase 3 membrane-bound form; Contains: RecName: Full=NADH-cytochrome b5 reductase 3 soluble form - [NB5R3_MOUSE]	69.77	1	16	16	377.766	8.39548e+08	4.50576e+08	6.54841e+08	5.94099e+08	40	45	40	61	41	46	41	63	301	34.1057	8.38232
Q9D6F9	TBB4A	Tubulin beta-4A chain	FUNCTION: Tubulin is the major constituent of microtubules. It binds two moles of GTP, one at an exchangeable site on the beta chain and one at a non-exchangeable site on the alpha chain.	SUBCELLULAR LOCATION: Cytoplasm, cytoskeleton.	cell projection organization [GO:0030030]; microtubule-based process [GO:0007017]; microtubule cytoskeleton organization [GO:0000226]; mitotic cell cycle [GO:0000278]; negative regulation of microtubule polymerization [GO:0031115]	axoneme [GO:0005930]; cell projection [GO:0042995]; cilium [GO:0005929]; cytoplasm [GO:0005737]; internode region of axon [GO:0033269]; microtubule [GO:0005874]; myelin sheath [GO:0043209]; neuronal cell body [GO:0043025]	axoneme [GO:0005930]; cell projection [GO:0042995]; cilium [GO:0005929]; cytoplasm [GO:0005737]; internode region of axon [GO:0033269]; microtubule [GO:0005874]; myelin sheath [GO:0043209]; neuronal cell body [GO:0043025]; calcium ion binding [GO:0005509]; GTP binding [GO:0005525]; GTPase activity [GO:0003924]; structural constituent of cytoskeleton [GO:0005200]; cell projection organization [GO:…	calcium ion binding [GO:0005509]; GTPase activity [GO:0003924]; GTP binding [GO:0005525]; structural constituent of cytoskeleton [GO:0005200]	GO:0000226; GO:0000278; GO:0003924; GO:0005200; GO:0005509; GO:0005525; GO:0005737; GO:0005874; GO:0005929; GO:0005930; GO:0007017; GO:0030030; GO:0031115; GO:0033269; GO:0042995; GO:0043025; GO:0043209	RecName: Full=Tubulin beta-4A chain; AltName: Full=Tubulin beta-4 chain - [TBB4A_MOUSE]	55.63	1	1	18	444.789	9.18613e+08	3.38394e+08	6.01323e+08	6.24233e+08	61	48	50	60	63	49	52	62	444	49.5539	4.88135
Q9QXE0	HACL1	2-hydroxyacyl-CoA lyase 1	FUNCTION: Peroxisomal 2-OH acyl-CoA lyase involved in the cleavage (C1 removal) reaction in the fatty acid alpha-oxydation in a thiamine pyrophosphate (TPP)-dependent manner (By similarity). Involved in the degradation of 3-methyl-branched fatty acids like phytanic acid and the shortening of 2-hydroxy long-chain fatty acids (By similarity). Plays a significant role in the biosynthesis of heptadec…	SUBCELLULAR LOCATION: Peroxisome {ECO:0000250|UniProtKB:Q9UJ83}.	fatty acid alpha-oxidation [GO:0001561]; fatty acid metabolic process [GO:0006631]; lipid metabolic process [GO:0006629]; methyl-branched fatty acid metabolic process [GO:0097089]; phytanic acid metabolic process [GO:1903512]; protein targeting to peroxisome [GO:0006625]	intracellular membrane-bounded organelle [GO:0043231]; nucleoplasm [GO:0005654]; peroxisome [GO:0005777]	intracellular membrane-bounded organelle [GO:0043231]; nucleoplasm [GO:0005654]; peroxisome [GO:0005777]; carbon-carbon lyase activity [GO:0016830]; cofactor binding [GO:0048037]; identical protein binding [GO:0042802]; lyase activity [GO:0016829]; magnesium ion binding [GO:0000287]; thiamine pyrophosphate binding [GO:0030976]; fatty acid alpha-oxidation [GO:0001561]; fatty acid metabolic process…	carbon-carbon lyase activity [GO:0016830]; cofactor binding [GO:0048037]; identical protein binding [GO:0042802]; lyase activity [GO:0016829]; magnesium ion binding [GO:0000287]; thiamine pyrophosphate binding [GO:0030976]	GO:0000287; GO:0001561; GO:0005654; GO:0005777; GO:0006625; GO:0006629; GO:0006631; GO:0016829; GO:0016830; GO:0030976; GO:0042802; GO:0043231; GO:0048037; GO:0097089; GO:1903512	RecName: Full=2-hydroxyacyl-CoA lyase 1; AltName: Full=2-hydroxyphytanoyl-CoA lyase; Short=2-HPCL; AltName: Full=Phytanoyl-CoA 2-hydroxylase 2 - [HACL1_MOUSE]	50.26	1	22	22	373.704	7.5805e+08	4.53547e+08	6.96249e+08	6.85883e+08	47	41	37	59	48	42	38	61	581	63.6189	6.26514
Q68FD5	CLH1	Clathrin heavy chain 1	FUNCTION: Clathrin is the major protein of the polyhedral coat of coated pits and vesicles. Two different adapter protein complexes link the clathrin lattice either to the plasma membrane or to the trans-Golgi network. Acts as component of the TACC3/ch-TOG/clathrin complex proposed to contribute to stabilization of kinetochore fibers of the mitotic spindle by acting as inter-microtubule bridge. T…	SUBCELLULAR LOCATION: Cytoplasmic vesicle membrane {ECO:0000250}; Peripheral membrane protein {ECO:0000250}; Cytoplasmic side {ECO:0000250}. Membrane, coated pit {ECO:0000250}; Peripheral membrane protein {ECO:0000250}; Cytoplasmic side {ECO:0000250}. Melanosome {ECO:0000250}. Cytoplasm, cytoskeleton, spindle {ECO:0000250|UniProtKB:Q00610}. Note=Cytoplasmic face of coated pits and vesicles. In co…	amyloid-beta clearance by transcytosis [GO:0150093]; autophagy [GO:0006914]; cell division [GO:0051301]; clathrin coat assembly [GO:0048268]; clathrin-dependent endocytosis [GO:0072583]; Golgi organization [GO:0007030]; intracellular protein transport [GO:0006886]; mitotic cell cycle [GO:0000278]; mitotic spindle assembly [GO:0090307]; negative regulation of hyaluronan biosynthetic process [GO:19…	clathrin coat [GO:0030118]; clathrin-coated endocytic vesicle [GO:0045334]; clathrin-coated pit [GO:0005905]; clathrin-coated vesicle [GO:0030136]; clathrin coat of coated pit [GO:0030132]; clathrin coat of trans-Golgi network vesicle [GO:0030130]; clathrin complex [GO:0071439]; cytosol [GO:0005829]; endosome [GO:0005768]; extrinsic component of synaptic vesicle membrane [GO:0098850]; lysosome [G…	clathrin coat [GO:0030118]; clathrin coat of coated pit [GO:0030132]; clathrin coat of trans-Golgi network vesicle [GO:0030130]; clathrin complex [GO:0071439]; clathrin-coated endocytic vesicle [GO:0045334]; clathrin-coated pit [GO:0005905]; clathrin-coated vesicle [GO:0030136]; cytosol [GO:0005829]; endosome [GO:0005768]; extrinsic component of synaptic vesicle membrane [GO:0098850]; lysosome [G…	ankyrin binding [GO:0030506]; clathrin light chain binding [GO:0032051]; disordered domain specific binding [GO:0097718]; double-stranded RNA binding [GO:0003725]; heat shock protein binding [GO:0031072]; low-density lipoprotein particle receptor binding [GO:0050750]; peptide binding [GO:0042277]; protein C-terminus binding [GO:0008022]; protein kinase binding [GO:0019901]; structural molecule ac…	GO:0000278; GO:0003725; GO:0005198; GO:0005739; GO:0005764; GO:0005768; GO:0005819; GO:0005829; GO:0005905; GO:0006886; GO:0006898; GO:0006914; GO:0007030; GO:0008022; GO:0016020; GO:0019901; GO:0030117; GO:0030118; GO:0030130; GO:0030132; GO:0030136; GO:0030315; GO:0030506; GO:0031072; GO:0031523; GO:0031623; GO:0032051; GO:0032991; GO:0033572; GO:0042147; GO:0042277; GO:0042383; GO:0042470; GO:…	RecName: Full=Clathrin heavy chain 1 - [CLH1_MOUSE]	32.12	2	39	40	408.231	1.67086e+08	1.19929e+08	2.32792e+08	1.72523e+08	48	43	52	58	49	44	54	60	1675	191.435	5.69385
P52760	UK114	Ribonuclease UK114	FUNCTION: Catalyzes the hydrolytic deamination of enamine/imine intermediates that form during the course of normal metabolism. May facilitate the release of ammonia from these potentially toxic reactive metabolites, reducing their impact on cellular components. It may act on enamine/imine intermediates formed by several types of pyridoxal-5'-phosphate-dependent dehydratases including L-threonine…	SUBCELLULAR LOCATION: Cytoplasm {ECO:0000250|UniProtKB:P52758}. Nucleus {ECO:0000250|UniProtKB:P52758}. Peroxisome {ECO:0000250|UniProtKB:P52759}. Mitochondrion {ECO:0000250|UniProtKB:P52759}. Note=Mostly cytoplasmic but, in less differentiated cells occasionally nuclear. {ECO:0000250|UniProtKB:P52758}.	brain development [GO:0007420]; G1 to G0 transition [GO:0070314]; kidney development [GO:0001822]; lung development [GO:0030324]; mRNA catabolic process [GO:0006402]; mRNA destabilization [GO:0061157]; negative regulation of epithelial cell proliferation [GO:0050680]; negative regulation of translation [GO:0017148]; organonitrogen compound catabolic process [GO:1901565]; response to lipid [GO:003…	cytoplasm [GO:0005737]; cytosol [GO:0005829]; mitochondrial matrix [GO:0005759]; mitochondrion [GO:0005739]; nucleus [GO:0005634]; peroxisome [GO:0005777]	cytoplasm [GO:0005737]; cytosol [GO:0005829]; mitochondrial matrix [GO:0005759]; mitochondrion [GO:0005739]; nucleus [GO:0005634]; peroxisome [GO:0005777]; deaminase activity [GO:0019239]; endoribonuclease activity, producing 3'-phosphomonoesters [GO:0016892]; identical protein binding [GO:0042802]; ion binding [GO:0043167]; long-chain fatty acid binding [GO:0036041]; mRNA binding [GO:0003729]; t…	deaminase activity [GO:0019239]; endoribonuclease activity, producing 3'-phosphomonoesters [GO:0016892]; identical protein binding [GO:0042802]; ion binding [GO:0043167]; long-chain fatty acid binding [GO:0036041]; mRNA binding [GO:0003729]; transition metal ion binding [GO:0046914]	GO:0001822; GO:0003729; GO:0005634; GO:0005737; GO:0005739; GO:0005759; GO:0005777; GO:0005829; GO:0006402; GO:0007420; GO:0016892; GO:0017148; GO:0019239; GO:0030324; GO:0033993; GO:0036041; GO:0042802; GO:0043167; GO:0046914; GO:0050680; GO:0061157; GO:0070314; GO:1901565; GO:1902074	RecName: Full=2-iminobutanoate/2-iminopropanoate deaminase; AltName: Full=Heat-responsive protein 12; AltName: Full=Reactive intermediate imine deaminase A homolog; AltName: Full=Translation inhibitor L-PSP ribonuclease - [RIDA_MOUSE]	87.41	1	10	10	448.851	4.33412e+09	2625818333	4.06858e+09	2.15805e+09	64	49	51	57	66	51	53	59	135	14.2465	8.67529
P16015	CAH3	Carbonic anhydrase 3	FUNCTION: Reversible hydration of carbon dioxide.	SUBCELLULAR LOCATION: Cytoplasm.	response to bacterium [GO:0009617]; response to ethanol [GO:0045471]; response to oxidative stress [GO:0006979]	cytosol [GO:0005829]	cytosol [GO:0005829]; carbonate dehydratase activity [GO:0004089]; nickel cation binding [GO:0016151]; phosphatase activity [GO:0016791]; zinc ion binding [GO:0008270]; response to bacterium [GO:0009617]; response to ethanol [GO:0045471]; response to oxidative stress [GO:0006979]	carbonate dehydratase activity [GO:0004089]; nickel cation binding [GO:0016151]; phosphatase activity [GO:0016791]; zinc ion binding [GO:0008270]	GO:0004089; GO:0005829; GO:0006979; GO:0008270; GO:0009617; GO:0016151; GO:0016791; GO:0045471	RecName: Full=Carbonic anhydrase 3; AltName: Full=Carbonate dehydratase III; AltName: Full=Carbonic anhydrase III; Short=CA-III - [CAH3_MOUSE]	65.38	1	12	12	625.548	9.35004e+09	4.5412e+09	1.65929e+09	1.44663e+09	113	101	38	56	117	104	39	58	260	29.3476	7.37158
Q91X83	METK1	S-adenosylmethionine synthase isoform type-1	FUNCTION: Catalyzes the formation of S-adenosylmethionine from methionine and ATP. The reaction comprises two steps that are both catalyzed by the same enzyme: formation of S-adenosylmethionine (AdoMet) and triphosphate, and subsequent hydrolysis of the triphosphate. {ECO:0000269|PubMed:8314764}.		methionine catabolic process [GO:0009087]; one-carbon metabolic process [GO:0006730]; protein-containing complex assembly [GO:0065003]; protein homotetramerization [GO:0051289]; S-adenosylmethionine biosynthetic process [GO:0006556]	cytosol [GO:0005829]; nuclear matrix [GO:0016363]	cytosol [GO:0005829]; nuclear matrix [GO:0016363]; ADP binding [GO:0043531]; amino acid binding [GO:0016597]; ATP binding [GO:0005524]; identical protein binding [GO:0042802]; magnesium ion binding [GO:0000287]; methionine adenosyltransferase activity [GO:0004478]; methionine catabolic process [GO:0009087]; one-carbon metabolic process [GO:0006730]; protein homotetramerization [GO:0051289]; prote…	ADP binding [GO:0043531]; amino acid binding [GO:0016597]; ATP binding [GO:0005524]; identical protein binding [GO:0042802]; magnesium ion binding [GO:0000287]; methionine adenosyltransferase activity [GO:0004478]	GO:0000287; GO:0004478; GO:0005524; GO:0005829; GO:0006556; GO:0006730; GO:0009087; GO:0016363; GO:0016597; GO:0042802; GO:0043531; GO:0051289; GO:0065003	RecName: Full=S-adenosylmethionine synthase isoform type-1; Short=AdoMet synthase 1; AltName: Full=Methionine adenosyltransferase 1; Short=MAT 1 - [METK1_MOUSE]	48.23	1	12	14	408.231	1.88454e+09	1.6581e+09	2259293451	2.43453e+09	42	53	51	55	43	55	53	57	396	43.481	5.8208
Q9CZS1	AL1B1	Aldehyde dehydrogenase X, mitochondrial	FUNCTION: ALDHs play a major role in the detoxification of alcohol-derived acetaldehyde. They are involved in the metabolism of corticosteroids, biogenic amines, neurotransmitters, and lipid peroxidation (By similarity). {ECO:0000250}.	SUBCELLULAR LOCATION: Mitochondrion matrix {ECO:0000250}.	ethanol catabolic process [GO:0006068]	intracellular membrane-bounded organelle [GO:0043231]; mitochondrial matrix [GO:0005759]; mitochondrion [GO:0005739]; nucleoplasm [GO:0005654]	intracellular membrane-bounded organelle [GO:0043231]; mitochondrial matrix [GO:0005759]; mitochondrion [GO:0005739]; nucleoplasm [GO:0005654]; aldehyde dehydrogenase (NAD+) activity [GO:0004029]; glyceraldehyde-3-phosphate dehydrogenase (NAD+) (non-phosphorylating) activity [GO:0043878]; ethanol catabolic process [GO:0006068]	aldehyde dehydrogenase (NAD+) activity [GO:0004029]; glyceraldehyde-3-phosphate dehydrogenase (NAD+) (non-phosphorylating) activity [GO:0043878]	GO:0004029; GO:0005654; GO:0005739; GO:0005759; GO:0006068; GO:0043231; GO:0043878	RecName: Full=Aldehyde dehydrogenase X, mitochondrial; AltName: Full=Aldehyde dehydrogenase family 1 member B1; Flags: Precursor - [AL1B1_MOUSE]	62.81	5	24	26	284.34	1.95318e+08	140012758	6.47497e+08	4.64427e+08	19	20	46	55	20	21	47	57	519	57.5165	7.02002
P07901	HS90A	Heat shock protein HSP 90-alpha	FUNCTION: Molecular chaperone that promotes the maturation, structural maintenance and proper regulation of specific target proteins involved for instance in cell cycle control and signal transduction. Undergoes a functional cycle that is linked to its ATPase activity which is essential for its chaperone activity. This cycle probably induces conformational changes in the client proteins, thereby …	SUBCELLULAR LOCATION: Nucleus {ECO:0000269|PubMed:22431752}. Cytoplasm {ECO:0000269|PubMed:11751894, ECO:0000269|PubMed:22431752, ECO:0000269|PubMed:27496612, ECO:0000269|PubMed:27686098}. Melanosome {ECO:0000250|UniProtKB:P07900}. Cell membrane {ECO:0000250|UniProtKB:P07900}.	axon extension [GO:0048675]; cardiac muscle cell apoptotic process [GO:0010659]; cellular response to heat [GO:0034605]; central nervous system neuron axonogenesis [GO:0021955]; chaperone-mediated protein complex assembly [GO:0051131]; establishment of cell polarity [GO:0030010]; neuron migration [GO:0001764]; nitric oxide biosynthetic process [GO:0006809]; positive regulation of cardiac muscle c…	apical plasma membrane [GO:0016324]; axonal growth cone [GO:0044295]; basolateral plasma membrane [GO:0016323]; brush border membrane [GO:0031526]; cell surface [GO:0009986]; collagen-containing extracellular matrix [GO:0062023]; cytoplasm [GO:0005737]; cytosol [GO:0005829]; dendritic growth cone [GO:0044294]; melanosome [GO:0042470]; myelin sheath [GO:0043209]; neuronal cell body [GO:0043025]; n…	apical plasma membrane [GO:0016324]; axonal growth cone [GO:0044295]; basolateral plasma membrane [GO:0016323]; brush border membrane [GO:0031526]; cell surface [GO:0009986]; collagen-containing extracellular matrix [GO:0062023]; cytoplasm [GO:0005737]; cytosol [GO:0005829]; dendritic growth cone [GO:0044294]; melanosome [GO:0042470]; myelin sheath [GO:0043209]; neuron projection [GO:0043005]; ne…	ATPase activity [GO:0016887]; ATP binding [GO:0005524]; CTP binding [GO:0002135]; dATP binding [GO:0032564]; disordered domain specific binding [GO:0097718]; DNA polymerase binding [GO:0070182]; GTPase binding [GO:0051020]; GTP binding [GO:0005525]; histone deacetylase binding [GO:0042826]; identical protein binding [GO:0042802]; ion channel binding [GO:0044325]; mRNA binding [GO:0003729]; nitric…	GO:0001764; GO:0001934; GO:0002134; GO:0002135; GO:0003009; GO:0003729; GO:0005524; GO:0005525; GO:0005634; GO:0005737; GO:0005829; GO:0005886; GO:0006457; GO:0006809; GO:0006986; GO:0007004; GO:0009408; GO:0009409; GO:0009651; GO:0009986; GO:0010592; GO:0010659; GO:0016323; GO:0016324; GO:0016887; GO:0017098; GO:0019903; GO:0021955; GO:0030010; GO:0030235; GO:0030911; GO:0031396; GO:0031526; GO:…	RecName: Full=Heat shock protein HSP 90-alpha; AltName: Full=Heat shock 86 kDa; Short=HSP 86; Short=HSP86; AltName: Full=Tumor-specific transplantation 86 kDa antigen; Short=TSTA - [HS90A_MOUSE]	47.75	1	18	30	383.859	1.3508e+09	6.60697e+08	1.58162e+09	1201884791	51	40	43	55	53	41	44	57	733	84.7348	5.0083
P28271	ACOC	Cytoplasmic aconitate hydratase	FUNCTION: Iron sensor. Binds a 4Fe-4S cluster and functions as aconitase when cellular iron levels are high. Functions as mRNA binding protein that regulates uptake, sequestration and utilization of iron when cellular iron levels are low. Binds to iron-responsive elements (IRES) in target mRNA species when iron levels are low. Binding of a 4Fe-4S cluster precludes RNA binding. {ECO:0000250|UniPro…	SUBCELLULAR LOCATION: Cytoplasm.	cellular iron ion homeostasis [GO:0006879]; citrate metabolic process [GO:0006101]; intestinal absorption [GO:0050892]; post-embryonic development [GO:0009791]; regulation of gene expression [GO:0010468]; regulation of translation [GO:0006417]; response to iron(II) ion [GO:0010040]; tricarboxylic acid cycle [GO:0006099]	cell [GO:0005623]; cytoplasm [GO:0005737]; cytosol [GO:0005829]; endoplasmic reticulum [GO:0005783]; Golgi apparatus [GO:0005794]; intracellular membrane-bounded organelle [GO:0043231]; mitochondrion [GO:0005739]	cell [GO:0005623]; cytoplasm [GO:0005737]; cytosol [GO:0005829]; endoplasmic reticulum [GO:0005783]; Golgi apparatus [GO:0005794]; intracellular membrane-bounded organelle [GO:0043231]; mitochondrion [GO:0005739]; 3 iron, 4 sulfur cluster binding [GO:0051538]; 4 iron, 4 sulfur cluster binding [GO:0051539]; aconitate hydratase activity [GO:0003994]; citrate dehydratase activity [GO:0047780]; iron-…	3 iron, 4 sulfur cluster binding [GO:0051538]; 4 iron, 4 sulfur cluster binding [GO:0051539]; aconitate hydratase activity [GO:0003994]; citrate dehydratase activity [GO:0047780]; iron-responsive element binding [GO:0030350]; iron-sulfur cluster binding [GO:0051536]; metal ion binding [GO:0046872]; mRNA 5'-UTR binding [GO:0048027]; RNA binding [GO:0003723]	GO:0003723; GO:0003994; GO:0005623; GO:0005737; GO:0005739; GO:0005783; GO:0005794; GO:0005829; GO:0006099; GO:0006101; GO:0006417; GO:0006879; GO:0009791; GO:0010040; GO:0010468; GO:0030350; GO:0043231; GO:0046872; GO:0047780; GO:0048027; GO:0050892; GO:0051536; GO:0051538; GO:0051539	RecName: Full=Cytoplasmic aconitate hydratase; Short=Aconitase; AltName: Full=Citrate hydro-lyase; AltName: Full=Iron regulatory protein 1; Short=IRP1; AltName: Full=Iron-responsive element-binding protein 1; Short=IRE-BP 1 - [ACOC_MOUSE]	43.87	1	32	33	424.479	3.2893e+08	2.00976e+08	2.70229e+08	2.19626e+08	67	45	42	55	69	46	43	57	889	98.0635	7.50342
P14211	CALR	Calreticulin	FUNCTION: Calcium-binding chaperone that promotes folding, oligomeric assembly and quality control in the endoplasmic reticulum (ER) via the calreticulin/calnexin cycle. This lectin interacts transiently with almost all of the monoglucosylated glycoproteins that are synthesized in the ER. Interacts with the DNA-binding domain of NR3C1 and mediates its nuclear export. Involved in maternal gene exp…	SUBCELLULAR LOCATION: Endoplasmic reticulum lumen {ECO:0000255|PROSITE-ProRule:PRU10138, ECO:0000269|PubMed:8418194}. Cytoplasmic granule {ECO:0000269|PubMed:8418194}. Sarcoplasmic reticulum lumen {ECO:0000250|UniProtKB:P28491}. Note=Associated with the lytic granules in the cytolytic T-lymphocytes.	cardiac muscle cell differentiation [GO:0055007]; cellular response to lithium ion [GO:0071285]; cellular senescence [GO:0090398]; cortical actin cytoskeleton organization [GO:0030866]; endoplasmic reticulum unfolded protein response [GO:0030968]; negative regulation of cell cycle arrest [GO:0071157]; negative regulation of intracellular steroid hormone receptor signaling pathway [GO:0033144]; ne…	acrosomal vesicle [GO:0001669]; cell surface [GO:0009986]; collagen-containing extracellular matrix [GO:0062023]; cytoplasm [GO:0005737]; cytosol [GO:0005829]; endoplasmic reticulum [GO:0005783]; endoplasmic reticulum lumen [GO:0005788]; endoplasmic reticulum membrane [GO:0005789]; endoplasmic reticulum quality control compartment [GO:0044322]; external side of plasma membrane [GO:0009897]; extra…	acrosomal vesicle [GO:0001669]; cell surface [GO:0009986]; collagen-containing extracellular matrix [GO:0062023]; cytoplasm [GO:0005737]; cytosol [GO:0005829]; endoplasmic reticulum [GO:0005783]; endoplasmic reticulum lumen [GO:0005788]; endoplasmic reticulum membrane [GO:0005789]; endoplasmic reticulum quality control compartment [GO:0044322]; external side of plasma membrane [GO:0009897]; extra…	androgen receptor binding [GO:0050681]; calcium ion binding [GO:0005509]; carbohydrate binding [GO:0030246]; hormone binding [GO:0042562]; integrin binding [GO:0005178]; iron ion binding [GO:0005506]; mRNA binding [GO:0003729]; peptide binding [GO:0042277]; ubiquitin protein ligase binding [GO:0031625]; unfolded protein binding [GO:0051082]	GO:0000122; GO:0001669; GO:0002502; GO:0003729; GO:0005178; GO:0005506; GO:0005509; GO:0005576; GO:0005615; GO:0005634; GO:0005635; GO:0005737; GO:0005783; GO:0005788; GO:0005789; GO:0005790; GO:0005794; GO:0005829; GO:0005844; GO:0006457; GO:0006611; GO:0007283; GO:0008284; GO:0009897; GO:0009986; GO:0010595; GO:0010628; GO:0016020; GO:0016529; GO:0017148; GO:0030246; GO:0030866; GO:0030968; GO:…	RecName: Full=Calreticulin; AltName: Full=CRP55; AltName: Full=Calregulin; AltName: Full=Endoplasmic reticulum resident protein 60; Short=ERp60; AltName: Full=HACBP; Flags: Precursor - [CALR_MOUSE]	61.06	1	19	19	442.758	1.20012e+09	6.70445e+08	1.17634e+09	9.89427e+08	61	45	58	54	63	46	60	56	416	47.9649	4.48779
P68368	TBA4A	Tubulin alpha-4A chain	FUNCTION: Tubulin is the major constituent of microtubules. It binds two moles of GTP, one at an exchangeable site on the beta chain and one at a non-exchangeable site on the alpha chain.	SUBCELLULAR LOCATION: Cytoplasm, cytoskeleton.	microtubule-based process [GO:0007017]; microtubule cytoskeleton organization [GO:0000226]; mitotic cell cycle [GO:0000278]	cytoplasm [GO:0005737]; cytoskeleton [GO:0005856]; microtubule [GO:0005874]; microtubule cytoskeleton [GO:0015630]	cytoplasm [GO:0005737]; cytoskeleton [GO:0005856]; microtubule [GO:0005874]; microtubule cytoskeleton [GO:0015630]; enzyme binding [GO:0019899]; GTP binding [GO:0005525]; GTPase activity [GO:0003924]; protein kinase binding [GO:0019901]; structural constituent of cytoskeleton [GO:0005200]; microtubule cytoskeleton organization [GO:0000226]; microtubule-based process [GO:0007017]; mitotic cell cyc…	enzyme binding [GO:0019899]; GTPase activity [GO:0003924]; GTP binding [GO:0005525]; protein kinase binding [GO:0019901]; structural constituent of cytoskeleton [GO:0005200]	GO:0000226; GO:0000278; GO:0003924; GO:0005200; GO:0005525; GO:0005737; GO:0005856; GO:0005874; GO:0007017; GO:0015630; GO:0019899; GO:0019901	RecName: Full=Tubulin alpha-4A chain; AltName: Full=Alpha-tubulin 4; AltName: Full=Alpha-tubulin isotype M-alpha-4; AltName: Full=Tubulin alpha-4 chain - [TBA4A_MOUSE]	51.56	2	7	17	426.51	8.32617e+08	4.52502e+08	9.82662e+08	6.26737e+08	55	49	52	54	57	51	54	56	448	49.8924	5.05908
Q91V92	ACLY	ATP-citrate synthase	FUNCTION: Catalyzes the cleavage of citrate into oxaloacetate and acetyl-CoA, the latter serving as common substrate for de novo cholesterol and fatty acid synthesis. {ECO:0000269|PubMed:25450640}.	SUBCELLULAR LOCATION: Cytoplasm, cytosol {ECO:0000250|UniProtKB:P53396}.	acetyl-CoA biosynthetic process [GO:0006085]; acetyl-CoA metabolic process [GO:0006084]; citrate metabolic process [GO:0006101]; fatty acid biosynthetic process [GO:0006633]; lipid biosynthetic process [GO:0008610]; oxaloacetate metabolic process [GO:0006107]	cytosol [GO:0005829]; mitochondrion [GO:0005739]; nucleoplasm [GO:0005654]; plasma membrane [GO:0005886]	cytosol [GO:0005829]; mitochondrion [GO:0005739]; nucleoplasm [GO:0005654]; plasma membrane [GO:0005886]; ATP binding [GO:0005524]; ATP citrate synthase activity [GO:0003878]; cofactor binding [GO:0048037]; metal ion binding [GO:0046872]; acetyl-CoA biosynthetic process [GO:0006085]; acetyl-CoA metabolic process [GO:0006084]; citrate metabolic process [GO:0006101]; fatty acid biosynthetic process…	ATP binding [GO:0005524]; ATP citrate synthase activity [GO:0003878]; cofactor binding [GO:0048037]; metal ion binding [GO:0046872]	GO:0003878; GO:0005524; GO:0005654; GO:0005739; GO:0005829; GO:0005886; GO:0006084; GO:0006085; GO:0006101; GO:0006107; GO:0006633; GO:0008610; GO:0046872; GO:0048037	RecName: Full=ATP-citrate synthase; AltName: Full=ATP-citrate (pro-S-)-lyase; AltName: Full=Citrate cleavage enzyme - [ACLY_MOUSE]	32.91	1	29	29	337.146	1.72046e+08	7.00165e+07	1.65952e+08	1.65914e+08	40	30	42	54	41	31	43	56	1091	119.651	7.44482
Q8BH00	AL8A1	Aldehyde dehydrogenase family 8 member A1	FUNCTION: Catalyzes the NAD-dependent oxidation of 2-aminomuconic semialdehyde of the kynurenine metabolic pathway in L-tryptophan degradation. {ECO:0000250|UniProtKB:Q9H2A2}.	SUBCELLULAR LOCATION: Cytoplasm {ECO:0000269|PubMed:12519776}.	9-cis-retinoic acid biosynthetic process [GO:0042904]; L-kynurenine catabolic process [GO:0097053]; retinal metabolic process [GO:0042574]; retinoic acid metabolic process [GO:0042573]	cytoplasm [GO:0005737]	cytoplasm [GO:0005737]; aminomuconate-semialdehyde dehydrogenase activity [GO:0047102]; retinal dehydrogenase activity [GO:0001758]; 9-cis-retinoic acid biosynthetic process [GO:0042904]; L-kynurenine catabolic process [GO:0097053]; retinal metabolic process [GO:0042574]; retinoic acid metabolic process [GO:0042573]	aminomuconate-semialdehyde dehydrogenase activity [GO:0047102]; retinal dehydrogenase activity [GO:0001758]	GO:0001758; GO:0005737; GO:0042573; GO:0042574; GO:0042904; GO:0047102; GO:0097053	RecName: Full=2-aminomuconic semialdehyde dehydrogenase; AltName: Full=Aldehyde dehydrogenase family 8 member A1; AltName: Full=Retinal dehydrogenase 4 - [AL8A1_MOUSE]	67.15	1	25	25	463.068	1276665881	8.35238e+08	4.37435e+08	7.78802e+08	67	61	47	53	69	63	48	55	487	53.6295	7.54736
Q91X77	CY250	Cytochrome P450 2C50	FUNCTION: Metabolizes arachidonic acid to several midchain and omega-terminal hydroxyeicosatetraenoic acids (HETE). {ECO:0000269|PubMed:15102943}.	SUBCELLULAR LOCATION: Endoplasmic reticulum membrane {ECO:0000269|PubMed:15102943}; Peripheral membrane protein {ECO:0000269|PubMed:15102943}. Microsome membrane {ECO:0000269|PubMed:15102943}; Peripheral membrane protein {ECO:0000269|PubMed:15102943}.	arachidonic acid metabolic process [GO:0019369]; epoxygenase P450 pathway [GO:0019373]; exogenous drug catabolic process [GO:0042738]; linoleic acid metabolic process [GO:0043651]; organic acid metabolic process [GO:0006082]; oxidation-reduction process [GO:0055114]; xenobiotic metabolic process [GO:0006805]	cytoplasm [GO:0005737]; endoplasmic reticulum membrane [GO:0005789]; intracellular membrane-bounded organelle [GO:0043231]	cytoplasm [GO:0005737]; endoplasmic reticulum membrane [GO:0005789]; intracellular membrane-bounded organelle [GO:0043231]; arachidonic acid epoxygenase activity [GO:0008392]; aromatase activity [GO:0070330]; heme binding [GO:0020037]; iron ion binding [GO:0005506]; linoleic acid epoxygenase activity [GO:0071614]; oxidoreductase activity, acting on paired donors, with incorporation or reduction o…	arachidonic acid epoxygenase activity [GO:0008392]; aromatase activity [GO:0070330]; heme binding [GO:0020037]; iron ion binding [GO:0005506]; linoleic acid epoxygenase activity [GO:0071614]; oxidoreductase activity, acting on paired donors, with incorporation or reduction of molecular oxygen, reduced flavin or flavoprotein as one donor, and incorporation of one atom of oxygen [GO:0016712]; stero…	GO:0005506; GO:0005737; GO:0005789; GO:0006082; GO:0006805; GO:0008392; GO:0008395; GO:0016712; GO:0019369; GO:0019373; GO:0020037; GO:0042738; GO:0043231; GO:0043651; GO:0055114; GO:0070330; GO:0071614	RecName: Full=Cytochrome P450 2C50; AltName: Full=CYPIIC50 - [CY250_MOUSE]	55.1	1	6	24	416.355	8.67504e+08	7.88238e+08	5.86282e+08	7.48985e+08	65	55	32	53	67	57	33	55	490	55.7288	7.88428
P11725	OTC	Ornithine carbamoyltransferase, mitochondrial		SUBCELLULAR LOCATION: Mitochondrion matrix.	ammonia homeostasis [GO:0097272]; anion homeostasis [GO:0055081]; arginine biosynthetic process via ornithine [GO:0042450]; citrulline biosynthetic process [GO:0019240]; liver development [GO:0001889]; midgut development [GO:0007494]; ornithine catabolic process [GO:0006593]; ornithine metabolic process [GO:0006591]; response to biotin [GO:0070781]; response to insulin [GO:0032868]; response to z…	cytoplasm [GO:0005737]; intracellular membrane-bounded organelle [GO:0043231]; mitochondrial inner membrane [GO:0005743]; mitochondrial matrix [GO:0005759]; mitochondrion [GO:0005739]	cytoplasm [GO:0005737]; intracellular membrane-bounded organelle [GO:0043231]; mitochondrial inner membrane [GO:0005743]; mitochondrial matrix [GO:0005759]; mitochondrion [GO:0005739]; amino acid binding [GO:0016597]; identical protein binding [GO:0042802]; ornithine carbamoyltransferase activity [GO:0004585]; phosphate ion binding [GO:0042301]; phospholipid binding [GO:0005543]; ammonia homeosta…	amino acid binding [GO:0016597]; identical protein binding [GO:0042802]; ornithine carbamoyltransferase activity [GO:0004585]; phosphate ion binding [GO:0042301]; phospholipid binding [GO:0005543]	GO:0000050; GO:0001889; GO:0004585; GO:0005543; GO:0005737; GO:0005739; GO:0005743; GO:0005759; GO:0006591; GO:0006593; GO:0007494; GO:0010043; GO:0016597; GO:0019240; GO:0032868; GO:0042301; GO:0042450; GO:0042802; GO:0043231; GO:0055081; GO:0070781; GO:0097272	RecName: Full=Ornithine carbamoyltransferase, mitochondrial; AltName: Full=Ornithine transcarbamylase; Short=OTCase; Flags: Precursor - [OTC_MOUSE]	46.05	1	19	19	452.913	2788799475	1.39873e+09	1.64477e+09	1.27695e+09	59	62	50	52	61	64	52	54	354	39.7396	8.73389
P11679	K2C8	Keratin, type II cytoskeletal 8	FUNCTION: Together with KRT19, helps to link the contractile apparatus to dystrophin at the costameres of striated muscle. {ECO:0000250}.	SUBCELLULAR LOCATION: Cytoplasm {ECO:0000250}. Nucleus, nucleoplasm {ECO:0000250}. Nucleus matrix {ECO:0000250}.	cell differentiation involved in embryonic placenta development [GO:0060706]; cell morphogenesis involved in differentiation [GO:0000904]; extrinsic apoptotic signaling pathway [GO:0097191]; hepatocyte apoptotic process [GO:0097284]; multicellular organism development [GO:0007275]; response to hydrostatic pressure [GO:0051599]; response to other organism [GO:0051707]; sarcomere organization [GO:0…	apicolateral plasma membrane [GO:0016327]; cell-cell junction [GO:0005911]; cell periphery [GO:0071944]; costamere [GO:0043034]; cytoplasm [GO:0005737]; dystrophin-associated glycoprotein complex [GO:0016010]; intermediate filament [GO:0005882]; intermediate filament cytoskeleton [GO:0045111]; keratin filament [GO:0045095]; nuclear matrix [GO:0016363]; nucleoplasm [GO:0005654]; sarcolemma [GO:004…	apicolateral plasma membrane [GO:0016327]; cell periphery [GO:0071944]; cell-cell junction [GO:0005911]; costamere [GO:0043034]; cytoplasm [GO:0005737]; dystrophin-associated glycoprotein complex [GO:0016010]; intermediate filament [GO:0005882]; intermediate filament cytoskeleton [GO:0045111]; keratin filament [GO:0045095]; nuclear matrix [GO:0016363]; nucleoplasm [GO:0005654]; sarcolemma [GO:004…	protein-containing complex binding [GO:0044877]; scaffold protein binding [GO:0097110]	GO:0000904; GO:0005654; GO:0005737; GO:0005882; GO:0005911; GO:0007275; GO:0016010; GO:0016327; GO:0016363; GO:0030018; GO:0033209; GO:0042383; GO:0043034; GO:0044877; GO:0045095; GO:0045111; GO:0045214; GO:0051599; GO:0051707; GO:0060706; GO:0071944; GO:0097110; GO:0097191; GO:0097284	RecName: Full=Keratin, type II cytoskeletal 8; AltName: Full=Cytokeratin endo A; AltName: Full=Cytokeratin-8; Short=CK-8; AltName: Full=Keratin-8; Short=K8; AltName: Full=Type-II keratin Kb8 - [K2C8_MOUSE]	50.41	2	21	27	359.487	3.66349e+08	4.58596e+08	7.50509e+08	5.05169e+08	38	39	48	52	39	40	49	54	490	54.5315	5.8208
P06151	LDHA	L-lactate dehydrogenase A chain		SUBCELLULAR LOCATION: Cytoplasm.	cellular response to extracellular stimulus [GO:0031668]; glucose catabolic process to lactate via pyruvate [GO:0019661]; lactate biosynthetic process from pyruvate [GO:0019244]	cytosol [GO:0005829]; mitochondrion [GO:0005739]; sperm fibrous sheath [GO:0035686]	cytosol [GO:0005829]; mitochondrion [GO:0005739]; sperm fibrous sheath [GO:0035686]; identical protein binding [GO:0042802]; L-lactate dehydrogenase activity [GO:0004459]; lactate dehydrogenase activity [GO:0004457]; cellular response to extracellular stimulus [GO:0031668]; glucose catabolic process to lactate via pyruvate [GO:0019661]; lactate biosynthetic process from pyruvate [GO:0019244]	identical protein binding [GO:0042802]; lactate dehydrogenase activity [GO:0004457]; L-lactate dehydrogenase activity [GO:0004459]	GO:0004457; GO:0004459; GO:0005739; GO:0005829; GO:0019244; GO:0019661; GO:0031668; GO:0035686; GO:0042802	RecName: Full=L-lactate dehydrogenase A chain; Short=LDH-A; AltName: Full=LDH muscle subunit; Short=LDH-M - [LDHA_MOUSE]	52.41	3	19	19	389.952	2.3117e+09	1749584885	2.85362e+09	1.72446e+09	51	43	46	52	53	44	47	54	332	36.4752	7.73779
Q8K2B3	SDHA	Succinate dehydrogenase [ubiquinone] flavoprotein subunit, mitochondrial	FUNCTION: Flavoprotein (FP) subunit of succinate dehydrogenase (SDH) that is involved in complex II of the mitochondrial electron transport chain and is responsible for transferring electrons from succinate to ubiquinone (coenzyme Q). Can act as a tumor suppressor. {ECO:0000250|UniProtKB:P31040}.	SUBCELLULAR LOCATION: Mitochondrion inner membrane {ECO:0000250|UniProtKB:Q0QF01}; Peripheral membrane protein {ECO:0000250|UniProtKB:Q0QF01}; Matrix side {ECO:0000250|UniProtKB:Q0QF01}.	mitochondrial electron transport, succinate to ubiquinone [GO:0006121]; nervous system development [GO:0007399]; oxidation-reduction process [GO:0055114]; respiratory electron transport chain [GO:0022904]; succinate metabolic process [GO:0006105]; tricarboxylic acid cycle [GO:0006099]	mitochondrial inner membrane [GO:0005743]; mitochondrial respiratory chain complex II, succinate dehydrogenase complex (ubiquinone) [GO:0005749]; mitochondrion [GO:0005739]; myelin sheath [GO:0043209]; nucleolus [GO:0005730]	mitochondrial inner membrane [GO:0005743]; mitochondrial respiratory chain complex II, succinate dehydrogenase complex (ubiquinone) [GO:0005749]; mitochondrion [GO:0005739]; myelin sheath [GO:0043209]; nucleolus [GO:0005730]; electron transfer activity [GO:0009055]; flavin adenine dinucleotide binding [GO:0050660]; oxidoreductase activity [GO:0016491]; succinate dehydrogenase (ubiquinone) activit…	electron transfer activity [GO:0009055]; flavin adenine dinucleotide binding [GO:0050660]; oxidoreductase activity [GO:0016491]; succinate dehydrogenase (ubiquinone) activity [GO:0008177]; succinate dehydrogenase activity [GO:0000104]	GO:0000104; GO:0005730; GO:0005739; GO:0005743; GO:0005749; GO:0006099; GO:0006105; GO:0006121; GO:0007399; GO:0008177; GO:0009055; GO:0016491; GO:0022904; GO:0043209; GO:0050660; GO:0055114	RecName: Full=Succinate dehydrogenase [ubiquinone] flavoprotein subunit, mitochondrial; AltName: Full=Flavoprotein subunit of complex II; Short=Fp; Flags: Precursor - [SDHA_MOUSE]	54.67	1	25	25	434.634	478714306	3.95313e+08	3.90302e+08	3.03449e+08	73	49	40	52	75	51	41	54	664	72.5392	7.37158
Q8BFZ3	ACTBL	Beta-actin-like protein 2	FUNCTION: Actins are highly conserved proteins that are involved in various types of cell motility and are ubiquitously expressed in all eukaryotic cells. {ECO:0000250}.	SUBCELLULAR LOCATION: Cytoplasm, cytoskeleton {ECO:0000250}.	synaptic vesicle endocytosis [GO:0048488]	actin filament [GO:0005884]; cytoplasm [GO:0005737]; glutamatergic synapse [GO:0098978]; presynapse [GO:0098793]; synapse [GO:0045202]	actin filament [GO:0005884]; cytoplasm [GO:0005737]; glutamatergic synapse [GO:0098978]; presynapse [GO:0098793]; synapse [GO:0045202]; ATP binding [GO:0005524]; structural constituent of postsynaptic actin cytoskeleton [GO:0098973]; synaptic vesicle endocytosis [GO:0048488]	ATP binding [GO:0005524]; structural constituent of postsynaptic actin cytoskeleton [GO:0098973]	GO:0005524; GO:0005737; GO:0005884; GO:0045202; GO:0048488; GO:0098793; GO:0098973; GO:0098978	RecName: Full=Beta-actin-like protein 2; AltName: Full=Kappa-actin - [ACTBL_MOUSE]	23.94	1	1	8	377.766	2.57718e+09	8.87082e+08	2.58529e+09	2.46859e+09	44	46	45	51	45	47	46	53	376	41.977	5.49072
Q8VCN5	CGL	Cystathionine gamma-lyase	FUNCTION: Catalyzes the last step in the trans-sulfuration pathway from methionine to cysteine. Has broad substrate specificity. Converts cystathionine to cysteine, ammonia and 2-oxobutanoate. Converts two cysteine molecules to lanthionine and hydrogen sulfide. Can also accept homocysteine as substrate. Specificity depends on the levels of the endogenous substrates. Generates the endogenous signa…	SUBCELLULAR LOCATION: Cytoplasm {ECO:0000250}.	cellular response to leukemia inhibitory factor [GO:1990830]; cysteine biosynthetic process [GO:0019344]; cysteine biosynthetic process via cystathionine [GO:0019343]; glutathione metabolic process [GO:0006749]; homocysteine metabolic process [GO:0050667]; hydrogen sulfide biosynthetic process [GO:0070814]; negative regulation of apoptotic process [GO:0043066]; negative regulation of apoptotic si…	cytoplasm [GO:0005737]; cytosol [GO:0005829]	cytoplasm [GO:0005737]; cytosol [GO:0005829]; calmodulin binding [GO:0005516]; carbon-sulfur lyase activity [GO:0016846]; cystathionine beta-lyase activity [GO:0004121]; cystathionine gamma-lyase activity [GO:0004123]; identical protein binding [GO:0042802]; L-cysteine desulfhydrase activity [GO:0080146]; L-cystine L-cysteine-lyase (deaminating) [GO:0044540]; pyridoxal phosphate binding [GO:00301…	calmodulin binding [GO:0005516]; carbon-sulfur lyase activity [GO:0016846]; cystathionine beta-lyase activity [GO:0004121]; cystathionine gamma-lyase activity [GO:0004123]; identical protein binding [GO:0042802]; L-cysteine desulfhydrase activity [GO:0080146]; L-cystine L-cysteine-lyase (deaminating) [GO:0044540]; pyridoxal phosphate binding [GO:0030170]	GO:0004121; GO:0004123; GO:0005516; GO:0005737; GO:0005829; GO:0006749; GO:0008285; GO:0016846; GO:0018272; GO:0019343; GO:0019344; GO:0019346; GO:0030170; GO:0030308; GO:0042802; GO:0043066; GO:0043123; GO:0044524; GO:0044540; GO:0050667; GO:0051092; GO:0051289; GO:0070814; GO:0080146; GO:1904831; GO:1990830; GO:2001234	RecName: Full=Cystathionine gamma-lyase; AltName: Full=Cysteine-protein sulfhydrase; AltName: Full=Gamma-cystathionase - [CGL_MOUSE]	55.28	1	19	19	314.805	5.99703e+08	3.51114e+08	8.54278e+08	9.21912e+08	29	30	45	51	30	31	46	53	398	43.5392	7.6499
Q8VC12	HUTU	Urocanate hydratase			histidine catabolic process [GO:0006548]; histidine catabolic process to glutamate and formamide [GO:0019556]; histidine catabolic process to glutamate and formate [GO:0019557]	cytosol [GO:0005829]	cytosol [GO:0005829]; urocanate hydratase activity [GO:0016153]; histidine catabolic process [GO:0006548]; histidine catabolic process to glutamate and formamide [GO:0019556]; histidine catabolic process to glutamate and formate [GO:0019557]	urocanate hydratase activity [GO:0016153]	GO:0005829; GO:0006548; GO:0016153; GO:0019556; GO:0019557	RecName: Full=Urocanate hydratase; Short=Urocanase; AltName: Full=Imidazolonepropionate hydrolase - [HUTU_MOUSE]	42.46	1	23	23	426.51	8.80279e+08	4.98794e+08	6.65325e+08	5.19105e+08	60	55	44	51	62	57	45	53	676	74.5426	7.53271
Q9D0F9	PGM1	Phosphoglucomutase-1	FUNCTION: This enzyme participates in both the breakdown and synthesis of glucose. {ECO:0000250}.	SUBCELLULAR LOCATION: Cytoplasm {ECO:0000250}.	galactose catabolic process [GO:0019388]; glucose metabolic process [GO:0006006]; glycogen biosynthetic process [GO:0005978]	cytoplasm [GO:0005737]; cytosol [GO:0005829]; Z disc [GO:0030018]	cytoplasm [GO:0005737]; cytosol [GO:0005829]; Z disc [GO:0030018]; magnesium ion binding [GO:0000287]; phosphoglucomutase activity [GO:0004614]; galactose catabolic process [GO:0019388]; glucose metabolic process [GO:0006006]; glycogen biosynthetic process [GO:0005978]	magnesium ion binding [GO:0000287]; phosphoglucomutase activity [GO:0004614]	GO:0000287; GO:0004614; GO:0005737; GO:0005829; GO:0005978; GO:0006006; GO:0019388; GO:0030018	RecName: Full=Phosphoglucomutase-1; Short=PGM 1; AltName: Full=Glucose phosphomutase 1; AltName: Full=Phosphoglucomutase-2 - [PGM1_MOUSE]	62.99	2	26	26	424.479	8.75299e+08	5.46491e+08	4.68431e+08	6.24338e+08	60	55	43	51	62	57	44	53	562	61.3796	6.56592
Q91VA0	ACSM1	Acyl-coenzyme A synthetase ACSM1, mitochondrial	FUNCTION: Catalyzes the activation of fatty acids by CoA to produce an acyl-CoA, the first step in fatty acid metabolism (PubMed:11470804, PubMed:12709059). Capable of activating medium-chain fatty acids (e.g. butyric (C4) to decanoic (C10) acids), and certain carboxylate-containing xenobiotics, e.g. benzoate (PubMed:11470804, PubMed:12709059). Also catalyzes the activation of lipoate to lipoyl-n…	SUBCELLULAR LOCATION: Mitochondrion matrix {ECO:0000269|PubMed:11470804}. Mitochondrion {ECO:0000269|PubMed:12709059}.	acyl-CoA metabolic process [GO:0006637]; fatty acid biosynthetic process [GO:0006633]	mitochondrial matrix [GO:0005759]; mitochondrion [GO:0005739]	mitochondrial matrix [GO:0005759]; mitochondrion [GO:0005739]; acyl-CoA ligase activity [GO:0003996]; ATP binding [GO:0005524]; benzoate-CoA ligase activity [GO:0018858]; butyrate-CoA ligase activity [GO:0047760]; decanoate-CoA ligase activity [GO:0102391]; fatty acid ligase activity [GO:0015645]; fatty-acyl-CoA synthase activity [GO:0004321]; GTP binding [GO:0005525]; metal ion binding [GO:00468…	acyl-CoA ligase activity [GO:0003996]; ATP binding [GO:0005524]; benzoate-CoA ligase activity [GO:0018858]; butyrate-CoA ligase activity [GO:0047760]; decanoate-CoA ligase activity [GO:0102391]; fatty acid ligase activity [GO:0015645]; fatty-acyl-CoA synthase activity [GO:0004321]; GTP binding [GO:0005525]; metal ion binding [GO:0046872]	GO:0003996; GO:0004321; GO:0005524; GO:0005525; GO:0005739; GO:0005759; GO:0006633; GO:0006637; GO:0015645; GO:0018858; GO:0046872; GO:0047760; GO:0102391	RecName: Full=Acyl-coenzyme A synthetase ACSM1, mitochondrial; AltName: Full=Acyl-CoA synthetase medium-chain family member 1; AltName: Full=Benzoate--CoA ligase; AltName: Full=Butyrate--CoA ligase 1; AltName: Full=Butyryl-coenzyme A synthetase 1; AltName: Full=Lipoate-activating enzyme; AltName: Full=Middle-chain acyl-CoA synthetase 1; Flags: Precursor - [ACSM1_MOUSE]	49.21	1	19	19	398.076	9.58281e+08	3.47044e+08	2.74991e+08	4.16128e+08	57	55	33	51	59	57	34	53	573	64.719	7.1665
P50544	ACADV	Very long-chain specific acyl-CoA dehydrogenase, mitochondrial	FUNCTION: Active toward esters of long-chain and very long chain fatty acids such as palmitoyl-CoA, myristoyl-CoA and stearoyl-CoA. Can accommodate substrate acyl chain lengths as long as 24 carbons, but shows little activity for substrates of less than 12 carbons (By similarity). {ECO:0000250}.	SUBCELLULAR LOCATION: Mitochondrion inner membrane.	epithelial cell differentiation [GO:0030855]; fatty acid beta-oxidation [GO:0006635]; fatty acid beta-oxidation using acyl-CoA dehydrogenase [GO:0033539]; fatty acid catabolic process [GO:0009062]; negative regulation of fatty acid biosynthetic process [GO:0045717]; negative regulation of fatty acid oxidation [GO:0046322]; regulation of cholesterol metabolic process [GO:0090181]; response to cold…	cytosol [GO:0005829]; mitochondrial inner membrane [GO:0005743]; mitochondrial membrane [GO:0031966]; mitochondrial nucleoid [GO:0042645]; mitochondrion [GO:0005739]; nucleolus [GO:0005730]; nucleoplasm [GO:0005654]	cytosol [GO:0005829]; mitochondrial inner membrane [GO:0005743]; mitochondrial membrane [GO:0031966]; mitochondrial nucleoid [GO:0042645]; mitochondrion [GO:0005739]; nucleolus [GO:0005730]; nucleoplasm [GO:0005654]; acyl-CoA dehydrogenase activity [GO:0003995]; fatty-acyl-CoA binding [GO:0000062]; flavin adenine dinucleotide binding [GO:0050660]; long-chain-acyl-CoA dehydrogenase activity [GO:00…	acyl-CoA dehydrogenase activity [GO:0003995]; fatty-acyl-CoA binding [GO:0000062]; flavin adenine dinucleotide binding [GO:0050660]; long-chain-acyl-CoA dehydrogenase activity [GO:0004466]; very-long-chain-acyl-CoA dehydrogenase activity [GO:0017099]	GO:0000062; GO:0001659; GO:0003995; GO:0004466; GO:0005654; GO:0005730; GO:0005739; GO:0005743; GO:0005829; GO:0006635; GO:0009062; GO:0009409; GO:0017099; GO:0030855; GO:0031966; GO:0033539; GO:0042645; GO:0045717; GO:0046322; GO:0050660; GO:0090181	RecName: Full=Very long-chain specific acyl-CoA dehydrogenase, mitochondrial; AltName: Full=MVLCAD; Short=VLCAD; Flags: Precursor - [ACADV_MOUSE]	52.13	1	27	27	430.572	3.72113e+08	2.63339e+08	3.55648e+08	2.85658e+08	56	50	56	50	58	52	58	52	656	70.8307	8.74854
P08003	PDIA4	Protein disulfide-isomerase A4		SUBCELLULAR LOCATION: Endoplasmic reticulum lumen {ECO:0000250|UniProtKB:P13667}. Melanosome {ECO:0000250|UniProtKB:P13667}.	cell redox homeostasis [GO:0045454]; chaperone-mediated protein folding [GO:0061077]; positive regulation of protein folding [GO:1903334]; protein folding [GO:0006457]; response to endoplasmic reticulum stress [GO:0034976]	cell [GO:0005623]; cell surface [GO:0009986]; endoplasmic reticulum [GO:0005783]; endoplasmic reticulum chaperone complex [GO:0034663]; endoplasmic reticulum lumen [GO:0005788]; extracellular space [GO:0005615]; melanosome [GO:0042470]; smooth endoplasmic reticulum [GO:0005790]	cell [GO:0005623]; cell surface [GO:0009986]; endoplasmic reticulum [GO:0005783]; endoplasmic reticulum chaperone complex [GO:0034663]; endoplasmic reticulum lumen [GO:0005788]; extracellular space [GO:0005615]; melanosome [GO:0042470]; smooth endoplasmic reticulum [GO:0005790]; peptide disulfide oxidoreductase activity [GO:0015037]; protein disulfide isomerase activity [GO:0003756]; cell redox h…	peptide disulfide oxidoreductase activity [GO:0015037]; protein disulfide isomerase activity [GO:0003756]	GO:0003756; GO:0005615; GO:0005623; GO:0005783; GO:0005788; GO:0005790; GO:0006457; GO:0009986; GO:0015037; GO:0034663; GO:0034976; GO:0042470; GO:0045454; GO:0061077; GO:1903334	RecName: Full=Protein disulfide-isomerase A4; AltName: Full=Endoplasmic reticulum resident protein 72; Short=ER protein 72; Short=ERp-72; Short=ERp72; Flags: Precursor - [PDIA4_MOUSE]	52.35	2	27	28	381.828	4.24376e+08	3.09132e+08	8.00685e+08	2.92952e+08	49	36	53	50	51	37	55	52	638	71.9375	5.31299
P11352	GPX1	Glutathione peroxidase 1	FUNCTION: Protects the hemoglobin in erythrocytes from oxidative breakdown. In platelets, plays a crucial role of glutathione peroxidase in the arachidonic acid metabolism (PubMed:9195979). {ECO:0000269|PubMed:9195979}.	SUBCELLULAR LOCATION: Cytoplasm.	angiogenesis involved in wound healing [GO:0060055]; blood vessel endothelial cell migration [GO:0043534]; cell population proliferation [GO:0008283]; cell redox homeostasis [GO:0045454]; cellular response to glucose stimulus [GO:0071333]; endothelial cell development [GO:0001885]; fat cell differentiation [GO:0045444]; glutathione metabolic process [GO:0006749]; heart contraction [GO:0060047]; h…	cell [GO:0005623]; cytoplasm [GO:0005737]; cytosol [GO:0005829]; Lewy body [GO:0097413]; mitochondrion [GO:0005739]; nucleus [GO:0005634]	cell [GO:0005623]; cytoplasm [GO:0005737]; cytosol [GO:0005829]; Lewy body [GO:0097413]; mitochondrion [GO:0005739]; nucleus [GO:0005634]; glutathione peroxidase activity [GO:0004602]; peroxidase activity [GO:0004601]; SH3 domain binding [GO:0017124]; angiogenesis involved in wound healing [GO:0060055]; blood vessel endothelial cell migration [GO:0043534]; cell population proliferation [GO:000828…	glutathione peroxidase activity [GO:0004602]; peroxidase activity [GO:0004601]; SH3 domain binding [GO:0017124]	GO:0000302; GO:0001659; GO:0001885; GO:0002862; GO:0004601; GO:0004602; GO:0005623; GO:0005634; GO:0005737; GO:0005739; GO:0005829; GO:0006629; GO:0006641; GO:0006749; GO:0006979; GO:0007605; GO:0008283; GO:0009410; GO:0009609; GO:0009611; GO:0009636; GO:0009650; GO:0010269; GO:0010332; GO:0014902; GO:0017124; GO:0018158; GO:0033194; GO:0033599; GO:0040029; GO:0042311; GO:0042542; GO:0042744; GO:…	RecName: Full=Glutathione peroxidase 1; Short=GPx-1; Short=GSHPx-1; AltName: Full=Cellular glutathione peroxidase; AltName: Full=Selenium-dependent glutathione peroxidase 1 - [GPX1_MOUSE]	79.6	1	15	15	444.789	1.4842e+09	8.64901e+08	7.8701e+08	6.63295e+08	66	62	41	50	68	64	42	52	201	22.3162	7.21045
Q9D819	IPYR	Inorganic pyrophosphatase		SUBCELLULAR LOCATION: Cytoplasm {ECO:0000250}.	phosphate-containing compound metabolic process [GO:0006796]	cytoplasm [GO:0005737]	cytoplasm [GO:0005737]; inorganic diphosphatase activity [GO:0004427]; magnesium ion binding [GO:0000287]; pyrophosphatase activity [GO:0016462]; phosphate-containing compound metabolic process [GO:0006796]	inorganic diphosphatase activity [GO:0004427]; magnesium ion binding [GO:0000287]; pyrophosphatase activity [GO:0016462]	GO:0000287; GO:0004427; GO:0005737; GO:0006796; GO:0016462	RecName: Full=Inorganic pyrophosphatase; AltName: Full=Pyrophosphate phospho-hydrolase; Short=PPase - [IPYR_MOUSE]	71.28	1	15	15	326.991	6.14488e+08	3.56439e+08	6.90891e+08	5.1791e+08	39	33	39	50	40	34	40	52	289	32.6462	5.60498
Q9QXX4	CMC2	Calcium-binding mitochondrial carrier protein Aralar2	FUNCTION: Mitochondrial and calcium-binding carrier that catalyzes the calcium-dependent exchange of cytoplasmic glutamate with mitochondrial aspartate across the mitochondrial inner membrane. May have a function in the urea cycle. {ECO:0000250|UniProtKB:Q9UJS0}.	SUBCELLULAR LOCATION: Mitochondrion inner membrane {ECO:0000250|UniProtKB:Q9UJS0}; Multi-pass membrane protein {ECO:0000250|UniProtKB:Q9UJS0}.	aspartate transmembrane transport [GO:0015810]; ATP biosynthetic process [GO:0006754]; cellular respiration [GO:0045333]; L-glutamate transmembrane transport [GO:0015813]; malate-aspartate shuttle [GO:0043490]; response to calcium ion [GO:0051592]	integral component of membrane [GO:0016021]; mitochondrial inner membrane [GO:0005743]; mitochondrion [GO:0005739]	integral component of membrane [GO:0016021]; mitochondrial inner membrane [GO:0005743]; mitochondrion [GO:0005739]; ATP transmembrane transporter activity [GO:0005347]; calcium ion binding [GO:0005509]; identical protein binding [GO:0042802]; L-aspartate transmembrane transporter activity [GO:0015183]; L-glutamate transmembrane transporter activity [GO:0005313]; aspartate transmembrane transport …	ATP transmembrane transporter activity [GO:0005347]; calcium ion binding [GO:0005509]; identical protein binding [GO:0042802]; L-aspartate transmembrane transporter activity [GO:0015183]; L-glutamate transmembrane transporter activity [GO:0005313]	GO:0005313; GO:0005347; GO:0005509; GO:0005739; GO:0005743; GO:0006754; GO:0015183; GO:0015810; GO:0015813; GO:0016021; GO:0042802; GO:0043490; GO:0045333; GO:0051592	RecName: Full=Calcium-binding mitochondrial carrier protein Aralar2; AltName: Full=Citrin; AltName: Full=Mitochondrial aspartate glutamate carrier 2; AltName: Full=Solute carrier family 25 member 13 - [CMC2_MOUSE]	53.55	1	25	31	436.665	4.15414e+08	2.29156e+08	206961448	1.90235e+08	70	58	37	50	72	60	38	52	676	74.4198	8.60205
Q9Z2I8	SUCB2	Succinyl-CoA ligase [GDP-forming] subunit beta, mitochondrial	FUNCTION: GTP-specific succinyl-CoA synthetase functions in the citric acid cycle (TCA), coupling the hydrolysis of succinyl-CoA to the synthesis of GTP and thus represents the only step of substrate-level phosphorylation in the TCA. The beta subunit provides nucleotide specificity of the enzyme and binds the substrate succinate, while the binding sites for coenzyme A and phosphate are found in t…	SUBCELLULAR LOCATION: Mitochondrion {ECO:0000255|HAMAP-Rule:MF_03221}.	succinate metabolic process [GO:0006105]; succinyl-CoA metabolic process [GO:0006104]; tricarboxylic acid cycle [GO:0006099]	mitochondrion [GO:0005739]; plasma membrane [GO:0005886]; protein-containing complex [GO:0032991]; succinate-CoA ligase complex [GO:0042709]; succinate-CoA ligase complex (GDP-forming) [GO:0045244]	mitochondrion [GO:0005739]; plasma membrane [GO:0005886]; protein-containing complex [GO:0032991]; succinate-CoA ligase complex [GO:0042709]; succinate-CoA ligase complex (GDP-forming) [GO:0045244]; ATP binding [GO:0005524]; GDP binding [GO:0019003]; GTP binding [GO:0005525]; magnesium ion binding [GO:0000287]; protein-containing complex binding [GO:0044877]; succinate-CoA ligase (ADP-forming) ac…	ATP binding [GO:0005524]; GDP binding [GO:0019003]; GTP binding [GO:0005525]; magnesium ion binding [GO:0000287]; protein-containing complex binding [GO:0044877]; succinate-CoA ligase (ADP-forming) activity [GO:0004775]; succinate-CoA ligase (GDP-forming) activity [GO:0004776]; succinate-semialdehyde dehydrogenase (NAD+) activity [GO:0004777]	GO:0000287; GO:0004775; GO:0004776; GO:0004777; GO:0005524; GO:0005525; GO:0005739; GO:0005886; GO:0006099; GO:0006104; GO:0006105; GO:0019003; GO:0032991; GO:0042709; GO:0044877; GO:0045244	RecName: Full=Succinate--CoA ligase [GDP-forming] subunit beta, mitochondrial; AltName: Full=GTP-specific succinyl-CoA synthetase subunit beta; Short=G-SCS; Short=GTPSCS; AltName: Full=Succinyl-CoA synthetase beta-G chain; Short=SCS-betaG; Flags: Precursor - [SUCB2_MOUSE]	51.04	1	19	19	383.859	7.65787e+08	3.58291e+08	6.88499e+08	367646170	51	46	43	49	53	47	44	51	433	46.8107	7.02002
Q3UQ44	IQGA2	Ras GTPase-activating-like protein IQGAP2	FUNCTION: Binds to activated CDC42 and RAC1 but does not seem to stimulate their GTPase activity. Associates with calmodulin.		Arp2/3 complex-mediated actin nucleation [GO:0034314]; regulation of GTPase activity [GO:0043087]; thrombin-activated receptor signaling pathway [GO:0070493]	cell surface [GO:0009986]; cytoplasm [GO:0005737]; filopodium [GO:0030175]; lamellipodium [GO:0030027]; microtubule [GO:0005874]; microvillus [GO:0005902]	cell surface [GO:0009986]; cytoplasm [GO:0005737]; filopodium [GO:0030175]; lamellipodium [GO:0030027]; microtubule [GO:0005874]; microvillus [GO:0005902]; actin filament binding [GO:0051015]; Arp2/3 complex binding [GO:0071933]; calmodulin binding [GO:0005516]; phosphatidylinositol-3,4,5-trisphosphate binding [GO:0005547]; Rac GTPase binding [GO:0048365]; Rho GTPase binding [GO:0017048]; Arp2/3 …	actin filament binding [GO:0051015]; Arp2/3 complex binding [GO:0071933]; calmodulin binding [GO:0005516]; phosphatidylinositol-3,4,5-trisphosphate binding [GO:0005547]; Rac GTPase binding [GO:0048365]; Rho GTPase binding [GO:0017048]	GO:0005516; GO:0005547; GO:0005737; GO:0005874; GO:0005902; GO:0009986; GO:0017048; GO:0030027; GO:0030175; GO:0034314; GO:0043087; GO:0048365; GO:0051015; GO:0070493; GO:0071933	RecName: Full=Ras GTPase-activating-like protein IQGAP2 - [IQGA2_MOUSE]	37.14	2	44	44	312.774	1.55924e+08	2.40411e+08	1.06942e+08	1.17997e+08	39	27	39	49	40	28	40	51	1575	180.416	5.64307
O35488	S27A2	Very long-chain acyl-CoA synthetase	FUNCTION: Acyl CoA synthetase that activates long-chain and very long-chain fatty acids (VLCFAs) by catalyzing the formation of fatty acyl-CoA (PubMed:15699031, PubMed:20530735). Can also activate branched-chain fatty acids such as phytanic acid and pristanic acid (By similarity). Does not activate C24 bile acids, cholate and chenodeoxycholate (By similarity). In vitro, activates 3-alpha,7-alpha,…	SUBCELLULAR LOCATION: Endoplasmic reticulum membrane {ECO:0000250|UniProtKB:O14975}; Multi-pass membrane protein {ECO:0000255}. Peroxisome membrane {ECO:0000269|PubMed:20530735}; Peripheral membrane protein {ECO:0000250|UniProtKB:P97524}. Cell membrane {ECO:0000269|PubMed:20530735}; Multi-pass membrane protein {ECO:0000255}. Microsome {ECO:0000250|UniProtKB:P97524}.	bile acid biosynthetic process [GO:0006699]; fatty acid alpha-oxidation [GO:0001561]; fatty acid beta-oxidation [GO:0006635]; fatty acid transport [GO:0015908]; long-chain fatty acid import into cell [GO:0044539]; long-chain fatty acid metabolic process [GO:0001676]; methyl-branched fatty acid metabolic process [GO:0097089]; very long-chain fatty acid catabolic process [GO:0042760]; very long-cha…	endoplasmic reticulum [GO:0005783]; endoplasmic reticulum lumen [GO:0005788]; endoplasmic reticulum membrane [GO:0005789]; integral component of endoplasmic reticulum membrane [GO:0030176]; integral component of peroxisomal membrane [GO:0005779]; intracellular membrane-bounded organelle [GO:0043231]; mitochondrion [GO:0005739]; peroxisomal membrane [GO:0005778]; peroxisome [GO:0005777]; plasma me…	endoplasmic reticulum [GO:0005783]; endoplasmic reticulum lumen [GO:0005788]; endoplasmic reticulum membrane [GO:0005789]; integral component of endoplasmic reticulum membrane [GO:0030176]; integral component of peroxisomal membrane [GO:0005779]; intracellular membrane-bounded organelle [GO:0043231]; mitochondrion [GO:0005739]; peroxisomal membrane [GO:0005778]; peroxisome [GO:0005777]; plasma me…	acyl-CoA ligase activity [GO:0003996]; arachidonate-CoA ligase activity [GO:0047676]; ATP binding [GO:0005524]; cholate-CoA ligase activity [GO:0047747]; decanoate-CoA ligase activity [GO:0102391]; enzyme binding [GO:0019899]; fatty acid transmembrane transporter activity [GO:0015245]; long-chain fatty acid-CoA ligase activity [GO:0004467]; long-chain fatty acid transporter activity [GO:0005324];…	GO:0000038; GO:0001561; GO:0001676; GO:0003996; GO:0004467; GO:0005324; GO:0005524; GO:0005739; GO:0005777; GO:0005778; GO:0005779; GO:0005783; GO:0005788; GO:0005789; GO:0005886; GO:0006635; GO:0006699; GO:0015245; GO:0015908; GO:0019899; GO:0030176; GO:0031957; GO:0042760; GO:0043231; GO:0044539; GO:0047676; GO:0047747; GO:0050197; GO:0070251; GO:0097089; GO:0102391	RecName: Full=Very long-chain acyl-CoA synthetase; Short=VLACS; Short=VLCS; AltName: Full=Arachidonate--CoA ligase; AltName: Full=Fatty acid transport protein 2; Short=FATP-2; AltName: Full=Fatty-acid-coenzyme A ligase, very long-chain 1; AltName: Full=Long-chain-fatty-acid--CoA ligase; AltName: Full=Phytanate--CoA ligase; AltName: Full=Solute carrier family 27 member 2; AltName: Full=THCA-CoA li…	46.45	1	29	29	363.549	619771585	3.12625e+08	4.65564e+08	4.23847e+08	50	43	37	49	52	44	38	51	620	70.3775	8.89502
Q8JZR0	ACSL5	Long-chain-fatty-acid--CoA ligase 5	FUNCTION: Catalyzes the conversion of long-chain fatty acids to their active form acyl-CoAs for both synthesis of cellular lipids, and degradation via beta-oxidation (By similarity). ACSL5 may activate fatty acids from exogenous sources for the synthesis of triacylglycerol destined for intracellular storage (By similarity). It was suggested that it may also stimulate fatty acid oxidation (By simi…	SUBCELLULAR LOCATION: Mitochondrion {ECO:0000250|UniProtKB:Q9ULC5}. Endoplasmic reticulum {ECO:0000250|UniProtKB:Q9ULC5}. Mitochondrion outer membrane {ECO:0000250}; Single-pass type III membrane protein {ECO:0000250}. Endoplasmic reticulum membrane {ECO:0000250}; Single-pass type III membrane protein {ECO:0000250}. Cell membrane {ECO:0000250|UniProtKB:Q9ULC5}.	fatty acid transport [GO:0015908]; long-chain fatty acid metabolic process [GO:0001676]; long-chain fatty-acyl-CoA biosynthetic process [GO:0035338]; phospholipid biosynthetic process [GO:0008654]; positive regulation of fatty acid beta-oxidation [GO:0032000]; positive regulation of long-chain fatty acid import across plasma membrane [GO:0010747]; positive regulation of triglyceride biosynthetic …	endoplasmic reticulum [GO:0005783]; endoplasmic reticulum membrane [GO:0005789]; integral component of membrane [GO:0016021]; mitochondrial inner membrane [GO:0005743]; mitochondrial outer membrane [GO:0005741]; mitochondrion [GO:0005739]; nucleolus [GO:0005730]; nucleoplasm [GO:0005654]; plasma membrane [GO:0005886]	endoplasmic reticulum [GO:0005783]; endoplasmic reticulum membrane [GO:0005789]; integral component of membrane [GO:0016021]; mitochondrial inner membrane [GO:0005743]; mitochondrial outer membrane [GO:0005741]; mitochondrion [GO:0005739]; nucleolus [GO:0005730]; nucleoplasm [GO:0005654]; plasma membrane [GO:0005886]; acyl-CoA ligase activity [GO:0003996]; arachidonate-CoA ligase activity [GO:004…	acyl-CoA ligase activity [GO:0003996]; arachidonate-CoA ligase activity [GO:0047676]; ATP binding [GO:0005524]; decanoate-CoA ligase activity [GO:0102391]; long-chain fatty acid-CoA ligase activity [GO:0004467]	GO:0001676; GO:0003996; GO:0004467; GO:0005524; GO:0005654; GO:0005730; GO:0005739; GO:0005741; GO:0005743; GO:0005783; GO:0005789; GO:0005886; GO:0008654; GO:0010747; GO:0010867; GO:0015908; GO:0016021; GO:0032000; GO:0035338; GO:0047676; GO:0102391; GO:2001236	RecName: Full=Long-chain-fatty-acid--CoA ligase 5; AltName: Full=Arachidonate--CoA ligase; AltName: Full=Long-chain acyl-CoA synthetase 5; Short=LACS 5 - [ACSL5_MOUSE]	48.02	2	23	26	326.991	6.69833e+08	5.0388e+08	526119880	5.0876e+08	47	32	33	49	48	33	34	51	683	76.1575	7.09326
P05784	K1C18	Keratin, type I cytoskeletal 18	FUNCTION: When phosphorylated, plays a role in filament reorganization. Involved in the delivery of mutated CFTR to the plasma membrane. Involved in the uptake of thrombin-antithrombin complexes by hepatic cells (By similarity). Together with KRT8, is involved in interleukin-6 (IL-6)-mediated barrier protection. {ECO:0000250, ECO:0000269|PubMed:17213200}.	SUBCELLULAR LOCATION: Nucleus matrix {ECO:0000250}. Nucleus, nucleolus {ECO:0000250}. Cytoplasm {ECO:0000250}.	extrinsic apoptotic signaling pathway [GO:0097191]; Golgi to plasma membrane CFTR protein transport [GO:0043000]; hepatocyte apoptotic process [GO:0097284]; intermediate filament cytoskeleton organization [GO:0045104]; negative regulation of apoptotic process [GO:0043066]; tumor necrosis factor-mediated signaling pathway [GO:0033209]	cell periphery [GO:0071944]; centriolar satellite [GO:0034451]; cytoplasm [GO:0005737]; cytosol [GO:0005829]; intermediate filament [GO:0005882]; keratin filament [GO:0045095]; microtubule organizing center [GO:0005815]; nuclear matrix [GO:0016363]; nucleolus [GO:0005730]	cell periphery [GO:0071944]; centriolar satellite [GO:0034451]; cytoplasm [GO:0005737]; cytosol [GO:0005829]; intermediate filament [GO:0005882]; keratin filament [GO:0045095]; microtubule organizing center [GO:0005815]; nuclear matrix [GO:0016363]; nucleolus [GO:0005730]; scaffold protein binding [GO:0097110]; structural molecule activity [GO:0005198]; extrinsic apoptotic signaling pathway [GO:0…	scaffold protein binding [GO:0097110]; structural molecule activity [GO:0005198]	GO:0005198; GO:0005730; GO:0005737; GO:0005815; GO:0005829; GO:0005882; GO:0016363; GO:0033209; GO:0034451; GO:0043000; GO:0043066; GO:0045095; GO:0045104; GO:0071944; GO:0097110; GO:0097191; GO:0097284	RecName: Full=Keratin, type I cytoskeletal 18; AltName: Full=Cytokeratin endo B; Short=Keratin D; AltName: Full=Cytokeratin-18; Short=CK-18; AltName: Full=Keratin-18; Short=K18 - [K1C18_MOUSE]	62.65	2	22	25	343.239	4.75661e+08	7.15527e+08	1.03885e+09	8.07537e+08	33	37	51	48	34	38	53	49	423	47.5092	5.32568
P01027	CO3	Complement C3	FUNCTION: C3 plays a central role in the activation of the complement system. Its processing by C3 convertase is the central reaction in both classical and alternative complement pathways. After activation C3b can bind covalently, via its reactive thioester, to cell surface carbohydrates or immune aggregates.; FUNCTION: Derived from proteolytic degradation of complement C3, C3a anaphylatoxin is a…	SUBCELLULAR LOCATION: Secreted.	amyloid-beta clearance [GO:0097242]; blood coagulation [GO:0007596]; cell surface receptor signaling pathway involved in cell-cell signaling [GO:1905114]; complement activation [GO:0006956]; complement activation, alternative pathway [GO:0006957]; complement activation, classical pathway [GO:0006958]; complement-dependent cytotoxicity [GO:0097278]; complement-mediated synapse pruning [GO:0150062]…	cell surface [GO:0009986]; extracellular region [GO:0005576]; extracellular space [GO:0005615]; protein-containing complex [GO:0032991]	cell surface [GO:0009986]; extracellular region [GO:0005576]; extracellular space [GO:0005615]; protein-containing complex [GO:0032991]; C5L2 anaphylatoxin chemotactic receptor binding [GO:0031715]; cofactor binding [GO:0048037]; endopeptidase inhibitor activity [GO:0004866]; lipid binding [GO:0008289]; amyloid-beta clearance [GO:0097242]; blood coagulation [GO:0007596]; cell surface receptor sig…	C5L2 anaphylatoxin chemotactic receptor binding [GO:0031715]; cofactor binding [GO:0048037]; endopeptidase inhibitor activity [GO:0004866]; lipid binding [GO:0008289]	GO:0001798; GO:0001934; GO:0001970; GO:0004866; GO:0005576; GO:0005615; GO:0006631; GO:0006954; GO:0006956; GO:0006957; GO:0006958; GO:0007596; GO:0008289; GO:0009617; GO:0009986; GO:0010575; GO:0010828; GO:0010866; GO:0010884; GO:0016322; GO:0031715; GO:0032991; GO:0045745; GO:0045766; GO:0048037; GO:0048260; GO:0048639; GO:0050766; GO:0060100; GO:0070374; GO:0097242; GO:0097278; GO:0150062; GO:…	RecName: Full=Complement C3; AltName: Full=HSE-MSF; Contains: RecName: Full=Complement C3 beta chain; Contains: RecName: Full=C3-beta-c; Short=C3bc; Contains: RecName: Full=Complement C3 alpha chain; Contains: RecName: Full=C3a anaphylatoxin; Contains: RecName: Full=Acylation stimulating protein; Short=ASP; AltName: Full=C3adesArg; Contains: RecName: Full=Complement C3b alpha' chain; Contains: Re…	30.97	1	42	42	379.797	1.68026e+08	2.06878e+09	1.80927e+08	1.32389e+08	54	34	51	48	56	35	53	49	1663	186.366	6.72705
Q922D8	C1TC	C-1-tetrahydrofolate synthase, cytoplasmic		SUBCELLULAR LOCATION: Cytoplasm {ECO:0000250}.	10-formyltetrahydrofolate biosynthetic process [GO:0009257]; heart development [GO:0007507]; histidine biosynthetic process [GO:0000105]; methionine biosynthetic process [GO:0009086]; methionine metabolic process [GO:0006555]; neural tube closure [GO:0001843]; neutrophil homeostasis [GO:0001780]; one-carbon metabolic process [GO:0006730]; purine nucleobase biosynthetic process [GO:0009113]; purin…	cytoplasm [GO:0005737]; cytosol [GO:0005829]; mitochondrion [GO:0005739]	cytoplasm [GO:0005737]; cytosol [GO:0005829]; mitochondrion [GO:0005739]; ATP binding [GO:0005524]; formate-tetrahydrofolate ligase activity [GO:0004329]; methenyltetrahydrofolate cyclohydrolase activity [GO:0004477]; methylenetetrahydrofolate dehydrogenase (NAD+) activity [GO:0004487]; methylenetetrahydrofolate dehydrogenase (NADP+) activity [GO:0004488]; methylenetetrahydrofolate dehydrogenase …	ATP binding [GO:0005524]; formate-tetrahydrofolate ligase activity [GO:0004329]; methenyltetrahydrofolate cyclohydrolase activity [GO:0004477]; methylenetetrahydrofolate dehydrogenase (NAD+) activity [GO:0004487]; methylenetetrahydrofolate dehydrogenase (NADP+) activity [GO:0004488]; methylenetetrahydrofolate dehydrogenase [NAD(P)+] activity [GO:0004486]	GO:0000105; GO:0001780; GO:0001843; GO:0004329; GO:0004477; GO:0004486; GO:0004487; GO:0004488; GO:0005524; GO:0005737; GO:0005739; GO:0005829; GO:0006164; GO:0006555; GO:0006730; GO:0007507; GO:0009069; GO:0009070; GO:0009086; GO:0009113; GO:0009257; GO:0019346; GO:0035999; GO:0061053	RecName: Full=C-1-tetrahydrofolate synthase, cytoplasmic; Short=C1-THF synthase; Includes: RecName: Full=Methylenetetrahydrofolate dehydrogenase; Includes: RecName: Full=Methenyltetrahydrofolate cyclohydrolase; Includes: RecName: Full=Formyltetrahydrofolate synthetase; Contains: RecName: Full=C-1-tetrahydrofolate synthase, cytoplasmic, N-terminally processed - [C1TC_MOUSE]	42.03	1	32	32	377.766	4.534e+08	2.56176e+08	2.97684e+08	2.51392e+08	51	47	40	48	53	48	41	49	935	101.136	7.13721
Q99J08	S14L2	SEC14-like protein 2	FUNCTION: Carrier protein. Binds to some hydrophobic molecules and promotes their transfer between the different cellular sites. Binds with high affinity to alpha-tocopherol. Also binds with a weaker affinity to other tocopherols and to tocotrienols. May have a transcriptional activatory activity via its association with alpha-tocopherol. Probably recognizes and binds some squalene structure, sug…	SUBCELLULAR LOCATION: Cytoplasm {ECO:0000250}. Nucleus {ECO:0000250}. Note=Cytoplasmic in absence of alpha-tocopherol, and nuclear in presence of alpha-tocopherol. {ECO:0000250}.	positive regulation of cholesterol biosynthetic process [GO:0045542]	cytosol [GO:0005829]; nucleoplasm [GO:0005654]	cytosol [GO:0005829]; nucleoplasm [GO:0005654]; enzyme activator activity [GO:0008047]; lipid binding [GO:0008289]; transferase activity, transferring alkyl or aryl (other than methyl) groups [GO:0016765]; positive regulation of cholesterol biosynthetic process [GO:0045542]	enzyme activator activity [GO:0008047]; lipid binding [GO:0008289]; transferase activity, transferring alkyl or aryl (other than methyl) groups [GO:0016765]	GO:0005654; GO:0005829; GO:0008047; GO:0008289; GO:0016765; GO:0045542	RecName: Full=SEC14-like protein 2; AltName: Full=Alpha-tocopherol-associated protein; Short=TAP - [S14L2_MOUSE]	57.57	2	18	19	373.704	5.37642e+08	3.4453e+08	4.46056e+08	472311740	60	40	36	48	62	41	37	49	403	46.2706	7.10791
P06801	MAOX	NADP-dependent malic enzyme		SUBCELLULAR LOCATION: Cytoplasm.	malate metabolic process [GO:0006108]; pyruvate metabolic process [GO:0006090]; regulation of NADP metabolic process [GO:1902031]; response to hormone [GO:0009725]	cytosol [GO:0005829]; mitochondrion [GO:0005739]	cytosol [GO:0005829]; mitochondrion [GO:0005739]; malate dehydrogenase (decarboxylating) (NAD+) activity [GO:0004471]; malate dehydrogenase (decarboxylating) (NADP+) activity [GO:0004473]; malic enzyme activity [GO:0004470]; manganese ion binding [GO:0030145]; NAD binding [GO:0051287]; NADP binding [GO:0050661]; oxaloacetate decarboxylase activity [GO:0008948]; malate metabolic process [GO:000610…	malate dehydrogenase (decarboxylating) (NAD+) activity [GO:0004471]; malate dehydrogenase (decarboxylating) (NADP+) activity [GO:0004473]; malic enzyme activity [GO:0004470]; manganese ion binding [GO:0030145]; NAD binding [GO:0051287]; NADP binding [GO:0050661]; oxaloacetate decarboxylase activity [GO:0008948]	GO:0004470; GO:0004471; GO:0004473; GO:0005739; GO:0005829; GO:0006090; GO:0006108; GO:0008948; GO:0009725; GO:0030145; GO:0050661; GO:0051287; GO:1902031	RecName: Full=NADP-dependent malic enzyme; Short=NADP-ME; AltName: Full=Malic enzyme 1 - [MAOX_MOUSE]	63.46	1	25	25	322.929	3.20188e+08	6.7366e+07	2.30939e+08	1.9844e+08	59	19	33	48	61	20	34	49	572	63.9131	7.44482
O08601	MTP	Microsomal triglyceride transfer protein large subunit	FUNCTION: Catalyzes the transport of triglyceride, cholesteryl ester, and phospholipid between phospholipid surfaces. Required for the secretion of plasma lipoproteins that contain apolipoprotein B. May be involved in regulating cholesteryl ester biosynthesis in cells that produce lipoproteins. Loads phospholipid into the C1D1 antigen-binding groove. Isoform 2 is critical for the development of n…	SUBCELLULAR LOCATION: [Isoform 1]: Endoplasmic reticulum. Note=Localized to the endoplasmic reticulum (PubMed:17312007). Colocalizes with P4HB/PDI in the endoplasmic reticulum (By similarity). {ECO:0000250|UniProtKB:P55157, ECO:0000269|PubMed:17312007}.; SUBCELLULAR LOCATION: [Isoform 2]: Endoplasmic reticulum. Golgi apparatus. Note=Localized to the endoplasmic reticulum (PubMed:17312007). Locali…	cholesterol homeostasis [GO:0042632]; cholesterol metabolic process [GO:0008203]; circadian rhythm [GO:0007623]; lipid metabolic process [GO:0006629]; lipid transport [GO:0006869]; lipoprotein metabolic process [GO:0042157]; lipoprotein transport [GO:0042953]; phospholipid transport [GO:0015914]; plasma lipoprotein particle assembly [GO:0034377]; protein lipidation [GO:0006497]; protein secretion…	basolateral plasma membrane [GO:0016323]; brush border membrane [GO:0031526]; endoplasmic reticulum [GO:0005783]; Golgi apparatus [GO:0005794]; microvillus membrane [GO:0031528]; receptor complex [GO:0043235]; rough endoplasmic reticulum [GO:0005791]; vesicle [GO:0031982]	basolateral plasma membrane [GO:0016323]; brush border membrane [GO:0031526]; endoplasmic reticulum [GO:0005783]; Golgi apparatus [GO:0005794]; microvillus membrane [GO:0031528]; receptor complex [GO:0043235]; rough endoplasmic reticulum [GO:0005791]; vesicle [GO:0031982]; apolipoprotein binding [GO:0034185]; ceramide 1-phosphate transfer activity [GO:1902388]; lipid binding [GO:0008289]; lipid t…	apolipoprotein binding [GO:0034185]; ceramide 1-phosphate transfer activity [GO:1902388]; lipid binding [GO:0008289]; lipid transporter activity [GO:0005319]; phospholipid transfer activity [GO:0120014]; phospholipid transporter activity [GO:0005548]; protein-containing complex binding [GO:0044877]; protein heterodimerization activity [GO:0046982]; triglyceride transfer activity [GO:0140344]	GO:0005319; GO:0005548; GO:0005783; GO:0005791; GO:0005794; GO:0006497; GO:0006629; GO:0006641; GO:0006869; GO:0007623; GO:0008203; GO:0008289; GO:0009306; GO:0015914; GO:0016323; GO:0031526; GO:0031528; GO:0031982; GO:0034185; GO:0034197; GO:0034377; GO:0042157; GO:0042632; GO:0042953; GO:0043235; GO:0044877; GO:0046982; GO:0051592; GO:0120014; GO:0140344; GO:1902388	RecName: Full=Microsomal triglyceride transfer protein large subunit; Flags: Precursor - [MTP_MOUSE]	37.58	1	27	27	333.084	3.01842e+08	1.5055e+08	2.84522e+08	2.63119e+08	41	31	45	47	42	32	46	48	894	99.0366	7.62061
O08709	PRDX6	Peroxiredoxin-6	FUNCTION: Thiol-specific peroxidase that catalyzes the reduction of hydrogen peroxide and organic hydroperoxides to water and alcohols, respectively. Can reduce H(2)O(2) and short chain organic, fatty acid, and phospholipid hydroperoxides. Also has phospholipase activity, and can therefore either reduce the oxidized sn-2 fatty acyl grup of phospholipids (peroxidase activity) or hydrolyze the sn-2…	SUBCELLULAR LOCATION: Cytoplasm {ECO:0000250|UniProtKB:O35244}. Lysosome {ECO:0000250|UniProtKB:O35244}. Note=Also found in lung secretory organelles (lamellar bodies). {ECO:0000250|UniProtKB:O35244}.	bleb assembly [GO:0032060]; cell redox homeostasis [GO:0045454]; cellular oxidant detoxification [GO:0098869]; glycerophospholipid catabolic process [GO:0046475]; hydrogen peroxide catabolic process [GO:0042744]; positive regulation of mRNA splicing, via spliceosome [GO:0048026]; response to oxidative stress [GO:0006979]; response to reactive oxygen species [GO:0000302]	cell [GO:0005623]; cytoplasm [GO:0005737]; cytosol [GO:0005829]; lysosome [GO:0005764]; mitochondrion [GO:0005739]; nucleus [GO:0005634]; perinuclear region of cytoplasm [GO:0048471]	cell [GO:0005623]; cytoplasm [GO:0005737]; cytosol [GO:0005829]; lysosome [GO:0005764]; mitochondrion [GO:0005739]; nucleus [GO:0005634]; perinuclear region of cytoplasm [GO:0048471]; calcium-independent phospholipase A2 activity [GO:0047499]; glutathione peroxidase activity [GO:0004602]; identical protein binding [GO:0042802]; peroxidase activity [GO:0004601]; peroxiredoxin activity [GO:0051920]…	calcium-independent phospholipase A2 activity [GO:0047499]; glutathione peroxidase activity [GO:0004602]; identical protein binding [GO:0042802]; peroxidase activity [GO:0004601]; peroxiredoxin activity [GO:0051920]; phospholipase A2 activity (consuming 1,2-dipalmitoylphosphatidylcholine) [GO:0102567]; phospholipase A2 activity consuming 1,2-dioleoylphosphatidylethanolamine) [GO:0102568]; ubiquit…	GO:0000302; GO:0004601; GO:0004602; GO:0005623; GO:0005634; GO:0005737; GO:0005739; GO:0005764; GO:0005829; GO:0006979; GO:0031625; GO:0032060; GO:0042744; GO:0042802; GO:0045454; GO:0046475; GO:0047499; GO:0048026; GO:0048471; GO:0051920; GO:0098869; GO:0102567; GO:0102568	RecName: Full=Peroxiredoxin-6; AltName: Full=1-Cys peroxiredoxin; Short=1-Cys PRX; AltName: Full=Acidic calcium-independent phospholipase A2; Short=aiPLA2; AltName: Full=Antioxidant protein 2; AltName: Full=Glutathione-dependent peroxiredoxin; AltName: Full=Non-selenium glutathione peroxidase; Short=NSGPx - [PRDX6_MOUSE]	54.91	1	15	15	398.076	1.90319e+09	1033773431	1.26689e+09	1.15646e+09	57	51	42	46	59	53	43	47	224	24.855	6.01123
Q05421	CP2E1	Cytochrome P450 2E1	FUNCTION: A cytochrome P450 monooxygenase involved in the metabolism of fatty acids. Mechanistically, uses molecular oxygen inserting one oxygen atom into a substrate, and reducing the second into a water molecule, with two electrons provided by NADPH via cytochrome P450 reductase (NADPH--hemoprotein reductase). Catalyzes the hydroxylation of carbon-hydrogen bonds. Hydroxylates fatty acids specif…	SUBCELLULAR LOCATION: Endoplasmic reticulum membrane {ECO:0000250|UniProtKB:P05182}; Peripheral membrane protein {ECO:0000250|UniProtKB:P05182}. Microsome membrane {ECO:0000250|UniProtKB:P05182}; Peripheral membrane protein {ECO:0000250|UniProtKB:P05182}. Mitochondrion inner membrane {ECO:0000250|UniProtKB:P05182}; Peripheral membrane protein {ECO:0000250|UniProtKB:P05182}. Note=Post-translationa…	4-nitrophenol metabolic process [GO:0018960]; drug metabolic process [GO:0017144]; epoxygenase P450 pathway [GO:0019373]; exogenous drug catabolic process [GO:0042738]; heterocycle metabolic process [GO:0046483]; lipid hydroxylation [GO:0002933]; monoterpenoid metabolic process [GO:0016098]; organic acid metabolic process [GO:0006082]; oxidation-reduction process [GO:0055114]; response to bacteri…	cytoplasm [GO:0005737]; endoplasmic reticulum [GO:0005783]; endoplasmic reticulum membrane [GO:0005789]; Golgi membrane [GO:0000139]; intracellular membrane-bounded organelle [GO:0043231]; intrinsic component of endoplasmic reticulum membrane [GO:0031227]; mitochondrial inner membrane [GO:0005743]; mitochondrion [GO:0005739]	cytoplasm [GO:0005737]; endoplasmic reticulum [GO:0005783]; endoplasmic reticulum membrane [GO:0005789]; Golgi membrane [GO:0000139]; intracellular membrane-bounded organelle [GO:0043231]; intrinsic component of endoplasmic reticulum membrane [GO:0031227]; mitochondrial inner membrane [GO:0005743]; mitochondrion [GO:0005739]; 4-nitrophenol 2-monooxygenase activity [GO:0018601]; arachidonic acid e…	4-nitrophenol 2-monooxygenase activity [GO:0018601]; arachidonic acid epoxygenase activity [GO:0008392]; aromatase activity [GO:0070330]; enzyme binding [GO:0019899]; heme binding [GO:0020037]; Hsp70 protein binding [GO:0030544]; Hsp90 protein binding [GO:0051879]; iron ion binding [GO:0005506]; monooxygenase activity [GO:0004497]; oxidoreductase activity [GO:0016491]; oxidoreductase activity, ac…	GO:0000139; GO:0002933; GO:0004497; GO:0005506; GO:0005737; GO:0005739; GO:0005743; GO:0005783; GO:0005789; GO:0006082; GO:0006641; GO:0006805; GO:0008202; GO:0008392; GO:0008395; GO:0009617; GO:0010193; GO:0010243; GO:0016098; GO:0016491; GO:0016712; GO:0017144; GO:0018601; GO:0018960; GO:0019373; GO:0019899; GO:0020037; GO:0030544; GO:0031227; GO:0042738; GO:0043231; GO:0045471; GO:0046483; GO:…	RecName: Full=Cytochrome P450 2E1; AltName: Full=4-nitrophenol 2-hydroxylase; AltName: Full=CYPIIE1; AltName: Full=Cytochrome P450-ALC; AltName: Full=Cytochrome P450-J - [CP2E1_MOUSE]	35.9	2	20	20	294.495	6.77079e+08	4.86956e+08	1.01277e+08	4.42215e+08	43	40	16	46	44	41	16	47	493	56.7686	8.39697
Q99K67	AASS	Alpha-aminoadipic semialdehyde synthase, mitochondrial	FUNCTION: Bifunctional enzyme that catalyzes the first two steps in lysine degradation. The N-terminal and the C-terminal contain lysine-oxoglutarate reductase and saccharopine dehydrogenase activity, respectively.	SUBCELLULAR LOCATION: Mitochondrion.	generation of precursor metabolites and energy [GO:0006091]; L-lysine catabolic process [GO:0019477]; L-lysine catabolic process to acetyl-CoA via saccharopine [GO:0033512]	cytoplasm [GO:0005737]; intracellular membrane-bounded organelle [GO:0043231]; mitochondrion [GO:0005739]	cytoplasm [GO:0005737]; intracellular membrane-bounded organelle [GO:0043231]; mitochondrion [GO:0005739]; saccharopine dehydrogenase (NAD+, L-glutamate-forming) activity [GO:0047131]; saccharopine dehydrogenase (NADP+, L-lysine-forming) activity [GO:0047130]; generation of precursor metabolites and energy [GO:0006091]; L-lysine catabolic process [GO:0019477]; L-lysine catabolic process to acetyl…	saccharopine dehydrogenase (NAD+, L-glutamate-forming) activity [GO:0047131]; saccharopine dehydrogenase (NADP+, L-lysine-forming) activity [GO:0047130]	GO:0005737; GO:0005739; GO:0006091; GO:0019477; GO:0033512; GO:0043231; GO:0047130; GO:0047131	RecName: Full=Alpha-aminoadipic semialdehyde synthase, mitochondrial; AltName: Full=LKR/SDH; Includes: RecName: Full=Lysine ketoglutarate reductase; Short=LKR; Short=LOR; Includes: RecName: Full=Saccharopine dehydrogenase; Short=SDH; Flags: Precursor - [AASS_MOUSE]	35.1	1	27	27	341.208	7.16951e+08	2.25644e+08	208339134	3.19546e+08	47	35	41	45	48	36	42	46	926	102.909	6.87354
P15626	GSTM2	Glutathione S-transferase Mu 2	FUNCTION: Conjugation of reduced glutathione to a wide number of exogenous and endogenous hydrophobic electrophiles. Participates in the formation of novel hepoxilin regioisomers. {ECO:0000250|UniProtKB:P28161}.	SUBCELLULAR LOCATION: Cytoplasm.	cellular detoxification of nitrogen compound [GO:0070458]; glutathione metabolic process [GO:0006749]; nitrobenzene metabolic process [GO:0018916]; xenobiotic catabolic process [GO:0042178]	cytoplasm [GO:0005737]; cytosol [GO:0005829]; intercellular bridge [GO:0045171]; plasma membrane [GO:0005886]; protein-containing complex [GO:0032991]	cytoplasm [GO:0005737]; cytosol [GO:0005829]; intercellular bridge [GO:0045171]; plasma membrane [GO:0005886]; protein-containing complex [GO:0032991]; enzyme binding [GO:0019899]; glutathione binding [GO:0043295]; glutathione transferase activity [GO:0004364]; identical protein binding [GO:0042802]; protein homodimerization activity [GO:0042803]; cellular detoxification of nitrogen compound [GO:…	enzyme binding [GO:0019899]; glutathione binding [GO:0043295]; glutathione transferase activity [GO:0004364]; identical protein binding [GO:0042802]; protein homodimerization activity [GO:0042803]	GO:0004364; GO:0005737; GO:0005829; GO:0005886; GO:0006749; GO:0018916; GO:0019899; GO:0032991; GO:0042178; GO:0042802; GO:0042803; GO:0043295; GO:0045171; GO:0070458	RecName: Full=Glutathione S-transferase Mu 2; AltName: Full=GST 5-5; AltName: Full=GST class-mu 2; AltName: Full=Glutathione S-transferase pmGT2 - [GSTM2_MOUSE]	55.96	1	7	13	284.34	6.86358e+09	2.97496e+09	7.85667e+09	6.62267e+09	30	26	39	45	31	27	40	46	218	25.7	7.38623
Q9DCW4	ETFB	Electron transfer flavoprotein subunit beta	FUNCTION: Heterodimeric electron transfer flavoprotein that accepts electrons from several mitochondrial dehydrogenases, including acyl-CoA dehydrogenases, glutaryl-CoA and sarcosine dehydrogenase. It transfers the electrons to the main mitochondrial respiratory chain via ETF-ubiquinone oxidoreductase (By similarity). Required for normal mitochondrial fatty acid oxidation and normal amino acid me…	SUBCELLULAR LOCATION: Mitochondrion matrix {ECO:0000250|UniProtKB:P38117}.	fatty acid beta-oxidation using acyl-CoA dehydrogenase [GO:0033539]	mitochondrial electron transfer flavoprotein complex [GO:0017133]; mitochondrial matrix [GO:0005759]; mitochondrion [GO:0005739]	mitochondrial electron transfer flavoprotein complex [GO:0017133]; mitochondrial matrix [GO:0005759]; mitochondrion [GO:0005739]; electron transfer activity [GO:0009055]; nucleotide binding [GO:0000166]; fatty acid beta-oxidation using acyl-CoA dehydrogenase [GO:0033539]	electron transfer activity [GO:0009055]; nucleotide binding [GO:0000166]	GO:0000166; GO:0005739; GO:0005759; GO:0009055; GO:0017133; GO:0033539	RecName: Full=Electron transfer flavoprotein subunit beta; Short=Beta-ETF - [ETFB_MOUSE]	67.06	1	15	15	359.487	1.77095e+09	9.28708e+08	1.29784e+09	956573391	50	44	38	45	52	45	39	46	255	27.606	8.104
Q8QZR5	ALAT1	Alanine aminotransferase 1	FUNCTION: Catalyzes the reversible transamination between alanine and 2-oxoglutarate to form pyruvate and glutamate. Participates in cellular nitrogen metabolism and also in liver gluconeogenesis starting with precursors transported from skeletal muscles (By similarity). {ECO:0000250}.	SUBCELLULAR LOCATION: Cytoplasm {ECO:0000250}.	biosynthetic process [GO:0009058]; cellular response to insulin stimulus [GO:0032869]; L-alanine catabolic process [GO:0042853]; positive regulation of gluconeogenesis [GO:0045722]; response to starvation [GO:0042594]	cytoplasm [GO:0005737]; extracellular space [GO:0005615]	cytoplasm [GO:0005737]; extracellular space [GO:0005615]; L-alanine:2-oxoglutarate aminotransferase activity [GO:0004021]; pyridoxal phosphate binding [GO:0030170]; biosynthetic process [GO:0009058]; cellular response to insulin stimulus [GO:0032869]; L-alanine catabolic process [GO:0042853]; positive regulation of gluconeogenesis [GO:0045722]; response to starvation [GO:0042594]	L-alanine:2-oxoglutarate aminotransferase activity [GO:0004021]; pyridoxal phosphate binding [GO:0030170]	GO:0004021; GO:0005615; GO:0005737; GO:0009058; GO:0030170; GO:0032869; GO:0042594; GO:0042853; GO:0045722	RecName: Full=Alanine aminotransferase 1; Short=ALT1; AltName: Full=Glutamate pyruvate transaminase 1; Short=GPT 1; AltName: Full=Glutamic--alanine transaminase 1; AltName: Full=Glutamic--pyruvic transaminase 1 - [ALAT1_MOUSE]	56.25	1	19	20	320.898	5.08944e+08	2.96249e+08	4.54857e+08	3.12107e+08	45	33	35	45	46	34	36	46	496	55.107	6.63916
Q9CZ13	QCR1	Cytochrome b-c1 complex subunit 1, mitochondrial	FUNCTION: Component of the ubiquinol-cytochrome c oxidoreductase, a multisubunit transmembrane complex that is part of the mitochondrial electron transport chain which drives oxidative phosphorylation. The respiratory chain contains 3 multisubunit complexes succinate dehydrogenase (complex II, CII), ubiquinol-cytochrome c oxidoreductase (cytochrome b-c1 complex, complex III, CIII) and cytochrome …	SUBCELLULAR LOCATION: Mitochondrion inner membrane {ECO:0000250|UniProtKB:P07256}; Peripheral membrane protein {ECO:0000250|UniProtKB:P07256}; Matrix side {ECO:0000250|UniProtKB:P07256}.	mitochondrial electron transport, ubiquinol to cytochrome c [GO:0006122]; response to activity [GO:0014823]; response to alkaloid [GO:0043279]	cytosol [GO:0005829]; mitochondrial inner membrane [GO:0005743]; mitochondrial respiratory chain complex III [GO:0005750]; mitochondrion [GO:0005739]; myelin sheath [GO:0043209]	cytosol [GO:0005829]; mitochondrial inner membrane [GO:0005743]; mitochondrial respiratory chain complex III [GO:0005750]; mitochondrion [GO:0005739]; myelin sheath [GO:0043209]; catalytic activity [GO:0003824]; metal ion binding [GO:0046872]; protein-containing complex binding [GO:0044877]; ubiquitin protein ligase binding [GO:0031625]; mitochondrial electron transport, ubiquinol to cytochrome c…	catalytic activity [GO:0003824]; metal ion binding [GO:0046872]; protein-containing complex binding [GO:0044877]; ubiquitin protein ligase binding [GO:0031625]	GO:0003824; GO:0005739; GO:0005743; GO:0005750; GO:0005829; GO:0006122; GO:0014823; GO:0031625; GO:0043209; GO:0043279; GO:0044877; GO:0046872	RecName: Full=Cytochrome b-c1 complex subunit 1, mitochondrial; AltName: Full=Complex III subunit 1; AltName: Full=Core protein I; AltName: Full=Ubiquinol-cytochrome-c reductase complex core protein 1; Flags: Precursor - [QCR1_MOUSE]	55	1	18	19	326.991	7.02568e+08	4.77771e+08	5.3269e+08	5.08303e+08	43	40	33	45	44	41	34	46	480	52.8185	6.21436
Q9QXD1	ACOX2	Peroxisomal acyl-coenzyme A oxidase 2	FUNCTION: Oxidizes the CoA esters of the bile acid intermediates di- and tri-hydroxycoprostanic acids (By similarity). Capable of oxidizing short as well as long chain 2-methyl branched fatty acids (By similarity). {ECO:0000250|UniProtKB:P97562}.	SUBCELLULAR LOCATION: Peroxisome {ECO:0000250|UniProtKB:Q99424}.	fatty acid beta-oxidation [GO:0006635]; fatty acid beta-oxidation using acyl-CoA oxidase [GO:0033540]; lipid homeostasis [GO:0055088]; positive regulation of cell death [GO:0010942]; positive regulation of response to oxidative stress [GO:1902884]	cytosol [GO:0005829]; intracellular membrane-bounded organelle [GO:0043231]; peroxisome [GO:0005777]	cytosol [GO:0005829]; intracellular membrane-bounded organelle [GO:0043231]; peroxisome [GO:0005777]; 3alpha,7alpha,12alpha-trihydroxy-5beta-cholestanoyl-CoA 24-hydroxylase activity [GO:0033791]; acyl-CoA oxidase activity [GO:0003997]; FAD binding [GO:0071949]; fatty acid binding [GO:0005504]; flavin adenine dinucleotide binding [GO:0050660]; protein homodimerization activity [GO:0042803]; fatty …	3alpha,7alpha,12alpha-trihydroxy-5beta-cholestanoyl-CoA 24-hydroxylase activity [GO:0033791]; acyl-CoA oxidase activity [GO:0003997]; FAD binding [GO:0071949]; fatty acid binding [GO:0005504]; flavin adenine dinucleotide binding [GO:0050660]; protein homodimerization activity [GO:0042803]	GO:0003997; GO:0005504; GO:0005777; GO:0005829; GO:0006635; GO:0010942; GO:0033540; GO:0033791; GO:0042803; GO:0043231; GO:0050660; GO:0055088; GO:0071949; GO:1902884	RecName: Full=Peroxisomal acyl-coenzyme A oxidase 2; AltName: Full=3-alpha,7-alpha,12-alpha-trihydroxy-5-beta-cholestanoyl-CoA 24-hydroxylase; AltName: Full=3-alpha,7-alpha,12-alpha-trihydroxy-5-beta-cholestanoyl-CoA oxidase; AltName: Full=Trihydroxycoprostanoyl-CoA oxidase; Short=THCA-CoA oxidase; Short=THCCox - [ACOX2_MOUSE]	42	1	26	26	280.278	2.31959e+08	1.67832e+08	247283631	1.48299e+08	32	30	31	45	33	31	32	46	681	76.814	7.45947
Q99LC5	ETFA	Electron transfer flavoprotein subunit alpha, mitochondrial	FUNCTION: Heterodimeric electron transfer flavoprotein that accepts electrons from several mitochondrial dehydrogenases, including acyl-CoA dehydrogenases, glutaryl-CoA and sarcosine dehydrogenase. It transfers the electrons to the main mitochondrial respiratory chain via ETF-ubiquinone oxidoreductase (ETF dehydrogenase). Required for normal mitochondrial fatty acid oxidation and normal amino aci…	SUBCELLULAR LOCATION: Mitochondrion matrix {ECO:0000250|UniProtKB:P13804}.	fatty acid beta-oxidation using acyl-CoA dehydrogenase [GO:0033539]	mitochondrial electron transfer flavoprotein complex [GO:0017133]; mitochondrion [GO:0005739]	mitochondrial electron transfer flavoprotein complex [GO:0017133]; mitochondrion [GO:0005739]; electron transfer activity [GO:0009055]; flavin adenine dinucleotide binding [GO:0050660]; oxidoreductase activity [GO:0016491]; fatty acid beta-oxidation using acyl-CoA dehydrogenase [GO:0033539]	electron transfer activity [GO:0009055]; flavin adenine dinucleotide binding [GO:0050660]; oxidoreductase activity [GO:0016491]	GO:0005739; GO:0009055; GO:0016491; GO:0017133; GO:0033539; GO:0050660	RecName: Full=Electron transfer flavoprotein subunit alpha, mitochondrial; Short=Alpha-ETF; Flags: Precursor - [ETFA_MOUSE]	58.26	1	14	14	365.58	1.74967e+09	7.42949e+08	1.04663e+09	8.6035e+08	50	42	44	44	52	43	45	45	333	34.9875	8.38232
P13745	GSTA1	Glutathione S-transferase A1	FUNCTION: Glutathione S-transferase that catalyzes the nucleophilic attack of the sulfur atom of glutathione on the electrophilic groups of a wide range of exogenous and endogenous compounds (Probable). Involved in the formation of glutathione conjugates of both prostaglandin A2 (PGA2) and prostaglandin J2 (PGJ2). It also catalyzes the isomerization of D5-androstene-3,17-dione (AD) into D4-andros…		glutathione derivative biosynthetic process [GO:1901687]; glutathione metabolic process [GO:0006749]; prostaglandin metabolic process [GO:0006693]; response to bacterium [GO:0009617]; response to stilbenoid [GO:0035634]; xenobiotic metabolic process [GO:0006805]	cytosol [GO:0005829]	cytosol [GO:0005829]; glutathione binding [GO:0043295]; glutathione transferase activity [GO:0004364]; peroxidase activity [GO:0004601]; steroid delta-isomerase activity [GO:0004769]; glutathione derivative biosynthetic process [GO:1901687]; glutathione metabolic process [GO:0006749]; prostaglandin metabolic process [GO:0006693]; response to bacterium [GO:0009617]; response to stilbenoid [GO:0035…	glutathione binding [GO:0043295]; glutathione transferase activity [GO:0004364]; peroxidase activity [GO:0004601]; steroid delta-isomerase activity [GO:0004769]	GO:0004364; GO:0004601; GO:0004769; GO:0005829; GO:0006693; GO:0006749; GO:0006805; GO:0009617; GO:0035634; GO:0043295; GO:1901687	RecName: Full=Glutathione S-transferase A1; AltName: Full=13-hydroperoxyoctadecadienoate peroxidase; AltName: Full=Androst-5-ene-3,17-dione isomerase; AltName: Full=GST class-alpha member 1; AltName: Full=Glutathione S-transferase Ya; AltName: Full=Glutathione S-transferase Ya1; Contains: RecName: Full=Glutathione S-transferase A1, N-terminally processed - [GSTA1_MOUSE]	41.26	2	8	11	391.983	1.95745e+09	1.46205e+09	1.97909e+09	1.8713e+09	71	37	41	44	73	38	42	45	223	25.5915	8.98291
P17751	TPIS	Triosephosphate isomerase	FUNCTION: Triosephosphate isomerase is an extremely efficient metabolic enzyme that catalyzes the interconversion between dihydroxyacetone phosphate (DHAP) and D-glyceraldehyde-3-phosphate (G3P) in glycolysis and gluconeogenesis. {ECO:0000250|UniProtKB:P00939}.; FUNCTION: It is also responsible for the non-negligible production of methylglyoxal a reactive cytotoxic side-product that modifies and …	SUBCELLULAR LOCATION: Cytoplasm {ECO:0000255|PROSITE-ProRule:PRU10127}.	gluconeogenesis [GO:0006094]; glucose metabolic process [GO:0006006]; glyceraldehyde-3-phosphate biosynthetic process [GO:0046166]; glyceraldehyde-3-phosphate metabolic process [GO:0019682]; glycerol catabolic process [GO:0019563]; glycolytic process [GO:0006096]; methylglyoxal biosynthetic process [GO:0019242]; multicellular organism development [GO:0007275]	cytosol [GO:0005829]	cytosol [GO:0005829]; isomerase activity [GO:0016853]; methylglyoxal synthase activity [GO:0008929]; protein homodimerization activity [GO:0042803]; triose-phosphate isomerase activity [GO:0004807]; ubiquitin protein ligase binding [GO:0031625]; gluconeogenesis [GO:0006094]; glucose metabolic process [GO:0006006]; glyceraldehyde-3-phosphate biosynthetic process [GO:0046166]; glyceraldehyde-3-phos…	isomerase activity [GO:0016853]; methylglyoxal synthase activity [GO:0008929]; protein homodimerization activity [GO:0042803]; triose-phosphate isomerase activity [GO:0004807]; ubiquitin protein ligase binding [GO:0031625]	GO:0004807; GO:0005829; GO:0006006; GO:0006094; GO:0006096; GO:0007275; GO:0008929; GO:0016853; GO:0019242; GO:0019563; GO:0019682; GO:0031625; GO:0042803; GO:0046166	RecName: Full=Triosephosphate isomerase; Short=TIM; AltName: Full=Methylglyoxal synthase; AltName: Full=Triose-phosphate isomerase - [TPIS_MOUSE]	68.56	1	13	13	337.146	1.44373e+09	6.86892e+08	1.1622e+09	9.61529e+08	46	35	41	44	47	36	42	45	299	32.1713	5.74463
Q8CHT0	AL4A1	Delta-1-pyrroline-5-carboxylate dehydrogenase, mitochondrial	FUNCTION: Irreversible conversion of delta-1-pyrroline-5-carboxylate (P5C), derived either from proline or ornithine, to glutamate. This is a necessary step in the pathway interconnecting the urea and tricarboxylic acid cycles. The preferred substrate is glutamic gamma-semialdehyde, other substrates include succinic, glutaric and adipic semialdehydes (By similarity). {ECO:0000250}.	SUBCELLULAR LOCATION: Mitochondrion matrix {ECO:0000250}.	proline catabolic process to glutamate [GO:0010133]	mitochondrial matrix [GO:0005759]; mitochondrion [GO:0005739]	mitochondrial matrix [GO:0005759]; mitochondrion [GO:0005739]; 1-pyrroline-5-carboxylate dehydrogenase activity [GO:0003842]; aldehyde dehydrogenase (NAD+) activity [GO:0004029]; identical protein binding [GO:0042802]; proline catabolic process to glutamate [GO:0010133]	1-pyrroline-5-carboxylate dehydrogenase activity [GO:0003842]; aldehyde dehydrogenase (NAD+) activity [GO:0004029]; identical protein binding [GO:0042802]	GO:0003842; GO:0004029; GO:0005739; GO:0005759; GO:0010133; GO:0042802	RecName: Full=Delta-1-pyrroline-5-carboxylate dehydrogenase, mitochondrial; Short=P5C dehydrogenase; AltName: Full=Aldehyde dehydrogenase family 4 member A1; AltName: Full=L-glutamate gamma-semialdehyde dehydrogenase; Flags: Precursor - [AL4A1_MOUSE]	48.75	1	20	20	331.053	7.34985e+08	5.34595e+08	5.9506e+08	6.34553e+08	47	36	36	44	48	37	37	45	562	61.8015	8.23584
Q4LDG0	S27A5	Bile acyl-CoA synthetase	FUNCTION: Acyl-CoA synthetase that catalyzes the activation of bile acids via formation of bile acid CoA thioesters which is necessary for their subsequent conjugation with glycine or taurine (PubMed:16618417). Catalyzes the activation of the primary bile acid, cholic acid (PubMed:16618417). Both primary bile acid (chenodeoxycholic acid) and secondary bile acids (deoxycholic acid and lithocholic …	SUBCELLULAR LOCATION: Endoplasmic reticulum membrane {ECO:0000250|UniProtKB:Q9Y2P5}; Multi-pass membrane protein {ECO:0000255}. Microsome {ECO:0000250|UniProtKB:Q9ES38}. Cell membrane {ECO:0000269|PubMed:16618416}; Multi-pass membrane protein {ECO:0000255}.	bile acid biosynthetic process [GO:0006699]; bile acid metabolic process [GO:0008206]; fatty acid transport [GO:0015908]; ketone body biosynthetic process [GO:0046951]; long-chain fatty acid import across plasma membrane [GO:0015911]; long-chain fatty acid metabolic process [GO:0001676]; triglyceride mobilization [GO:0006642]; very long-chain fatty acid metabolic process [GO:0000038]	basal plasma membrane [GO:0009925]; endoplasmic reticulum [GO:0005783]; integral component of endoplasmic reticulum membrane [GO:0030176]; intracellular membrane-bounded organelle [GO:0043231]; protein-containing complex [GO:0032991]	basal plasma membrane [GO:0009925]; endoplasmic reticulum [GO:0005783]; integral component of endoplasmic reticulum membrane [GO:0030176]; intracellular membrane-bounded organelle [GO:0043231]; protein-containing complex [GO:0032991]; ATP binding [GO:0005524]; cholate-CoA ligase activity [GO:0047747]; fatty acid transmembrane transporter activity [GO:0015245]; long-chain fatty acid transporter ac…	ATP binding [GO:0005524]; cholate-CoA ligase activity [GO:0047747]; fatty acid transmembrane transporter activity [GO:0015245]; long-chain fatty acid-CoA ligase activity [GO:0004467]; long-chain fatty acid transporter activity [GO:0005324]; protein-containing complex binding [GO:0044877]; very long-chain fatty acid-CoA ligase activity [GO:0031957]	GO:0000038; GO:0001676; GO:0004467; GO:0005324; GO:0005524; GO:0005783; GO:0006642; GO:0006699; GO:0008206; GO:0009925; GO:0015245; GO:0015908; GO:0015911; GO:0030176; GO:0031957; GO:0032991; GO:0043231; GO:0044877; GO:0046951; GO:0047747	RecName: Full=Bile acyl-CoA synthetase; Short=BACS; AltName: Full=Bile acid-CoA ligase; Short=BA-CoA ligase; Short=BAL; AltName: Full=Cholate--CoA ligase; AltName: Full=Fatty acid transport protein 5; Short=FATP-5; AltName: Full=Solute carrier family 27 member 5; AltName: Full=Very long-chain acyl-CoA synthetase-related protein; Short=VLACS-related; Short=VLACSR - [S27A5_MOUSE]	43.98	2	24	24	320.898	3.91659e+08	2.43752e+08	2.92421e+08	2.04097e+08	45	36	33	44	46	37	34	45	689	76.154	8.38232
Q01768	NDKB	Nucleoside diphosphate kinase B	FUNCTION: Major role in the synthesis of nucleoside triphosphates other than ATP. The ATP gamma phosphate is transferred to the NDP beta phosphate via a ping-pong mechanism, using a phosphorylated active-site intermediate (By similarity). Negatively regulates Rho activity by interacting with AKAP13/LBC. Acts as a transcriptional activator of the MYC gene; binds DNA non-specifically. Binds to both…	SUBCELLULAR LOCATION: Cytoplasm {ECO:0000250|UniProtKB:P22392}. Nucleus {ECO:0000250|UniProtKB:P22392}. Cell projection, lamellipodium {ECO:0000250|UniProtKB:P22392}. Cell projection, ruffle {ECO:0000250|UniProtKB:P22392}. Note=Colocalizes with ITGB1 and ITGB1BP1 at the edge or peripheral ruffles and lamellipodia during the early stages of cell spreading on fibronectin or collagen but not on vitr…	adenylate cyclase-activating G protein-coupled receptor signaling pathway [GO:0007189]; cellular response to fatty acid [GO:0071398]; cellular response to glucose stimulus [GO:0071333]; cellular response to oxidative stress [GO:0034599]; CTP biosynthetic process [GO:0006241]; GTP biosynthetic process [GO:0006183]; integrin-mediated signaling pathway [GO:0007229]; negative regulation of apoptotic …	cell [GO:0005623]; cell periphery [GO:0071944]; cytoplasm [GO:0005737]; intermediate filament [GO:0005882]; lamellipodium [GO:0030027]; mitochondrial membrane [GO:0031966]; mitochondrion [GO:0005739]; myelin sheath [GO:0043209]; nucleus [GO:0005634]; perinuclear region of cytoplasm [GO:0048471]; ruffle [GO:0001726]	cell [GO:0005623]; cell periphery [GO:0071944]; cytoplasm [GO:0005737]; intermediate filament [GO:0005882]; lamellipodium [GO:0030027]; mitochondrial membrane [GO:0031966]; mitochondrion [GO:0005739]; myelin sheath [GO:0043209]; nucleus [GO:0005634]; perinuclear region of cytoplasm [GO:0048471]; ruffle [GO:0001726]; ATP binding [GO:0005524]; DNA binding [GO:0003677]; drug binding [GO:0008144]; en…	ATP binding [GO:0005524]; DNA binding [GO:0003677]; drug binding [GO:0008144]; enzyme binding [GO:0019899]; fatty acid binding [GO:0005504]; GDP binding [GO:0019003]; G-quadruplex DNA binding [GO:0051880]; identical protein binding [GO:0042802]; intermediate filament binding [GO:0019215]; metal ion binding [GO:0046872]; nucleoside diphosphate kinase activity [GO:0004550]; protein histidine kinase…	GO:0001726; GO:0002762; GO:0003677; GO:0003713; GO:0004550; GO:0004673; GO:0004674; GO:0005504; GO:0005524; GO:0005623; GO:0005634; GO:0005737; GO:0005739; GO:0005882; GO:0006163; GO:0006165; GO:0006183; GO:0006220; GO:0006228; GO:0006241; GO:0007189; GO:0007229; GO:0008144; GO:0009142; GO:0010976; GO:0019003; GO:0019215; GO:0019899; GO:0030027; GO:0031966; GO:0034599; GO:0042802; GO:0042981; GO:…	RecName: Full=Nucleoside diphosphate kinase B; Short=NDK B; Short=NDP kinase B; AltName: Full=Histidine protein kinase NDKB; AltName: Full=P18; AltName: Full=nm23-M2 - [NDKB_MOUSE]	61.18	1	4	10	245.751	1.32029e+09	8.7332e+08	1.45342e+09	1.25585e+09	27	24	26	44	28	25	27	45	152	17.3519	7.50342
Q78PY7	SND1	Staphylococcal nuclease domain-containing protein 1	FUNCTION: Endonuclease that mediates miRNA decay of both protein-free and AGO2-loaded miRNAs (By similarity). As part of its function in miRNA decay, regulates mRNAs involved in G1-to-S phase transition (By similarity). Functions as a bridging factor between STAT6 and the basal transcription factor (By similarity). Plays a role in PIM1 regulation of MYB activity (By similarity). Functions as a tr…	SUBCELLULAR LOCATION: Cytoplasm {ECO:0000250|UniProtKB:Q7KZF4}. Nucleus {ECO:0000250|UniProtKB:Q7KZF4}. Melanosome {ECO:0000250|UniProtKB:Q7KZF4}. Note=In IL-4 stimulated cells colocalizes with STAT6 in the nucleus. {ECO:0000250|UniProtKB:Q7KZF4}.	gene silencing by RNA [GO:0031047]; miRNA catabolic process [GO:0010587]; regulation of cell cycle process [GO:0010564]; RNA catabolic process [GO:0006401]	cytoplasm [GO:0005737]; cytosol [GO:0005829]; dense body [GO:0097433]; melanosome [GO:0042470]; mitochondrion [GO:0005739]; nucleus [GO:0005634]; RISC complex [GO:0016442]	cytoplasm [GO:0005737]; cytosol [GO:0005829]; dense body [GO:0097433]; melanosome [GO:0042470]; mitochondrion [GO:0005739]; nucleus [GO:0005634]; RISC complex [GO:0016442]; endonuclease activity [GO:0004519]; endoribonuclease activity [GO:0004521]; nuclease activity [GO:0004518]; RISC complex binding [GO:1905172]; RNA binding [GO:0003723]; gene silencing by RNA [GO:0031047]; miRNA catabolic proce…	endonuclease activity [GO:0004519]; endoribonuclease activity [GO:0004521]; nuclease activity [GO:0004518]; RISC complex binding [GO:1905172]; RNA binding [GO:0003723]	GO:0003723; GO:0004518; GO:0004519; GO:0004521; GO:0005634; GO:0005737; GO:0005739; GO:0005829; GO:0006401; GO:0010564; GO:0010587; GO:0016442; GO:0031047; GO:0042470; GO:0097433; GO:1905172	RecName: Full=Staphylococcal nuclease domain-containing protein 1; AltName: Full=100 kDa coactivator; AltName: Full=p100 co-activator - [SND1_MOUSE]	39.56	1	25	25	331.053	1.57533e+08	9.58652e+07	1.71322e+08	1.28232e+08	48	29	43	43	49	30	44	44	910	102.025	7.43018
Q91VD9	NDUS1	NADH-ubiquinone oxidoreductase 75 kDa subunit, mitochondrial	FUNCTION: Core subunit of the mitochondrial membrane respiratory chain NADH dehydrogenase (Complex I) that is believed to belong to the minimal assembly required for catalysis. Complex I functions in the transfer of electrons from NADH to the respiratory chain. The immediate electron acceptor for the enzyme is believed to be ubiquinone (By similarity). This is the largest subunit of complex I and…	SUBCELLULAR LOCATION: Mitochondrion inner membrane {ECO:0000250}. Note=Matrix and cytoplasmic side of the mitochondrial inner membrane. {ECO:0000250}.	apoptotic mitochondrial changes [GO:0008637]; ATP metabolic process [GO:0046034]; ATP synthesis coupled electron transport [GO:0042773]; cellular respiration [GO:0045333]; reactive oxygen species metabolic process [GO:0072593]; regulation of mitochondrial membrane potential [GO:0051881]	mitochondrial intermembrane space [GO:0005758]; mitochondrial respiratory chain complex I [GO:0005747]; mitochondrion [GO:0005739]; myelin sheath [GO:0043209]	mitochondrial intermembrane space [GO:0005758]; mitochondrial respiratory chain complex I [GO:0005747]; mitochondrion [GO:0005739]; myelin sheath [GO:0043209]; 2 iron, 2 sulfur cluster binding [GO:0051537]; 4 iron, 4 sulfur cluster binding [GO:0051539]; electron transfer activity [GO:0009055]; metal ion binding [GO:0046872]; NADH dehydrogenase (ubiquinone) activity [GO:0008137]; apoptotic mitocho…	2 iron, 2 sulfur cluster binding [GO:0051537]; 4 iron, 4 sulfur cluster binding [GO:0051539]; electron transfer activity [GO:0009055]; metal ion binding [GO:0046872]; NADH dehydrogenase (ubiquinone) activity [GO:0008137]	GO:0005739; GO:0005747; GO:0005758; GO:0008137; GO:0008637; GO:0009055; GO:0042773; GO:0043209; GO:0045333; GO:0046034; GO:0046872; GO:0051537; GO:0051539; GO:0051881; GO:0072593	RecName: Full=NADH-ubiquinone oxidoreductase 75 kDa subunit, mitochondrial; AltName: Full=Complex I-75kD; Short=CI-75kD; Flags: Precursor - [NDUS1_MOUSE]	55.3	1	32	32	339.177	1.8466e+08	7.98813e+07	1.34746e+08	1.17151e+08	50	37	37	43	52	38	38	44	727	79.7256	5.71924
Q80W21	GSTM7	Glutathione S-transferase Mu 7	FUNCTION: Conjugation of reduced glutathione to a wide number of exogenous and endogenous hydrophobic electrophiles. {ECO:0000250|UniProtKB:P28161}.	SUBCELLULAR LOCATION: Cytoplasm {ECO:0000250|UniProtKB:P28161}.	cellular detoxification of nitrogen compound [GO:0070458]; cellular response to caffeine [GO:0071313]; glutathione metabolic process [GO:0006749]; linoleic acid metabolic process [GO:0043651]; negative regulation of ryanodine-sensitive calcium-release channel activity [GO:0060315]; nitrobenzene metabolic process [GO:0018916]; positive regulation of ryanodine-sensitive calcium-release channel acti…	cell [GO:0005623]; cytoplasm [GO:0005737]; cytosol [GO:0005829]; intercellular bridge [GO:0045171]; sarcoplasmic reticulum [GO:0016529]	cell [GO:0005623]; cytoplasm [GO:0005737]; cytosol [GO:0005829]; intercellular bridge [GO:0045171]; sarcoplasmic reticulum [GO:0016529]; enzyme binding [GO:0019899]; fatty acid binding [GO:0005504]; glutathione binding [GO:0043295]; glutathione peroxidase activity [GO:0004602]; glutathione transferase activity [GO:0004364]; protein homodimerization activity [GO:0042803]; signaling receptor bindin…	enzyme binding [GO:0019899]; fatty acid binding [GO:0005504]; glutathione binding [GO:0043295]; glutathione peroxidase activity [GO:0004602]; glutathione transferase activity [GO:0004364]; protein homodimerization activity [GO:0042803]; signaling receptor binding [GO:0005102]	GO:0004364; GO:0004602; GO:0005102; GO:0005504; GO:0005623; GO:0005737; GO:0005829; GO:0006749; GO:0010880; GO:0016529; GO:0018916; GO:0019899; GO:0042178; GO:0042803; GO:0043295; GO:0043651; GO:0045171; GO:0060315; GO:0060316; GO:0070458; GO:0071313	RecName: Full=Glutathione S-transferase Mu 7; AltName: Full=GST class-mu 7; Short=GSTM-7 - [GSTM7_MOUSE]	44.5	1	3	10	280.278	6.86358e+09	3.08352e+09	8.03001e+09	6.62267e+09	32	27	36	43	33	28	37	44	218	25.6929	6.80029
Q6XVG2	CP254	Cytochrome P450 2C54	FUNCTION: Metabolizes arachidonic acid mainly to 12-hydroxyeicosatetraenoic acid (HETE). {ECO:0000269|PubMed:15102943}.	SUBCELLULAR LOCATION: Endoplasmic reticulum membrane {ECO:0000269|PubMed:15102943}; Peripheral membrane protein {ECO:0000269|PubMed:15102943}. Microsome membrane {ECO:0000269|PubMed:15102943}; Peripheral membrane protein {ECO:0000269|PubMed:15102943}.	arachidonic acid metabolic process [GO:0019369]; epoxygenase P450 pathway [GO:0019373]; exogenous drug catabolic process [GO:0042738]; linoleic acid metabolic process [GO:0043651]; organic acid metabolic process [GO:0006082]; oxidation-reduction process [GO:0055114]; xenobiotic metabolic process [GO:0006805]	cytoplasm [GO:0005737]; endoplasmic reticulum membrane [GO:0005789]; intracellular membrane-bounded organelle [GO:0043231]	cytoplasm [GO:0005737]; endoplasmic reticulum membrane [GO:0005789]; intracellular membrane-bounded organelle [GO:0043231]; arachidonic acid epoxygenase activity [GO:0008392]; aromatase activity [GO:0070330]; heme binding [GO:0020037]; iron ion binding [GO:0005506]; linoleic acid epoxygenase activity [GO:0071614]; oxidoreductase activity, acting on paired donors, with incorporation or reduction o…	arachidonic acid epoxygenase activity [GO:0008392]; aromatase activity [GO:0070330]; heme binding [GO:0020037]; iron ion binding [GO:0005506]; linoleic acid epoxygenase activity [GO:0071614]; oxidoreductase activity, acting on paired donors, with incorporation or reduction of molecular oxygen, reduced flavin or flavoprotein as one donor, and incorporation of one atom of oxygen [GO:0016712]; stero…	GO:0005506; GO:0005737; GO:0005789; GO:0006082; GO:0006805; GO:0008392; GO:0008395; GO:0016712; GO:0019369; GO:0019373; GO:0020037; GO:0042738; GO:0043231; GO:0043651; GO:0055114; GO:0070330; GO:0071614	RecName: Full=Cytochrome P450 2C54; AltName: Full=CYPIIC54 - [CP254_MOUSE]	41.63	1	6	20	320.898	7.97285e+08	7.48612e+08	5.10203e+08	7.48985e+08	48	44	23	43	49	45	24	44	490	55.8218	7.47412
Q91WU0	EST1F	Carboxylesterase 1F (EC 3.1.1.1) (Carboxylic ester hydrolase) (Triacylglycerol hydrolase 2) (TGH-2)	FUNCTION: Involved in the detoxification of xenobiotics and in the activation of ester and amide prodrugs. Hydrolyzes retinyl esters (By similarity). Hydrolyzes p-nitrophenyl butyrate (PNPB), triacylglycerol and monoacylglycerol. Shows higher activity against PNPB, a short-chain fatty acid ester, than against triolein, a long-chain fatty acid ester. Shows no detectable activity against diacylglyc…	SUBCELLULAR LOCATION: Lipid droplet {ECO:0000305|PubMed:16804080}. Cytoplasm, cytosol {ECO:0000269|PubMed:16804080}. Endoplasmic reticulum {ECO:0000269|PubMed:16804080}. Microsome {ECO:0000250|UniProtKB:Q64573}.	lipid catabolic process [GO:0016042]; short-chain fatty acid catabolic process [GO:0019626]	cytosol [GO:0005829]; endoplasmic reticulum [GO:0005783]; extracellular space [GO:0005615]; lipid droplet [GO:0005811]	cytosol [GO:0005829]; endoplasmic reticulum [GO:0005783]; extracellular space [GO:0005615]; lipid droplet [GO:0005811]; carboxylic ester hydrolase activity [GO:0052689]; methyl indole-3-acetate esterase activity [GO:0080030]; sterol esterase activity [GO:0004771]; triglyceride lipase activity [GO:0004806]; lipid catabolic process [GO:0016042]; short-chain fatty acid catabolic process [GO:0019626]	carboxylic ester hydrolase activity [GO:0052689]; methyl indole-3-acetate esterase activity [GO:0080030]; sterol esterase activity [GO:0004771]; triglyceride lipase activity [GO:0004806]	GO:0004771; GO:0004806; GO:0005615; GO:0005783; GO:0005811; GO:0005829; GO:0016042; GO:0019626; GO:0052689; GO:0080030	RecName: Full=Carboxylesterase 1F; AltName: Full=Carboxylic ester hydrolase; AltName: Full=Triacylglycerol hydrolase 2; Short=TGH-2; Flags: Precursor - [EST1F_MOUSE]	52.41	1	18	22	337.146	1.38543e+09	6.59706e+08	2.98677e+08	5.74772e+08	60	40	23	43	62	41	24	44	561	61.5732	6.48096
Q9DBF1	AL7A1	Alpha-aminoadipic semialdehyde dehydrogenase	FUNCTION: Multifunctional enzyme mediating important protective effects. Metabolizes betaine aldehyde to betaine, an important cellular osmolyte and methyl donor. Protects cells from oxidative stress by metabolizing a number of lipid peroxidation-derived aldehydes. Involved in lysine catabolism (By similarity). {ECO:0000250}.	SUBCELLULAR LOCATION: Cytoplasm, cytosol {ECO:0000250|UniProtKB:P49419}. Nucleus {ECO:0000250|UniProtKB:P49419}.; SUBCELLULAR LOCATION: [Isoform 1]: Mitochondrion {ECO:0000250|UniProtKB:P49419}.	glycine betaine biosynthetic process from choline [GO:0019285]	cytosol [GO:0005829]; mitochondrion [GO:0005739]; nucleus [GO:0005634]	cytosol [GO:0005829]; mitochondrion [GO:0005739]; nucleus [GO:0005634]; betaine-aldehyde dehydrogenase activity [GO:0008802]; glyceraldehyde-3-phosphate dehydrogenase (NAD+) (non-phosphorylating) activity [GO:0043878]; L-aminoadipate-semialdehyde dehydrogenase activity [GO:0004043]; glycine betaine biosynthetic process from choline [GO:0019285]	betaine-aldehyde dehydrogenase activity [GO:0008802]; glyceraldehyde-3-phosphate dehydrogenase (NAD+) (non-phosphorylating) activity [GO:0043878]; L-aminoadipate-semialdehyde dehydrogenase activity [GO:0004043]	GO:0004043; GO:0005634; GO:0005739; GO:0005829; GO:0008802; GO:0019285; GO:0043878	RecName: Full=Alpha-aminoadipic semialdehyde dehydrogenase; Short=Alpha-AASA dehydrogenase; AltName: Full=Aldehyde dehydrogenase family 7 member A1; AltName: Full=Antiquitin-1; AltName: Full=Betaine aldehyde dehydrogenase; AltName: Full=Delta1-piperideine-6-carboxylate dehydrogenase; Short=P6c dehydrogenase; Flags: Precursor - [AL7A1_MOUSE]	43.6	1	18	18	369.642	1039792740	4.96348e+08	6.79357e+08	6.73258e+08	50	44	46	42	52	45	47	43	539	58.8243	7.47412
P54071	IDHP	Isocitrate dehydrogenase [NADP], mitochondrial	FUNCTION: Plays a role in intermediary metabolism and energy production. It may tightly associate or interact with the pyruvate dehydrogenase complex.	SUBCELLULAR LOCATION: Mitochondrion.	2-oxoglutarate metabolic process [GO:0006103]; glyoxylate cycle [GO:0006097]; isocitrate metabolic process [GO:0006102]; NADP biosynthetic process [GO:0006741]; NADP metabolic process [GO:0006739]; negative regulation of glial cell migration [GO:1903976]; negative regulation of glial cell proliferation [GO:0060253]; negative regulation of matrix metallopeptidase secretion [GO:1904465]; tricarboxy…	cytosol [GO:0005829]; mitochondrial inner membrane [GO:0005743]; mitochondrion [GO:0005739]; peroxisome [GO:0005777]	cytosol [GO:0005829]; mitochondrial inner membrane [GO:0005743]; mitochondrion [GO:0005739]; peroxisome [GO:0005777]; isocitrate dehydrogenase (NADP+) activity [GO:0004450]; isocitrate dehydrogenase activity [GO:0004448]; magnesium ion binding [GO:0000287]; NAD binding [GO:0051287]; 2-oxoglutarate metabolic process [GO:0006103]; glyoxylate cycle [GO:0006097]; isocitrate metabolic process [GO:0006…	isocitrate dehydrogenase (NADP+) activity [GO:0004450]; isocitrate dehydrogenase activity [GO:0004448]; magnesium ion binding [GO:0000287]; NAD binding [GO:0051287]	GO:0000287; GO:0004448; GO:0004450; GO:0005739; GO:0005743; GO:0005777; GO:0005829; GO:0006097; GO:0006099; GO:0006102; GO:0006103; GO:0006739; GO:0006741; GO:0051287; GO:0060253; GO:1903976; GO:1904465	RecName: Full=Isocitrate dehydrogenase [NADP], mitochondrial; Short=IDH; AltName: Full=ICD-M; AltName: Full=IDP; AltName: Full=NADP(+)-specific ICDH; AltName: Full=Oxalosuccinate decarboxylase; Flags: Precursor - [IDHP_MOUSE]	48.45	2	24	25	300.588	8.32513e+08	3.69478e+08	5.61286e+08	4.87599e+08	36	34	36	42	37	35	37	43	452	50.8739	8.68994
Q9DB77	QCR2	Cytochrome b-c1 complex subunit 2, mitochondrial	FUNCTION: Component of the ubiquinol-cytochrome c oxidoreductase, a multisubunit transmembrane complex that is part of the mitochondrial electron transport chain which drives oxidative phosphorylation. The respiratory chain contains 3 multisubunit complexes succinate dehydrogenase (complex II, CII), ubiquinol-cytochrome c oxidoreductase (cytochrome b-c1 complex, complex III, CIII) and cytochrome …	SUBCELLULAR LOCATION: Mitochondrion inner membrane {ECO:0000250|UniProtKB:P07257}; Peripheral membrane protein {ECO:0000250|UniProtKB:P07257}; Matrix side {ECO:0000250|UniProtKB:P07257}.	oxidation-reduction process [GO:0055114]; protein processing involved in protein targeting to mitochondrion [GO:0006627]; response to drug [GO:0042493]	mitochondrial inner membrane [GO:0005743]; mitochondrial processing peptidase complex [GO:0017087]; mitochondrial respiratory chain complex III [GO:0005750]; mitochondrial respiratory chain complex IV [GO:0005751]; mitochondrion [GO:0005739]; myelin sheath [GO:0043209]; nucleoplasm [GO:0005654]	mitochondrial inner membrane [GO:0005743]; mitochondrial processing peptidase complex [GO:0017087]; mitochondrial respiratory chain complex III [GO:0005750]; mitochondrial respiratory chain complex IV [GO:0005751]; mitochondrion [GO:0005739]; myelin sheath [GO:0043209]; nucleoplasm [GO:0005654]; metal ion binding [GO:0046872]; metalloendopeptidase activity [GO:0004222]; protein-containing complex…	metal ion binding [GO:0046872]; metalloendopeptidase activity [GO:0004222]; protein-containing complex binding [GO:0044877]	GO:0004222; GO:0005654; GO:0005739; GO:0005743; GO:0005750; GO:0005751; GO:0006627; GO:0017087; GO:0042493; GO:0043209; GO:0044877; GO:0046872; GO:0055114	RecName: Full=Cytochrome b-c1 complex subunit 2, mitochondrial; AltName: Full=Complex III subunit 2; AltName: Full=Core protein II; AltName: Full=Ubiquinol-cytochrome-c reductase complex core protein 2; Flags: Precursor - [QCR2_MOUSE]	43.93	1	15	16	324.96	6.18411e+08	4.78865e+08	588381432	4.78862e+08	48	36	34	42	49	37	35	43	453	48.205	9.24658
P24456	CP2DA	Cytochrome P450 2D10	FUNCTION: Cytochromes P450 are a group of heme-thiolate monooxygenases. In liver microsomes, this enzyme is involved in an NADPH-dependent electron transport pathway. It oxidizes a variety of structurally unrelated compounds, including steroids, fatty acids, and xenobiotics.	SUBCELLULAR LOCATION: Endoplasmic reticulum membrane; Peripheral membrane protein. Microsome membrane; Peripheral membrane protein.	arachidonic acid metabolic process [GO:0019369]; exogenous drug catabolic process [GO:0042738]; organic acid metabolic process [GO:0006082]; oxidation-reduction process [GO:0055114]; xenobiotic metabolic process [GO:0006805]	cytoplasm [GO:0005737]; endoplasmic reticulum membrane [GO:0005789]; intracellular membrane-bounded organelle [GO:0043231]	cytoplasm [GO:0005737]; endoplasmic reticulum membrane [GO:0005789]; intracellular membrane-bounded organelle [GO:0043231]; aromatase activity [GO:0070330]; heme binding [GO:0020037]; iron ion binding [GO:0005506]; oxidoreductase activity, acting on paired donors, with incorporation or reduction of molecular oxygen, reduced flavin or flavoprotein as one donor, and incorporation of one atom of oxy…	aromatase activity [GO:0070330]; heme binding [GO:0020037]; iron ion binding [GO:0005506]; oxidoreductase activity, acting on paired donors, with incorporation or reduction of molecular oxygen, reduced flavin or flavoprotein as one donor, and incorporation of one atom of oxygen [GO:0016712]; steroid hydroxylase activity [GO:0008395]	GO:0005506; GO:0005737; GO:0005789; GO:0006082; GO:0006805; GO:0008395; GO:0016712; GO:0019369; GO:0020037; GO:0042738; GO:0043231; GO:0055114; GO:0070330	RecName: Full=Cytochrome P450 2D10; AltName: Full=CYPIID10; AltName: Full=Cytochrome P450-16-alpha; AltName: Full=Cytochrome P450CB; AltName: Full=Testosterone 16-alpha hydroxylase - [CP2DA_MOUSE]	44.64	2	10	24	316.836	5.59333e+08	5.82825e+08	3.09546e+08	2.46116e+08	41	41	32	42	42	42	33	43	504	57.1965	6.60986
P37040	NCPR	NADPH--cytochrome P450 reductase	FUNCTION: This enzyme is required for electron transfer from NADP to cytochrome P450 in microsomes. It can also provide electron transfer to heme oxygenase and cytochrome B5. {ECO:0000255|HAMAP-Rule:MF_03212}.	SUBCELLULAR LOCATION: Endoplasmic reticulum membrane {ECO:0000255|HAMAP-Rule:MF_03212}; Single-pass membrane protein {ECO:0000255|HAMAP-Rule:MF_03212}; Cytoplasmic side {ECO:0000255|HAMAP-Rule:MF_03212}.	carnitine metabolic process [GO:0009437]; cellular organofluorine metabolic process [GO:0090346]; cellular response to follicle-stimulating hormone stimulus [GO:0071372]; cellular response to peptide hormone stimulus [GO:0071375]; demethylation [GO:0070988]; fatty acid oxidation [GO:0019395]; flavonoid metabolic process [GO:0009812]; internal peptidyl-lysine acetylation [GO:0018393]; negative reg…	cytosol [GO:0005829]; endoplasmic reticulum membrane [GO:0005789]; integral component of membrane [GO:0016021]; intracellular membrane-bounded organelle [GO:0043231]; membrane [GO:0016020]; mitochondrion [GO:0005739]	cytosol [GO:0005829]; endoplasmic reticulum membrane [GO:0005789]; integral component of membrane [GO:0016021]; intracellular membrane-bounded organelle [GO:0043231]; membrane [GO:0016020]; mitochondrion [GO:0005739]; cytochrome-b5 reductase activity, acting on NAD(P)H [GO:0004128]; electron transfer activity [GO:0009055]; enzyme binding [GO:0019899]; flavin adenine dinucleotide binding [GO:00506…	cytochrome-b5 reductase activity, acting on NAD(P)H [GO:0004128]; electron transfer activity [GO:0009055]; enzyme binding [GO:0019899]; flavin adenine dinucleotide binding [GO:0050660]; FMN binding [GO:0010181]; hydrolase activity [GO:0016787]; iron-cytochrome-c reductase activity [GO:0047726]; NADP binding [GO:0050661]; NADPH-hemoprotein reductase activity [GO:0003958]; nitric oxide dioxygenase …	GO:0003420; GO:0003958; GO:0004128; GO:0005739; GO:0005789; GO:0005829; GO:0007584; GO:0008941; GO:0009055; GO:0009437; GO:0009725; GO:0009812; GO:0010181; GO:0016020; GO:0016021; GO:0016491; GO:0016709; GO:0016787; GO:0018393; GO:0019395; GO:0019899; GO:0032332; GO:0032770; GO:0042493; GO:0043066; GO:0043154; GO:0043231; GO:0043602; GO:0045542; GO:0045880; GO:0046210; GO:0047726; GO:0050660; GO:…	RecName: Full=NADPH--cytochrome P450 reductase; Short=CPR; Short=P450R - [NCPR_MOUSE]	39.97	1	23	23	286.371	3.17148e+08	2.58402e+08	3.91762e+08	3.46273e+08	33	36	30	42	34	37	31	43	678	76.9953	5.52881
P05201	AATC	Aspartate aminotransferase, cytoplasmic	FUNCTION: Biosynthesis of L-glutamate from L-aspartate or L-cysteine. Important regulator of levels of glutamate, the major excitatory neurotransmitter of the vertebrate central nervous system. Acts as a scavenger of glutamate in brain neuroprotection. The aspartate aminotransferase activity is involved in hepatic glucose synthesis during development and in adipocyte glyceroneogenesis. Using L-cy…	SUBCELLULAR LOCATION: Cytoplasm.	2-oxoglutarate metabolic process [GO:0006103]; aspartate biosynthetic process [GO:0006532]; aspartate catabolic process [GO:0006533]; aspartate metabolic process [GO:0006531]; cellular response to insulin stimulus [GO:0032869]; cellular response to mechanical stimulus [GO:0071260]; dicarboxylic acid metabolic process [GO:0043648]; fatty acid homeostasis [GO:0055089]; glutamate catabolic process t…	axon terminus [GO:0043679]; cell [GO:0005623]; cytoplasm [GO:0005737]; cytosol [GO:0005829]; lysosome [GO:0005764]; nucleoplasm [GO:0005654]	axon terminus [GO:0043679]; cell [GO:0005623]; cytoplasm [GO:0005737]; cytosol [GO:0005829]; lysosome [GO:0005764]; nucleoplasm [GO:0005654]; carboxylic acid binding [GO:0031406]; L-aspartate:2-oxoglutarate aminotransferase activity [GO:0004069]; L-cysteine:2-oxoglutarate aminotransferase activity [GO:0047801]; phosphatidylserine decarboxylase activity [GO:0004609]; pyridoxal phosphate binding [G…	carboxylic acid binding [GO:0031406]; L-aspartate:2-oxoglutarate aminotransferase activity [GO:0004069]; L-cysteine:2-oxoglutarate aminotransferase activity [GO:0047801]; phosphatidylserine decarboxylase activity [GO:0004609]; pyridoxal phosphate binding [GO:0030170]	GO:0004069; GO:0004609; GO:0005623; GO:0005654; GO:0005737; GO:0005764; GO:0005829; GO:0006103; GO:0006107; GO:0006114; GO:0006531; GO:0006532; GO:0006533; GO:0006536; GO:0007219; GO:0009743; GO:0019550; GO:0019551; GO:0030170; GO:0030511; GO:0031406; GO:0032869; GO:0032966; GO:0035902; GO:0043648; GO:0043679; GO:0046686; GO:0047801; GO:0051384; GO:0051481; GO:0051902; GO:0055089; GO:0060290; GO:…	RecName: Full=Aspartate aminotransferase, cytoplasmic; Short=cAspAT; AltName: Full=Cysteine aminotransferase, cytoplasmic; AltName: Full=Cysteine transaminase, cytoplasmic; Short=cCAT; AltName: Full=Glutamate oxaloacetate transaminase 1; AltName: Full=Transaminase A - [AATC_MOUSE]	51.57	1	17	17	255.906	3.62709e+08	2.22288e+08	3.51784e+08	3.37697e+08	27	27	30	42	28	28	31	43	413	46.2185	7.13721
Q63880	EST3A	Carboxylesterase 3A	FUNCTION: Involved in the detoxification of xenobiotics and in the activation of ester and amide prodrugs.	SUBCELLULAR LOCATION: Endoplasmic reticulum lumen. Note=Microsomal membrane, lumen of endoplasmic reticulum.	lipid catabolic process [GO:0016042]	endoplasmic reticulum lumen [GO:0005788]; extracellular space [GO:0005615]	endoplasmic reticulum lumen [GO:0005788]; extracellular space [GO:0005615]; carboxylic ester hydrolase activity [GO:0052689]; methyl indole-3-acetate esterase activity [GO:0080030]; sterol esterase activity [GO:0004771]; triglyceride lipase activity [GO:0004806]; lipid catabolic process [GO:0016042]	carboxylic ester hydrolase activity [GO:0052689]; methyl indole-3-acetate esterase activity [GO:0080030]; sterol esterase activity [GO:0004771]; triglyceride lipase activity [GO:0004806]	GO:0004771; GO:0004806; GO:0005615; GO:0005788; GO:0016042; GO:0052689; GO:0080030	RecName: Full=Carboxylesterase 3A; AltName: Full=ES-male; AltName: Full=Liver carboxylesterase 31; Short=Esterase-31; Flags: Precursor - [EST3A_MOUSE]	38.88	2	9	14	320.898	2.35293e+09	1.18025e+09	9.40919e+08	9.68787e+08	51	37	28	42	53	38	29	43	571	63.2774	6.13818
P51881	ADT2	ADP/ATP translocase 2	FUNCTION: Catalyzes the exchange of cytoplasmic ADP with mitochondrial ATP across the mitochondrial inner membrane. As part of the mitotic spindle-associated MMXD complex it may play a role in chromosome segregation (By similarity). {ECO:0000250}.	SUBCELLULAR LOCATION: Mitochondrion inner membrane; Multi-pass membrane protein.	adenine nucleotide transport [GO:0051503]; cellular response to leukemia inhibitory factor [GO:1990830]; chromosome segregation [GO:0007059]; negative regulation of mitochondrial outer membrane permeabilization involved in apoptotic signaling pathway [GO:1901029]; positive regulation of cell population proliferation [GO:0008284]	integral component of membrane [GO:0016021]; membrane raft [GO:0045121]; mitochondrial inner membrane [GO:0005743]; mitochondrial nucleoid [GO:0042645]; mitochondrion [GO:0005739]; MMXD complex [GO:0071817]; myelin sheath [GO:0043209]	integral component of membrane [GO:0016021]; membrane raft [GO:0045121]; mitochondrial inner membrane [GO:0005743]; mitochondrial nucleoid [GO:0042645]; mitochondrion [GO:0005739]; MMXD complex [GO:0071817]; myelin sheath [GO:0043209]; adenine nucleotide transmembrane transporter activity [GO:0000295]; ATP:ADP antiporter activity [GO:0005471]; ubiquitin protein ligase binding [GO:0031625]; adenin…	adenine nucleotide transmembrane transporter activity [GO:0000295]; ATP:ADP antiporter activity [GO:0005471]; ubiquitin protein ligase binding [GO:0031625]	GO:0000295; GO:0005471; GO:0005739; GO:0005743; GO:0007059; GO:0008284; GO:0016021; GO:0031625; GO:0042645; GO:0043209; GO:0045121; GO:0051503; GO:0071817; GO:1901029; GO:1990830	RecName: Full=ADP/ATP translocase 2; AltName: Full=ADP,ATP carrier protein 2; AltName: Full=Adenine nucleotide translocator 2; Short=ANT 2; AltName: Full=Solute carrier family 25 member 5; Contains: RecName: Full=ADP/ATP translocase 2, N-terminally processed - [ADT2_MOUSE]	46.64	3	14	14	331.053	1.25291e+09	6.48473e+08	6.5496e+08	7.8243e+08	48	35	39	41	49	36	40	42	298	32.9102	9.72998
Q8VDD5	MYH9	Myosin-9	FUNCTION: During cell spreading, plays an important role in cytoskeleton reorganization, focal contacts formation (in the margins but not the central part of spreading cells), and lamellipodial retraction; this function is mechanically antagonized by MYH10 (By similarity). Cellular myosin that appears to play a role in cytokinesis, cell shape, and specialized functions such as secretion and cappi…	SUBCELLULAR LOCATION: Cytoplasm, cytoskeleton {ECO:0000269|PubMed:19401332}. Cytoplasm, cell cortex {ECO:0000269|PubMed:19401332}. Note=Colocalizes with actin filaments at lamellipodia margins and at the leading edge of migrating cells (By similarity). In retinal pigment epithelial cells, predominantly localized to stress fiber-like structures with some localization to cytoplasmic puncta (By simi…	actin cytoskeleton reorganization [GO:0031532]; actin filament-based movement [GO:0030048]; actomyosin structure organization [GO:0031032]; angiogenesis [GO:0001525]; blood vessel endothelial cell migration [GO:0043534]; cell adhesion [GO:0007155]; cell-cell adhesion [GO:0098609]; cell morphogenesis involved in differentiation [GO:0000904]; cytokinetic process [GO:0032506]; establishment of meiot…	actin cytoskeleton [GO:0015629]; actomyosin [GO:0042641]; actomyosin contractile ring [GO:0005826]; adherens junction [GO:0005912]; brush border [GO:0005903]; cell [GO:0005623]; cell cortex [GO:0005938]; cell leading edge [GO:0031252]; cleavage furrow [GO:0032154]; COP9 signalosome [GO:0008180]; cortical cytoskeleton [GO:0030863]; cytoplasm [GO:0005737]; cytosol [GO:0005829]; immunological synaps…	actin cytoskeleton [GO:0015629]; actomyosin [GO:0042641]; actomyosin contractile ring [GO:0005826]; adherens junction [GO:0005912]; brush border [GO:0005903]; cell [GO:0005623]; cell cortex [GO:0005938]; cell leading edge [GO:0031252]; cleavage furrow [GO:0032154]; COP9 signalosome [GO:0008180]; cortical cytoskeleton [GO:0030863]; cytoplasm [GO:0005737]; cytosol [GO:0005829]; immunological synaps…	actin binding [GO:0003779]; actin-dependent ATPase activity [GO:0030898]; actin filament binding [GO:0051015]; ADP binding [GO:0043531]; ATPase activity [GO:0016887]; ATP binding [GO:0005524]; calmodulin binding [GO:0005516]; integrin binding [GO:0005178]; microfilament motor activity [GO:0000146]; protein domain specific binding [GO:0019904]; protein homodimerization activity [GO:0042803]; prote…	GO:0000146; GO:0000212; GO:0000904; GO:0001525; GO:0001701; GO:0001725; GO:0001726; GO:0001768; GO:0001772; GO:0001778; GO:0001931; GO:0003779; GO:0005178; GO:0005516; GO:0005524; GO:0005623; GO:0005634; GO:0005737; GO:0005826; GO:0005829; GO:0005886; GO:0005903; GO:0005912; GO:0005938; GO:0006509; GO:0006911; GO:0007155; GO:0007520; GO:0008180; GO:0008360; GO:0015031; GO:0015629; GO:0016459; GO:…	RecName: Full=Myosin-9; AltName: Full=Cellular myosin heavy chain, type A; AltName: Full=Myosin heavy chain 9; AltName: Full=Myosin heavy chain, non-muscle IIa; AltName: Full=Non-muscle myosin heavy chain A; Short=NMMHC-A; AltName: Full=Non-muscle myosin heavy chain IIa; Short=NMMHC II-a; Short=NMMHC-IIA - [MYH9_MOUSE]	30.97	4	43	48	333.084	6.02005e+07	3.9737e+07	1.45261e+08	3.49614e+07	31	19	74	40	32	20	76	41	1960	226.232	5.65576
O70475	UGDH	UDP-glucose 6-dehydrogenase	FUNCTION: Catalyzes the formation of UDP-alpha-D-glucuronate, a constituent of complex glycosaminoglycans (PubMed:9737970). Required for the biosynthesis of chondroitin sulfate and heparan sulfate. Required for embryonic development via its role in the biosynthesis of glycosaminoglycans (PubMed:14505572). {ECO:0000269|PubMed:14505572, ECO:0000269|PubMed:9737970}.		carbohydrate metabolic process [GO:0005975]; chondroitin sulfate biosynthetic process [GO:0030206]; gastrulation with mouth forming second [GO:0001702]; glycosaminoglycan biosynthetic process [GO:0006024]; heparan sulfate proteoglycan biosynthetic process [GO:0015012]; protein hexamerization [GO:0034214]; UDP-glucuronate biosynthetic process [GO:0006065]	cytosol [GO:0005829]; nucleoplasm [GO:0005654]; nucleus [GO:0005634]	cytosol [GO:0005829]; nucleoplasm [GO:0005654]; nucleus [GO:0005634]; NAD binding [GO:0051287]; UDP-glucose 6-dehydrogenase activity [GO:0003979]; carbohydrate metabolic process [GO:0005975]; chondroitin sulfate biosynthetic process [GO:0030206]; gastrulation with mouth forming second [GO:0001702]; glycosaminoglycan biosynthetic process [GO:0006024]; heparan sulfate proteoglycan biosynthetic proc…	NAD binding [GO:0051287]; UDP-glucose 6-dehydrogenase activity [GO:0003979]	GO:0001702; GO:0003979; GO:0005634; GO:0005654; GO:0005829; GO:0005975; GO:0006024; GO:0006065; GO:0015012; GO:0030206; GO:0034214; GO:0051287	RecName: Full=UDP-glucose 6-dehydrogenase; Short=UDP-Glc dehydrogenase; Short=UDP-GlcDH; Short=UDPGDH - [UGDH_MOUSE]	53.96	1	22	22	308.712	3.90508e+08	2.14337e+08	4.5037e+08	2.75953e+08	46	24	42	40	47	25	43	41	493	54.7973	7.56201
Q8VCW8	ACSF2	Acyl-CoA synthetase family member 2, mitochondrial	FUNCTION: Acyl-CoA synthases catalyze the initial reaction in fatty acid metabolism, by forming a thioester with CoA. Has some preference toward medium-chain substrates. Plays a role in adipocyte differentiation. {ECO:0000250|UniProtKB:Q96CM8}.	SUBCELLULAR LOCATION: Mitochondrion {ECO:0000305}.	fatty acid metabolic process [GO:0006631]	mitochondrion [GO:0005739]	mitochondrion [GO:0005739]; ATP binding [GO:0005524]; butyrate-CoA ligase activity [GO:0047760]; medium-chain fatty acid-CoA ligase activity [GO:0031956]; fatty acid metabolic process [GO:0006631]	ATP binding [GO:0005524]; butyrate-CoA ligase activity [GO:0047760]; medium-chain fatty acid-CoA ligase activity [GO:0031956]	GO:0005524; GO:0005739; GO:0006631; GO:0031956; GO:0047760	RecName: Full=Medium-chain acyl-CoA ligase ACSF2, mitochondrial; Flags: Precursor - [ACSF2_MOUSE]	53.01	1	24	24	335.115	661667410	4.31915e+08	3.86092e+08	397030234	50	35	40	40	52	36	41	41	615	67.907	8.17725
P45952	ACADM	Medium-chain specific acyl-CoA dehydrogenase, mitochondrial	FUNCTION: Acyl-CoA dehydrogenase specific for acyl chain lengths of 4 to 16 that catalyzes the initial step of fatty acid beta-oxidation. Utilizes the electron transfer flavoprotein (ETF) as an electron acceptor to transfer electrons to the main mitochondrial respiratory chain via ETF-ubiquinone oxidoreductase (ETF dehydrogenase). {ECO:0000250|UniProtKB:P11310}.	SUBCELLULAR LOCATION: Mitochondrion matrix {ECO:0000250}.	cardiac muscle cell differentiation [GO:0055007]; carnitine biosynthetic process [GO:0045329]; carnitine metabolic process [GO:0009437]; carnitine metabolic process, CoA-linked [GO:0019254]; fatty acid beta-oxidation [GO:0006635]; fatty acid beta-oxidation using acyl-CoA dehydrogenase [GO:0033539]; glycogen biosynthetic process [GO:0005978]; heart development [GO:0007507]; liver development [GO:0…	axon [GO:0030424]; mitochondrial matrix [GO:0005759]; mitochondrial membrane [GO:0031966]; mitochondrion [GO:0005739]	axon [GO:0030424]; mitochondrial matrix [GO:0005759]; mitochondrial membrane [GO:0031966]; mitochondrion [GO:0005739]; acyl-CoA dehydrogenase activity [GO:0003995]; fatty-acyl-CoA binding [GO:0000062]; flavin adenine dinucleotide binding [GO:0050660]; identical protein binding [GO:0042802]; isomerase activity [GO:0016853]; medium-chain-acyl-CoA dehydrogenase activity [GO:0070991]; cardiac muscle …	acyl-CoA dehydrogenase activity [GO:0003995]; fatty-acyl-CoA binding [GO:0000062]; flavin adenine dinucleotide binding [GO:0050660]; identical protein binding [GO:0042802]; isomerase activity [GO:0016853]; medium-chain-acyl-CoA dehydrogenase activity [GO:0070991]	GO:0000062; GO:0001889; GO:0003995; GO:0005739; GO:0005759; GO:0005978; GO:0006082; GO:0006111; GO:0006635; GO:0007507; GO:0009409; GO:0009437; GO:0009791; GO:0016853; GO:0019254; GO:0030424; GO:0031966; GO:0033539; GO:0042594; GO:0042802; GO:0045329; GO:0050660; GO:0051791; GO:0051793; GO:0055007; GO:0055114; GO:0070991	RecName: Full=Medium-chain specific acyl-CoA dehydrogenase, mitochondrial; Short=MCAD; Flags: Precursor - [ACADM_MOUSE]	40.62	1	16	16	292.464	4.84101e+08	286139694	552397361	2.91083e+08	35	32	37	40	36	33	38	41	421	46.4516	8.36768
Q63886	UD11	UDP-glucuronosyltransferase 1-1	FUNCTION: UDP-glucuronosyltransferase (UGT) that catalyzes phase II biotransformation reactions in which lipophilic substrates are conjugated with glucuronic acid to increase the metabolite's water solubility, thereby facilitating excretion into either the urine or bile (By similarity). Essential for the elimination and detoxification of drugs, xenobiotics and endogenous compounds (By similarity)…	SUBCELLULAR LOCATION: Endoplasmic reticulum membrane {ECO:0000250|UniProtKB:P22309}; Single-pass membrane protein {ECO:0000250|UniProtKB:P22309}.	acute-phase response [GO:0006953]; animal organ regeneration [GO:0031100]; biphenyl catabolic process [GO:0070980]; cellular glucuronidation [GO:0052695]; cellular response to estradiol stimulus [GO:0071392]; cellular response to ethanol [GO:0071361]; cellular response to glucocorticoid stimulus [GO:0071385]; flavone metabolic process [GO:0051552]; flavonoid glucuronidation [GO:0052696]; liver de…	cytochrome complex [GO:0070069]; endoplasmic reticulum [GO:0005783]; endoplasmic reticulum chaperone complex [GO:0034663]; endoplasmic reticulum membrane [GO:0005789]; integral component of plasma membrane [GO:0005887]; intracellular membrane-bounded organelle [GO:0043231]	cytochrome complex [GO:0070069]; endoplasmic reticulum [GO:0005783]; endoplasmic reticulum chaperone complex [GO:0034663]; endoplasmic reticulum membrane [GO:0005789]; integral component of plasma membrane [GO:0005887]; intracellular membrane-bounded organelle [GO:0043231]; enzyme binding [GO:0019899]; enzyme inhibitor activity [GO:0004857]; glucuronosyltransferase activity [GO:0015020]; protein …	enzyme binding [GO:0019899]; enzyme inhibitor activity [GO:0004857]; glucuronosyltransferase activity [GO:0015020]; protein heterodimerization activity [GO:0046982]; protein homodimerization activity [GO:0042803]; retinoic acid binding [GO:0001972]; steroid binding [GO:0005496]	GO:0001889; GO:0001972; GO:0004857; GO:0005496; GO:0005783; GO:0005789; GO:0005887; GO:0006953; GO:0007584; GO:0010033; GO:0015020; GO:0019899; GO:0031100; GO:0032496; GO:0034663; GO:0042594; GO:0042803; GO:0043231; GO:0046982; GO:0051552; GO:0052695; GO:0052696; GO:0052697; GO:0070069; GO:0070980; GO:0071361; GO:0071385; GO:0071392; GO:2001030	RecName: Full=UDP-glucuronosyltransferase 1A1; Short=UGT1A1; AltName: Full=UDP-glucuronosyltransferase 1-1; Short=UDPGT 1-1; Short=UGT1*1; Short=UGT1-01; Short=UGT1.1; AltName: Full=UGTBR1; Flags: Precursor - [UD11_MOUSE]	36.26	3	10	14	339.177	2.1631e+09	1.16262e+09	9.4045e+08	1.04097e+09	50	41	36	40	52	42	37	41	535	60.008	8.6167
Q9JKR6	HYOU1	Hypoxia up-regulated protein 1	FUNCTION: Has a pivotal role in cytoprotective cellular mechanisms triggered by oxygen deprivation. May play a role as a molecular chaperone and participate in protein folding (By similarity). {ECO:0000250}.	SUBCELLULAR LOCATION: Endoplasmic reticulum lumen {ECO:0000269|PubMed:7641295}.	cellular response to hypoxia [GO:0071456]; endoplasmic reticulum to Golgi vesicle-mediated transport [GO:0006888]; negative regulation of apoptotic process [GO:0043066]; negative regulation of endoplasmic reticulum stress-induced neuron intrinsic apoptotic signaling pathway [GO:1903382]; negative regulation of hypoxia-induced intrinsic apoptotic signaling pathway [GO:1903298]; response to endopla…	endoplasmic reticulum [GO:0005783]; endoplasmic reticulum chaperone complex [GO:0034663]; endoplasmic reticulum lumen [GO:0005788]; extracellular region [GO:0005576]; smooth endoplasmic reticulum [GO:0005790]	endoplasmic reticulum [GO:0005783]; endoplasmic reticulum chaperone complex [GO:0034663]; endoplasmic reticulum lumen [GO:0005788]; extracellular region [GO:0005576]; smooth endoplasmic reticulum [GO:0005790]; ATP binding [GO:0005524]; cellular response to hypoxia [GO:0071456]; endoplasmic reticulum to Golgi vesicle-mediated transport [GO:0006888]; negative regulation of apoptotic process [GO:004…	ATP binding [GO:0005524]	GO:0001666; GO:0002931; GO:0005524; GO:0005576; GO:0005783; GO:0005788; GO:0005790; GO:0006888; GO:0034663; GO:0034976; GO:0043066; GO:0071456; GO:1903298; GO:1903382	RecName: Full=Hypoxia up-regulated protein 1; Short=GRP-170; AltName: Full=140 kDa Ca(2+)-binding protein; Short=CBP-140; Flags: Precursor - [HYOU1_MOUSE]	39.44	1	28	28	259.968	231667858	1.15457e+08	4.03907e+08	2.05806e+08	34	19	35	40	35	20	36	41	999	111.112	5.18604
Q9JII6	AK1A1	Alcohol dehydrogenase [NADP(+)]	FUNCTION: Catalyzes the NADPH-dependent reduction of a wide variety of carbonyl-containing compounds to their corresponding alcohols. Displays enzymatic activity towards endogenous metabolites such as aromatic and aliphatic aldehydes, ketones, monosaccharides and bile acids, with a preference for negatively charged substrates, such as glucuronate and succinic semialdehyde (By similarity) (PubMed:…	SUBCELLULAR LOCATION: Cytoplasm, cytosol {ECO:0000269|PubMed:15769935}. Apical cell membrane {ECO:0000269|PubMed:15769935}.	aldehyde catabolic process [GO:0046185]; cellular detoxification of aldehyde [GO:0110095]; daunorubicin metabolic process [GO:0044597]; D-glucuronate catabolic process [GO:0042840]; doxorubicin metabolic process [GO:0044598]; L-ascorbic acid biosynthetic process [GO:0019853]	apical plasma membrane [GO:0016324]; cytosol [GO:0005829]; synapse [GO:0045202]	apical plasma membrane [GO:0016324]; cytosol [GO:0005829]; synapse [GO:0045202]; alcohol dehydrogenase (NADP+) activity [GO:0008106]; alditol:NADP+ 1-oxidoreductase activity [GO:0004032]; allyl-alcohol dehydrogenase activity [GO:0047655]; glucuronolactone reductase activity [GO:0047941]; L-glucuronate reductase activity [GO:0047939]; mevaldate reductase (NADPH) activity [GO:0019726]; oxidoreducta…	alcohol dehydrogenase (NADP+) activity [GO:0008106]; alditol:NADP+ 1-oxidoreductase activity [GO:0004032]; allyl-alcohol dehydrogenase activity [GO:0047655]; glucuronolactone reductase activity [GO:0047941]; L-glucuronate reductase activity [GO:0047939]; mevaldate reductase (NADPH) activity [GO:0019726]; oxidoreductase activity [GO:0016491]	GO:0004032; GO:0005829; GO:0008106; GO:0016324; GO:0016491; GO:0019726; GO:0019853; GO:0042840; GO:0044597; GO:0044598; GO:0045202; GO:0046185; GO:0047655; GO:0047939; GO:0047941; GO:0110095	RecName: Full=Aldo-keto reductase family 1 member A1; AltName: Full=Alcohol dehydrogenase [NADP(+)]; AltName: Full=Aldehyde reductase; AltName: Full=Glucuronate reductase; AltName: Full=Glucuronolactone reductase - [AK1A1_MOUSE]	47.69	1	13	14	284.34	6.67672e+08	324853994	4.43998e+08	3.81589e+08	40	30	30	40	41	31	31	41	325	36.5639	7.38623
Q8QZR3	EST2A	Pyrethroid hydrolase Ces2a	FUNCTION: Carboxylesterases that catalyzes the hydrolysis of pyrethroids pesticides. Hydrolyzes permethrin faster than cypermethrin. Hydrolyzes retinyl esters (By similarity). {ECO:0000250|UniProtKB:Q8K3R0, ECO:0000269|PubMed:15123619}.	SUBCELLULAR LOCATION: Microsome {ECO:0000250|UniProtKB:Q8K3R0}.	protein glycosylation [GO:0006486]	extracellular space [GO:0005615]	extracellular space [GO:0005615]; carboxylic ester hydrolase activity [GO:0052689]; trans-permethrin hydrolase activity [GO:0102209]; protein glycosylation [GO:0006486]	carboxylic ester hydrolase activity [GO:0052689]; trans-permethrin hydrolase activity [GO:0102209]	GO:0005615; GO:0006486; GO:0052689; GO:0102209	RecName: Full=Pyrethroid hydrolase Ces2a; AltName: Full=Carboxylic ester hydrolase 2A; AltName: Full=carboxylesterase 2A; Flags: Precursor - [EST2A_MOUSE]	37.46	2	9	13	314.805	1.20231e+09	5.0616e+08	3.62347e+08	3.66922e+08	55	31	29	40	57	32	30	41	558	61.9002	6.16357
Q91XE0	GLYAT	Glycine N-acyltransferase	FUNCTION: Mitochondrial acyltransferase which transfers an acyl group to the N-terminus of glycine and glutamine, although much less efficiently. Can conjugate a multitude of substrates to form a variety of N-acylglycines, thereby detoxify xenobiotics, such as benzoic acid or salicylic acid, and endogenous organic acids, such as isovaleric acid. {ECO:0000250|UniProtKB:Q6IB77}.	SUBCELLULAR LOCATION: Mitochondrion {ECO:0000250|UniProtKB:Q6IB77}.	benzoyl-CoA metabolic process [GO:1901787]; glycine metabolic process [GO:0006544]; monocarboxylic acid metabolic process [GO:0032787]; response to toxic substance [GO:0009636]	mitochondrion [GO:0005739]	mitochondrion [GO:0005739]; glycine N-acyltransferase activity [GO:0047961]; glycine N-benzoyltransferase activity [GO:0047962]; benzoyl-CoA metabolic process [GO:1901787]; glycine metabolic process [GO:0006544]; monocarboxylic acid metabolic process [GO:0032787]; response to toxic substance [GO:0009636]	glycine N-acyltransferase activity [GO:0047961]; glycine N-benzoyltransferase activity [GO:0047962]	GO:0005739; GO:0006544; GO:0009636; GO:0032787; GO:0047961; GO:0047962; GO:1901787	RecName: Full=Glycine N-acyltransferase; AltName: Full=Acyl-CoA:glycine N-acyltransferase; Short=AAc; AltName: Full=Aralkyl acyl-CoA N-acyltransferase; AltName: Full=Aralkyl acyl-CoA:amino acid N-acyltransferase; AltName: Full=Benzoyl-coenzyme A:glycine N-acyltransferase; AltName: Full=Glycine N-benzoyltransferase - [GLYAT_MOUSE]	61.15	1	14	15	274.185	5.50816e+08	1.9656e+08	2.74574e+08	3.19526e+08	39	32	24	40	40	33	25	41	296	34.076	8.27979
Q91XD4	FTCD	Formimidoyltransferase-cyclodeaminase	FUNCTION: Folate-dependent enzyme, that displays both transferase and deaminase activity. Serves to channel one-carbon units from formiminoglutamate to the folate pool (By similarity). {ECO:0000250}.; FUNCTION: Binds and promotes bundling of vimentin filaments originating from the Golgi. {ECO:0000250}.	SUBCELLULAR LOCATION: Cytoplasm, cytoskeleton, microtubule organizing center, centrosome, centriole {ECO:0000250}. Golgi apparatus {ECO:0000250}. Note=More abundantly located around the mother centriole. {ECO:0000250}.	cytoskeleton organization [GO:0007010]; histidine catabolic process [GO:0006548]; histidine catabolic process to glutamate and formamide [GO:0019556]; histidine catabolic process to glutamate and formate [GO:0019557]; tetrahydrofolate interconversion [GO:0035999]	centriole [GO:0005814]; cytosol [GO:0005829]; endoplasmic reticulum [GO:0005783]; endoplasmic reticulum-Golgi intermediate compartment [GO:0005793]; Golgi apparatus [GO:0005794]; Golgi membrane [GO:0000139]; plasma membrane [GO:0005886]; smooth endoplasmic reticulum membrane [GO:0030868]	centriole [GO:0005814]; cytosol [GO:0005829]; endoplasmic reticulum [GO:0005783]; endoplasmic reticulum-Golgi intermediate compartment [GO:0005793]; Golgi apparatus [GO:0005794]; Golgi membrane [GO:0000139]; plasma membrane [GO:0005886]; smooth endoplasmic reticulum membrane [GO:0030868]; folic acid binding [GO:0005542]; formimidoyltetrahydrofolate cyclodeaminase activity [GO:0030412]; formimidoy…	folic acid binding [GO:0005542]; formimidoyltetrahydrofolate cyclodeaminase activity [GO:0030412]; formimidoyltransferase activity [GO:0030407]; glutamate formimidoyltransferase activity [GO:0030409]; microtubule binding [GO:0008017]	GO:0000139; GO:0005542; GO:0005783; GO:0005793; GO:0005794; GO:0005814; GO:0005829; GO:0005886; GO:0006548; GO:0007010; GO:0008017; GO:0019556; GO:0019557; GO:0030407; GO:0030409; GO:0030412; GO:0030868; GO:0035999	RecName: Full=Formimidoyltransferase-cyclodeaminase; AltName: Full=Formiminotransferase-cyclodeaminase; Short=FTCD; Includes: RecName: Full=Glutamate formimidoyltransferase; AltName: Full=Glutamate formiminotransferase; AltName: Full=Glutamate formyltransferase; Includes: RecName: Full=Formimidoyltetrahydrofolate cyclodeaminase; AltName: Full=Formiminotetrahydrofolate cyclodeaminase - [FTCD_MOUSE]	61	1	23	23	398.076	427911328	2.28518e+08	3.09106e+08	1.77664e+08	56	50	51	39	58	52	53	40	541	58.9015	6.11279
P17742	PPIA	Peptidyl-prolyl cis-trans isomerase A	FUNCTION: PPIase that catalyzes the cis-trans isomerization of proline imidic peptide bonds in oligopeptides and may therefore assist protein folding. {ECO:0000250|UniProtKB:P62937}.	SUBCELLULAR LOCATION: Cytoplasm. Secreted {ECO:0000250}. Note=Secretion occurs in response to oxidative stress in vascular smooth muscle through a vesicular secretory pathway that involves actin remodeling and myosin II activation, and mediates ERK1/2 activation. {ECO:0000250}.	lipid droplet organization [GO:0034389]; neuron differentiation [GO:0030182]; positive regulation of protein secretion [GO:0050714]; positive regulation of viral genome replication [GO:0045070]; protein peptidyl-prolyl isomerization [GO:0000413]; protein refolding [GO:0042026]; regulation of viral genome replication [GO:0045069]	cytosol [GO:0005829]; extracellular space [GO:0005615]; myelin sheath [GO:0043209]; nucleus [GO:0005634]; protein-containing complex [GO:0032991]	cytosol [GO:0005829]; extracellular space [GO:0005615]; myelin sheath [GO:0043209]; nucleus [GO:0005634]; protein-containing complex [GO:0032991]; cyclosporin A binding [GO:0016018]; peptidyl-prolyl cis-trans isomerase activity [GO:0003755]; unfolded protein binding [GO:0051082]; lipid droplet organization [GO:0034389]; neuron differentiation [GO:0030182]; positive regulation of protein secretion…	cyclosporin A binding [GO:0016018]; peptidyl-prolyl cis-trans isomerase activity [GO:0003755]; unfolded protein binding [GO:0051082]	GO:0000413; GO:0003755; GO:0005615; GO:0005634; GO:0005829; GO:0016018; GO:0030182; GO:0032991; GO:0034389; GO:0042026; GO:0043209; GO:0045069; GO:0045070; GO:0050714; GO:0051082	RecName: Full=Peptidyl-prolyl cis-trans isomerase A; Short=PPIase A; AltName: Full=Cyclophilin A; AltName: Full=Cyclosporin A-binding protein; AltName: Full=Rotamase A; AltName: Full=SP18; Contains: RecName: Full=Peptidyl-prolyl cis-trans isomerase A, N-terminally processed - [PPIA_MOUSE]	50.61	2	7	7	337.146	2.58323e+09	1.21203e+09	1.95918e+09	1.74745e+09	44	41	42	39	45	42	43	40	164	17.9599	7.89893
Q8QZT1	THIL	Acetyl-CoA acetyltransferase, mitochondrial	FUNCTION: This is one of the enzymes that catalyzes the last step of the mitochondrial beta-oxidation pathway, an aerobic process breaking down fatty acids into acetyl-CoA. Using free coenzyme A/CoA, catalyzes the thiolytic cleavage of medium- to long-chain 3-oxoacyl-CoAs into acetyl-CoA and a fatty acyl-CoA shortened by two carbon atoms. The activity of the enzyme is reversible and it can also c…	SUBCELLULAR LOCATION: Mitochondrion {ECO:0000250|UniProtKB:P24752}.	acetyl-CoA biosynthetic process [GO:0006085]; acetyl-CoA catabolic process [GO:0046356]; adipose tissue development [GO:0060612]; brain development [GO:0007420]; coenzyme A biosynthetic process [GO:0015937]; coenzyme A metabolic process [GO:0015936]; fatty acid beta-oxidation [GO:0006635]; isoleucine catabolic process [GO:0006550]; ketone body catabolic process [GO:0046952]; liver development [GO…	mitochondrial inner membrane [GO:0005743]; mitochondrial matrix [GO:0005759]; mitochondrion [GO:0005739]	mitochondrial inner membrane [GO:0005743]; mitochondrial matrix [GO:0005759]; mitochondrion [GO:0005739]; acetyl-CoA C-acetyltransferase activity [GO:0003985]; acetyl-CoA C-acyltransferase activity [GO:0003988]; C-acetyltransferase activity [GO:0016453]; coenzyme binding [GO:0050662]; enzyme binding [GO:0019899]; identical protein binding [GO:0042802]; potassium ion binding [GO:0030955]; acetyl-C…	acetyl-CoA C-acetyltransferase activity [GO:0003985]; acetyl-CoA C-acyltransferase activity [GO:0003988]; C-acetyltransferase activity [GO:0016453]; coenzyme binding [GO:0050662]; enzyme binding [GO:0019899]; identical protein binding [GO:0042802]; potassium ion binding [GO:0030955]	GO:0001889; GO:0003985; GO:0003988; GO:0005739; GO:0005743; GO:0005759; GO:0006085; GO:0006550; GO:0006635; GO:0007420; GO:0009725; GO:0014070; GO:0015936; GO:0015937; GO:0016453; GO:0019899; GO:0030955; GO:0042594; GO:0042802; GO:0046356; GO:0046952; GO:0050662; GO:0060612; GO:0072229; GO:1902860	RecName: Full=Acetyl-CoA acetyltransferase, mitochondrial; AltName: Full=Acetoacetyl-CoA thiolase; Flags: Precursor - [THIL_MOUSE]	53.07	1	16	16	314.805	1.26953e+09	5.46267e+08	8.36561e+08	6.18659e+08	45	35	36	39	46	36	37	40	424	44.7873	8.51416
P97872	FMO5	Dimethylaniline monooxygenase [N-oxide-forming] 5	FUNCTION: Acts as Baeyer-Villiger monooxygenase on a broad range of substrates. Catalyzes the insertion of an oxygen atom into a carbon-carbon bond adjacent to a carbonyl, which converts ketones to esters. Active on diverse carbonyl compounds, whereas soft nucleophiles are mostly non- or poorly reactive. In contrast with other forms of FMO it is non- or poorly active on 'classical' substrates suc…	SUBCELLULAR LOCATION: Microsome membrane {ECO:0000250|UniProtKB:P49326}. Endoplasmic reticulum membrane {ECO:0000250|UniProtKB:P49326}.	drug metabolic process [GO:0017144]; NADPH oxidation [GO:0070995]; oxidation-reduction process [GO:0055114]; regulation of cholesterol metabolic process [GO:0090181]	cytosol [GO:0005829]; endoplasmic reticulum [GO:0005783]; endoplasmic reticulum membrane [GO:0005789]; integral component of membrane [GO:0016021]	cytosol [GO:0005829]; endoplasmic reticulum [GO:0005783]; endoplasmic reticulum membrane [GO:0005789]; integral component of membrane [GO:0016021]; aldehyde oxidase activity [GO:0004031]; flavin adenine dinucleotide binding [GO:0050660]; monooxygenase activity [GO:0004497]; N,N-dimethylaniline monooxygenase activity [GO:0004499]; NADP binding [GO:0050661]; drug metabolic process [GO:0017144]; NAD…	aldehyde oxidase activity [GO:0004031]; flavin adenine dinucleotide binding [GO:0050660]; monooxygenase activity [GO:0004497]; N,N-dimethylaniline monooxygenase activity [GO:0004499]; NADP binding [GO:0050661]	GO:0004031; GO:0004497; GO:0004499; GO:0005783; GO:0005789; GO:0005829; GO:0016021; GO:0017144; GO:0050660; GO:0050661; GO:0055114; GO:0070995; GO:0090181	RecName: Full=Flavin-containing monooxygenase 5; Short=FMO 5; AltName: Full=Dimethylaniline monooxygenase [N-oxide-forming] 5; AltName: Full=Dimethylaniline oxidase 5; AltName: Full=Hepatic flavin-containing monooxygenase 5; AltName: Full=NAPDH oxidase - [FMO5_MOUSE]	50.09	1	25	25	290.433	9.39581e+08	493954786	8.70272e+08	7.14778e+08	40	32	32	39	41	33	33	40	533	59.962	8.73389
G3X982	AOXC	Aldehyde oxidase 3	FUNCTION: Oxidase with broad substrate specificity, oxidizing aromatic azaheterocycles, such as N1-methylnicotinamide and phthalazine, as well as aldehydes, such as benzaldehyde, retinal and pyridoxal. Plays a key role in the metabolism of xenobiotics and drugs containing aromatic azaheterocyclic substituents. Is probably involved in the regulation of reactive oxygen species homeostasis. May be a…	SUBCELLULAR LOCATION: Cytoplasm {ECO:0000269|PubMed:11562361, ECO:0000269|PubMed:15383531}.	drug metabolic process [GO:0017144]; xanthine catabolic process [GO:0009115]	cytosol [GO:0005829]	cytosol [GO:0005829]; 2 iron, 2 sulfur cluster binding [GO:0051537]; aldehyde oxidase activity [GO:0004031]; electron transfer activity [GO:0009055]; FAD binding [GO:0071949]; flavin adenine dinucleotide binding [GO:0050660]; geranial:oxygen oxidoreductase activity [GO:0102797]; heptaldehyde:oxygen oxidoreductase activity [GO:0102798]; iron ion binding [GO:0005506]; molybdenum ion binding [GO:003…	2 iron, 2 sulfur cluster binding [GO:0051537]; aldehyde oxidase activity [GO:0004031]; electron transfer activity [GO:0009055]; FAD binding [GO:0071949]; flavin adenine dinucleotide binding [GO:0050660]; geranial:oxygen oxidoreductase activity [GO:0102797]; heptaldehyde:oxygen oxidoreductase activity [GO:0102798]; iron ion binding [GO:0005506]; molybdenum ion binding [GO:0030151]; molybdopterin c…	GO:0004031; GO:0004854; GO:0005506; GO:0005829; GO:0009055; GO:0009115; GO:0017144; GO:0030151; GO:0042803; GO:0043546; GO:0050250; GO:0050660; GO:0051287; GO:0051537; GO:0071949; GO:0102797; GO:0102798	RecName: Full=Aldehyde oxidase 3; AltName: Full=Aldehyde oxidase homolog 1; AltName: Full=Azaheterocycle hydroxylase 3 - [AOXC_MOUSE]	31.61	3	32	34	402.138	4.04679e+08	2.16172e+08	1.07934e+08	1.41483e+08	70	60	29	39	72	62	30	40	1335	146.807	6.45557
P40142	TKT	Transketolase	FUNCTION: Catalyzes the transfer of a two-carbon ketol group from a ketose donor to an aldose acceptor, via a covalent intermediate with the cofactor thiamine pyrophosphate. {ECO:0000250}.		glyceraldehyde-3-phosphate biosynthetic process [GO:0046166]; pentose-phosphate shunt [GO:0006098]; pentose-phosphate shunt, non-oxidative branch [GO:0009052]; regulation of growth [GO:0040008]; ribose phosphate biosynthetic process [GO:0046390]	endoplasmic reticulum membrane [GO:0005789]; intracellular membrane-bounded organelle [GO:0043231]; myelin sheath [GO:0043209]; nuclear body [GO:0016604]; nuclear speck [GO:0016607]; nucleoplasm [GO:0005654]; peroxisome [GO:0005777]	endoplasmic reticulum membrane [GO:0005789]; intracellular membrane-bounded organelle [GO:0043231]; myelin sheath [GO:0043209]; nuclear body [GO:0016604]; nuclear speck [GO:0016607]; nucleoplasm [GO:0005654]; peroxisome [GO:0005777]; carbohydrate binding [GO:0030246]; cofactor binding [GO:0048037]; magnesium ion binding [GO:0000287]; monosaccharide binding [GO:0048029]; protein homodimerization a…	carbohydrate binding [GO:0030246]; cofactor binding [GO:0048037]; magnesium ion binding [GO:0000287]; monosaccharide binding [GO:0048029]; protein homodimerization activity [GO:0042803]; thiamine pyrophosphate binding [GO:0030976]; transketolase activity [GO:0004802]	GO:0000287; GO:0004802; GO:0005654; GO:0005777; GO:0005789; GO:0006098; GO:0009052; GO:0016604; GO:0016607; GO:0030246; GO:0030976; GO:0040008; GO:0042803; GO:0043209; GO:0043231; GO:0046166; GO:0046390; GO:0048029; GO:0048037	RecName: Full=Transketolase; Short=TK; AltName: Full=P68 - [TKT_MOUSE]	44.14	1	24	24	333.084	7.45281e+08	4.07708e+08	7.18606e+08	4.68257e+08	42	43	41	38	43	44	42	39	623	67.5876	7.50342
P48036	ANXA5	Annexin A5	FUNCTION: This protein is an anticoagulant protein that acts as an indirect inhibitor of the thromboplastin-specific complex, which is involved in the blood coagulation cascade.		blood coagulation [GO:0007596]; cellular response to gonadotropin-releasing hormone [GO:0097211]; negative regulation of blood coagulation [GO:0030195]; negative regulation of prolactin secretion [GO:1902721]; positive regulation of apoptotic process [GO:0043065]; regulation of flagellated sperm motility [GO:1901317]; response to calcium ion [GO:0051592]; response to organic substance [GO:0010033]	axon terminus [GO:0043679]; cell projection [GO:0042995]; collagen-containing extracellular matrix [GO:0062023]; cytoplasm [GO:0005737]; cytosol [GO:0005829]; dendrite [GO:0030425]; endoplasmic reticulum [GO:0005783]; endothelial microparticle [GO:0072563]; external side of plasma membrane [GO:0009897]; extracellular space [GO:0005615]; intercalated disc [GO:0014704]; neuronal cell body [GO:00430…	axon terminus [GO:0043679]; cell projection [GO:0042995]; collagen-containing extracellular matrix [GO:0062023]; cytoplasm [GO:0005737]; cytosol [GO:0005829]; dendrite [GO:0030425]; endoplasmic reticulum [GO:0005783]; endothelial microparticle [GO:0072563]; external side of plasma membrane [GO:0009897]; extracellular space [GO:0005615]; intercalated disc [GO:0014704]; neuronal cell body [GO:00430…	calcium-dependent phospholipid binding [GO:0005544]; calcium ion binding [GO:0005509]; calcium transmembrane transporter activity, phosphorylative mechanism [GO:0005388]; identical protein binding [GO:0042802]; peptide hormone binding [GO:0017046]; receptor tyrosine kinase binding [GO:0030971]	GO:0005388; GO:0005509; GO:0005544; GO:0005615; GO:0005634; GO:0005737; GO:0005783; GO:0005829; GO:0005886; GO:0007596; GO:0008021; GO:0009897; GO:0010033; GO:0014704; GO:0017046; GO:0030018; GO:0030195; GO:0030425; GO:0030971; GO:0042383; GO:0042802; GO:0042995; GO:0043025; GO:0043065; GO:0043204; GO:0043679; GO:0051592; GO:0062023; GO:0072563; GO:0097211; GO:1901317; GO:1902721	RecName: Full=Annexin A5; AltName: Full=Anchorin CII; AltName: Full=Annexin V; AltName: Full=Annexin-5; AltName: Full=Calphobindin I; Short=CBP-I; AltName: Full=Endonexin II; AltName: Full=Lipocortin V; AltName: Full=Placental anticoagulant protein 4; Short=PP4; AltName: Full=Placental anticoagulant protein I; Short=PAP-I; AltName: Full=Thromboplastin inhibitor; AltName: Full=Vascular anticoagula…	52.66	1	16	16	243.72	2.24069e+08	1.52694e+08	4.7559e+08	3.16173e+08	24	21	37	38	25	22	38	39	319	35.7302	4.95752
Q9WVL0	MAAI	Maleylacetoacetate isomerase	FUNCTION: Probable bifunctional enzyme showing minimal glutathione-conjugating activity with ethacrynic acid and 7-chloro-4-nitrobenz-2-oxa-1, 3-diazole and maleylacetoacetate isomerase activity. Has also low glutathione peroxidase activity with t-butyl and cumene hydroperoxides. Is able to catalyze the glutathione dependent oxygenation of dichloroacetic acid to glyoxylic acid (By similarity). {E…	SUBCELLULAR LOCATION: Cytoplasm {ECO:0000250}.	glutathione metabolic process [GO:0006749]; L-phenylalanine catabolic process [GO:0006559]; tyrosine catabolic process [GO:0006572]	mitochondrion [GO:0005739]	mitochondrion [GO:0005739]; glutathione transferase activity [GO:0004364]; identical protein binding [GO:0042802]; maleylacetoacetate isomerase activity [GO:0016034]; protein homodimerization activity [GO:0042803]; glutathione metabolic process [GO:0006749]; L-phenylalanine catabolic process [GO:0006559]; tyrosine catabolic process [GO:0006572]	glutathione transferase activity [GO:0004364]; identical protein binding [GO:0042802]; maleylacetoacetate isomerase activity [GO:0016034]; protein homodimerization activity [GO:0042803]	GO:0004364; GO:0005739; GO:0006559; GO:0006572; GO:0006749; GO:0016034; GO:0042802; GO:0042803	RecName: Full=Maleylacetoacetate isomerase; Short=MAAI; AltName: Full=GSTZ1-1; AltName: Full=Glutathione S-transferase zeta 1 - [MAAI_MOUSE]	81.02	1	14	14	347.301	1.04524e+09	5.99158e+08	5.92155e+08	406706364	51	48	34	38	53	49	35	39	216	24.2598	7.85498
P52196	THTR	Thiosulfate sulfurtransferase	FUNCTION: Together with MRPL18, acts as a mitochondrial import factor for the cytosolic 5S rRNA. Only the nascent unfolded cytoplasmic form is able to bind to the 5S rRNA (By similarity). Formation of iron-sulfur complexes and cyanide detoxification. {ECO:0000250}.	SUBCELLULAR LOCATION: Mitochondrion matrix.	epithelial cell differentiation [GO:0030855]; rRNA import into mitochondrion [GO:0035928]; rRNA transport [GO:0051029]; transsulfuration [GO:0019346]	mitochondrial inner membrane [GO:0005743]; mitochondrial matrix [GO:0005759]; mitochondrion [GO:0005739]	mitochondrial inner membrane [GO:0005743]; mitochondrial matrix [GO:0005759]; mitochondrion [GO:0005739]; 5S rRNA binding [GO:0008097]; thiosulfate sulfurtransferase activity [GO:0004792]; epithelial cell differentiation [GO:0030855]; rRNA import into mitochondrion [GO:0035928]; rRNA transport [GO:0051029]; transsulfuration [GO:0019346]	5S rRNA binding [GO:0008097]; thiosulfate sulfurtransferase activity [GO:0004792]	GO:0004792; GO:0005739; GO:0005743; GO:0005759; GO:0008097; GO:0019346; GO:0030855; GO:0035928; GO:0051029	RecName: Full=Thiosulfate sulfurtransferase; AltName: Full=Rhodanese - [THTR_MOUSE]	44.78	2	13	14	290.433	1.35496e+09	6.873e+08	6.8618e+08	771699260	39	34	32	38	40	35	33	39	297	33.4448	7.85498
Q922R8	PDIA6	Protein disulfide-isomerase A6	FUNCTION: May function as a chaperone that inhibits aggregation of misfolded proteins (PubMed:24508390). Negatively regulates the unfolded protein response (UPR) through binding to UPR sensors such as ERN1, which in turn inactivates ERN1 signaling (By similarity). May also regulate the UPR via the EIF2AK3 UPR sensor (By similarity). Plays a role in platelet aggregation and activation by agonists …	SUBCELLULAR LOCATION: Endoplasmic reticulum lumen {ECO:0000250|UniProtKB:Q15084}. Cell membrane {ECO:0000250|UniProtKB:Q15084}. Melanosome {ECO:0000250|UniProtKB:Q15084}.	cell redox homeostasis [GO:0045454]; platelet activation [GO:0030168]; platelet aggregation [GO:0070527]	cell [GO:0005623]; cytosol [GO:0005829]; endoplasmic reticulum [GO:0005783]; endoplasmic reticulum chaperone complex [GO:0034663]; endoplasmic reticulum-Golgi intermediate compartment [GO:0005793]; endoplasmic reticulum lumen [GO:0005788]; extracellular space [GO:0005615]; melanosome [GO:0042470]; plasma membrane [GO:0005886]; smooth endoplasmic reticulum [GO:0005790]	cell [GO:0005623]; cytosol [GO:0005829]; endoplasmic reticulum [GO:0005783]; endoplasmic reticulum chaperone complex [GO:0034663]; endoplasmic reticulum lumen [GO:0005788]; endoplasmic reticulum-Golgi intermediate compartment [GO:0005793]; extracellular space [GO:0005615]; melanosome [GO:0042470]; plasma membrane [GO:0005886]; smooth endoplasmic reticulum [GO:0005790]; peptide disulfide oxidoredu…	peptide disulfide oxidoreductase activity [GO:0015037]; protein disulfide isomerase activity [GO:0003756]	GO:0003756; GO:0005615; GO:0005623; GO:0005783; GO:0005788; GO:0005790; GO:0005793; GO:0005829; GO:0005886; GO:0015037; GO:0030168; GO:0034663; GO:0042470; GO:0045454; GO:0070527	RecName: Full=Protein disulfide-isomerase A6; AltName: Full=Thioredoxin domain-containing protein 7; Flags: Precursor - [PDIA6_MOUSE]	44.55	1	15	15	247.782	5.6932e+08	3.07691e+08	8.27668e+08	5.45883e+08	34	19	31	38	35	20	32	39	440	48.0703	5.13525
Q921G7	ETFD	Electron transfer flavoprotein-ubiquinone oxidoreductase, mitochondrial	FUNCTION: Accepts electrons from ETF and reduces ubiquinone. {ECO:0000250}.	SUBCELLULAR LOCATION: Mitochondrion inner membrane {ECO:0000250}.	electron transport chain [GO:0022900]; fatty acid beta-oxidation using acyl-CoA dehydrogenase [GO:0033539]; respiratory electron transport chain [GO:0022904]; response to oxidative stress [GO:0006979]	integral component of mitochondrial inner membrane [GO:0031305]; membrane [GO:0016020]; mitochondrial electron transfer flavoprotein complex [GO:0017133]; mitochondrial inner membrane [GO:0005743]; mitochondrial membrane [GO:0031966]; mitochondrion [GO:0005739]	integral component of mitochondrial inner membrane [GO:0031305]; membrane [GO:0016020]; mitochondrial electron transfer flavoprotein complex [GO:0017133]; mitochondrial inner membrane [GO:0005743]; mitochondrial membrane [GO:0031966]; mitochondrion [GO:0005739]; 4 iron, 4 sulfur cluster binding [GO:0051539]; electron transfer activity [GO:0009055]; electron-transferring-flavoprotein dehydrogenase…	4 iron, 4 sulfur cluster binding [GO:0051539]; electron transfer activity [GO:0009055]; electron-transferring-flavoprotein dehydrogenase activity [GO:0004174]; iron-sulfur cluster binding [GO:0051536]; metal ion binding [GO:0046872]; oxidoreductase activity [GO:0016491]; oxidoreductase activity, oxidizing metal ions with flavin as acceptor [GO:0043783]; quinone binding [GO:0048038]; ubiquinone bi…	GO:0004174; GO:0005739; GO:0005743; GO:0006979; GO:0009055; GO:0016020; GO:0016491; GO:0017133; GO:0022900; GO:0022904; GO:0031305; GO:0031966; GO:0033539; GO:0043783; GO:0046872; GO:0048038; GO:0048039; GO:0051536; GO:0051539	RecName: Full=Electron transfer flavoprotein-ubiquinone oxidoreductase, mitochondrial; Short=ETF-QO; Short=ETF-ubiquinone oxidoreductase; AltName: Full=Electron-transferring-flavoprotein dehydrogenase; Short=ETF dehydrogenase; Flags: Precursor - [ETFD_MOUSE]	34.09	1	19	19	286.371	3.29739e+08	2.47513e+08	2.79857e+08	2.27241e+08	43	30	30	38	44	31	31	39	616	68.0476	7.57666
P35505	FAAA	Fumarylacetoacetase			arginine catabolic process [GO:0006527]; homogentisate catabolic process [GO:1902000]; L-phenylalanine catabolic process [GO:0006559]; tyrosine catabolic process [GO:0006572]		fumarylacetoacetase activity [GO:0004334]; metal ion binding [GO:0046872]; arginine catabolic process [GO:0006527]; homogentisate catabolic process [GO:1902000]; L-phenylalanine catabolic process [GO:0006559]; tyrosine catabolic process [GO:0006572]	fumarylacetoacetase activity [GO:0004334]; metal ion binding [GO:0046872]	GO:0004334; GO:0006527; GO:0006559; GO:0006572; GO:0046872; GO:1902000	RecName: Full=Fumarylacetoacetase; Short=FAA; AltName: Full=Beta-diketonase; AltName: Full=Fumarylacetoacetate hydrolase - [FAAA_MOUSE]	41.05	1	12	12	278.247	1.44121e+09	9.95394e+08	9.85798e+08	9.45309e+08	41	28	30	38	42	29	31	39	419	46.146	7.18115
O88451	RDH7	Retinol dehydrogenase 7	FUNCTION: Acts on androgens and retinols, i.e. has steroid 3-alpha- and 17-beta-dehydrogenase and cis/trans-retinol catalytic activities. {ECO:0000269|PubMed:9651397}.	SUBCELLULAR LOCATION: Microsome {ECO:0000250}. Endoplasmic reticulum {ECO:0000250}.	retinol metabolic process [GO:0042572]	endoplasmic reticulum [GO:0005783]	endoplasmic reticulum [GO:0005783]; catalytic activity [GO:0003824]; retinol dehydrogenase activity [GO:0004745]; retinol metabolic process [GO:0042572]	catalytic activity [GO:0003824]; retinol dehydrogenase activity [GO:0004745]	GO:0003824; GO:0004745; GO:0005783; GO:0042572	RecName: Full=Retinol dehydrogenase 7; AltName: Full=Cis-retinol/3alpha-hydroxysterol short-chain dehydrogenase isozyme 2; AltName: Full=Cis-retinol/androgen dehydrogenase type 2; Short=CRAD-2 - [RDH7_MOUSE]	51.9	1	7	17	284.34	9.47888e+08	733564518	607451081	517055447	34	42	26	38	35	43	27	39	316	35.6373	8.08936
Q8BVI4	DHPR	Dihydropteridine reductase	FUNCTION: The product of this enzyme, tetrahydrobiopterin (BH-4), is an essential cofactor for phenylalanine, tyrosine, and tryptophan hydroxylases. {ECO:0000250}.		cellular response to drug [GO:0035690]; liver development [GO:0001889]; L-phenylalanine catabolic process [GO:0006559]; response to aluminum ion [GO:0010044]; response to glucagon [GO:0033762]; response to lead ion [GO:0010288]; tetrahydrobiopterin biosynthetic process [GO:0006729]	cytoplasm [GO:0005737]; cytosol [GO:0005829]; mitochondrion [GO:0005739]; neuron projection [GO:0043005]	cytoplasm [GO:0005737]; cytosol [GO:0005829]; mitochondrion [GO:0005739]; neuron projection [GO:0043005]; 6,7-dihydropteridine reductase activity [GO:0004155]; identical protein binding [GO:0042802]; NADH binding [GO:0070404]; NADPH binding [GO:0070402]; cellular response to drug [GO:0035690]; L-phenylalanine catabolic process [GO:0006559]; liver development [GO:0001889]; response to aluminum ion…	6,7-dihydropteridine reductase activity [GO:0004155]; identical protein binding [GO:0042802]; NADH binding [GO:0070404]; NADPH binding [GO:0070402]	GO:0001889; GO:0004155; GO:0005737; GO:0005739; GO:0005829; GO:0006559; GO:0006729; GO:0010044; GO:0010288; GO:0033762; GO:0035690; GO:0042802; GO:0043005; GO:0070402; GO:0070404	RecName: Full=Dihydropteridine reductase; AltName: Full=HDHPR; AltName: Full=Quinoid dihydropteridine reductase - [DHPR_MOUSE]	63.9	1	13	13	257.937	6.76098e+08	3.403e+08	2.67377e+08	4.28508e+08	34	31	24	38	35	32	25	39	241	25.5538	7.81104
P14152	MDHC	Malate dehydrogenase, cytoplasmic		SUBCELLULAR LOCATION: Cytoplasm.	carbohydrate metabolic process [GO:0005975]; malate metabolic process [GO:0006108]; NADH metabolic process [GO:0006734]; NAD metabolic process [GO:0019674]; oxaloacetate metabolic process [GO:0006107]; tricarboxylic acid cycle [GO:0006099]	cytosol [GO:0005829]; mitochondrion [GO:0005739]; myelin sheath [GO:0043209]	cytosol [GO:0005829]; mitochondrion [GO:0005739]; myelin sheath [GO:0043209]; L-malate dehydrogenase activity [GO:0030060]; malate dehydrogenase activity [GO:0016615]; NAD binding [GO:0051287]; carbohydrate metabolic process [GO:0005975]; malate metabolic process [GO:0006108]; NAD metabolic process [GO:0019674]; NADH metabolic process [GO:0006734]; oxaloacetate metabolic process [GO:0006107]; tri…	L-malate dehydrogenase activity [GO:0030060]; malate dehydrogenase activity [GO:0016615]; NAD binding [GO:0051287]	GO:0005739; GO:0005829; GO:0005975; GO:0006099; GO:0006107; GO:0006108; GO:0006734; GO:0016615; GO:0019674; GO:0030060; GO:0043209; GO:0051287	RecName: Full=Malate dehydrogenase, cytoplasmic; AltName: Full=Cytosolic malate dehydrogenase - [MDHC_MOUSE]	31.14	1	10	10	302.619	2.68191e+09	1.34993e+09	1813438839	1.30917e+09	41	34	37	37	42	35	38	38	334	36.4881	6.58057
Q91WS4	BHMT2	S-methylmethionine--homocysteine S-methyltransferase BHMT2	FUNCTION: Involved in the regulation of homocysteine metabolism. Converts homocysteine to methionine using S-methylmethionine (SMM) as a methyl donor. {ECO:0000269|PubMed:18230605}.		L-methionine salvage [GO:0071267]; methionine biosynthetic process [GO:0009086]; methylation [GO:0032259]; S-adenosylmethionine metabolic process [GO:0046500]; S-methylmethionine metabolic process [GO:0033477]		betaine-homocysteine S-methyltransferase activity [GO:0047150]; S-adenosylmethionine-homocysteine S-methyltransferase activity [GO:0008898]; S-methylmethionine-homocysteine S-methyltransferase activity [GO:0061627]; zinc ion binding [GO:0008270]; L-methionine salvage [GO:0071267]; methionine biosynthetic process [GO:0009086]; methylation [GO:0032259]; S-adenosylmethionine metabolic process [GO:00…	betaine-homocysteine S-methyltransferase activity [GO:0047150]; S-adenosylmethionine-homocysteine S-methyltransferase activity [GO:0008898]; S-methylmethionine-homocysteine S-methyltransferase activity [GO:0061627]; zinc ion binding [GO:0008270]	GO:0008270; GO:0008898; GO:0009086; GO:0032259; GO:0033477; GO:0046500; GO:0047150; GO:0061627; GO:0071267	RecName: Full=S-methylmethionine--homocysteine S-methyltransferase BHMT2; Short=SMM-hcy methyltransferase; AltName: Full=Betaine--homocysteine S-methyltransferase 2 - [BHMT2_MOUSE]	12.67	1	1	4	235.596	1.51213e+09	3.22219e+09	2.1827e+09	4.16832e+09	22	30	27	37	23	31	28	38	363	39.846	6.53662
P02089	HBB2	Hemoglobin subunit beta-2	FUNCTION: Involved in oxygen transport from the lung to the various peripheral tissues.		cellular oxidant detoxification [GO:0098869]; erythrocyte development [GO:0048821]; hydrogen peroxide catabolic process [GO:0042744]; positive regulation of myeloid cell differentiation [GO:0045639]; regulation of erythrocyte differentiation [GO:0045646]	haptoglobin-hemoglobin complex [GO:0031838]; hemoglobin complex [GO:0005833]	haptoglobin-hemoglobin complex [GO:0031838]; hemoglobin complex [GO:0005833]; heme binding [GO:0020037]; hemoglobin alpha binding [GO:0031721]; metal ion binding [GO:0046872]; organic acid binding [GO:0043177]; oxygen binding [GO:0019825]; oxygen carrier activity [GO:0005344]; cellular oxidant detoxification [GO:0098869]; erythrocyte development [GO:0048821]; hydrogen peroxide catabolic process […	heme binding [GO:0020037]; hemoglobin alpha binding [GO:0031721]; metal ion binding [GO:0046872]; organic acid binding [GO:0043177]; oxygen binding [GO:0019825]; oxygen carrier activity [GO:0005344]	GO:0005344; GO:0005833; GO:0019825; GO:0020037; GO:0031721; GO:0031838; GO:0042744; GO:0043177; GO:0045639; GO:0045646; GO:0046872; GO:0048821; GO:0098869	RecName: Full=Hemoglobin subunit beta-2; AltName: Full=Beta-2-globin; AltName: Full=Hemoglobin beta-2 chain; AltName: Full=Hemoglobin beta-minor chain - [HBB2_MOUSE]	42.86	2	1	5	322.929	1.21523e+10	4.00218e+09	1.33469e+10	6.50242e+09	34	27	62	36	35	28	64	37	147	15.8683	8.04541
Q02053	UBA1	Ubiquitin-like modifier-activating enzyme 1	FUNCTION: Catalyzes the first step in ubiquitin conjugation to mark cellular proteins for degradation through the ubiquitin-proteasome system (PubMed:1511901). Activates ubiquitin by first adenylating its C-terminal glycine residue with ATP, and thereafter linking this residue to the side chain of a cysteine residue in E1, yielding a ubiquitin-E1 thioester and free AMP. Essential for the formatio…	SUBCELLULAR LOCATION: Cytoplasm {ECO:0000250|UniProtKB:P22314}. Mitochondrion {ECO:0000250|UniProtKB:P22314}. Nucleus {ECO:0000250|UniProtKB:P22314}.	cellular response to DNA damage stimulus [GO:0006974]; protein modification by small protein conjugation [GO:0032446]; protein ubiquitination [GO:0016567]; ubiquitin-dependent protein catabolic process [GO:0006511]	cytoplasm [GO:0005737]; cytosol [GO:0005829]; desmosome [GO:0030057]; endosome membrane [GO:0010008]; heterochromatin [GO:0000792]; lysosomal membrane [GO:0005765]; mitochondrion [GO:0005739]; nucleoplasm [GO:0005654]; nucleus [GO:0005634]; rough endoplasmic reticulum membrane [GO:0030867]	cytoplasm [GO:0005737]; cytosol [GO:0005829]; desmosome [GO:0030057]; endosome membrane [GO:0010008]; heterochromatin [GO:0000792]; lysosomal membrane [GO:0005765]; mitochondrion [GO:0005739]; nucleoplasm [GO:0005654]; nucleus [GO:0005634]; rough endoplasmic reticulum membrane [GO:0030867]; ATP binding [GO:0005524]; ubiquitin activating enzyme activity [GO:0004839]; cellular response to DNA damag…	ATP binding [GO:0005524]; ubiquitin activating enzyme activity [GO:0004839]	GO:0000792; GO:0004839; GO:0005524; GO:0005634; GO:0005654; GO:0005737; GO:0005739; GO:0005765; GO:0005829; GO:0006511; GO:0006974; GO:0010008; GO:0016567; GO:0030057; GO:0030867; GO:0032446	RecName: Full=Ubiquitin-like modifier-activating enzyme 1; AltName: Full=Ubiquitin-activating enzyme E1; AltName: Full=Ubiquitin-activating enzyme E1 X; AltName: Full=Ubiquitin-like modifier-activating enzyme 1 X - [UBA1_MOUSE]	32.42	1	18	24	302.619	1.63232e+08	1.03714e+08	1.64621e+08	1.36882e+08	41	31	41	36	42	32	42	37	1058	117.734	5.65576
Q8CGK3	LONM	Lon protease homolog, mitochondrial	FUNCTION: ATP-dependent serine protease that mediates the selective degradation of misfolded, unassembled or oxidatively damaged polypeptides as well as certain short-lived regulatory proteins in the mitochondrial matrix. May also have a chaperone function in the assembly of inner membrane protein complexes. Participates in the regulation of mitochondrial gene expression and in the maintenance of…	SUBCELLULAR LOCATION: Mitochondrion matrix {ECO:0000255|HAMAP-Rule:MF_03120, ECO:0000269|PubMed:12657466}.	aging [GO:0007568]; cellular protein-containing complex assembly [GO:0034622]; cellular response to oxidative stress [GO:0034599]; chaperone-mediated protein complex assembly [GO:0051131]; mitochondrion organization [GO:0007005]; oxidation-dependent protein catabolic process [GO:0070407]; protein quality control for misfolded or incompletely synthesized proteins [GO:0006515]; proteolysis [GO:0006…	cytosol [GO:0005829]; mitochondrial matrix [GO:0005759]; mitochondrial nucleoid [GO:0042645]; mitochondrion [GO:0005739]; nucleoplasm [GO:0005654]	cytosol [GO:0005829]; mitochondrial matrix [GO:0005759]; mitochondrial nucleoid [GO:0042645]; mitochondrion [GO:0005739]; nucleoplasm [GO:0005654]; ADP binding [GO:0043531]; ATP binding [GO:0005524]; ATP-dependent peptidase activity [GO:0004176]; ATPase activity [GO:0016887]; DNA polymerase binding [GO:0070182]; G-quadruplex DNA binding [GO:0051880]; identical protein binding [GO:0042802]; mitoch…	ADP binding [GO:0043531]; ATPase activity [GO:0016887]; ATP binding [GO:0005524]; ATP-dependent peptidase activity [GO:0004176]; DNA polymerase binding [GO:0070182]; G-quadruplex DNA binding [GO:0051880]; identical protein binding [GO:0042802]; mitochondrial promoter sequence-specific DNA binding [GO:0001018]; sequence-specific DNA binding [GO:0043565]; serine-type endopeptidase activity [GO:0004…	GO:0001018; GO:0001666; GO:0003697; GO:0003727; GO:0004176; GO:0004252; GO:0005524; GO:0005654; GO:0005739; GO:0005759; GO:0005829; GO:0006508; GO:0006515; GO:0007005; GO:0007568; GO:0009725; GO:0010044; GO:0016887; GO:0034599; GO:0034622; GO:0042645; GO:0042802; GO:0043531; GO:0043565; GO:0051131; GO:0051603; GO:0051880; GO:0070182; GO:0070407	RecName: Full=Lon protease homolog, mitochondrial; AltName: Full=Lon protease-like protein; Short=LONP; AltName: Full=Mitochondrial ATP-dependent protease Lon; AltName: Full=Serine protease 15; Flags: Precursor - [LONM_MOUSE]	32.24	1	24	24	237.627	1.06674e+08	3.77348e+07	1.55427e+08	105903446	29	14	38	36	30	14	39	37	949	105.776	6.56592
O55022	PGRC1	Membrane-associated progesterone receptor component 1	FUNCTION: Component of a progesterone-binding protein complex. Binds progesterone. Has many reported cellular functions (heme homeostasis, interaction with CYPs). Required for the maintenance of uterine histoarchitecture and normal female reproductive lifespan (PubMed:28005395). Intracellular heme chaperone. Regulates heme synthesis via interactions with FECH and acts as a heme donor for at least…	SUBCELLULAR LOCATION: Microsome membrane {ECO:0000250|UniProtKB:Q95250}; Single-pass membrane protein {ECO:0000255}. Endoplasmic reticulum membrane {ECO:0000250|UniProtKB:O00264}; Single-pass membrane protein {ECO:0000255}. Mitochondrion outer membrane {ECO:0000269|PubMed:27599036}; Single-pass membrane protein {ECO:0000305}; Extracellular side {ECO:0000269|PubMed:27599036}.	associative learning [GO:0008306]; heme biosynthetic process [GO:0006783]; memory [GO:0007613]; modification of synaptic structure [GO:0099563]; negative regulation of synapse organization [GO:1905809]; positive regulation of protein localization to plasma membrane [GO:1903078]	cell body [GO:0044297]; endomembrane system [GO:0012505]; endoplasmic reticulum membrane [GO:0005789]; integral component of membrane [GO:0016021]; membrane [GO:0016020]; mitochondrial outer membrane [GO:0005741]; neuronal cell body [GO:0043025]; neuron projection [GO:0043005]; synapse [GO:0045202]	cell body [GO:0044297]; endomembrane system [GO:0012505]; endoplasmic reticulum membrane [GO:0005789]; integral component of membrane [GO:0016021]; membrane [GO:0016020]; mitochondrial outer membrane [GO:0005741]; neuron projection [GO:0043005]; neuronal cell body [GO:0043025]; synapse [GO:0045202]; heme binding [GO:0020037]; metal ion binding [GO:0046872]; protein homodimerization activity [GO:0…	heme binding [GO:0020037]; metal ion binding [GO:0046872]; protein homodimerization activity [GO:0042803]; steroid binding [GO:0005496]	GO:0005496; GO:0005741; GO:0005789; GO:0006783; GO:0007613; GO:0008306; GO:0012505; GO:0016020; GO:0016021; GO:0020037; GO:0042803; GO:0043005; GO:0043025; GO:0044297; GO:0045202; GO:0046872; GO:0099563; GO:1903078; GO:1905809	RecName: Full=Membrane-associated progesterone receptor component 1; Short=mPR - [PGRC1_MOUSE]	67.18	1	14	16	284.34	1.11936e+09	8.1327e+08	6.19424e+08	8.48383e+08	44	28	32	36	45	29	33	37	195	21.6808	4.70361
P51174	ACADL	Long-chain specific acyl-CoA dehydrogenase, mitochondrial	FUNCTION: Long-chain specific acyl-CoA dehydrogenase is one of the acyl-CoA dehydrogenases that catalyze the first step of mitochondrial fatty acid beta-oxidation, an aerobic process breaking down fatty acids into acetyl-CoA and allowing the production of energy from fats. The first step of fatty acid beta-oxidation consists in the removal of one hydrogen from C-2 and C-3 of the straight-chain fa…	SUBCELLULAR LOCATION: Mitochondrion matrix {ECO:0000250|UniProtKB:P15650}.	carnitine catabolic process [GO:0042413]; carnitine metabolic process, CoA-linked [GO:0019254]; cellular lipid catabolic process [GO:0044242]; fatty acid beta-oxidation using acyl-CoA dehydrogenase [GO:0033539]; fatty acid catabolic process [GO:0009062]; long-chain fatty acid catabolic process [GO:0042758]; negative regulation of fatty acid biosynthetic process [GO:0045717]; negative regulation o…	mitochondrial matrix [GO:0005759]; mitochondrial membrane [GO:0031966]; mitochondrion [GO:0005739]	mitochondrial matrix [GO:0005759]; mitochondrial membrane [GO:0031966]; mitochondrion [GO:0005739]; acyl-CoA dehydrogenase activity [GO:0003995]; fatty-acyl-CoA binding [GO:0000062]; flavin adenine dinucleotide binding [GO:0050660]; identical protein binding [GO:0042802]; long-chain-acyl-CoA dehydrogenase activity [GO:0004466]; palmitoyl-CoA oxidase activity [GO:0016401]; carnitine catabolic proc…	acyl-CoA dehydrogenase activity [GO:0003995]; fatty-acyl-CoA binding [GO:0000062]; flavin adenine dinucleotide binding [GO:0050660]; identical protein binding [GO:0042802]; long-chain-acyl-CoA dehydrogenase activity [GO:0004466]; palmitoyl-CoA oxidase activity [GO:0016401]	GO:0000062; GO:0001659; GO:0003995; GO:0004466; GO:0005739; GO:0005759; GO:0009062; GO:0009409; GO:0016401; GO:0019254; GO:0031966; GO:0033539; GO:0042413; GO:0042758; GO:0042802; GO:0044242; GO:0045717; GO:0046322; GO:0050660; GO:0055114; GO:0090181; GO:0120162	RecName: Full=Long-chain specific acyl-CoA dehydrogenase, mitochondrial; Short=LCAD; Flags: Precursor - [ACADL_MOUSE]	36.51	1	14	14	253.875	6.38391e+08	2.74322e+08	506906903	4.10475e+08	34	25	30	36	35	26	31	37	430	47.8775	8.30908
Q61598	GDIB	Rab GDP dissociation inhibitor beta	FUNCTION: Regulates the GDP/GTP exchange reaction of most Rab proteins by inhibiting the dissociation of GDP from them, and the subsequent binding of GTP to them.	SUBCELLULAR LOCATION: Cytoplasm {ECO:0000250}. Membrane {ECO:0000250}; Peripheral membrane protein {ECO:0000250}.	protein transport [GO:0015031]; small GTPase mediated signal transduction [GO:0007264]; vesicle-mediated transport [GO:0016192]	cytoplasm [GO:0005737]; Golgi apparatus [GO:0005794]; membrane [GO:0016020]; myelin sheath [GO:0043209]; synapse [GO:0045202]	cytoplasm [GO:0005737]; Golgi apparatus [GO:0005794]; membrane [GO:0016020]; myelin sheath [GO:0043209]; synapse [GO:0045202]; GTPase activator activity [GO:0005096]; Rab GDP-dissociation inhibitor activity [GO:0005093]; Rab GTPase binding [GO:0017137]; small GTPase binding [GO:0031267]; protein transport [GO:0015031]; small GTPase mediated signal transduction [GO:0007264]; vesicle-mediated trans…	GTPase activator activity [GO:0005096]; Rab GDP-dissociation inhibitor activity [GO:0005093]; Rab GTPase binding [GO:0017137]; small GTPase binding [GO:0031267]	GO:0005093; GO:0005096; GO:0005737; GO:0005794; GO:0007264; GO:0015031; GO:0016020; GO:0016192; GO:0017137; GO:0031267; GO:0043209; GO:0045202	RecName: Full=Rab GDP dissociation inhibitor beta; Short=Rab GDI beta; AltName: Full=GDI-3; AltName: Full=Guanosine diphosphate dissociation inhibitor 2; Short=GDI-2 - [GDIB_MOUSE]	54.61	1	15	19	235.596	2.60445e+08	1.5783e+08	2.66493e+08	1.69043e+08	30	20	30	36	31	21	31	37	445	50.5047	6.25244
Q9D8N0	EF1G	Elongation factor 1-gamma	FUNCTION: Probably plays a role in anchoring the complex to other cellular components. {ECO:0000250}.		response to virus [GO:0009615]; translational elongation [GO:0006414]	cytoplasm [GO:0005737]; endoplasmic reticulum [GO:0005783]; nucleus [GO:0005634]	cytoplasm [GO:0005737]; endoplasmic reticulum [GO:0005783]; nucleus [GO:0005634]; translation elongation factor activity [GO:0003746]; response to virus [GO:0009615]; translational elongation [GO:0006414]	translation elongation factor activity [GO:0003746]	GO:0003746; GO:0005634; GO:0005737; GO:0005783; GO:0006414; GO:0009615	RecName: Full=Elongation factor 1-gamma; Short=EF-1-gamma; AltName: Full=eEF-1B gamma - [EF1G_MOUSE]	50.34	1	17	17	251.844	2.78367e+08	1.59793e+08	3.93245e+08	2.42981e+08	35	24	29	36	36	25	30	37	437	50.0292	6.7417
Q91X72	HEMO	Hemopexin	FUNCTION: Binds heme and transports it to the liver for breakdown and iron recovery, after which the free hemopexin returns to the circulation.	SUBCELLULAR LOCATION: Secreted.	cellular iron ion homeostasis [GO:0006879]; heme metabolic process [GO:0042168]; hemoglobin metabolic process [GO:0020027]; positive regulation of humoral immune response mediated by circulating immunoglobulin [GO:0002925]; positive regulation of immunoglobulin production [GO:0002639]; positive regulation of interferon-gamma-mediated signaling pathway [GO:0060335]; positive regulation of response…	cell [GO:0005623]; extracellular space [GO:0005615]	cell [GO:0005623]; extracellular space [GO:0005615]; heme binding [GO:0020037]; heme transporter activity [GO:0015232]; metal ion binding [GO:0046872]; cellular iron ion homeostasis [GO:0006879]; heme metabolic process [GO:0042168]; hemoglobin metabolic process [GO:0020027]; positive regulation of humoral immune response mediated by circulating immunoglobulin [GO:0002925]; positive regulation of …	heme binding [GO:0020037]; heme transporter activity [GO:0015232]; metal ion binding [GO:0046872]	GO:0002639; GO:0002925; GO:0005615; GO:0005623; GO:0006879; GO:0015232; GO:0020027; GO:0020037; GO:0042168; GO:0042531; GO:0046872; GO:0051246; GO:0060332; GO:0060335	RecName: Full=Hemopexin; Flags: Precursor - [HEMO_MOUSE]	51.74	1	21	21	284.34	2.70637e+08	1.68977e+08	1.54086e+08	1.33061e+08	41	35	28	36	42	36	29	37	460	51.2852	7.79639
P13707	GPDA	Glycerol-3-phosphate dehydrogenase [NAD(+)], cytoplasmic	FUNCTION: Has glycerol-3-phosphate dehydrogenase activity. {ECO:0000250|UniProtKB:P21695}.	SUBCELLULAR LOCATION: Cytoplasm {ECO:0000250|UniProtKB:P21695}.	carbohydrate metabolic process [GO:0005975]; cellular response to cAMP [GO:0071320]; cellular response to tumor necrosis factor [GO:0071356]; gluconeogenesis [GO:0006094]; glycerol-3-phosphate catabolic process [GO:0046168]; glycerol-3-phosphate metabolic process [GO:0006072]; glycerolipid metabolic process [GO:0046486]; glycerophosphate shuttle [GO:0006127]; NADH metabolic process [GO:0006734]; …	cytosol [GO:0005829]; glycerol-3-phosphate dehydrogenase complex [GO:0009331]; mitochondrion [GO:0005739]	cytosol [GO:0005829]; glycerol-3-phosphate dehydrogenase complex [GO:0009331]; mitochondrion [GO:0005739]; glycerol-3-phosphate dehydrogenase (quinone) activity [GO:0004368]; glycerol-3-phosphate dehydrogenase [NAD+] activity [GO:0004367]; NAD binding [GO:0051287]; protein homodimerization activity [GO:0042803]; carbohydrate metabolic process [GO:0005975]; cellular response to cAMP [GO:0071320]; …	glycerol-3-phosphate dehydrogenase (quinone) activity [GO:0004368]; glycerol-3-phosphate dehydrogenase [NAD+] activity [GO:0004367]; NAD binding [GO:0051287]; protein homodimerization activity [GO:0042803]	GO:0004367; GO:0004368; GO:0005739; GO:0005829; GO:0005975; GO:0006072; GO:0006094; GO:0006116; GO:0006127; GO:0006734; GO:0009331; GO:0042803; GO:0045821; GO:0046168; GO:0046486; GO:0051287; GO:0071320; GO:0071356	RecName: Full=Glycerol-3-phosphate dehydrogenase [NAD(+)], cytoplasmic; Short=GPD-C; Short=GPDH-C - [GPDA_MOUSE]	61.32	1	17	18	253.875	7.01775e+08	2.80448e+08	6.0415e+08	5.55425e+08	37	27	25	36	38	28	26	37	349	37.5484	7.1665
Q8BW75	AOFB	Amine oxidase [flavin-containing] B	FUNCTION: Catalyzes the oxidative deamination of biogenic and xenobiotic amines and has important functions in the metabolism of neuroactive and vasoactive amines in the central nervous system and peripheral tissues. MAOB preferentially degrades benzylamine and phenylethylamine (By similarity). {ECO:0000250}.	SUBCELLULAR LOCATION: Mitochondrion outer membrane {ECO:0000250}; Single-pass type IV membrane protein {ECO:0000250}; Cytoplasmic side {ECO:0000250}.	negative regulation of serotonin secretion [GO:0014063]; neurotransmitter catabolic process [GO:0042135]; positive regulation of dopamine metabolic process [GO:0045964]; response to aluminum ion [GO:0010044]; response to corticosterone [GO:0051412]; response to ethanol [GO:0045471]; response to lipopolysaccharide [GO:0032496]; response to selenium ion [GO:0010269]	integral component of membrane [GO:0016021]; mitochondrial inner membrane [GO:0005743]; mitochondrial outer membrane [GO:0005741]; mitochondrion [GO:0005739]	integral component of membrane [GO:0016021]; mitochondrial inner membrane [GO:0005743]; mitochondrial outer membrane [GO:0005741]; mitochondrion [GO:0005739]; flavin adenine dinucleotide binding [GO:0050660]; identical protein binding [GO:0042802]; primary amine oxidase activity [GO:0008131]; negative regulation of serotonin secretion [GO:0014063]; neurotransmitter catabolic process [GO:0042135];…	flavin adenine dinucleotide binding [GO:0050660]; identical protein binding [GO:0042802]; primary amine oxidase activity [GO:0008131]	GO:0005739; GO:0005741; GO:0005743; GO:0008131; GO:0010044; GO:0010269; GO:0014063; GO:0016021; GO:0032496; GO:0042135; GO:0042802; GO:0045471; GO:0045964; GO:0050660; GO:0051412	RecName: Full=Amine oxidase [flavin-containing] B; AltName: Full=Monoamine oxidase type B; Short=MAO-B - [AOFB_MOUSE]	45.58	1	16	18	264.03	4.31877e+08	2.30391e+08	2.57615e+08	2.49249e+08	43	27	24	36	44	28	25	37	520	58.5204	8.29443
P33267	CP2F2	Cytochrome P450 2F2	FUNCTION: Involved in the regio- and stereoselective transformation of naphthalene to trans-1R-hydroxy-2R-glutathionyl-1,2-dihydronaphthalene in the presence of glutathione and glutathione S-transferases. It specifically catalyzes the production of a very reactive and potentially toxic intermediate, the 2R,2S arene oxide, that is associated with necrosis of the unciliated bronchiolar epithelial c…	SUBCELLULAR LOCATION: Endoplasmic reticulum membrane; Peripheral membrane protein. Microsome membrane; Peripheral membrane protein.	epoxygenase P450 pathway [GO:0019373]; exogenous drug catabolic process [GO:0042738]; naphthalene metabolic process [GO:0018931]; organic acid metabolic process [GO:0006082]; oxidation-reduction process [GO:0055114]; response to toxic substance [GO:0009636]; trichloroethylene metabolic process [GO:0018979]; xenobiotic metabolic process [GO:0006805]	cytoplasm [GO:0005737]; endoplasmic reticulum membrane [GO:0005789]; intracellular membrane-bounded organelle [GO:0043231]	cytoplasm [GO:0005737]; endoplasmic reticulum membrane [GO:0005789]; intracellular membrane-bounded organelle [GO:0043231]; arachidonic acid epoxygenase activity [GO:0008392]; heme binding [GO:0020037]; iron ion binding [GO:0005506]; monooxygenase activity [GO:0004497]; oxidoreductase activity, acting on paired donors, with incorporation or reduction of molecular oxygen, reduced flavin or flavopr…	arachidonic acid epoxygenase activity [GO:0008392]; heme binding [GO:0020037]; iron ion binding [GO:0005506]; monooxygenase activity [GO:0004497]; oxidoreductase activity, acting on paired donors, with incorporation or reduction of molecular oxygen, reduced flavin or flavoprotein as one donor, and incorporation of one atom of oxygen [GO:0016712]; oxygen binding [GO:0019825]; steroid hydroxylase a…	GO:0004497; GO:0005506; GO:0005737; GO:0005789; GO:0006082; GO:0006805; GO:0008392; GO:0008395; GO:0009636; GO:0016712; GO:0018931; GO:0018979; GO:0019373; GO:0019825; GO:0020037; GO:0042738; GO:0043231; GO:0055114	RecName: Full=Cytochrome P450 2F2; AltName: Full=CYPIIF2; AltName: Full=Cytochrome P450-NAH-2; AltName: Full=Naphthalene dehydrogenase; AltName: Full=Naphthalene hydroxylase - [CP2F2_MOUSE]	49.49	1	22	23	337.146	5.31174e+08	2.69865e+08	1.45853e+08	2.27332e+08	60	49	21	36	62	51	22	37	491	55.913	7.89893
Q99JY0	ECHB	Trifunctional enzyme subunit beta, mitochondrial	FUNCTION: Mitochondrial trifunctional enzyme catalyzes the last three of the four reactions of the mitochondrial beta-oxidation pathway. The mitochondrial beta-oxidation pathway is the major energy-producing process in tissues and is performed through four consecutive reactions breaking down fatty acids into acetyl-CoA. Among the enzymes involved in this pathway, the trifunctional enzyme exhibits…	SUBCELLULAR LOCATION: Mitochondrion {ECO:0000250|UniProtKB:P55084}. Mitochondrion inner membrane {ECO:0000250|UniProtKB:P55084}. Mitochondrion outer membrane {ECO:0000250|UniProtKB:P55084}. Endoplasmic reticulum {ECO:0000250|UniProtKB:P55084}. Note=Protein stability and association with membranes require HADHA. {ECO:0000250|UniProtKB:P55084}.	fatty acid beta-oxidation [GO:0006635]	endoplasmic reticulum [GO:0005783]; mitochondrial fatty acid beta-oxidation multienzyme complex [GO:0016507]; mitochondrial inner membrane [GO:0005743]; mitochondrial nucleoid [GO:0042645]; mitochondrial outer membrane [GO:0005741]; mitochondrion [GO:0005739]	endoplasmic reticulum [GO:0005783]; mitochondrial fatty acid beta-oxidation multienzyme complex [GO:0016507]; mitochondrial inner membrane [GO:0005743]; mitochondrial nucleoid [GO:0042645]; mitochondrial outer membrane [GO:0005741]; mitochondrion [GO:0005739]; acetyl-CoA C-acyltransferase activity [GO:0003988]; acetyl-CoA C-myristoyltransferase activity [GO:0050633]; protein-containing complex bi…	acetyl-CoA C-acyltransferase activity [GO:0003988]; acetyl-CoA C-myristoyltransferase activity [GO:0050633]; protein-containing complex binding [GO:0044877]	GO:0003988; GO:0005739; GO:0005741; GO:0005743; GO:0005783; GO:0006635; GO:0016507; GO:0042645; GO:0044877; GO:0050633	RecName: Full=Trifunctional enzyme subunit beta, mitochondrial; AltName: Full=TP-beta; Includes: RecName: Full=3-ketoacyl-CoA thiolase; AltName: Full=Acetyl-CoA acyltransferase; AltName: Full=Beta-ketothiolase; Flags: Precursor - [ECHB_MOUSE]	56.84	3	22	22	290.433	899939271	3.96142e+08	6.87679e+08	4.13043e+08	41	33	34	35	42	34	35	36	475	51.3534	9.37842
P55096	ABCD3	ATP-binding cassette sub-family D member 3	FUNCTION: Probable transporter involved in the transport of branched-chain fatty acids and C27 bile acids into the peroxisome; the latter function is a crucial step in bile acid biosynthesis. The nucleotide-binding fold acts as an ATP-binding subunit with ATPase activity. {ECO:0000250|UniProtKB:P28288}.	SUBCELLULAR LOCATION: Peroxisome membrane; Multi-pass membrane protein.	fatty acid beta-oxidation [GO:0006635]; fatty acid biosynthetic process [GO:0006633]; long-chain fatty acid import into peroxisome [GO:0015910]; peroxisome organization [GO:0007031]; response to drug [GO:0042493]; response to organic cyclic compound [GO:0014070]; very long-chain fatty acid catabolic process [GO:0042760]	integral component of membrane [GO:0016021]; intracellular membrane-bounded organelle [GO:0043231]; mitochondrial inner membrane [GO:0005743]; mitochondrion [GO:0005739]; peroxisomal matrix [GO:0005782]; peroxisomal membrane [GO:0005778]; peroxisome [GO:0005777]	integral component of membrane [GO:0016021]; intracellular membrane-bounded organelle [GO:0043231]; mitochondrial inner membrane [GO:0005743]; mitochondrion [GO:0005739]; peroxisomal matrix [GO:0005782]; peroxisomal membrane [GO:0005778]; peroxisome [GO:0005777]; ATP binding [GO:0005524]; ATPase activity [GO:0016887]; ATPase-coupled transmembrane transporter activity [GO:0042626]; long-chain fatt…	ATPase activity [GO:0016887]; ATPase-coupled transmembrane transporter activity [GO:0042626]; ATP binding [GO:0005524]; long-chain fatty acid transporter activity [GO:0005324]; protein homodimerization activity [GO:0042803]; protein self-association [GO:0043621]	GO:0005324; GO:0005524; GO:0005739; GO:0005743; GO:0005777; GO:0005778; GO:0005782; GO:0006633; GO:0006635; GO:0007031; GO:0014070; GO:0015910; GO:0016021; GO:0016887; GO:0042493; GO:0042626; GO:0042760; GO:0042803; GO:0043231; GO:0043621	RecName: Full=ATP-binding cassette sub-family D member 3; AltName: Full=68 kDa peroxisomal membrane protein; Short=PMP68; AltName: Full=70 kDa peroxisomal membrane protein; Short=PMP70 - [ABCD3_MOUSE]	33.23	1	17	17	264.03	4.84009e+08	2.30918e+08	3.35972e+08	4.68066e+08	37	28	30	35	38	29	31	36	659	75.4263	9.26123
P57780	ACTN4	Alpha-actinin-4	FUNCTION: F-actin cross-linking protein which is thought to anchor actin to a variety of intracellular structures. This is a bundling protein. Probably involved in vesicular trafficking via its association with the CART complex. The CART complex is necessary for efficient transferrin receptor recycling but not for EGFR degradation (By similarity). Involved in tight junction assembly in epithelial…	SUBCELLULAR LOCATION: Nucleus {ECO:0000250|UniProtKB:O43707}. Cytoplasm {ECO:0000250|UniProtKB:O43707}. Cell junction {ECO:0000269|PubMed:18332111}. Cytoplasm, cytoskeleton, stress fiber {ECO:0000250|UniProtKB:O43707}. Note=Localized in cytoplasmic mRNP granules containing untranslated mRNAs. {ECO:0000250|UniProtKB:O43707}.	actin filament bundle assembly [GO:0051017]; bicellular tight junction assembly [GO:0070830]; negative regulation of cellular component movement [GO:0051271]; negative regulation of substrate adhesion-dependent cell spreading [GO:1900025]; peroxisome proliferator activated receptor signaling pathway [GO:0035357]; positive regulation of cell migration [GO:0030335]; positive regulation of cellular …	cell [GO:0005623]; cell-cell junction [GO:0005911]; cortical cytoskeleton [GO:0030863]; cytoplasm [GO:0005737]; cytosol [GO:0005829]; neuron projection [GO:0043005]; nuclear body [GO:0016604]; nucleus [GO:0005634]; perinuclear region of cytoplasm [GO:0048471]; protein-containing complex [GO:0032991]; pseudopodium [GO:0031143]; ribonucleoprotein complex [GO:1990904]; stress fiber [GO:0001725]; Z d…	cell [GO:0005623]; cell-cell junction [GO:0005911]; cortical cytoskeleton [GO:0030863]; cytoplasm [GO:0005737]; cytosol [GO:0005829]; neuron projection [GO:0043005]; nuclear body [GO:0016604]; nucleus [GO:0005634]; perinuclear region of cytoplasm [GO:0048471]; protein-containing complex [GO:0032991]; pseudopodium [GO:0031143]; ribonucleoprotein complex [GO:1990904]; stress fiber [GO:0001725]; Z d…	actin filament binding [GO:0051015]; calcium ion binding [GO:0005509]; chromatin DNA binding [GO:0031490]; ion channel binding [GO:0044325]; nuclear hormone receptor binding [GO:0035257]; nuclear receptor transcription coactivator activity [GO:0030374]; nucleoside binding [GO:0001882]; protein-containing complex binding [GO:0044877]; protein homodimerization activity [GO:0042803]; protein N-termi…	GO:0000977; GO:0001666; GO:0001725; GO:0001882; GO:0003713; GO:0005509; GO:0005623; GO:0005634; GO:0005737; GO:0005829; GO:0005911; GO:0015031; GO:0016604; GO:0030018; GO:0030050; GO:0030335; GO:0030374; GO:0030863; GO:0031143; GO:0031490; GO:0032991; GO:0033209; GO:0035257; GO:0035357; GO:0042803; GO:0042974; GO:0042981; GO:0043005; GO:0044325; GO:0044877; GO:0047485; GO:0048384; GO:0048471; GO:…	RecName: Full=Alpha-actinin-4; AltName: Full=Non-muscle alpha-actinin 4 - [ACTN4_MOUSE]	41.45	3	18	28	207.162	1.19757e+08	7.64369e+07	8.9331e+07	1.07981e+08	21	23	23	35	22	24	24	36	912	104.911	5.41455
P61922	GABT	4-aminobutyrate aminotransferase, mitochondrial	FUNCTION: Catalyzes the conversion of gamma-aminobutyrate and L-beta-aminoisobutyrate to succinate semialdehyde and methylmalonate semialdehyde, respectively. Can also convert delta-aminovalerate and beta-alanine (By similarity). {ECO:0000250}.	SUBCELLULAR LOCATION: Mitochondrion matrix {ECO:0000250}.	aging [GO:0007568]; behavioral response to cocaine [GO:0048148]; cerebellum development [GO:0021549]; copulation [GO:0007620]; exploration behavior [GO:0035640]; gamma-aminobutyric acid biosynthetic process [GO:0009449]; gamma-aminobutyric acid catabolic process [GO:0009450]; gamma-aminobutyric acid metabolic process [GO:0009448]; locomotory behavior [GO:0007626]; negative regulation of blood pre…	4-aminobutyrate transaminase complex [GO:0032144]; mitochondrial matrix [GO:0005759]; mitochondrion [GO:0005739]; neuron projection [GO:0043005]	4-aminobutyrate transaminase complex [GO:0032144]; mitochondrial matrix [GO:0005759]; mitochondrion [GO:0005739]; neuron projection [GO:0043005]; (S)-3-amino-2-methylpropionate transaminase activity [GO:0047298]; 4-aminobutyrate transaminase activity [GO:0003867]; 4-aminobutyrate:2-oxoglutarate transaminase activity [GO:0034386]; identical protein binding [GO:0042802]; iron-sulfur cluster binding…	(S)-3-amino-2-methylpropionate transaminase activity [GO:0047298]; 4-aminobutyrate:2-oxoglutarate transaminase activity [GO:0034386]; 4-aminobutyrate transaminase activity [GO:0003867]; identical protein binding [GO:0042802]; iron-sulfur cluster binding [GO:0051536]; metal ion binding [GO:0046872]; pyridoxal phosphate binding [GO:0030170]; succinate-semialdehyde dehydrogenase binding [GO:0032145]	GO:0001666; GO:0003867; GO:0005739; GO:0005759; GO:0007568; GO:0007620; GO:0007626; GO:0009448; GO:0009449; GO:0009450; GO:0010039; GO:0014053; GO:0021549; GO:0030170; GO:0031652; GO:0032024; GO:0032144; GO:0032145; GO:0033602; GO:0034386; GO:0035094; GO:0035640; GO:0042220; GO:0042493; GO:0042802; GO:0043005; GO:0045471; GO:0045776; GO:0045964; GO:0046872; GO:0047298; GO:0048148; GO:0051536; GO:…	RecName: Full=4-aminobutyrate aminotransferase, mitochondrial; AltName: Full=(S)-3-amino-2-methylpropionate transaminase; AltName: Full=GABA aminotransferase; Short=GABA-AT; AltName: Full=Gamma-amino-N-butyrate transaminase; Short=GABA transaminase; Short=GABA-T; AltName: Full=L-AIBAT; Flags: Precursor - [GABT_MOUSE]	62.4	1	20	20	251.844	2.51712e+09	1.22259e+09	9.75787e+07	1.30961e+08	40	32	17	35	41	33	18	36	500	56.4156	8.08936
P56593	CP2AC	Cytochrome P450 2A12	FUNCTION: Highly active in the 7-alpha-hydroxylation of testosterone.	SUBCELLULAR LOCATION: Endoplasmic reticulum membrane; Peripheral membrane protein. Microsome membrane; Peripheral membrane protein.	coumarin metabolic process [GO:0009804]; epoxygenase P450 pathway [GO:0019373]; exogenous drug catabolic process [GO:0042738]; organic acid metabolic process [GO:0006082]; oxidation-reduction process [GO:0055114]; xenobiotic metabolic process [GO:0006805]	cytoplasm [GO:0005737]; endoplasmic reticulum membrane [GO:0005789]; intracellular membrane-bounded organelle [GO:0043231]	cytoplasm [GO:0005737]; endoplasmic reticulum membrane [GO:0005789]; intracellular membrane-bounded organelle [GO:0043231]; arachidonic acid epoxygenase activity [GO:0008392]; aromatase activity [GO:0070330]; heme binding [GO:0020037]; iron ion binding [GO:0005506]; oxidoreductase activity, acting on paired donors, with incorporation or reduction of molecular oxygen, reduced flavin or flavoprotei…	arachidonic acid epoxygenase activity [GO:0008392]; aromatase activity [GO:0070330]; heme binding [GO:0020037]; iron ion binding [GO:0005506]; oxidoreductase activity, acting on paired donors, with incorporation or reduction of molecular oxygen, reduced flavin or flavoprotein as one donor, and incorporation of one atom of oxygen [GO:0016712]; steroid hydroxylase activity [GO:0008395]	GO:0005506; GO:0005737; GO:0005789; GO:0006082; GO:0006805; GO:0008392; GO:0008395; GO:0009804; GO:0016712; GO:0019373; GO:0020037; GO:0042738; GO:0043231; GO:0055114; GO:0070330	RecName: Full=Cytochrome P450 2A12; AltName: Full=CYPIIA12; AltName: Full=Steroid hormones 7-alpha-hydroxylase; AltName: Full=Testosterone 7-alpha-hydroxylase - [CP2AC_MOUSE]	53.25	1	19	21	192.945	2.42453e+08	1.53031e+08	2.64804e+08	2.36772e+08	24	21	15	35	25	22	15	36	492	56.1431	9.18799
P52825	CPT2	Carnitine O-palmitoyltransferase 2, mitochondrial		SUBCELLULAR LOCATION: Mitochondrion inner membrane {ECO:0000250}; Peripheral membrane protein {ECO:0000250}; Matrix side {ECO:0000250}.	fatty acid beta-oxidation [GO:0006635]; in utero embryonic development [GO:0001701]; positive regulation of cold-induced thermogenesis [GO:0120162]	mitochondrial inner membrane [GO:0005743]; mitochondrion [GO:0005739]; nucleolus [GO:0005730]; nucleoplasm [GO:0005654]	mitochondrial inner membrane [GO:0005743]; mitochondrion [GO:0005739]; nucleolus [GO:0005730]; nucleoplasm [GO:0005654]; carnitine O-palmitoyltransferase activity [GO:0004095]; fatty acid beta-oxidation [GO:0006635]; in utero embryonic development [GO:0001701]; positive regulation of cold-induced thermogenesis [GO:0120162]	carnitine O-palmitoyltransferase activity [GO:0004095]	GO:0001701; GO:0004095; GO:0005654; GO:0005730; GO:0005739; GO:0005743; GO:0006635; GO:0120162	RecName: Full=Carnitine O-palmitoyltransferase 2, mitochondrial; AltName: Full=Carnitine palmitoyltransferase II; Short=CPT II; Flags: Precursor - [CPT2_MOUSE]	39.67	1	24	24	257.937	1.84691e+08	1.05083e+08	811001226	7.24143e+08	34	23	36	34	35	24	37	35	658	73.9336	8.36768
Q9R0P3	ESTD	S-formylglutathione hydrolase	FUNCTION: Serine hydrolase involved in the detoxification of formaldehyde. {ECO:0000250}.	SUBCELLULAR LOCATION: Cytoplasm. Cytoplasmic vesicle {ECO:0000250}.	formaldehyde catabolic process [GO:0046294]	cytoplasmic vesicle [GO:0031410]; cytosol [GO:0005829]	cytoplasmic vesicle [GO:0031410]; cytosol [GO:0005829]; carboxylic ester hydrolase activity [GO:0052689]; hydrolase activity, acting on ester bonds [GO:0016788]; identical protein binding [GO:0042802]; S-formylglutathione hydrolase activity [GO:0018738]; formaldehyde catabolic process [GO:0046294]	carboxylic ester hydrolase activity [GO:0052689]; hydrolase activity, acting on ester bonds [GO:0016788]; identical protein binding [GO:0042802]; S-formylglutathione hydrolase activity [GO:0018738]	GO:0005829; GO:0016788; GO:0018738; GO:0031410; GO:0042802; GO:0046294; GO:0052689	RecName: Full=S-formylglutathione hydrolase; Short=FGH; AltName: Full=Esterase 10; AltName: Full=Esterase D; AltName: Full=Sid 478 - [ESTD_MOUSE]	60.64	1	12	12	286.371	7.87674e+08	4.95156e+08	5.97273e+08	4.40258e+08	45	28	34	34	46	29	35	35	282	31.2993	7.12256
P55264	ADK	Adenosine kinase	FUNCTION: ATP dependent phosphorylation of adenosine and other related nucleoside analogs to monophosphate derivatives. Serves as a potential regulator of concentrations of extracellular adenosine and intracellular adenine nucleotides.	SUBCELLULAR LOCATION: [Isoform Long]: Nucleus {ECO:0000250|UniProtKB:P55263}.; SUBCELLULAR LOCATION: [Isoform Short]: Cytoplasm {ECO:0000250|UniProtKB:P55263}.	adenosine metabolic process [GO:0046085]; AMP salvage [GO:0044209]; dATP biosynthetic process [GO:0006175]; positive regulation of cardiac muscle hypertrophy [GO:0010613]; positive regulation of T cell proliferation [GO:0042102]; purine ribonucleoside salvage [GO:0006166]; type B pancreatic cell proliferation [GO:0044342]	cytoplasm [GO:0005737]; cytosol [GO:0005829]; nucleoplasm [GO:0005654]; nucleus [GO:0005634]	cytoplasm [GO:0005737]; cytosol [GO:0005829]; nucleoplasm [GO:0005654]; nucleus [GO:0005634]; adenosine kinase activity [GO:0004001]; ATP binding [GO:0005524]; metal ion binding [GO:0046872]; adenosine metabolic process [GO:0046085]; AMP salvage [GO:0044209]; dATP biosynthetic process [GO:0006175]; positive regulation of cardiac muscle hypertrophy [GO:0010613]; positive regulation of T cell proli…	adenosine kinase activity [GO:0004001]; ATP binding [GO:0005524]; metal ion binding [GO:0046872]	GO:0004001; GO:0005524; GO:0005634; GO:0005654; GO:0005737; GO:0005829; GO:0006166; GO:0006175; GO:0010613; GO:0042102; GO:0044209; GO:0044342; GO:0046085; GO:0046872	RecName: Full=Adenosine kinase; Short=AK; AltName: Full=Adenosine 5'-phosphotransferase - [ADK_MOUSE]	37.12	1	13	13	276.216	959795456	856516515	7.12536e+08	6.56268e+08	35	38	29	34	36	39	30	35	361	40.1235	6.21436
Q9CZN7	GLYM	Serine hydroxymethyltransferase, mitochondrial (SHMT) (EC 2.1.2.1) (Glycine hydroxymethyltransferase) (Serine methylase)	FUNCTION: Catalyzes the cleavage of serine to glycine accompanied with the production of 5,10-methylenetetrahydrofolate, an essential intermediate for purine biosynthesis (By similarity). Serine provides the major source of folate one-carbon in cells by catalyzing the transfer of one carbon from serine to tetrahydrofolate (By similarity). Contributes to the de novo mitochondrial thymidylate biosy…	SUBCELLULAR LOCATION: Mitochondrion {ECO:0000250|UniProtKB:P34897}. Mitochondrion matrix, mitochondrion nucleoid {ECO:0000250|UniProtKB:P34897}. Mitochondrion inner membrane {ECO:0000250|UniProtKB:P34897}. Cytoplasm {ECO:0000250|UniProtKB:P34897}. Nucleus {ECO:0000250|UniProtKB:P34897}. Note=Mainly localizes in the mitochondrion. Also found in the cytoplasm and nucleus as part of the BRISC comple…	cellular response to tetrahydrofolate [GO:1904482]; folic acid metabolic process [GO:0046655]; glycine biosynthetic process [GO:0006545]; glycine biosynthetic process from serine [GO:0019264]; glycine metabolic process [GO:0006544]; L-serine biosynthetic process [GO:0006564]; L-serine catabolic process [GO:0006565]; L-serine metabolic process [GO:0006563]; one-carbon metabolic process [GO:0006730…	BRISC complex [GO:0070552]; cytoplasm [GO:0005737]; microtubule cytoskeleton [GO:0015630]; mitochondrial inner membrane [GO:0005743]; mitochondrial intermembrane space [GO:0005758]; mitochondrial matrix [GO:0005759]; mitochondrial nucleoid [GO:0042645]; mitochondrion [GO:0005739]; nucleus [GO:0005634]	BRISC complex [GO:0070552]; cytoplasm [GO:0005737]; microtubule cytoskeleton [GO:0015630]; mitochondrial inner membrane [GO:0005743]; mitochondrial intermembrane space [GO:0005758]; mitochondrial matrix [GO:0005759]; mitochondrial nucleoid [GO:0042645]; mitochondrion [GO:0005739]; nucleus [GO:0005634]; amino acid binding [GO:0016597]; chromatin binding [GO:0003682]; cobalt ion binding [GO:0050897…	amino acid binding [GO:0016597]; chromatin binding [GO:0003682]; cobalt ion binding [GO:0050897]; glycine hydroxymethyltransferase activity [GO:0004372]; identical protein binding [GO:0042802]; L-allo-threonine aldolase activity [GO:0008732]; pyridoxal phosphate binding [GO:0030170]; serine binding [GO:0070905]; zinc ion binding [GO:0008270]	GO:0002082; GO:0003682; GO:0004372; GO:0005634; GO:0005737; GO:0005739; GO:0005743; GO:0005758; GO:0005759; GO:0006544; GO:0006545; GO:0006563; GO:0006564; GO:0006565; GO:0006730; GO:0008270; GO:0008284; GO:0008732; GO:0015630; GO:0016597; GO:0019264; GO:0030170; GO:0034340; GO:0035999; GO:0042645; GO:0042802; GO:0046653; GO:0046655; GO:0050897; GO:0051262; GO:0051289; GO:0070129; GO:0070536; GO:…	RecName: Full=Serine hydroxymethyltransferase, mitochondrial; Short=SHMT; AltName: Full=Glycine hydroxymethyltransferase; AltName: Full=Serine methylase; Flags: Precursor - [GLYM_MOUSE]	49.8	1	18	19	266.061	2.90236e+08	1.38856e+08	2.01509e+08	1.7416e+08	37	32	28	34	38	33	29	35	504	55.7236	8.47021
Q07417	ACADS	Short-chain specific acyl-CoA dehydrogenase, mitochondrial	FUNCTION: Short-chain specific acyl-CoA dehydrogenase is one of the acyl-CoA dehydrogenases that catalyze the first step of mitochondrial fatty acid beta-oxidation, an aerobic process breaking down fatty acids into acetyl-CoA and allowing the production of energy from fats. The first step of fatty acid beta-oxidation consists in the removal of one hydrogen from C-2 and C-3 of the straight-chain f…	SUBCELLULAR LOCATION: Mitochondrion matrix {ECO:0000250|UniProtKB:Q3ZBF6}.	butyrate catabolic process [GO:0046359]; fatty acid beta-oxidation using acyl-CoA dehydrogenase [GO:0033539]	centrosome [GO:0005813]; mitochondrial matrix [GO:0005759]; mitochondrial membrane [GO:0031966]; mitochondrion [GO:0005739]; nucleoplasm [GO:0005654]	centrosome [GO:0005813]; mitochondrial matrix [GO:0005759]; mitochondrial membrane [GO:0031966]; mitochondrion [GO:0005739]; nucleoplasm [GO:0005654]; acyl-CoA dehydrogenase activity [GO:0003995]; butyryl-CoA dehydrogenase activity [GO:0004085]; fatty-acyl-CoA binding [GO:0000062]; flavin adenine dinucleotide binding [GO:0050660]; identical protein binding [GO:0042802]; butyrate catabolic process…	acyl-CoA dehydrogenase activity [GO:0003995]; butyryl-CoA dehydrogenase activity [GO:0004085]; fatty-acyl-CoA binding [GO:0000062]; flavin adenine dinucleotide binding [GO:0050660]; identical protein binding [GO:0042802]	GO:0000062; GO:0003995; GO:0004085; GO:0005654; GO:0005739; GO:0005759; GO:0005813; GO:0031966; GO:0033539; GO:0042802; GO:0046359; GO:0050660	RecName: Full=Short-chain specific acyl-CoA dehydrogenase, mitochondrial; Short=SCAD; AltName: Full=Butyryl-CoA dehydrogenase; Flags: Precursor - [ACADS_MOUSE]	47.09	1	17	17	284.34	5.08748e+08	4.15288e+08	4.74486e+08	3.02702e+08	40	39	27	34	41	40	28	35	412	44.8611	8.47021
Q9DBJ1	PGAM1	Phosphoglycerate mutase 1	FUNCTION: Interconversion of 3- and 2-phosphoglycerate with 2,3-bisphosphoglycerate as the primer of the reaction. Can also catalyze the reaction of EC 5.4.2.4 (synthase), but with a reduced activity.		glycolytic process [GO:0006096]; regulation of glycolytic process [GO:0006110]; regulation of pentose-phosphate shunt [GO:0043456]; respiratory burst [GO:0045730]	cytoplasm [GO:0005737]; cytosol [GO:0005829]; myelin sheath [GO:0043209]; nucleus [GO:0005634]	cytoplasm [GO:0005737]; cytosol [GO:0005829]; myelin sheath [GO:0043209]; nucleus [GO:0005634]; bisphosphoglycerate mutase activity [GO:0004082]; hydrolase activity [GO:0016787]; phosphoglycerate mutase activity [GO:0004619]; protein kinase binding [GO:0019901]; glycolytic process [GO:0006096]; regulation of glycolytic process [GO:0006110]; regulation of pentose-phosphate shunt [GO:0043456]; resp…	bisphosphoglycerate mutase activity [GO:0004082]; hydrolase activity [GO:0016787]; phosphoglycerate mutase activity [GO:0004619]; protein kinase binding [GO:0019901]	GO:0004082; GO:0004619; GO:0005634; GO:0005737; GO:0005829; GO:0006096; GO:0006110; GO:0016787; GO:0019901; GO:0043209; GO:0043456; GO:0045730	RecName: Full=Phosphoglycerate mutase 1; AltName: Full=BPG-dependent PGAM 1; AltName: Full=Phosphoglycerate mutase isozyme B; Short=PGAM-B - [PGAM1_MOUSE]	46.06	2	12	12	255.906	695006685	3.02156e+08	5.31091e+08	5.32414e+08	35	30	27	34	36	31	28	35	254	28.8139	7.18115
[truncated: 3,180 more rows]

## Sheet: 2. ER stress UPR liver
Uniprot ID	Protein	Short-Name	Function [CC]	Subcellular location [CC]	Gene ontology (biological process)	Gene ontology (cellular component)	Gene ontology (GO)	Gene ontology (molecular function)	Gene ontology IDs	Description	ΣCoverage	Σ# Proteins	Σ# Unique Peptides	Σ# Peptides	Σ# PSMs	Oil+EV 1 PSM	OIL+CR-1 PSM	CCl4+EV-1 PSM	CCL4+CR-1 PSM	Oil+EV 2 PSM	OIL+CR-2 PSM	CCl4+EV-2 PSM	CCL4+CR-2 PSM	# AAs	MW [kDa]	calc. pI
[truncated: 27 more rows]

## Sheet: 3. Proteomics HSC
Accession	Gene	Short-Name	Function [CC]	Subcellular location [CC]	Gene ontology (biological process)	Gene ontology (cellular component)	Gene ontology (GO)	Gene ontology (molecular function)	Gene ontology IDs	Description	ΣCoverage	Σ# Proteins	Σ# Unique Peptides	Σ# Peptides	Σ# PSMs	1-IP: Area	2-IP: Area	3-IP: Area	4-IP: Area	Oil+EV-HSC-PSM	OIL+CR-HSC PSM	CCl4+EV-HSC PSM	CCL4+CR-HSC PSM	# AAs	MW [kDa]	calc. pI
[truncated: 92 more rows]
